# Supplementary material for: Pharmacological inhibition of lysine-specific demethylase 1 (LSD1) induces global transcriptional deregulation and ultrastructural alterations that impair viability in Schistosoma mansoni
Source: PLoS Negl Trop Dis. 2020 Jul 1;14(7):e0008332. doi: 10.1371/journal.pntd.0008332 (PMC7329083; doi:10.1371/journal.pntd.0008332)
Supplement: S3 Table — (XLSX) [file pntd.0008332.s011.xlsx]

## Sheet: Schistosomula_Up
List of upregulated genes_Schistosomula
geneID	fpkm-control_1-cuffquant	fpkm-control_0-cuffquant	fpkm-control_2-cuffquant	fpkm-control_3-cuffquant	fpkm-treated_3-cuffquant	fpkm-treated_0-cuffquant	fpkm-treated_2-cuffquant	fpkm-treated_1-cuffquant	log2(fold_change)-cuffdiff	p-value-cuffdiff	q-value-cuffdiff	tpm-control1-kallisto	tpm-control2-kallisto	tpm-control3-kallisto	tpm-control4-kallisto	tpm-treated1-kallisto	tpm-treated2-kallisto	tpm-treated3-kallisto	tpm-treated4-kallisto	b-sleuth	p-value-sleuth	q-value-sleuth	TPM-control1-sailfish	TPM-control2-sailfish	TPM-control3-sailfish	TPM-control4-sailfish	TPM-treated1-sailfish	TPM-treated2-sailfish	TPM-treated3-sailfish	TPM-treated4-sailfish	log2FC-edgeR	p-value-edgeR	q-value-edgeR	GO_terms	product_description	swissProtAnnotationOfSMansoniGene	humanHomologous-hit	humanHomologous-hitDescription
SmVG_024919	4.02447	4.73598	3.71882	4.72715	19.9315	6.17652	7.21654	9.73039	1.32323	0.00075	0.0158697	6.33047	4.76591	3.15323	4.06393	5.85449	10.1737	7.03771	12.9594	0.835708	0.0021662	0.0427723	4.80983	3.01681	2.12729	3.1365	3.93927	7.17776	4.30117	7.2785	1.18258	0.00224727	0.0297428
SmVG_018582:Smp_149060	3.47571	3.90635	4.9633	5.33419	7.28048	9.7674	11.1149	7.1264	0.997145	5e-05	0.0017469	4.68857	3.45443	4.43113	4.08351	7.51367	5.69983	8.22356	3.80668	0.545396	0.00025541	0.0108522	2.99033	2.16352	2.91314	2.42718	4.78728	3.48872	4.97799	2.06477	0.800967	0.000500079	0.010371		U3 small nucleolar RNA associated protein 22;Smp_149060	Putative uncharacterized protein [Source:UniProtKB/TrEMBL;Acc:G4LWJ4]	_	_
SmVG_018582:Smp_198220	3.47571	3.90635	4.9633	5.33419	7.28048	9.7674	11.1149	7.1264	0.997145	5e-05	0.0017469	4.68857	3.45443	4.43113	4.08351	7.51367	5.69983	8.22356	3.80668	0.545396	0.00025541	0.0108522	2.99033	2.16352	2.91314	2.42718	4.78728	3.48872	4.97799	2.06477	0.800967	0.000500079	0.010371		hypothetical protein;Smp_198220	Putative uncharacterized protein [Source:UniProtKB/TrEMBL;Acc:G4LWJ5]	_	_
Smp_040990	2.1201	1.23722	2.43215	2.072	3.49586	3.38656	4.53788	4.08612	0.979995	0.00055	0.012615	2.8983	3.2356	3.70453	2.20338	4.29916	5.32445	5.67639	3.02439	0.574162	0.000351269	0.0135104	1.73664	1.78855	2.24468	1.15872	2.40459	2.95888	3.07001	1.45111	0.810492	0.000325102	0.00794277		Ribonuclease H2 subunit C;note=predicted by EVM2;note=trans_spliced (SO:0000870);note=pfam_scan%3BPfam:PF08615.6%3B%3BE()%3D1.9E-9%3Bscore%3D37.3%3Bquer y 3-115%3Bdescription%3DRNase_H2_suC;note=iprscan%3BInterPro:IPR013924 : Ribonuclease H1 small subunit%3BPfam:PF08615%3B%3Bscore%3D2.1E-8%3Bquery 2-115%3Bdescription%3DRibonuclease H2%2C subunit C;Smp_040990	Putative uncharacterized protein [Source:UniProtKB/TrEMBL;Acc:G4V7K2]	_	_
SmVG_015361	8.33341	6.42162	12.6195	8.13239	15.7967	16.9828	17.4954	18.5612	0.955064	5e-05	0.0017469	7.28622	8.39269	12.869	6.45277	15.6441	18.0419	14.1948	9.47352	0.675242	5.32447e-05	0.00345185	5.12465	5.08515	7.82989	3.61381	8.87639	9.93821	7.69316	4.41639	0.835757	0.00019997	0.00544695
SmVG_016484	10.9086	11.734	14.9959	13.5167	24.8339	27.8891	24.2611	21.6862	0.947738	0.00035	0.00891215	68.881	60.4015	83.6117	47.7536	106.345	75.9974	117.537	60.3182	0.500545	0.00214076	0.0427723	58.7253	51.0701	72.9676	37.6269	92.9541	68.7498	93.9446	42.5498	0.752999	0.000191029	0.00526224
Smp_125090	11.2334	7.39251	8.14642	17.6733	21.0707	21.8619	18.6069	21.844	0.907721	5e-05	0.0017469	31.1666	42.457	32.5404	46.3334	59.3864	70.475	52.0065	44.1973	0.574472	0.000335726	0.0131704	25.4961	33.5991	26.0793	33.9657	48.7917	58.6712	41.4186	28.8153	0.810727	9.72581e-05	0.00323898		hypothetical protein;Smp_125090
SmVG_024049	4.03153	2.20472	5.59223	5.54976	7.55538	6.69013	12.6846	5.62252	0.90549	0.00315	0.0430866	8.55941	9.19403	12.3794	10.5713	14.2758	19.0444	17.9293	16.8605	0.700731	0.000161666	0.00823188	15.2174	13.4953	18.1556	16.3062	22.2188	27.6241	25.5772	18.4726	0.879098	2.40185e-05	0.00111253	GO:0008270
SmVG_014816	7.0576	7.14839	12.9293	8.30357	14.7256	15.7116	19.1872	15.8601	0.88582	0.00015	0.00443311	9.2696	8.98785	14.8308	8.01796	18.1718	17.4466	19.907	10.7838	0.651281	8.1784e-05	0.00480653	3.4216	3.395	6.657	3.00018	7.0101	7.58688	8.022	3.49942	0.932273	0.000575079	0.0114078
SmVG_023346	11.1914	12.6514	16.0774	13.2936	22.1527	22.8972	27.9955	24.52	0.874568	5e-05	0.0017469	17.5072	12.5283	16.5792	12.0357	31.5522	25.8938	23.1284	14.0225	0.623592	1.23469e-06	0.00018269	12.5649	9.20324	12.6135	8.16266	21.2175	17.8818	15.9793	8.96874	0.862992	6.44072e-07	5.87716e-05
Smp_042120	45.5775	41.2874	62.3881	73.812	111.911	97.5969	109.608	82.0402	0.846701	5e-05	0.0017469	75.631	62.647	80.0817	75.0119	101.107	94.3316	108.543	79.6346	0.456918	0.000224082	0.00995857	46.8599	36.1172	50.6819	42.1322	60.0849	55.2296	62.0631	40.6285	0.635209	0.000423283	0.00935219	GO:0007218,GO:0016020,GO:0016021	hypothetical protein;Smp_042120	NPP-1 prepropeptide; Putative neuropeptide [Source:UniProtKB/TrEMBL;Acc:C4Q8P7]	_	_
SmVG_001147	12.2566	13.1128	23.3238	16.8307	25.2148	29.8467	34.0637	28.6166	0.845532	5e-05	0.0017469	22.5137	19.4886	33.3449	20.4602	44.6158	43.484	39.8757	22.4819	0.617775	9.81526e-05	0.00546223	13.9407	12.0216	19.6464	12.3605	26.719	26.8568	23.7515	11.5642	0.891643	1.3302e-05	0.000683455
SmVG_019168	10.4152	10.0196	14.701	20.7966	30.5967	23.3912	25.1918	20.8719	0.838988	5e-05	0.0017469	18.342	17.2961	23.2158	26.6721	34.3824	31.4957	34.3296	28.4264	0.586804	0.00107053	0.0282561	10.8395	9.6103	14.1894	14.3392	19.8666	18.1558	19.0935	14.0552	0.802039	0.00015028	0.00435336
Smp_153710	1.33885	1.45014	1.88192	1.45653	2.82411	2.45844	2.71016	2.89368	0.829168	5e-05	0.0017469	5.23519	4.60707	5.45925	4.21944	6.09815	7.38619	6.01845	4.14785	0.339107	0.00171253	0.0378323	3.11239	2.58508	3.32125	2.24763	3.44361	4.16037	3.28278	2.006	0.47192	0.00103055	0.0175627	GO:0000710,GO:0000795,GO:0003684,GO:0005524,GO:0006298,GO:0030983,GO:0032300,GO:0051026	mutS protein 5;Smp_153710	Putative uncharacterized protein [Source:UniProtKB/TrEMBL;Acc:G4LX68]	gi|284813531|ref|NP_002430.3|	DNA mismatch repair protein Msh3 [Homo sapiens]
SmVG_006198	13.8038	12.3785	18.6477	19.7264	32.8253	26.2418	28.6504	25.6942	0.81294	5e-05	0.0017469	5.71936	6.25176	7.18978	5.63543	10.958	9.62417	8.6268	7.56862	0.553474	6.72484e-07	0.000111181	5.89451	5.81461	8.34888	5.92895	9.59346	9.91987	9.37044	7.14073	0.763406	6.60247e-06	0.000393775
SmVG_024667	12.4653	10.6888	18.4339	19.12	28.9321	26.3677	28.1823	23.0065	0.81074	5e-05	0.0017469	9.35778	9.55446	13.67	10.7852	16.882	16.1209	16.0299	11.0724	0.492606	0.000339365	0.0132142	4.9686	5.39014	8.07195	6.37472	11.2024	9.55863	9.11643	6.82515	0.837361	0.000139014	0.00417271
SmVG_024710	7.478	7.23085	10.0831	9.90024	13.1104	14.0243	16.0009	16.8188	0.789256	0.00065	0.0145749	10.2551	9.15295	10.8653	9.99882	15.9433	18.6973	15.1832	9.44762	0.532402	0.000286599	0.0117796	7.47489	6.50147	7.84621	6.65884	10.9398	12.544	11.0055	5.31178	0.744126	0.000128758	0.00399633
Smp_190720	2.06819	2.24171	3.17372	3.14206	4.70371	4.14293	4.41089	4.93629	0.775894	0.00015	0.00443311	4.12218	3.77837	4.81508	4.34528	6.33996	7.53551	6.64486	4.40669	0.527438	1.25111e-05	0.0012104	3.92762	3.27014	4.21555	3.39678	5.35806	5.99222	5.14105	2.98116	0.664243	9.70782e-06	0.000533638	GO:0000166,GO:0004812,GO:0004815,GO:0005524,GO:0005737,GO:0006418,GO:0016874	aspartyl tRNA synthetase;Smp_190720
Smp_201810	4.0584	3.65507	5.3852	6.76649	9.5918	7.83178	9.01575	7.57374	0.775849	0.0001	0.00315175	7.87921	7.16401	9.87266	9.70724	13.4896	12.8749	14.2293	10.7727	0.56195	0.000178039	0.00882645	6.71633	6.03428	8.4049	7.53244	10.5294	9.89868	10.9474	7.01759	0.703736	9.07216e-05	0.00307745		hypothetical protein;Smp_201810	Putative uncharacterized protein Smp_201810 [Source:UniProtKB/TrEMBL;Acc:G4VD12]	_	_
Smp_140560	9.58108	10.1055	13.1766	9.50037	13.3403	16.927	25.3299	16.1041	0.759174	0.00035	0.00891215	21.6303	18.1151	22.2418	11.9893	28.7937	25.9136	30.8855	13.9177	0.454796	0.00200797	0.0411978	13.2168	10.3752	13.9582	6.60527	16.8685	15.1999	17.8465	7.41773	0.659874	0.00189182	0.0267227	GO:0016020,GO:0016021	TLC domain containing protein 2;Smp_140560	Putative uncharacterized protein [Source:UniProtKB/TrEMBL;Acc:G4V9U1]	gi|19923999|ref|NP_612472.1|	TLC domain-containing protein 1 isoform 1 [Homo sapiens]
Smp_158740	35.0298	35.0957	33.0046	50.5633	70.9182	63.4075	64.2935	61.4327	0.758745	5e-05	0.0017469	41.4123	35.6263	33.4537	39.7374	58.0325	57.8998	52.7057	42.6599	0.504152	3.16011e-09	8.64016e-07	24.9171	19.9555	20.6193	21.223	32.9264	32.3805	28.9206	20.9194	0.701651	7.74745e-08	9.18123e-06		hypothetical protein;note=predicted by EVM2;Smp_158740	Putative uncharacterized protein [Source:UniProtKB/TrEMBL;Acc:G4VQB9]	_	_
SmVG_001313	35.5558	33.6708	56.6355	40.5211	62.6426	69.7094	84.7258	58.0568	0.725629	5e-05	0.0017469	81.5213	76.2923	117.141	78.0032	144.069	127.265	147.623	87.0161	0.530029	0.000256012	0.0108522	44.6638	38.803	67.0226	36.6978	75.7497	68.0488	78.6075	39.53	0.767655	4.27323e-05	0.00174077
Smp_199840	32.5034	35.2026	48.6171	36.9957	52.4598	64.1174	56.1869	80.662	0.725031	0.00195	0.0306759	37.6974	33.9227	49.9026	35.4162	60.412	69.2888	59.7942	28.3262	0.480847	0.00214347	0.0427723	36.7086	30.4402	46.2892	29.0675	63.8622	75.0198	51.9334	26.0611	0.88621	6.00922e-05	0.00225655		nucleolar protein c7b;Smp_199840	Nucleolar protein c7b, putative [Source:UniProtKB/TrEMBL;Acc:G4M235]	_	_
SmVG_001163	201.303	205.951	306.921	200.036	322.467	359.752	497.454	320.813	0.714832	0.0001	0.00315175	442.037	393.243	714.221	403.824	799.846	692.741	920.225	533.42	0.618981	0.000771159	0.0221942	699.541	596.218	1028.18	614.292	1056.8	941.345	1172.71	647.835	0.707295	0.000192036	0.00526224
Smp_118570	308.837	265.825	350.908	443.702	588.041	537.141	558.307	550.947	0.706503	5e-05	0.0017469	198.07	191.622	218.668	211.906	315.975	316.68	293.684	214.25	0.494384	1.70805e-07	3.58035e-05	206.911	189.854	219.04	204.415	298.46	302.97	274.598	182.722	0.654194	3.91686e-06	0.000277065		hypothetical protein;note=trans_spliced (SO:0000870);note=predicted by EVM2;Smp_118570	Putative uncharacterized protein [Source:UniProtKB/TrEMBL;Acc:G4LY97]	_	_
Smp_193150	66.7111	51.4679	97.6875	88.2778	133.745	116.813	132.784	112.473	0.705047	0.00015	0.00443311	137.486	141.047	179.387	148.147	210.31	204.053	214.211	148.814	0.435501	0.000437648	0.0155489	82.5671	80.5692	110.551	82.9027	123.496	120.756	122.896	77.6669	0.596722	0.000250079	0.00637422		hypothetical protein;Smp_193150	Putative uncharacterized protein [Source:UniProtKB/TrEMBL;Acc:G4VB29]	_	_
Smp_165300	77.2837	52.6179	74.0553	102.07	138.459	106.526	110.942	141.823	0.70176	0.0007	0.0153523	31.4215	58.6025	55.8314	48.8796	82.1658	97.7266	60.8723	56.1224	0.618076	0.00268565	0.0492382	57.654	76.0365	76.8293	77.6942	107.192	135.203	88.9076	58.7568	0.698706	0.001876	0.0266328		hypothetical protein;Smp_165300
SmVG_007097	17.5058	15.7669	22.3166	19.6605	27.1789	30.9859	36.0968	28.1002	0.701394	0.0002	0.0055642	10.9161	10.8826	14.4482	10.7077	18.2935	17.2195	19.2062	10.8951	0.490612	0.000124893	0.00662775	9.76084	9.44438	13.4787	8.72955	17.1011	15.5002	15.9142	8.95535	0.741477	3.74084e-05	0.00154458
Smp_124940	46.2101	39.7078	62.9389	56.6587	82.8944	80.6736	89.5212	80.3133	0.698018	5e-05	0.0017469	89.0655	92.1571	105.494	80.638	123.617	121.037	121.847	90.6666	0.403591	3.88134e-05	0.00292309	55.2544	53.7676	67.0395	45.7232	73.6765	71.55	70.5939	47.6775	0.55506	9.51625e-05	0.00319249	GO:0009055,GO:0046872,GO:0051536,GO:0051537	adrenodoxin protein%2C mitochondrial like;Smp_124940	Adrenodoxin, putative [Source:UniProtKB/TrEMBL;Acc:G4LZ25]	_	_
SmVG_011745	12.6741	11.9407	20.0829	13.9082	18.433	23.5607	27.9305	23.9873	0.680257	0.0003	0.00788397	15.368	15.8657	18.7921	12.3669	22.0817	24.3768	21.468	12.203	0.400315	0.00157381	0.0359887	12.3723	12.0291	14.9717	9.29998	17.3751	18.6297	16.4144	8.23753	0.565044	0.000977073	0.016854
SmVG_000581	51.9028	41.0016	58.3409	67.4402	97.052	74.5245	93.6686	82.5164	0.669241	5e-05	0.0017469	31.3343	35.551	42.6598	35.9436	51.827	56.7389	55.9627	45.5184	0.550642	5.67378e-05	0.00362229	25.3324	24.8662	33.193	27.501	37.3142	39.8943	39.351	27.7502	0.666521	0.000205677	0.00557614
Smp_201210	78.8337	79.7449	109.848	78.025	135.184	120.123	171.493	116.85	0.650028	0.00025	0.00680816	94.6211	89.3219	122.831	70.1731	140.49	126.517	170.997	93.2537	0.53247	0.000282865	0.0117403	60.4353	53.4763	81.979	41.2805	87.6341	79.0666	103.688	50.6527	0.747561	0.000220653	0.00584363		hypothetical protein;Smp_201210
Smp_179010	27.1279	22.7929	34.9425	32.9631	43.7301	44.46	52.9034	42.5155	0.639974	0.0002	0.0055642	65.192	61.413	77.6948	61.0938	90.6466	88.6306	92.3132	63.2681	0.402182	4.43412e-05	0.003088	39.1554	34.4269	47.3702	33.1356	51.744	50.4807	51.1672	31.3563	0.559189	8.53819e-05	0.00292898	GO:0000176,GO:0000177,GO:0000467,GO:0004527,GO:0017091,GO:0034427,GO:0034473,GO:0034475,GO:0034476,GO:0043928,GO:0071028,GO:0071035,GO:0071038,GO:0071042	exosome complex component RRP42;Smp_179010	Putative exosome complex exonuclease rrp42 (Ribosomal rna processing protein 42) [Source:UniProtKB/TrEMBL;Acc:G4VDF0]	gi|189083688|ref|NP_055819.2|	exosome complex component RRP42 [Homo sapiens]
Smp_002820	48.042	44.3939	48.9032	69.726	72.4462	89.1094	85.011	82.1554	0.639181	5e-05	0.0017469	78.8855	73.5029	70.5997	80.5966	113.412	110.226	95.4571	63.1864	0.372265	1.02424e-05	0.00107349	46.5038	40.5855	42.5012	42.8999	63.6723	61.5798	52.0932	30.6895	0.515061	0.000244788	0.00632774	GO:0003676,GO:0008270,GO:0046872	zinc finger CCCH domain containing protein 4;Smp_002820.3	Putative uncharacterized protein [Source:UniProtKB/TrEMBL;Acc:G4VLJ5]	_	_
Smp_148590	2.40802	1.86739	2.43194	2.90149	5.43961	2.8687	3.82595	2.80423	0.636601	0.00375	0.0472762	3.75791	4.03429	4.27696	4.16788	5.31969	5.54742	6.10653	5.599	0.493406	0.000601682	0.0189184	2.29019	2.27677	2.54039	2.23104	2.96348	3.0818	3.32044	2.70232	0.699111	0.000817856	0.0147781		hypothetical protein;Smp_148590	Putative uncharacterized protein [Source:UniProtKB/TrEMBL;Acc:G4V8Z2]	_	_
SmVG_011954	20.3185	17.1415	20.0475	27.7098	34.5561	30.8626	33.2568	33.7644	0.636119	5e-05	0.0017469	16.1837	17.0091	15.45	17.7962	23.7204	27.019	22.1679	16.3822	0.446887	4.06582e-06	0.00048825	11.2114	11.0978	11.2669	11.3293	15.7752	17.749	14.9866	9.89126	0.627559	1.25643e-05	0.000655136
SmVG_016752	10.7892	9.85834	9.68817	14.12	16.1178	16.6271	17.5041	18.7277	0.633739	0.0007	0.0153523	35.2049	36.6985	36.5576	42.3797	55.3974	69.1724	45.6916	37.2041	0.465494	9.28085e-05	0.00521095	40.1397	40.9034	41.9819	42.5408	57.1886	71.5407	47.9799	34.227	0.601193	8.72696e-05	0.00298253
Smp_076710	24.5042	24.4354	29.0518	38.745	49.4174	43.3578	43.5181	43.8752	0.626092	0.00025	0.00680816	58.3002	53.6306	54.7053	66.2675	75.5384	81.8357	71.9264	61.0378	0.396689	0.000521187	0.0169946	34.7058	31.037	34.0074	36.6866	44.3303	47.4526	41.1773	32.004	0.542985	0.000814371	0.0147443	GO:0008270	hypothetical protein;Smp_076710
Smp_092390	6.46918	4.73079	6.99303	6.04053	10.1699	7.70075	9.37997	10.0795	0.623334	0.0022	0.033498	9.36824	9.83619	9.82032	7.31913	12.5028	15.5507	11.7508	8.54755	0.437837	0.000526472	0.0170656	5.67541	5.5823	5.93796	3.98624	7.0452	8.74206	6.36729	4.18133	0.607902	0.000178512	0.00505876		N acetylglucosamine kinase;Smp_092390	Putative uncharacterized protein [Source:UniProtKB/TrEMBL;Acc:G4VHY4]	gi|295844834|ref|NP_060037.3|	N-acetyl-D-glucosamine kinase [Homo sapiens]
SmVG_008483	14.4795	14.3302	23.1625	16.1587	25.3633	23.9903	32.4499	23.0571	0.622091	0.00025	0.00680816	16.3791	14.701	22.8996	13.6439	23.7758	23.0663	28.029	16.9766	0.479511	0.00102519	0.027388	10.5292	8.98929	14.8729	7.74546	14.1106	13.843	16.2804	8.60281	0.620528	0.0012012	0.0194688
Smp_202620	19.2397	20.4329	19.5425	33.7017	44.8905	33.5356	32.4857	30.3137	0.603988	0.002	0.0312986	57.3689	53.4298	58.8377	70.0742	90.2007	83.7907	79.4764	77.2324	0.508617	0.000496586	0.0166164	59.0805	55.1335	59.2761	63.6874	88.9489	81.2607	83.0326	65.7695	0.715933	2.70561e-05	0.00121619	GO:0016020,GO:0016021	hypothetical protein;note=tmhmm%3B%3Bquery 1-52%3B;note=%3Bquery 1-12%3B;note=%3Bquery 13-35%3B;note=%3Bquery 36-52%3B;Smp_202620
SmVG_008470	5.89055	5.92336	7.44988	8.94897	11.6804	11.462	9.00567	10.7283	0.603835	0.00145	0.0248013	13.2346	13.4219	12.9667	14.2108	20.6971	20.5615	15.8011	13.7268	0.426409	8.489e-05	0.00494287	8.68596	8.08366	9.02972	8.18553	12.7331	13.0006	9.68857	7.4921	0.599704	6.04478e-05	0.00225693
SmVG_012423	143.778	129.567	165.587	174.332	241.044	219.676	244.335	226.69	0.603428	5e-05	0.0017469	93.051	86.9847	110.005	88.3981	140.291	139.669	129.875	93.2286	0.460913	1.03769e-06	0.00015537	94.0303	87.0739	110.071	82.7836	129.102	133.196	120.043	76.5145	0.572006	7.91509e-06	0.000448603
SmVG_015953	11.4934	12.9999	15.0284	18.0348	24.0267	24.8857	17.4587	20.3941	0.592138	0.00145	0.0248013	15.1555	9.90242	12.68	14.4668	20.8155	18.7706	17.2921	14.4762	0.489067	0.000222343	0.00995857	15.0896	11.3779	13.6693	13.6517	20.4773	18.8636	16.6705	12.8109	0.616242	0.000156871	0.00452989
SmVG_012143	4.58361	4.2352	4.54937	5.54037	5.71142	8.33055	6.6677	7.77529	0.591161	5e-05	0.0017469	2.11981	1.87115	1.83283	1.91548	3.13883	3.04264	2.21402	1.44515	0.358192	0.00224887	0.0437508	2.43597	2.06126	2.14993	2.03511	3.4974	3.29653	2.50585	1.37003	0.516863	0.0015515	0.0233621
SmVG_001063	9.71204	7.37285	9.18512	14.8718	19.4867	14.2228	15.1139	13.0047	0.587657	0.0037	0.0469083	61.2063	67.4417	68.0714	69.9891	87.2393	89.4556	88.6287	72.0239	0.404578	0.000292094	0.0119275	36.6764	37.8955	41.3851	37.6153	49.8241	50.3147	48.7731	35.2816	0.560469	0.00016992	0.00484536
Smp_208070	35.5229	31.7483	44.0157	40.7671	57.1528	53.5861	63.0785	53.7274	0.581566	0.00055	0.012615	35.5941	35.826	43.8511	33.4192	51.5164	50.8978	51.1887	35.3327	0.406351	3.94958e-05	0.00293528	25.9527	24.0678	31.2819	21.9608	33.6474	34.7846	34.3482	21.5168	0.541621	0.000107151	0.00348607	GO:0005515,GO:0051301	CDC16 cell division cycle 16;Smp_208070	Putative cell division cycle [Source:UniProtKB/TrEMBL;Acc:G4VEL2]	_	_
Smp_013360	22.4244	18.0914	21.0094	30.3551	37.2146	32.3866	34.1208	32.611	0.569309	0.0022	0.033498	34.1451	38.2602	36.7919	42.4934	53.1127	54.3746	51.5367	38.3894	0.421449	0.000187324	0.00909481	19.9488	20.9763	21.913	22.3223	29.5022	30.0964	27.8083	18.3449	0.573606	0.000174557	0.00496209	GO:0000166,GO:0000243,GO:0000398,GO:0003676,GO:0003729,GO:0005685,GO:0019013,GO:0030529,GO:0030619,GO:0071004,GO:0071011	u1 small nuclear ribonucleoprotein 70 kDa;Smp_013360	Putative u1 small nuclear ribonucleoprotein 70 kD [Source:UniProtKB/TrEMBL;Acc:G4VEH2]	gi|29568103|ref|NP_003080.2|	U1 small nuclear ribonucleoprotein 70 kDa [Homo sapiens]
Smp_120390	2661.31	2931.93	3750.11	3564.58	4239.3	4953.12	5689.71	4244.55	0.567328	0.00125	0.0226255	3682.24	3213.61	4836.28	3546.52	5929.02	4913	5877.25	3395.36	0.460456	0.00140679	0.0335099	4914.32	3786.66	5378.94	3737.84	5941.47	5276.62	6390.75	3325.52	0.547027	0.000925651	0.0161502	GO:0016020,GO:0016021	hypothetical protein;Smp_120390	Putative uncharacterized protein [Source:UniProtKB/TrEMBL;Acc:C4QU61]	_	_
Smp_085080	42.2852	42.6171	47.9127	43.206	58.9031	62.1571	74.7625	64.1457	0.562588	5e-05	0.0017469	63.2404	55.1689	56.6115	43.3054	69.5965	72.8175	73.4408	42.9733	0.32709	0.000166109	0.00839015	37.6127	30.8436	34.853	23.5103	40.1224	41.7925	41.0475	21.3976	0.465839	0.000120858	0.00379089	GO:0007165,GO:0008603,GO:0030041,GO:0044782	hypothetical protein;note=predicted by EVM2;Smp_085080	Putative uncharacterized protein [Source:UniProtKB/TrEMBL;Acc:G4VER9]	gi|38348396|ref|NP_940961.1|	hypothetical protein LOC375307 [Homo sapiens]
Smp_080370	642.376	577.361	741.422	842.812	1143.72	930.37	1104.73	936.738	0.553617	0.00055	0.012615	763.654	751.703	833.635	791.595	980.951	1013.63	1014.31	810.583	0.377081	0.000331877	0.0131673	450.543	417.504	506.095	428.226	563.22	577.021	566.073	404.087	0.521375	0.00045607	0.00974622	GO:0003700,GO:0006355,GO:0043565	hypothetical protein;Smp_080370	Putative uncharacterized protein [Source:UniProtKB/TrEMBL;Acc:G4VTP3]	_	_
Smp_126690	5.35987	5.33417	6.39171	4.58055	6.8014	8.09741	8.9221	7.95445	0.552456	0.00015	0.00443311	6.85486	6.11074	7.0148	4.07827	7.99821	8.22661	8.01306	4.37301	0.325815	0.00234611	0.0447962	4.30416	3.64303	4.42801	2.36277	4.86173	4.88355	4.64166	2.26919	0.449625	0.00285382	0.0345373	GO:0005515,GO:0008180,GO:0010388	COP9 signalosome complex subunit 6;note=pfam_scan%3BPfam:PF01398.16%3B%3BE()%3D3.7E-16%3Bscore%3D58.7%3Bqu ery 20-114%3Bdescription%3DJAB;note=pfam_scan%3BPfam:PF13012.1%3B%3BE()%3D3.2E-14%3Bscore%3D52.8%3Bque ry 170-282%3Bdescription%3DMitMem_reg;note=iprscan%3BInterPro:IPR000555 : Mov34/MPN/PAD-1%3BPfam:PF01398%3B%3Bscore%3D2.2E-18%3Bquery 16-127%3Bdescription%3DMov34/MPN/PAD-1;note=iprscan%3BI…	COP9 signalosome subunit 6 (M67 family) [Source:UniProtKB/TrEMBL;Acc:G4V7G0]	gi|34147637|ref|NP_006824.2|	COP9 signalosome complex subunit 6 [Homo sapiens]
SmVG_019103	4.24009	4.52572	6.21533	3.98083	5.10396	7.4883	8.805	6.4063	0.552161	0.0018	0.0288192	8.85237	8.28161	10.787	7.27761	14.8566	13.5812	15.6037	8.32332	0.54261	2.38046e-06	0.000304364	6.94124	6.04168	9.03538	5.56486	11.3269	10.6605	11.4683	5.66845	0.774551	1.70636e-06	0.000137792
SmVG_023149	24.4465	17.6622	22.597	30.1534	42.114	29.1585	34.5299	32.4215	0.543147	0.00035	0.00891215	25.4672	29.8067	30.5429	31.8001	36.9812	40.2758	37.194	31.8485	0.383813	0.00238059	0.0452277	17.5831	18.7336	20.8547	18.6347	23.7374	25.6009	23.3958	17.1848	0.532926	0.000358376	0.00839059
Smp_022730	42.8223	40.4467	61.374	49.2709	63.9893	67.9639	77.1104	71.6318	0.533589	0.00045	0.010904	56.8551	49.6687	70.8977	47.2813	74.0537	79.4034	76.5119	43.5019	0.352585	0.00224018	0.0437496	33.6825	27.9778	43.2661	25.8596	42.7484	45.4386	43.0271	21.8963	0.491827	0.00159291	0.0237121		H:ACA ribonucleoprotein complex subunit;Smp_022730	Putative nucleolar protein family A member 1 (Snornp protein gar1) [Source:UniProtKB/TrEMBL;Acc:G4VEC3]	_	_
Smp_179160	164.527	176.539	205.831	217.94	287.49	236.025	315.603	266.099	0.531108	0.0039	0.0483557	141.408	142.94	184.942	134.439	190.18	200.098	203.772	151.965	0.412803	0.00120024	0.0303742	194.116	158.213	210.957	156.197	192.309	211.023	227.815	149.749	0.467459	0.00400709	0.0426162		nuclear DNA binding protein;Smp_179160	Putative uncharacterized protein [Source:UniProtKB/TrEMBL;Acc:G4M1F7]	_	_
Smp_058780	22.0247	19.2492	25.4302	25.8693	31.0199	33.9331	36.6826	31.7439	0.526867	0.0034	0.0451364	43.1335	46.0776	48.875	45.3232	56.8389	61.1668	56.679	36.5807	0.290277	0.00101963	0.0273431	23.5932	23.6877	28.4051	23.1008	31.1132	33.0735	29.9923	17.2094	0.428273	0.00193513	0.0269589		leukocyte receptor cluster;Smp_058780	Putative uncharacterized protein [Source:UniProtKB/TrEMBL;Acc:G4VQN9]	_	_
Smp_158650	54.7265	47.2361	70.5943	74.2924	102.325	80.4896	98.4432	73.8648	0.524687	0.0005	0.011737	102.235	96.7954	117.272	85.1015	121.617	114.661	121.123	97.6821	0.309866	0.00177958	0.0386027	61.6943	55.3992	72.6299	46.8192	71.3923	66.6419	68.4827	49.3059	0.43354	0.00194661	0.0269951		hypothetical protein;Smp_158650	Putative uncharacterized protein [Source:UniProtKB/TrEMBL;Acc:G4LZ87]	_	_
Smp_076660	35.2563	32.3263	39.2498	44.7512	60.6683	50.0561	56.4814	50.4654	0.522037	0.00095	0.0189874	45.288	43.1702	45.4754	41.989	53.538	55.1209	53.6517	40.8793	0.306458	0.000458464	0.0160169	26.622	23.8952	26.8787	22.01	29.846	30.2241	28.6944	19.2116	0.421463	0.000453049	0.00973787	GO:0003677,GO:0003887,GO:0006260,GO:0071897	DNA polymerase delta small subunit;Smp_076660	Putative DNA polymerase delta small subunit [Source:UniProtKB/TrEMBL;Acc:G4V7L5]	gi|187828568|ref|NP_001120690.1|	DNA polymerase delta subunit 2 [Homo sapiens]
Smp_015850	86.583	68.7914	100.824	117.319	141.92	127.171	134.281	129.657	0.513042	0.00015	0.00443311	115.496	124.217	136.374	133.453	162.629	167.277	152.117	122.277	0.339748	0.00176997	0.0385136	66.0461	66.6624	79.7153	68.6546	88.8707	90.9955	80.5602	57.4374	0.458774	0.00164831	0.0241039		hypothetical protein;Smp_015850.3	Putative uncharacterized protein [Source:UniProtKB/TrEMBL;Acc:G4VSN4]	gi|116812577|ref|NP_057103.2|	putative RNA-binding protein Luc7-like 2 [Homo sapiens]
Smp_071640	79.64	74.2359	108.237	94.7	122.625	123.746	136.17	122.392	0.500927	0.0006	0.0136576	139.906	134.469	170.148	121.614	179.282	185.711	181.99	125.205	0.333049	0.000200905	0.00944489	81.519	73.5572	101.198	63.8749	99.7454	102.687	97.7331	59.6412	0.457903	0.000899483	0.0158495	GO:0000166,GO:0003676	arginine:serine rich splicing factor;Smp_071640	Putative arginine/serine-rich splicing factor [Source:UniProtKB/TrEMBL;Acc:G4VRU1]	gi|72534660|ref|NP_001026854.1|	serine/arginine-rich splicing factor 7 isoform 1 [Homo sapiens]
Smp_129090	162.01	152.211	160.438	182.039	221.367	249.887	248.825	207.698	0.498547	0.0013	0.023022	168.53	153.848	147.073	134.82	211.73	184.8	190.228	122.994	0.336688	0.000587726	0.0186784	107.491	93.008	97.6166	80.3936	133.144	115.136	116.078	68.4576	0.479124	0.000190471	0.00526224		hypothetical protein;Smp_129090	Putative uncharacterized protein [Source:UniProtKB/TrEMBL;Acc:G4V9I6]	_	_
Smp_170030	29.7919	25.3389	38.2437	30.6628	34.8968	44.5688	52.2133	43.057	0.494403	0.00085	0.0173346	42.5926	46.3815	54.0651	39.4757	62.8875	65.5412	63.3854	33.7979	0.353782	0.00176484	0.0384686	27.2031	27.7978	34.1987	23.049	38.2012	38.4449	36.5762	17.9387	0.492745	0.000877744	0.0156129	GO:0005623,GO:0009055,GO:0015035,GO:0045454,GO:0055114	sh3 domain binding glutamic acid rich;Smp_170030	Sh3 domain-binding glutamic acid-rich-like protein [Source:UniProtKB/TrEMBL;Acc:G4VTS1]	_	_
Smp_093100	73.2702	60.5009	91.5413	86.9584	112.012	109.344	109.578	106.199	0.485274	0.0008	0.0165775	119.838	119.133	139.477	111.151	147.606	154.946	140.612	104.263	0.270855	0.00142721	0.0336344	71.989	67.3166	86.3549	61.3149	86.365	89.9965	79.8828	52.641	0.370721	0.00351939	0.0389915	GO:0000166,GO:0000398,GO:0003676,GO:0003723,GO:0005634,GO:0008270,GO:0046872,GO:0089701	splicing factor u2af 35 kda subunit;Smp_093100	Putative u2 snRNP auxiliary factor, small subunit; U2 snRNP auxiliary factor small subunit-like protein [Source:UniProtKB/TrEMBL;Acc:Q15ES3]	gi|94536809|ref|NP_001035515.1|	splicing factor U2AF 26 kDa subunit isoform 1 [Homo sapiens]
SmVG_015869:Smp_042420	3.80072	3.58574	5.17897	3.80995	6.21341	5.29901	6.83409	4.56002	0.484231	0.00405	0.049669	5.18102	4.90613	6.28545	4.11013	6.72889	6.31659	7.51315	4.32102	0.348301	0.00182105	0.0392616	3.20967	2.87487	3.82415	2.31657	3.93716	3.73814	4.1951	2.14402	0.483618	0.00221407	0.0295107		histone H4 transcription factor;Smp_042420	Putative zinc finger protein [Source:UniProtKB/TrEMBL;Acc:G4VJE9]	_	_
SmVG_015869:Smp_042430	3.80072	3.58574	5.17897	3.80995	6.21341	5.29901	6.83409	4.56002	0.484231	0.00405	0.049669	5.18102	4.90613	6.28545	4.11013	6.72889	6.31659	7.51315	4.32102	0.348301	0.00182105	0.0392616	3.20967	2.87487	3.82415	2.31657	3.93716	3.73814	4.1951	2.14402	0.483618	0.00221407	0.0295107		dna replication complex gins protein sld5;Smp_042430	Putative uncharacterized protein [Source:UniProtKB/TrEMBL;Acc:G4VJF0]	gi|14150122|ref|NP_115712.1|	DNA replication complex GINS protein SLD5 [Homo sapiens]
SmVG_015869:Smp_042430.2	3.80072	3.58574	5.17897	3.80995	6.21341	5.29901	6.83409	4.56002	0.484231	0.00405	0.049669	5.18102	4.90613	6.28545	4.11013	6.72889	6.31659	7.51315	4.32102	0.348301	0.00182105	0.0392616	3.20967	2.87487	3.82415	2.31657	3.93716	3.73814	4.1951	2.14402	0.483618	0.00221407	0.0295107		dna replication complex gins protein sld5;Smp_042430.2
SmVG_002177	14.1476	13.1196	13.3135	16.7297	21.0792	20.1377	19.4758	19.4647	0.484039	0.00115	0.0213294	17.4417	16.6498	15.2895	15.4054	20.7603	20.9965	18.4208	14.4366	0.294943	0.000474894	0.0162303	10.1417	9.02952	8.96165	8.02156	11.3933	11.5292	9.74535	6.79428	0.417475	0.000130317	0.00403101
Smp_136090	30.8012	27.6627	38.3148	34.7183	47.4325	41.8067	51.493	42.3855	0.477743	0.00115	0.0213294	41.2043	39.5338	45.0428	37.0735	47.3563	48.9866	49.0646	35.8315	0.267719	0.00158057	0.0359935	24.3552	21.7925	26.8415	19.5941	26.4086	27.2326	26.6107	17.3593	0.370657	0.00222179	0.0295107	GO:0000463,GO:0002181,GO:0003735,GO:0005840,GO:0022625,GO:0044822	hypothetical protein;note=pfam_scan%3BPfam:PF00327.15%3B%3BE()%3D2.9E-8%3Bscore%3D33.0%3Bque ry 357-391%3Bdescription%3DRibosomal_L30;note=iprscan%3BInterPro:IPR000517 : Ribosomal protein L30%3BPfam:PF00327%3B%3Bscore%3D2.1E-7%3Bquery 339-391%3Bdescription%3DRibosomal protein L30p/L7e%2C conserved region;Smp_136090	Putative 60s ribosomal protein L7 [Source:UniProtKB/TrEMBL;Acc:G4VAX7]	gi|50053872|ref|NP_940888.2|	60S ribosomal protein L7-like 1 [Homo sapiens]
SmVG_012638	49.414	44.6422	55.9606	60.9854	79.203	66.2734	72.7514	73.4492	0.467114	0.0013	0.023022	76.0015	74.5115	79.0179	70.7888	88.3646	99.2189	85.4369	70.8118	0.298233	0.000353621	0.0135594	44.2686	40.6301	46.8331	36.9664	48.4988	54.1932	45.3887	33.378	0.412224	0.000513388	0.0105749	GO:0005515
Smp_031920	37.1578	30.7266	38.018	50.1276	60.0845	51.1684	51.7328	52.3945	0.465062	0.00145	0.0248013	45.5135	49.3701	50.5294	52.1915	62.3868	66.243	56.522	47.9731	0.322118	0.0011397	0.0293166	26.41	26.8047	29.963	27.3212	34.5287	36.6028	30.3945	22.8594	0.435674	0.00277987	0.033856	GO:0003729,GO:0005685,GO:0006376,GO:0016020,GO:0016021	hypothetical protein;Smp_031920.5	Putative uncharacterized protein [Source:UniProtKB/TrEMBL;Acc:C4Q5Y3]	gi|116812577|ref|NP_057103.2|	putative RNA-binding protein Luc7-like 2 [Homo sapiens]
Smp_056900	105.326	85.6354	113.184	141.831	169.654	136.839	151.027	155.001	0.457792	0.0015	0.0253677	146.297	157.12	151.905	157.661	177.856	211.627	166.24	146.198	0.304807	0.00170939	0.0378323	90.6356	92.3485	97.7475	90.9744	108.217	127.784	97.8466	78.3057	0.419267	0.00262285	0.0327187	GO:0000176,GO:0000177,GO:0005730,GO:0016075,GO:0031125,GO:0034427,GO:0034475,GO:0071028,GO:0071051	ribonuclease PH;Smp_056900	Ribonuclease pH related [Source:UniProtKB/TrEMBL;Acc:G4M1E0]	_	_
Smp_176910	34.9929	30.1592	41.818	39.3156	52.4094	50.3639	47.4718	50.4485	0.456207	0.00105	0.0201806	32.0712	32.7081	37.6092	28.5997	43.0479	44.5158	35.8872	28.7735	0.304881	0.000249385	0.0107415	18.8852	17.9627	22.4794	15.2559	24.0692	24.6842	19.3401	13.8003	0.416823	0.000603671	0.0118036		hypothetical protein;Smp_176910	Putative uncharacterized protein [Source:UniProtKB/TrEMBL;Acc:G4VGH4]	_	_
Smp_125730	39.7943	40.6373	43.6918	46.8911	59.3983	56.6093	58.1871	60.2613	0.455199	0.00135	0.0235831	55.1533	46.5004	46.2682	43.6794	57.6319	62.3325	52.3802	40.631	0.26201	0.0015826	0.0359935	33.9131	26.8172	28.9651	24.5369	34.2512	36.5791	29.9726	21.0325	0.370427	0.000410605	0.00913848	GO:0008270	hypothetical protein;Smp_125730	Putative uncharacterized protein [Source:UniProtKB/TrEMBL;Acc:G4V9X7]	_	_
SmVG_034760	13.5236	12.0485	14.0985	19.5977	20.721	21.2317	18.6395	20.5151	0.452571	0.00195	0.0306759	9.18769	10.3332	10.6142	11.064	17.0216	14.8907	13.4565	11.0394	0.468689	2.32625e-05	0.00192482	11.082	11.0033	12.0387	12.1396	16.3237	15.7117	12.7563	9.31574	0.475547	0.0016409	0.024082	GO:0008270
Smp_067420	78.5962	68.8059	96.7603	79.9011	97.2139	112.126	121.17	111.85	0.448945	0.0023	0.0345537	88.4129	87.2599	104.869	70.2981	115.442	116.716	110.167	64.0955	0.305255	0.00145509	0.0340794	48.8387	45.5746	59.0769	35.1064	61.142	61.4077	56.7748	29.2993	0.425038	0.00297773	0.0354384	GO:0000166,GO:0003676	splicing factor 3b subunit 4;Smp_067420	Splicing factor 3b, subunit 4,putative [Source:UniProtKB/TrEMBL;Acc:G4LZ80]	gi|5032069|ref|NP_005841.1|	splicing factor 3B subunit 4 [Homo sapiens]
Smp_165870	103.883	98.3275	120.46	116.158	146.913	142.24	167.332	141.405	0.446222	0.00235	0.0351875	181.377	163.96	180.716	145.292	193.665	204.821	198.256	135.962	0.261586	0.00192446	0.0404073	109.093	93.1857	112.801	80.9646	114.82	120.001	114.197	70.6462	0.360284	0.00138537	0.0214505	GO:0016020,GO:0016021	Lamino associated polypeptide;note=predicted by EVM2;note=tmhmm%3B%3Bquery 1-255%3B;note=%3Bquery 198-209%3B;note=%3Bquery 178-197%3B;note=%3Bquery 210-232%3B;note=%3Bquery 1-177%3B;note=%3Bquery 233-255%3B;Smp_165870	Putative uncharacterized protein [Source:UniProtKB/TrEMBL;Acc:G4LWE7]	_	_
Smp_094810	44.5432	38.7898	48.642	54.6337	66.4707	58.8175	63.1227	65.3995	0.443734	0.0014	0.0241755	69.6866	70.7632	73.2293	65.6905	82.4015	91.6717	77.0247	60.9924	0.26538	0.001651	0.0372793	41.2451	39.3755	44.0283	35.248	46.7779	51.325	42.1387	29.526	0.363687	0.00205279	0.0279161	GO:0000166,GO:0000413,GO:0003676,GO:0003723,GO:0003755,GO:0005737,GO:0006457,GO:0016853,GO:0042277	peptidyl-prolyl cis-trans isomerase (PPIase) E;Smp_094810	Peptidyl-prolyl cis-trans isomerase E [Source:UniProtKB/Swiss-Prot;Acc:Q26548]	gi|5174637|ref|NP_006103.1|	peptidyl-prolyl cis-trans isomerase E isoform 1 [Homo sapiens]
Smp_141330	90.8578	81.4646	108.574	104.433	135.251	119.477	142.286	124.297	0.436052	0.00225	0.0340294	123.808	123.264	134.159	106.509	136.022	147.254	142.352	105.174	0.251739	0.00239427	0.0454189	72.3668	68.046	80.9423	57.4259	77.4556	83.4262	78.3857	51.4711	0.345441	0.00336989	0.0380102	GO:0000398,GO:0005515,GO:0005686,GO:0030620	u2 small nuclear ribonucleoprotein A';Smp_141330	Putative uncharacterized protein [Source:UniProtKB/TrEMBL;Acc:G4V7P9]	gi|50593002|ref|NP_003081.2|	U2 small nuclear ribonucleoprotein A' [Homo sapiens]
