# Supplementary material for: Pharmacological inhibition of lysine-specific demethylase 1 (LSD1) induces global transcriptional deregulation and ultrastructural alterations that impair viability in Schistosoma mansoni
Source: PLoS Negl Trop Dis. 2020 Jul 1;14(7):e0008332. doi: 10.1371/journal.pntd.0008332 (PMC7329083; doi:10.1371/journal.pntd.0008332)
Supplement: S4 Table — (XLSX) [file pntd.0008332.s012.xlsx]

## Sheet: Female_Down
List of downregulated genes_Female
geneID	fpkm-control_1-cuffquant	fpkm-control_0-cuffquant	fpkm-control_2-cuffquant	fpkm-control_3-cuffquant	fpkm-treated_0-cuffquant	fpkm-treated_2-cuffquant	fpkm-treated_1-cuffquant	fpkm-treated_3-cuffquant	log2(fold_change)-cuffdiff	p-value-cuffdiff	q-value-cuffdiff	tpm-control1-kallisto	tpm-control2-kallisto	tpm-control3-kallisto	tpm-control4-kallisto	tpm-treated1-kallisto	tpm-treated2-kallisto	tpm-treated3-kallisto	tpm-treated4-kallisto	b-sleuth	p-value-sleuth	q-value-sleuth	TPM-control1-sailfish	TPM-control2-sailfish	TPM-control3-sailfish	TPM-control4-sailfish	TPM-treated1-sailfish	TPM-treated2-sailfish	TPM-treated3-sailfish	TPM-treated4-sailfish	log2FC-edgeR	p-value-edgeR	q-value-edgeR	GO_terms	product_description	swissProtAnnotationOfSMansoniGene	humanHomologous-hit	humanHomologous-hitDescription
Smp_164320	64.7182	68.6019	53.7404	51.7303	0.888367	3.38276	1.48371	4.90111	-4.48602	5e-05	0.000268034	76.9494	73.4971	62.3168	66.1364	0.454317	1.41506	3.1967	3.16567	-3.54062	9.97523e-14	3.76217e-12	44.7054	43.3631	35.7988	39.971	0.238792	0.801732	1.65565	1.66716	-4.39837	4.34029e-31	1.24089e-28		hypothetical protein;note=predicted by EVM2;Smp_164320	Putative uncharacterized protein [Source:UniProtKB/TrEMBL;Acc:G4M0E7]	_	_
SmVG_016723	25.5807	24.2781	29.521	20.5045	0.352166	1.7024	1.51596	3.38662	-3.84369	5e-05	0.000268034	26.2368	27.4435	30.4297	24.7059	0.307025	1.75555	1.54985	2.6375	-2.91062	6.50378e-12	1.76598e-10	16.0541	16.861	18.2092	15.3344	0.168356	1.00908	0.842565	1.45739	-3.47968	7.28273e-26	1.24928e-23
Smp_132410	6.31489	8.00687	6.64492	4.21784	0.597908	0	0.331774	0.941993	-3.75014	0.0095	0.0251933	7.50707	5.32533	6.06112	5.03541	0.56413	0.979361	0	1.16777	-2.37072	0.0040581	0.0135846	5.75721	3.94099	3.92733	3.21022	0.245277	0.577107	0	0.692682	-2.53368	2.17721e-09	2.55457e-08	GO:0004930,GO:0007186,GO:0007218,GO:0016020,GO:0016021	neuropeptide receptor;Smp_132410	Putative neuropeptide F-like receptor [Source:UniProtKB/TrEMBL;Acc:G4VGK9]	gi|221316654|ref|NP_004876.2|	neuropeptide FF receptor 2 isoform 1 [Homo sapiens]
SmVG_006871	35.4628	49.6488	33.4722	27.5216	1.41205	2.95267	2.03738	4.90843	-3.69127	5e-05	0.000268034	44.4067	30.32	29.5683	27.2303	2.53908	2.97184	3.11761	4.05645	-2.02924	2.37914e-41	1.54684e-38	25.11	17.2421	16.3542	15.8978	0.859504	1.23126	1.36726	1.73585	-3.00925	2.32185e-39	1.42247e-36	GO:0007155,GO:0016020
SmVG_032580	14.1757	20.775	16.2935	8.95536	0	4.02493	0	0.779398	-3.64735	0.00195	0.00669424	27.726	14.5985	22.1856	11.3671	0	0.610848	2.7847	1.08163	-3.06253	0.000805369	0.00342985	20.759	10.6365	15.5644	10.6019	0	0.367452	1.3253	0.801361	-3.76434	8.28558e-15	2.80891e-13
SmVG_000820	4.7026	3.92789	2.5349	2.11283	0.297049	0.368556	0.162175	0.387874	-3.44926	5e-05	0.000268034	3.37233	3.6798	2.0402	2.01191	0.087836	0.213447	0.208108	0.271284	-2.42187	1.68872e-10	3.56735e-09	2.02547	2.22077	1.20166	1.19791	0.0461183	0.11643	0.229717	0.118509	-2.90338	6.83658e-13	1.68015e-11
Smp_170630	14.8135	18.2923	25.1588	21.4319	0.884536	2.98508	0.816064	2.65029	-3.44146	5e-05	0.000268034	15.3214	11.9919	20.5605	19.7348	0.365225	0.573523	1.69973	1.36321	-2.62545	2.24078e-09	3.7356e-08	9.00675	7.12038	11.9545	12.0155	0.19922	0.314271	0.893474	0.723034	-3.43573	2.98487e-20	2.26559e-18	GO:0005578,GO:0005615,GO:0007155,GO:0030198,GO:0050839	Periostin%2C putative;Smp_170630	_	gi|209862907|ref|NP_006466.2|	periostin isoform 1 [Homo sapiens]
Smp_085180	71.6424	61.4283	76.4822	71.2214	1.7623	12.504	3.31188	11.3413	-3.2793	5e-05	0.000268034	59.1466	67.4894	70.9053	75.544	0.704245	2.65155	7.4754	6.07207	-2.85431	2.01857e-06	1.74858e-05	35.6668	41.0536	42.1114	47.1985	0.367308	1.583	4.01751	3.38789	-3.36755	7.04492e-12	1.39871e-10	GO:0006508,GO:0008234,GO:0016787	cathepsin B (C01 family);Smp_085180	Cathepsin B (C01 family) [Source:UniProtKB/TrEMBL;Acc:G4V7D1]	gi|224586907|ref|NP_055279.3|	tubulointerstitial nephritis antigen [Homo sapiens]
Smp_131410	15.177	12.7017	17.2422	14.8074	0.895421	1.96949	1.37846	1.98125	-3.26718	5e-05	0.000268034	18.8466	22.2904	24.861	23.623	0.868059	1.23418	1.99695	2.29971	-2.38017	3.50815e-27	6.31629e-25	10.9717	12.7948	13.8934	13.811	0.408423	0.756203	1.04816	1.18697	-3.04506	9.39531e-36	4.02918e-33	GO:0016020,GO:0016021	hypothetical protein;note=tmhmm%3B%3Bquery 1-205%3B;Smp_131410	Putative uncharacterized protein [Source:UniProtKB/TrEMBL;Acc:G4VL03]	_	_
SmVG_000936	2.89643	3.15695	2.00822	1.73756	0.686435	0.130359	0.074881	0.213057	-3.14896	5e-05	0.000268034	2.44598	1.64357	1.62397	1.56661	0.141763	0.0412196	0.122298	0.294067	-2.38663	5.50222e-06	4.28141e-05	1.77659	1.31735	1.1131	1.23337	0.105512	0.0970503	0.0665988	0.135256	-2.89945	1.87015e-14	5.94085e-13
SmVG_035093	6.45527	4.72586	3.33927	5.67836	0	1.43795	0.316836	0.686526	-3.04854	5e-05	0.000268034	5.12561	6.158	4.22453	6.19666	0	0.368432	0.756347	0.44005	-2.70024	0.00235498	0.00854584	3.19333	3.51073	2.53566	4.05516	0.115458	0.236293	0.616466	0.24926	-2.66327	2.40461e-13	6.46531e-12
SmVG_007325	0.712083	1.94462	1.28101	0.859701	0	0.313077	0.0881358	0.253969	-2.87229	0.0069	0.0194533	3.50975	2.51768	2.45709	1.69974	0.130017	0.283473	0.168523	0.337324	-2.15322	2.05351e-05	0.000138355	2.23971	1.62399	1.72472	1.41559	0.0701221	0.128724	0.13005	0.175865	-2.97055	2.27036e-14	7.10689e-13
Smp_123880	513.897	421.456	389.687	320.989	35.9319	65.8472	40.3486	84.1791	-2.86264	5e-05	0.000268034	486.047	520.808	429.43	386.302	16.3198	26.7778	41.8153	53.9967	-2.43184	8.11389e-29	1.75846e-26	301.449	326.711	263.563	247.473	9.72378	16.8878	23.8026	30.7192	-3.01027	3.06221e-25	4.86381e-23	GO:0016020,GO:0016021	hypothetical protein;Smp_123880	Putative uncharacterized protein [Source:UniProtKB/TrEMBL;Acc:G4V6W8]	_	_
Smp_137720	586.085	587.573	579.496	504.323	37.849	94.8016	52.9244	125.547	-2.85916	5e-05	0.000268034	1172.26	1167.78	1128.97	1134.22	34.5935	80.9814	135.969	170.135	-2.2966	2.28934e-13	8.06992e-12	829.961	849.957	794.957	857.592	21.3433	56.7661	82.8801	110.06	-2.81556	6.08125e-15	2.13766e-13		hypothetical protein;Smp_137720	Putative uncharacterized protein [Source:UniProtKB/TrEMBL;Acc:G4VBE1]	_	_
Smp_203030	33.7016	23.9075	21.1462	14.5342	1.93061	1.71984	3.16091	6.08485	-2.85477	5e-05	0.000268034	80.4712	103.158	69.0835	55.221	2.32764	6.62503	4.47862	10.3566	-2.55807	1.02664e-34	3.33742e-32	45.8851	59.2385	38.4093	32.1637	1.0584	3.56478	2.24007	5.02796	-3.08111	4.90619e-18	2.75035e-16	GO:0016020,GO:0016021	hypothetical protein;note=tmhmm%3B%3Bquery 1-121%3B;note=%3Bquery 1-32%3B;note=%3Bquery 33-55%3B;note=%3Bquery 56-121%3B;Smp_203030	Putative uncharacterized protein Smp_203030 [Source:UniProtKB/TrEMBL;Acc:G4VME9]	_	_
Smp_055780	48.1226	46.7072	49.2203	41.5565	1.83601	8.41283	4.05096	11.5335	-2.84495	5e-05	0.000268034	44.1416	43.0248	44.7347	42.3466	0.732907	2.68144	4.6637	6.20311	-2.60534	6.99987e-09	1.0543e-07	25.4742	24.9111	25.3603	25.0806	0.38755	1.54811	2.38458	3.17076	-2.96358	4.2739e-12	9.02887e-11	GO:0000166,GO:0005524,GO:0006200,GO:0006810,GO:0006855,GO:0008559,GO:0016020,GO:0016021,GO:0016787,GO:0016887,GO:0017111,GO:0042626,GO:0042908,GO:0055085	smdr2;Smp_055780	Smdr2 [Source:UniProtKB/TrEMBL;Acc:G4VHK5]	gi|21536378|ref|NP_003733.2|	bile salt export pump [Homo sapiens]
Smp_174700	7.53802	8.9631	6.13288	4.51567	0.291962	1.02456	0.59294	1.92053	-2.82552	0.0013	0.00472404	6.96316	5.62185	4.67876	3.91693	0.0959579	0.313974	0.557583	0.919909	-2.62152	5.49905e-10	1.04473e-08	4.15123	3.35639	2.70478	2.41055	0.0652449	0.181877	0.288629	0.482659	-2.83828	3.11908e-12	6.70485e-11	GO:0003677,GO:0003700,GO:0003707,GO:0005634,GO:0006351,GO:0006355,GO:0008270,GO:0043401,GO:0043565,GO:0046872	transcription factor HNF 4;Smp_174700	Putative hepatocyte nuclear factor 4-alpha (Hnf-4-alpha) [Source:UniProtKB/TrEMBL;Acc:G4VL93]	gi|115583654|ref|NP_004124.4|	hepatocyte nuclear factor 4-gamma [Homo sapiens]
Smp_042720	7.72072	9.14915	7.97206	6.2269	0.601521	1.02501	1.65619	1.26233	-2.7731	5e-05	0.000268034	6.71326	5.52511	5.79812	5.07488	0.258139	0.957156	0.500372	0.602112	-2.02268	3.42849e-16	1.89262e-14	4.07094	3.35832	3.43755	3.19716	0.143843	0.553289	0.267879	0.325229	-2.67176	9.6833e-27	1.73028e-24	GO:0000139,GO:0005794,GO:0006486,GO:0008378,GO:0016020,GO:0016021,GO:0016740,GO:0016757	beta 13 n galactosyltransferase;Smp_042720	Beta-1,3-n-acetylglucosaminyltransferase,putati ve [Source:UniProtKB/TrEMBL;Acc:G4VQL1]	gi|14042986|ref|NP_114436.1|	UDP-GlcNAc:betaGal beta-1,3-N-acetylglucosaminyltransferase 5 [Homo sapiens]
SmVG_029173	93.7896	64.6798	68.0287	80.0226	7.25575	13.591	11.1114	13.1292	-2.76519	5e-05	0.000268034	135.344	168.518	125.709	126.44	1.74232	11.6557	8.74592	21.5549	-2.71228	3.69448e-09	5.83489e-08	123.074	159.385	112.071	126.614	1.797	9.2265	6.84841	14.2823	-3.00224	1.06589e-16	4.86283e-15
Smp_155570	172.664	160.586	143.287	121.999	15.7508	21.7231	17.7414	33.852	-2.74847	5e-05	0.000268034	371.066	400.565	328.28	308.185	10.6024	22.8126	32.8814	44.0976	-2.45847	2.5899e-22	2.80645e-20	256.762	275.106	221.762	219.861	7.15773	15.7986	20.5628	27.1626	-2.98497	3.57515e-22	3.56558e-20	GO:0003824,GO:0004553,GO:0005975,GO:0008152,GO:0016787,GO:0016798	endoglycoceramidase;Smp_155570	Putative uncharacterized protein [Source:UniProtKB/TrEMBL;Acc:G4LZM9]	_	_
SmVG_016200	5.14638	4.43854	4.29366	3.42942	0.233959	0.949567	0.299337	1.1035	-2.74244	5e-05	0.000268034	3.06062	3.44626	2.93093	2.57432	0.0729558	0.16975	0.376833	0.478872	-2.43722	3.12189e-10	6.24537e-09	1.85716	2.11959	1.75082	1.62197	0.0402213	0.0994978	0.216816	0.257196	-2.81703	1.71722e-15	6.54605e-14
Smp_160300	4.67487	3.59591	3.24054	3.51007	0.0828999	0.804659	0.463878	1.0559	-2.64151	5e-05	0.000268034	6.26537	7.21342	6.98037	7.12404	0.228086	0.626223	0.844665	1.21653	-2.15693	1.50943e-13	5.52027e-12	4.16823	4.88908	4.59189	4.72719	0.157145	0.440231	0.523417	0.7108	-2.55023	1.59492e-19	1.12128e-17	GO:0016020,GO:0016021	hypothetical protein;Smp_160300	Putative uncharacterized protein [Source:UniProtKB/TrEMBL;Acc:G4VTH5]	_	_
Smp_156960	14.8188	32.19	26.0685	17.2621	2.91643	3.01469	2.5575	6.08972	-2.63153	5e-05	0.000268034	44.7521	18.6442	33.6747	25.4625	1.3225	2.6624	2.06295	4.96444	-2.30916	2.10174e-19	1.61821e-17	27.3729	11.6308	20.2931	16.2684	0.821451	1.62248	1.1375	2.77328	-2.77461	2.7649e-16	1.20379e-14	GO:0003824,GO:0008152,GO:0046872	nardilysin (M16 family);Smp_156960.2	Nardilysin (M16 family) [Source:UniProtKB/TrEMBL;Acc:G4VKA9]	_	_
Smp_187140	1336.76	1204.19	1235.65	1061.55	67.1262	264.599	124.078	354.054	-2.57872	5e-05	0.000268034	948.009	1021.62	954.124	916.174	24.6807	70.3075	131.379	161.51	-2.3122	8.0714e-09	1.19873e-07	563.21	613.142	557.85	563.534	13.526	41.2176	69.5282	86.1994	-2.64929	1.31464e-10	1.95081e-09	GO:0004197,GO:0005615,GO:0005764,GO:0006508,GO:0008234,GO:0051603	cathepsin L proteinase;Smp_187140	Subfamily C1A non-peptidase homologue (C01 family) [Source:UniProtKB/TrEMBL;Acc:G4LUV4]	gi|22202619|ref|NP_666023.1|	cathepsin L1 preproprotein [Homo sapiens]
Smp_000190	74.2069	69.2834	74.3976	66.1352	7.91728	14.1204	9.61452	16.6672	-2.55533	5e-05	0.000268034	71.3403	73.4135	73.4337	72.3112	3.58148	7.39767	8.47447	9.96551	-2.04611	1.36506e-34	4.31765e-32	39.3577	40.7604	39.6258	41.2513	1.80805	3.97952	4.09849	4.88637	-2.6388	4.42555e-36	2.10877e-33	GO:0000166,GO:0008152,GO:0016491,GO:0055114	short chain dehydrogenase:reductase family 16C;Smp_000190	Oxidoreductase, short chain dehydrogenase/reductase family, putative [Source:UniProtKB/TrEMBL;Acc:G4LVT4]	_	_
Smp_056460	10.3691	8.03603	7.31857	7.08053	1.23365	1.41854	0.560109	2.40341	-2.54634	5e-05	0.000268034	38.0343	47.1402	31.3695	31.6196	3.92288	4.63641	8.26548	6.24693	-1.50759	1.28697e-09	2.26146e-08	23.4084	29.4789	19.0565	20.1309	2.2799	2.84696	4.4888	3.54715	-2.00625	1.48351e-15	5.73156e-14		hypothetical protein;Smp_056460.6	Putative uncharacterized protein [Source:UniProtKB/TrEMBL;Acc:G4LYE9]	_	_
Smp_126120	149.793	128.66	148.981	135.939	10.3116	39.0059	15.0022	33.0905	-2.53195	5e-05	0.000268034	244.999	267.531	278.615	269.899	11.1784	20.5768	46.622	39.2426	-2.04222	1.57864e-08	2.17607e-07	134.939	148.718	150.279	154.125	5.48483	10.94	22.2466	18.9603	-2.52463	1.66351e-13	4.51517e-12		LAMA protein 2;Smp_126120	Putative uncharacterized protein [Source:UniProtKB/TrEMBL;Acc:G4VB02]	gi|229093316|ref|NP_775813.2|	putative phospholipase B-like 2 isoform 1 precursor [Homo sapiens]
Smp_139160	4559.39	3516.24	3764.18	3497.35	179.475	930.191	332.872	1212.96	-2.52998	5e-05	0.000268034	4708.3	5485.23	4640.55	4635.64	131.221	315.745	804.068	924.237	-2.26632	7.2678e-07	6.90382e-06	2857.42	3341.45	2761.84	2902.93	75.2721	190.395	436.655	510.984	-2.47864	6.1981e-08	5.15627e-07	GO:0004197,GO:0005615,GO:0005764,GO:0006508,GO:0008233,GO:0008234,GO:0016787,GO:0051603	SmCL2 peptidase (C01 family);Smp_139160	SmCL2-like peptidase (C01 family) [Source:UniProtKB/TrEMBL;Acc:G4LUV1]	gi|22202619|ref|NP_666023.1|	cathepsin L1 preproprotein [Homo sapiens]
Smp_026810	2.7349	2.8218	3.04641	2.46987	0.202378	0.767004	0.427448	0.532343	-2.52099	5e-05	0.000268034	3.57134	3.15738	3.5607	3.2263	0.146412	0.402537	0.636465	0.47353	-1.88213	2.99105e-08	3.94192e-07	2.44048	2.02381	2.28905	2.11732	0.177305	0.374168	0.390213	0.437216	-1.88855	7.05105e-20	5.12516e-18	GO:0007155,GO:0016020,GO:0016021	lysosome membrane protein 2;Smp_026810	Scavenger receptor class B type-2 (Sr-B2),putative [Source:UniProtKB/TrEMBL;Acc:G4LUS7]	_	_
Smp_136730	3202.65	2835.59	2960.67	2875.7	180.952	648.717	281.059	967.164	-2.51469	5e-05	0.000268034	2528.64	2863.54	2621.45	2795.06	116.246	212.366	466.795	564.791	-2.01487	7.52409e-09	1.12602e-07	1472.28	1688.77	1502.07	1682.7	65.6762	123.986	244.766	292.436	-2.28021	1.40164e-09	1.71497e-08	GO:0004190,GO:0005615,GO:0005764,GO:0006508,GO:0008233,GO:0016787,GO:0030163	cathepsin d (lysosomal aspartyl protease);Smp_136730	Subfamily A1A unassigned peptidase (A01 family) [Source:UniProtKB/TrEMBL;Acc:G4VFY7]	gi|4503143|ref|NP_001900.1|	cathepsin D preproprotein [Homo sapiens]
Smp_147070	22.3145	27.8805	23.2975	17.7596	3.37474	4.94191	3.48003	4.35001	-2.49862	5e-05	0.000268034	23.3121	17.2387	18.8144	15.9098	1.17276	1.99111	2.46792	2.23914	-1.95268	1.79085e-33	5.23959e-31	13.8554	10.2697	10.9094	9.66052	0.647924	1.13003	1.2777	1.15744	-2.61193	6.72818e-42	5.77076e-39	GO:0003333,GO:0005783,GO:0015171,GO:0016020,GO:0016021	sodium coupled neutral amino acid;Smp_147070	Putative amino acid transporter [Source:UniProtKB/TrEMBL;Acc:G4VKU1]	gi|222418629|ref|NP_775785.2|	putative sodium-coupled neutral amino acid transporter 9 [Homo sapiens]
Smp_001100	7.9409	11.5592	11.483	8.49855	2.12597	1.19113	1.14936	2.60903	-2.48028	5e-05	0.000268034	14.4232	9.46082	14.5534	12.1292	1.34596	1.09265	1.14224	2.16699	-1.91613	1.00674e-15	5.21323e-14	8.32994	5.50574	8.21246	7.21192	0.720685	0.648205	0.568828	1.13873	-2.40816	1.01471e-21	9.67022e-20	GO:0005201,GO:0005509,GO:0005515,GO:0005578,GO:0009986,GO:0016020	fibrillin 2;Smp_001100	Putative uncharacterized protein [Source:UniProtKB/TrEMBL;Acc:G4V5Q9]	gi|281485550|ref|NP_000129.3|	fibrillin-1 precursor [Homo sapiens]
Smp_169260	39.9858	62.0083	54.1876	39.1774	8.87124	4.93634	7.10355	14.3669	-2.46929	5e-05	0.000268034	54.4906	32.4209	45.7611	35.9678	3.52769	4.30021	2.58742	7.20225	-2.10864	4.69843e-21	4.36395e-19	31.2639	18.787	25.8351	21.3987	1.85974	2.42483	1.32121	3.74297	-2.58904	2.12549e-19	1.44822e-17	GO:0003676,GO:0005622,GO:0008270,GO:0046872	zinc finger protein 362;Smp_169260	Putative zinc finger protein [Source:UniProtKB/TrEMBL;Acc:G4VGX5]	_	_
Smp_085010	851.564	729.267	737.981	721.656	52.2985	182.384	99.121	227.343	-2.43784	5e-05	0.000268034	686.562	753.837	662.584	713.577	20.7058	60.8622	101.788	119.043	-2.16741	9.31261e-09	1.36573e-07	422.936	467.306	404.05	454.142	12.2485	37.594	58.3369	68.3899	-2.55344	1.0607e-11	2.00389e-10	GO:0004197,GO:0005615,GO:0005764,GO:0006508,GO:0008234,GO:0016787,GO:0051603	cathepsin B peptidase (C01 family);Smp_085010	Cathepsin B-like peptidase (C01 family) [Source:UniProtKB/TrEMBL;Acc:G4V5D3]	gi|224586907|ref|NP_055279.3|	tubulointerstitial nephritis antigen [Homo sapiens]
SmVG_030160:Smp_166530	154.806	127.416	128.393	113.063	9.00755	37.4358	16.5177	34.8067	-2.42125	5e-05	0.000268034	134.21	148.357	130.858	125.339	4.07688	11.6185	22.3983	20.7575	-2.16275	1.60316e-07	1.75672e-06	76.7691	85.7971	73.455	74.2991	2.12556	6.47467	11.2397	10.4639	-2.5638	1.30364e-11	2.43072e-10		phospholipase A;Smp_166530	Phosphatidylcholine-sterol acyltransferase (Lecithin-cholesterol acyltransferase)/ Phospholipase A [Source:UniProtKB/TrEMBL;Acc:C4QJA6]	gi|4557892|ref|NP_000220.1|	phosphatidylcholine-sterol acyltransferase precursor [Homo sapiens]
SmVG_030160:Smp_166530.2	154.806	127.416	128.393	113.063	9.00755	37.4358	16.5177	34.8067	-2.42125	5e-05	0.000268034	134.21	148.357	130.858	125.339	4.07688	11.6185	22.3983	20.7575	-2.16275	1.60316e-07	1.75672e-06	76.7691	85.7971	73.455	74.2991	2.12556	6.47467	11.2397	10.4639	-2.5638	1.30364e-11	2.43072e-10		phospholipase A;Smp_166530.2
SmVG_030160:Smp_166540	154.806	127.416	128.393	113.063	9.00755	37.4358	16.5177	34.8067	-2.42125	5e-05	0.000268034	134.21	148.357	130.858	125.339	4.07688	11.6185	22.3983	20.7575	-2.16275	1.60316e-07	1.75672e-06	76.7691	85.7971	73.455	74.2991	2.12556	6.47467	11.2397	10.4639	-2.5638	1.30364e-11	2.43072e-10		serine:threonine protein kinase Nek11;note=pfam_scan%3BPfam:PF00069.20%3B%3BE()%3D2.0E-45%3Bscore%3D154.8%3Bq uery 33-207%3Bdescription%3DPkinase;Smp_166540	Kinase [Source:UniProtKB/TrEMBL;Acc:C4QJA8]	gi|225637560|ref|NP_079076.3|	serine/threonine-protein kinase Nek11 isoform 1 [Homo sapiens]
Smp_016490	2727.94	2213.73	2048.52	2087.38	194.198	422.938	301.445	780.157	-2.41784	5e-05	0.000268034	2239.46	2653.59	1988.21	2246.48	87.8653	226.615	275.736	474.535	-2.08827	1.28127e-15	6.46326e-14	1343.17	1609.99	1184.55	1403.87	49.9322	136.04	150.475	259.605	-2.42206	1.3599e-11	2.50836e-10		Saposin B domain containing protein;Smp_016490	Putative uncharacterized protein [Source:UniProtKB/TrEMBL;Acc:G4VHH3]	_	_
Smp_202610	1402.23	1213.89	1241.01	1166.45	90.9161	260.356	185.776	405.05	-2.41477	5e-05	0.000268034	921.448	1019.66	931.448	950.852	31.9265	99.4448	120.757	180.241	-2.09353	7.07974e-12	1.90033e-10	569.732	640.386	574.624	612.864	19.1372	62.5246	69.9671	104.739	-2.44342	8.81463e-13	2.11182e-11	GO:0001664,GO:0005737,GO:0008047,GO:0043085	hypothetical protein;note=iprscan%3BInterPro:IPR011001 : Saposin-like%3BSuperfamily:SSF47862%3B%3Bscore%3D1.5E-14%3Bquery 39-118%3Bdescription%3DSaposin-like;note=iprscan%3BPANTHER:PTHR11480%3B%3Bscore%3D7.8E-6%3Bquery 42-121%3Bdescription%3Dnull;Smp_202610	Putative uncharacterized protein Smp_202610 [Source:UniProtKB/TrEMBL;Acc:G4VHH2]	_	_
SmVG_001558	6.31413	5.55014	6.01771	5.42534	0.900382	1.18385	0.445321	1.91137	-2.39185	5e-05	0.000268034	23.5539	23.7632	22.8086	21.5168	0.73885	2.47985	4.18754	5.23841	-2.02458	1.05666e-06	9.72181e-06	13.8656	14.2485	13.2639	13.2454	0.405662	1.3975	2.29517	2.8305	-2.2213	7.8542e-09	8.2153e-08
SmVG_025381:Smp_104270	512.774	478.522	451.773	394.925	46.3576	104.255	62.5859	137.326	-2.39054	5e-05	0.000268034	399.706	406.37	366.358	353.075	18.7026	39.5688	53.593	68.9098	-2.00177	6.79613e-19	4.94007e-17	230.032	235.024	206.803	209.554	9.68424	22.0535	26.8281	35.0945	-2.43893	3.71615e-17	1.84239e-15		ectonucleotide pyrophosphatase:phosphodiesterase;Smp_104270	Putative ectonucleotide pyrophosphatase/phosphodiesterase [Source:UniProtKB/TrEMBL;Acc:G4VRB5]	gi|91823274|ref|NP_006200.3|	ectonucleotide pyrophosphatase/phosphodiesterase family member 2 isoform 1 preproprotein [Homo sapiens]
SmVG_025381:Smp_180390	512.774	478.522	451.773	394.925	46.3576	104.255	62.5859	137.326	-2.39054	5e-05	0.000268034	399.706	406.37	366.358	353.075	18.7026	39.5688	53.593	68.9098	-2.00177	6.79613e-19	4.94007e-17	230.032	235.024	206.803	209.554	9.68424	22.0535	26.8281	35.0945	-2.43893	3.71615e-17	1.84239e-15		mitochondrial carrier 2;Smp_180390	Putative mitochondrial carrier [Source:UniProtKB/TrEMBL;Acc:G4VRB6]	gi|7657347|ref|NP_055157.1|	mitochondrial carrier homolog 2 [Homo sapiens]
SmVG_019718	2.28826	2.02125	1.83807	2.12555	0	0.620373	0.185224	0.785337	-2.37856	5e-05	0.000268034	2.55246	2.40991	2.24828	2.5808	0.0695726	0.333832	0.648452	0.541071	-1.77134	0.000812967	0.00345786	1.50469	1.4443	1.29445	1.5641	0.0383138	0.190758	0.321115	0.28119	-2.01347	4.58827e-10	6.17795e-09
Smp_146180	20.6567	18.9208	21.5122	20.4076	1.46557	5.35296	2.34161	6.58994	-2.37139	5e-05	0.000268034	25.1191	26.4586	28.4501	30.0974	1.00916	1.98872	4.35324	4.99114	-2.12269	4.99476e-09	7.72175e-08	14.5431	15.5367	16.1511	18.1476	0.598294	1.21009	2.26473	2.60894	-2.46303	9.64508e-13	2.28525e-11		lipase 1;sterol esterase 1;sterol esterase 2;lysosomal acid lipase-related;Smp_146180	Sterol esterase [Source:UniProtKB/TrEMBL;Acc:G4VQT1]	gi|156447044|ref|NP_001095939.1|	lipase member N precursor [Homo sapiens]
Smp_170280	3.86435	5.53853	5.05867	3.6902	0.706631	0.977337	0.54795	1.28645	-2.36713	5e-05	0.000268034	4.94756	3.50102	4.5427	3.65754	0.419949	0.444205	0.574535	0.685565	-1.75601	1.48516e-23	2.02103e-21	2.89834	2.05719	2.59843	2.20137	0.223435	0.267048	0.31206	0.356179	-2.27163	2.96846e-24	4.24341e-22	GO:0007155,GO:0007229,GO:0008305,GO:0016020,GO:0016021	integrin alpha ps;Smp_170280	Putative integrin alpha-ps [Source:UniProtKB/TrEMBL;Acc:G4V8A1]	_	_
Smp_008610	447.581	383.555	459.355	404.244	36.1059	103.963	52.1652	139.938	-2.35106	5e-05	0.000268034	367.835	400.113	416.853	401.458	15.3177	35.3954	58.7699	78.5448	-2.06406	3.38597e-11	8.02145e-10	196.72	217.196	218.809	223.911	7.32384	18.51	27.416	36.1135	-2.40849	6.07882e-12	1.24138e-10	GO:0004531,GO:0005622,GO:0006259,GO:0006309	deoxyribonuclease ii;Smp_008610	Deoxyribonuclease II-related [Source:UniProtKB/TrEMBL;Acc:G4LWH7]	gi|194473657|ref|NP_067056.2|	deoxyribonuclease-2-beta isoform 1 precursor [Homo sapiens]
Smp_142490	109.085	109.686	89.0606	89.043	7.61637	19.2117	17.7652	33.4297	-2.34671	5e-05	0.000268034	119.278	119.244	94.7385	105.155	3.9753	13.8641	15.4886	20.7319	-1.98947	1.01576e-09	1.81765e-08	66.4026	65.9981	51.357	59.5012	1.84913	7.29905	7.04982	9.9851	-2.3568	6.11071e-14	1.77666e-12	GO:0016020,GO:0016021	Transmembrane protein 45B;Smp_142490	Epididymal membrane protein E9-related [Source:UniProtKB/TrEMBL;Acc:G4VE75]	gi|20270331|ref|NP_620143.1|	transmembrane protein 45B [Homo sapiens]
Smp_199310	15.718	25.9526	17.4624	18.0327	1.35055	4.02108	2.31423	7.4946	-2.34575	0.0002	0.000928806	17.4375	11.4007	12.4613	14.546	0.462998	1.19096	1.18543	3.29319	-2.08469	0.000365668	0.00173466	17.3806	14.5942	12.6618	15.0863	0.495463	1.32546	1.87644	2.91749	-2.27632	2.2209e-11	3.88993e-10		RWD domain containing protein;note=predicted by EVM2;Smp_199310
Smp_036010	46.045	47.5033	45.6916	33.9021	6.36907	7.47255	7.75313	12.9482	-2.32549	5e-05	0.000268034	53.6283	49.7511	50.5357	40.6433	2.62123	5.62154	6.0033	7.71296	-1.99814	9.85575e-38	4.27192e-35	31.646	29.6211	29.38	24.8775	1.44394	3.26063	3.20705	4.15483	-2.49001	1.06065e-28	2.39026e-26	GO:0015095,GO:0015693,GO:0016020,GO:0016021,GO:1903830	magnesium transporter nipa2;Smp_036010	Putative uncharacterized protein [Source:UniProtKB/TrEMBL;Acc:G4VHT3]	gi|46409302|ref|NP_997213.1|	magnesium transporter NIPA3 [Homo sapiens]
Smp_006760	20.57	19.9937	20.466	17.048	2.00087	4.84634	3.36656	5.39412	-2.32263	5e-05	0.000268034	18.3544	18.7633	19.1653	17.2987	0.828571	2.63418	3.18017	3.37233	-1.84213	2.40082e-09	3.96848e-08	10.4731	10.8795	10.7528	10.3973	0.463761	1.51174	1.61393	1.7475	-2.22685	8.74396e-18	4.71679e-16	GO:0005764,GO:0016020,GO:0016021	fasting inducible integral membrane protein;Smp_006760	Fasting-inducible integral membrane protein tm6p1-related [Source:UniProtKB/TrEMBL;Acc:C4PYV9]	gi|110825978|ref|NP_060840.2|	DNA damage-regulated autophagy modulator protein 1 [Homo sapiens]
Smp_172590	1000.54	845.828	897.024	797.613	77.2775	215.628	118.55	297.096	-2.32121	5e-05	0.000268034	852.04	926.509	854.027	833.02	34.3815	79.5267	131.199	170.231	-2.06617	2.273e-11	5.62387e-10	485.083	531.809	475.904	489.095	17.8104	44.2522	64.9678	85.2843	-2.41194	9.52309e-12	1.83434e-10	GO:0004180,GO:0004185,GO:0006508,GO:0008233,GO:0016787,GO:0051603	family S10 unassigned peptidase (S10 family);Smp_172590	Family S10 unassigned peptidase (S10 family) [Source:UniProtKB/TrEMBL;Acc:G4VHZ1]	gi|119395729|ref|NP_000299.2|	lysosomal protective protein isoform a precursor [Homo sapiens]
SmVG_014953:Smp_075800	4344.59	3678.36	3959.75	3543.6	387.647	1114.35	417.868	1206.56	-2.31213	5e-05	0.000268034	7029.09	7969.7	7523.55	7652.54	244.121	580.774	1187.08	1338.44	-2.16863	1.75236e-08	2.3791e-07	4120.34	4680.61	4327.37	4598.71	127.733	328.48	603.268	697.593	-2.5303	2.71791e-10	3.79049e-09		hemoglobinase (C13 family);Smp_075800	Hemoglobinase [Source:UniProtKB/Swiss-Prot;Acc:P09841]	gi|56682964|ref|NP_001008530.1|	legumain preproprotein [Homo sapiens]
SmVG_014953:Smp_179170	4344.59	3678.36	3959.75	3543.6	387.647	1114.35	417.868	1206.56	-2.31213	5e-05	0.000268034	7029.09	7969.7	7523.55	7652.54	244.121	580.774	1187.08	1338.44	-2.16863	1.75236e-08	2.3791e-07	4120.34	4680.61	4327.37	4598.71	127.733	328.48	603.268	697.593	-2.5303	2.71791e-10	3.79049e-09		hemoglobinase (C13 family);Smp_179170
SmVG_031722:Smp_102780	9.76284	8.01991	10.4606	8.57421	0.480304	3.17035	1.54484	2.3242	-2.29165	5e-05	0.000268034	12.0858	14.6763	13.0136	13.7937	0.330298	1.60191	2.62283	2.14329	-2.03561	9.86562e-05	0.000557227	8.25468	9.79418	8.71313	9.4452	0.230559	1.09995	1.68692	1.31511	-2.29284	4.13214e-09	4.50591e-08		N methyl D aspartate receptor associated;Smp_102780	N-methyl-D-aspartate receptor-associated protein, putative [Source:UniProtKB/TrEMBL;Acc:G4LZR6]	_	_
SmVG_031722:Smp_204810	9.76284	8.01991	10.4606	8.57421	0.480304	3.17035	1.54484	2.3242	-2.29165	5e-05	0.000268034	12.0858	14.6763	13.0136	13.7937	0.330298	1.60191	2.62283	2.14329	-2.03561	9.86562e-05	0.000557227	8.25468	9.79418	8.71313	9.4452	0.230559	1.09995	1.68692	1.31511	-2.29284	4.13214e-09	4.50591e-08		hypothetical protein;note=tmhmm%3B%3Bquery 1-168%3B;Smp_204810	Putative uncharacterized protein Smp_204810 [Source:UniProtKB/TrEMBL;Acc:G4LZR7]	_	_
Smp_212430	9.1127	11.3234	14.8958	20.4372	2.07142	2.64601	3.51794	3.17337	-2.28933	5e-05	0.000268034	7.55026	5.09918	8.74165	12.2047	0.353627	0.964495	0.569524	0.961291	-2.04173	1.67845e-20	1.46589e-18	5.09897	3.90704	6.56397	10.3973	0.425086	1.08913	0.629717	0.733509	-2.40574	1.83218e-19	1.27761e-17		nuclear hormone receptor;Smp_212430	Putative nuclear hormone receptor [Source:UniProtKB/TrEMBL;Acc:G4VD33]	_	_
Smp_160830	223.144	195.014	152.579	148.853	21.3002	41.2038	32.6386	53.394	-2.27636	0.0001	0.000501375	245.958	265.66	184.752	201.764	10.3848	27.3908	29.8904	36.6237	-1.97025	3.29546e-15	1.56775e-13	142.47	155.03	104.914	120.146	5.34611	15.3408	14.8731	18.7695	-2.45989	9.39234e-20	6.76959e-18	GO:0003824,GO:0008152	phospholipase d3;Smp_160830	Phospholipase d-related [Source:UniProtKB/TrEMBL;Acc:G4VFV5]	gi|307775443|ref|NP_689879.2|	inactive phospholipase D5 isoform 1 [Homo sapiens]
SmVG_024781:Smp_043390	32.3937	27.2492	29.6575	25.4715	3.02627	8.32368	4.20072	8.34762	-2.26379	5e-05	0.000268034	27.0634	29.7318	28.3627	26.8297	1.27977	2.76448	4.9761	4.75664	-1.95646	1.0386e-09	1.85286e-08	15.5659	17.2226	16.0033	15.9722	0.665192	1.54661	2.51177	2.42989	-2.38286	2.93733e-14	8.93384e-13		beta D xylosidase 2;Smp_043390	Putative uncharacterized protein [Source:UniProtKB/TrEMBL;Acc:G4VRX3]	_	_
SmVG_024781:Smp_145550	32.3937	27.2492	29.6575	25.4715	3.02627	8.32368	4.20072	8.34762	-2.26379	5e-05	0.000268034	27.0634	29.7318	28.3627	26.8297	1.27977	2.76448	4.9761	4.75664	-1.95646	1.0386e-09	1.85286e-08	15.5659	17.2226	16.0033	15.9722	0.665192	1.54661	2.51177	2.42989	-2.38286	2.93733e-14	8.93384e-13		sister chromatid cohesion protein dcc1;Smp_145550	Dcc1-related [Source:UniProtKB/TrEMBL;Acc:G4VRX4]	_	_
SmVG_024781:Smp_145560	32.3937	27.2492	29.6575	25.4715	3.02627	8.32368	4.20072	8.34762	-2.26379	5e-05	0.000268034	27.0634	29.7318	28.3627	26.8297	1.27977	2.76448	4.9761	4.75664	-1.95646	1.0386e-09	1.85286e-08	15.5659	17.2226	16.0033	15.9722	0.665192	1.54661	2.51177	2.42989	-2.38286	2.93733e-14	8.93384e-13		oxalate:formate antiporter;Smp_145560	Putative oxalate:formate antiporter [Source:UniProtKB/TrEMBL;Acc:G4VRX1]	_	_
SmVG_018887	76.2674	79.0751	97.3776	81.1535	18.2607	10.5645	14.3812	26.7534	-2.2547	5e-05	0.000268034	35.3045	33.4953	44.666	37.2154	3.13147	3.52898	2.20196	8.83724	-2.02689	6.06811e-10	1.14172e-08	35.1267	35.4765	48.0146	44.6221	2.62545	3.5566	3.85629	9.89764	-2.24729	5.87558e-12	1.20274e-10
Smp_141030	4.9649	10.277	4.60806	5.19926	0.732776	1.72333	0.201023	2.61739	-2.24765	5e-05	0.000268034	17.5716	11.3106	9.49878	8.08981	0.71106	0.413011	1.38934	2.2152	-2.27853	5.30479e-08	6.61855e-07	11.836	8.32213	6.05239	6.03733	0.467822	0.408796	0.760473	1.49826	-2.46364	1.70391e-09	2.04112e-08		epidermal growth factor receptor pathway%3B epidermal growth factor receptor kinase;Smp_141030	Putative uncharacterized protein [Source:UniProtKB/TrEMBL;Acc:G4M1Z2]	gi|21264616|ref|NP_073609.2|	epidermal growth factor receptor kinase substrate 8-like protein 2 [Homo sapiens]
SmVG_025512	3.98551	4.5725	5.71944	8.25027	1.47149	0.971704	1.13857	1.17907	-2.24241	0.0074	0.0206173	3.03605	2.39831	3.7185	5.57403	0.498659	1.0611	0.784512	0.741345	-0.936531	0.000129297	0.000703799	2.0444	1.72888	2.3167	4.12239	0.277988	0.476444	0.337777	0.346244	-1.97517	4.06852e-11	6.8289e-10	GO:0015631,GO:0030992,GO:0042073,GO:0042384
SmVG_011949:Smp_030050	5.14941	5.82511	5.98124	4.69816	0.58266	1.46678	1.06149	1.47503	-2.23933	5e-05	0.000268034	4.75713	3.96857	4.56362	4.04217	0.228018	0.560709	0.695723	0.794795	-1.83843	1.3558e-14	5.94269e-13	2.84244	2.39644	2.68603	2.49479	0.123751	0.326583	0.378873	0.423711	-2.27574	2.54163e-19	1.7165e-17		NK 2 class homeodomain protein Nkx2 5;Smp_030050	Putative nk-2 homeobox protein [Source:UniProtKB/TrEMBL;Acc:G4VFL0]	gi|4758090|ref|NP_004378.1|	homeobox protein Nkx-2.5 isoform 1 [Homo sapiens]
SmVG_011949:Smp_138390	5.14941	5.82511	5.98124	4.69816	0.58266	1.46678	1.06149	1.47503	-2.23933	5e-05	0.000268034	4.75713	3.96857	4.56362	4.04217	0.228018	0.560709	0.695723	0.794795	-1.83843	1.3558e-14	5.94269e-13	2.84244	2.39644	2.68603	2.49479	0.123751	0.326583	0.378873	0.423711	-2.27574	2.54163e-19	1.7165e-17		transcription factor related 3 K09343 homeobox;Smp_138390	Putative nk-2 homeobox protein [Source:UniProtKB/TrEMBL;Acc:G4VFL1]	_	_
SmVG_028633	1.73351	4.13997	4.11716	3.24669	0.301771	0	1.11553	1.39014	-2.23729	0.0007	0.00277151	3.95707	2.07753	3.55814	3.40171	0	0.780518	0	0.650867	-3.07489	0.00234228	0.00850765	2.54138	1.34567	2.1419	2.48753	0.0990735	0.46308	0	0.353628	-2.3128	1.11977e-08	1.12462e-07
Smp_127370	25.5867	26.1707	25.6054	21.4291	1.0231	8.119	2.96811	8.85819	-2.23618	5e-05	0.000268034	18.0558	17.4013	17.5462	16.6592	0.341188	1.55228	3.55612	3.66237	-2.21192	0.000168458	0.000886449	10.7565	10.2932	10.2226	10.1322	0.191877	0.942131	1.79875	1.9652	-2.27417	3.93448e-07	2.71489e-06	GO:0003829,GO:0008109,GO:0008375,GO:0016020,GO:0016021,GO:0016740,GO:0016757	glycosyltransferase 14 family member;Smp_127370	Glycosyltransferase 14 family member, putative [Source:UniProtKB/TrEMBL;Acc:G4LUI0]	gi|4503963|ref|NP_001482.1|	N-acetyllactosaminide beta-1,6-N-acetylglucosaminyl-transferase isoform B [Homo sapiens]
SmVG_025646	16.0126	12.2597	12.6965	11.9428	0.587336	3.71073	1.6265	5.39351	-2.22495	5e-05	0.000268034	21.8511	21.0683	20.1073	20.4438	0.360264	2.04436	2.66331	4.9088	-2.33978	2.68647e-06	2.26675e-05	14.0294	14.0928	12.7391	14.3248	0.255755	0.878946	1.25054	2.45473	-2.72123	3.27136e-11	5.57822e-10
SmVG_025638:Smp_102210	39.0405	46.1932	38.0991	29.9676	5.12041	9.22177	6.28939	12.183	-2.22395	5e-05	0.000268034	39.8317	31.2036	31.5645	27.7157	2.29771	3.25931	4.38175	6.08937	-1.92522	3.73821e-34	1.15127e-31	25.8572	21.3162	20.5047	19.1208	1.41303	2.55884	2.74757	3.85809	-2.23237	2.88182e-22	2.90793e-20		lysosomal alpha mannosidase;Smp_102210	Putative uncharacterized protein [Source:UniProtKB/TrEMBL;Acc:G4VTI0]	_	_
SmVG_025638:Smp_131580	39.0405	46.1932	38.0991	29.9676	5.12041	9.22177	6.28939	12.183	-2.22395	5e-05	0.000268034	39.8317	31.2036	31.5645	27.7157	2.29771	3.25931	4.38175	6.08937	-1.92522	3.73821e-34	1.15127e-31	25.8572	21.3162	20.5047	19.1208	1.41303	2.55884	2.74757	3.85809	-2.23237	2.88182e-22	2.90793e-20		lysosomal alpha mannosidase;Smp_131580	Putative lysosomal alpha-mannosidase (Mannosidase alpha class 2b member 1) [Source:UniProtKB/TrEMBL;Acc:G4VTI2]	gi|51477714|ref|NP_002363.2|	alpha-mannosidase 2 [Homo sapiens]
Smp_179570	2.92648	4.35977	2.89716	2.34077	0.451567	0.48579	0.742537	1.01172	-2.21817	5e-05	0.000268034	3.89774	2.59779	2.63939	2.56614	0.201201	0.526674	0.375216	0.602366	-1.71117	9.44603e-12	2.50673e-10	2.33732	1.54289	1.60371	1.57545	0.112997	0.350821	0.205131	0.318446	-2.06608	2.62526e-14	8.07057e-13	GO:0016020,GO:0016021	otopetrin;Smp_179570	Otopetrin, putative [Source:UniProtKB/TrEMBL;Acc:G4M1S8]	_	_
Smp_128940	30.057	30.7618	26.2542	21.4773	1.41958	8.26873	3.78637	9.91874	-2.21419	0.00025	0.00113276	26.2396	24.8129	22.3123	20.2555	0.578426	2.32173	4.2555	4.81503	-2.17148	1.04774e-05	7.64442e-05	15.1263	14.5103	12.6854	12.1331	0.303205	1.30767	2.17085	2.47629	-2.34217	3.24472e-08	2.88992e-07	GO:0004871,GO:0004930,GO:0005886,GO:0005887,GO:0007165,GO:0007186,GO:0007196,GO:0008066,GO:0016020,GO:0016021,GO:0042734,GO:0051966	metabotropic glutamate receptor;Smp_128940	Putative metabotropic glutamate receptor [Source:UniProtKB/TrEMBL;Acc:G4V9E9]	gi|4504141|ref|NP_000832.1|	metabotropic glutamate receptor 4 precursor [Homo sapiens]
Smp_028870	530.563	437.55	461.621	460.414	38.2466	132.236	71.4187	169.801	-2.19882	5e-05	0.000268034	847.526	909.178	846.204	911.241	37.3165	91.7964	144.739	195.61	-1.94613	3.74486e-10	7.37814e-09	464.926	506.989	457.464	523.892	18.7766	49.8321	70.9567	94.856	-2.2426	2.39478e-10	3.36722e-09	GO:0001664,GO:0005737,GO:0008047,GO:0043085	Zinc finger%2C C2H2 type domain containing protein;Smp_028870	Putative uncharacterized protein [Source:UniProtKB/TrEMBL;Acc:G4VBD6]	_	_
Smp_154590	51.6961	41.9949	37.3968	29.2035	5.53057	11.4432	8.46407	9.61814	-2.19296	5e-05	0.000268034	48.6969	61.0459	39.5442	37.361	2.94216	6.55725	7.09117	7.26023	-1.79375	3.76728e-17	2.33272e-15	31.9969	40.8379	25.3496	26.5851	1.75459	4.42073	4.02111	4.39124	-2.29329	8.33018e-22	8.02786e-20		hypothetical protein;Smp_154590	Putative uncharacterized protein [Source:UniProtKB/TrEMBL;Acc:G4LV60]	_	_
Smp_105450	3401.84	2497.62	3066.51	2413.31	328.002	434.078	517.615	1232.7	-2.17927	5e-05	0.000268034	12863	14275.1	11720.6	11052	734.882	1758.33	1942.85	3562.69	-1.77086	7.3456e-18	4.96911e-16	7808.76	8806.69	7080.75	6956.04	424.225	1060.04	1059.59	1959.74	-1.94654	8.17576e-09	8.49981e-08	GO:0001664,GO:0005737,GO:0006629,GO:0008047,GO:0043085	saposin containing protein;Smp_105450.2	Saposin containing protein [Source:UniProtKB/TrEMBL;Acc:G4VC39]	_	_
SmVG_025265:Smp_024290	6.08524	8.09523	7.25169	4.89257	0.945322	1.42587	1.19309	2.30682	-2.16472	5e-05	0.000268034	6.21991	5.09044	5.8977	4.43472	0.325704	0.667902	0.777505	1.16427	-1.88956	1.36452e-22	1.55039e-20	3.69918	2.97805	3.41082	2.74829	0.184718	0.44508	0.458497	0.624215	-2.13837	7.1378e-16	2.97189e-14		map kinase kinase protein ddmek1;Smp_024290	Putative map kinase kinase protein DdMEK1 [Source:UniProtKB/TrEMBL;Acc:G4VQ82]	_	_
SmVG_025265:Smp_135340	6.08524	8.09523	7.25169	4.89257	0.945322	1.42587	1.19309	2.30682	-2.16472	5e-05	0.000268034	6.21991	5.09044	5.8977	4.43472	0.325704	0.667902	0.777505	1.16427	-1.88956	1.36452e-22	1.55039e-20	3.69918	2.97805	3.41082	2.74829	0.184718	0.44508	0.458497	0.624215	-2.13837	7.1378e-16	2.97189e-14		discoidin domain receptor;Smp_135340	Putative discoidin domain receptor [Source:UniProtKB/TrEMBL;Acc:G4VQ83]	gi|83977452|ref|NP_054700.2|	epithelial discoidin domain-containing receptor 1 isoform 3 precursor [Homo sapiens]
Smp_024180	78.8072	72.4312	67.7993	66.9129	14.4935	23.0613	9.82185	16.4748	-2.16298	5e-05	0.000268034	148.598	153.912	138.708	152.529	14.9782	16.9621	32.2049	22.805	-1.53713	1.18154e-10	2.57495e-09	88.1965	91.6589	80.519	93.0791	7.97541	9.77322	16.5683	11.9312	-2.08414	2.43032e-23	2.85546e-21	GO:0016020,GO:0016021	placenta specific gene 8 protein;Smp_024180	Putative placenta-specificprotein 8 protein (C15 protein) [Source:UniProtKB/TrEMBL;Acc:G4VQ68]	_	_
Smp_165210	10.4344	10.3654	11.3334	8.76268	1.4179	2.57116	2.0749	3.16612	-2.14754	5e-05	0.000268034	9.52038	9.11967	9.89262	8.88625	0.646219	1.45547	1.54872	1.86285	-1.69098	5.09526e-23	6.55273e-21	5.381	5.25449	5.51164	5.22814	0.317566	0.819162	0.777311	0.940349	-2.10795	1.91586e-23	2.41652e-21	GO:0004672,GO:0004674,GO:0005524,GO:0005634,GO:0006468,GO:0016301,GO:0016310,GO:0016772	serine:threonine protein kinase 17A;Smp_165210	Serine/threonine kinase [Source:UniProtKB/TrEMBL;Acc:G4M1I2]	gi|109255245|ref|NP_004751.2|	serine/threonine-protein kinase 17A [Homo sapiens]
Smp_197450	9.79915	14.4023	12.6302	7.79959	1.97982	2.42608	2.47538	3.21887	-2.14368	5e-05	0.000268034	14.3458	9.65688	12.7233	8.88768	0.922008	1.80521	1.4517	2.07416	-1.75365	2.4084e-32	6.87451e-30	8.65934	5.94516	7.59877	5.64015	0.508196	1.06372	0.826898	1.12279	-2.18313	5.68415e-23	6.33155e-21	GO:0005622,GO:0006810,GO:0046872	phosphatidylinositol transfer protein;Smp_197450
SmVG_023808:Smp_143080	3.50054	4.50012	4.31486	3.69352	1.1036	0.749387	0.485879	1.29263	-2.14025	5e-05	0.000268034	4.42219	3.60928	4.2673	3.6404	0.740852	0.682193	0.372615	0.597523	-1.49543	9.78515e-08	1.14401e-06	2.6917	2.33033	2.55278	2.29937	0.401812	0.397031	0.19227	0.360111	-2.02695	5.1315e-15	1.81871e-13		hypothetical protein;note=predicted by EVM2;Smp_143080	Putative uncharacterized protein [Source:UniProtKB/TrEMBL;Acc:G4VNK4]	_	_
SmVG_023808:Smp_182180	3.50054	4.50012	4.31486	3.69352	1.1036	0.749387	0.485879	1.29263	-2.14025	5e-05	0.000268034	4.42219	3.60928	4.2673	3.6404	0.740852	0.682193	0.372615	0.597523	-1.49543	9.78515e-08	1.14401e-06	2.6917	2.33033	2.55278	2.29937	0.401812	0.397031	0.19227	0.360111	-2.02695	5.1315e-15	1.81871e-13		hypothetical protein;note=pfam_scan%3BPfam:PF00595.19%3B%3BE()%3D5.7E-6%3Bscore%3D26.2%3Bque ry 2-48%3Bdescription%3DPDZ;Smp_182180	Putative uncharacterized protein [Source:UniProtKB/TrEMBL;Acc:G4VNK5]	_	_
Smp_151590	17.7793	17.9696	15.6671	14.7558	1.72002	5.42546	2.72996	5.14059	-2.13971	5e-05	0.000268034	22.1291	20.6571	19.4027	19.5738	1.04582	2.34	3.55199	3.53305	-1.87483	8.73055e-12	2.32742e-10	12.4908	11.7065	10.6968	11.4056	0.523092	1.28146	1.72427	1.73691	-2.32237	6.7474e-18	3.66281e-16		Centrosomal protein of 135 kDa (Cep135 protein);Smp_151590	Putative centrosomal protein of 135 kDa (Cep135 protein) (Centrosomal protein 4) [Source:UniProtKB/TrEMBL;Acc:G4V5N5]	_	_
SmVG_008357:Smp_021190	2.23207	3.05804	2.27783	2.47941	0.511467	0.703627	0.318082	0.769072	-2.1257	5e-05	0.000268034	2.83623	2.10265	2.15571	2.30528	0.222531	0.24251	0.391794	0.425897	-1.69097	2.47835e-16	1.3746e-14	1.6475	1.26257	1.20896	1.37464	0.121957	0.131661	0.220277	0.21488	-2.17708	1.30328e-18	7.76269e-17		histidine kinase;Smp_021190	Putative histidine kinase [Source:UniProtKB/TrEMBL;Acc:G4VDJ8]	_	_
SmVG_008357:Smp_133680	2.23207	3.05804	2.27783	2.47941	0.511467	0.703627	0.318082	0.769072	-2.1257	5e-05	0.000268034	2.83623	2.10265	2.15571	2.30528	0.222531	0.24251	0.391794	0.425897	-1.69097	2.47835e-16	1.3746e-14	1.6475	1.26257	1.20896	1.37464	0.121957	0.131661	0.220277	0.21488	-2.17708	1.30328e-18	7.76269e-17		hypothetical protein;note=predicted by EVM2;Smp_133680	Putative uncharacterized protein [Source:UniProtKB/TrEMBL;Acc:G4VDJ7]	gi|148235600|ref|NP_003778.2|	nucleolar protein 4 isoform 1 [Homo sapiens]
Smp_076320	13.7975	22.3397	23.5719	34.0772	5.19415	3.72151	5.51756	7.28074	-2.11075	5e-05	0.000268034	22.8038	12.9799	22.494	36.2038	2.74789	4.19326	2.27793	4.19994	-1.37975	2.79762e-09	4.5347e-08	12.5786	7.35124	12.2832	21.0015	1.39014	2.29005	1.12186	2.063	-2.09097	6.20866e-13	1.54801e-11	GO:0003682	hypothetical protein;note=predicted by EVM2;note=pfam_scan%3BPfam:PF13873.1%3B%3BE()%3D2.9E-18%3Bscore%3D65.3%3Bque ry 15-93%3Bdescription%3DMyb_DNA-bind_5;Smp_076320	Putative uncharacterized protein [Source:UniProtKB/TrEMBL;Acc:G4LZ63]	_	_
SmVG_007629	7.78498	6.93994	7.19328	6.00088	0.488577	2.64804	0.948669	2.39443	-2.10725	5e-05	0.000268034	2.49144	2.77406	3.47117	2.8223	0.187186	0.203664	0.666824	0.776021	-1.77926	7.75694e-06	5.83415e-05	3.51608	4.24787	3.77403	3.98656	0.341099	0.389109	0.808977	0.750373	-1.95715	3.09723e-12	6.6746e-11
Smp_205400	3.78709	3.90098	3.14205	1.96644	0.844717	1.36105	0.783395	0	-2.09794	0.0008	0.0031153	3.25882	3.48148	2.69428	2.26538	0.319783	0.46456	0.693526	0.110728	-1.36483	0.00178664	0.00675358	2.39257	2.3272	2.20372	1.52608	0.199355	0.314099	0.358449	0.0682646	-2.37112	1.08842e-08	1.09828e-07	GO:0005515	partitioning defective 3;note=iprscan%3BInterPro:IPR001478 : PDZ/DHR/GLGF%3BPfam:PF00595%3B%3Bscore%3D8.9E-7%3Bquery 253-315%3Bdescription%3DPDZ/DHR/GLGF;Smp_205400
Smp_074430	96.577	86.4144	70.129	67.5746	8.86345	24.7581	14.0582	27.4894	-2.09299	5e-05	0.000268034	65.2295	71.4877	51.4559	59.2388	1.51398	7.83199	10.7326	15.5671	-2.03986	4.33352e-05	0.000267767	55.9505	60.1611	44.9707	53.6129	2.13193	6.87854	8.5101	11.8802	-2.04967	6.85062e-10	8.83806e-09	GO:0016020,GO:0016021	hypothetical protein;Smp_074430	Putative uncharacterized protein [Source:UniProtKB/TrEMBL;Acc:G4VLD1]	_	_
SmVG_035759	5.78343	4.17172	4.49381	8.25001	1.46286	1.173	1.28638	1.40238	-2.09188	5e-05	0.000268034	3.01647	4.36518	2.91217	6.49513	0.613329	0.106856	0.799191	0.50958	-1.56671	0.0120017	0.0335218	2.31889	3.08662	2.24487	4.39173	0.324388	0.241898	0.404873	0.263214	-2.43802	5.83229e-10	7.6841e-09
Smp_127280	18.627	19.1081	17.5093	14.8008	2.68763	4.85592	3.24519	5.66799	-2.08961	5e-05	0.000268034	21.2506	20.0317	18.3151	18.3926	1.27679	2.81544	3.18398	4.18341	-1.73544	3.61109e-21	3.49261e-19	12.2805	11.6245	10.328	10.9125	0.660656	1.57088	1.59277	2.13494	-2.11874	6.56357e-20	4.8116e-18	GO:0004144,GO:0005783,GO:0005789,GO:0008374,GO:0016020,GO:0016021,GO:0016740,GO:0016746,GO:0019432	diacylglycerol O-acyltransferase 1;Smp_127280	O-acyltransferase [Source:UniProtKB/TrEMBL;Acc:C4PZS7]	gi|145864459|ref|NP_036211.2|	diacylglycerol O-acyltransferase 1 [Homo sapiens]
Smp_137700	2.99541	2.78231	3.11796	3.13586	0.172883	1.19454	0.404315	1.06037	-2.08687	5e-05	0.000268034	41.8543	47.9407	50.8936	52.5492	1.31668	4.11935	7.5422	10.3938	-2.17194	3.4084e-07	3.45954e-06	23.9442	27.6087	28.4699	31.0739	0.701262	2.30539	3.74207	5.24792	-2.41047	1.30958e-08	1.28733e-07		Zinc finger%2C C2H2 type domain containing protein;Smp_137700	Putative uncharacterized protein [Source:UniProtKB/TrEMBL;Acc:G4VBE3]	_	_
Smp_130250	5.38431	8.5979	6.56228	4.85014	1.47228	1.4333	0.988554	2.10644	-2.08135	5e-05	0.000268034	8.47556	5.94917	6.80111	5.81755	0.906031	1.1337	1.08095	1.80672	-1.46953	2.15786e-22	2.36013e-20	5.16655	3.6408	4.08914	3.63881	0.50606	0.722097	0.606179	1.00805	-1.75446	2.36405e-15	8.77768e-14	GO:0000166,GO:0004672,GO:0004674,GO:0005524,GO:0006468,GO:0016301,GO:0016310,GO:0016772	dual specificity;Smp_130250	Dual specificity kinase [Source:UniProtKB/TrEMBL;Acc:G4VMK2]	gi|4758222|ref|NP_004705.1|	dual specificity tyrosine-phosphorylation-regulated kinase 1B isoform a [Homo sapiens]
Smp_002600	781.831	694.418	690.888	630.57	85.5992	216.575	116.966	251.324	-2.06101	5e-05	0.000268034	793.925	840.775	768.546	761.809	43.7535	92.6099	150.162	166.512	-1.80096	1.48184e-10	3.15308e-09	438.978	468.971	414.823	435.192	21.5236	49.1117	71.004	80.087	-2.15366	1.79187e-12	4.0023e-11	GO:0004180,GO:0004185,GO:0006508,GO:0008236,GO:0008239,GO:0016787	Lysosomal Pro X carboxypeptidase;Smp_002600	Lysosomal Pro-Xaa carboxypeptidase (S28 family) [Source:UniProtKB/TrEMBL;Acc:G4VF49]	gi|62420888|ref|NP_037511.2|	dipeptidyl peptidase 2 preproprotein [Homo sapiens]
Smp_149930	3.83448	4.03279	3.26786	2.01858	0.419432	1.10325	0.546525	1.12112	-2.04369	5e-05	0.000268034	3.62675	3.45952	3.00387	2.32505	0.265833	0.294073	0.640049	0.569627	-1.75638	2.9262e-10	5.88832e-09	2.07078	2.0739	1.65864	1.37671	0.126448	0.199062	0.336988	0.291177	-2.12575	7.65474e-13	1.86519e-11	GO:0005622,GO:0008270,GO:0016020,GO:0016021,GO:0046872,GO:0055085	sodium:potassium:calcium exchanger 6;Smp_149930	Putative na/ca exchanger [Source:UniProtKB/TrEMBL;Acc:G4VI37]	gi|39995086|ref|NP_079235.2|	sodium/potassium/calcium exchanger 6 precursor [Homo sapiens]
Smp_205770	124.43	203.856	197.206	117.878	49.4065	33.1516	30.7285	43.6192	-2.03575	5e-05	0.000268034	119.037	70.0035	107.431	77.1771	16.1971	18.0222	13.2871	21.3163	-1.3112	8.83144e-10	1.61239e-08	119.781	61.4779	101.586	74.7356	11.4714	13.8059	10.4954	16.149	-1.88138	1.36735e-11	2.51669e-10	GO:0016020,GO:0016021	choline transporter protein;note=tmhmm%3B%3Bquery 1-88%3B;note=iprscan%3BPANTHER:PTHR12385:SF8%3B%3Bscore%3D7.8E-16%3Bquery 6-87%3Bdescription%3Dnull;Smp_205770
SmVG_000875:Smp_068180	8.49404	6.40113	6.7365	5.33286	1.08698	1.76749	1.28312	2.44928	-2.0334	0.02055	0.0480873	7.48703	8.80145	7.1898	6.15312	0.86836	1.26253	1.12308	1.62943	-1.52752	3.87138e-14	1.58415e-12	4.24913	5.01486	3.9841	3.58746	0.442427	0.699108	0.552695	0.809494	-1.92953	4.30212e-16	1.84496e-14		protein lysine 6 oxidase;Smp_068180	Lysyl oxidase-like [Source:UniProtKB/TrEMBL;Acc:G4V6Q6]	gi|67782349|ref|NP_115587.6|	lysyl oxidase homolog 4 precursor [Homo sapiens]
SmVG_000875:Smp_159060	8.49404	6.40113	6.7365	5.33286	1.08698	1.76749	1.28312	2.44928	-2.0334	0.02055	0.0480873	7.48703	8.80145	7.1898	6.15312	0.86836	1.26253	1.12308	1.62943	-1.52752	3.87138e-14	1.58415e-12	4.24913	5.01486	3.9841	3.58746	0.442427	0.699108	0.552695	0.809494	-1.92953	4.30212e-16	1.84496e-14		scavenger receptor cysteine rich;Smp_159060	Macrophage scavenger receptor-related [Source:UniProtKB/TrEMBL;Acc:G4V6Q5]	gi|148539842|ref|NP_015568.2|	deleted in malignant brain tumors 1 protein isoform b precursor [Homo sapiens]
Smp_212710	37.4835	40.3594	47.1497	47.1133	7.44086	11.1003	9.09242	14.5736	-2.02773	5e-05	0.000268034	40.5606	34.1112	46.8135	48.7285	3.16357	5.46662	6.0718	7.83239	-1.69795	1.605e-33	4.81623e-31	23.623	19.9686	26.7215	29.2548	1.6723	3.10278	3.10659	4.07984	-2.25242	1.47539e-30	4.08208e-28		gynecophoral canal protein%2C putative;Smp_212710	Putative gynecophoral canal protein [Source:UniProtKB/TrEMBL;Acc:G4VG71]	gi|209862907|ref|NP_006466.2|	periostin isoform 1 [Homo sapiens]
Smp_207040	4.58046	4.80311	4.51016	3.85809	0.283368	1.32914	0.988582	1.75761	-2.026	5e-05	0.000268034	5.22399	4.69074	4.98664	4.60328	0.202849	0.871951	1.2131	1.44613	-1.66696	0.000127261	0.000694655	3.05477	2.73923	2.86979	2.77826	0.139847	0.557522	0.626282	0.767561	-1.67179	1.05669e-07	8.35317e-07	GO:0005509,GO:0005544	annexin;Smp_207040
Smp_014570.2	887.491	785.515	759.36	804.221	84.3969	260.988	134.025	321.116	-2.01545	5e-05	0.000268034	1227.3	1302.14	1217.21	1371.57	45.1411	117.693	193.383	246.47	-2.06874	9.98081e-10	1.79701e-08	711.397	761.11	695.339	821.74	23.8643	66.0867	97.3444	126.415	-2.43411	3.94454e-11	6.63379e-10		Saposin%2CIPR008139 Saposin;note=iprscan%3BInterPro:IPR008138 : Saposin-like type B%2C 2%3BPfam:PF03489%3B%3Bscore%3D7.0E-6%3Bquery 81-115%3Bdescription%3DSaposin-like type B%2C 2;note=iprscan%3BInterPro:IPR011001 : Saposin-like%3BSuperfamily:SSF47862%3B%3Bscore%3D4.7E-10%3Bquery 129-201%3Bdescription%3DSaposin-like;note=iprscan%3BInterPro:IPR011001 : Saposin-like%3BSuperfamily:SSF47862%3B%3Bscor…
Smp_170550	100.465	119.277	118.079	87.3249	19.9629	26.1424	20.4689	39.2251	-2.00663	5e-05	0.000268034	170.683	150.904	175.661	146.955	16.9501	24.9923	27.2583	39.1278	-1.55548	6.47744e-65	2.52685e-61	98.1719	87.5328	98.9131	87.2917	8.95315	14.0841	13.8743	20.1676	-1.91477	1.53431e-21	1.39998e-19		granulin;Smp_170550.2	Putative granulin [Source:UniProtKB/TrEMBL;Acc:G4V750]	gi|4504151|ref|NP_002078.1|	granulins precursor [Homo sapiens]
Smp_130100	1319.44	1238.41	904.131	817.847	152.382	226.638	215.582	477.33	-1.99734	5e-05	0.000268034	1346.87	1475.34	972.173	1010.46	117.536	201.703	221.966	350.545	-1.5232	1.8313e-20	1.57586e-18	781.111	857.168	550.841	602.6	61.2776	113.051	111.445	179.324	-1.77012	5.89043e-11	9.5686e-10	GO:0001664,GO:0005737,GO:0008047,GO:0043085	saposin containing protein;Smp_130100	Saposin containing protein [Source:UniProtKB/TrEMBL;Acc:G4VBU4]	_	_
Smp_145320	4.65879	4.98427	4.69642	5.40137	0.795763	1.55286	0.629067	1.96905	-1.99663	5e-05	0.000268034	6.31912	5.39903	5.83725	7.66347	0.695164	0.740853	1.63184	1.83816	-1.37859	8.80929e-07	8.21475e-06	3.68485	3.16055	3.32746	4.64832	0.39876	0.467051	0.883633	0.969901	-1.61215	8.03569e-09	8.3745e-08	GO:0005254,GO:0005887,GO:0008271,GO:0008272,GO:0015106,GO:0015116,GO:0015301,GO:0015701,GO:0016020,GO:0016021,GO:0019531,GO:0019532,GO:0042391,GO:0051453,GO:0055085,GO:1902358,GO:1902476	solute carrier family 26;Smp_145320	Putative sulfate transporter [Source:UniProtKB/TrEMBL;Acc:G4VIT5]	gi|4557535|ref|NP_000102.1|	chloride anion exchanger [Homo sapiens]
Smp_121930	73.3852	66.8498	62.5592	54.7295	6.53685	23.6373	11.6298	23.2542	-1.9849	5e-05	0.000268034	78.0674	82.0501	71.8491	70.2892	3.69543	9.5311	17.4586	16.8282	-1.76336	1.86448e-06	1.62302e-05	45.0719	47.427	40.9215	42.1188	1.89822	5.33881	8.76859	8.62955	-2.02334	2.16686e-09	2.54591e-08	GO:0016020,GO:0016021	hypothetical protein;Smp_121930	Putative uncharacterized protein [Source:UniProtKB/TrEMBL;Acc:G4VGD0]	_	_
Smp_103610	1480.7	1223.62	1860.47	1578.81	178.33	571.289	239.194	568.667	-1.97987	5e-05	0.000268034	2067.32	2398.23	2794.16	2638.02	129.675	304.562	621.246	725.625	-1.6571	2.06599e-05	0.000139026	1348.02	1570.33	1806.78	1799.64	75.1898	189.527	349.639	416.185	-1.83172	3.6667e-06	1.99298e-05	GO:0004197,GO:0005615,GO:0005764,GO:0006508,GO:0008233,GO:0008234,GO:0016787,GO:0050790,GO:0051603	cathepsin B peptidase (C01 family);Smp_103610	Cathepsin B-like cysteine proteinase [Source:UniProtKB/Swiss-Prot;Acc:P25792]	gi|22538431|ref|NP_680090.1|	cathepsin B preproprotein [Homo sapiens]
Smp_199900	57.766	61.7298	54.2469	47.4926	18.3254	7.47705	9.12626	21.3278	-1.97549	5e-05	0.000268034	47.8662	45.125	43.0517	39.9768	6.94556	4.86124	3.20114	11.5012	-1.71578	9.80968e-07	9.09689e-06	81.5279	64.0203	59.9092	50.8053	8.18389	7.36885	6.85556	10.0227	-2.06417	3.02818e-14	9.17763e-13		phospholipid transport protein;Smp_199900	Phospholipid transport protein [Source:UniProtKB/TrEMBL;Acc:G4M251]	_	_
Smp_194910	10029.8	8332.4	7717.56	7540.17	865.976	2373.26	1534.29	3918.85	-1.95149	5e-05	0.000268034	6582.36	7567.47	5999.47	6485.41	311.183	878.108	1150.9	1872.53	-1.82522	1.58813e-09	2.73725e-08	4029.16	4675.52	3647.49	4116.74	178.256	532.476	643.615	1043.08	-1.99883	1.03803e-07	8.23604e-07		Saposin B domain containing protein;Smp_194910	Putative uncharacterized protein [Source:UniProtKB/TrEMBL;Acc:G4VHH1]	_	_
Smp_049850	3.77029	4.59717	4.5735	3.4926	0.848711	1.56084	0.909692	0.933259	-1.95026	5e-05	0.000268034	4.27601	3.43905	4.14358	3.17922	0.527668	0.767442	1.27175	0.665907	-1.14388	1.88353e-07	2.03724e-06	3.12317	2.56907	2.97126	2.47657	0.46355	0.676804	0.929565	0.462719	-1.32595	6.89914e-08	5.67344e-07	GO:0000287,GO:0004422,GO:0005829,GO:0006168,GO:0006178,GO:0009116,GO:0016020,GO:0016021,GO:0016740,GO:0016757,GO:0032263,GO:0032264,GO:0046100,GO:0052657	hypoxanthine guanine phosphoribosyltransferase;Smp_049850	Hypoxanthine-guanine phosphoribosyltransferase,putative [Source:UniProtKB/TrEMBL;Acc:G4LWP0]	gi|9910262|ref|NP_064585.1|	phosphoribosyltransferase domain-containing protein 1 [Homo sapiens]
Smp_050520	14.0701	17.4324	14.4377	13.5054	3.46875	4.50108	2.47801	4.94067	-1.94972	5e-05	0.000268034	17.3075	13.3264	13.8118	14.4656	1.49271	1.87095	2.83949	2.92559	-1.55414	4.96315e-17	2.99401e-15	9.90706	7.67567	7.7258	8.50989	0.771419	1.0279	1.43144	1.46171	-2.01251	1.83028e-22	1.98713e-20	GO:0005509,GO:0005515,GO:0007154,GO:0007275,GO:0016020,GO:0016021	neurogenic locus notch protein;Smp_050520	Notch [Source:UniProtKB/TrEMBL;Acc:G4VH90]	gi|134244285|ref|NP_000426.2|	neurogenic locus notch homolog protein 3 precursor [Homo sapiens]
Smp_125190	5.05441	7.23309	6.41235	4.88121	1.07793	1.07518	0.588	3.37119	-1.94784	0.01475	0.0362599	9.42367	10.1313	9.51824	9.90519	1.03346	1.18491	0.891007	3.16679	-1.65039	0.00146602	0.0057285	5.42592	5.91216	5.58201	5.91438	0.601521	0.921866	0.492112	1.73984	-1.78741	2.46066e-06	1.40233e-05		hypothetical protein;Smp_125190	Putative uncharacterized protein [Source:UniProtKB/TrEMBL;Acc:G4V745]	_	_
Smp_074190	2.98905	3.723	3.4879	3.30816	0.637331	0.64848	0.851897	1.36914	-1.94558	5e-05	0.000268034	4.23568	3.46392	3.94634	4.39339	0.64997	0.997729	0.614587	1.06162	-1.22169	3.7053e-16	2.02631e-14	2.40108	1.97861	2.18773	2.58359	0.336318	0.558646	0.301635	0.524761	-1.57805	2.82085e-20	2.19949e-18		LIN 24 (Twenty four) Like family member;Smp_074190	Putative uncharacterized protein [Source:UniProtKB/TrEMBL;Acc:G4VLA4]	_	_
Smp_196950	3.60508	5.06055	5.31585	8.4847	1.90635	0.894182	1.25082	1.81764	-1.93657	5e-05	0.000268034	3.89797	2.72387	4.07357	7.07509	0.667641	0.720332	0.454068	0.880303	-1.3222	6.80659e-09	1.02784e-07	2.34712	1.64478	2.42121	4.39436	0.37978	0.426818	0.245138	0.479488	-1.99465	9.02829e-12	1.75194e-10	GO:0001077,GO:0003677,GO:0003700,GO:0005634,GO:0006351,GO:0006355,GO:0006366,GO:0030154,GO:0043565,GO:0045944,GO:0048731	one cut domain family member;Smp_196950	Putative one cut domain family member [Source:UniProtKB/TrEMBL;Acc:G4V957]	gi|116517292|ref|NP_056082.2|	homeobox protein cut-like 2 [Homo sapiens]
Smp_011680	73.6713	78.1857	88.8584	73.0782	15.7273	24.3204	14.7049	27.6935	-1.92829	5e-05	0.000268034	94.6003	87.8889	106.623	101.981	10.5406	14.0366	19.7892	21.5787	-1.46848	1.85414e-19	1.43702e-17	54.0429	50.4392	59.6366	60.0419	5.32714	7.685	9.70583	10.8157	-1.90489	2.41045e-23	2.85546e-21	GO:0007155,GO:0016020,GO:0016021	CD36 class B scavenger receptor;Smp_011680	CD36-like class B scavenger receptor [Source:UniProtKB/TrEMBL;Acc:G4VSZ3]	_	_
Smp_204050	2.9583	2.38676	3.45079	3.25058	0.18618	1.55926	0.721424	0.708506	-1.92361	5e-05	0.000268034	4.48253	4.52102	5.06441	4.57278	0.231489	0.937078	1.07186	1.00256	-1.58733	2.05969e-05	0.000138692	3.06002	3.11983	3.20766	3.22324	0.156236	0.597734	0.791104	0.645719	-1.75644	8.24692e-09	8.55307e-08	GO:0004672,GO:0004674,GO:0005524,GO:0005622,GO:0006468,GO:0016772,GO:0018105,GO:0035556	serine:threonine protein kinase Sgk1;note=iprscan%3BPANTHER:PTHR22985:SF70%3B%3Bscore%3D6.3E-91%3Bquery 2-152%3Bdescription%3Dnull;note=iprscan%3BInterPro:IPR017442 : Serine/threonine protein kinase-related%3BPfam:PF00069%3B%3Bscore%3D5.9E-45%3Bquery 2-152%3Bdescription%3DSerine/threonine protein kinase-related;Smp_204050	Putative uncharacterized protein Smp_204050 [Source:UniProtKB/TrEMBL;Acc:G4VP53]	gi|31563382|ref|NP_037389.4|	serine/threonine-protein kinase Sgk3 isoform 1 [Homo sapiens]
SmVG_025079:Smp_086110	2.43399	3.21861	1.94306	1.44459	0.625738	0.512477	0.393277	0.85698	-1.92028	5e-05	0.000268034	3.69672	2.69472	2.56231	1.99627	0.3553	0.413394	0.4775	0.674884	-1.51922	1.55119e-13	5.63776e-12	2.19844	1.63332	1.49646	1.23481	0.189384	0.252556	0.266193	0.355407	-1.81205	2.08359e-11	3.67715e-10		hypothetical protein;Smp_086110	Putative uncharacterized protein [Source:UniProtKB/TrEMBL;Acc:G4VNN4]	_	_
SmVG_025079:Smp_168970	2.43399	3.21861	1.94306	1.44459	0.625738	0.512477	0.393277	0.85698	-1.92028	5e-05	0.000268034	3.69672	2.69472	2.56231	1.99627	0.3553	0.413394	0.4775	0.674884	-1.51922	1.55119e-13	5.63776e-12	2.19844	1.63332	1.49646	1.23481	0.189384	0.252556	0.266193	0.355407	-1.81205	2.08359e-11	3.67715e-10		multiple pdz domain protein;Smp_168970	Discs lost-related [Source:UniProtKB/TrEMBL;Acc:G4VNN6]	gi|148746189|ref|NP_003820.2|	multiple PDZ domain protein [Homo sapiens]
SmVG_008860:Smp_134620	19.9602	27.7696	21.9496	17.5074	4.73498	4.15574	5.74299	8.47212	-1.91585	5e-05	0.000268034	24.2256	16.0637	18.8272	16.1159	1.79006	3.43615	2.18814	4.10615	-1.65772	7.18103e-35	2.4832e-32	14.0349	9.37257	10.6946	9.638	0.930036	1.96126	1.13469	2.09169	-2.04846	1.34221e-21	1.23787e-19		monocarboxylate transporter;Smp_134620	Putative monocarboxylate transporter [Source:UniProtKB/TrEMBL;Acc:G4VCC5]	_	_
SmVG_008860:Smp_169100	19.9602	27.7696	21.9496	17.5074	4.73498	4.15574	5.74299	8.47212	-1.91585	5e-05	0.000268034	24.2256	16.0637	18.8272	16.1159	1.79006	3.43615	2.18814	4.10615	-1.65772	7.18103e-35	2.4832e-32	14.0349	9.37257	10.6946	9.638	0.930036	1.96126	1.13469	2.09169	-2.04846	1.34221e-21	1.23787e-19		monocarboxylate transporter;note=tmhmm%3B%3Bquery 1-113%3B;note=%3Bquery 1-34%3B;note=%3Bquery 95-113%3B;note=%3Bquery 35-57%3B;note=%3Bquery 72-94%3B;note=%3Bquery 58-71%3B;Smp_169100	Putative uncharacterized protein [Source:UniProtKB/TrEMBL;Acc:G4VCC6]	_	_
Smp_139240	1549.81	1312.01	1254.03	1354.77	141.409	514.635	225.845	568.02	-1.91574	5e-05	0.000268034	1037.54	1168.48	966.07	1159.23	50.3222	126.443	248.493	262.023	-1.74216	6.56754e-06	5.00716e-05	644.625	726.335	588.464	739.003	28.9343	77.1454	135.781	146.735	-1.97321	1.0645e-07	8.39943e-07	GO:0004197,GO:0005615,GO:0005764,GO:0006508,GO:0008234,GO:0016020,GO:0016021,GO:0051603	cathepsin S (C01 family);Smp_139240	Peptidase C1 family [Source:UniProtKB/TrEMBL;Acc:G4LUT7]	gi|23110962|ref|NP_004070.3|	cathepsin S isoform 1 preproprotein [Homo sapiens]
Smp_016600	3.82343	4.7032	3.54281	2.69713	0.832325	0.609804	0.94849	1.54133	-1.90902	5e-05	0.000268034	42.3656	48.8561	38.8477	33.8204	3.66764	5.54391	7.42589	9.37548	-1.65825	1.09395e-23	1.52411e-21	24.7546	28.7032	22.073	20.259	1.935	3.19136	3.82168	4.93498	-1.96776	5.24242e-16	2.21499e-14	GO:0006810,GO:0006835,GO:0015293,GO:0016020,GO:0016021,GO:0017153,GO:0055085	solute carrier family 1;Smp_016600	Putative solute carrier family 1 (Glial high affinity glutamate transporter) [Source:UniProtKB/TrEMBL;Acc:G4VKW8]	gi|169790839|ref|NP_004163.3|	excitatory amino acid transporter 1 isoform 1 [Homo sapiens]
Smp_132270	22.5722	29.815	17.536	14.101	4.68308	4.78706	4.38625	8.60156	-1.90358	5e-05	0.000268034	22.3825	16.8445	13.0476	11.9394	1.69368	2.57036	2.37514	3.98258	-1.61715	6.46815e-27	1.14692e-24	13.3483	10.1013	7.65882	7.34608	0.940646	1.50199	1.24875	2.09922	-1.93994	7.36039e-15	2.54557e-13	GO:0003676,GO:0003723	poly(rC) binding protein 3;Smp_132270	Putative poly(Rc) binding protien [Source:UniProtKB/TrEMBL;Acc:G4VGP4]	gi|222352151|ref|NP_006187.2|	poly(rC)-binding protein 1 [Homo sapiens]
SmVG_022099:Smp_127880	11.5943	10.7644	9.77559	10.0967	1.11775	2.99292	1.99213	5.20103	-1.90149	5e-05	0.000268034	12.2995	11.6788	11.6609	11.9903	1.10376	1.66907	1.80745	3.47136	-1.62233	1.04341e-20	9.39312e-19	7.32371	7.12421	6.85061	7.39591	0.630568	0.986196	0.971559	1.87928	-1.89449	3.12937e-13	8.18311e-12		hypothetical protein;note=pfam_scan%3BPfam:PF08557.5%3B%3BE()%3D4.8E-5%3Bscore%3D22.3%3Bquer y 23-36%3Bdescription%3DLipid_DES;Smp_127880
SmVG_022099:Smp_145900	11.5943	10.7644	9.77559	10.0967	1.11775	2.99292	1.99213	5.20103	-1.90149	5e-05	0.000268034	12.2995	11.6788	11.6609	11.9903	1.10376	1.66907	1.80745	3.47136	-1.62233	1.04341e-20	9.39312e-19	7.32371	7.12421	6.85061	7.39591	0.630568	0.986196	0.971559	1.87928	-1.89449	3.12937e-13	8.18311e-12		sphingolipid delta(4) desaturase:C4 hydroxylase;Smp_145900
Smp_145510	18.7846	18.0484	17.5731	14.7398	2.24381	6.45916	4.61008	5.24593	-1.89753	5e-05	0.000268034	31.6352	29.3781	30.5508	28.9984	1.61086	5.5456	8.29334	4.70889	-1.54369	7.6472e-05	0.000444145	18.4044	17.1791	17.4623	17.3673	0.830353	3.09872	4.15295	2.39636	-1.96345	1.8373e-10	2.62206e-09	GO:0000164,GO:0005515,GO:0046579	leucine rich repeat protein soc 2;Smp_145510	Putative shoc2 [Source:UniProtKB/TrEMBL;Acc:G4VIX9]	gi|21361633|ref|NP_060238.3|	leucine-rich repeat-containing protein 40 [Homo sapiens]
Smp_103670	13.6855	10.0964	9.51313	7.12968	2.67126	3.7973	1.82772	2.59988	-1.89142	0.0001	0.000501375	12.4859	13.2981	11.8447	9.20203	1.299	2.43602	2.54123	2.67954	-1.31816	1.37197e-05	9.67242e-05	7.51631	8.17717	7.04635	5.85851	0.726165	1.56179	1.36982	1.45248	-1.63778	3.76793e-08	3.2977e-07	GO:0005737,GO:0017089,GO:0046836,GO:0051861	glycolipid transfer protein;Smp_103670
Smp_197370	47.1642	64.2296	63.1742	46.3147	15.8401	13.8544	10.357	19.6616	-1.88716	5e-05	0.000268034	88.0606	57.9488	79.8105	61.5095	10.591	10.3243	11.5333	16.5824	-1.48838	6.5725e-16	3.46478e-14	43.324	29.2533	38.0601	31.7829	4.67724	4.95903	4.85579	6.87039	-1.86482	2.12749e-19	1.44822e-17	GO:0005201,GO:0005578,GO:0005581	hypothetical protein;Smp_197370	Putative uncharacterized protein [Source:UniProtKB/TrEMBL;Acc:G4VFE1]	gi|89276751|ref|NP_000084.3|	collagen alpha-1(V) chain preproprotein [Homo sapiens]
Smp_105420	16584.2	14523.7	12615.7	11775.9	2132	4206.47	2767.47	5901.04	-1.88684	5e-05	0.000268034	12333.4	13566.4	10410.1	10865.4	861.52	1702.87	2224.54	2970.07	-1.62374	5.22188e-15	2.41548e-13	7344.84	8184.78	6132.77	6718.96	477.709	1008.92	1192.93	1611.42	-1.91545	1.041e-11	1.97974e-10	GO:0001664,GO:0005737,GO:0006629,GO:0008047,GO:0043085	Saposin%2CIPR008139 Saposin;Smp_105420	Saposin containing protein [Source:UniProtKB/TrEMBL;Acc:G4VC43]	_	_
Smp_077610	134.696	119.487	113.269	109.822	16.4102	40.1858	23.3499	49.3095	-1.8846	5e-05	0.000268034	117.862	124.152	107.228	111.163	6.4887	14.9759	21.4944	25.8477	-1.75126	4.62894e-11	1.07699e-09	71.4832	75.3307	64.2025	70.802	3.61542	8.96662	11.6967	14.4833	-2.08112	4.95209e-13	1.25292e-11	GO:0016020,GO:0016021	hypothetical protein;Smp_077610	Putative uncharacterized protein [Source:UniProtKB/TrEMBL;Acc:G4VL55]	_	_
Smp_137580	7.20795	9.66103	8.92128	8.4726	1.82303	2.46122	2.01883	3.04983	-1.87316	5e-05	0.000268034	12.768	9.12713	11.3525	11.2946	1.08233	2.05889	1.89914	2.67531	-1.47975	2.25394e-35	8.50897e-33	7.1311	5.15372	6.21939	6.56696	0.552373	1.15766	0.96262	1.31266	-1.84456	3.27474e-25	5.10681e-23	GO:0003676,GO:0004386,GO:0005524,GO:0008026,GO:0016787,GO:0016818	helicase ski2w;Smp_137580	Helicase, putative [Source:UniProtKB/TrEMBL;Acc:G4LX09]	gi|67782311|ref|NP_008860.4|	helicase SKI2W [Homo sapiens]
Smp_131020	11.8636	16.8046	12.1752	9.36208	4.15338	2.77288	2.11726	4.74647	-1.86422	5e-05	0.000268034	15.8142	11.7545	11.9065	10.9508	1.6751	1.6209	1.61338	3.06241	-1.6278	4.20549e-22	4.43395e-20	9.34795	6.98338	6.92997	6.67462	0.880612	0.923568	0.82689	1.60636	-1.9762	1.04742e-15	4.15914e-14	GO:0016020,GO:0016021	transmembrane and TPR repeat containing protein;Smp_131020	Putative uncharacterized protein [Source:UniProtKB/TrEMBL;Acc:G4VHF1]	_	_
Smp_211020	4.52463	5.7454	4.30434	4.33427	1.72649	0.964402	1.12221	1.44455	-1.84656	5e-05	0.000268034	5.08173	4.01098	3.56399	4.07977	0.766209	0.645472	0.614236	0.739385	-1.37419	1.38668e-10	2.98315e-09	2.97608	2.35315	2.04807	2.48374	0.428184	0.37368	0.323482	0.393478	-1.88272	1.91042e-15	7.18668e-14	GO:0007155,GO:0016020,GO:0016021,GO:0070492	cell adhesion molecule;Smp_211020	_	gi|105990535|ref|NP_000121.2|	coagulation factor V precursor [Homo sapiens]
Smp_164590	15.7881	21.96	24.6095	17.6141	5.22858	4.72073	4.28331	8.08463	-1.84133	5e-05	0.000268034	29.9794	19.9336	31.1843	24.5288	3.45643	4.51667	4.24202	7.15707	-1.44409	1.3033e-22	1.49534e-20	16.0452	10.8905	16.347	13.7401	1.69346	2.37424	2.00394	3.35575	-1.78158	2.50364e-17	1.28585e-15	GO:0005201,GO:0005515,GO:0005578,GO:0005581	fibrillar collagen chain FAp1 alpha;Smp_164590	Putative collagen alpha-1(V) chain [Source:UniProtKB/TrEMBL;Acc:G4VFE0]	gi|98985810|ref|NP_542196.2|	collagen alpha-1(XI) chain isoform B preproprotein [Homo sapiens]
SmVG_023508:Smp_011990	45.7442	46.7831	54.1643	41.1861	11.7944	12.9634	10.9567	17.0366	-1.83252	5e-05	0.000268034	58.3609	56.4653	63.9384	55.5433	5.98837	9.7516	10.0155	11.6325	-1.51597	8.3356e-57	1.21939e-53	33.3323	32.5685	36.1282	32.7968	3.12772	5.48594	5.12057	5.98339	-1.98399	2.24184e-40	1.74803e-37		beta galactosidase;Smp_011990	Putative beta-galactosidase [Source:UniProtKB/TrEMBL;Acc:G4VRZ7]	gi|40255043|ref|NP_078782.3|	beta-galactosidase-1-like protein precursor [Homo sapiens]
SmVG_023508:Smp_177540	45.7442	46.7831	54.1643	41.1861	11.7944	12.9634	10.9567	17.0366	-1.83252	5e-05	0.000268034	58.3609	56.4653	63.9384	55.5433	5.98837	9.7516	10.0155	11.6325	-1.51597	8.3356e-57	1.21939e-53	33.3323	32.5685	36.1282	32.7968	3.12772	5.48594	5.12057	5.98339	-1.98399	2.24184e-40	1.74803e-37		beta galactosidase;Smp_177540	Putative uncharacterized protein [Source:UniProtKB/TrEMBL;Acc:G4VRZ8]	gi|40255043|ref|NP_078782.3|	beta-galactosidase-1-like protein precursor [Homo sapiens]
Smp_146720	13.7445	15.5226	19.2436	15.2605	3.74861	5.08836	3.31935	6.00296	-1.8122	5e-05	0.000268034	16.6114	15.7465	21.0823	19.0088	2.02238	2.82381	3.86544	4.48016	-1.40493	4.43073e-16	2.4006e-14	9.55862	9.11668	11.9386	11.3077	1.05421	1.5678	1.95926	2.29009	-1.79636	5.87393e-19	3.75975e-17	GO:0005515,GO:0016020,GO:0016021	tissue type plasminogen activator;Smp_146720	Putative uncharacterized protein [Source:UniProtKB/TrEMBL;Acc:G4VK82]	_	_
Smp_155050	14.8917	17.2109	15.1782	11.5678	3.80222	3.85811	3.80595	5.3444	-1.80763	5e-05	0.000268034	14.7608	11.5461	12.4088	9.90611	1.20773	1.68084	1.54205	2.32121	-1.736	3.33141e-60	5.56964e-57	8.60804	7.0018	7.20719	6.32035	0.795358	1.26955	1.06559	1.37349	-1.91307	3.36865e-33	1.20387e-30	GO:0005515	agrin;Smp_155050	Agrin, putative [Source:UniProtKB/TrEMBL;Acc:G4LY67]	gi|54873613|ref|NP_940978.2|	agrin precursor [Homo sapiens]
SmVG_036118	3.18036	3.45111	2.71846	2.1082	0.682719	0.791626	0.186849	1.62568	-1.80158	0.0003	0.00132569	3.72364	4.26272	2.95331	2.90393	0.301569	0.219207	0.325293	0.683893	-2.05266	1.95559e-08	2.64581e-07	2.46	2.89009	1.87727	2.04215	0.217764	0.173296	0.184793	0.403658	-2.41868	8.90862e-13	2.12839e-11
Smp_213430	12.3356	13.6731	10.2059	12.3136	2.50433	3.49784	3.84549	4.11155	-1.79761	5e-05	0.000268034	11.921	10.6305	9.20746	11.4499	0.983598	2.36969	2.18189	2.81757	-1.35664	2.96692e-13	1.02123e-11	9.23511	8.12159	6.55209	8.63857	0.757565	1.82456	1.28028	1.92397	-1.73038	1.20407e-15	4.69424e-14		hypothetical protein;Smp_213430
Smp_176610	73.5653	92.2588	77.2214	61.6635	18.0081	15.6228	19.4385	35.6744	-1.77971	5e-05	0.000268034	72.7837	55.8489	59.8861	53.004	6.43351	11.1815	7.48142	16.5923	-1.60062	5.62216e-65	2.52685e-61	43.3136	33.2372	34.8942	32.3064	3.46755	6.39735	3.91337	8.7857	-1.89709	7.54791e-16	3.11242e-14	GO:0005515	BTB:POZ domain containing protein;Smp_176610	Btb/poz domain containing protein, putative [Source:UniProtKB/TrEMBL;Acc:G4LUY1]	_	_
Smp_154670	33.9621	35.2767	26.1854	26.6301	5.33652	7.61161	7.53008	15.2593	-1.77201	5e-05	0.000268034	27.4139	25.7827	19.9433	22.6998	1.96466	4.26088	3.77052	7.12747	-1.59059	1.01965e-27	2.02254e-25	15.8767	14.9615	11.3496	13.5194	1.02969	2.44456	1.97107	3.68975	-1.81943	5.32211e-12	1.10795e-10	GO:0003829,GO:0008109,GO:0008375,GO:0016020,GO:0016740,GO:0016757	glycosyltransferase 14 family member;Smp_154670	Putative glycosyltransferase 14 family member [Source:UniProtKB/TrEMBL;Acc:G4V6I1]	gi|21614523|ref|NP_001481.2|	beta-1,3-galactosyl-O-glycosyl-glycoprotein beta-1,6-N-acetylglucosaminyltransferase [Homo sapiens]
Smp_125210	4.13247	7.02929	6.19637	3.67212	0.728744	1.06727	1.64783	2.79291	-1.7536	5e-05	0.000268034	4.90599	2.87653	4.3128	2.95362	0.214752	0.99035	0.493067	1.11308	-1.65791	7.149e-07	6.79648e-06	3.03719	1.7927	2.64895	1.8468	0.123219	0.661482	0.284589	0.637578	-1.71886	9.66801e-07	6.09276e-06	GO:0005215,GO:0005887,GO:0006810,GO:0006833,GO:0009992,GO:0015204,GO:0015250,GO:0015254,GO:0015793,GO:0016020,GO:0016021,GO:0034220,GO:0071918	Aquaporin 9 (AQP 9) (Small solute channel 1);Smp_125210
Smp_000500	29.9175	26.3501	24.7403	24.5854	13.0198	5.44642	5.91971	6.93454	-1.75334	0.0002	0.000928806	21.3984	20.2464	17.1389	20.4568	5.74667	2.67965	2.00028	3.18125	-1.27986	0.00175706	0.00666975	12.8051	12.5349	10.2954	12.5541	3.03161	1.56004	1.04309	1.695	-1.76405	6.00717e-07	3.95422e-06		hypothetical protein;Smp_000500	Putative uncharacterized protein [Source:UniProtKB/TrEMBL;Acc:G4LYI4]	_	_
SmVG_016638	7.99541	9.09319	9.33073	5.91429	2.68431	1.62489	2.18168	3.1044	-1.75264	5e-05	0.000268034	6.33746	5.10206	5.8077	4.29113	0.795662	0.910916	0.643659	1.39272	-1.53157	2.30982e-10	4.75076e-09	6.45596	4.80418	5.51788	4.2378	0.763166	0.98341	0.641809	1.26685	-1.65504	7.02302e-11	1.11756e-09	GO:0006950
Smp_130070	3.96527	4.04092	3.7849	3.35186	0.683789	1.19408	0.95226	1.67349	-1.74949	5e-05	0.000268034	3.7224	3.62758	3.64007	3.3729	0.257464	0.674033	0.759078	0.8764	-1.53149	2.30316e-11	5.67451e-10	2.1497	2.11349	2.06783	2.00371	0.133881	0.37889	0.382024	0.440175	-1.8704	9.27641e-15	3.10796e-13	GO:0005515,GO:0016020,GO:0016021	nephrin;Smp_130070	Putative nephrin [Source:UniProtKB/TrEMBL;Acc:G4VBT7]	gi|4758822|ref|NP_004637.1|	nephrin precursor [Homo sapiens]
SmVG_008628	474.941	412.511	487.476	432.996	83.496	147.925	74.8929	235.772	-1.73774	5e-05	0.000268034	369.827	403.242	448.903	418.142	33.6602	46.6772	78.2659	122.69	-1.62138	1.1689e-13	4.32901e-12	222.139	245.143	266.271	258.608	18.3881	27.5401	41.1486	65.6842	-1.82994	2.58927e-09	2.98172e-08
Smp_170110	36.8626	58.8985	53.2692	46.2237	11.6612	13.7019	13.1082	20.0846	-1.73747	5e-05	0.000268034	58.3334	34.5029	50.5149	47.6749	5.91163	9.68014	8.28777	12.1099	-1.34766	4.61537e-20	3.83076e-18	34.2345	20.4103	29.1861	29.1799	3.02612	5.51652	4.29788	6.36549	-1.74425	2.92523e-20	2.24015e-18	GO:0003676,GO:0003723	high density lipoprotein binding protein;Smp_170110	High-density lipoprotein receptor (Hdl) [Source:UniProtKB/TrEMBL;Acc:G4LXW3]	gi|42716280|ref|NP_976221.1|	vigilin [Homo sapiens]
Smp_161220	39.4586	37.1152	36.1159	30.5055	12.8209	10.7699	9.12285	11.0077	-1.71157	5e-05	0.000268034	38.9926	38.5369	35.9524	34.7989	5.57255	7.23334	6.6349	6.7245	-1.31269	2.06232e-24	3.05511e-22	23.4835	23.7445	21.3143	21.7561	3.13797	4.35264	3.64405	3.6946	-1.82061	8.58467e-36	3.8753e-33	GO:0005783,GO:0009058,GO:0016020,GO:0016021,GO:0016788,GO:0016844	adipocyte plasma membrane associated protein;Smp_161220	Strictosidine synthase-related [Source:UniProtKB/TrEMBL;Acc:G4VCY0]	gi|24308201|ref|NP_065392.1|	adipocyte plasma membrane-associated protein [Homo sapiens]
SmVG_030219:Smp_000520	10.5354	12.9281	12.3713	10.0917	2.81713	2.95952	3.67787	4.67115	-1.70101	5e-05	0.000268034	12.4192	10.0293	11.8747	11.0551	1.2385	2.55625	1.90479	2.78532	-1.40191	6.3692e-51	7.45388e-48	7.29036	5.97434	6.8741	6.77005	0.663979	1.50261	1.01503	1.50547	-1.75135	4.08715e-25	6.15009e-23		hypothetical protein;Smp_000520	Putative uncharacterized protein [Source:UniProtKB/TrEMBL;Acc:G4LYI2]	_	_
SmVG_030219:Smp_000530	10.5354	12.9281	12.3713	10.0917	2.81713	2.95952	3.67787	4.67115	-1.70101	5e-05	0.000268034	12.4192	10.0293	11.8747	11.0551	1.2385	2.55625	1.90479	2.78532	-1.40191	6.3692e-51	7.45388e-48	7.29036	5.97434	6.8741	6.77005	0.663979	1.50261	1.01503	1.50547	-1.75135	4.08715e-25	6.15009e-23		zinc finger transcription factor gli2;Smp_000530	Zinc finger transcription factor gli2 [Source:UniProtKB/TrEMBL;Acc:G4LYI1]	_	_
Smp_020080	31.9598	33.867	28.2414	22.2039	5.53801	12.1308	5.4393	12.7524	-1.69704	5e-05	0.000268034	48.7305	46.157	39.5107	36.4735	3.76354	6.27976	10.8172	11.2138	-1.5049	3.1131e-09	4.97034e-08	28.3831	27.2705	22.7166	22.2277	1.99939	3.59858	5.5643	5.88	-1.75733	4.51207e-11	7.52919e-10	GO:0000166,GO:0001664,GO:0003924,GO:0004871,GO:0005525,GO:0005834,GO:0006184,GO:0007165,GO:0007186,GO:0007188,GO:0019001,GO:0031683	GTP binding protein (I) alpha subunit alpha;Smp_020080	Putative gtp-binding protein (I) alpha-1subunit, gnai1 [Source:UniProtKB/TrEMBL;Acc:G4V8F6]	gi|4504051|ref|NP_002064.1|	guanine nucleotide-binding protein G(z) subunit alpha [Homo sapiens]
Smp_126420	5.51729	6.15143	4.94363	4.75536	2.9128	0.688558	0.989034	2.01239	-1.69429	5e-05	0.000268034	5.13555	3.98756	3.98782	4.1983	1.15141	0.623458	0.359398	0.946907	-1.45251	0.00079261	0.00338443	2.88485	2.22361	2.201	2.39239	0.525654	0.339034	0.125372	0.466452	-1.82057	4.74132e-08	4.03836e-07	GO:0016020,GO:0016021	hypothetical protein;note=predicted by EVM2;note=tmhmm%3B%3Bquery 1-593%3B;note=%3Bquery 276-593%3B;note=%3Bquery 253-275%3B;note=%3Bquery 1-252%3B;Smp_126420	Putative uncharacterized protein [Source:UniProtKB/TrEMBL;Acc:G4V5P2]	_	_
Smp_130260	28.3721	31.307	30.1744	23.571	7.10959	7.39745	7.64069	12.9166	-1.69366	5e-05	0.000268034	31.0296	25.2956	28.3175	24.1706	2.82367	5.00366	3.89726	6.62086	-1.56216	2.98785e-62	8.74171e-59	18.2964	15.0398	16.3286	14.7217	1.54587	2.89448	2.06864	3.58881	-1.89631	3.86317e-23	4.41793e-21	GO:0005515	hypothetical protein;Smp_130260	Putative uncharacterized protein [Source:UniProtKB/TrEMBL;Acc:G4VMK3]	_	_
Smp_123290	102.447	109.301	113.859	101.075	25.4815	31.8462	27.6071	47.5378	-1.68747	5e-05	0.000268034	96.374	85.4869	96.3674	95.0207	10.5164	17.2828	17.0871	24.5039	-1.41264	5.82175e-62	1.13553e-58	55.631	49.6847	54.6287	56.7158	5.54907	9.7277	8.74024	12.723	-1.77713	4.24229e-23	4.78765e-21	GO:0000166,GO:0001932,GO:0004672,GO:0004674,GO:0004692,GO:0005524,GO:0005952,GO:0006468,GO:0008603,GO:0016301,GO:0016310,GO:0016740,GO:0016772	cGMP dependent protein kinase;Smp_123290	Serine/threonine kinase [Source:UniProtKB/TrEMBL;Acc:G4VLL9]	gi|5453978|ref|NP_006250.1|	cGMP-dependent protein kinase 2 [Homo sapiens]
Smp_020070	44.89	68.5442	54.8996	40.7708	12.4493	11.6866	12.3055	28.5334	-1.68627	5e-05	0.000268034	64.1465	39.955	50.4658	41.8932	5.4827	8.3362	6.86043	15.6998	-1.57022	4.24485e-35	1.55242e-32	37.8734	23.7734	29.251	25.5434	2.99098	4.82158	3.58705	8.27717	-1.77485	7.16527e-11	1.13598e-09		hypothetical protein;Smp_020070	Putative uncharacterized protein [Source:UniProtKB/TrEMBL;Acc:G4V8F8]	_	_
SmVG_035348	5.94337	7.56511	8.42679	11.8685	1.92289	2.37829	3.19257	3.0193	-1.685	5e-05	0.000268034	12.3588	10.9161	15.4416	21.5928	2.20617	5.13484	3.65741	4.23458	-0.860638	7.04585e-09	1.05851e-07	7.70893	7.21412	9.3407	13.6764	1.3727	3.34905	2.47265	2.45211	-1.13175	2.22957e-08	2.05845e-07
Smp_124760	11.7871	16.8001	14.0638	11.4839	3.47368	3.92027	3.6909	5.75875	-1.68436	5e-05	0.000268034	14.9377	9.95406	12.28	11.0853	1.39073	2.41412	2.1223	3.05224	-1.41065	7.21428e-35	2.4832e-32	8.48732	5.7344	6.85288	6.51094	0.730401	1.33536	1.06105	1.54263	-1.75904	7.01476e-21	5.95699e-19		hypothetical protein;Smp_124760	Putative uncharacterized protein [Source:UniProtKB/TrEMBL;Acc:G4M1M7]	_	_
Smp_070240	4.69183	9.22118	8.31073	2.7593	3.25694	0.843293	1.0981	2.58449	-1.68258	5e-05	0.000268034	17.1501	11.3329	15.1358	6.84644	3.05447	2.57066	2.83376	4.35046	-1.15755	5.57428e-08	6.90326e-07	10.0074	6.71859	8.7363	4.18524	1.66614	1.49706	1.62293	2.33648	-1.23597	0.000231491	0.000782926	GO:0016020,GO:0016021	venom allergen-like (VAL) 7 protein;Smp_070240
SmVG_020689	7.01428	9.79094	9.77593	8.7261	2.9179	1.36061	2.15392	4.60462	-1.67761	0.00015	0.000719901	8.58851	6.96991	9.27762	10.3502	1.38778	2.41456	0.805546	2.40159	-1.26346	0.000173903	0.000911007	5.31693	4.36616	5.54879	6.47363	0.974219	1.55764	0.472006	1.25258	-1.47375	9.01793e-08	7.23543e-07
Smp_143680	2.8331	3.26451	3.57185	3.21039	0.7139	1.08711	0.852662	1.37508	-1.67671	5e-05	0.000268034	3.27746	2.69691	3.49183	3.25368	0.387041	0.615231	0.641555	0.808958	-1.3329	4.17171e-21	4.00177e-19	1.86572	1.55718	1.94243	1.91353	0.201091	0.343232	0.33069	0.408624	-1.71422	5.23478e-21	4.5815e-19		laminin subunit;Smp_143680	_	gi|28559088|ref|NP_000417.2|	laminin subunit alpha-2 isoform a precursor [Homo sapiens]
Smp_071610	270.06	248.114	244.384	225.355	61.9438	85.1058	64.229	98.2584	-1.67427	5e-05	0.000268034	306.02	330.153	302.183	310.859	37.0449	60.5652	70.3178	74.6065	-1.31041	2.01341e-28	4.20767e-26	170.205	182.941	163.664	176.279	17.6478	31.9027	32.7637	35.9718	-1.69824	8.61304e-25	1.2521e-22	GO:0004185,GO:0006508,GO:0008236,GO:0008239,GO:0016787	Lysosomal Pro X carboxypeptidase;Smp_071610	Family S28 unassigned peptidase (S28 family) [Source:UniProtKB/TrEMBL;Acc:G4VRT6]	gi|62420888|ref|NP_037511.2|	dipeptidyl peptidase 2 preproprotein [Homo sapiens]
Smp_140610	306.975	267.192	259.5	256.222	52.1525	105.752	61.7024	124.971	-1.66128	5e-05	0.000268034	421.272	429.758	382.569	408.519	32.9212	57.1381	85.4617	95.8709	-1.57369	9.25935e-14	3.50687e-12	238.51	244.949	212.907	239.227	17.1189	31.8747	42.62	48.8452	-1.93136	4.36716e-15	1.58716e-13	GO:0003993,GO:0016311,GO:0016787,GO:0046872	iron:zinc purple acid phosphatase protein;Smp_140610	Acid phosphatase-related [Source:UniProtKB/TrEMBL;Acc:C4Q6M8]	gi|228008321|ref|NP_001004318.2|	iron/zinc purple acid phosphatase-like protein precursor [Homo sapiens]
Smp_167460	2.01289	2.84151	2.15449	1.70823	0.354257	0.512698	0.623771	1.26947	-1.65908	5e-05	0.000268034	2.73059	1.72842	1.89031	1.73039	0.183473	0.440244	0.444169	0.617965	-1.37986	5.44048e-08	6.75902e-07	1.57604	1.08	1.07031	1.06227	0.104396	0.255426	0.224014	0.322095	-1.60369	1.52639e-08	1.46708e-07	GO:0005509,GO:0005886,GO:0007155,GO:0007156,GO:0016020,GO:0016021	hypothetical protein;Smp_167460	Cadherin-related [Source:UniProtKB/TrEMBL;Acc:G4LXK0]	gi|165932370|ref|NP_078858.4|	protocadherin Fat 4 precursor [Homo sapiens]
Smp_152020	52.5544	57.9227	52.2464	47.2494	12.3114	17.6256	14.8834	21.8108	-1.65593	5e-05	0.000268034	67.1998	59.7555	60.4168	60.1764	6.87089	13.0726	12.866	15.7495	-1.34673	2.67526e-40	1.64782e-37	38.875	34.8158	34.275	35.8794	3.56126	7.29778	6.53749	8.14575	-1.7034	8.00523e-24	1.12559e-21	GO:0016020,GO:0016021,GO:0016246,GO:0033227,GO:0051033	SID1 transmembrane family;Smp_152020	Putative uncharacterized protein [Source:UniProtKB/TrEMBL;Acc:G4VB89]	gi|94721340|ref|NP_001035545.1|	SID1 transmembrane family member 2 precursor [Homo sapiens]
Smp_042910	279.658	229.343	237.559	209.594	66.7032	74.7039	65.1596	98.1501	-1.64977	5e-05	0.000268034	200.128	230.436	199.498	193.334	25.3127	40.6952	37.6034	50.7302	-1.36802	4.33775e-62	1.01529e-58	115.246	134.734	113.523	115.35	13.5994	23.2053	19.4828	26.6593	-1.74026	7.7269e-28	1.50622e-25	GO:0016020,GO:0016021	hypothetical protein;Smp_042910	Putative uncharacterized protein [Source:UniProtKB/TrEMBL;Acc:G4LX15]	_	_
Smp_040510	40.072	35.4458	34.0858	29.5816	9.36774	11.6908	11.8256	11.5708	-1.64659	5e-05	0.000268034	32.8877	34.7264	30.367	29.0458	3.49972	7.23964	6.22023	6.2456	-1.36177	1.19129e-41	8.71351e-39	18.5856	19.804	16.826	17.0255	1.80035	4.01535	3.10336	3.10714	-1.80356	1.82558e-35	7.45618e-33	GO:0006487,GO:0016740,GO:0016757,GO:0030144	alpha 1%2C6 mannosylglycoprotein;Smp_040510	Putative alpha-mannoside beta-1,6-n-acetylglucosaminyltransferase [Source:UniProtKB/TrEMBL;Acc:G4VB58]	gi|4505167|ref|NP_002401.1|	alpha-1,6-mannosylglycoprotein 6-beta-N-acetylglucosaminyltransferase A [Homo sapiens]
SmVG_008690	8.73954	14.6859	9.22773	7.23023	1.27988	4.62156	3.43535	3.44132	-1.64211	5e-05	0.000268034	45.8174	21.5117	34.3202	24.4851	4.0408	7.37399	10.1697	11.0326	-1.08252	8.99832e-05	0.000513444	28.9085	13.3277	20.2431	16.6511	2.49896	4.77235	5.23074	5.97019	-1.23129	2.62587e-05	0.00011453	GO:0006812,GO:0016021,GO:0016887
Smp_135380	3.78733	4.81821	4.11409	3.61807	1.03407	1.41837	1.03021	1.75649	-1.6408	5e-05	0.000268034	3.93045	2.90537	3.30952	3.36763	0.474676	0.692708	0.881273	0.886063	-1.18111	4.50659e-11	1.05271e-09	2.28041	1.69892	1.89948	1.98551	0.235133	0.369371	0.438122	0.462141	-1.55851	3.14554e-13	8.2004e-12	GO:0000981,GO:0003676,GO:0003700,GO:0005622,GO:0005634,GO:0006351,GO:0006357,GO:0008270,GO:0040034,GO:0046872	hunchback;Smp_135380	Putative hunchback protein [Source:UniProtKB/TrEMBL;Acc:G4VQG9]	gi|210031219|ref|NP_612383.1|	zinc finger protein 845 [Homo sapiens]
Smp_136620	38.4899	42.2648	35.0902	32.8109	13.6135	10.3538	8.01888	15.7104	-1.64002	5e-05	0.000268034	26.4832	23.9217	22.965	21.913	4.81446	4.13514	4.7745	5.66242	-1.16013	1.97327e-05	0.000133409	15.2939	14.2377	13.1443	13.2167	2.40528	2.33876	2.40496	3.11034	-1.52895	1.23195e-08	1.22438e-07		hypothetical protein;Smp_136620	Putative uncharacterized protein [Source:UniProtKB/TrEMBL;Acc:C4Q4G9]	_	_
Smp_150730	9.10615	11.0248	10.2144	8.13848	2.75919	3.19572	2.4521	3.96798	-1.63682	5e-05	0.000268034	9.35388	7.56251	8.51858	7.39608	0.958437	1.48455	1.67508	2.0589	-1.40783	1.00804e-34	3.33742e-32	5.43807	4.4389	4.85087	4.44549	0.526952	0.84611	0.859764	1.04	-1.74475	1.81453e-23	2.32287e-21	GO:0004714,GO:0007155,GO:0016020,GO:0016021,GO:0016740,GO:0018108,GO:0070492	discoidin domain containing receptor 2;Smp_150730	Putative discoidin domain receptor [Source:UniProtKB/TrEMBL;Acc:G4V7C2]	gi|62420884|ref|NP_006173.2|	discoidin domain-containing receptor 2 precursor [Homo sapiens]
Smp_200240	82.1941	91.8084	69.8175	69.8345	16.3312	21.3162	24.1953	39.0817	-1.6359	5e-05	0.000268034	90.707	79.0618	69.5571	74.6271	11.9124	19.275	15.7316	23.4627	-1.17581	1.38279e-27	2.65291e-25	55.0748	48.4955	41.7921	46.8435	6.8612	11.6869	8.78044	13.1173	-1.45674	2.08164e-19	1.43986e-17	GO:0006950	universal stress protein;note=iprscan%3BInterPro:IPR006016 : UspA%3BPfam:PF00582%3B%3Bscore%3D1.8E-10%3Bquery 16-164%3Bdescription%3DUspA;note=iprscan%3BInterPro:IPR006015 : Universal stress protein (Usp)%3BPRINTS:PR01438%3B%3Bscore%3D1.5E-15%3Bquery 124-136%3Bdescription%3DUniversal stress protein A;note=iprscan%3BInterPro:IPR006015 : Universal stress protein (Usp)%3BPRINTS:PR01438%3B%3Bscore%3D…	Putative uncharacterized protein Smp_200240 [Source:UniProtKB/TrEMBL;Acc:G4V5S1]	_	_
Smp_160740	41.4146	48.5954	52.6037	45.2562	11.8782	13.9557	16.7521	17.9826	-1.63309	5e-05	0.000268034	53.9582	47.571	59.3539	60.8042	6.30296	13.9681	12.6434	13.5957	-1.19519	6.15346e-18	4.18686e-16	31.7799	27.9249	33.8903	36.8141	3.36339	7.88416	6.44143	7.0266	-1.61444	3.59572e-25	5.50724e-23	GO:0016020,GO:0016021	choline transporter protein 2;Smp_160740
Smp_056990	41.9515	54.4239	42.3383	40.7263	15.5281	10.2327	9.46027	22.6753	-1.63196	5e-05	0.000268034	64.9149	51.7355	55.525	56.79	7.43466	9.63682	7.38864	16.6827	-1.50761	2.63786e-48	2.37469e-45	39.0425	31.4971	33.0692	35.4399	4.31408	5.78777	4.0349	9.18923	-1.78655	1.03127e-15	4.11407e-14	GO:0004970,GO:0005234,GO:0016020,GO:0016021,GO:0035235	thyroid receptor interacting protein 11;Smp_056990	Putative uncharacterized protein [Source:UniProtKB/TrEMBL;Acc:G4V5I7]	_	_
Smp_158520	57.1749	52.6142	50.6021	57.1715	17.5879	14.8896	17.0072	20.7128	-1.63194	5e-05	0.000268034	42.4403	44.3082	40.193	50.5524	6.15224	9.75243	7.34243	10.1562	-1.26326	1.03515e-29	2.32967e-27	24.3752	25.6136	22.5763	29.8136	3.19627	5.40718	3.68939	5.09876	-1.71602	3.65309e-38	2.08884e-35	GO:0004144,GO:0016740,GO:0016746,GO:0016747	diacylglycerol O acyltransferase;Smp_158520	Putative diacylglycerol O-acyltransferase [Source:UniProtKB/TrEMBL;Acc:G4V6S2]	gi|38348340|ref|NP_940914.1|	diacylglycerol O-acyltransferase 2-like protein 6 [Homo sapiens]
Smp_145130	3.31465	5.59594	3.30898	2.32141	0.925529	0.904661	1.14106	1.72731	-1.62983	5e-05	0.000268034	4.72189	2.88233	3.01499	2.14323	0.496764	0.844854	0.782522	1.08002	-1.16553	3.51749e-10	6.97716e-09	2.90949	1.78098	1.83262	1.44392	0.312816	0.667997	0.5272	0.598094	-1.11142	1.99051e-05	9.0093e-05		rassf;Smp_145130	Rassf, putative [Source:UniProtKB/TrEMBL;Acc:G4M0R2]	_	_
Smp_152910	27.6257	24.7345	38.1203	39.4601	7.04053	14.8208	8.36544	11.7621	-1.62977	5e-05	0.000268034	25.9908	27.914	38.8721	43.7466	3.87617	6.74349	10.3191	7.65932	-1.11444	1.01382e-05	7.42007e-05	14.3971	15.6343	21.1701	25.1438	1.92571	3.62242	5.00615	3.76649	-1.59327	2.52607e-11	4.37699e-10		hypothetical protein;Smp_152910	Putative uncharacterized protein [Source:UniProtKB/TrEMBL;Acc:G4VMW8]	gi|299473771|ref|NP_001177396.1|	hypothetical protein LOC80164 [Homo sapiens]
Smp_130050	4.40673	4.36351	2.83858	2.64362	1.6816	1.38372	1.04647	0.503396	-1.62675	0.00015	0.000719901	4.81898	4.42166	3.31056	3.7837	0.685268	0.896409	0.79966	0.426747	-1.17796	5.19754e-05	0.000315655	2.8409	2.62254	1.94485	2.32307	0.367623	0.616125	0.408695	0.222725	-1.75329	1.76072e-09	2.09746e-08	GO:0004842,GO:0005515,GO:0008270,GO:0016567,GO:0046872	PDZ domain containing RING finger protein;Smp_130050	Putative uncharacterized protein [Source:UniProtKB/TrEMBL;Acc:G4LXM7]	_	_
Smp_129530	2.09025	3.91668	2.57079	2.46094	0.807866	0.610934	0.88481	1.28158	-1.62244	5e-05	0.000268034	4.24429	2.29658	2.86688	2.74461	0.570332	0.734575	0.52619	1.0134	-1.16223	1.58577e-07	1.7442e-06	2.65481	1.46179	1.72579	1.74667	0.332275	0.449118	0.285971	0.625033	-1.35953	1.66118e-06	9.8194e-06	GO:0005509,GO:0005886,GO:0007155,GO:0007156,GO:0016020,GO:0016021	protocadherin gamma A5;Smp_129530	Putative cadherin [Source:UniProtKB/TrEMBL;Acc:G4VEK8]	gi|11056024|ref|NP_061741.1|	protocadherin gamma-A5 isoform 1 precursor [Homo sapiens]
Smp_135290	2.51752	2.8667	2.85795	2.50241	0.510079	1.01002	0.848486	1.12132	-1.62235	5e-05	0.000268034	3.10686	2.68054	3.04983	3.01783	0.304394	0.760655	0.696125	0.702404	-1.24412	1.40294e-11	3.60118e-10	1.81621	1.53623	1.68263	1.75106	0.152119	0.435296	0.344633	0.360034	-1.61093	6.14114e-15	2.1499e-13	GO:0016020,GO:0016021	macrophage expressed gene 1 protein;note=predicted by EVM2;note=pfam_scan%3BPfam:PF01823.14%3B%3BE()%3D3.3E-19%3Bscore%3D69.3%3Bqu ery 447-636%3Bdescription%3DMACPF;note=iprscan%3BInterPro:IPR001862 : Membrane attack complex component/perforin/complement C9%3BPfam:PF01823%3B%3Bscore%3D9.0E-23%3Bquery 491-636%3Bdescription%3DMembrane attack complex component/perforin/complement C9;note=tmhmm%3B%3B…	Putative uncharacterized protein [Source:UniProtKB/TrEMBL;Acc:G4VQ78]	gi|133505169|ref|NP_001034485.1|	macrophage expressed gene 1 precursor [Homo sapiens]
Smp_131470	11.5182	9.15882	7.87824	8.66948	0.80932	3.89277	2.70966	4.72032	-1.61743	5e-05	0.000268034	9.48364	11.7534	8.29588	10.21	0.389098	1.93992	2.97973	3.0248	-1.55716	0.00263411	0.00938416	7.08458	8.41927	5.97837	7.78182	0.267388	1.24723	1.66553	1.9156	-1.7283	4.45294e-06	2.36342e-05	GO:0016020,GO:0016021	hypothetical protein;Smp_131470	Putative uncharacterized protein [Source:UniProtKB/TrEMBL;Acc:G4VTK0]	_	_
Smp_128220	7.1012	6.5793	6.43355	6.02809	1.59212	3.13527	1.59365	2.20429	-1.61655	5e-05	0.000268034	8.64068	8.4065	8.64719	8.63028	0.971559	1.50469	2.50915	1.71177	-1.27058	1.35641e-08	1.90793e-07	4.99711	4.89484	4.91951	5.1626	0.500939	0.841456	1.25578	0.882914	-1.7043	8.37481e-15	2.82798e-13	GO:0005515,GO:0016020,GO:0016021	neurogenic locus notch;Smp_128220	Putative pro-neuregulin-4, membrane-bound isoform (Pro-NRG4) [Source:UniProtKB/TrEMBL;Acc:G4VD78]	gi|134244285|ref|NP_000426.2|	neurogenic locus notch homolog protein 3 precursor [Homo sapiens]
SmVG_030892	13.9681	16.7871	12.8447	14.1114	6.46917	3.99977	3.38709	4.98038	-1.61533	5e-05	0.000268034	12.7767	10.2871	9.60045	11.2741	2.2764	1.86659	1.94389	2.26647	-1.22312	4.14744e-09	6.49765e-08	8.40661	6.64624	6.02957	7.37874	1.32547	1.14659	1.12545	1.37047	-1.6793	6.29412e-15	2.1945e-13
Smp_205270	9.69041	7.58356	7.1138	6.64515	2.55594	2.78282	2.37656	2.50223	-1.60275	0.0001	0.000501375	20.1027	23.5494	16.6157	16.6934	3.90783	5.33954	5.08431	5.70488	-0.961743	3.71474e-08	4.82504e-07	11.5654	13.7486	9.55823	10.0391	2.05132	2.98106	2.57604	2.93204	-1.24092	8.4005e-09	8.70182e-08	GO:0005515,GO:0008270,GO:0046872	ring finger protein 11 (sid 1669) (nedd4 ww;note=iprscan%3BSuperfamily:SSF57850%3B%3Bscore%3D2.5E-11%3Bquery 6-73%3Bdescription%3Dnull;note=iprscan%3BInterPro:IPR018957 : Zinc finger%2C C3HC4 RING-type%3BPfam:PF00097%3B%3Bscore%3D4.5E-7%3Bquery 29-69%3Bdescription%3DZinc finger%2C C3HC4 RING-type;Smp_205270
Smp_175330	9.02852	8.49903	10.5113	12.3424	2.72537	3.28868	3.26238	4.05536	-1.59881	5e-05	0.000268034	9.18299	9.17957	10.1806	13.0097	1.06539	2.19618	1.92541	2.86761	-1.30067	4.72838e-14	1.90159e-12	5.49258	5.45113	5.81238	7.88767	0.574543	1.32386	1.02171	1.48208	-1.64815	1.24793e-14	4.10096e-13		hypothetical protein;Smp_175330.2	Putative uncharacterized protein [Source:UniProtKB/TrEMBL;Acc:G4LZP9]	gi|24797145|ref|NP_722523.1|	sorting nexin-14 isoform a [Homo sapiens]
Smp_197760	8.18934	12.1674	8.86366	7.95976	2.71104	2.54961	3.04325	3.99135	-1.59643	5e-05	0.000268034	10.0862	6.64478	7.22262	8.03958	1.06489	1.90195	1.31281	1.84101	-1.27607	5.61051e-10	1.06246e-08	6.12207	4.14474	4.34597	5.11013	0.608538	1.17498	0.808129	1.06748	-1.66037	1.40701e-14	4.55392e-13	GO:0005049,GO:0005488,GO:0005643,GO:0005737,GO:0006611,GO:0008536	exportin 7;Smp_197760	DNA polymerase I, putative [Source:UniProtKB/TrEMBL;Acc:G4LWD2]	gi|154448892|ref|NP_055839.3|	exportin-7 [Homo sapiens]
Smp_070940	108.013	136.561	99.5769	102.174	29.8188	32.2603	35.5744	50.4965	-1.59103	5e-05	0.000268034	101.336	76.6782	75.256	79.3222	10.4513	19.5022	15.8435	22.0103	-1.23771	1.8788e-13	6.7654e-12	67.5791	49.5488	48.5999	55.303	6.5711	12.4382	8.04699	12.6883	-1.48875	1.04287e-14	3.45354e-13		hypothetical protein;Smp_070940
SmVG_000886	6.92078	5.7181	7.6391	6.02231	1.06407	2.00035	2.56152	3.10617	-1.59068	5e-05	0.000268034	3.37946	3.10889	4.03054	3.19805	0.214912	0.561887	0.419513	1.11614	-1.68651	0.000957431	0.00397898	2.8167	2.98251	3.28683	2.87656	0.181338	0.792565	0.458578	0.863531	-1.54492	5.81826e-07	3.83576e-06
Smp_051500	25.9448	23.863	24.2565	19.7149	8.95731	6.45113	7.96807	7.81679	-1.58803	5e-05	0.000268034	14.0601	14.8713	16.3567	14.0625	3.3393	5.75815	3.79193	4.22054	-0.834574	3.66232e-09	5.79191e-08	13.9788	14.3073	14.8907	14.8579	2.60414	4.55895	3.45733	3.55411	-1.22488	1.63343e-21	1.47473e-19		nucleolar protein c7c;Smp_051500	Nucleolar protein c7c, putative [Source:UniProtKB/TrEMBL;Acc:C4QB32]	_	_
SmVG_024352	4.53063	4.10574	3.68815	3.39197	0.41586	2.85561	0.535179	1.4326	-1.58485	5e-05	0.000268034	1.99598	3.08862	1.74802	1.99422	0.156596	0.406827	0.798237	0.32331	-1.32424	0.00166329	0.00636543	2.35838	2.97641	2.21991	2.53459	0.120178	0.412279	0.894044	0.56359	-1.56384	4.07976e-05	0.000169126
Smp_134750	4.88546	4.43033	3.52994	5.2285	0.900231	1.71707	1.22453	2.18483	-1.5845	5e-05	0.000268034	4.3284	4.63596	3.41296	5.59587	0.47096	1.13701	1.11406	1.35004	-1.13997	3.64148e-09	5.76674e-08	2.58819	2.77575	2.01	3.44849	0.243781	0.674026	0.603432	0.733268	-1.47992	1.31828e-09	1.6199e-08		hypothetical protein;Smp_134750	Putative uncharacterized protein [Source:UniProtKB/TrEMBL;Acc:G4VFX5]	_	_
Smp_162770	696.699	654.21	633.377	551.997	104.722	235.151	164.831	343.858	-1.57962	5e-05	0.000268034	687.096	676.672	633.383	599.484	49.2269	114.69	144.153	205.966	-1.51737	2.42932e-11	5.94777e-10	404.734	402.28	366.658	364.425	26.8833	66.2788	75.7961	109.481	-1.69016	1.22108e-08	1.21712e-07	GO:0016020,GO:0016021	lysosome associated membrane glycoprotein;note=tmhmm%3B%3Bquery 1-349%3B;Smp_162770	Putative uncharacterized protein [Source:UniProtKB/TrEMBL;Acc:G4VS56]	_	_
Smp_198700	6.66359	11.3364	9.05639	6.03924	2.24332	3.45413	1.961	3.43062	-1.5775	5e-05	0.000268034	12.4845	6.94136	9.45536	6.74091	1.27369	1.80559	2.41915	2.06364	-1.21325	7.65769e-09	1.14018e-07	7.12399	3.96015	5.29365	3.98593	0.665193	1.01828	1.20573	1.04292	-1.548	4.35934e-09	4.73292e-08	GO:0005524,GO:0016301,GO:0016310,GO:0016772	mitogen activated protein kinase kinase kinase;Smp_198700
Smp_125250	96.0516	89.0948	83.8229	82.1229	13.0062	33.4969	22.5595	48.9058	-1.57345	5e-05	0.000268034	79.3172	80.8912	71.4058	77.3367	5.69663	15.0761	18.6654	26.0797	-1.43709	4.04535e-08	5.18541e-07	45.9688	47.4671	41.1698	46.5815	2.98649	8.73618	9.79228	13.7639	-1.57696	1.27555e-07	9.87398e-07	GO:0016020,GO:0016021	hypothetical protein;note=tmhmm%3B%3Bquery 1-130%3B;note=%3Bquery 28-130%3B;note=%3Bquery 5-27%3B;note=%3Bquery 1-4%3B;Smp_125250	Putative uncharacterized protein [Source:UniProtKB/TrEMBL;Acc:G4V736]	_	_
Smp_143300	1.94731	2.74169	2.2277	1.73353	0.724899	0.258918	0.587115	1.33816	-1.57217	5e-05	0.000268034	2.59902	1.90395	2.32362	1.86454	0.341606	0.402417	0.199262	0.796401	-1.55866	4.25134e-10	8.29223e-09	1.49175	1.10373	1.3162	1.1046	0.180472	0.226735	0.114707	0.400409	-1.62759	1.387e-07	1.06694e-06	GO:0005509,GO:0005515	fibrillin 1;Smp_143300	Notch [Source:UniProtKB/TrEMBL;Acc:G4LUK9]	gi|281485550|ref|NP_000129.3|	fibrillin-1 precursor [Homo sapiens]
Smp_132800	2.18547	3.1741	2.59724	3.12466	0.717069	1.23517	1.0751	0.702461	-1.57098	0.0002	0.000928806	4.40875	3.05473	3.66791	5.01498	0.916031	0.983176	0.822412	0.511978	-0.926033	0.000725123	0.00313141	2.46268	1.62486	2.05324	2.91219	0.45516	0.531846	0.396573	0.248639	-1.60638	6.8614e-08	5.65324e-07	GO:0046983	STARP antigen;Smp_132800
Smp_153480	86.8543	91.5967	85.7359	63.1953	16.9958	26.79	25.5498	41.3273	-1.5648	5e-05	0.000268034	83.1983	74.0292	74.8101	60.6051	6.77709	15.6041	14.6547	20.6142	-1.46131	4.59779e-23	6.04584e-21	47.839	42.7915	42.3517	35.9429	3.50475	8.73169	7.38044	10.5561	-1.71032	9.09445e-14	2.6001e-12	GO:0005215,GO:0006810,GO:0006811,GO:0006821,GO:0015379,GO:0016020,GO:0016021,GO:0022820,GO:0055085,GO:0071805,GO:1902476	solute carrier family 12;Smp_153480	Putative cation chloride cotransporter [Source:UniProtKB/TrEMBL;Acc:G4VNM7]	gi|31881740|ref|NP_064631.2|	solute carrier family 12 member 9 [Homo sapiens]
Smp_196840	26.6356	36.3563	44.0456	34.4016	11.2795	10.6029	9.1675	16.9294	-1.55969	5e-05	0.000268034	46.0495	30.161	51.6687	42.215	6.77584	8.21364	8.02829	12.88	-1.2569	1.03553e-12	3.22309e-11	23.1765	15.5676	25.3081	22.3448	3.03639	4.01163	3.46727	5.46284	-1.56966	3.88266e-14	1.16033e-12	GO:0005201,GO:0005578,GO:0005581	collagen alpha 1(II) chain;Smp_196840	Putative uncharacterized protein [Source:UniProtKB/TrEMBL;Acc:G4V6S8]	gi|89363017|ref|NP_000384.2|	collagen alpha-2(V) chain preproprotein [Homo sapiens]
Smp_150740	20.6315	20.9011	21.4148	26.8293	5.18877	6.24553	7.89456	11.4102	-1.54627	5e-05	0.000268034	18.8478	17.9859	18.7111	26.6232	2.07317	5.05175	3.55009	5.95853	-1.27933	3.08716e-25	4.94918e-23	11.108	10.6537	10.9178	16.1595	1.14751	2.95485	1.92169	3.17452	-1.62803	1.37957e-14	4.49908e-13		asparagine rich antigen;Smp_150740	Putative asparagine-rich antigen [Source:UniProtKB/TrEMBL;Acc:G4V7C1]	_	_
Smp_123860	4.10187	5.95966	4.27944	3.36891	1.89273	0.571066	0.702134	2.91729	-1.54165	5e-05	0.000268034	4.95589	3.27038	3.49492	3.21896	0.761865	0.483462	0.387514	1.31594	-1.54131	3.30063e-06	2.72023e-05	2.97474	1.97721	2.07107	1.9914	0.430476	0.29569	0.205825	0.70871	-1.61237	4.00776e-06	2.14707e-05	GO:0005515,GO:0007268,GO:0007269,GO:0007416,GO:0016020,GO:0016021,GO:0051965,GO:0090129	neurexin 2 alpha;Smp_123860	Putative neurexin [Source:UniProtKB/TrEMBL;Acc:G4V6X2]	gi|21070969|ref|NP_004787.2|	neurexin-3-beta isoform 1 precursor [Homo sapiens]
Smp_042140	161.937	160.161	148.654	136.045	42.7497	38.5414	50.2552	76.8978	-1.54156	5e-05	0.000268034	182.33	174.144	163.336	171.578	24.8974	46.0453	30.5458	55.6281	-1.21074	8.72873e-49	8.51269e-46	106.115	102.506	93.5174	103.209	13.4517	26.4336	15.823	29.02	-1.45689	1.61217e-16	7.23957e-15	GO:0005509,GO:0005875,GO:0007017,GO:0030286	tegument-allergen-like protein;Smp_042140	Putative dynein light chain [Source:UniProtKB/TrEMBL;Acc:G4VJT7]	_	_
Smp_147460	54.9629	63.1316	54.6514	46.5392	14.4652	17.2994	16.829	26.7698	-1.54087	5e-05	0.000268034	68.1543	57.4232	59.1027	54.2666	6.6085	12.6314	11.2698	16.718	-1.38805	1.042e-49	1.1086e-46	38.8359	33.116	33.1725	32.2451	3.49194	7.16064	5.70417	8.58833	-1.68191	6.08212e-19	3.83576e-17	GO:0016787,GO:0017040	ceramidase;Smp_147460	Ceramidase [Source:UniProtKB/TrEMBL;Acc:G4VN86]	gi|221218981|ref|NP_063946.2|	neutral ceramidase isoform a [Homo sapiens]
Smp_123010	36.8111	40.5374	43.05	41.6134	12.0507	13.8394	13.5191	16.4377	-1.53655	5e-05	0.000268034	42.4568	37.6279	45.2009	47.5513	6.72185	11.2565	10.252	10.8808	-1.07501	1.82867e-39	1.07005e-36	23.913	21.3876	24.8707	27.7485	3.4215	6.16159	5.04761	5.41285	-1.48106	9.45792e-38	4.7718e-35	GO:0000064,GO:0003333,GO:0005887,GO:0015171,GO:0015181,GO:0015189,GO:0015297,GO:0016020,GO:0016021,GO:1903352,GO:1903401,GO:1903826	high affinity cationic amino acid transporter 1;Smp_123010	Putative cationic amino acid transporter [Source:UniProtKB/TrEMBL;Acc:G4VCH8]	gi|4507047|ref|NP_003036.1|	high affinity cationic amino acid transporter 1 [Homo sapiens]
SmVG_024757:Smp_174340	3.9408	5.81003	4.48988	3.11427	2.11843	0.714492	1.50991	1.66887	-1.52951	5e-05	0.000268034	5.46034	3.73055	4.3189	3.42124	0.915859	1.04075	0.439935	0.904958	-1.33504	2.01731e-05	0.00013623	3.12066	2.13671	2.42229	2.01037	0.476646	0.577058	0.219281	0.454445	-1.66713	7.91597e-10	1.00735e-08		frizzled 9;note=predicted by EVM2;Smp_174340	Putative uncharacterized protein [Source:UniProtKB/TrEMBL;Acc:G4VRM2]	_	_
SmVG_024757:Smp_174350	3.9408	5.81003	4.48988	3.11427	2.11843	0.714492	1.50991	1.66887	-1.52951	5e-05	0.000268034	5.46034	3.73055	4.3189	3.42124	0.915859	1.04075	0.439935	0.904958	-1.33504	2.01731e-05	0.00013623	3.12066	2.13671	2.42229	2.01037	0.476646	0.577058	0.219281	0.454445	-1.66713	7.91597e-10	1.00735e-08		frizzled 4;Smp_174350
SmVG_012648:Smp_023570	19.3133	22.7408	16.6593	15.2384	4.96008	4.64391	7.1923	9.03036	-1.51772	5e-05	0.000268034	20.485	16.6795	14.5217	14.6099	1.94323	4.40036	2.44929	4.57919	-1.38134	1.08622e-18	7.79882e-17	11.8379	9.65743	8.19261	8.68142	1.02465	2.46956	1.24666	2.34504	-1.66249	4.40993e-15	1.59595e-13		ATP binding cassette sub family B;Smp_023570	Putative atp-binding cassette, sub-family B,member 6,mitochondrial (Abc6) [Source:UniProtKB/TrEMBL;Acc:G4VFT0]	gi|9955963|ref|NP_005680.1|	ATP-binding cassette sub-family B member 6, mitochondrial [Homo sapiens]
SmVG_012648:Smp_116630	19.3133	22.7408	16.6593	15.2384	4.96008	4.64391	7.1923	9.03036	-1.51772	5e-05	0.000268034	20.485	16.6795	14.5217	14.6099	1.94323	4.40036	2.44929	4.57919	-1.38134	1.08622e-18	7.79882e-17	11.8379	9.65743	8.19261	8.68142	1.02465	2.46956	1.24666	2.34504	-1.66249	4.40993e-15	1.59595e-13		ATP binding cassette sub family B;Smp_116630	Putative atp-binding cassette, sub-family B,member 6,mitochondrial (Abc6) [Source:UniProtKB/TrEMBL;Acc:G4VFS9]	_	_
SmVG_012648:Smp_134890	19.3133	22.7408	16.6593	15.2384	4.96008	4.64391	7.1923	9.03036	-1.51772	5e-05	0.000268034	20.485	16.6795	14.5217	14.6099	1.94323	4.40036	2.44929	4.57919	-1.38134	1.08622e-18	7.79882e-17	11.8379	9.65743	8.19261	8.68142	1.02465	2.46956	1.24666	2.34504	-1.66249	4.40993e-15	1.59595e-13		ATP binding cassette sub family B;Smp_134890	Putative atp-binding cassette, sub-family B,member 6,mitochondrial (Abc6) [Source:UniProtKB/TrEMBL;Acc:G4VFS8]	gi|42490749|ref|NP_004290.2|	ATP-binding cassette sub-family B member 7, mitochondrial [Homo sapiens]
Smp_199210	11.871	22.5373	20.9525	11.9432	5.45251	5.4375	4.98056	7.66137	-1.51607	5e-05	0.000268034	29.1895	14.8418	26.815	16.5865	3.25217	4.96038	4.96916	5.96931	-1.21779	7.043e-09	1.05851e-07	16.764	8.61119	15.1523	9.86419	1.72228	2.84269	2.62059	3.10221	-1.52639	8.64004e-11	1.34007e-09	GO:0000166,GO:0005388,GO:0005524,GO:0005887,GO:0006810,GO:0006811,GO:0006812,GO:0006816,GO:0016020,GO:0016021,GO:0016787,GO:0019829,GO:0030165,GO:0043231,GO:0046872,GO:0051480,GO:0070588	plasma membrane calcium transporting ATPase;Smp_199210	Plasma membrane calcium-transporting atpase,putative [Source:UniProtKB/TrEMBL;Acc:G4M1H5]	gi|48255951|ref|NP_001001331.1|	plasma membrane calcium-transporting ATPase 2 isoform 1 [Homo sapiens]
Smp_188700	35.9998	49.5128	49.9491	39.2523	15.2819	17.0995	15.9371	12.939	-1.51204	0.0005	0.00207048	55.9336	37.4514	50.6728	44.5895	8.42379	12.7015	10.9769	9.1405	-1.02496	3.47236e-12	9.76851e-11	33.0524	22.4705	29.6944	27.0048	4.64397	7.54544	6.08611	5.0487	-1.44932	7.92604e-16	3.25271e-14	GO:0003743,GO:0006413	eukaryotic translation initiation;Smp_188700	Putative eukaryotic translation initiation factor 3 subunit (Eif-3) [Source:UniProtKB/TrEMBL;Acc:G4VA35]	gi|87162455|ref|NP_056044.3|	hypothetical protein LOC23277 [Homo sapiens]
Smp_163380	11.0611	9.70939	10.5957	8.84152	2.57204	3.48876	3.77324	4.37671	-1.50049	5e-05	0.000268034	9.89242	10.2147	9.56403	9.34968	1.06485	2.50644	2.27053	2.61791	-1.24748	1.52497e-17	9.97022e-16	5.99969	6.2299	5.81472	6.07479	0.560034	1.47772	1.1677	1.39072	-1.58068	1.1788e-16	5.32137e-15	GO:0000166,GO:0004672,GO:0004674,GO:0005524,GO:0006468,GO:0016301,GO:0016310,GO:0016772	cyclin dependent kinase 2;Smp_163380	Serine/threonine kinase [Source:UniProtKB/TrEMBL;Acc:G4LZG2]	gi|4505569|ref|NP_003939.1|	cyclin-dependent kinase-like 2 [Homo sapiens]
Smp_121950	62.7459	87.6669	71.1157	58.6736	23.9832	16.9933	21.716	36.4283	-1.49921	5e-05	0.000268034	88.1871	56.9602	67.7664	59.0547	9.73671	13.9034	9.93459	19.5793	-1.40283	6.65962e-24	9.62192e-22	52.4723	33.9717	39.5685	35.9694	5.21831	8.04229	5.24152	10.3228	-1.69298	1.57016e-15	6.03913e-14		hypothetical protein;note=trans_spliced (SO:0000870);note=predicted by EVM2;Smp_121950	Putative uncharacterized protein [Source:UniProtKB/TrEMBL;Acc:G4VAU6]	_	_
Smp_210000	8.46774	10.9035	11.1796	7.94178	3.2198	3.03802	3.13571	4.24094	-1.49732	5e-05	0.000268034	8.41412	6.02683	8.89125	8.00912	0.952983	1.29221	1.65339	1.65002	-1.30848	2.14891e-06	1.85325e-05	7.85299	5.08392	7.5271	6.90866	0.638103	1.36684	1.2562	1.65686	-1.65379	1.73345e-10	2.50721e-09	GO:0016020,GO:0016021	sterol response element binding protein;Smp_210000
Smp_053900	494.146	446.545	412.587	431.341	116.793	172.064	141.769	205.898	-1.48733	5e-05	0.000268034	594.388	654.943	551.417	637.536	94.0332	146.801	167.959	177.137	-1.06121	1.38798e-20	1.22132e-18	342.914	381.735	312.563	380.893	50.1013	83.6222	86.2748	91.1584	-1.38108	2.15037e-18	1.2462e-16	GO:0003824,GO:0004553,GO:0004563,GO:0005975,GO:0008152,GO:0016787,GO:0016798	beta hexosaminidase subunit beta;Smp_053900	Putative beta-hexosaminidase B [Source:UniProtKB/TrEMBL;Acc:G4VHP9]	gi|4504373|ref|NP_000512.1|	beta-hexosaminidase subunit beta preproprotein [Homo sapiens]
Smp_086470	26.2529	26.7043	26.6002	20.0322	4.99613	9.90876	6.76238	13.9242	-1.48446	5e-05	0.000268034	37.6846	36.4008	35.0913	31.8038	4.08168	8.87976	9.67918	13.6399	-1.20178	5.29012e-13	1.72452e-11	22.2027	21.5176	20.1582	19.2367	2.16935	4.9593	4.91693	7.06827	-1.32258	3.40041e-08	3.01295e-07	GO:0005509,GO:0005875,GO:0007017,GO:0030286	tegument-allergen-like protein;Smp_086470	Putative 22.6kDa tegument-associated antigen [Source:UniProtKB/TrEMBL;Acc:G4VA23]	_	_
SmVG_025004	1.75367	4.34688	3.0864	2.50273	0.579848	1.38927	0.629936	1.59201	-1.47985	0.0033	0.0104857	5.33356	2.0636	3.95003	3.04351	0.210676	0.642728	1.23343	1.20373	-1.3237	0.00525204	0.0168674	3.09004	1.15462	2.17852	1.79258	0.0938339	0.328011	0.547766	0.556948	-1.4728	0.000631439	0.00188574
Smp_081430	17.5328	32.3108	22.6482	14.1825	8.6378	6.16284	6.35022	10.123	-1.47065	5e-05	0.000268034	29.1751	15.7469	20.636	14.051	4.75493	4.75184	3.97084	5.64493	-1.11359	1.07009e-06	9.83759e-06	17.1854	9.33769	11.9264	8.46461	2.52179	2.74343	2.07786	2.91554	-1.36623	1.45088e-08	1.40772e-07	GO:0000166,GO:0008152,GO:0016491,GO:0055114	retinol dehydrogenase 11;Smp_081430	Short chain dehydrogenase,putative [Source:UniProtKB/TrEMBL;Acc:G4LV77]	gi|225579078|ref|NP_001139443.1|	retinol dehydrogenase 13 isoform 1 [Homo sapiens]
Smp_193350	3.67903	4.3012	3.86667	3.58684	1.11817	1.54432	0.91886	1.99561	-1.46854	5e-05	0.000268034	6.14356	4.84329	5.67578	5.03924	0.789294	0.891004	1.44184	1.92616	-1.24493	7.33401e-09	1.09897e-07	3.85257	3.03554	3.38429	3.38449	0.413569	0.515364	0.734231	1.06046	-1.50471	3.29964e-08	2.93275e-07		cadherin EGF LAG seven pass G type receptor;Smp_193350	Putative uncharacterized protein [Source:UniProtKB/TrEMBL;Acc:G4M1W9]	_	_
Smp_176770	5.35502	6.01179	6.54898	6.22307	1.52559	2.48338	1.73391	3.00556	-1.46426	5e-05	0.000268034	5.95465	5.2422	6.32986	6.49895	0.779964	1.34423	1.62036	1.86921	-1.15107	2.87568e-15	1.38494e-13	3.48067	3.05992	3.64957	3.93347	0.424563	0.776605	0.83442	1.00174	-1.42136	1.40643e-14	4.55392e-13	GO:0005085,GO:0005622,GO:0007264,GO:0043547	dedicator of cytokinesis protein;Smp_176770	Dock-9, putative [Source:UniProtKB/TrEMBL;Acc:G4LV04]	_	_
Smp_076300	4.70248	6.36709	5.17241	4.38486	2.66942	1.26367	1.28397	2.26702	-1.46262	5e-05	0.000268034	5.15775	3.9961	4.36897	4.04273	1.00171	0.775415	0.646269	1.17181	-1.28761	2.10631e-07	2.23889e-06	3.0351	2.39137	2.52678	2.4671	0.548526	0.453485	0.338009	0.632108	-1.58034	6.16401e-11	9.91909e-10	GO:0003677,GO:0003700,GO:0003705,GO:0005634,GO:0006351,GO:0006355,GO:0006357,GO:0043565	forkhead box protein F1;Smp_076300	Forkhead protein/ forkhead protein domain,putative [Source:UniProtKB/TrEMBL;Acc:G4LZ65]	_	_
SmVG_023301	3.34973	1.98731	6.93441	8.84451	2.46713	1.2067	2.07154	1.92764	-1.46047	0.00545	0.0158661	18.6464	22.8834	24.1154	34.8146	7.45349	3.31633	5.8684	9.14736	-0.921412	0.0187888	0.04882	25.0562	28.0226	30.8122	43.3545	5.35927	5.3029	5.71333	8.65516	-1.35911	6.56174e-08	5.42197e-07
Smp_162320	1.96325	1.8666	1.97332	1.71414	0.274956	1.11095	0.481062	0.880039	-1.45236	5e-05	0.000268034	8.35479	9.37315	8.19099	8.91821	0.332481	1.06208	1.78715	1.91486	-1.87382	3.64287e-06	2.97091e-05	4.75872	5.43751	4.65596	5.21112	0.163527	0.489574	0.886006	0.945708	-2.20027	9.51432e-09	9.74962e-08	GO:0016020,GO:0016021	hypothetical protein;Smp_162320	Putative uncharacterized protein [Source:UniProtKB/TrEMBL;Acc:G4VLD0]	_	_
Smp_132610	7.98143	10.5485	8.25997	7.31329	3.84867	1.85151	2.27589	4.54113	-1.44599	5e-05	0.000268034	9.0084	5.76425	6.81749	5.5864	0.795943	0.942785	0.476129	1.85458	-1.85332	1.09411e-12	3.39638e-11	5.2783	3.5968	3.82714	3.81138	0.685066	0.831829	0.431468	1.13693	-1.60819	4.98595e-10	6.67153e-09	GO:0016020,GO:0016021	hypothetical protein;Smp_132610	Putative uncharacterized protein [Source:UniProtKB/TrEMBL;Acc:G4LUF0]	_	_
Smp_181060	11.8183	7.89638	15.8361	11.5268	1.22843	9.65255	2.16933	4.26439	-1.44304	5e-05	0.000268034	10.9259	13.5157	16.8745	14.4894	0.83141	2.20487	5.42646	3.72785	-1.39314	0.00398192	0.0133602	6.81725	8.54052	10.355	9.32021	0.462369	1.38737	3.15102	2.07498	-1.49606	0.000158367	0.000558289		hypothetical protein;note=predicted by EVM2;Smp_181060	Putative uncharacterized protein [Source:UniProtKB/TrEMBL;Acc:G4VC41]	_	_
Smp_143410	3.43484	3.9826	3.9446	2.70197	1.02109	1.11562	1.33672	1.70133	-1.44244	5e-05	0.000268034	4.64509	3.87757	4.42742	3.61379	0.654232	1.17541	0.893562	1.23317	-1.14584	4.23203e-14	1.72569e-12	2.62222	2.20479	2.4924	2.15795	0.32019	0.689931	0.444535	0.625747	-1.40223	9.257e-14	2.62905e-12	GO:0016020,GO:0016021	hypothetical protein;Smp_143410	Putative uncharacterized protein [Source:UniProtKB/TrEMBL;Acc:G4M0K2]	_	_
Smp_166960	9.74756	13.3164	11.0738	10.1135	3.33606	3.37802	3.51733	6.06976	-1.44075	5e-05	0.000268034	12.5232	9.15204	10.6235	10.857	1.66092	2.75523	2.31901	4.14823	-1.14641	1.92816e-35	7.52177e-33	7.1252	5.21253	5.89056	6.38879	0.856817	1.51005	1.13204	2.04661	-1.34179	7.39035e-12	1.45717e-10	GO:0016874	ubiquitin protein ligase BRE1;Smp_166960	Putative ubiquitin-protein ligase BRE1 [Source:UniProtKB/TrEMBL;Acc:G4VC94]	_	_
Smp_171990	10.1703	18.8923	12.1731	9.26548	1.91279	6.8698	4.86301	4.97003	-1.4398	5e-05	0.000268034	17.9202	9.89132	11.0279	10.0085	1.10148	3.36108	4.17446	2.95561	-1.13884	0.000848221	0.00358754	9.77553	5.31103	5.72724	5.58065	0.51774	1.66414	1.77115	1.32441	-1.41906	3.28105e-06	1.81091e-05		sterol regulatory element binding protein;Smp_171990	Sterol response element binding protein cleavage-activating protein, putative [Source:UniProtKB/TrEMBL;Acc:C4QLP0]	_	_
Smp_055740	12.872	15.6661	17.0925	25.5861	6.55996	8.04488	6.39422	5.3083	-1.43675	0.01475	0.0362599	24.462	16.3727	22.0357	36.1772	2.91939	4.84402	5.01821	4.50001	-1.1371	1.25052e-10	2.71518e-09	15.4596	10.436	13.6857	23.5941	1.73221	3.04586	2.89553	2.6633	-1.79856	1.07234e-13	3.01555e-12	GO:0003723,GO:0008270	nanos protein;Smp_055740	Putative nanos RNA binding domain [Source:UniProtKB/TrEMBL;Acc:G4VHK0]	gi|40804761|ref|NP_955631.1|	nanos homolog 1 [Homo sapiens]
Smp_131940	10.5854	10.981	12.5128	9.41217	3.1474	3.5831	4.0831	5.32052	-1.43062	5e-05	0.000268034	8.95824	8.30423	9.88245	8.09679	1.06627	2.44255	1.76613	2.59981	-1.25657	2.52746e-27	4.69505e-25	5.16889	4.86841	5.66227	4.86336	0.577158	1.35911	0.909739	1.34697	-1.49862	1.56092e-17	8.16342e-16	GO:0016020,GO:0016021	protein patched;Smp_131940	Putative patched 1 [Source:UniProtKB/TrEMBL;Acc:G4VNQ0]	gi|52145305|ref|NP_003729.3|	protein patched homolog 2 isoform 1 [Homo sapiens]
Smp_141680	36.1869	36.3554	38.1033	29.2568	11.9822	12.6584	10.4076	16.8881	-1.42961	5e-05	0.000268034	32.8067	30.5658	33.7041	29.2267	5.00433	6.66692	7.42922	8.93897	-1.19432	2.41226e-30	5.8814e-28	19.1708	17.9326	19.3077	17.6577	2.62641	3.76723	3.78518	4.61021	-1.49964	2.70741e-22	2.76446e-20	GO:0005578,GO:0005615,GO:0007155,GO:0030198,GO:0050839	fasciclin domain containing protein;Smp_141680	Putative uncharacterized protein [Source:UniProtKB/TrEMBL;Acc:G4V6F1]	_	_
Smp_162110	2.40305	2.77017	2.12204	2.28684	0.735078	1.20208	0.639925	0.987929	-1.42643	0.0001	0.000501375	4.50882	3.39324	4.15875	3.50657	0.409182	0.604096	1.15596	0.848188	-1.35053	5.85157e-07	5.68306e-06	2.69641	2.02162	2.40776	2.1593	0.234318	0.34151	0.601283	0.457835	-1.72474	1.08084e-10	1.64369e-09	GO:0006855,GO:0015238,GO:0015297,GO:0016020,GO:0016021,GO:0055085	multidrug and toxin extrusion protein 2;Smp_162110	Multidrug resistance pump, putative [Source:UniProtKB/TrEMBL;Acc:G4M053]	gi|38261960|ref|NP_690872.2|	multidrug and toxin extrusion protein 2 isoform 1 [Homo sapiens]
Smp_099440	3.8655	7.06868	5.07671	4.05683	2.33231	1.08676	1.27222	2.7858	-1.42433	5e-05	0.000268034	6.13003	3.86777	4.99212	4.14536	1.30514	1.16517	0.666664	1.699	-1.13675	0.00016636	0.000876987	3.67233	2.32576	2.97598	2.56692	0.729913	0.707029	0.382476	0.923925	-1.26955	5.40005e-06	2.80195e-05	GO:0001649,GO:0005615,GO:0030514,GO:0045596	bone morphogenetic protein antagonist noggin;Smp_099440	Putative bone morphogenetic protein antagonist noggin [Source:UniProtKB/TrEMBL;Acc:G4VLQ1]	gi|4885523|ref|NP_005441.1|	noggin precursor [Homo sapiens]
SmVG_034311:Smp_165480	5.98787	7.06383	6.20171	6.27371	2.16111	1.45095	2.65131	3.27012	-1.42095	5e-05	0.000268034	9.90766	6.76314	8.78936	9.13144	1.07473	2.05107	1.08515	2.01947	-1.38559	1.48609e-13	5.45193e-12	5.71152	3.89508	4.92486	5.4706	0.557282	1.17726	0.54424	1.03007	-1.78713	9.57287e-17	4.39072e-15		hypothetical protein;Smp_165480	C4b-binding protein beta chain, putative [Source:UniProtKB/TrEMBL;Acc:C1LZY8]	gi|148886654|ref|NP_699197.3|	sushi, von Willebrand factor type A, EGF and pentraxin domain-containing protein 1 [Homo sapiens]
SmVG_034311:Smp_192300	5.98787	7.06383	6.20171	6.27371	2.16111	1.45095	2.65131	3.27012	-1.42095	5e-05	0.000268034	9.90766	6.76314	8.78936	9.13144	1.07473	2.05107	1.08515	2.01947	-1.38559	1.48609e-13	5.45193e-12	5.71152	3.89508	4.92486	5.4706	0.557282	1.17726	0.54424	1.03007	-1.78713	9.57287e-17	4.39072e-15		amphibian RCA protein 2;note=pfam_scan%3BPfam:PF00084.15%3B%3BE()%3D3.9E-4%3Bscore%3D20.5%3Bque ry 34-95%3Bdescription%3DSushi;note=iprscan%3BInterPro:IPR000436 : Sushi/SCR/CCP%3BPfam:PF00084%3B%3Bscore%3D2.1E-6%3Bquery 31-95%3Bdescription%3DSushi/SCR/CCP;Smp_192300	Putative uncharacterized protein [Source:UniProtKB/TrEMBL;Acc:C4QTP2]	_	_
Smp_074900	23.6471	24.717	23.356	18.6583	6.13447	9.6657	6.89213	11.1308	-1.41797	5e-05	0.000268034	28.2784	23.9467	24.1284	21.5514	3.0698	4.8561	6.1237	6.90642	-1.28808	8.0401e-20	6.40091e-18	16.0384	13.692	13.5177	12.706	1.56187	2.67691	3.02937	3.46465	-1.56881	3.94728e-16	1.70989e-14	GO:0005158	docking protein 3;Smp_074900	Putative uncharacterized protein [Source:UniProtKB/TrEMBL;Acc:G4VH18]	_	_
SmVG_035982	3.24662	4.34542	4.13477	3.27069	0.437189	0.629805	1.67637	2.88565	-1.41377	0.0013	0.00472404	2.9602	2.25959	2.91996	2.69392	0.156298	0.999352	0.495681	1.34844	-1.3263	0.00225921	0.00826493	2.62834	1.76596	2.2772	2.26112	0.0904288	0.895433	0.524872	0.849098	-1.11552	0.00116728	0.00321509
Smp_142050	8.2863	10.3755	8.39981	6.50956	2.64012	3.38595	2.73194	3.85673	-1.41211	5e-05	0.000268034	9.92716	7.72967	7.64535	6.65012	1.38264	1.79182	2.00047	2.04848	-1.15435	2.51239e-23	3.3796e-21	5.69123	4.41298	4.32298	3.93903	0.686802	0.987512	1.0371	1.01919	-1.47638	8.28165e-17	3.88152e-15	GO:0000165,GO:0000166,GO:0004672,GO:0004674,GO:0004707,GO:0005524,GO:0005622,GO:0006468,GO:0016301,GO:0016310,GO:0016740,GO:0016772	Serine/Threonine Kinase%2C CMGC Group%2C MAPK family%2C ERK subfamily;Smp_142050	Extracellular signal-regulated kinase 1/2,putative [Source:UniProtKB/TrEMBL;Acc:G4M1B1]	gi|158138507|ref|NP_001103361.1|	mitogen-activated protein kinase 3 isoform 3 [Homo sapiens]
Smp_200020	4.53167	5.71459	5.87604	4.46456	2.00527	1.63985	1.70788	2.41685	-1.40577	0.0003	0.00132569	4.42078	2.98223	3.98719	3.48018	0.927136	1.08572	0.841827	1.16294	-0.939087	3.8261e-09	6.03461e-08	2.56087	1.86588	2.41798	2.057	0.459073	0.563599	0.429304	0.579111	-1.31869	1.86037e-12	4.13378e-11		FAD NAD binding oxidoreductase;note=iprscan%3BInterPro:IPR004910 : Yippee-like protein%3BPfam:PF03226%3B%3Bscore%3D1.5E-74%3Bquery 1-131%3Bdescription%3DYippee-like protein;Smp_200020	Putative uncharacterized protein Smp_200020 [Source:UniProtKB/TrEMBL;Acc:G4V8Z0]	gi|188528706|ref|NP_001120871.1|	protein yippee-like 5 [Homo sapiens]
Smp_121920	2.32607	2.90227	2.27216	2.31362	0.890256	0.422619	0.879812	1.51251	-1.40531	5e-05	0.000268034	2.87299	2.38339	2.33381	2.86917	0.410454	0.655428	0.473209	0.945275	-1.16048	2.64752e-07	2.7468e-06	1.69451	1.41076	1.39297	1.71833	0.207843	0.338819	0.290585	0.528049	-1.35753	1.58524e-08	1.51242e-07	GO:0016020,GO:0016021,GO:0055085	vesicular amine transporter;Smp_121920	Putative vesicular amine transporter [Source:UniProtKB/TrEMBL;Acc:G4VGD1]	gi|215272390|ref|NP_001135796.1|	chromaffin granule amine transporter isoform b [Homo sapiens]
Smp_127460	9.01357	8.992	9.19089	7.9441	2.28986	3.63319	3.3126	4.0501	-1.40326	5e-05	0.000268034	13.935	12.8643	13.2539	14.5443	1.45579	3.33409	3.801	3.14391	-1.17482	1.15785e-09	2.0549e-08	8.47868	7.99524	8.00245	9.19191	0.957427	2.00072	2.05028	1.69756	-1.52075	4.50171e-19	2.92509e-17		hypothetical protein;Smp_127460	Putative myosin heavy chain [Source:UniProtKB/TrEMBL;Acc:G4VEV4]	gi|110227629|ref|NP_060900.2|	translin-associated factor X-interacting protein 1 [Homo sapiens]
Smp_144960	5.25784	7.59641	6.06626	5.65923	2.02504	2.0223	2.38779	2.86698	-1.40184	5e-05	0.000268034	6.31032	4.30078	4.95185	5.28201	0.734071	1.32461	0.995021	1.40498	-1.20631	2.39546e-17	1.52359e-15	3.66639	2.52084	2.84455	3.1742	0.394297	0.762942	0.504925	0.732722	-1.56514	4.21165e-18	2.37653e-16		FTS and Hook interacting protein;note=predicted by EVM2;note=pfam_scan%3BPfam:PF10257.4%3B%3BE()%3D3.1E-32%3Bscore%3D111.7%3Bqu ery 23-397%3Bdescription%3DRAI16-like;note=iprscan%3BInterPro:IPR019384 : Retinoic acid induced 16-like protein%3BPfam:PF10257%3B%3Bscore%3D2.2E-10%3Bquery 14-405%3Bdescription%3DRetinoic acid induced 16-like protein;Smp_144960	Putative uncharacterized protein [Source:UniProtKB/TrEMBL;Acc:G4VJR7]	_	_
Smp_205580	131.231	107.446	117.466	101.629	27.6557	46.3076	33.1986	66.3426	-1.39966	5e-05	0.000268034	129.407	139.419	140.949	130.01	14.2073	24.5495	27.1977	40.5268	-1.37136	2.9803e-20	2.50924e-18	120.358	124.761	129.006	122.469	13.6748	23.1676	23.1478	33.2505	-1.55419	1.56495e-14	5.00842e-13		hypothetical protein;Smp_205580
Smp_156910	51.4592	78.6105	63.1723	47.3362	22.1221	19.1869	21.4723	28.7571	-1.39406	5e-05	0.000268034	78.8726	47.1723	60.2914	50.2712	9.1299	14.6124	10.8326	16.2655	-1.24547	3.07198e-18	2.13996e-16	46.9601	28.2585	35.3533	30.9654	4.98333	8.5578	5.8085	8.75912	-1.5552	6.10655e-17	2.92603e-15		hypothetical protein;Smp_156910	Putative uncharacterized protein [Source:UniProtKB/TrEMBL;Acc:G4VKB9]	_	_
Smp_086530	214.221	273.836	287.607	271.752	95.3931	73.6891	82	148.563	-1.39004	5e-05	0.000268034	207.174	157.058	213.893	225.55	32.4531	43.9511	34.3492	66.0911	-1.18772	1.74768e-25	2.84071e-23	124.566	95.1134	127.273	140.135	17.9895	26.231	18.6732	36.1945	-1.47098	3.62765e-14	1.09173e-12	GO:0005509,GO:0005875,GO:0007017,GO:0030286	tegument-allergen-like protein;Sm20.8%3Bcurrent%3Dfalse;Smp_086530	Putative tegumental protein Sm 20.8; Sm 20.8; Tegumental antigen Sm20.8; Tegumental protein Sm 20.8 [Source:UniProtKB/TrEMBL;Acc:P91804]	_	_
Smp_158550	10.0145	11.1417	9.23551	8.86948	2.75428	4.06147	2.70736	5.46418	-1.38936	5e-05	0.000268034	10.2315	8.84738	8.59412	8.71461	1.18429	1.81079	2.43153	2.99018	-1.23207	4.49214e-15	2.11131e-13	5.87702	5.04673	4.82112	5.10687	0.595235	0.996057	1.16897	1.53818	-1.47873	6.79571e-12	1.36184e-10	GO:0001755,GO:0004872,GO:0005515,GO:0005615,GO:0007275,GO:0016020,GO:0016021,GO:0030215,GO:0030335,GO:0045499,GO:0048843,GO:0050919,GO:0071526	semaphorin 5A;Smp_158550	Semaphorin 5-related [Source:UniProtKB/TrEMBL;Acc:G4V9P9]	gi|91982767|ref|NP_001026872.2|	semaphorin-5B isoform 1 [Homo sapiens]
Smp_138010	2.22535	2.56294	2.91145	2.61665	0.711978	0.840841	1.13166	1.25833	-1.38764	5e-05	0.000268034	2.1495	1.92241	2.54649	2.4882	0.294111	0.769169	0.582919	0.915537	-1.0128	2.5112e-06	2.13115e-05	1.23101	1.14645	1.40079	1.4996	0.152008	0.465961	0.344913	0.446672	-1.12114	1.61984e-06	9.62812e-06		hypothetical protein;Smp_138010	Putative uncharacterized protein [Source:UniProtKB/TrEMBL;Acc:G4LZU7]	_	_
Smp_148670	2.93344	2.47482	1.96451	1.69374	0.892954	0.283654	1.27618	1.01684	-1.38577	5e-05	0.000268034	2.2879	2.69064	1.97448	1.67805	0.523908	0.982799	0.405986	0.570162	-0.903825	0.000131617	0.000714431	1.32209	1.58082	1.12805	1.00056	0.289997	0.556087	0.22394	0.293101	-1.09255	5.70701e-05	0.000227247	GO:0000155,GO:0000160,GO:0004871,GO:0005216,GO:0005249,GO:0005622,GO:0005887,GO:0006355,GO:0006810,GO:0006811,GO:0006813,GO:0007165,GO:0016020,GO:0016021,GO:0023014,GO:0034220,GO:0042391,GO:0055085,GO:0071805	voltage gated potassium channel;Smp_148670	Putative voltage-gated potassium channel [Source:UniProtKB/TrEMBL;Acc:G4V909]	gi|27437001|ref|NP_758872.1|	potassium voltage-gated channel subfamily H member 1 isoform 1 [Homo sapiens]
Smp_212330	1.59874	3.16037	1.92876	1.54899	0.734826	1.07878	0.275509	1.07924	-1.37836	0.0005	0.00207048	13.686	5.19121	7.39387	6.38265	0.988415	1.25014	1.67433	1.87691	-1.38641	3.86588e-06	3.13313e-05	8.0975	3.10031	4.31674	3.79338	0.537633	0.674805	0.885891	1.03414	-1.78193	2.59412e-07	1.86659e-06	GO:0003899,GO:0032774	DNA directed RNA polymerase III largest subunit;Smp_212330	Putative dna-directed RNA polymerase III largest subunit [Source:UniProtKB/TrEMBL;Acc:G4VLI8]	gi|55741655|ref|NP_066010.1|	anoctamin-8 [Homo sapiens]
Smp_151560	3.60202	4.76311	5.9829	6.19391	0.946361	1.98703	2.56037	2.42394	-1.37542	5e-05	0.000268034	3.93041	3.10502	4.82028	5.70225	0.547807	1.59117	1.37218	1.33977	-0.854302	0.000325238	0.0015683	2.21552	1.74333	2.64795	3.32839	0.269645	0.908409	0.645113	0.693063	-1.1932	3.37529e-06	1.8522e-05	GO:0000166,GO:0003677,GO:0005524,GO:0006260,GO:0017111	dna replication licensing factor mcm9;Smp_151560	Putative DNA replication licensing factor MCM1 [Source:UniProtKB/TrEMBL;Acc:G4V5N8]	gi|312284070|ref|NP_060166.2|	DNA replication licensing factor MCM9 isoform 1 [Homo sapiens]
Smp_175390	3.01538	3.52383	3.46516	2.84201	0.928967	0.725408	1.63378	1.66766	-1.37417	5e-05	0.000268034	2.74036	2.31105	2.74027	2.4867	0.501189	1.03413	0.5224	0.803017	-0.945271	2.42556e-07	2.53903e-06	1.6418	1.41597	1.65367	1.51076	0.278483	0.61002	0.288251	0.42974	-1.16511	5.07169e-09	5.43748e-08		hypothetical protein;Smp_175390	Putative uncharacterized protein [Source:UniProtKB/TrEMBL;Acc:C4QMY8]	_	_
Smp_170820	4.94532	8.85378	9.47852	5.75268	2.9116	2.38576	2.87443	3.03941	-1.37262	5e-05	0.000268034	12.12	6.41535	12.0145	7.93764	1.8697	3.03289	2.1087	2.72941	-1.0101	1.57522e-06	1.39763e-05	6.70855	3.58656	6.50123	4.60166	0.896509	1.58882	0.979637	1.32275	-1.32879	1.01904e-08	1.03436e-07	GO:0000166,GO:0005524,GO:0006200,GO:0006810,GO:0006855,GO:0008559,GO:0016020,GO:0016021,GO:0016787,GO:0016887,GO:0017111,GO:0042626,GO:0042908,GO:0055085	ATP binding cassette subfamily B (MDR:TAP);Smp_170820	Multidrug resistance protein 1, 2, 3 (P glycoprotein 1, 2, 3), putative [Source:UniProtKB/TrEMBL;Acc:G4M1X1]	gi|21536378|ref|NP_003733.2|	bile salt export pump [Homo sapiens]
Smp_043220	306.396	323.76	343.059	286.135	117.432	113.042	100.281	158.828	-1.36305	5e-05	0.000268034	244.458	223.229	253.523	233.153	40.6474	54.2401	52.8764	72.0144	-1.14832	1.45628e-41	1.00252e-38	141.685	130.987	144.794	140.247	21.5825	30.7379	27.0445	37.3295	-1.44121	2.17624e-22	2.27629e-20	GO:0016020,GO:0016021	hypothetical protein;note=predicted by EVM2;note=tmhmm%3B%3Bquery 1-208%3B;note=%3Bquery 193-208%3B;note=%3Bquery 170-192%3B;note=%3Bquery 1-169%3B;Smp_043220	Putative uncharacterized protein [Source:UniProtKB/TrEMBL;Acc:G4VIX8]	_	_
Smp_165170	12.183	14.1635	13.6275	12.368	2.3665	6.19902	4.41369	7.37325	-1.36277	5e-05	0.000268034	15.3138	12.3816	14.4417	14.299	1.25314	3.18536	4.17208	4.57294	-1.26169	2.61649e-06	2.21089e-05	8.78875	7.14699	8.18004	8.46467	0.652636	1.83179	2.12582	2.32476	-1.44909	2.04206e-08	1.89759e-07	GO:0005216,GO:0006810,GO:0006811,GO:0016020,GO:0016021,GO:0034220,GO:0055085	transient receptor potential cation channel;Smp_165170	Putative transient receptor potential cation channel,subfamily m, member [Source:UniProtKB/TrEMBL;Acc:G4VFC6]	gi|148612863|ref|NP_060142.3|	transient receptor potential cation channel subfamily M member 7 [Homo sapiens]
Smp_000755	75.1662	70.9519	59.3101	67.6615	17.3573	25.7367	27.0282	36.1065	-1.3622	5e-05	0.000268034	72.4299	73.7837	61.7454	76.6042	8.817	19.4357	15.8946	21.5518	-1.15811	1.08952e-22	1.27507e-20	40.9773	41.915	34.2516	44.7836	4.50588	10.6879	7.81049	10.7138	-1.46229	1.7313e-17	8.99961e-16	GO:0004222,GO:0006508,GO:0008237,GO:0016020,GO:0016021,GO:0016787	family M13 non peptidase ue (M13 family);Smp_000755	Family M13 non-peptidase homologue (M13 family) [Source:UniProtKB/TrEMBL;Acc:G4V669]	_	_
Smp_181070	500.981	452.728	422.26	375.515	117.025	207.315	103.735	253.858	-1.36088	5e-05	0.000268034	718.573	820.996	683.611	716.802	104.961	133.868	250.378	258.511	-1.13706	4.08073e-06	3.28904e-05	423.352	486.134	396.156	435.258	56.4749	76.9197	131.048	137.402	-1.30207	4.62842e-07	3.1357e-06		hypothetical protein;Smp_181070	Putative uncharacterized protein [Source:UniProtKB/TrEMBL;Acc:G4VC40]	_	_
Smp_154140	8.07691	8.44704	8.23382	7.13832	2.68887	3.18641	3.08738	3.49186	-1.35671	5e-05	0.000268034	10.5553	9.99452	10.2288	9.8113	1.55469	2.93218	2.43045	2.66422	-1.08713	7.4953e-20	6.00805e-18	6.14748	5.89126	5.78551	5.83326	0.842561	1.63259	1.2563	1.40184	-1.39298	1.5428e-23	2.00493e-21	GO:0004252,GO:0006508,GO:0016787	membrane bound transcription factor site 1;Smp_154140	Site-1 peptidase (S08 family) [Source:UniProtKB/TrEMBL;Acc:G4VKD8]	gi|4506775|ref|NP_003782.1|	membrane-bound transcription factor site-1 protease preproprotein [Homo sapiens]
Smp_019030	1365.84	1274.51	1459.94	1307.67	333.202	658.466	391.546	734.83	-1.35235	5e-05	0.000268034	1139.36	1167.57	1265.78	1244.69	137.495	249.765	368.078	397.327	-1.18118	4.65913e-08	5.87562e-07	648.073	668.497	702.001	729.145	71.0228	138.676	181.809	200.162	-1.39682	1.1087e-08	1.11713e-07	GO:0004197,GO:0005615,GO:0005764,GO:0006508,GO:0008233,GO:0008234,GO:0016787,GO:0051603	hypothetical protein;Smp_019030	Cathepsin C [Source:UniProtKB/Swiss-Prot;Acc:Q26563]	gi|189083844|ref|NP_001805.3|	dipeptidyl peptidase 1 isoform a preproprotein [Homo sapiens]
Smp_165670	19.2515	25.7859	17.8776	22.1894	6.18833	3.06652	3.31273	20.8135	-1.3502	0.01355	0.0338421	12.9816	9.05026	14.0982	13.103	0	3.44662	2.03634	3.2478	-1.77976	0.0166285	0.0440378	22.775	15.9933	22.2917	24.4666	0	3.89607	6.54611	5.65464	-1.55917	0.000344371	0.00110874	GO:0006810,GO:0016020,GO:0016021,GO:0055085	solute carrier family 12;Smp_165670
Smp_174510	6.90821	6.86094	6.21188	5.59071	2.2109	1.70344	1.86334	4.25682	-1.34958	5e-05	0.000268034	14.0952	14.1522	13.9814	13.4852	2.69974	3.82608	2.79026	5.6881	-1.08639	7.127e-26	1.2088e-23	8.25836	8.41227	8.05819	8.1939	1.46275	2.23248	1.52727	3.04743	-1.18977	3.63473e-10	4.94842e-09	GO:0005875,GO:0007017,GO:0030286	dynein light chain;Smp_174510	Putative dynein light chain [Source:UniProtKB/TrEMBL;Acc:G4V850]	gi|83267866|ref|NP_001032583.1|	dynein light chain 1, cytoplasmic [Homo sapiens]
Smp_126290	5.10205	6.07528	4.65219	4.15546	2.52671	0.770905	1.27635	3.28082	-1.34727	5e-05	0.000268034	5.67535	4.46183	3.94923	3.8665	1.42802	1.18652	0.615219	1.62147	-1.06894	0.0015619	0.00604661	3.32262	2.65509	2.26421	2.36045	0.760861	0.675971	0.3166	0.845955	-1.18181	5.65087e-05	0.00022543		hypothetical protein;Smp_126290	_	_	_
SmVG_025684:Smp_163700	7.71978	6.33333	7.14735	6.61812	1.95949	3.10659	2.52725	3.36268	-1.34432	5e-05	0.000268034	9.72231	10.9401	10.1039	10.3587	1.46119	2.03693	2.38547	2.61109	-1.23816	1.06837e-30	2.71808e-28	5.56581	6.27278	5.68231	6.18489	0.74202	1.1594	1.1519	1.30304	-1.60761	2.50638e-29	6.32271e-27		hypothetical protein;Smp_163700	Putative uncharacterized protein [Source:UniProtKB/TrEMBL;Acc:G4VTX2]	_	_
SmVG_025684:Smp_204320	7.71978	6.33333	7.14735	6.61812	1.95949	3.10659	2.52725	3.36268	-1.34432	5e-05	0.000268034	9.72231	10.9401	10.1039	10.3587	1.46119	2.03693	2.38547	2.61109	-1.23816	1.06837e-30	2.71808e-28	5.56581	6.27278	5.68231	6.18489	0.74202	1.1594	1.1519	1.30304	-1.60761	2.50638e-29	6.32271e-27		hypothetical protein;note=tmhmm%3B%3Bquery 1-150%3B;note=%3Bquery 44-55%3B;note=%3Bquery 111-116%3B;note=%3Bquery 24-43%3B;note=%3Bquery 56-73%3B;note=%3Bquery 88-110%3B;note=%3Bquery 117-136%3B;note=%3Bquery 1-23%3B;note=%3Bquery 74-87%3B;note=%3Bquery 137-150%3B;Smp_204320	Putative uncharacterized protein Smp_204320 [Source:UniProtKB/TrEMBL;Acc:G4VTX3]	_	_
Smp_212010	4.04092	6.37405	4.63352	3.46666	1.7947	2.87217	1.85657	0.77417	-1.34321	0.00015	0.000719901	9.88038	5.5043	7.26954	5.59182	0.994401	2.10598	2.02656	1.03218	-1.0444	4.70447e-06	3.74789e-05	6.30313	3.81794	4.63173	4.05799	0.649941	1.36805	1.16301	0.868059	-1.41492	3.35111e-08	2.97233e-07	GO:0000139,GO:0005789,GO:0008203,GO:0015485,GO:0016020,GO:0016021,GO:0032933	sterol regulatory element binding protein;phosphopantothenate cysteine ligase;Smp_212010	Sterol response element binding protein cleavage-activating protein, putative [Source:UniProtKB/TrEMBL;Acc:G4M1J9]	gi|66932902|ref|NP_036367.2|	sterol regulatory element-binding protein cleavage-activating protein [Homo sapiens]
Smp_131490	5.23727	3.68647	4.23081	3.49622	0.659979	2.34964	1.63714	1.93337	-1.3394	5e-05	0.000268034	3.25037	4.35128	3.644	3.09665	0.214893	0.802996	1.10366	0.858803	-1.42921	0.000388843	0.00182421	2.36512	3.04733	2.5357	2.37885	0.180345	0.619147	0.694541	0.530357	-1.56504	1.17071e-08	1.17166e-07	GO:0016020,GO:0016021	hypothetical protein;Smp_131490	Putative uncharacterized protein [Source:UniProtKB/TrEMBL;Acc:G4VTJ8]	_	_
Smp_147050	55.2126	65.7349	66.18	49.3882	18.9245	22.1549	21.1734	31.4796	-1.33532	5e-05	0.000268034	69.4813	56.8898	66.8819	56.7846	9.71919	15.6346	13.8724	19.4405	-1.17362	1.64328e-46	1.37367e-43	39.9159	32.909	37.4614	33.4502	4.99595	8.72885	6.8494	9.9954	-1.41884	6.22109e-19	3.89476e-17	GO:0005524,GO:0006810,GO:0006811,GO:0015991,GO:0015992,GO:0016820,GO:0033178,GO:0033180,GO:0046034,GO:0046961	v type proton atpase catalytic subunit a;Smp_147050	Putative atp synthase alpha subunit vacuolar [Source:UniProtKB/TrEMBL;Acc:G4VKT8]	gi|19913424|ref|NP_001681.2|	V-type proton ATPase catalytic subunit A [Homo sapiens]
Smp_213470	1.89759	2.97065	2.65246	1.94706	0.641708	1.088	0.813164	1.23948	-1.32374	5e-05	0.000268034	5.25792	3.16892	3.45807	3.41281	0.70258	1.14683	1.24875	1.43572	-0.906825	3.0686e-07	3.13915e-06	3.193	2.04988	2.243	2.30821	0.35414	0.675894	0.612914	0.738729	-1.23774	2.99625e-08	2.68255e-07	GO:0005198,GO:0005882,GO:0005637,GO:0005638	lamin%2C putative;Smp_213470
Smp_149240	3.7618	4.2631	4.39052	3.99978	1.726	1.42509	1.58689	1.84033	-1.31924	5e-05	0.000268034	4.26031	3.56966	4.31963	4.30145	0.790037	1.17071	1.0009	1.24489	-0.983764	2.70283e-12	7.75274e-11	2.39486	2.00204	2.33147	2.49767	0.461336	0.693529	0.463522	0.633328	-1.23766	9.23223e-16	3.7176e-14	GO:0005634	chromobox protein 2;Smp_149240	Putative chromobox protein [Source:UniProtKB/TrEMBL;Acc:G4VMB0]	_	_
SmVG_020234:Smp_164120	9.31425	10.1804	11.4975	9.30145	3.2092	3.34517	4.09139	5.50417	-1.31902	5e-05	0.000268034	8.14161	7.14384	9.05309	8.1567	1.20475	2.39556	1.7106	2.50373	-1.12215	3.01555e-30	6.9198e-28	4.70935	4.1912	5.1527	4.89793	0.641358	1.36864	0.885751	1.31912	-1.40558	3.06883e-19	2.02472e-17		protein dopey 1;Smp_164120	Dopey-related [Source:UniProtKB/TrEMBL;Acc:G4VL71]	gi|45827701|ref|NP_005119.2|	protein dopey-2 [Homo sapiens]
SmVG_020234:Smp_164130	9.31425	10.1804	11.4975	9.30145	3.2092	3.34517	4.09139	5.50417	-1.31902	5e-05	0.000268034	8.14161	7.14384	9.05309	8.1567	1.20475	2.39556	1.7106	2.50373	-1.12215	3.01555e-30	6.9198e-28	4.70935	4.1912	5.1527	4.89793	0.641358	1.36864	0.885751	1.31912	-1.40558	3.06883e-19	2.02472e-17		protein dopey 1;Smp_164130	Dopey-related [Source:UniProtKB/TrEMBL;Acc:G4VL72]	_	_
Smp_212360	71.7397	77.3934	73.7132	69.1906	25.5075	27.8802	28.9911	34.7317	-1.31828	5e-05	0.000268034	66.8939	58.8809	62.9287	64.4684	10.0399	18.437	14.7485	18.5915	-1.06488	3.41374e-39	1.90243e-36	38.4766	34.2602	35.6082	38.5303	5.27815	10.3342	7.50404	9.5742	-1.3782	2.951e-28	6.02636e-26	GO:0016020,GO:0016021	GRAM domain containing protein 1A;Smp_212360	Putative uncharacterized protein [Source:UniProtKB/TrEMBL;Acc:G4VBY5]	gi|187936935|ref|NP_060047.3|	GRAM domain-containing protein 1C isoform 1 [Homo sapiens]
Smp_129170	4.72812	6.02394	5.38237	3.88872	1.65205	1.22668	1.66843	3.48359	-1.31806	0.0002	0.000928806	5.11879	3.98273	4.48524	3.79164	0.803255	1.12736	0.714547	1.75701	-1.21161	1.27639e-16	7.32233e-15	3.11832	2.39092	2.66332	2.3534	0.424799	0.663647	0.399354	0.9595	-1.3198	1.02386e-07	8.13115e-07	GO:0004672,GO:0004674,GO:0005524,GO:0006468,GO:0016301,GO:0016310,GO:0016772	dual specificity;Smp_129170	Dual specificity kinase [Source:UniProtKB/TrEMBL;Acc:G4VEW3]	gi|31542768|ref|NP_653286.2|	homeodomain-interacting protein kinase 4 [Homo sapiens]
Smp_007780	2.75354	3.89632	3.58039	3.1867	0.970593	1.42558	1.15776	1.8373	-1.31537	5e-05	0.000268034	3.82413	2.71606	3.47755	3.32894	0.430625	0.953686	0.898995	1.13324	-1.07369	3.34274e-06	2.74913e-05	2.1483	1.52333	1.8997	1.9036	0.215049	0.514092	0.451706	0.557202	-1.29476	6.15932e-08	5.12898e-07		ubiquitin conjugating enzyme e2 o;Smp_007780	Putative uncharacterized protein [Source:UniProtKB/TrEMBL;Acc:G4VPX4]	_	_
Smp_152990	3.64071	2.41398	2.08149	1.86374	0.204266	0.574725	1.12917	2.11721	-1.31279	0.00325	0.0103569	2.07662	2.65566	2.00328	1.75232	0.131085	0.68592	0.339833	0.952284	-1.44234	0.00164514	0.00631868	1.19965	1.54887	1.14854	1.04975	0.0689961	0.388637	0.128526	0.491711	-1.36394	0.000403487	0.00127654	GO:0016020,GO:0016021	tetraspanin CD63 receptor;note=pfam_scan%3BPfam:PF00335.15%3B%3BE()%3D5.4E-11%3Bscore%3D42.0%3Bqu ery 52-173%3Bdescription%3DTetraspannin;note=iprscan%3BInterPro:IPR018499 : Tetraspanin%3BPfam:PF00335%3B%3Bscore%3D2.7E-11%3Bquery 35-176%3Bdescription%3DTetraspanin;Smp_152990	Putative uncharacterized protein [Source:UniProtKB/TrEMBL;Acc:G4VMV9]	_	_
Smp_136180	5.79496	7.00159	6.29518	5.53311	2.07892	2.28234	2.63968	2.91199	-1.31273	5e-05	0.000268034	7.8328	5.95297	6.48809	6.49048	0.998413	2.09808	1.7061	1.80385	-1.04297	3.68042e-18	2.54863e-16	4.44758	3.33251	3.60376	3.73912	0.526381	1.1268	0.750517	0.885777	-1.41373	5.75875e-20	4.3327e-18	GO:0003684,GO:0003887,GO:0006281	dna polymerase eta;Smp_136180	Putative DNA polymerase eta [Source:UniProtKB/TrEMBL;Acc:G4VAP7]	_	_
Smp_162510	7.29011	7.73317	8.24091	7.48536	2.00661	2.98454	3.31245	4.1031	-1.30945	5e-05	0.000268034	11.4853	10.8021	12.2986	12.2916	1.55472	3.61235	2.67301	3.8251	-1.10314	2.68639e-21	2.68708e-19	6.57372	6.20616	6.8103	7.22767	0.808978	2.01296	1.34578	1.90382	-1.35175	8.92447e-16	3.61062e-14	GO:0016020,GO:0016021,GO:0055085	drug efflux protein;Smp_162510	Putative uncharacterized protein [Source:UniProtKB/TrEMBL;Acc:G4VNP4]	_	_
Smp_149010	3.45474	3.66498	3.66749	2.79929	1.57962	0.872106	1.27114	1.77432	-1.30541	5e-05	0.000268034	3.07396	2.80557	2.97494	2.50239	0.596833	0.745505	0.452823	0.897143	-1.17553	2.82726e-12	8.08984e-11	1.82631	1.67481	1.73279	1.52531	0.324044	0.439416	0.228876	0.473301	-1.40613	9.72532e-11	1.49756e-09	GO:0005509,GO:0005886,GO:0007155,GO:0007156,GO:0016020,GO:0016021	protocadherin gamma b;Smp_149010	Cadherin-related [Source:UniProtKB/TrEMBL;Acc:G4LWK7]	gi|14589929|ref|NP_061908.1|	protocadherin-18 precursor [Homo sapiens]
Smp_179490	11.6183	14.6686	11.9552	9.80071	3.73074	3.7764	4.46702	7.4986	-1.30287	5e-05	0.000268034	15.2731	11.6955	12.6408	11.5973	2.13073	3.91432	3.45179	5.69748	-1.01605	4.62899e-22	4.83688e-20	8.9183	6.88126	7.26919	6.95288	1.13081	2.26867	1.88111	2.95952	-1.05601	2.06572e-07	1.52738e-06	GO:0005254,GO:0005887,GO:0016020,GO:0016021,GO:0034707,GO:1902476	hypothetical protein;Smp_179490	Bestrophin-related [Source:UniProtKB/TrEMBL;Acc:G4LYC4]	_	_
Smp_209010	8.92752	14.5219	11.5918	9.37713	3.30755	4.21433	4.92351	5.61012	-1.29872	5e-05	0.000268034	11.7127	7.36097	9.4285	8.57344	1.48876	3.42269	2.62123	3.10517	-0.929286	1.70203e-08	2.31346e-07	7.39009	4.55488	5.51108	5.51837	0.862719	2.22847	1.43151	1.52437	-1.1197	5.23703e-09	5.60075e-08	GO:0005515	hypothetical protein;Smp_209010	Putative uncharacterized protein [Source:UniProtKB/TrEMBL;Acc:G4V6A6]	_	_
Smp_144910	30.0922	39.4659	43.8021	33.2565	16.1805	12.9397	12.1367	18.5344	-1.29404	5e-05	0.000268034	49.7833	33.9751	52.285	42.2818	9.48273	10.9496	9.86707	14.4243	-1.05049	8.83165e-11	1.97246e-09	25.446	17.8539	26.0079	22.7612	4.39111	5.51178	4.41899	6.30757	-1.31788	3.98619e-14	1.18714e-12	GO:0005581	collagen type I:II:III:V:XI alpha;Smp_144910	Putative collagen alpha-1(V) chain [Source:UniProtKB/TrEMBL;Acc:G4VJQ2]	_	_
Smp_004420	35.1185	36.3923	44.2371	39.1269	3.11691	23.1639	10.6697	26.2232	-1.29371	5e-05	0.000268034	56.0847	54.9197	64.9511	68.9091	3.37964	12.1305	26.1215	25.3756	-1.30198	0.0106353	0.0302909	32.6743	32.2757	37.1856	41.3468	1.78173	6.86206	13.2358	13.06	-1.23358	0.00377675	0.00904332	GO:0016020,GO:0016021	hypothetical protein;Smp_004420	Putative uncharacterized protein [Source:UniProtKB/TrEMBL;Acc:G4LXI1]	_	_
Smp_038330	32.2943	30.83	26.6559	27.9093	11.0186	12.9385	11.2741	12.7971	-1.29303	5e-05	0.000268034	43.7035	44.2711	37.9056	39.8849	8.54026	12.4066	9.85277	12.5856	-0.970696	5.17609e-23	6.58432e-21	24.8555	25.3501	21.4686	24.2415	4.5117	6.73418	5.10401	6.49189	-1.23808	8.81424e-24	1.21935e-21	GO:0016765	nogo B receptor;Smp_038330	Putative uncharacterized protein [Source:UniProtKB/TrEMBL;Acc:G4VNU3]	gi|20270243|ref|NP_612468.1|	nogo-B receptor precursor [Homo sapiens]
Smp_126260	10.085	11.8363	11.3573	8.95568	3.81551	5.11125	3.22523	5.16713	-1.28605	5e-05	0.000268034	9.76471	7.56371	9.10376	7.8285	1.3801	1.96107	2.4733	2.4811	-1.09999	2.34891e-15	1.15123e-13	5.69888	4.4443	5.20322	4.711	0.72767	1.1106	1.25443	1.28881	-1.38875	7.98528e-16	3.26142e-14	GO:0004721,GO:0006470,GO:0016787	serine:threonine protein phosphatase 2B;Smp_126260	Serine/threonine-protein phosphatase [Source:UniProtKB/TrEMBL;Acc:G4VPZ6]	gi|6715568|ref|NP_000935.1|	serine/threonine-protein phosphatase 2B catalytic subunit alpha isoform isoform 1 [Homo sapiens]
Smp_146840	6.14644	7.15747	5.91969	5.91918	1.99362	1.64172	2.12882	4.54799	-1.2858	5e-05	0.000268034	7.04337	5.56151	5.71797	6.04537	0.753997	1.5236	0.81957	2.42623	-1.38051	3.63823e-16	1.99898e-14	4.16361	3.30921	3.31358	3.6702	0.421073	0.884837	0.428519	1.28959	-1.47884	1.67269e-07	1.26069e-06	GO:0005515,GO:0005576	netrin;Smp_146840	Putative netrin [Source:UniProtKB/TrEMBL;Acc:G4VPQ4]	gi|148613884|ref|NP_004813.2|	netrin-1 precursor [Homo sapiens]
Smp_126230	16.5254	18.6247	9.0361	10.6777	6.25861	5.69797	3.61804	6.94022	-1.28498	5e-05	0.000268034	11.2196	9.4635	5.42589	7.44795	1.45975	1.31874	2.15981	2.16325	-1.18562	5.92841e-05	0.00035326	7.75053	6.86847	3.82567	5.25551	1.08799	1.22436	1.47058	1.6597	-1.31879	1.89136e-06	1.10656e-05		hypothetical protein;Smp_126230	Putative uncharacterized protein [Source:UniProtKB/TrEMBL;Acc:G4M019]	_	_
SmVG_000246:Smp_194860	105.308	101.084	94.4076	90.8647	37.9831	48.4459	28.1977	46.1357	-1.28469	5e-05	0.000268034	119.898	117.411	110.364	113.755	31.0983	33.0796	48.1273	44.3907	-0.714797	1.82736e-05	0.000124552	57.1428	57.0753	50.9884	56.0562	11.0246	13.2618	16.8133	15.5254	-1.10959	9.98799e-12	1.91217e-10		hypothetical protein;Smp_194860	Putative uncharacterized protein [Source:UniProtKB/TrEMBL;Acc:G4V7C7]	_	_
SmVG_000246:Smp_194870	105.308	101.084	94.4076	90.8647	37.9831	48.4459	28.1977	46.1357	-1.28469	5e-05	0.000268034	119.898	117.411	110.364	113.755	31.0983	33.0796	48.1273	44.3907	-0.714797	1.82736e-05	0.000124552	57.1428	57.0753	50.9884	56.0562	11.0246	13.2618	16.8133	15.5254	-1.10959	9.98799e-12	1.91217e-10		histone H4;Smp_194870
Smp_128860	12.8915	9.812	10.8697	7.7911	4.54815	5.26484	3.14686	4.03493	-1.2833	5e-05	0.000268034	8.86217	11.0877	9.60926	7.57497	1.98286	2.00486	2.97351	2.24339	-1.00847	9.39731e-08	1.10418e-06	5.10611	6.46474	5.43201	4.49194	1.06747	1.1389	1.522	1.15593	-1.33388	2.35185e-08	2.15051e-07	GO:0005044,GO:0005507,GO:0006898,GO:0016020,GO:0016641,GO:0055114	lysyl oxidase 2;Smp_128860	Lysyl oxidase-like [Source:UniProtKB/TrEMBL;Acc:G4V971]	gi|14211943|ref|NP_115992.1|	lysyl oxidase homolog 3 precursor [Homo sapiens]
Smp_153990	9.24485	11.589	11.199	9.80602	4.16916	4.53999	4.3733	4.10785	-1.28325	5e-05	0.000268034	25.65	19.7113	24.4083	23.6942	3.92602	7.81592	6.13035	5.37467	-0.957765	7.13532e-23	8.78996e-21	14.4394	11.1107	13.4001	13.7887	1.79204	4.06801	2.86157	2.48251	-1.43018	2.03253e-25	3.3525e-23	GO:0008270,GO:0046872	LIM domain and actin binding protein 1;Smp_153990	Putative uncharacterized protein [Source:UniProtKB/TrEMBL;Acc:G4VJ55]	gi|165905589|ref|NP_001107018.1|	LIM domain and actin-binding protein 1 isoform a [Homo sapiens]
Smp_180810	14.2564	15.4648	17.5947	14.3496	6.08781	7.30071	4.68252	7.33904	-1.27906	5e-05	0.000268034	13.8241	12.2043	15.2318	13.9795	2.52966	3.06465	4.18327	3.90332	-1.02111	3.38504e-11	8.02145e-10	7.78383	6.94516	8.42186	8.13034	1.28576	1.67992	2.04241	1.93159	-1.34856	6.11093e-18	3.35984e-16	GO:0004867,GO:0005576,GO:0006030,GO:0006508,GO:0008061,GO:0008233,GO:0010951	Papilin;Smp_180810	Putative kunitz-type protease inhibitor [Source:UniProtKB/TrEMBL;Acc:G4V6G8]	_	_
Smp_171140	20.57	31.5644	23.8702	16.6173	7.75913	7.05943	9.82694	13.7482	-1.27048	5e-05	0.000268034	33.9237	22.8475	26.1648	21.919	5.45902	9.78148	6.45136	10.7851	-0.91839	1.92104e-13	6.87522e-12	20.3454	13.8391	15.3948	13.5542	3.03898	5.80744	3.44068	5.88673	-1.04197	5.93585e-08	4.97186e-07	GO:0016020,GO:0016021	serine rich repeat protein;note=predicted by EVM2;note=tmhmm%3B%3Bquery 1-789%3B;note=%3Bquery 765-789%3B;note=%3Bquery 742-764%3B;note=%3Bquery 1-741%3B;Smp_171140	Putative serine-rich repeat protein [Source:UniProtKB/TrEMBL;Acc:G4VCV5]	_	_
Smp_124520	28.4251	35.6822	30.9542	24.5789	10.1549	7.69326	10.3105	21.5081	-1.26835	5e-05	0.000268034	31.3481	25.2344	27.2102	24.3002	4.72466	7.1577	5.01022	12.2076	-1.17826	9.25138e-42	7.21793e-39	17.5495	14.3762	15.1647	14.2899	2.44196	4.03991	2.48809	6.18223	-1.22754	5.42153e-07	3.59355e-06		hypothetical protein;Smp_124520	Putative uncharacterized protein [Source:UniProtKB/TrEMBL;Acc:G4LXH8]	_	_
SmVG_011530	9.238	6.45169	8.41892	10.39	1.95719	5.73953	3.96994	2.69634	-1.26418	5e-05	0.000268034	5.5415	8.02941	7.37203	9.70631	1.00918	2.49414	3.08095	1.63532	-0.812717	0.00247558	0.00890069	3.24992	4.6997	4.21214	5.87314	0.508192	1.43936	1.56328	0.871641	-1.24138	1.36438e-06	8.27605e-06
Smp_191690	48.2102	29.4937	37.2908	37.2104	7.69796	2.44205	19.9239	33.3241	-1.26373	0.0015	0.00535086	48.5027	59.275	55.8639	54.8073	14.3489	28.6669	17.4261	21.8048	-0.53843	0.00927046	0.027065	34.4886	39.3996	38.7539	37.8854	9.03835	19.5252	10.8419	17.3051	-0.518403	0.0132502	0.0269028	GO:0016020,GO:0016021	tumor susceptibility gene 101 protein;Smp_191690
Smp_156530	6.59282	10.9265	8.07604	5.88955	3.15783	2.36253	2.05222	5.54746	-1.26289	5e-05	0.000268034	11.6917	6.52245	8.58677	6.39979	1.32374	1.48477	1.27139	3.41174	-1.40409	3.00473e-13	1.03121e-11	7.03205	3.96375	4.97957	3.93939	0.707745	0.833712	0.667038	1.78359	-1.44668	1.61044e-05	7.46634e-05	GO:0003824,GO:0004497,GO:0004504,GO:0005507,GO:0005515,GO:0006518,GO:0016020,GO:0016715,GO:0055114	peptidylglycine alpha amidating monooxygenase;Smp_156530
Smp_039810	2.83055	4.46791	3.90743	2.59489	1.41379	1.17562	1.05643	2.10891	-1.26192	5e-05	0.000268034	4.25472	2.54786	3.6591	2.76404	0.583923	0.700568	0.715065	1.20917	-1.20056	3.6661e-13	1.23288e-11	2.57581	1.55027	2.14379	1.71979	0.31118	0.434123	0.370907	0.652294	-1.38085	1.37302e-08	1.3428e-07	GO:0003676,GO:0008270,GO:0046872	muscleblind protein;Smp_039810	Muscleblind-like protein [Source:UniProtKB/TrEMBL;Acc:G4VSJ1]	_	_
Smp_149820	3.46759	4.03216	3.61112	4.20409	1.84015	1.71128	1.3352	1.51104	-1.25932	0.01275	0.032119	5.22072	4.53009	4.70343	5.21319	0.944275	1.32738	1.38895	1.27776	-0.940795	1.69268e-07	1.84446e-06	3.11336	2.70701	2.74396	3.17971	0.513811	0.785639	0.747069	0.693441	-1.31259	1.26768e-13	3.53016e-12	GO:0016020,GO:0016263,GO:0016267,GO:0016740,GO:0016757	glycoprotein N acetylgalactosamine;Smp_149820	Putative core 1 udp-galactose:n-acetylgalactosamine-alpha-r beta 1,3-galactosyltransferase [Source:UniProtKB/TrEMBL;Acc:G4VI51]	gi|9910144|ref|NP_064541.1|	glycoprotein-N-acetylgalactosamine 3-beta-galactosyltransferase 1 [Homo sapiens]
Smp_172400	13.4869	15.0905	14.1453	11.5187	4.46941	6.79713	5.43425	5.96897	-1.25863	5e-05	0.000268034	13.3332	11.7856	12.2644	11.3336	1.83893	3.54351	3.74252	3.30349	-1.02137	2.42904e-16	1.35367e-14	7.71398	6.86161	6.97035	6.75594	0.961119	1.9991	1.90585	1.72502	-1.32228	1.96208e-18	1.14481e-16	GO:0000166,GO:0005488,GO:0005515,GO:0005524,GO:0005622,GO:0005886,GO:0005942,GO:0007154,GO:0016301,GO:0016303,GO:0016310,GO:0016740,GO:0016772,GO:0016773,GO:0035005,GO:0035091,GO:0036092,GO:0046854,GO:0048015	phosphatidylinositol 4 phosphate 3 kinase C2;Smp_172400	Phosphatidylinositol-4,5-bisphosphate 3-kinase catalytic subunit alpha PI3K [Source:UniProtKB/TrEMBL;Acc:G4VAN8]	gi|157671929|ref|NP_002636.2|	phosphatidylinositol-4-phosphate 3-kinase C2 domain-containing subunit alpha [Homo sapiens]
Smp_158750	3.21787	3.55402	3.88758	3.18073	1.40435	0.97887	1.35996	2.08678	-1.24731	5e-05	0.000268034	3.02218	2.58349	3.17575	2.97534	0.521495	0.868681	0.489725	1.0318	-1.123	2.33643e-07	2.45735e-06	1.73312	1.48132	1.78268	1.74825	0.263923	0.480272	0.240321	0.517761	-1.33641	2.82706e-09	3.23302e-08	GO:0000981,GO:0003677,GO:0003700,GO:0005634,GO:0006351,GO:0006355,GO:0006357,GO:0043565	forkhead box protein C2 B;Smp_158750	Putative forkhead protein/ forkhead protein domain [Source:UniProtKB/TrEMBL;Acc:G4VQB5]	_	_
Smp_152050	69.2454	71.3482	75.978	61.1779	16.1117	30.386	22.7904	47.8138	-1.24602	5e-05	0.000268034	88.033	82.733	89.328	81.0712	9.03	20.303	23.8697	35.6613	-1.22289	5.97977e-10	1.12873e-08	52.2865	49.1278	51.6784	49.2142	4.76056	11.6362	12.2429	18.6193	-1.29866	1.77972e-06	1.04624e-05	GO:0005887,GO:0007166,GO:0016020,GO:0016021	tetraspanin similiar to uroplakin 1;Smp_152050	Putative tetraspanin 18, isoform 1 [Source:UniProtKB/TrEMBL;Acc:G4VB93]	_	_
SmVG_024145:Smp_161070	6.25685	6.99214	7.32034	6.64422	2.71495	2.52824	2.63734	3.59967	-1.24518	5e-05	0.000268034	7.6794	6.38515	7.81554	7.49673	1.33118	2.07749	1.36163	2.51974	-1.09938	1.48035e-13	5.44796e-12	4.46194	3.76645	4.45814	4.47875	0.670545	1.16148	0.667135	1.26185	-1.35805	6.34793e-13	1.57815e-11		hypothetical protein;note=predicted by EVM2;Smp_161070	Putative uncharacterized protein [Source:UniProtKB/TrEMBL;Acc:G4VRT5]	_	_
SmVG_024145:Smp_174550	6.25685	6.99214	7.32034	6.64422	2.71495	2.52824	2.63734	3.59967	-1.24518	5e-05	0.000268034	7.6794	6.38515	7.81554	7.49673	1.33118	2.07749	1.36163	2.51974	-1.09938	1.48035e-13	5.44796e-12	4.46194	3.76645	4.45814	4.47875	0.670545	1.16148	0.667135	1.26185	-1.35805	6.34793e-13	1.57815e-11		hypothetical protein;Smp_174550	Putative uncharacterized protein [Source:UniProtKB/TrEMBL;Acc:G4VRT4]	_	_
Smp_197410	15.351	16.1718	15.4181	14.1573	5.50803	7.35589	5.64611	7.26727	-1.24503	5e-05	0.000268034	12.7117	11.4197	12.0271	11.7255	1.88937	3.09391	3.39718	3.38497	-1.05662	1.9305e-27	3.64397e-25	7.77818	7.07189	7.14528	7.39528	1.05329	1.88123	1.84221	1.83999	-1.36891	9.32209e-24	1.26914e-21	GO:0005622,GO:0016020,GO:0016021,GO:0035556	DEP domain containing protein;Smp_197410	Putative dep domain containing protein [Source:UniProtKB/TrEMBL;Acc:G4VG93]	gi|339276028|ref|NP_001229825.1|	DEP domain-containing protein 5 isoform 4 [Homo sapiens]
Smp_153070	73.1095	52.5305	43.7236	43.8069	16.3401	30.0116	16.1948	27.5824	-1.24194	5e-05	0.000268034	132.137	182.005	105.832	127.254	17.7747	28.9129	41.6982	46.7485	-1.12888	3.8574e-06	3.12842e-05	77.5891	106.311	60.659	76.2552	9.11722	16.1228	20.6541	23.842	-1.33591	1.81347e-07	1.35963e-06		hypothetical protein;Smp_153070	Putative uncharacterized protein [Source:UniProtKB/TrEMBL;Acc:G4VMV0]	_	_
Smp_162500	1.6617	1.46897	1.67649	1.80235	0.558879	0.837379	0.565276	0.840854	-1.23789	0.0091	0.0244135	1.88867	2.10514	2.02678	2.4999	0.336156	0.505347	1.00608	0.666899	-0.841272	0.00267352	0.00948989	1.11307	1.22218	1.16536	1.59338	0.193696	0.287574	0.582273	0.355471	-1.02487	0.000401608	0.00127107	GO:0016020,GO:0016021,GO:0055085	drug efflux protein;Smp_162500	Drug efflux protein-related [Source:UniProtKB/TrEMBL;Acc:G4VNP5]	_	_
Smp_161250	17.8327	18.4258	22.5593	18.5883	7.38317	8.18147	7.3821	10	-1.23231	5e-05	0.000268034	17.7467	15.6394	20.5009	17.9055	3.00655	4.79061	4.74157	5.20806	-1.03861	4.44826e-28	8.97552e-26	10.1763	9.04382	11.5289	10.6242	1.56171	2.66069	2.37736	2.66295	-1.36319	2.61354e-23	3.02924e-21	GO:0006355,GO:0046983	microphthalmia associated transcription factor;Smp_161250	Putative uncharacterized protein [Source:UniProtKB/TrEMBL;Acc:G4M0B5]	gi|4557755|ref|NP_000239.1|	microphthalmia-associated transcription factor isoform 4 [Homo sapiens]
SmVG_019726:Smp_065000	6.87533	7.65964	6.87036	5.42847	2.39847	2.97015	2.36231	3.69761	-1.23141	5e-05	0.000268034	7.1202	6.19094	6.18548	5.34701	0.996674	1.50255	1.65598	1.99463	-1.13105	8.59391e-24	1.21174e-21	4.13312	3.63591	3.53764	3.22013	0.536419	0.877995	0.845547	1.05424	-1.34234	2.44326e-14	7.56529e-13		GDNF inducible zinc finger protein 1;Smp_065000	Putative uncharacterized protein [Source:UniProtKB/TrEMBL;Acc:G4LWQ9]	_	_
SmVG_019726:Smp_157260	6.87533	7.65964	6.87036	5.42847	2.39847	2.97015	2.36231	3.69761	-1.23141	5e-05	0.000268034	7.1202	6.19094	6.18548	5.34701	0.996674	1.50255	1.65598	1.99463	-1.13105	8.59391e-24	1.21174e-21	4.13312	3.63591	3.53764	3.22013	0.536419	0.877995	0.845547	1.05424	-1.34234	2.44326e-14	7.56529e-13		hypothetical protein;Smp_157260	Putative uncharacterized protein [Source:UniProtKB/TrEMBL;Acc:G4LWR0]	_	_
Smp_124390	37.6372	40.9963	33.8637	35.9644	15.5573	14.9357	15.8569	17.0534	-1.22746	5e-05	0.000268034	48.6607	42.831	41.623	46.3181	9.24897	14.0831	12.4817	13.0374	-0.884028	3.36049e-25	5.31457e-23	27.4945	24.4775	23.158	27.1341	4.67579	7.72202	6.08721	6.50795	-1.20247	2.85453e-31	8.74403e-29	GO:0006629,GO:0008152,GO:0016787	patatin phospholipase domain containing protein;Smp_124390	Putative uncharacterized protein [Source:UniProtKB/TrEMBL;Acc:G4VCI7]	gi|238776840|ref|NP_001139189.2|	patatin-like phospholipase domain-containing protein 1 isoform 3 [Homo sapiens]
Smp_160610	5.32661	5.388	6.50775	6.59522	2.24477	1.96438	3.5795	2.42078	-1.22212	5e-05	0.000268034	3.91627	3.7299	4.71452	5.44916	0.745965	1.83635	0.997886	1.0217	-0.861081	3.45286e-06	2.83571e-05	2.27245	2.18362	2.69314	3.29837	0.430408	1.07251	0.51314	0.530202	-1.25395	1.30132e-08	1.28293e-07	GO:0005622,GO:0007165	hypothetical protein;note=predicted by EVM2;Smp_160610	Putative uncharacterized protein [Source:UniProtKB/TrEMBL;Acc:G4VEM4]	_	_
SmVG_018935:Smp_143980	19.928	22.4498	23.727	19.4831	7.3051	8.69012	8.37298	12.3333	-1.22157	5e-05	0.000268034	20.3426	16.8001	20.1472	18.4504	2.92183	5.41946	4.73962	6.40158	-1.07157	1.1974e-36	4.83214e-34	11.7196	9.7467	11.389	10.9614	1.50557	3.02398	2.36847	3.25642	-1.3105	9.21174e-17	4.2478e-15		hypothetical protein;Smp_143980	Putative uncharacterized protein [Source:UniProtKB/TrEMBL;Acc:G4VKH9]	_	_
SmVG_018935:Smp_143990	19.928	22.4498	23.727	19.4831	7.3051	8.69012	8.37298	12.3333	-1.22157	5e-05	0.000268034	20.3426	16.8001	20.1472	18.4504	2.92183	5.41946	4.73962	6.40158	-1.07157	1.1974e-36	4.83214e-34	11.7196	9.7467	11.389	10.9614	1.50557	3.02398	2.36847	3.25642	-1.3105	9.21174e-17	4.2478e-15		hypothetical protein;Smp_143990	Putative uncharacterized protein [Source:UniProtKB/TrEMBL;Acc:G4VKI0]	_	_
Smp_174690	9.59753	11.1594	10.4221	9.83433	3.44974	3.55597	4.40697	6.19811	-1.21963	5e-05	0.000268034	13.1788	9.82364	11.212	11.1026	2.26229	3.78746	2.9757	4.28709	-0.899774	5.12334e-09	7.89967e-08	8.11471	6.16719	6.78679	7.31083	1.28688	2.29961	1.61029	2.34033	-1.1153	2.47911e-10	3.46873e-09	GO:0005622,GO:0006886	TOM1 protein 2 like;Smp_174690	Target of myb1 related (Tom1-related) [Source:UniProtKB/TrEMBL;Acc:G4VL94]	gi|131888135|ref|NP_001076437.1|	TOM1-like protein 2 isoform 3 [Homo sapiens]
Smp_017730	48.9702	50.1621	65.3895	51.1321	18.787	24.0976	16.6669	33.0612	-1.21944	5e-05	0.000268034	48.6064	44.2459	60.9598	51.8576	7.89516	11.0635	13.777	17.8745	-1.12895	7.52776e-14	2.9464e-12	28.0095	25.6645	34.4794	30.8461	4.12857	6.21652	6.93457	9.09905	-1.36359	1.20236e-11	2.25659e-10	GO:0005515	200-kDa GPI-anchored surface glycoprotein;Smp_017730	200-kDa GPI-anchored surface glycoprotein [Source:UniProtKB/TrEMBL;Acc:G4VP56]	_	_
Smp_102400	90.167	69.1553	67.8952	71.8965	12.6576	38.7137	22.0764	55.0905	-1.2185	5e-05	0.000268034	60.4026	72.7382	55.7039	66.3356	4.85527	12.9028	21.2009	27.7641	-1.27811	0.000275721	0.00135635	35.9226	43.6625	32.7529	40.797	2.60418	7.42734	11.0395	14.8118	-1.27108	0.000304078	0.000996589	GO:0000139,GO:0005794,GO:0006486,GO:0008378,GO:0016020,GO:0016021,GO:0016740,GO:0016757,GO:0047273	galactosyltransferase;Smp_102400	Putative beta1,3-galactosyltransferase [Source:UniProtKB/TrEMBL;Acc:G4VBF6]	gi|15451881|ref|NP_149360.1|	beta-1,3-galactosyltransferase 5 [Homo sapiens]
Smp_166060	2.06717	3.17784	2.55641	2.53042	1.02718	1.18221	1.01867	1.2167	-1.21692	0.0003	0.00132569	3.31786	2.18306	2.45031	2.6509	0.44485	0.627401	0.973013	0.993338	-0.937854	8.09377e-05	0.000466608	2.15047	1.39551	1.58435	1.78843	0.253885	0.392266	0.532663	0.540128	-1.19533	5.56702e-06	2.87641e-05	GO:0016020,GO:0016021	hypothetical protein;Smp_166060	Putative uncharacterized protein [Source:UniProtKB/TrEMBL;Acc:G4LV84]	_	_
SmVG_016350:Smp_063930	7.00491	7.42984	5.96479	6.08894	2.31216	2.42505	2.70745	3.99683	-1.21109	5e-05	0.000268034	6.80343	6.02038	5.14052	6.12584	0.917868	1.69953	1.2599	2.04982	-1.11948	9.40911e-16	4.91584e-14	4.04292	3.53544	2.98508	3.685	0.515944	0.980535	0.654826	1.06824	-1.3534	3.07734e-13	8.09642e-12		voltage gated potassium channel;Smp_063930	Putative voltage-gated potassium channel [Source:UniProtKB/TrEMBL;Acc:G4VIM0]	gi|27436984|ref|NP_004971.2|	potassium voltage-gated channel subfamily D member 3 isoform 1 [Homo sapiens]
SmVG_016350:Smp_156640	7.00491	7.42984	5.96479	6.08894	2.31216	2.42505	2.70745	3.99683	-1.21109	5e-05	0.000268034	6.80343	6.02038	5.14052	6.12584	0.917868	1.69953	1.2599	2.04982	-1.11948	9.40911e-16	4.91584e-14	4.04292	3.53544	2.98508	3.685	0.515944	0.980535	0.654826	1.06824	-1.3534	3.07734e-13	8.09642e-12		potassium voltage gated channel subfamily C;Smp_156640	Putative voltage-gated potassium channel [Source:UniProtKB/TrEMBL;Acc:G4VIM1]	gi|24497460|ref|NP_004968.2|	potassium voltage-gated channel subfamily C member 3 [Homo sapiens]
SmVG_031577	36.596	35.3909	30.5404	27.0216	15.035	14.4442	11.722	14.8496	-1.20869	5e-05	0.000268034	27.3365	26.8436	22.8789	22.5091	5.28666	6.43347	6.89597	6.9932	-0.98248	3.56599e-22	3.82869e-20	16.0954	15.9028	13.1611	13.7082	2.84096	3.74784	3.51504	3.64346	-1.28511	2.12248e-20	1.70135e-18	GO:0005875,GO:0007017
Smp_149970	2.13707	1.82781	2.22661	2.04639	0.081966	1.29531	0.787494	1.40026	-1.20836	0.0003	0.00132569	3.7819	3.89317	3.87388	3.76191	0.302138	1.07908	1.26606	1.77062	-1.20121	0.000367354	0.00174125	2.21066	2.25029	2.20491	2.28124	0.162958	0.635137	0.648092	0.912593	-1.12882	0.000372378	0.00118749		hypothetical protein;Smp_149970	Putative uncharacterized protein [Source:UniProtKB/TrEMBL;Acc:G4VI30]	_	_
Smp_146790	2.07844	4.03498	2.81164	2.21517	1.33944	0.620555	1.10476	1.76743	-1.20503	0.00045	0.00189572	3.54557	1.96305	2.23057	2.1696	0.478659	0.566737	0.397708	0.815256	-1.19461	6.17039e-06	4.73522e-05	2.21254	1.24029	1.38932	1.37887	0.280345	0.351566	0.22636	0.466996	-1.4585	1.46388e-06	8.83583e-06	GO:0005125,GO:0005160,GO:0005576,GO:0005615,GO:0008083,GO:0010862,GO:0042981,GO:0043408,GO:0048468,GO:0060395	Bone Morphogenetic Protein (BMP) subfamily%2C fragment;Smp_146790	_	_	_
Smp_007210	4.20547	7.50973	4.53699	3.58064	2.0488	1.85871	1.58462	3.11173	-1.20483	5e-05	0.000268034	7.17982	4.01623	4.33711	3.75228	1.06905	1.29396	1.11256	1.75089	-1.02561	8.59509e-08	1.01983e-06	4.06508	2.29553	2.4188	2.20011	0.532486	0.715311	0.550055	0.894729	-1.19681	3.91938e-06	2.11027e-05	GO:0005096,GO:0005097,GO:0005622,GO:0006886,GO:0012505,GO:0017137,GO:0031338,GO:0032313,GO:0032851,GO:0090630	rab GTPase activating protein 1;Smp_007210	Putative rab6 gtpase activating protein, gapcena (Rabgap1 protein) [Source:UniProtKB/TrEMBL;Acc:G4VB12]	gi|164519084|ref|NP_036329.3|	rab GTPase-activating protein 1 [Homo sapiens]
Smp_167630	6.78347	6.31688	5.88122	5.99816	2.00415	4.01576	1.51461	3.33896	-1.19994	5e-05	0.000268034	6.14923	5.92547	5.44463	5.91875	0.885643	1.02197	2.43579	1.8064	-1.05299	0.000631625	0.00277682	3.52363	3.43497	3.08086	3.53292	0.463522	0.574659	1.2515	0.911413	-1.27036	6.65021e-06	3.39113e-05	GO:0005385,GO:0005887,GO:0006882,GO:0016020,GO:0016021,GO:0030001,GO:0046873,GO:0055085,GO:0071578	zinc transporter foi;Smp_167630	Solute carrier family, putative [Source:UniProtKB/TrEMBL;Acc:G4LVV0]	gi|223633937|ref|NP_689938.2|	zinc transporter ZIP12 isoform 2 [Homo sapiens]
Smp_007760	23.6723	32.2288	23.0928	23.2648	13.1557	10.3	9.01141	12.0661	-1.19927	5e-05	0.000268034	49.6016	36.5322	39.2017	41.2622	11.5853	11.3391	13.9905	13.0598	-0.772446	4.48361e-06	3.58658e-05	27.814	20.7016	21.6238	24.0618	5.77212	6.15281	6.76151	6.47442	-1.03634	1.34529e-11	2.48675e-10	GO:0003824,GO:0004021,GO:0008483,GO:0009058,GO:0016740,GO:0030170	alanine aminotransferase 2;Smp_007760	Putative alanine aminotransferase [Source:UniProtKB/TrEMBL;Acc:G4VPX8]	gi|19263340|ref|NP_597700.1|	alanine aminotransferase 2 isoform 1 [Homo sapiens]
SmVG_014995:Smp_163040	5.24784	6.25265	6.8791	6.29313	1.96557	2.3364	2.76092	3.70912	-1.19563	5e-05	0.000268034	5.67519	4.47902	5.9935	6.04382	0.845214	1.87896	1.47419	2.02838	-0.957103	3.2177e-13	1.09467e-11	3.2403	2.60055	3.35139	3.5629	0.431559	1.06735	0.774676	1.02889	-1.16028	6.83389e-11	1.08948e-09		nuclear pore complex protein Nup205;note=predicted by EVM2;note=pfam_scan%3BPfam:PF11894.3%3B%3BE()%3D1.0E-82%3Bscore%3D277.8%3Bqu ery 31-848%3Bdescription%3DDUF3414;note=pfam_scan%3BPfam:PF11894.3%3B%3BE()%3D2.4E-16%3Bscore%3D57.8%3Bque ry 1557-2010%3Bdescription%3DDUF3414;note=pfam_scan%3BPfam:PF11894.3%3B%3BE()%3D9.6E-22%3Bscore%3D75.7%3Bque ry 1137-1486%3Bdescription%3DDUF3414;Smp_163040	Putative uncharacterized protein [Source:UniProtKB/TrEMBL;Acc:G4LW83]	gi|57634534|ref|NP_055950.1|	nuclear pore complex protein Nup205 [Homo sapiens]
SmVG_014995:Smp_185620	5.24784	6.25265	6.8791	6.29313	1.96557	2.3364	2.76092	3.70912	-1.19563	5e-05	0.000268034	5.67519	4.47902	5.9935	6.04382	0.845214	1.87896	1.47419	2.02838	-0.957103	3.2177e-13	1.09467e-11	3.2403	2.60055	3.35139	3.5629	0.431559	1.06735	0.774676	1.02889	-1.16028	6.83389e-11	1.08948e-09		nuclear pore complex protein Nup205;Smp_185620	Putative uncharacterized protein [Source:UniProtKB/TrEMBL;Acc:G4LW84]	_	_
Smp_143340	1.93607	2.73983	2.93865	2.22279	1.21562	0.824357	0.820315	1.43761	-1.19464	5e-05	0.000268034	3.00777	1.93326	2.71475	2.4365	0.412552	0.437479	0.398671	0.755817	-1.35296	3.25068e-12	9.18905e-11	2.12751	1.8445	1.99654	1.86581	0.385432	0.668582	0.315405	0.565774	-1.2377	2.4022e-10	3.37212e-09		methionine sulfoxide reductase;Smp_143340	Methionine sulfoxide reductase,putative [Source:UniProtKB/TrEMBL;Acc:G4M1U1]	_	_
Smp_199290	85.4	79.486	72.5067	100.45	30.1723	30.8689	37.0179	50.1233	-1.18898	5e-05	0.000268034	69.6784	71.2813	61.5248	93.8793	12.1968	23.6488	16.9795	26.8222	-0.904173	7.92052e-15	3.58379e-13	44.3039	45.5033	38.7504	61.7712	7.00542	14.4904	9.07672	15.0329	-1.18248	1.0287e-10	1.57556e-09	GO:0005887,GO:0016020,GO:0016021,GO:0022841,GO:0030322,GO:0071805	twik family of potassium channels;Smp_199290
Smp_056700	3.19184	4.22055	5.34384	7.26907	1.68619	2.35312	2.28395	2.46306	-1.18849	5e-05	0.000268034	5.07648	3.73111	5.67304	7.98967	1.18211	2.09577	1.9425	1.84517	-0.602812	7.15359e-06	5.40817e-05	2.36279	1.6758	2.74941	4.23483	0.401546	0.878833	0.744994	0.760735	-1.16211	3.0327e-07	2.14971e-06	GO:0008270,GO:0016020,GO:0016021,GO:0046872	membrane associated RING finger protein;Smp_056700	Membrane associated ring finger 1,8, putative [Source:UniProtKB/TrEMBL;Acc:G4LYD2]	_	_
SmVG_000881:Smp_212840	46.2352	42.2575	43.1956	37.1935	12.7928	19.6797	16.3948	25.3071	-1.18702	0.0005	0.00207048	39.1346	39.6629	37.4299	36.1253	5.38264	10.5826	10.8588	13.6842	-1.07773	5.20361e-19	3.80611e-17	22.5576	22.8981	20.997	21.3594	2.74739	5.86986	5.41668	6.91225	-1.2613	1.31079e-11	2.43626e-10		PQ loop repeat containing protein 2;Smp_212840
SmVG_000881:Smp_212850	46.2352	42.2575	43.1956	37.1935	12.7928	19.6797	16.3948	25.3071	-1.18702	0.0005	0.00207048	39.1346	39.6629	37.4299	36.1253	5.38264	10.5826	10.8588	13.6842	-1.07773	5.20361e-19	3.80611e-17	22.5576	22.8981	20.997	21.3594	2.74739	5.86986	5.41668	6.91225	-1.2613	1.31079e-11	2.43626e-10		Mername AA168 protein (M67 family);Smp_212850
Smp_153000	4.36837	5.26709	5.44527	4.40256	2.15678	2.2996	1.84504	2.27822	-1.18325	0.0005	0.00207048	5.85921	4.79691	5.89451	5.40754	1.24301	1.62479	1.89905	1.72979	-0.817301	1.53768e-09	2.6542e-08	3.33724	2.73659	3.3232	3.22304	0.67435	0.903729	0.907414	0.867046	-1.10266	6.91733e-12	1.37977e-10		hypothetical protein;Smp_153000	Putative uncharacterized protein [Source:UniProtKB/TrEMBL;Acc:G4VMV6]	_	_
Smp_074080	23.9635	23.1563	28.2639	26.6938	9.3328	11.082	10.6797	13.8632	-1.18302	5e-05	0.000268034	17.8546	17.7833	21.6056	22.5843	3.19311	6.31133	5.45846	6.45029	-0.941842	5.90091e-20	4.82926e-18	10.1706	10.1934	12.0435	13.2694	1.59751	3.45604	2.69147	3.26116	-1.24773	1.16636e-16	5.29305e-15	GO:0000166,GO:0004672,GO:0005524,GO:0006468,GO:0016301,GO:0016310,GO:0016772	serine:threonine protein kinase NLK;Smp_074080	Serine/threonine kinase [Source:UniProtKB/TrEMBL;Acc:G4VGJ2]	gi|149408126|ref|NP_057315.3|	serine/threonine-protein kinase NLK [Homo sapiens]
Smp_194960	50.1942	59.1979	51.9779	41.628	19.7138	13.136	21.7243	34.8871	-1.18213	5e-05	0.000268034	105.889	85.6903	96.2049	86.2796	16.3515	24.3854	13.7186	37.0805	-1.23438	1.11075e-15	5.68552e-14	65.1528	53.1414	58.354	54.9955	9.54608	15.4813	7.74539	20.9376	-1.33542	2.30592e-08	2.11754e-07	GO:0005887,GO:0007166,GO:0016020,GO:0016021	25 kDa integral membrane protein;Smp_194960	Similar to tetraspanin TE736 [Source:UniProtKB/TrEMBL;Acc:G4LW56]	_	_
SmVG_015690:Smp_119050	43.9932	59.3246	63.587	47.0129	23.1626	22.9149	18.44	29.8878	-1.18012	5e-05	0.000268034	83.4433	54.3952	81.8734	63.6285	15.4279	18.091	18.8199	25.6003	-0.982496	7.81045e-10	1.44859e-08	42.3439	28.3053	40.655	33.9769	7.14933	9.07187	8.4039	11.3461	-1.18572	1.29388e-10	1.93002e-09		collagen alpha chain;Smp_119050	Putative collagen alpha chain [Source:UniProtKB/TrEMBL;Acc:G4VIR7]	_	_
SmVG_015690:Smp_135560	43.9932	59.3246	63.587	47.0129	23.1626	22.9149	18.44	29.8878	-1.18012	5e-05	0.000268034	83.4433	54.3952	81.8734	63.6285	15.4279	18.091	18.8199	25.6003	-0.982496	7.81045e-10	1.44859e-08	42.3439	28.3053	40.655	33.9769	7.14933	9.07187	8.4039	11.3461	-1.18572	1.29388e-10	1.93002e-09		collagen alpha 2(I) chain;Smp_135560	Putative collagen alpha-1(I) chain [Source:UniProtKB/TrEMBL;Acc:G4VIR6]	gi|89363017|ref|NP_000384.2|	collagen alpha-2(V) chain preproprotein [Homo sapiens]
SmVG_029207	4.16749	5.74717	3.92826	3.86761	2.36935	2.16409	1.41059	1.87255	-1.18	5e-05	0.000268034	5.07284	3.75169	3.51879	3.7087	1.15976	1.28354	1.72636	1.10152	-0.651439	0.000217547	0.0011108	3.1464	2.22695	2.15426	2.4748	0.490937	0.553378	0.662226	0.561582	-1.30671	6.77188e-12	1.36024e-10	GO:0007155,GO:0016020
Smp_168000	1.83819	2.43297	1.88466	2.2155	0.845195	0.590012	0.877995	1.38336	-1.17927	5e-05	0.000268034	2.77138	2.16613	2.39335	3.01233	0.632333	0.829718	0.576548	1.03355	-0.849624	5.09802e-08	6.38044e-07	1.6225	1.26742	1.3484	1.7895	0.333642	0.478247	0.271353	0.538718	-1.07203	1.30585e-07	1.00923e-06	GO:0008028,GO:0015718,GO:0016020,GO:0016021,GO:0055085	monocarboxylate transporter;Smp_168000	Putative monocarboxylate transporter [Source:UniProtKB/TrEMBL;Acc:G4V6E0]	gi|34916028|ref|NP_919274.1|	monocarboxylate transporter 9 [Homo sapiens]
Smp_159400	4.77824	5.00486	5.4112	4.99406	1.44857	2.73298	2.2769	2.45859	-1.17888	5e-05	0.000268034	6.16078	6.18232	6.5684	6.80845	0.84881	1.93361	1.86461	1.84429	-1.03328	6.46049e-12	1.75831e-10	3.71919	3.73195	3.76145	4.20312	0.446976	1.16151	0.963907	0.948921	-1.3484	9.10755e-17	4.22245e-15	GO:0006810,GO:0016021	phospholipid transport protein;Smp_159400	Phospholipid transport protein [Source:UniProtKB/TrEMBL;Acc:G4VCQ4]	gi|7110715|ref|NP_036561.1|	SEC14-like protein 2 isoform 1 [Homo sapiens]
Smp_139230	9.17782	8.98856	10.4297	9.42801	3.86726	5.00656	3.32921	4.59317	-1.17878	5e-05	0.000268034	11.8084	10.8054	12.2051	12.1451	1.98766	2.64513	3.19921	3.21613	-1.07402	3.81347e-22	4.05718e-20	6.58666	6.05717	6.69906	6.98111	0.925975	1.37904	1.60313	1.60274	-1.42905	5.55413e-21	4.76378e-19	GO:0004653,GO:0016020,GO:0016021,GO:0016740,GO:0016757	polypeptide N acetylgalactosaminyltransferase;Smp_139230	N-acetylgalactosaminyltransferase, putative [Source:UniProtKB/TrEMBL;Acc:G4LUT9]	_	_
Smp_018150	39.8292	40.8111	42.8109	39.5121	14.7908	15.3648	17.4208	24.4713	-1.17752	5e-05	0.000268034	51.4094	43.7716	49.6315	49.1919	7.968	13.9422	11.164	17.4832	-1.0615	1.86197e-37	7.78238e-35	29.3977	25.3264	28.0124	29.2511	4.10845	7.75276	5.63958	8.99387	-1.28111	2.99515e-15	1.10255e-13	GO:0000139,GO:0004571,GO:0005509,GO:0005783,GO:0006491,GO:0008152,GO:0016020,GO:0016021,GO:0016787,GO:0016798	mannosyl oligosaccharide 1%2C2 alpha mannosidase;Smp_018150	Putative mannosyl-oligosaccharide alpha-1,2-mannosidase [Source:UniProtKB/TrEMBL;Acc:G4VP10]	gi|218749883|ref|NP_057303.2|	endoplasmic reticulum mannosyl-oligosaccharide 1,2-alpha-mannosidase [Homo sapiens]
Smp_144030	29.125	37.2926	30.4113	22.6759	11.0236	9.66375	13.4469	18.7454	-1.17628	5e-05	0.000268034	33.1597	26.831	28.0465	26.1632	5.82537	10.661	7.37835	12.2237	-0.89092	5.08558e-21	4.64973e-19	19.9654	16.2993	17.0688	16.5413	3.32762	6.34518	4.21764	6.94873	-0.983608	4.13449e-09	4.50591e-08	GO:0004605,GO:0005789,GO:0006655,GO:0016020,GO:0016021,GO:0016024,GO:0016740,GO:0016772,GO:0016779	phosphatidate cytidylyltransferase;Smp_144030	Phosphatidate cytidylyltransferase [Source:UniProtKB/TrEMBL;Acc:G4VKI9]	gi|20143480|ref|NP_003809.1|	phosphatidate cytidylyltransferase 2 [Homo sapiens]
Smp_138750	21.8193	24.7312	18.6148	18.6293	8.43679	7.04035	9.84778	11.7614	-1.17597	5e-05	0.000268034	20.7016	17.0618	14.7546	16.4202	3.24851	5.72972	3.92522	6.00377	-0.977242	5.57318e-15	2.56783e-13	12.4484	10.598	9.03083	10.3216	1.73092	3.44063	2.0238	3.12045	-1.24337	4.68948e-13	1.19707e-11	GO:0006487,GO:0008424,GO:0016740,GO:0016757,GO:0036071,GO:0046921	alpha fucosyltransferase m%3B alpha fucosyltransferase k%3B alpha fucosyltransferase j%3B alpha fucosyltransferase i;Smp_138750	Putative uncharacterized protein Smp_138750 [Source:UniProtKB/TrEMBL;Acc:G4LW42]	gi|30410726|ref|NP_835368.1|	alpha-(1,6)-fucosyltransferase isoform a [Homo sapiens]
SmVG_020021:Smp_141980	2.32254	2.95894	2.66513	2.23951	0.932836	0.760016	0.921067	1.89673	-1.1752	0.0057	0.0165061	2.0987	1.38759	1.58489	1.4786	0.263004	0.3427	0.250954	0.580069	-1.32927	2.75686e-11	6.62496e-10	1.50646	1.0557	1.22769	1.24774	0.258354	0.315791	0.235284	0.437724	-1.1905	9.52791e-08	7.61611e-07		cAMP specific 3'%2C5' cyclic phosphodiesterase 4D;Smp_141980	Putative camp-specific 3,5-cyclic phosphodiesterase [Source:UniProtKB/TrEMBL;Acc:G4VM44]	gi|149363666|ref|NP_001092289.1|	cAMP-specific 3',5'-cyclic phosphodiesterase 4C isoform PDE4C-2 [Homo sapiens]
SmVG_020021:Smp_141990	2.32254	2.95894	2.66513	2.23951	0.932836	0.760016	0.921067	1.89673	-1.1752	0.0057	0.0165061	2.0987	1.38759	1.58489	1.4786	0.263004	0.3427	0.250954	0.580069	-1.32927	2.75686e-11	6.62496e-10	1.50646	1.0557	1.22769	1.24774	0.258354	0.315791	0.235284	0.437724	-1.1905	9.52791e-08	7.61611e-07		3' 5' cyclic nucleotide phosphodiesterase;Smp_141990	Putative uncharacterized protein [Source:UniProtKB/TrEMBL;Acc:G4VM43]	_	_
Smp_159650	17.7835	15.8465	14.2882	13.8193	2.8189	9.29649	5.61514	9.64068	-1.17349	5e-05	0.000268034	19.8398	21.1498	16.9889	18.6231	1.26383	4.90892	6.91509	6.48284	-1.26508	0.00236904	0.00858887	17.0081	18.3098	13.5078	16.3868	1.00398	3.74578	4.77429	4.66887	-1.43899	9.08065e-06	4.4994e-05	GO:0016020,GO:0016021	N methyl D aspartate receptor associated;note=tmhmm%3B%3Bquery 1-169%3B;Smp_159650	Putative uncharacterized protein [Source:UniProtKB/TrEMBL;Acc:G4LZR4]	_	_
Smp_152090	2.68276	4.2776	3.55888	3.34452	2.24116	1.36024	0.921859	1.63406	-1.17095	5e-05	0.000268034	3.72593	2.26676	3.05385	3.2137	0.941761	0.707077	0.763429	0.907873	-0.864137	0.000743884	0.00319944	2.13852	1.32806	1.74303	1.91763	0.489707	0.378833	0.354013	0.462261	-1.22245	1.42903e-06	8.63763e-06	GO:0016020,GO:0016021	hypothetical protein;Smp_152090	Putative uncharacterized protein [Source:UniProtKB/TrEMBL;Acc:G4VB97]	_	_
Smp_136800	13.9155	11.3752	13.0067	12.3268	4.71228	7.03346	5.06091	5.67919	-1.17081	5e-05	0.000268034	7.95153	9.0813	8.95247	9.0362	1.51787	2.63491	3.0254	2.52633	-0.889457	2.23759e-11	5.56872e-10	5.07756	6.08822	5.59669	6.19944	0.861146	1.61679	1.81385	1.42725	-1.20642	9.37661e-13	2.22779e-11	GO:0005622,GO:0006810	phosphatidylinositol transfer protein;Smp_136800	Phosphatidylinositol transfer protein [Source:UniProtKB/TrEMBL;Acc:C4Q4J8]	gi|195927015|ref|NP_004901.2|	membrane-associated phosphatidylinositol transfer protein 1 isoform a [Homo sapiens]
Smp_121190	3.83712	4.51185	3.51592	2.93436	1.73369	1.25612	1.31934	2.27441	-1.16858	5e-05	0.000268034	4.16214	3.36213	3.23412	3.09938	0.830623	1.05416	0.812631	1.27828	-0.938163	1.29181e-06	1.16832e-05	2.4414	1.97437	1.84302	1.85427	0.438883	0.593494	0.412377	0.661397	-1.12667	1.94549e-07	1.44722e-06	GO:0005216,GO:0005244,GO:0005249,GO:0005251,GO:0005267,GO:0005515,GO:0006810,GO:0006811,GO:0006813,GO:0008076,GO:0016020,GO:0016021,GO:0034765,GO:0051260,GO:0055085,GO:0071805	voltage gated potassium channel;Smp_121190	Voltage-gated potassium channel,putative [Source:UniProtKB/TrEMBL;Acc:G4LZ18]	gi|25952108|ref|NP_002243.3|	potassium voltage-gated channel subfamily S member 3 [Homo sapiens]
SmVG_012159:Smp_099800	23.5615	29.8807	25.8714	20.7283	9.315	12.5479	9.91436	12.7624	-1.16744	5e-05	0.000268034	36.3927	30.1831	31.5658	29.6718	5.97369	10.1281	10.3475	10.9341	-0.905074	3.01191e-23	4.00549e-21	20.8256	17.3373	17.7008	17.4952	3.12369	5.62973	5.1966	5.53888	-1.11869	3.88963e-15	1.41963e-13		hypothetical protein;Smp_099800	Putative uncharacterized protein [Source:UniProtKB/TrEMBL;Acc:G4VGH2]	gi|21536371|ref|NP_009041.2|	telomerase protein component 1 [Homo sapiens]
SmVG_012159:Smp_099810	23.5615	29.8807	25.8714	20.7283	9.315	12.5479	9.91436	12.7624	-1.16744	5e-05	0.000268034	36.3927	30.1831	31.5658	29.6718	5.97369	10.1281	10.3475	10.9341	-0.905074	3.01191e-23	4.00549e-21	20.8256	17.3373	17.7008	17.4952	3.12369	5.62973	5.1966	5.53888	-1.11869	3.88963e-15	1.41963e-13		telomerase protein component%3B telomerase associated protein;Smp_099810	Putative uncharacterized protein [Source:UniProtKB/TrEMBL;Acc:G4VGH3]	gi|21536371|ref|NP_009041.2|	telomerase protein component 1 [Homo sapiens]
SmVG_012159:Smp_176890	23.5615	29.8807	25.8714	20.7283	9.315	12.5479	9.91436	12.7624	-1.16744	5e-05	0.000268034	36.3927	30.1831	31.5658	29.6718	5.97369	10.1281	10.3475	10.9341	-0.905074	3.01191e-23	4.00549e-21	20.8256	17.3373	17.7008	17.4952	3.12369	5.62973	5.1966	5.53888	-1.11869	3.88963e-15	1.41963e-13		hypothetical protein;Smp_176890
Smp_134390	30.9973	28.1764	26.9372	27.0358	14.3756	6.50507	14.6434	14.858	-1.16722	5e-05	0.000268034	25.4308	24.8907	22.289	24.2193	5.55193	8.5223	3.76988	7.39545	-1.01212	5.3519e-06	4.18672e-05	14.9062	14.7693	12.9011	14.7662	3.09347	4.93746	2.00001	3.99862	-1.24777	5.69682e-11	9.28928e-10	GO:0005783,GO:0005789,GO:0008203,GO:0008374,GO:0016020,GO:0016021,GO:0016740,GO:0016746	sterol O-acyltransferase 1;Smp_134390	O-acyltransferase [Source:UniProtKB/TrEMBL;Acc:G4VQ11]	gi|49533617|ref|NP_003092.4|	sterol O-acyltransferase 1 [Homo sapiens]
Smp_199160	57.407	46.1831	45.4962	44.0239	12.752	28.5822	20.0461	24.612	-1.16715	5e-05	0.000268034	62.4082	73.4114	60.3325	62.9476	8.10446	17.2735	20.5791	18.6044	-1.08344	4.35523e-08	5.53412e-07	35.6812	41.7517	33.3338	36.558	4.00971	9.26191	9.84265	9.09289	-1.3697	5.47496e-12	1.13154e-10		hypothetical protein;note=predicted by EVM2;note=pfam_scan%3BPfam:PF09741.4%3B%3BE()%3D2.1E-52%3Bscore%3D177.4%3Bqu ery 2-202%3Bdescription%3DDUF2045;note=iprscan%3BInterPro:IPR019141 : Protein of unknown function DUF2045%3BPfam:PF09741%3B%3Bscore%3D1.4E-48%3Bquery 1-143%3Bdescription%3DProtein of unknown function DUF2045;Smp_199160	Putative uncharacterized protein [Source:UniProtKB/TrEMBL;Acc:G4M182]	gi|57863293|ref|NP_056079.1|	hypothetical protein LOC23313 isoform a [Homo sapiens]
Smp_199770	22.6553	46.1814	34.8341	26.3097	13.8511	12.0192	10.8972	21.1223	-1.16692	5e-05	0.000268034	37.3018	18.5231	26.7879	24.0066	5.22718	6.45039	7.01388	10.6868	-1.01137	1.30328e-06	1.17687e-05	25.0878	12.5429	18.4177	16.8194	3.06319	4.14693	3.92266	6.30353	-1.23771	2.20572e-07	1.62112e-06		schwannomin interacting protein;Smp_199770
Smp_149720	8.53551	8.7998	8.18734	8.29598	6.20446	2.09831	2.59073	4.17157	-1.16661	0.0002	0.000928806	13.3516	10.059	10.8845	11.8875	3.1739	2.03914	1.84359	3.29584	-1.13155	0.00013453	0.000726874	8.00186	5.85815	6.21918	7.21228	1.43366	1.11483	0.848017	1.7028	-1.48146	1.37702e-08	1.34519e-07		hypothetical protein;note=predicted by EVM2;Smp_149720	Putative uncharacterized protein [Source:UniProtKB/TrEMBL;Acc:G4LY17]	_	_
Smp_159000	5.1016	5.71628	6.74965	5.88957	1.92384	2.21054	2.72156	3.59552	-1.16632	5e-05	0.000268034	8.04822	7.37192	9.19027	9.78908	1.32373	3.07492	2.31631	3.36059	-0.918295	9.16325e-13	2.875e-11	4.57427	4.28189	5.10099	5.81006	0.673282	1.72863	1.2152	1.73317	-1.11189	1.72133e-09	2.05624e-08	GO:0005488,GO:0005515,GO:0031929,GO:0031931	regulatory associated protein of mTOR;Smp_159000	Putative uncharacterized protein [Source:UniProtKB/TrEMBL;Acc:G4M000]	gi|22094987|ref|NP_065812.1|	regulatory-associated protein of mTOR isoform 1 [Homo sapiens]
SmVG_001478:Smp_196220	61.9696	70.227	61.91	51.3155	26.9271	24.0863	26.7134	31.7989	-1.164	5e-05	0.000268034	79.4056	66.4053	67.9523	60.845	12.4684	19.126	16.5635	19.5653	-1.06592	6.18066e-38	2.85624e-35	46.8684	39.8929	39.6687	37.6276	6.49419	10.8337	8.32523	10.0775	-1.38664	1.46621e-26	2.56646e-24		zinc finger protein;Smp_196220	Putative zinc finger protein [Source:UniProtKB/TrEMBL;Acc:G4V5M8]	_	_
SmVG_001478:Smp_197020	61.9696	70.227	61.91	51.3155	26.9271	24.0863	26.7134	31.7989	-1.164	5e-05	0.000268034	79.4056	66.4053	67.9523	60.845	12.4684	19.126	16.5635	19.5653	-1.06592	6.18066e-38	2.85624e-35	46.8684	39.8929	39.6687	37.6276	6.49419	10.8337	8.32523	10.0775	-1.38664	1.46621e-26	2.56646e-24		nucleolar protein c7c;Smp_197020
Smp_033250	57.387	106.592	111.628	187.704	49.5083	26.088	48.0127	83.1879	-1.16377	5e-05	0.000268034	86.0358	44.173	88.608	165.033	17.7901	27.3939	12.5688	39.4742	-0.86869	0.00392138	0.0132177	51.6073	26.5543	52.1742	101.969	10.2138	16.4834	6.87719	21.6679	-1.25116	0.000621355	0.00185951	GO:0005576,GO:0006955,GO:0030246,GO:0042035	hypothetical protein;Smp_033250	Putative uncharacterized protein [Source:UniProtKB/TrEMBL;Acc:G4M0W9]	_	_
Smp_075370	52.9398	86.1604	67.2696	55.7765	31.7973	14.6662	20.6414	49.9361	-1.16336	5e-05	0.000268034	66.643	39.7417	51.4325	47.7475	11.2432	11.5627	7.09931	22.9229	-1.2125	2.32888e-06	1.9888e-05	39.1105	23.5574	29.6582	28.9923	6.06434	6.63338	3.71317	11.8832	-1.25125	2.63284e-05	0.000114745		hypothetical protein;note=predicted by EVM2;Smp_075370	Putative uncharacterized protein [Source:UniProtKB/TrEMBL;Acc:G4LX29]	_	_
Smp_194720	1.76609	1.44237	1.38314	0.979321	0.759376	0.734839	0.402217	0.593104	-1.16204	0.00015	0.000719901	3.33669	3.01714	2.60775	2.06552	0.402384	0.353057	0.620676	0.706695	-1.452	4.64294e-10	9.04099e-09	2.00746	1.81664	1.53238	1.32222	0.223726	0.241694	0.358926	0.355401	-1.67553	1.82748e-10	2.61238e-09	GO:0005737,GO:0007165	hypothetical protein;Smp_194720	Family S33 non-peptidase homologue (S33 family) [Source:UniProtKB/TrEMBL;Acc:G4VGD5]	gi|32130514|ref|NP_071922.2|	protein NDRG3 isoform b [Homo sapiens]
Smp_201700	19.0392	17.9416	15.3929	15.2341	6.01143	6.99284	7.69577	9.60286	-1.15774	0.0001	0.000501375	11.7681	13.8746	11.4432	12.5579	1.43378	3.99387	3.368	3.87333	-1.03396	2.19727e-05	0.00014669	9.97485	9.89288	8.41701	9.55736	1.71318	2.65396	2.29107	2.68264	-1.19504	9.39452e-09	9.63838e-08		hypothetical protein;Smp_201700	Putative uncharacterized protein Smp_201700 [Source:UniProtKB/TrEMBL;Acc:G4VED2]	_	_
Smp_148760	6.64968	8.37316	7.51019	7.76233	2.69235	2.58517	3.6597	4.64672	-1.15719	5e-05	0.000268034	9.47057	7.6132	8.64448	9.73418	1.73585	3.37441	2.27443	3.22229	-0.844581	2.94019e-13	1.01502e-11	5.45636	4.40223	4.85245	5.79169	0.903405	1.90369	1.11543	1.69334	-1.08387	1.74041e-12	3.89752e-11	GO:0016180,GO:0032039	integrator complex subunit 2;Smp_148760
Smp_159050	12.4659	15.5201	12.3525	11.8357	5.446	3.16817	6.60701	8.22413	-1.15404	0.00515	0.0151489	13.3559	10.4195	10.8178	11.4337	2.14162	3.8824	1.69334	4.29447	-1.12037	8.90711e-08	1.05293e-06	7.81975	6.15649	6.23065	6.90663	1.14117	2.25888	0.879062	2.25096	-1.28175	7.86977e-09	8.21972e-08	GO:0001755,GO:0004872,GO:0005515,GO:0005615,GO:0007275,GO:0016020,GO:0016021,GO:0030215,GO:0030335,GO:0045499,GO:0048843,GO:0050919,GO:0071526	semaphorin 5B;Smp_159050	Putative plexin [Source:UniProtKB/TrEMBL;Acc:G4V6Q4]	gi|91982767|ref|NP_001026872.2|	semaphorin-5B isoform 1 [Homo sapiens]
SmVG_011546:Smp_018670	12.9916	14.4763	13.558	11.0393	5.52795	6.00537	4.94658	6.9619	-1.15123	5e-05	0.000268034	13.8496	11.6244	12.5632	11.3614	2.26773	3.24384	3.21688	3.73823	-1.04784	1.13735e-30	2.83201e-28	7.93289	6.70229	7.04524	6.68755	1.16067	1.79813	1.60004	1.89849	-1.32817	8.20925e-23	9.02701e-21		tyrosine protein phosphatase non receptor type;Smp_018670	Putative 4.1 G protein [Source:UniProtKB/TrEMBL;Acc:G4VGL3]	gi|4506295|ref|NP_002821.1|	tyrosine-protein phosphatase non-receptor type 4 [Homo sapiens]
SmVG_011546:Smp_132370	12.9916	14.4763	13.558	11.0393	5.52795	6.00537	4.94658	6.9619	-1.15123	5e-05	0.000268034	13.8496	11.6244	12.5632	11.3614	2.26773	3.24384	3.21688	3.73823	-1.04784	1.13735e-30	2.83201e-28	7.93289	6.70229	7.04524	6.68755	1.16067	1.79813	1.60004	1.89849	-1.32817	8.20925e-23	9.02701e-21		tyrosine protein phosphatase non receptor type%3B protein tyrosine phosphatase non receptor type;Smp_132370	Putative uncharacterized protein [Source:UniProtKB/TrEMBL;Acc:G4VGL4]	gi|223941882|ref|NP_001138841.1|	tyrosine-protein phosphatase non-receptor type 3 isoform 3 [Homo sapiens]
SmVG_011546:Smp_132390	12.9916	14.4763	13.558	11.0393	5.52795	6.00537	4.94658	6.9619	-1.15123	5e-05	0.000268034	13.8496	11.6244	12.5632	11.3614	2.26773	3.24384	3.21688	3.73823	-1.04784	1.13735e-30	2.83201e-28	7.93289	6.70229	7.04524	6.68755	1.16067	1.79813	1.60004	1.89849	-1.32817	8.20925e-23	9.02701e-21		hypothetical protein;Smp_132390	Putative uncharacterized protein [Source:UniProtKB/TrEMBL;Acc:G4VGL5]	_	_
SmVG_029660	2.77259	5.02393	2.79283	2.74429	1.91436	1.40784	1.18757	1.49602	-1.15064	0.0023	0.00772313	4.08054	2.27089	2.36613	2.78214	0.46976	0.737179	0.610522	0.683166	-1.04517	0.00661111	0.0204196	2.6082	1.44798	1.37644	1.70074	0.341409	0.4145	0.434128	0.400218	-1.30685	0.000286823	0.000949471
Smp_028490	11.5972	13.3751	10.488	9.47334	4.25905	2.46025	6.1663	7.35718	-1.15039	5e-05	0.000268034	26.216	23.0322	19.876	20.5329	5.76917	10.3219	5.78559	9.06061	-0.736766	1.31295e-07	1.47461e-06	15.1271	13.2981	11.1315	12.254	3.03065	5.8024	2.93476	4.66971	-0.858678	5.05294e-07	3.38058e-06	GO:0003841,GO:0008152,GO:0016020,GO:0016021,GO:0016740,GO:0016746	1 acyl sn glycerol 3 phosphate acyltransferase;Smp_028490	1-acyl-sn-glycerol-3-phosphate acyltransferase epsilon [Source:UniProtKB/TrEMBL;Acc:G4LX07]	gi|61743952|ref|NP_060831.2|	1-acyl-sn-glycerol-3-phosphate acyltransferase epsilon [Homo sapiens]
SmVG_014595:Smp_210600	16.7555	19.9915	20.7219	20.3641	8.07533	6.11849	8.72471	12.4317	-1.13866	5e-05	0.000268034	16.3841	13.4304	16.5728	17.6334	2.94973	4.96356	3.25084	5.88818	-1.01155	6.78813e-26	1.16826e-23	10.01	8.10438	9.99528	11.2112	1.66221	2.9861	1.74868	3.23998	-1.24079	2.78637e-13	7.39897e-12		aspartyl aminopeptidase (M18 family);Smp_210600	Aspartyl aminopeptidase (M18 family) [Source:UniProtKB/TrEMBL;Acc:G4LVY6]	_	_
SmVG_014595:Smp_210610	16.7555	19.9915	20.7219	20.3641	8.07533	6.11849	8.72471	12.4317	-1.13866	5e-05	0.000268034	16.3841	13.4304	16.5728	17.6334	2.94973	4.96356	3.25084	5.88818	-1.01155	6.78813e-26	1.16826e-23	10.01	8.10438	9.99528	11.2112	1.66221	2.9861	1.74868	3.23998	-1.24079	2.78637e-13	7.39897e-12		aspartyl aminopeptidase;note=iprscan%3BInterPro:IPR001948 : Peptidase M18%2C aminopeptidase I%3BPRINTS:PR00932%3B%3Bscore%3D5.3E-31%3Bquery 311-329%3Bdescription%3DPeptidase M18%2C aminopeptidase I;note=iprscan%3BInterPro:IPR001948 : Peptidase M18%2C aminopeptidase I%3BPRINTS:PR00932%3B%3Bscore%3D5.3E-31%3Bquery 86-102%3Bdescription%3DPeptidase M18%2C aminopeptidase I;note=iprscan%3BInterPro:IPR0…	Putative uncharacterized protein Smp_210610 [Source:UniProtKB/TrEMBL;Acc:G4LVY7]	gi|156416028|ref|NP_036232.2|	aspartyl aminopeptidase [Homo sapiens]
Smp_171020	12.1455	14.7656	14.7442	11.1803	5.48605	4.22152	5.109	9.22032	-1.13626	5e-05	0.000268034	15.603	10.9403	13.7661	11.2966	2.1268	3.14948	2.40123	4.61799	-1.22398	4.77949e-31	1.27123e-28	9.37819	6.76874	8.34289	7.29472	1.2293	1.914	1.35796	2.62753	-1.3589	5.91276e-11	9.58671e-10	GO:0005509,GO:0016020,GO:0016021	calsyntenin;Smp_171020	Putative uncharacterized protein [Source:UniProtKB/TrEMBL;Acc:G4V5T7]	gi|209364544|ref|NP_071414.2|	calsyntenin-2 precursor [Homo sapiens]
Smp_166890	9.04305	13.9444	11.9239	8.30793	4.40436	3.3327	4.44318	7.49157	-1.13555	5e-05	0.000268034	11.4478	7.23195	9.68476	7.65154	1.59302	2.52183	1.76296	3.6792	-1.13472	9.95284e-16	5.1768e-14	6.74856	4.28903	5.60133	4.64642	0.838488	1.41668	0.891515	1.90825	-1.25939	3.10365e-07	2.19456e-06		ATPase;Smp_166890	ATPase, putative [Source:UniProtKB/TrEMBL;Acc:G4M1D0]	_	_
Smp_051930	64.0802	62.8191	58.3104	50.4795	22.5258	27.1001	27.6263	30.0303	-1.13547	5e-05	0.000268034	76.6446	74.2004	68.8759	63.0406	9.18844	20.0737	14.477	21.1666	-1.22347	5.37118e-38	2.61912e-35	47.1901	46.7164	42.4588	41.7208	5.54186	12.9565	9.13731	11.6846	-1.38731	3.66268e-18	2.09432e-16	GO:0016263,GO:0016267,GO:0016740,GO:0016757	glycoprotein N acetylgalactosamine;Smp_051930	Putative beta1,3-galactosyltransferase [Source:UniProtKB/TrEMBL;Acc:G4VI33]	gi|9910144|ref|NP_064541.1|	glycoprotein-N-acetylgalactosamine 3-beta-galactosyltransferase 1 [Homo sapiens]
Smp_131780	20.0208	21.0572	27.7758	27.3794	8.25422	12.3072	10.1284	13.1203	-1.13527	5e-05	0.000268034	17.717	16.1921	23.3681	25.0405	3.2196	6.45432	6.399	6.73155	-0.870415	5.41615e-08	6.75028e-07	9.89546	9.08854	12.8061	14.406	1.62202	3.50056	3.11503	3.33916	-1.19604	2.62179e-11	4.53368e-10	GO:0000166,GO:0003676,GO:0003723	CUG BP and ETR3 factor;Smp_131780	Bruno-like rna binding protein [Source:UniProtKB/TrEMBL;Acc:G4LW65]	_	_
SmVG_015507:Smp_052250	11.6026	16.4454	13.6773	10.4594	7.46238	4.01173	4.80612	7.4953	-1.13415	0.0001	0.000501375	16.5208	11.4679	13.4934	11.274	3.23095	3.69311	2.49904	4.64337	-1.04722	1.36456e-08	1.9171e-07	9.4791	6.54386	7.54299	6.61457	1.58818	2.01163	1.1946	2.29697	-1.24194	5.79708e-10	7.64947e-09		Ras associated and pleckstrin y;Smp_052250	Putative growth factor receptor-bound protein [Source:UniProtKB/TrEMBL;Acc:G4VHZ9]	gi|47132519|ref|NP_998754.1|	ras-associated and pleckstrin homology domains-containing protein 1 isoform 1 [Homo sapiens]
SmVG_015507:Smp_150170	11.6026	16.4454	13.6773	10.4594	7.46238	4.01173	4.80612	7.4953	-1.13415	0.0001	0.000501375	16.5208	11.4679	13.4934	11.274	3.23095	3.69311	2.49904	4.64337	-1.04722	1.36456e-08	1.9171e-07	9.4791	6.54386	7.54299	6.61457	1.58818	2.01163	1.1946	2.29697	-1.24194	5.79708e-10	7.64947e-09		Ras associated and pleckstrin y;Smp_150170	Putative uncharacterized protein [Source:UniProtKB/TrEMBL;Acc:G4VHZ8]	_	_
SmVG_023251:Smp_007700	4.48142	4.36747	5.25513	4.7338	1.48614	1.94321	2.27012	2.889	-1.13316	5e-05	0.000268034	4.08093	3.94916	4.67312	4.76783	0.624822	1.30705	1.06896	1.35785	-1.05069	1.80293e-17	1.16573e-15	2.34289	2.33021	2.63403	2.85867	0.342278	0.865954	0.638047	0.814411	-1.15692	4.77276e-11	7.91798e-10		rapamycin insensitive companion of mTOR;Smp_007700	Putative ring finger protein [Source:UniProtKB/TrEMBL;Acc:G4VPY8]	_	_
SmVG_023251:Smp_007710	4.48142	4.36747	5.25513	4.7338	1.48614	1.94321	2.27012	2.889	-1.13316	5e-05	0.000268034	4.08093	3.94916	4.67312	4.76783	0.624822	1.30705	1.06896	1.35785	-1.05069	1.80293e-17	1.16573e-15	2.34289	2.33021	2.63403	2.85867	0.342278	0.865954	0.638047	0.814411	-1.15692	4.77276e-11	7.91798e-10		rapamycin insensitive companion of mTOR;note=predicted by EVM2;Smp_007710	Putative uncharacterized protein [Source:UniProtKB/TrEMBL;Acc:G4VPY7]	_	_
SmVG_033761:Smp_139280	3.72111	5.0606	3.80503	2.95216	2.18908	1.06379	1.62093	2.21159	-1.13297	0.0001	0.000501375	4.10517	2.92647	3.32259	2.46466	0.571442	0.930279	0.531735	1.02408	-1.20102	1.07267e-08	1.54219e-07	2.47279	1.75703	1.99915	1.54277	0.472588	0.573706	0.292323	0.623879	-1.20651	5.23445e-06	2.7259e-05		hypothetical protein;Smp_139280	Putative uncharacterized protein [Source:UniProtKB/TrEMBL;Acc:G4M1F6]	_	_
SmVG_033761:Smp_175730	3.72111	5.0606	3.80503	2.95216	2.18908	1.06379	1.62093	2.21159	-1.13297	0.0001	0.000501375	4.10517	2.92647	3.32259	2.46466	0.571442	0.930279	0.531735	1.02408	-1.20102	1.07267e-08	1.54219e-07	2.47279	1.75703	1.99915	1.54277	0.472588	0.573706	0.292323	0.623879	-1.20651	5.23445e-06	2.7259e-05		hypothetical protein;Smp_175730	Putative uncharacterized protein [Source:UniProtKB/TrEMBL;Acc:G4M1F4]	_	_
Smp_194610	3.59392	4.71664	4.11669	2.87072	1.59109	1.87435	1.57734	1.95276	-1.12883	0.0028	0.00911197	3.99485	2.88597	3.28265	2.65797	0.596135	1.08245	1.02805	1.07298	-0.910676	1.16951e-09	2.07061e-08	2.56599	1.83145	2.04049	1.73801	0.347062	0.605026	0.595506	0.591803	-1.12998	1.95971e-08	1.83098e-07	GO:0000166,GO:0004672,GO:0004674,GO:0004691,GO:0005524,GO:0006468,GO:0016301,GO:0016310,GO:0016740,GO:0016772	cAMP dependent protein kinase catalytic subunit;Smp_194610	Serine/threonine kinase [Source:UniProtKB/TrEMBL;Acc:G4LZA5]	gi|4826948|ref|NP_005035.1|	serine/threonine-protein kinase PRKX [Homo sapiens]
Smp_064200	6.96543	8.70325	7.97716	7.01424	2.97759	3.12241	3.6423	4.28171	-1.12846	5e-05	0.000268034	9.41869	7.33086	8.01715	8.68626	1.44811	2.79634	1.83921	3.14921	-0.994222	2.34212e-12	6.78461e-11	5.77948	4.46813	4.76252	5.44004	0.821713	1.62022	0.953528	1.62015	-1.22007	2.2223e-11	3.88993e-10		ocrl type II inositol 5 phosphatase;note=predicted by EVM2;Smp_064200	Putative uncharacterized protein [Source:UniProtKB/TrEMBL;Acc:G4V759]	_	_
Smp_181160	3.56688	3.92095	2.50011	2.87656	0.851318	2.12801	1.42305	1.48933	-1.12664	5e-05	0.000268034	3.95565	3.45188	2.5803	3.07394	0.341606	0.998591	1.25635	0.920286	-1.02694	0.00112988	0.0045929	2.27636	2.006	1.45304	1.83151	0.171381	0.573114	0.650895	0.474405	-1.25614	7.89656e-06	3.97703e-05	GO:0004835,GO:0006464,GO:0016874,GO:0018095	tubulin polyglutamylase ttll4;Smp_181160	Tubulin tyrosine ligase-related [Source:UniProtKB/TrEMBL;Acc:G4VAE4]	gi|217330594|ref|NP_055455.3|	tubulin polyglutamylase TTLL4 [Homo sapiens]
Smp_123350	3.3202	2.27024	2.20473	1.94898	1.11659	0.396631	1.3448	1.61176	-1.12433	0.00225	0.00758433	2.15318	2.82977	2.24959	2.10322	0.600085	0.805319	0.358364	0.909624	-0.98872	0.000854932	0.00361201	1.36234	1.81415	1.34819	1.32706	0.371878	0.541048	0.235077	0.591094	-0.955957	0.000881141	0.00252845	GO:0004930,GO:0005887,GO:0007186,GO:0007200,GO:0007218,GO:0008528,GO:0016020,GO:0016021	galanin receptor type 2;Smp_123350	Putative g-protein coupled receptor [Source:UniProtKB/TrEMBL;Acc:G4VBL0]	_	_
Smp_164140	219.642	206.21	204.8	230.85	92.8941	85.5228	120.64	97.4135	-1.11964	5e-05	0.000268034	194.669	203.221	189.352	236.227	80.4678	94.4911	51.9409	80.9895	-0.499762	0.0148351	0.0401052	196.885	186.262	179.681	224.319	62.8257	79.6419	44.71	66.3296	-0.742426	2.62656e-05	0.00011453	GO:0016020,GO:0016021	opsin receptor;Smp_164140	Putative opsin-like receptor [Source:UniProtKB/TrEMBL;Acc:G4VL84]	_	_
SmVG_032736:Smp_039130	82.0492	75.8254	79.4697	89.6566	27.7486	30.5482	41.0954	51.1318	-1.1193	5e-05	0.000268034	88.0128	94.0925	91.9791	115.353	17.3806	38.1947	25.7418	39.469	-0.829732	7.06082e-17	4.17337e-15	51.3241	54.9964	52.4434	69.2792	9.05146	21.4473	12.8896	20.2055	-1.05718	1.05332e-09	1.30743e-08		Niemann Pick C1 protein;Smp_039130	Niemann-pick C1 (NPC1) [Source:UniProtKB/TrEMBL;Acc:G4M0J8]	gi|255652944|ref|NP_000262.2|	Niemann-Pick C1 protein precursor [Homo sapiens]
SmVG_032736:Smp_177270	82.0492	75.8254	79.4697	89.6566	27.7486	30.5482	41.0954	51.1318	-1.1193	5e-05	0.000268034	88.0128	94.0925	91.9791	115.353	17.3806	38.1947	25.7418	39.469	-0.829732	7.06082e-17	4.17337e-15	51.3241	54.9964	52.4434	69.2792	9.05146	21.4473	12.8896	20.2055	-1.05718	1.05332e-09	1.30743e-08		Niemann Pick C1 protein;Smp_177270	Putative uncharacterized protein [Source:UniProtKB/TrEMBL;Acc:G4M0J9]	_	_
SmVG_032736:Smp_188720	82.0492	75.8254	79.4697	89.6566	27.7486	30.5482	41.0954	51.1318	-1.1193	5e-05	0.000268034	88.0128	94.0925	91.9791	115.353	17.3806	38.1947	25.7418	39.469	-0.829732	7.06082e-17	4.17337e-15	51.3241	54.9964	52.4434	69.2792	9.05146	21.4473	12.8896	20.2055	-1.05718	1.05332e-09	1.30743e-08		Niemann Pick C1 protein;Smp_188720	Putative uncharacterized protein [Source:UniProtKB/TrEMBL;Acc:G4M0K1]	gi|255652944|ref|NP_000262.2|	Niemann-Pick C1 protein precursor [Homo sapiens]
SmVG_032736:Smp_188730	82.0492	75.8254	79.4697	89.6566	27.7486	30.5482	41.0954	51.1318	-1.1193	5e-05	0.000268034	88.0128	94.0925	91.9791	115.353	17.3806	38.1947	25.7418	39.469	-0.829732	7.06082e-17	4.17337e-15	51.3241	54.9964	52.4434	69.2792	9.05146	21.4473	12.8896	20.2055	-1.05718	1.05332e-09	1.30743e-08		Niemann Pick C1 protein;Smp_188730	Putative uncharacterized protein [Source:UniProtKB/TrEMBL;Acc:G4M0K0]	_	_
Smp_144510	3.39833	7.4897	4.49194	3.17829	2.30896	1.57255	1.8489	2.81428	-1.11896	5e-05	0.000268034	6.03308	2.53849	3.50492	2.83543	0.863422	1.08571	0.787097	1.39496	-0.982869	0.00019642	0.00101578	3.50423	1.49079	1.9965	1.70807	0.462893	0.623391	0.406439	0.723547	-1.1683	0.000175637	0.000609896		hypothetical protein;Smp_144510	Putative uncharacterized protein [Source:UniProtKB/TrEMBL;Acc:G4V7K3]	_	_
Smp_194650	7.40179	9.35868	8.94308	7.67766	3.49211	3.63223	3.5655	4.68622	-1.11835	5e-05	0.000268034	8.93396	6.61022	8.03294	7.61674	1.38531	2.28208	2.10367	2.48743	-0.987648	1.24606e-22	1.44383e-20	5.11609	3.76135	4.48086	4.45238	0.707446	1.24698	1.04447	1.23518	-1.25589	8.29226e-19	5.08019e-17	GO:0005515	hypothetical protein;Smp_194650	Putative uncharacterized protein [Source:UniProtKB/TrEMBL;Acc:G4VGE6]	_	_
Smp_094710	3.18416	2.47468	4.00229	3.41473	1.16416	1.56956	0.99089	2.31046	-1.11546	5e-05	0.000268034	5.09032	6.57345	8.07902	6.58649	1.06627	1.90198	1.71762	2.68941	-1.01146	2.97504e-11	7.12275e-10	2.79558	3.56105	4.34835	3.64608	0.482321	0.945956	0.722931	1.22455	-1.20566	2.28762e-07	1.67414e-06	GO:0016020,GO:0016021	alstrom syndrome protein;note=predicted by EVM2;note=tmhmm%3B%3Bquery 1-1276%3B;note=%3Bquery 1-12%3B;note=%3Bquery 1073-1276%3B;note=%3Bquery 13-35%3B;note=%3Bquery 1050-1072%3B;note=%3Bquery 36-1049%3B;Smp_094710	Putative alstrom syndrome protein [Source:UniProtKB/TrEMBL;Acc:G4V9M6]	_	_
SmVG_011237:Smp_013970	8.19289	11.0362	14.219	13.6885	3.39357	6.25541	6.1824	5.98644	-1.11134	5e-05	0.000268034	10.9525	7.60999	13.4804	14.6132	1.69446	4.42506	3.88567	3.41989	-0.781568	0.000986578	0.00408561	6.30473	4.40851	7.61858	8.69096	0.888329	2.47882	1.96301	1.75985	-1.15864	8.90093e-08	7.15495e-07		hypothetical protein;note=predicted by EVM2;Smp_013970	Putative uncharacterized protein [Source:UniProtKB/TrEMBL;Acc:G4LVI6]	_	_
SmVG_011237:Smp_129710	8.19289	11.0362	14.219	13.6885	3.39357	6.25541	6.1824	5.98644	-1.11134	5e-05	0.000268034	10.9525	7.60999	13.4804	14.6132	1.69446	4.42506	3.88567	3.41989	-0.781568	0.000986578	0.00408561	6.30473	4.40851	7.61858	8.69096	0.888329	2.47882	1.96301	1.75985	-1.15864	8.90093e-08	7.15495e-07		Uveal autoantigen with coiled coil domains;Smp_129710	Uveal autoantigen with coiled-coil domains and ankyrin repeats protein, putative [Source:UniProtKB/TrEMBL;Acc:G4LVI7]	gi|59850762|ref|NP_060473.2|	uveal autoantigen with coiled-coil domains and ankyrin repeats isoform 1 [Homo sapiens]
Smp_008620	6.73703	7.19409	7.25445	5.63222	2.95572	3.63288	2.56661	3.26675	-1.1103	5e-05	0.000268034	6.93399	6.47623	6.75804	5.86645	1.20922	1.76579	2.14384	1.84922	-0.962359	1.29695e-17	8.57526e-16	3.8457	3.61764	3.617	3.39003	0.583208	1.00865	1.05775	0.871751	-1.2086	1.02804e-14	3.41765e-13	GO:0004252,GO:0005789,GO:0006508,GO:0008233,GO:0016020,GO:0016021,GO:0016485,GO:0016787,GO:0042058,GO:0050708	inactive rhomboid protein 1;Smp_008620	RHBDF1 protein (S54 family) [Source:UniProtKB/TrEMBL;Acc:G4LWH6]	gi|190341097|ref|NP_071895.3|	inactive rhomboid protein 1 [Homo sapiens]
Smp_206070	17.213	21.9955	22.2143	22.0987	5.42014	12.003	10.4534	10.8431	-1.10908	5e-05	0.000268034	13.2679	10.7509	14.2019	13.5359	1.12271	4.5634	4.87688	4.40529	-0.979539	0.00636914	0.0198082	12.593	9.73377	12.6158	14.2307	1.2503	4.25176	3.48985	3.34129	-1.17142	6.10838e-07	4.01468e-06	GO:0004672,GO:0004674,GO:0005524,GO:0006468,GO:0016020,GO:0016021,GO:0016772	dual specificity;note=iprscan%3BInterPro:IPR017442 : Serine/threonine protein kinase-related%3BPfam:PF00069%3B%3Bscore%3D1.8E-36%3Bquery 25-231%3Bdescription%3DSerine/threonine protein kinase-related;Smp_206070
Smp_123830	13.101	18.3819	22.5686	18.2046	7.89338	6.30906	6.16737	13.1542	-1.10792	5e-05	0.000268034	22.7963	14.8066	26.0138	22.2965	4.64134	5.35427	4.65314	9.93007	-1.00692	1.91581e-07	2.06262e-06	11.7147	7.77258	13.0181	12.0735	2.1623	2.71935	2.09947	4.40575	-1.12169	5.68838e-06	2.93734e-05	GO:0005201,GO:0005578,GO:0005581	collagen alpha (xi) chain;Smp_123830	Putative collagen alpha-1(V) chain [Source:UniProtKB/TrEMBL;Acc:G4V6X6]	gi|111118970|ref|NP_542411.2|	collagen alpha-2(XI) chain isoform 1 preproprotein [Homo sapiens]
Smp_131420	8.5995	11.0122	9.90548	9.13116	2.90634	4.30762	4.20719	6.55003	-1.10472	5e-05	0.000268034	9.1361	6.12046	7.67538	7.88356	1.07791	2.38987	2.03372	3.02764	-1.0156	8.601e-08	1.01983e-06	5.93152	3.88583	4.81723	5.03051	0.566109	1.35283	1.14451	1.60553	-1.25593	1.17146e-07	9.14252e-07	GO:0016020,GO:0016021	testis specific protein pbs13;note=predicted by EVM2;note=pfam_scan%3BPfam:PF05794.8%3B%3BE()%3D1.2E-70%3Bscore%3D238.2%3Bqu ery 74-475%3Bdescription%3DTcp11;note=iprscan%3BInterPro:IPR008862 : T-complex 11%3BPfam:PF05794%3B%3Bscore%3D1.9E-49%3Bquery 73-522%3Bdescription%3DT-complex 11;note=tmhmm%3B%3Bquery 1-523%3B;note=%3Bquery 382-523%3B;note=%3Bquery 359-381%3B;note=%3Bquery 1-358%3B;Smp_1314…
SmVG_028693	58.4977	84.9014	59.0055	56.5504	24.5371	28.282	27.5169	40.0918	-1.10453	5e-05	0.000268034	62.3232	38.0982	39.1369	39.5586	9.80739	16.8667	10.9569	19.0743	-0.808198	0.000172151	0.000902636	77.7886	46.8258	55.0256	50.4256	11.6032	18.8712	12.4008	19.2892	-0.96789	2.39239e-05	0.00010588
Smp_138290	10.9845	14.7985	10.8224	9.3216	4.94538	3.17995	5.17673	8.07563	-1.10324	5e-05	0.000268034	12.4144	8.60082	8.74213	8.43567	1.96516	3.31487	1.83629	3.90647	-1.01499	1.71357e-09	2.92997e-08	7.27539	5.04989	5.01479	5.07999	1.07066	1.8192	0.877207	2.03181	-1.16341	2.86721e-07	2.04084e-06	GO:0005875,GO:0007017,GO:0030286	hypothetical protein;note=predicted by EVM2;note=pfam_scan%3BPfam:PF01221.13%3B%3BE()%3D1.2E-6%3Bscore%3D28.3%3Bque ry 465-515%3Bdescription%3DDynein_light;Smp_138290	Putative uncharacterized protein [Source:UniProtKB/TrEMBL;Acc:G4VFH9]	_	_
Smp_181050	89.0746	97.916	98.6675	86.8136	36.9775	41.5103	41.0775	53.8781	-1.10267	5e-05	0.000268034	95.3417	81.5123	92.7159	89.9842	16.2082	28.1211	23.8977	32.5523	-0.960436	2.78604e-30	6.65409e-28	54.1509	46.2843	51.5353	52.4019	8.13375	15.3446	11.6335	16.2409	-1.17919	4.33301e-16	1.84897e-14	GO:0007018,GO:0016020,GO:0016021,GO:0019894	hypothetical protein;Smp_181050	Putative uncharacterized protein [Source:UniProtKB/TrEMBL;Acc:G4V5E4]	_	_
Smp_173380	5.32477	7.16419	6.66139	4.40339	2.7154	2.29322	2.44476	3.52162	-1.10173	5e-05	0.000268034	5.51274	4.00771	5.07826	3.22946	0.847522	1.3656	0.776974	1.50217	-1.17122	1.71879e-14	7.31453e-13	3.11688	2.28142	2.838	2.19496	0.508917	0.771013	0.552789	0.830213	-1.17107	2.25533e-09	2.64262e-08	GO:0004672,GO:0004713,GO:0004714,GO:0005515,GO:0005524,GO:0006468,GO:0007169,GO:0016020,GO:0016021,GO:0016301,GO:0016310,GO:0016772,GO:0018108	tyrosine kinase;Smp_173380	Tyrosine kinase [Source:UniProtKB/TrEMBL;Acc:G4VAY0]	gi|15826840|ref|NP_002812.2|	inactive tyrosine-protein kinase 7 isoform a precursor [Homo sapiens]
SmVG_030139:Smp_166610	5.0328	5.53687	5.25148	4.41293	2.28383	2.7581	1.64247	2.77732	-1.09661	0.0001	0.000501375	6.14192	4.95353	5.69009	5.4403	1.10759	1.42513	1.88985	1.78962	-0.913412	1.20312e-09	2.12369e-08	3.47665	2.81718	3.16012	3.19654	0.575861	0.80284	0.95994	0.899795	-1.16294	4.64952e-10	6.24084e-09		hypothetical protein;Smp_166610	Putative uncharacterized protein [Source:UniProtKB/TrEMBL;Acc:C4QJB7]	_	_
SmVG_030139:Smp_166620	5.0328	5.53687	5.25148	4.41293	2.28383	2.7581	1.64247	2.77732	-1.09661	0.0001	0.000501375	6.14192	4.95353	5.69009	5.4403	1.10759	1.42513	1.88985	1.78962	-0.913412	1.20312e-09	2.12369e-08	3.47665	2.81718	3.16012	3.19654	0.575861	0.80284	0.95994	0.899795	-1.16294	4.64952e-10	6.24084e-09		calcium activated potassium channel;Smp_166620	Calcium-activated potassium channel [Source:UniProtKB/TrEMBL;Acc:C4QJB8]	gi|238624132|ref|NP_001154825.1|	calcium-activated potassium channel subunit alpha-1 isoform d [Homo sapiens]
SmVG_030139:Smp_166630	5.0328	5.53687	5.25148	4.41293	2.28383	2.7581	1.64247	2.77732	-1.09661	0.0001	0.000501375	6.14192	4.95353	5.69009	5.4403	1.10759	1.42513	1.88985	1.78962	-0.913412	1.20312e-09	2.12369e-08	3.47665	2.81718	3.16012	3.19654	0.575861	0.80284	0.95994	0.899795	-1.16294	4.64952e-10	6.24084e-09		calcium activated potassium channel subunit;Smp_166630	Putative uncharacterized protein [Source:UniProtKB/TrEMBL;Acc:C4QJB9]	_	_
Smp_174190	1.51234	1.18396	1.68287	1.36204	0.486551	0.831548	0.669143	0.701617	-1.09436	0.0018	0.00624542	1.83517	1.71265	2.09286	1.75808	0.376961	0.548178	0.786424	0.729294	-0.784242	0.000942444	0.00392506	1.12026	1.04259	1.22831	1.11204	0.205417	0.320447	0.414401	0.393884	-0.974233	7.58055e-05	0.000291824	GO:0005887,GO:0007166,GO:0016020,GO:0016021	Tetraspanin 18 (Tspan 18);Smp_174190	Tetraspanin, putative [Source:UniProtKB/TrEMBL;Acc:G4LZV5]	_	_
SmVG_023745	16.2689	23.0535	17.8781	12.4634	8.02589	8.79723	5.52846	10.2808	-1.09411	5e-05	0.000268034	20.8441	12.5388	15.6438	12.2668	3.0437	4.24168	4.28276	5.94293	-0.95449	5.39531e-06	4.21068e-05	12.9751	8.22902	9.04497	7.49115	1.70103	2.25835	2.3017	2.9392	-1.16473	8.63557e-06	4.30124e-05	GO:0004719,GO:0006464
SmVG_028751:Smp_163500	3.57669	3.70379	3.33037	3.50112	1.3973	1.61738	1.99702	1.61069	-1.0915	0.0009	0.00344646	3.41162	3.14209	3.10694	3.46264	0.589997	1.31482	0.971089	0.934562	-0.828445	2.31755e-11	5.68601e-10	1.982	1.84599	1.76911	2.07621	0.309753	0.753818	0.490171	0.478146	-1.14737	1.79506e-14	5.72349e-13		Protein Sprint;Smp_163500	Putative uncharacterized protein [Source:UniProtKB/TrEMBL;Acc:G4LXD9]	_	_
SmVG_028751:Smp_163510	3.57669	3.70379	3.33037	3.50112	1.3973	1.61738	1.99702	1.61069	-1.0915	0.0009	0.00344646	3.41162	3.14209	3.10694	3.46264	0.589997	1.31482	0.971089	0.934562	-0.828445	2.31755e-11	5.68601e-10	1.982	1.84599	1.76911	2.07621	0.309753	0.753818	0.490171	0.478146	-1.14737	1.79506e-14	5.72349e-13		Protein Sprint;note=predicted by EVM2;Smp_163510	Putative uncharacterized protein [Source:UniProtKB/TrEMBL;Acc:G4LXE0]	_	_
SmVG_028751:Smp_163530	3.57669	3.70379	3.33037	3.50112	1.3973	1.61738	1.99702	1.61069	-1.0915	0.0009	0.00344646	3.41162	3.14209	3.10694	3.46264	0.589997	1.31482	0.971089	0.934562	-0.828445	2.31755e-11	5.68601e-10	1.982	1.84599	1.76911	2.07621	0.309753	0.753818	0.490171	0.478146	-1.14737	1.79506e-14	5.72349e-13		hypothetical protein;Smp_163530	Putative uncharacterized protein [Source:UniProtKB/TrEMBL;Acc:G4LXE2]	_	_
Smp_139030	22.8784	20.7346	20.9022	20.3764	6.3982	11.3679	9.29122	12.8099	-1.09042	0.0005	0.00207048	21.8538	21.3626	21.3684	22.3591	2.94585	6.53058	6.75063	7.6083	-1.00856	1.34604e-10	2.9064e-09	12.2297	12.1093	11.7689	13.1314	1.49803	3.60559	3.29048	3.77688	-1.20993	1.92563e-11	3.42657e-10		protein FAM172A;Smp_139030	Putative uncharacterized protein [Source:UniProtKB/TrEMBL;Acc:G4VPK5]	_	_
Smp_145840	4.28344	4.42025	3.85968	3.65034	1.40156	1.91017	1.90024	2.40441	-1.09004	5e-05	0.000268034	5.2317	4.72461	4.19083	4.45328	0.746824	1.7203	1.5674	1.74131	-0.871816	1.20303e-07	1.36955e-06	2.96812	2.56629	2.31011	2.5898	0.348604	0.96739	0.696048	0.876025	-1.03336	6.59542e-07	4.31495e-06	GO:0005515	WD repeat containing protein 42A;Smp_145840	Putative wd-repeat protein [Source:UniProtKB/TrEMBL;Acc:G4VD42]	gi|30089954|ref|NP_056541.2|	DDB1- and CUL4-associated factor 8 [Homo sapiens]
Smp_164040	21.2061	22.7199	23.2637	23.6046	10.3465	11.7511	12.5225	8.09662	-1.0878	5e-05	0.000268034	21.6917	18.7959	21.1515	24.5334	4.41717	8.15127	7.46722	4.9161	-0.700453	9.52801e-07	8.84269e-06	12.897	11.3132	12.4479	15.1475	2.4859	4.85717	4.11851	2.70727	-1.1017	3.01156e-10	4.13945e-09		hypothetical protein;Smp_164040	Putative uncharacterized protein [Source:UniProtKB/TrEMBL;Acc:G4VL60]	_	_
Smp_214120	10.5381	14.2053	12.0555	10.942	5.32367	4.9823	6.5445	5.62393	-1.08695	5e-05	0.000268034	13.7677	10.7461	12.1195	13.4127	2.58168	4.73709	3.33996	3.78533	-0.811356	2.18847e-07	2.322e-06	7.85273	6.23638	6.80874	7.93994	1.33131	2.62991	1.68149	1.90453	-1.09783	7.34761e-12	1.45208e-10	GO:0008168	methyltransferase nsun4;Smp_214120
SmVG_019873:Smp_123650	4.6559	5.50034	5.64022	4.0567	1.83328	2.61811	1.81177	3.08626	-1.08642	5e-05	0.000268034	5.27486	4.13956	5.09937	4.0417	0.742463	1.18947	1.4721	1.59571	-1.0464	1.10388e-12	3.41766e-11	3.04238	2.40579	2.90317	2.42038	0.413747	0.673391	0.753531	0.83755	-1.22852	1.41671e-09	1.73093e-08		peroxidasin;Smp_123650	Putative peroxidasin [Source:UniProtKB/TrEMBL;Acc:G4VLK0]	gi|332078492|ref|NP_001193674.1|	thyroid peroxidase isoform b precursor [Homo sapiens]
SmVG_019873:Smp_123660	4.6559	5.50034	5.64022	4.0567	1.83328	2.61811	1.81177	3.08626	-1.08642	5e-05	0.000268034	5.27486	4.13956	5.09937	4.0417	0.742463	1.18947	1.4721	1.59571	-1.0464	1.10388e-12	3.41766e-11	3.04238	2.40579	2.90317	2.42038	0.413747	0.673391	0.753531	0.83755	-1.22852	1.41671e-09	1.73093e-08		peroxidasin;note=pfam_scan%3BPfam:PF03098.10%3B%3BE()%3D1.3E-16%3Bscore%3D59.9%3Bqu ery 1380-1446%3Bdescription%3DAn_peroxidase;note=pfam_scan%3BPfam:PF13855.1%3B%3BE()%3D8.7E-10%3Bscore%3D38.1%3Bque ry 797-854%3Bdescription%3DLRR_8;note=pfam_scan%3BPfam:PF07679.11%3B%3BE()%3D1.0E-5%3Bscore%3D25.1%3Bque ry 1085-1200%3Bdescription%3DI-set;note=pfam_scan%3BPfam:PF07679.11%3B%3BE()%3D2.6E-5%3Bscore%…	Putative peroxidasin [Source:UniProtKB/TrEMBL;Acc:G4VLJ9]	gi|109150416|ref|NP_036425.1|	peroxidasin homolog precursor [Homo sapiens]
SmVG_022322:Smp_057410	31.3705	46.4412	24.4878	24.6092	13.2589	14.6948	10.9374	20.9182	-1.08535	5e-05	0.000268034	59.1395	40.027	30.6168	35.3409	7.66339	10.0301	10.8264	16.2465	-1.05005	1.08834e-07	1.2524e-06	34.6176	23.5019	17.4777	21.16	4.00105	5.65399	5.46297	8.3297	-1.20781	3.72057e-07	2.58392e-06		rab effector MyRIP;Smp_057410	Putative uncharacterized protein [Source:UniProtKB/TrEMBL;Acc:G4VMW3]	gi|59853352|ref|NP_056275.2|	rab effector MyRIP [Homo sapiens]
SmVG_022322:Smp_152960	31.3705	46.4412	24.4878	24.6092	13.2589	14.6948	10.9374	20.9182	-1.08535	5e-05	0.000268034	59.1395	40.027	30.6168	35.3409	7.66339	10.0301	10.8264	16.2465	-1.05005	1.08834e-07	1.2524e-06	34.6176	23.5019	17.4777	21.16	4.00105	5.65399	5.46297	8.3297	-1.20781	3.72057e-07	2.58392e-06		rab effector MyRIP;note=pfam_scan%3BPfam:PF13895.1%3B%3BE()%3D1.5E-18%3Bscore%3D66.5%3Bque ry 89-211%3Bdescription%3DIg_2;Smp_152960	Putative uncharacterized protein [Source:UniProtKB/TrEMBL;Acc:G4VMW2]	_	_
SmVG_022322:Smp_152970	31.3705	46.4412	24.4878	24.6092	13.2589	14.6948	10.9374	20.9182	-1.08535	5e-05	0.000268034	59.1395	40.027	30.6168	35.3409	7.66339	10.0301	10.8264	16.2465	-1.05005	1.08834e-07	1.2524e-06	34.6176	23.5019	17.4777	21.16	4.00105	5.65399	5.46297	8.3297	-1.20781	3.72057e-07	2.58392e-06		hypothetical protein;Smp_152970	Putative uncharacterized protein [Source:UniProtKB/TrEMBL;Acc:G4VMW1]	_	_
Smp_129260	37.8074	45.536	41.9177	42.7135	16.4278	15.6513	23.4057	23.9388	-1.0806	5e-05	0.000268034	48.0045	37.7484	43.1171	48.1816	8.94581	18.6416	10.4994	15.2842	-0.827292	2.38729e-10	4.88435e-09	27.1137	21.233	23.7688	27.7942	4.40629	10.0484	4.99493	7.57857	-1.07474	3.75839e-13	9.70956e-12	GO:0003677,GO:0003910,GO:0003950,GO:0005634,GO:0005737,GO:0006273,GO:0006471,GO:0008270,GO:0016740,GO:0016757,GO:0051103,GO:0051287	poly (ADP ribose) polymerase;Smp_129260
Smp_124950	4.07298	4.89334	4.73473	3.8404	1.83388	2.22045	1.94585	2.32609	-1.07503	0.0001	0.000501375	5.3337	4.3596	4.66265	4.46663	1.00134	1.74737	1.36135	1.8026	-0.828541	2.87322e-06	2.40697e-05	3.25884	2.67553	2.76718	2.90774	0.583106	1.04237	0.707349	0.967073	-1.01022	2.17989e-08	2.01911e-07	GO:0005515	SET and MYND domain containing protein 4;Smp_124950	Set and mynd domain containing, putative [Source:UniProtKB/TrEMBL;Acc:G4LZ26]	gi|156616308|ref|NP_443160.2|	SET and MYND domain-containing protein 4 [Homo sapiens]
Smp_015020	8.43258	14.5831	13.9757	7.9957	5.2053	3.74648	4.97747	7.49726	-1.07012	5e-05	0.000268034	14.3078	8.10036	13.0618	8.23769	2.67975	3.87187	2.80865	4.42918	-0.876985	1.26967e-06	1.15097e-05	8.1073	4.63735	7.27161	4.83825	1.36746	2.13839	1.39399	2.23186	-1.00264	1.20655e-05	5.78779e-05	GO:0000166,GO:0005391,GO:0005524,GO:0005887,GO:0006754,GO:0006810,GO:0006811,GO:0006812,GO:0006813,GO:0006814,GO:0006883,GO:0010107,GO:0010248,GO:0015077,GO:0015672,GO:0015991,GO:0016020,GO:0016021,GO:0016787,GO:0016820,GO:0019829,GO:0030007,GO:0036376,GO:0043231,GO:0046872	sodium potassium transporting ATPase alpha subunit;Smp_015020	Sodium potassium transporting ATPase alpha subunit [Source:UniProtKB/TrEMBL;Acc:G4VGA5]	gi|28373113|ref|NP_777617.1|	sarcoplasmic/endoplasmic reticulum calcium ATPase 3 isoform f [Homo sapiens]
Smp_151400	2.04783	4.31507	4.10971	2.61016	1.51351	0.640978	1.29579	2.78094	-1.07008	0.00245	0.00816107	3.77816	1.7128	2.89824	2.47476	0.873979	0.863904	0.452846	1.39043	-0.863693	0.011854	0.0331884	2.62732	1.15417	2.0508	1.57665	0.5332	0.519837	0.24821	0.864368	-0.931974	0.0142726	0.0286822	GO:0005102,GO:0005576,GO:0005578,GO:0007275,GO:0016055	WNT;Smp_151400
Smp_144450	13.0081	16.1956	13.1537	11.7441	5.97842	5.70085	5.7882	8.32376	-1.06879	5e-05	0.000268034	13.5	10.5954	10.814	10.5983	2.34582	3.48928	2.99575	4.10876	-0.943943	2.6307e-18	1.86588e-16	7.59165	5.92852	5.93111	6.02036	1.21628	1.86906	1.38095	2.03285	-1.17493	1.32988e-13	3.67947e-12	GO:0000166,GO:0003676	apobec 1 complementation factor;Smp_144450	Apobec-1 complementation factor-related [Source:UniProtKB/TrEMBL;Acc:G4M1J4]	gi|21450675|ref|NP_659416.1|	probable RNA-binding protein 46 [Homo sapiens]
Smp_198650	3.0311	6.40296	6.24699	3.79618	2.91408	2.002	2.26606	2.11126	-1.06751	5e-05	0.000268034	9.56347	4.89248	8.54332	6.03161	1.81284	2.68475	1.90855	2.14225	-0.804226	0.000115123	0.000636947	5.61839	2.74655	4.79199	3.64885	0.912217	1.47456	0.964052	1.02228	-1.09762	1.36293e-05	6.4407e-05	GO:0005515,GO:0005737,GO:0008093,GO:0016020,GO:0016021,GO:0030507,GO:0072661	ankyrin :unc;Smp_198650
Smp_160210	3.0433	2.5502	2.27631	1.96694	0.546732	0.938786	1.41554	1.79601	-1.06642	0.00035	0.00152055	2.28865	2.60849	1.9163	1.96731	0.239319	1.19024	0.710753	0.868094	-0.894834	0.00924421	0.0270057	1.26212	1.42959	1.056	1.09988	0.124382	0.653688	0.355687	0.440093	-0.857213	0.00312412	0.00764933	GO:0006679,GO:0008120,GO:0016020,GO:0016021,GO:0016740,GO:0016757	ceramide glucosyltransferase;Smp_160210	Putative ceramide glucosyltransferase [Source:UniProtKB/TrEMBL;Acc:G4VJB9]	gi|4507811|ref|NP_003349.1|	ceramide glucosyltransferase [Homo sapiens]
Smp_168950	4.2069	6.39055	6.32051	3.77423	2.6706	2.61225	2.14641	2.45777	-1.06548	5e-05	0.000268034	7.24168	4.51531	6.45102	4.34282	1.33519	1.7259	1.88385	1.7682	-0.851826	1.00694e-07	1.17139e-06	3.95042	2.53144	3.44938	2.55105	0.669151	0.917538	1.0254	0.868339	-1.00001	1.17839e-05	5.67173e-05	GO:0000287,GO:0004674,GO:0005524,GO:0005634,GO:0006468,GO:0018105,GO:0034048,GO:0035556	microtubule associated serine:threonine kinase;Smp_168950	Putative uncharacterized protein [Source:UniProtKB/TrEMBL;Acc:C1M042]	_	_
Smp_104310	19.1861	24.0823	15.5674	14.1737	9.23131	7.196	9.31922	9.1563	-1.06474	5e-05	0.000268034	28.0734	24.7798	20.0077	20.3471	7.81246	9.60533	7.90807	8.67895	-0.591242	2.1528e-05	0.000143967	16.5924	14.8399	11.7313	12.4516	4.03742	5.54375	4.60819	4.47123	-0.720994	5.29007e-05	0.000212819	GO:0000166,GO:0005525,GO:0005622,GO:0007264,GO:0015031	rab11;Smp_104310	Rab11, putative [Source:UniProtKB/TrEMBL;Acc:G4M0X0]	gi|4758984|ref|NP_004654.1|	ras-related protein Rab-11A isoform 1 [Homo sapiens]
Smp_134210	5.82107	7.71077	6.16006	5.75122	3.6387	2.6846	2.60679	3.23871	-1.06409	5e-05	0.000268034	7.00402	5.17769	5.43001	5.6367	1.4149	1.67825	1.45565	1.85578	-0.905754	9.56397e-09	1.3956e-07	4.02072	2.99908	3.07153	3.34891	0.734432	0.942624	0.735909	0.945402	-1.18314	8.97997e-11	1.39027e-09		peptidase inhibitor 16;note=predicted by EVM2;note=pfam_scan%3BPfam:PF00339.24%3B%3BE()%3D6.7E-11%3Bscore%3D42.1%3Bqu ery 132-222%3Bdescription%3DArrestin_N;note=iprscan%3BInterPro:IPR011021 : Arrestin-like%2C N-terminal%3BPfam:PF00339%3B%3Bscore%3D1.9E-10%3Bquery 170-222%3Bdescription%3DArrestin-like%2C N-terminal;Smp_134210
Smp_134140	8.24378	10.8973	9.35974	7.36843	4.58954	3.62241	3.44702	5.50362	-1.06348	5e-05	0.000268034	11.3193	7.58183	9.11798	7.21289	1.7035	2.05839	2.05974	3.25972	-1.12662	1.90238e-17	1.22327e-15	6.53029	4.82336	5.43867	4.98704	1.06612	1.36407	1.19941	1.81488	-1.18709	2.20759e-11	3.88003e-10	GO:0003824,GO:0004114,GO:0007165,GO:0008081,GO:0008152,GO:0016787,GO:0046872	cAMP specific 3'%2C5' cyclic phosphodiesterase 4D;Smp_134140	Putative camp-specific 3,5-cyclic phosphodiesterase [Source:UniProtKB/TrEMBL;Acc:G4VPI6]	gi|162329612|ref|NP_001104779.1|	cAMP-specific 3',5'-cyclic phosphodiesterase 4A isoform 3 [Homo sapiens]
SmVG_035383	4.34699	6.03781	4.63226	4.10557	2.72535	1.08229	2.84363	2.50254	-1.06284	5e-05	0.000268034	8.38479	5.70366	6.78617	6.23295	1.69471	2.63696	1.40401	2.59002	-0.868634	2.20852e-06	1.89907e-05	4.92851	3.34061	3.78288	3.90191	0.822054	1.54011	0.687625	1.29336	-1.04503	1.20253e-06	7.39363e-06
SmVG_008603	5.87647	8.39011	5.86431	3.49536	2.98703	2.6682	1.51461	4.1483	-1.06175	0.00095	0.00361893	3.72545	2.2561	2.46997	1.78555	0.324579	0.669967	1.1342	1.26914	-0.984352	0.0121608	0.0338933	5.77952	3.22184	3.93513	2.68818	1.01046	0.909494	1.02289	1.39492	-0.990192	0.00242749	0.00613273
SmVG_022264:Smp_010660	11.9731	12.8961	12.7551	12.0545	5.7791	5.27832	4.67353	8.07647	-1.06122	5e-05	0.000268034	12.2856	10.8779	12.0104	12.3694	2.72756	3.25645	3.41886	4.68131	-0.886522	7.12765e-20	5.7927e-18	7.37539	6.6473	7.0578	7.68779	1.49782	1.98653	1.78851	2.57096	-1.06339	1.03397e-12	2.42968e-11		60s ribosomal protein l6;Smp_010660	Putative 60s ribosomal protein L6 [Source:UniProtKB/TrEMBL;Acc:G4VMN8]	_	_
SmVG_022264:Smp_010670	11.9731	12.8961	12.7551	12.0545	5.7791	5.27832	4.67353	8.07647	-1.06122	5e-05	0.000268034	12.2856	10.8779	12.0104	12.3694	2.72756	3.25645	3.41886	4.68131	-0.886522	7.12765e-20	5.7927e-18	7.37539	6.6473	7.0578	7.68779	1.49782	1.98653	1.78851	2.57096	-1.06339	1.03397e-12	2.42968e-11		tegumental protein;Smp_010670	Putative abnormal long morphology protein 1 (Sp8) [Source:UniProtKB/TrEMBL;Acc:G4VMN9]	_	_
Smp_166820	2.77776	5.21131	5.98295	4.34598	1.85594	1.66723	2.32382	2.933	-1.06097	5e-05	0.000268034	5.24788	3.2594	6.59171	5.70767	1.11667	2.12065	1.49817	2.04215	-0.71193	0.000691753	0.00300281	2.94944	1.84784	3.63312	3.30887	0.582573	1.16111	0.732595	1.00539	-0.953034	3.71873e-05	0.000155664		hypothetical protein;Smp_166820	Putative uncharacterized protein [Source:UniProtKB/TrEMBL;Acc:G4VGI6]	gi|190194355|ref|NP_065941.2|	protein CIP2A [Homo sapiens]
Smp_088990	18.1416	21.4563	20.1882	19.3096	8.53962	7.45648	9.52758	12.3991	-1.06053	5e-05	0.000268034	18.6201	14.4403	16.6866	17.5321	3.28442	5.9754	4.01407	6.3093	-0.906349	2.02441e-16	1.14452e-14	10.9537	8.65991	9.62627	10.6247	1.71977	3.38486	2.09059	3.29783	-1.12071	3.403e-13	8.81798e-12	GO:0000151,GO:0000209,GO:0004842,GO:0005515,GO:0005737,GO:0008270,GO:0016567,GO:0031624,GO:0032436,GO:0042787,GO:0046872,GO:0061630	e3 ubiquitin protein ligase rnf14;Smp_088990	Putative ring finger protein 14 (Androgen receptor-associated protein 54) (Triad2 protein) [Source:UniProtKB/TrEMBL;Acc:G4VHM9]	gi|318067966|ref|NP_001188294.1|	E3 ubiquitin-protein ligase RNF14 isoform 1 [Homo sapiens]
Smp_133690	24.1888	27.8803	25.7708	23.7863	10.6358	11.2489	9.67208	17.2436	-1.05831	5e-05	0.000268034	22.8543	19.2889	21.3443	21.1824	3.8428	5.8572	5.55113	8.54102	-1.00436	2.3401e-31	6.36889e-29	13.6525	11.6599	12.5204	13.1686	2.14881	3.45708	3.05741	4.69823	-1.15749	6.2006e-11	9.94066e-10	GO:0004714,GO:0007155,GO:0016020,GO:0016021,GO:0016740,GO:0018108	discoidin domain containing receptor 2;Smp_133690	Putative discoidin domain receptor [Source:UniProtKB/TrEMBL;Acc:G4VDF2]	_	_
Smp_007550	23.502	26.1894	25.8124	24.1818	10.5341	13.3456	11.7273	12.3392	-1.05597	5e-05	0.000268034	31.9819	27.1323	29.5213	32.0368	5.90852	10.1767	9.99632	8.7383	-0.813663	1.72416e-22	1.94018e-20	18.3346	15.6778	16.6135	19.0765	3.08923	5.73196	5.08589	4.50054	-1.13764	2.11207e-22	2.23644e-20	GO:0004301,GO:0004463,GO:0005488,GO:0005737,GO:0005886,GO:0006508,GO:0008237,GO:0008270,GO:0016787,GO:0019370,GO:0042277,GO:0043171,GO:0044255,GO:0070006	leukotriene A 4 hydrolase;Smp_007550	Leukotriene A4 hydrolase (M01 family) [Source:UniProtKB/TrEMBL;Acc:G4M023]	gi|4505029|ref|NP_000886.1|	leukotriene A-4 hydrolase [Homo sapiens]
Smp_032280	8.62488	10.0479	12.8662	11.8164	5.22277	4.25153	5.18855	6.21111	-1.05451	5e-05	0.000268034	7.93478	6.34393	8.8085	8.27737	1.46334	2.20203	1.65785	2.31229	-1.03918	1.25614e-23	1.72948e-21	4.3066	3.57068	5.30779	5.58967	0.890387	1.57282	0.972049	1.41066	-1.14076	2.32511e-13	6.2712e-12	GO:0003676,GO:0003723	RNA binding protein MEX3B;Smp_032280	Putative uncharacterized protein [Source:UniProtKB/TrEMBL;Acc:G4VSI4]	_	_
SmVG_015550:Smp_149790	16.3577	19.2276	18.1188	15.5305	8.37794	7.60761	7.61609	9.73444	-1.05441	5e-05	0.000268034	17.9342	14.8335	16.2921	16.2185	3.41342	5.15004	4.19327	5.52749	-0.917729	2.87121e-17	1.79688e-15	10.557	8.81105	9.41026	9.87412	1.85999	2.98252	2.18243	2.93022	-1.16169	9.19837e-19	5.55595e-17		hypothetical protein;Smp_149790	Putative uncharacterized protein [Source:UniProtKB/TrEMBL;Acc:G4VI54]	gi|154350213|ref|NP_078817.2|	hypothetical protein LOC79591 [Homo sapiens]
SmVG_015550:Smp_149810	16.3577	19.2276	18.1188	15.5305	8.37794	7.60761	7.61609	9.73444	-1.05441	5e-05	0.000268034	17.9342	14.8335	16.2921	16.2185	3.41342	5.15004	4.19327	5.52749	-0.917729	2.87121e-17	1.79688e-15	10.557	8.81105	9.41026	9.87412	1.85999	2.98252	2.18243	2.93022	-1.16169	9.19837e-19	5.55595e-17		hypothetical protein;Smp_149810.2	Putative uncharacterized protein [Source:UniProtKB/TrEMBL;Acc:G4VI52]	gi|154350213|ref|NP_078817.2|	hypothetical protein LOC79591 [Homo sapiens]
SmVG_015550:Smp_149810.2	16.3577	19.2276	18.1188	15.5305	8.37794	7.60761	7.61609	9.73444	-1.05441	5e-05	0.000268034	17.9342	14.8335	16.2921	16.2185	3.41342	5.15004	4.19327	5.52749	-0.917729	2.87121e-17	1.79688e-15	10.557	8.81105	9.41026	9.87412	1.85999	2.98252	2.18243	2.93022	-1.16169	9.19837e-19	5.55595e-17		hypothetical protein;Smp_149810.2
SmVG_016736:Smp_055640	11.2219	12.3174	10.8363	10.8592	4.71542	5.43882	5.83537	5.79679	-1.054	5e-05	0.000268034	14.2049	11.535	11.5294	12.642	2.2243	4.21044	3.55232	3.76524	-0.910271	1.86287e-20	1.59133e-18	8.33113	6.94196	6.76805	7.77398	1.26325	2.5556	1.86047	2.04793	-1.14884	2.19316e-21	1.95946e-19		hypothetical protein;note=predicted by EVM2;Smp_055640
SmVG_016736:Smp_055650	11.2219	12.3174	10.8363	10.8592	4.71542	5.43882	5.83537	5.79679	-1.054	5e-05	0.000268034	14.2049	11.535	11.5294	12.642	2.2243	4.21044	3.55232	3.76524	-0.910271	1.86287e-20	1.59133e-18	8.33113	6.94196	6.76805	7.77398	1.26325	2.5556	1.86047	2.04793	-1.14884	2.19316e-21	1.95946e-19		hypothetical protein;note=predicted by EVM2;Smp_055650	Putative uncharacterized protein [Source:UniProtKB/TrEMBL;Acc:G4VHJ0]	_	_
Smp_199750	7.27841	8.08584	5.12195	5.36114	2.87953	1.93114	4.012	3.62939	-1.05363	0.00165	0.00579386	11.2758	8.06624	7.76442	9.11414	2.12839	3.65597	1.87675	3.84122	-0.816461	0.000336505	0.00161398	7.22607	5.14249	4.88421	5.97951	1.18795	2.26163	1.02312	2.14989	-0.964021	6.60686e-05	0.000258872		subfamily M12B unassigned peptidase;Smp_199750	Subfamily M12B unassigned peptidase (M12 family) [Source:UniProtKB/TrEMBL;Acc:G4M210]	_	_
SmVG_015539:Smp_149880	8.06636	8.6448	9.26254	7.94003	2.25082	5.6731	3.55951	4.86373	-1.05283	5e-05	0.000268034	7.12264	5.71251	6.97329	6.22624	0.868021	2.09618	3.01332	2.33607	-0.880807	0.00188026	0.0070573	4.48827	4.14865	4.44637	4.68167	0.667793	1.49202	1.75662	1.42435	-0.93992	1.26459e-06	7.72535e-06		major facilitator superfamily domain containing protein;Smp_149880	Putative uncharacterized protein [Source:UniProtKB/TrEMBL;Acc:G4VI43]	gi|111378386|ref|NP_068377.2|	hypothetical protein LOC126321 isoform a [Homo sapiens]
SmVG_015539:Smp_149890	8.06636	8.6448	9.26254	7.94003	2.25082	5.6731	3.55951	4.86373	-1.05283	5e-05	0.000268034	7.12264	5.71251	6.97329	6.22624	0.868021	2.09618	3.01332	2.33607	-0.880807	0.00188026	0.0070573	4.48827	4.14865	4.44637	4.68167	0.667793	1.49202	1.75662	1.42435	-0.93992	1.26459e-06	7.72535e-06		hypothetical protein;note=trans_spliced (SO:0000870);Smp_149890	Putative uncharacterized protein [Source:UniProtKB/TrEMBL;Acc:G4VI42]	_	_
Smp_211180	15.526	14.6338	14.7059	12.2522	4.3623	7.01679	7.04126	9.11809	-1.0525	0.013	0.0326454	17.2527	17.9186	16.6208	15.6259	2.86502	6.49927	6.35254	6.35463	-0.820666	7.36282e-08	8.8832e-07	9.75171	10.0961	9.09975	8.95907	1.36056	3.56794	2.98229	3.07889	-0.994407	2.67748e-08	2.41734e-07	GO:0005794,GO:0006486,GO:0008417,GO:0016020,GO:0016021,GO:0016740,GO:0016757,GO:0018392,GO:0032580,GO:0036065	alpha(13)fucosyltransferase;Smp_211180	Alpha(1,3)fucosyltransferase,putative [Source:UniProtKB/TrEMBL;Acc:G4LWN6]	gi|4758406|ref|NP_004470.1|	alpha-(1,3)-fucosyltransferase [Homo sapiens]
Smp_191400	4.87134	4.83086	4.64196	4.67735	1.41098	3.36732	2.45026	1.9448	-1.05211	5e-05	0.000268034	4.44507	4.18873	3.87008	4.36234	0.489701	1.48792	1.36369	0.92042	-0.990714	2.12942e-05	0.00014273	3.45448	3.4198	3.06721	3.7133	0.473231	1.37659	1.20961	0.753287	-1.07969	1.56253e-07	1.18495e-06		egg protein CP391S;Smp_191400	Putative uncharacterized protein [Source:UniProtKB/TrEMBL;Acc:G4LW40]	_	_
Smp_156770	44.448	63.0703	54.2315	44.6425	21.666	22.0194	21.3661	34.7091	-1.04885	5e-05	0.000268034	72.1616	47.0001	63.9103	54.6682	12.4007	17.0516	15.4326	24.5058	-0.960602	1.53472e-14	6.65214e-13	41.1083	26.8985	35.5231	32.0132	6.23149	9.33426	7.54867	12.2034	-1.11035	3.96124e-09	4.3447e-08		major tegumental antigen SM15;Smp_156770	Major tegumental antigen SM15; Putative major tegumental antigen SM15 [Source:UniProtKB/TrEMBL;Acc:Q05645]	_	_
Smp_127620	25.4492	26.0296	33.7242	30.0822	11.4066	13.2775	14.0454	17.0389	-1.04769	5e-05	0.000268034	23.051	21.3494	28.8755	28.6007	4.57663	8.92251	7.2001	9.14707	-0.85857	6.84622e-15	3.12974e-13	13.1121	12.1998	16.0803	16.7389	2.31866	4.92347	3.53796	4.58585	-1.12374	1.86195e-13	5.03783e-12	GO:0003676,GO:0003723	hypothetical protein;Smp_127620	Putative uncharacterized protein [Source:UniProtKB/TrEMBL;Acc:G4M0X4]	_	_
SmVG_002464:Smp_008190	19.6714	24.5419	21.5121	16.3675	11.4677	7.62755	8.88516	11.8121	-1.04476	5e-05	0.000268034	22.4657	16.886	19.1409	15.5878	4.76493	5.81326	4.41183	6.4069	-0.927157	1.21241e-12	3.70466e-11	12.8448	9.74433	10.7856	9.2354	2.49886	3.26114	2.23097	3.29009	-1.11834	6.82205e-12	1.36393e-10		rho guanine nucleotide exchange factor 11;Smp_008190	Putative uncharacterized protein [Source:UniProtKB/TrEMBL;Acc:G4V7I1]	_	_
SmVG_002464:Smp_126600	19.6714	24.5419	21.5121	16.3675	11.4677	7.62755	8.88516	11.8121	-1.04476	5e-05	0.000268034	22.4657	16.886	19.1409	15.5878	4.76493	5.81326	4.41183	6.4069	-0.927157	1.21241e-12	3.70466e-11	12.8448	9.74433	10.7856	9.2354	2.49886	3.26114	2.23097	3.29009	-1.11834	6.82205e-12	1.36393e-10		hypothetical protein;Smp_126600	Putative uncharacterized protein [Source:UniProtKB/TrEMBL;Acc:G4V7I0]	_	_
Smp_046280	10.8562	14.9612	13.7862	15.4341	5.3763	7.32823	6.05614	7.94903	-1.04305	5e-05	0.000268034	15.9148	10.6419	14.2317	17.3193	2.62097	4.87069	4.81097	5.01472	-0.779228	4.42303e-08	5.60203e-07	8.93113	6.01645	7.72583	10.0462	1.29859	2.68421	2.33252	2.49893	-1.0836	2.96018e-09	3.36731e-08		actin binding protein anillin;Smp_046280.2	Putative uncharacterized protein [Source:UniProtKB/TrEMBL;Acc:G4VKS8]	_	_
Smp_180500	2.00939	1.67704	1.82706	1.40787	0.59504	1.0497	0.699033	1.01923	-1.04131	0.00155	0.00550008	2.54488	2.62063	2.39832	2.18584	0.441293	0.810992	0.754692	0.847315	-0.921795	4.70884e-08	5.92555e-07	1.38193	1.53178	1.29707	1.2697	0.209254	0.403792	0.392007	0.393577	-1.18056	4.45275e-09	4.82213e-08	GO:0016020,GO:0017121,GO:0017128	phospholipid scramblase;Smp_180500	Phospholipid scramblase-related [Source:UniProtKB/TrEMBL;Acc:G4M0E1]	gi|10863877|ref|NP_066928.1|	phospholipid scramblase 1 [Homo sapiens]
Smp_155920	54.923	61.4494	65.0705	68.4147	28.0867	25.042	31.1798	37.1734	-1.04036	5e-05	0.000268034	60.5611	51.1868	62.0172	70.2416	11.5853	21.4602	15.2814	20.7575	-0.870679	1.67626e-26	2.92796e-24	35.3228	29.8937	35.4014	42.1436	6.09238	12.1364	7.71862	10.6531	-1.17306	2.44358e-18	1.40661e-16	GO:0003676,GO:0003723	high density lipoprotein receptor (hdl);Smp_155920	High-density lipoprotein receptor (Hdl) [Source:UniProtKB/TrEMBL;Acc:G4VS74]	_	_
Smp_124980	59.0647	68.4024	54.0756	44.6509	25.3496	27.2323	23.3915	34.0708	-1.03947	5e-05	0.000268034	51.7964	44.2157	41.5248	38.089	8.47943	13.057	12.8779	15.0475	-0.947219	7.33258e-20	5.91815e-18	32.2626	27.9262	25.4784	24.4253	5.01786	8.0357	7.34654	8.62781	-1.15481	2.73135e-13	7.2754e-12	GO:0005737	Tumor necrosis factor%2C alpha induced protein;Smp_124980	Tumor necrosis factor induced protein, putative [Source:UniProtKB/TrEMBL;Acc:G4LZK5]	_	_
Smp_017420	24.414	27.0911	30.9742	26.6963	8.59251	11.3868	11.8887	21.2945	-1.03817	5e-05	0.000268034	33.4703	27.6598	34.5734	33.8538	3.85777	8.70874	7.78865	13.0668	-1.14887	5.22435e-16	2.80461e-14	20.2733	16.7252	20.5561	21.0326	2.174	5.25311	4.20698	7.09251	-1.28088	3.34699e-08	2.97176e-07	GO:0016020,GO:0016021	voltage gated hydrogen channel 1;Smp_017420	Putative uncharacterized protein [Source:UniProtKB/TrEMBL;Acc:G4LWE5]	_	_
SmVG_011669:Smp_129390	4.81236	4.22986	5.25544	5.26111	1.67345	2.62537	2.47528	2.82068	-1.0275	5e-05	0.000268034	3.29888	3.57368	4.00726	4.49333	0.617943	1.40743	1.24338	1.29977	-0.825638	9.0042e-09	1.32781e-07	1.9167	2.11371	2.28724	2.69596	0.327596	0.801012	0.629454	0.670928	-1.10783	1.23058e-11	2.30452e-10		vacuolar protein sorting associated protein 13B;Smp_129390	Putative vacuolar protein sorting-associated protein (Vps13b) [Source:UniProtKB/TrEMBL;Acc:G4VEG9]	_	_
SmVG_011669:Smp_129400	4.81236	4.22986	5.25544	5.26111	1.67345	2.62537	2.47528	2.82068	-1.0275	5e-05	0.000268034	3.29888	3.57368	4.00726	4.49333	0.617943	1.40743	1.24338	1.29977	-0.825638	9.0042e-09	1.32781e-07	1.9167	2.11371	2.28724	2.69596	0.327596	0.801012	0.629454	0.670928	-1.10783	1.23058e-11	2.30452e-10		Vacuolar protein sorting associated protein;Smp_129400	Putative uncharacterized protein [Source:UniProtKB/TrEMBL;Acc:G4VEG8]	_	_
Smp_021950	48.1534	67.8936	57.0058	50.8772	23.0663	25.0773	29.8863	31.8637	-1.02694	5e-05	0.000268034	78.6688	53.3098	61.7108	61.7053	12.8585	24.8911	18.2331	22.2937	-0.807092	2.18912e-12	6.35713e-11	43.9851	30.4853	33.8424	36.1825	6.66065	13.7654	9.06871	11.1781	-1.03045	1.69649e-12	3.80912e-11	GO:0005622,GO:0008270,GO:0046872	suppressor of hairy wing;Smp_021950.2
SmVG_024392:Smp_163730	2.66021	2.75875	2.97984	2.9462	1.04116	1.37815	1.26002	1.88942	-1.02663	5e-05	0.000268034	2.58126	2.40997	2.67174	3.04966	0.453127	0.899057	0.893712	1.07318	-0.840089	4.93098e-13	1.63477e-11	1.54983	1.48932	1.63618	1.95504	0.270684	0.581842	0.522049	0.617243	-0.955928	3.18989e-08	2.847e-07		rhoptry protein;Smp_163730	Putative rhoptry protein [Source:UniProtKB/TrEMBL;Acc:G4VTW7]	_	_
SmVG_024392:Smp_163740	2.66021	2.75875	2.97984	2.9462	1.04116	1.37815	1.26002	1.88942	-1.02663	5e-05	0.000268034	2.58126	2.40997	2.67174	3.04966	0.453127	0.899057	0.893712	1.07318	-0.840089	4.93098e-13	1.63477e-11	1.54983	1.48932	1.63618	1.95504	0.270684	0.581842	0.522049	0.617243	-0.955928	3.18989e-08	2.847e-07		nesprin 1;Smp_163740	Spectrin-like nuclear envelope protein [Source:UniProtKB/TrEMBL;Acc:G4VTW6]	gi|23097308|ref|NP_149062.1|	nesprin-1 isoform 2 [Homo sapiens]
Smp_030370	1350.73	1186.87	1451.06	1393.47	619.505	788.454	533.282	702.431	-1.02564	5e-05	0.000268034	1357.27	1426.92	1558.38	1621.04	332.533	442.096	545.903	486.666	-0.754376	5.47171e-10	1.04123e-08	761.575	800.325	852.924	929.447	167.174	241.449	264.366	242.789	-1.02451	3.83268e-12	8.15704e-11	GO:0005509,GO:0005515,GO:0005783,GO:0005788,GO:0006457,GO:0046872,GO:0051082	calreticulin;Smp_030370	Calreticulin [Source:UniProtKB/Swiss-Prot;Acc:Q06814]	gi|10716563|ref|NP_001737.1|	calnexin precursor [Homo sapiens]
Smp_150940	3.23852	3.79434	3.97549	4.08863	1.84681	1.35879	1.93849	2.27291	-1.02535	5e-05	0.000268034	3.37191	2.72115	3.35272	4.01717	0.750847	1.34387	0.756132	1.26173	-0.797062	2.08505e-09	3.4959e-08	1.94806	1.64638	1.89706	2.39678	0.400617	0.766318	0.421281	0.654357	-1.01527	5.7532e-10	7.615e-09	GO:0005622,GO:0008270,GO:0046872	zinc finger protein 608;Smp_150940	Putative uncharacterized protein [Source:UniProtKB/TrEMBL;Acc:G4VHS4]	_	_
Smp_154190	41.961	44.0151	31.7925	34.8363	21.0163	12.8225	14.9711	26.2098	-1.02446	5e-05	0.000268034	35.7707	34.1273	24.7721	28.826	6.05709	6.92841	4.71103	11.2669	-1.20984	3.35145e-10	6.68177e-09	26.2819	23.64	17.8427	22.3056	4.6517	5.27135	3.92544	7.3613	-1.2402	9.68974e-09	9.87041e-08	GO:0016020,GO:0016021	25 kDa integral membrane protein;note=pfam_scan%3BPfam:PF00335.15%3B%3BE()%3D1.6E-13%3Bscore%3D50.3%3Bqu ery 3-80%3Bdescription%3DTetraspannin;note=iprscan%3BInterPro:IPR018499 : Tetraspanin%3BPfam:PF00335%3B%3Bscore%3D8.6E-15%3Bquery 3-86%3Bdescription%3DTetraspanin;Smp_154190	Tetraspanin family protein 16, invertebrate,putative [Source:UniProtKB/TrEMBL;Acc:G4LW55]	_	_
Smp_104970	7.98658	9.25427	10.7782	11.1765	3.62383	4.68198	4.37914	6.60191	-1.02307	5e-05	0.000268034	7.76959	6.47503	8.96081	10.1196	1.38375	2.76264	2.39236	3.30567	-0.85788	2.25198e-09	3.7449e-08	4.6128	3.74326	5.08102	6.0646	0.754072	1.55404	1.23052	1.70901	-1.09047	4.8622e-08	4.13311e-07	GO:0005515,GO:0005578,GO:0005615,GO:0007409,GO:0016020,GO:0016021	leucine rich repeat containing protein 70;Smp_104970	Putative leucine-rich transmembrane protein [Source:UniProtKB/TrEMBL;Acc:G4VJW0]	_	_
Smp_134430	3.62507	3.95016	3.90485	3.49466	1.67212	1.72704	1.66167	2.30862	-1.0229	5e-05	0.000268034	3.98121	3.50504	3.77097	3.63404	0.787985	1.08401	1.05087	1.32721	-0.921733	1.90211e-13	6.82832e-12	2.30783	2.06684	2.1404	2.17718	0.408911	0.625306	0.537897	0.687271	-1.15122	4.75546e-14	1.40647e-12	GO:0003677,GO:0003700,GO:0004222,GO:0005509,GO:0005515,GO:0005634,GO:0006355,GO:0006508,GO:0008233,GO:0008237,GO:0008270,GO:0016787,GO:0043565,GO:0046872	bone morphogenetic protein;Smp_134430	Putative tolloid [Source:UniProtKB/TrEMBL;Acc:G4VQ02]	gi|22547221|ref|NP_036596.3|	tolloid-like protein 1 isoform 1 precursor [Homo sapiens]
Smp_088950	44.7111	42.2147	55.0537	47.9385	16.9514	27.4978	21.244	27.7791	-1.02277	5e-05	0.000268034	45.041	42.9736	55.2566	51.6044	7.84328	15.1514	17.1514	16.3435	-0.883282	7.00601e-08	8.50533e-07	25.76	24.7848	30.9585	30.5058	4.07846	8.46761	8.59314	8.30346	-1.14086	2.77776e-11	4.79373e-10	GO:0000166,GO:0005524	Hypoxia up regulated protein 1;note=predicted by EVM2;note=pfam_scan%3BPfam:PF00012.15%3B%3BE()%3D1.9E-67%3Bscore%3D227.4%3Bq uery 3-406%3Bdescription%3DHSP70;note=iprscan%3BInterPro:IPR013126 : Heat shock protein 70%3BPfam:PF00012%3B%3Bscore%3D2.3E-19%3Bquery 246-398%3Bdescription%3DHeat shock protein 70;Smp_088950	Hypoxia upregulated 1 (Hyou1)-related [Source:UniProtKB/TrEMBL;Acc:G4VAR6]	gi|42544159|ref|NP_006635.2|	heat shock protein 105 kDa [Homo sapiens]
Smp_212450	20.7774	16.5119	16.8942	17.2053	4.11917	11.3248	6.9825	12.7351	-1.0217	5e-05	0.000268034	27.6356	30.8496	23.7173	28.3929	5.72629	8.15594	10.8901	9.37484	-0.755151	1.85838e-06	1.62061e-05	17.0485	19.8441	14.3546	17.6587	3.42318	5.36978	5.94751	5.05279	-0.972723	5.32127e-07	3.53255e-06	GO:0016020,GO:0016021,GO:0016788	placental protein 11;Smp_212450	Putative uncharacterized protein [Source:UniProtKB/TrEMBL;Acc:G4LY12]	gi|289063433|ref|NP_001165910.1|	poly(U)-specific endoribonuclease isoform 1 precursor [Homo sapiens]
Smp_040080	59.3524	65.5221	58.2103	57.4806	25.6523	29.3681	29.3188	34.1838	-1.02126	5e-05	0.000268034	59.5369	53.8943	53.154	57.1594	12.3296	20.5134	18.8222	21.0168	-0.755302	1.72722e-20	1.49731e-18	34.3211	31.3866	30.0627	34.052	6.5123	11.5294	9.42928	10.6275	-0.956094	3.0149e-17	1.53011e-15	GO:0016020,GO:0016021	hypothetical protein;Smp_040080	Putative uncharacterized protein [Source:UniProtKB/TrEMBL;Acc:G4VKI4]	_	_
Smp_086480	64.2329	91.297	81.7047	74.1445	42.0823	24.252	38.3103	48.9542	-1.01951	5e-05	0.000268034	69.9615	47.1756	60.9772	62.7477	14.6163	20.7555	11.4939	22.1677	-0.897788	2.86728e-06	2.40697e-05	41.6517	28.2019	35.8883	38.2748	7.88941	12.0043	5.96904	11.752	-1.09584	2.65092e-09	3.04785e-08	GO:0005509,GO:0005875,GO:0007017,GO:0030286	tegument-allergen-like protein;Sm21.7%3Bcurrent%3Dfalse;Smp_086480	Antigen Sm21.7 [Source:UniProtKB/Swiss-Prot;Acc:P32070]	_	_
SmVG_031240	42.3689	44.589	38.0585	48.276	16.0846	17.9826	22.8692	28.7081	-1.01677	5e-05	0.000268034	35.2013	33.533	30.1229	42.7674	6.36664	13.7377	9.74383	13.9191	-0.808607	5.91301e-17	3.51269e-15	20.3794	19.4207	17.0953	25.5318	3.34892	7.73734	4.91971	7.14682	-1.0361	1.21157e-10	1.8199e-09	GO:0008271,GO:0008272,GO:0016020,GO:0055085,GO:0015116,GO:0016021
Smp_129210	31.7	41.3079	36.6588	34.7371	13.8818	15.8379	19.0571	22.7985	-1.01257	5e-05	0.000268034	35.5243	26.1705	30.8187	32.4452	5.49562	11.9354	8.35284	11.6786	-0.881725	9.10637e-14	3.46013e-12	20.4134	15.1222	17.2955	19.2014	2.84518	6.70807	4.21475	5.93868	-1.09194	6.39649e-12	1.29089e-10	GO:0000049,GO:0000166,GO:0003723,GO:0004812,GO:0004831,GO:0004832,GO:0005524,GO:0005737,GO:0005829,GO:0006412,GO:0006418,GO:0006437,GO:0006438,GO:0016874	tyrosyl tRNA synthetase;Smp_129210	Tyrosyl-tRNA synthetase, putative [Source:UniProtKB/TrEMBL;Acc:G4M0L7]	_	_
Smp_143310	4.18635	6.05966	4.11557	5.34501	2.35997	2.11171	1.91662	3.42584	-1.00574	5e-05	0.000268034	6.06276	3.51757	4.3634	5.3543	0.988342	1.14129	1.1266	1.8983	-0.98391	2.03878e-07	2.18097e-06	3.55102	2.13083	2.51249	3.35148	0.60116	0.814182	0.667579	1.07379	-1.07717	3.96551e-06	2.13109e-05	GO:0016020,GO:0016021	hypothetical protein;Smp_143310	Putative uncharacterized protein [Source:UniProtKB/TrEMBL;Acc:G4LUK6]	_	_
Smp_163160	3.04321	4.74619	4.4389	3.49832	1.63764	1.93019	1.94534	2.32024	-1.00549	5e-05	0.000268034	3.93738	2.37804	3.58066	3.19197	0.600338	1.14729	1.00739	1.09905	-0.850097	4.82198e-06	3.81321e-05	2.26373	1.38173	2.01507	1.91143	0.310712	0.652079	0.504456	0.559819	-1.10687	2.87745e-07	2.04642e-06	GO:0005216,GO:0005262,GO:0005515,GO:0005887,GO:0006810,GO:0006811,GO:0006828,GO:0007338,GO:0015279,GO:0016020,GO:0016021,GO:0051480,GO:0055085,GO:0070588	short transient receptor potential channel 6;Smp_163160	Putative transient receptor potential channel [Source:UniProtKB/TrEMBL;Acc:G4VSU8]	gi|194733735|ref|NP_001124170.1|	short transient receptor potential channel 3 isoform a [Homo sapiens]
Smp_145770	4.24323	5.49798	5.57907	4.44851	1.61889	2.55663	2.5404	3.15956	-1.0013	5e-05	0.000268034	10.7843	9.72589	10.5029	11.4485	2.20284	5.24801	3.89422	5.0811	-0.627722	1.99158e-07	2.13243e-06	6.50793	5.80135	6.10234	7.03346	1.16245	3.02925	1.94003	2.64302	-0.74883	7.93259e-06	3.99049e-05	GO:0005622,GO:0007165	hypothetical protein;Smp_145770	Putative uncharacterized protein [Source:UniProtKB/TrEMBL;Acc:G4M1P1]	_	_
Smp_083580	75.1456	104.667	91.6867	102.281	42.0396	50.3572	32.9269	61.4154	-1.00116	5e-05	0.000268034	64.2615	45.45	53.431	61.7491	15.7802	20.0476	21.0544	24.2698	-0.566948	0.000103108	0.000579298	131.592	99.2944	116.386	142.091	26.2704	33.0696	46.6028	42.3042	-0.829923	3.95448e-06	2.12649e-05		hypothetical protein;note=predicted by EVM2;Smp_083580
Smp_147060	8.8529	8.93867	6.26247	6.08116	6.59911	2.22949	1.95918	4.27157	-1.00079	0.0089	0.0239577	5.98114	5.72535	4.4605	4.36467	1.8581	1.02672	0.882164	1.57551	-0.984093	0.00888225	0.0261253	3.6072	3.4755	2.70663	2.81619	1.04593	0.699487	0.468507	0.931651	-1.10567	0.00141252	0.0037931		hypothetical protein;Smp_147060	Putative uncharacterized protein [Source:UniProtKB/TrEMBL;Acc:G4VKU0]	_	_
SmVG_020579:Smp_149460	3.47377	4.12163	4.64098	3.65644	1.6321	2.09463	1.84796	2.37491	-0.999421	0.00045	0.00189572	3.68075	2.70834	3.74577	3.33126	0.616965	1.09773	1.12078	1.19423	-0.861254	1.08079e-08	1.55196e-07	2.22081	1.74198	2.20478	2.07422	0.368725	0.654442	0.631214	0.681244	-1.04851	1.01377e-08	1.03022e-07		Tyrosine Kinase%2C TK group%2C SYK family;Smp_149460	Tyrosine kinase [Source:UniProtKB/TrEMBL;Acc:G4VKS4]	gi|21361553|ref|NP_003168.2|	tyrosine-protein kinase SYK isoform 1 [Homo sapiens]
SmVG_020579:Smp_149470	3.47377	4.12163	4.64098	3.65644	1.6321	2.09463	1.84796	2.37491	-0.999421	0.00045	0.00189572	3.68075	2.70834	3.74577	3.33126	0.616965	1.09773	1.12078	1.19423	-0.861254	1.08079e-08	1.55196e-07	2.22081	1.74198	2.20478	2.07422	0.368725	0.654442	0.631214	0.681244	-1.04851	1.01377e-08	1.03022e-07		tyrosine protein kinase SYK;note=pfam_scan%3BPfam:PF00017.19%3B%3BE()%3D2.1E-15%3Bscore%3D56.1%3Bqu ery 49-124%3Bdescription%3DSH2;note=pfam_scan%3BPfam:PF00017.19%3B%3BE()%3D9.6E-17%3Bscore%3D60.4%3Bqu ery 202-277%3Bdescription%3DSH2;note=iprscan%3BInterPro:IPR000980 : SH2 motif%3BPfam:PF00017%3B%3Bscore%3D1.4E-18%3Bquery 202-277%3Bdescription%3DSH2 motif;note=iprscan%3BInterPro:IPR000980 : SH2 …	Putative tyrosine-protein kinase zap-70 [Source:UniProtKB/TrEMBL;Acc:G4VKS5]	gi|31455611|ref|NP_001070.2|	tyrosine-protein kinase ZAP-70 isoform 1 [Homo sapiens]
Smp_139190	7.48783	7.75773	9.17949	8.3997	3.66674	3.80487	4.09631	4.85564	-0.999017	5e-05	0.000268034	6.47705	5.94527	7.45555	7.52323	1.32381	2.48363	1.95141	2.31696	-0.832898	1.64981e-17	1.07265e-15	3.74606	3.46308	4.21577	4.49657	0.704215	1.40803	0.981119	1.205	-1.10341	2.79342e-17	1.42614e-15	GO:0001708,GO:0005488,GO:0005515,GO:0005881,GO:0007026,GO:0007389,GO:0008013,GO:0008283,GO:0016477,GO:0030178,GO:0030877,GO:0045295,GO:0045595,GO:0045732,GO:0090090	adenomatous polyposis coli protein;Smp_139190	Adenomatous polyposis coli protein, putative [Source:UniProtKB/TrEMBL;Acc:G4LUU8]	_	_
Smp_199810	4.98423	6.09847	5.29313	5.03237	1.79766	3.37995	2.42452	3.11709	-0.997962	5e-05	0.000268034	4.82213	3.89563	4.10619	4.38342	0.700638	1.43423	1.63589	1.70379	-0.837573	4.72287e-06	3.75268e-05	2.92771	2.35169	2.40841	2.66636	0.347819	0.810673	0.807396	0.861498	-1.04811	1.54306e-06	9.25514e-06	GO:0000166,GO:0005524,GO:0006457,GO:0016301,GO:0016310,GO:0044267,GO:0051082	1 phosphatidylinositol 3 phosphate 5 kinase;Smp_199810	Fyve finger-containing phosphoinositide kinase,fyv1, putative [Source:UniProtKB/TrEMBL;Acc:G4M224]	gi|121583483|ref|NP_055855.2|	1-phosphatidylinositol-3-phosphate 5-kinase isoform 2 [Homo sapiens]
SmVG_029200:Smp_169450	20.6863	24.98	22.7709	21.0852	11.6391	7.65533	10.8504	14.7018	-0.99725	5e-05	0.000268034	26.2127	21.0569	23.2919	24.4532	5.56872	8.57697	5.25424	9.46339	-0.876325	6.45229e-13	2.06831e-11	15.1221	12.1891	13.1523	14.4781	2.87923	4.78299	2.63389	4.79494	-1.05195	1.67352e-11	3.02339e-10		histone H3;Smp_169450
SmVG_029200:Smp_177920	20.6863	24.98	22.7709	21.0852	11.6391	7.65533	10.8504	14.7018	-0.99725	5e-05	0.000268034	26.2127	21.0569	23.2919	24.4532	5.56872	8.57697	5.25424	9.46339	-0.876325	6.45229e-13	2.06831e-11	15.1221	12.1891	13.1523	14.4781	2.87923	4.78299	2.63389	4.79494	-1.05195	1.67352e-11	3.02339e-10		serine:threonine protein;Smp_177920	Protein kinase [Source:UniProtKB/TrEMBL;Acc:G4LXU8]	gi|30039692|ref|NP_835464.1|	serine/threonine-protein kinase Nek8 [Homo sapiens]
Smp_070540	115.945	136.879	105.853	95.7407	36.769	43.0858	63.6497	84.1747	-0.997018	5e-05	0.000268034	156.02	125.057	117.186	119.181	21.6367	50.889	31.7094	56.0592	-0.943621	1.29717e-11	3.35857e-10	96.3888	77.8846	71.4676	76.2449	12.6043	31.37	17.9179	31.8434	-1.03944	4.16842e-07	2.85336e-06		hypothetical protein;Smp_070540	Putative uncharacterized protein [Source:UniProtKB/TrEMBL;Acc:G4V5A1]	_	_
SmVG_007071:Smp_210100	2.94998	3.04635	3.17134	2.62999	1.59124	1.55797	1.10462	1.66214	-0.995814	0.0001	0.000501375	2.83636	2.72537	2.81987	2.84393	0.729309	0.999011	1.17957	0.982699	-0.640416	4.70614e-05	0.000288961	1.65945	1.59839	1.52752	1.70859	0.355759	0.534117	0.54122	0.484531	-0.956629	1.20938e-08	1.20755e-07		mechanosensory protein 2;Smp_210100
SmVG_007071:Smp_210110	2.94998	3.04635	3.17134	2.62999	1.59124	1.55797	1.10462	1.66214	-0.995814	0.0001	0.000501375	2.83636	2.72537	2.81987	2.84393	0.729309	0.999011	1.17957	0.982699	-0.640416	4.70614e-05	0.000288961	1.65945	1.59839	1.52752	1.70859	0.355759	0.534117	0.54122	0.484531	-0.956629	1.20938e-08	1.20755e-07		mitotic checkpoint serine:threonine protein;Smp_210110	SPFH domain / Band 7 family protein,putative [Source:UniProtKB/TrEMBL;Acc:G4LUZ6]	gi|59814247|ref|NP_001202.4|	mitotic checkpoint serine/threonine-protein kinase BUB1 beta [Homo sapiens]
Smp_144970	24.0143	26.099	27.2788	24.4639	8.67434	12.7918	12.4925	17.1742	-0.994206	5e-05	0.000268034	26.0995	22.4065	27.1236	26.3495	3.76308	8.78568	7.35251	9.49705	-0.957351	3.39875e-12	9.58446e-11	14.7952	12.8136	15.0308	15.4183	1.92641	4.84379	3.61794	4.77922	-1.15703	7.07664e-11	1.12401e-09	GO:0000166,GO:0004008,GO:0005524,GO:0005802,GO:0005887,GO:0006812,GO:0006878,GO:0016020,GO:0016021,GO:0016787,GO:0019829,GO:0030001,GO:0046872,GO:0048471,GO:0060003	copper transporting ATPase 1;Smp_144970	Putative copper-transporting atpase 1, 2 (Copper pump 1,2) [Source:UniProtKB/TrEMBL;Acc:G4VJS2]	gi|115529486|ref|NP_000043.3|	copper-transporting ATPase 1 [Homo sapiens]
Smp_160860	3.99157	5.339	4.02214	4.66704	2.35104	1.82968	3.18676	1.68089	-0.993849	0.00225	0.00758433	4.80934	2.94337	3.99953	4.15648	0.992633	1.48393	1.10342	1.25113	-0.715887	0.0072171	0.0219895	3.14896	1.85809	2.52259	2.83043	0.562274	1.12853	0.626517	0.71194	-0.938531	0.000197521	0.00067749		tetratricopeptide repeat protein 8;Smp_160860	Putative tetratricopeptide repeat protein 8,tpr8 [Source:UniProtKB/TrEMBL;Acc:G4VFV8]	gi|53759120|ref|NP_653197.2|	tetratricopeptide repeat protein 8 isoform A [Homo sapiens]
Smp_137610	5.62587	6.23088	6.59804	5.95137	2.18784	3.65767	3.20457	3.20578	-0.993774	5e-05	0.000268034	7.15137	6.36351	6.92854	7.19423	1.20465	2.35765	2.48728	2.24677	-0.827528	2.34771e-10	4.82022e-09	4.06407	3.60855	3.84837	4.18257	0.608033	1.27749	1.23791	1.10752	-1.07447	1.43041e-10	2.10079e-09	GO:0004672,GO:0004713,GO:0004715,GO:0004871,GO:0005102,GO:0005524,GO:0005925,GO:0006468,GO:0007165,GO:0007169,GO:0007172,GO:0016301,GO:0016310,GO:0016772,GO:0030154,GO:0031234,GO:0038083,GO:0042127,GO:0045087	focal adhesion kinase 1;Smp_137610	Tyrosine kinase [Source:UniProtKB/TrEMBL;Acc:G4VP68]	gi|27886586|ref|NP_775266.1|	protein-tyrosine kinase 2-beta isoform a [Homo sapiens]
SmVG_029474	29.348	33.7943	34.5097	33.4142	13.6774	16.9131	13.4279	21.8211	-0.993271	5e-05	0.000268034	33.4626	28.1557	33.4604	34.8768	6.38719	10.1663	10.5359	13.2655	-0.836714	4.9505e-21	4.56187e-19	17.6759	15.0928	17.33	19.1669	3.00544	5.18515	4.78695	6.04478	-1.02292	1.63986e-11	2.98622e-10	GO:0003824,GO:0008152,GO:0005634,GO:0008134
Smp_161480	36.6094	39.7373	47.5378	42.2028	18.2525	18.2042	23.2046	24.0084	-0.989163	5e-05	0.000268034	41.3434	36.9797	48.4841	48.827	8.68081	17.3107	12.6312	15.3818	-0.783802	9.61614e-15	4.31179e-13	23.2047	20.9883	26.7475	28.2544	4.40669	9.44649	6.19908	7.62555	-1.04511	4.97682e-15	1.77121e-13	GO:0003743,GO:0006413	eukaryotic translation initiation;Smp_161480	Putative eukaryotic translation initiation factor 3 subunit (Eif-3) [Source:UniProtKB/TrEMBL;Acc:G4VA33]	gi|87162455|ref|NP_056044.3|	hypothetical protein LOC23277 [Homo sapiens]
Smp_176480	2.76297	4.79304	3.02718	2.82012	2.21775	1.37701	1.5664	1.6015	-0.986926	0.00045	0.00189572	4.48161	2.71415	3.01328	3.47702	0.95579	1.36458	1.08508	1.11082	-0.639313	0.000996658	0.00412297	2.7021	1.67332	1.8222	2.27121	0.545976	0.821068	0.579596	0.588831	-0.943263	1.14788e-05	5.54046e-05		myotubularin protein;note=tmhmm%3B%3Bquery 1-855%3B;note=%3Bquery 838-855%3B;note=%3Bquery 815-837%3B;note=%3Bquery 1-814%3B;Smp_176480	Putative uncharacterized protein [Source:UniProtKB/TrEMBL;Acc:G4LWC1]	_	_
Smp_144610	21.1977	26.1761	20.8611	17.4423	5.46178	13.2166	9.21536	15.3616	-0.986033	5e-05	0.000268034	28.992	21.3039	22.393	18.848	3.42276	6.74802	9.45983	9.96439	-0.922143	5.3514e-05	0.000323656	17.1606	13.0365	13.6112	11.6336	1.88249	3.90356	4.88783	5.4067	-0.949212	0.000277562	0.000922374	GO:0006820,GO:0016020,GO:0016021,GO:0022857,GO:0055085	sugar phosphate exchanger 2;Smp_144610
Smp_073280	6.57121	7.28771	7.09943	4.48969	3.9756	3.1849	2.09048	3.62661	-0.982691	5e-05	0.000268034	5.36115	4.81806	5.27223	3.88094	1.42176	1.29183	1.56955	1.73183	-0.847	3.55884e-07	3.58118e-06	3.08788	2.83384	3.00411	2.31975	0.765078	0.777284	0.793258	0.897799	-0.97222	1.5667e-06	9.37725e-06	GO:0016020,GO:0016021	hypothetical protein;Smp_073280	Putative uncharacterized protein [Source:UniProtKB/TrEMBL;Acc:G4VA88]	_	_
Smp_157340	16.4735	18.5961	17.2911	17.4403	7.11969	7.04407	9.76232	11.3996	-0.982529	5e-05	0.000268034	17.5664	15.5722	16.1741	17.8939	3.24082	6.56053	4.35065	6.70029	-0.852773	1.23958e-20	1.099e-18	9.93766	8.89438	8.94981	10.4764	1.6649	3.59199	2.14754	3.35108	-1.03945	2.61422e-12	5.71994e-11	GO:0007165	rassf1;Smp_157340	Putative rassf1 [Source:UniProtKB/TrEMBL;Acc:G4VCS3]	_	_
SmVG_015979:Smp_151540	2.22786	2.32329	2.43467	1.84324	1.08936	0.660499	1.01554	1.70335	-0.982387	0.0004	0.00171395	1.86905	1.78844	1.80949	1.65727	0.401619	0.62472	0.292944	0.868474	-1.02269	3.74265e-06	3.05016e-05	1.21115	1.14986	1.10371	1.08232	0.269456	0.45952	0.216476	0.516307	-0.842682	0.000344139	0.00110841		cadherin;Smp_151540	Cadherin-related [Source:UniProtKB/TrEMBL;Acc:G4VH62]	_	_
SmVG_015979:Smp_192490	2.22786	2.32329	2.43467	1.84324	1.08936	0.660499	1.01554	1.70335	-0.982387	0.0004	0.00171395	1.86905	1.78844	1.80949	1.65727	0.401619	0.62472	0.292944	0.868474	-1.02269	3.74265e-06	3.05016e-05	1.21115	1.14986	1.10371	1.08232	0.269456	0.45952	0.216476	0.516307	-0.842682	0.000344139	0.00110841		cadherin;Smp_192490	Putative cadherin [Source:UniProtKB/TrEMBL;Acc:G4VH61]	gi|14277675|ref|NP_002579.2|	protocadherin gamma-C3 isoform 1 precursor [Homo sapiens]
Smp_049580	10.9024	15.3918	12.8997	10.4185	6.11307	5.22632	5.821	7.99613	-0.979772	5e-05	0.000268034	12.8141	8.49356	10.4438	9.35344	2.23553	3.42739	2.62402	3.82822	-0.907606	1.79878e-15	8.99621e-14	7.38277	4.93244	5.9207	5.57251	1.15935	1.92874	1.327	1.9629	-1.09793	6.02197e-11	9.72702e-10	GO:0003676,GO:0005622,GO:0008270,GO:0046872,GO:0005576,GO:0009405,GO:0019871	zinc finger protein;Smp_049580	Putative zinc finger protein [Source:UniProtKB/TrEMBL;Acc:G4V982]	_	_
Smp_050250	75.3985	94.4748	89.8965	103.278	35.9338	43.6112	50.3916	54.2001	-0.979382	5e-05	0.000268034	75.5484	58.9623	69.8456	89.787	12.8215	28.9098	20.8961	26.7294	-0.778542	3.65645e-11	8.6273e-10	45.9965	36.4915	42.0717	56.6831	7.40599	17.6069	11.9225	15.1664	-1.03891	4.57239e-11	7.60027e-10		hypothetical protein;Smp_050250	Putative uncharacterized protein [Source:UniProtKB/TrEMBL;Acc:G4LWK3]	_	_
Smp_147220	16.4475	18.5089	17.2002	15.845	8.45166	6.61461	8.50181	10.9326	-0.978947	5e-05	0.000268034	16.9889	13.7537	15.313	15.8242	3.15515	5.38261	3.40841	5.89574	-0.936777	9.74044e-21	8.83661e-19	10.1565	8.45416	9.04115	9.80947	1.79098	3.22754	1.87473	3.1814	-1.11814	1.14313e-13	3.20414e-12	GO:0005515	formin binding protein 1;Smp_147220	Formin binding protein and related proteins [Source:UniProtKB/TrEMBL;Acc:G4VCP3]	gi|38524622|ref|NP_055848.1|	formin-binding protein 1 [Homo sapiens]
Smp_198050	5.73441	9.16766	7.25102	4.74582	3.21726	4.47543	2.99529	2.97436	-0.977343	5e-05	0.000268034	8.67986	5.76261	7.09222	5.28983	1.53427	2.47302	2.86166	1.94301	-0.724031	2.25757e-06	1.93555e-05	5.23109	3.42487	4.12743	3.2578	0.837378	1.34845	1.54149	0.986112	-0.954276	1.67262e-05	7.71512e-05	GO:0003779,GO:0005515,GO:0051015	filamin;Smp_198050	Filamin-related [Source:UniProtKB/TrEMBL;Acc:G4VHV6]	gi|116805322|ref|NP_001449.3|	filamin-C isoform a [Homo sapiens]
Smp_213420	2.25126	2.73522	3.46359	3.72842	1.26257	1.52811	2.04675	1.35301	-0.976223	0.0124	0.0313909	2.32876	1.81187	2.98843	3.27357	0.445061	1.32675	0.838952	0.645161	-0.636697	0.00524883	0.0168617	1.27964	1.00262	1.61414	1.86655	0.23858	0.718837	0.413184	0.331862	-0.956065	0.000183587	0.000634417	GO:0000077,GO:0006281,GO:0030896	mitotic and DNA damage checkpoint protein hus1;Smp_213420
Smp_031190	10.8997	13.4525	12.4847	13.7407	6.45348	6.53911	4.93421	7.81802	-0.974217	5e-05	0.000268034	16.0278	12.1542	14.5259	17.2526	3.52848	4.22877	4.65325	5.09942	-0.790721	8.27761e-10	1.52796e-08	9.21075	7.04486	8.25472	10.3271	1.83439	2.36576	2.34796	2.63447	-1.09233	1.31229e-11	2.43626e-10	GO:0006629,GO:0008374,GO:0016740,GO:0016746	phospholipase A;Smp_031190	Phosphatidylcholine-sterol acyltransferase (Lecithin-cholesterol acyltransferase)/ Phospholipase A [Source:UniProtKB/TrEMBL;Acc:G4VPL3]	gi|6912484|ref|NP_036452.1|	group XV phospholipase A2 precursor [Homo sapiens]
SmVG_012328:Smp_013310	5.22449	8.5609	7.14657	5.54296	3.50876	2.14522	2.99389	4.83486	-0.973512	0.00035	0.00152055	12.9502	7.92167	10.0373	9.47488	2.52445	3.76968	2.68929	4.82729	-0.795689	6.08512e-08	7.48834e-07	7.7925	4.88598	5.93295	5.92007	1.4219	2.23015	1.48494	2.62476	-0.86858	4.63137e-06	2.45054e-05		hypothetical protein;Smp_013310	Putative uncharacterized protein [Source:UniProtKB/TrEMBL;Acc:G4VEH7]	_	_
SmVG_012328:Smp_129350	5.22449	8.5609	7.14657	5.54296	3.50876	2.14522	2.99389	4.83486	-0.973512	0.00035	0.00152055	12.9502	7.92167	10.0373	9.47488	2.52445	3.76968	2.68929	4.82729	-0.795689	6.08512e-08	7.48834e-07	7.7925	4.88598	5.93295	5.92007	1.4219	2.23015	1.48494	2.62476	-0.86858	4.63137e-06	2.45054e-05		ras and EF hand domain containing protein;Smp_129350	Putative rab [Source:UniProtKB/TrEMBL;Acc:G4VEH6]	gi|190358517|ref|NP_004209.2|	ras-related protein Rab-11B [Homo sapiens]
Smp_199380	2.09334	2.64281	1.81191	1.94067	0.573827	1.46783	1.37136	0.910728	-0.97327	0.00025	0.00113276	3.01281	2.04549	1.86994	2.44909	0.322572	1.04785	1.01474	0.732058	-0.728928	0.0134405	0.0369381	1.78002	1.27247	1.10553	1.55921	0.189929	0.572982	0.55136	0.388352	-0.97873	0.000112026	0.000413089		hypothetical protein;Smp_199380
SmVG_019971:Smp_080700.3	23.8654	25.3305	25.0307	21.41	10.8697	10.1684	11.5764	16.1305	-0.972308	5e-05	0.000268034	24.4992	20.8627	22.5205	22.0982	4.61687	7.33183	5.77502	8.67243	-0.924064	2.03421e-29	4.49177e-27	14.247	12.2695	12.8874	13.2767	2.46285	4.20138	2.98948	4.52031	-1.11362	2.33516e-15	8.7081e-14		jnk:sapk associated protein;Smp_080700.3
SmVG_019971:Smp_080700.4	23.8654	25.3305	25.0307	21.41	10.8697	10.1684	11.5764	16.1305	-0.972308	5e-05	0.000268034	24.4992	20.8627	22.5205	22.0982	4.61687	7.33183	5.77502	8.67243	-0.924064	2.03421e-29	4.49177e-27	14.247	12.2695	12.8874	13.2767	2.46285	4.20138	2.98948	4.52031	-1.11362	2.33516e-15	8.7081e-14		jnk:sapk associated protein;Smp_080700.4
SmVG_019971:Smp_165660	23.8654	25.3305	25.0307	21.41	10.8697	10.1684	11.5764	16.1305	-0.972308	5e-05	0.000268034	24.4992	20.8627	22.5205	22.0982	4.61687	7.33183	5.77502	8.67243	-0.924064	2.03421e-29	4.49177e-27	14.247	12.2695	12.8874	13.2767	2.46285	4.20138	2.98948	4.52031	-1.11362	2.33516e-15	8.7081e-14		polycystic kidney disease 2 1 protein like;Smp_165660
Smp_146010	15.5703	16.5077	20.1905	21.1614	8.01145	9.86724	9.83884	9.71033	-0.972256	5e-05	0.000268034	15.955	14.6736	18.1595	21.4678	3.50383	6.65358	5.93451	5.40511	-0.701917	9.55437e-12	2.52404e-10	9.12705	8.33178	10.0849	12.4746	1.82332	3.6622	2.95224	2.63726	-1.03708	1.36688e-13	3.74559e-12	GO:0003824,GO:0004222,GO:0005739,GO:0008152,GO:0008270,GO:0016485,GO:0043171,GO:0046872,GO:0051603	insulysin unit 3 (M16 family);Smp_146010	Putative m16 family peptidase [Source:UniProtKB/TrEMBL;Acc:G4VDA2]	gi|155969707|ref|NP_004960.2|	insulin-degrading enzyme isoform 1 precursor [Homo sapiens]
Smp_127810	11.3915	11.9296	15.8148	11.4317	5.81023	5.80338	5.66809	8.51445	-0.971056	5e-05	0.000268034	12.3383	10.2395	14.6247	10.5917	2.25359	3.1422	2.76164	4.32661	-1.08172	8.07633e-24	1.15265e-21	6.86871	5.92071	8.21958	6.75821	1.33354	2.05824	1.67166	2.52156	-1.07752	5.88681e-10	7.74404e-09	GO:0005515,GO:0016020,GO:0016021	cell adhesion molecule:down regulated by;Smp_127810	Putative uncharacterized protein [Source:UniProtKB/TrEMBL;Acc:G4VMN7]	_	_
Smp_035160	4.1365	5.36367	3.56095	4.78518	1.71605	1.46991	1.93452	3.98528	-0.970774	0.00335	0.0106099	6.17818	5.45945	3.75858	5.19172	0.980355	1.55407	1.27354	2.68436	-0.914456	0.00070023	0.00303623	3.55696	3.1941	2.16398	3.20834	0.488654	0.881329	0.593494	1.3673	-0.993936	0.000838056	0.00241858	GO:0005216,GO:0005244,GO:0005249,GO:0005250,GO:0005251,GO:0005267,GO:0005515,GO:0006810,GO:0006811,GO:0006813,GO:0008076,GO:0016020,GO:0016021,GO:0034765,GO:0051260,GO:0055085,GO:0071805	potassium voltage gated channel subfamily D;Smp_035160	Putative voltage-gated potassium channel [Source:UniProtKB/TrEMBL;Acc:G4V811]	gi|4826784|ref|NP_004966.1|	potassium voltage-gated channel subfamily B member 1 [Homo sapiens]
Smp_135280	72.4463	67.8675	69.9817	72.1634	27.5426	32.5959	38.0062	46.165	-0.968872	5e-05	0.000268034	55.1851	57.2554	55.9593	64.3181	10.5936	22.8143	16.8558	23.0517	-0.822848	4.94259e-20	4.07346e-18	31.2498	32.6457	31.0546	37.585	5.46215	12.6078	8.34035	11.5611	-1.02825	3.21717e-11	5.49674e-10	GO:0005086,GO:0005488,GO:0005802,GO:0016192,GO:0032012,GO:0043547	brefeldin A inhibited guanine;Smp_135280	Putative brefeldin A-inhibited guanine nucleotide-exchange protein [Source:UniProtKB/TrEMBL;Acc:G4VQ77]	gi|150417986|ref|NP_006411.2|	brefeldin A-inhibited guanine nucleotide-exchange protein 2 [Homo sapiens]
Smp_173030	4.71273	6.37711	5.38026	3.90827	3.25734	1.53113	1.8754	3.75325	-0.968081	0.00035	0.00152055	6.73246	4.96504	6.11125	4.90068	1.35367	1.44671	0.972411	2.35067	-1.1086	1.6625e-08	2.26762e-07	4.0301	3.01359	3.5794	3.09916	0.740885	0.84709	0.529495	1.30511	-1.18668	6.8268e-06	3.47017e-05	GO:0004177,GO:0005737,GO:0005886,GO:0006508,GO:0008237,GO:0008270,GO:0042277,GO:0043171,GO:0070006	aminopeptidase A (M01 family);Smp_173030	Aminopeptidase A (M01 family) [Source:UniProtKB/TrEMBL;Acc:G4V857]	gi|61742777|ref|NP_005566.2|	leucyl-cystinyl aminopeptidase isoform 1 [Homo sapiens]
Smp_118190	26.1761	36.4006	35.4935	39.7587	7.01381	21.6768	20.4418	21.3382	-0.967784	0.00045	0.00189572	82.6554	42.7364	70.4795	75.275	9.56139	25.761	23.4268	21.1732	-0.757023	0.00439437	0.014507	54.8055	30.5246	46.8059	54.3638	5.08841	14.8215	12.1224	10.7023	-1.24552	2.40983e-07	1.75459e-06	GO:0003676,GO:0016788	staphylococcal nuclease domain containing protein;Smp_118190
Smp_179660	22.1847	24.5675	26.1576	22.4096	8.49225	9.88375	10.7364	19.7422	-0.964274	5e-05	0.000268034	20.3336	17.7728	21.2693	19.8082	3.32625	6.54201	5.18957	9.70401	-0.971426	3.01345e-30	6.9198e-28	11.6414	10.1695	11.868	11.6522	1.72423	3.64351	2.56145	4.9323	-1.0288	2.29532e-06	1.3195e-05	GO:0016020,GO:0016021	hypothetical protein;note=predicted by EVM2;note=tmhmm%3B%3Bquery 1-905%3B;note=%3Bquery 85-137%3B;note=%3Bquery 467-485%3B;note=%3Bquery 860-905%3B;note=%3Bquery 62-84%3B;note=%3Bquery 138-160%3B;note=%3Bquery 444-466%3B;note=%3Bquery 486-508%3B;note=%3Bquery 837-859%3B;note=%3Bquery 1-61%3B;note=%3Bquery 161-443%3B;note=%3Bquery 509-836%3B;Smp_179660	Putative uncharacterized protein [Source:UniProtKB/TrEMBL;Acc:G4VDS9]	_	_
Smp_155180	10.9534	14.0598	12.7368	11.9517	2.53822	5.42913	7.31316	10.2036	-0.9637	0.00015	0.000719901	21.5685	14.6594	19.7604	21.0959	4.02042	8.61746	5.8448	9.35079	-0.680822	1.59375e-05	0.000110263	18.2518	12.2097	15.5823	16.9245	2.86558	6.78472	4.09575	6.80948	-0.812054	9.59154e-05	0.000359872	GO:0019905	beta taxilin;note=pfam_scan%3BPfam:PF09728.4%3B%3BE()%3D1.4E-33%3Bscore%3D116.2%3Bqu ery 19-188%3Bdescription%3DTaxilin;note=iprscan%3BInterPro:IPR019132 : Taxilin%3BPfam:PF09728%3B%3Bscore%3D1.9E-7%3Bquery 4-189%3Bdescription%3DTaxilin;Smp_155180	Putative beta-taxilin [Source:UniProtKB/TrEMBL;Acc:G4VKK0]	gi|222537714|ref|NP_694967.3|	beta-taxilin [Homo sapiens]
SmVG_015995:Smp_050540	2.7061	3.01412	3.44549	3.37466	1.37836	1.67017	1.54008	1.84508	-0.962861	0.0205	0.047996	3.59269	3.34399	4.14298	4.70316	1.01376	1.70855	1.4551	1.54168	-0.560715	2.24999e-07	2.3765e-06	2.06984	1.93467	2.33807	2.77269	0.548116	0.99277	0.730082	0.786404	-0.771623	2.91144e-09	3.32067e-08		uridine 5' monophosphate synthase;Smp_050540	Orotidine 5'-phosphate decarboxylase [Source:UniProtKB/TrEMBL;Acc:G4VH85]	gi|4507835|ref|NP_000364.1|	uridine 5'-monophosphate synthase [Homo sapiens]
SmVG_015995:Smp_149210	2.7061	3.01412	3.44549	3.37466	1.37836	1.67017	1.54008	1.84508	-0.962861	0.0205	0.047996	3.59269	3.34399	4.14298	4.70316	1.01376	1.70855	1.4551	1.54168	-0.560715	2.24999e-07	2.3765e-06	2.06984	1.93467	2.33807	2.77269	0.548116	0.99277	0.730082	0.786404	-0.771623	2.91144e-09	3.32067e-08		hypothetical protein;Smp_149210	Putative uncharacterized protein [Source:UniProtKB/TrEMBL;Acc:G4VH84]	_	_
Smp_176010	2.39401	3.44876	4.71738	4.25165	1.76306	2.20294	2.01848	1.6194	-0.96194	5e-05	0.000268034	3.0328	2.04097	4.01121	4.19091	0.687629	1.33506	1.35322	0.926239	-0.559149	0.0115975	0.0326264	1.70796	1.15095	2.22435	2.43709	0.346792	0.728343	0.663994	0.462695	-0.973266	0.00012189	0.000445064	GO:0005488	cytoskeleton associated protein 5;Smp_176010	Putative uncharacterized protein [Source:UniProtKB/TrEMBL;Acc:C1M0R1]	gi|57164942|ref|NP_001008938.1|	cytoskeleton-associated protein 5 isoform a [Homo sapiens]
Smp_126180	17.521	23.3574	21.3288	18.4877	11.7016	9.88844	8.95547	10.8956	-0.961415	5e-05	0.000268034	24.6512	17.9662	22.0549	20.5924	6.09733	7.46473	7.0837	7.21361	-0.693591	5.05783e-10	9.68768e-09	14.1033	10.1693	12.1728	11.9254	3.11707	4.11692	3.54667	3.51324	-0.906859	8.02211e-11	1.25558e-09		hypothetical protein;Smp_126180.2	Putative uncharacterized protein [Source:UniProtKB/TrEMBL;Acc:G4VPN5]	_	_
Smp_133270	49.9933	50.6507	54.3729	48.7487	22.4212	27.8624	25.2163	29.312	-0.959107	5e-05	0.000268034	54.0373	51.7903	55.9173	55.7221	11.7424	20.3129	19.6595	19.2231	-0.730206	3.24529e-19	2.41909e-17	30.647	29.6917	31.2398	32.7373	6.08625	11.3296	9.9967	9.85497	-0.945287	1.13274e-15	4.4363e-14	GO:0016020,GO:0016021	protein sel 1 1;Smp_133270	Sel-1-like protein, sel-1l [Source:UniProtKB/TrEMBL;Acc:G4V8B5]	gi|151301150|ref|NP_079505.1|	protein sel-1 homolog 2 precursor [Homo sapiens]
Smp_154920	6.58903	8.22123	8.97209	7.1298	3.73066	2.65385	3.71023	5.82529	-0.957332	0.0214	0.0497043	10.4076	7.93895	10.1193	9.80261	1.94365	3.32642	2.00228	4.10563	-0.951921	4.97422e-14	1.99361e-12	5.9812	4.56279	5.66206	5.80454	1.01146	1.8387	1.00036	2.06338	-1.07829	1.77868e-08	1.67461e-07	GO:0005085,GO:0005622,GO:0007264,GO:0043547,GO:0051056	ral guanine nucleotide dissociation stimulator;Smp_154920	Putative ral guanine nucleotide dissociation stimulator,ralgds [Source:UniProtKB/TrEMBL;Acc:G4VBQ7]	_	_
Smp_020480	18.4504	18.2333	19.2647	20.0299	7.88785	11.9658	10.2855	9.01373	-0.956467	5e-05	0.000268034	14.819	14.2385	15.3386	17.7609	2.92379	6.25746	6.25141	4.37636	-0.679318	1.02751e-06	9.49169e-06	8.71369	8.46161	8.73156	10.6225	1.53475	3.45149	3.03755	2.24969	-1.01374	8.53926e-12	1.66457e-10		hypothetical protein;Smp_020480	Putative uncharacterized protein [Source:UniProtKB/TrEMBL;Acc:C4Q2Q3]	_	_
Smp_198330	7.03015	8.79316	9.4794	9.35141	3.46668	4.20206	4.50267	5.68703	-0.95642	5e-05	0.000268034	8.94265	7.08247	9.17031	9.87557	1.69185	3.37665	2.73486	3.38851	-0.769743	7.03413e-14	2.77173e-12	5.17016	4.13051	5.18512	5.92412	0.905186	1.90724	1.39894	1.74347	-0.996469	1.45584e-11	2.67381e-10		zinc finger protein 291;Smp_198330	Putative uncharacterized protein [Source:UniProtKB/TrEMBL;Acc:G4VN47]	gi|225579092|ref|NP_065894.2|	S phase cyclin A-associated protein in the endoplasmic reticulum isoform a [Homo sapiens]
Smp_127820	18.7205	24.0171	28.2611	26.2251	8.47035	12.3237	12.4264	16.9072	-0.955703	5e-05	0.000268034	26.6126	20.0254	31.4094	30.8392	4.63988	9.00207	7.00406	11.2377	-0.911749	6.09435e-11	1.39847e-09	14.6078	11.0278	16.7008	17.3211	2.22896	5.13842	3.34972	5.48721	-1.07062	7.47485e-08	6.08849e-07	GO:0016020,GO:0016021	hypothetical protein;Smp_127820	Putative uncharacterized protein [Source:UniProtKB/TrEMBL;Acc:G4VMP0]	_	_
Smp_145110	2.828	3.13738	3.91888	3.85901	1.28477	1.8532	1.83309	2.13405	-0.951797	5e-05	0.000268034	3.13471	2.6161	3.676	3.92926	0.604673	1.44724	1.3184	1.32468	-0.6479	0.000272721	0.00134386	1.78481	1.49344	2.04767	2.30637	0.313644	0.780009	0.643122	0.662278	-0.869641	2.99996e-05	0.000128718	GO:0016020,GO:0016021	hypothetical protein;Smp_145110	Putative uncharacterized protein [Source:UniProtKB/TrEMBL;Acc:G4M0R7]	_	_
Smp_151120	19.1578	17.8331	18.8974	24.2172	8.25135	9.08262	12.2203	11.8763	-0.951206	5e-05	0.000268034	17.6174	18.1576	18.277	25.6354	4.19326	9.45419	5.71104	7.773	-0.64855	1.37525e-08	1.9298e-07	10.3242	10.7596	10.4027	15.4956	2.11417	5.2684	2.9234	3.94742	-0.932149	8.84738e-09	9.13165e-08	GO:0005887,GO:0016020,GO:0016021,GO:0022841,GO:0030322,GO:0071805	potassium channel subfamily K;Smp_151120	Twik family of potassium channels-related [Source:UniProtKB/TrEMBL;Acc:G4LYK1]	_	_
Smp_163630	8.01836	13.2307	10.5201	5.82526	5.27354	4.96729	3.36836	5.85731	-0.949527	0.0034	0.010745	39.0696	22.4179	34.5294	15.7682	8.08336	6.14324	8.14951	9.76003	-0.972434	0.000243942	0.00122107	24.8532	14.4255	21.2524	10.2486	4.82741	3.6469	4.67138	5.62617	-1.06864	0.000950197	0.00269327		developmentally regulated antigen 10;MEG-4 (10.3) family;Smp_163630.2	MEG-4 (10.3) family [Source:UniProtKB/TrEMBL;Acc:G4V7K7]	_	_
Smp_142210	8.71453	10.8001	8.30307	8.35851	4.10611	3.81944	4.65511	6.15154	-0.949522	5e-05	0.000268034	12.7274	9.80261	9.75023	11.1448	2.43272	4.12549	3.12038	4.82067	-0.781822	1.9586e-12	5.74473e-11	7.40904	5.7643	5.59346	6.74628	1.29891	2.37539	1.5978	2.52704	-0.920317	2.37222e-08	2.16367e-07	GO:0005515,GO:0005768,GO:0006904,GO:0007032,GO:0007040,GO:0008270,GO:0030674,GO:0030897,GO:0035542	vacuolar protein sorting associated protein 18;Smp_142210
Smp_143730	21.3797	21.1274	25.0383	23.6777	8.47236	12.3445	12.555	13.8763	-0.949144	5e-05	0.000268034	17.8256	17.4368	20.8225	21.7586	3.45205	7.83793	6.53993	7.23378	-0.763941	5.45619e-09	8.35782e-08	9.90386	9.74283	11.2715	12.4764	1.70043	4.20277	3.09379	3.46697	-0.991267	1.16069e-10	1.7496e-09	GO:0004180,GO:0006508,GO:0016020,GO:0016021,GO:0030246	nodal modulator 1;Smp_143730	Putative carboxypeptidase regulatory region-containing [Source:UniProtKB/TrEMBL;Acc:G4VSS4]	gi|51944953|ref|NP_055102.3|	nodal modulator 1 precursor [Homo sapiens]
Smp_007570	3.62773	4.9161	3.59342	3.86386	0.666319	3.30354	1.33318	2.99231	-0.947798	0.007	0.0196467	5.21899	4.37618	4.60275	5.96981	0.349464	1.21877	1.92909	1.72395	-1.12558	0.00437763	0.014464	3.07181	2.56599	2.61754	3.55935	0.185759	0.693141	0.991974	0.898516	-1.28965	3.89567e-05	0.000162515		hypothetical protein;Smp_007570	Putative uncharacterized protein [Source:UniProtKB/TrEMBL;Acc:G4M021]	_	_
Smp_166640	11.3979	15.8229	14.6786	13.3383	5.2115	6.17875	6.47687	10.8094	-0.945786	5e-05	0.000268034	12.9007	9.00948	11.8202	11.9403	1.94163	3.7941	3.108	5.25445	-0.931319	2.9159e-15	1.39781e-13	7.54159	5.33332	6.77714	7.22336	1.04737	2.19956	1.60652	2.74008	-1.05134	2.55747e-07	1.84797e-06	GO:0005622,GO:0005737,GO:0007165,GO:0007166,GO:0016020,GO:0016021,GO:0043087	rho GTPase activating protein 20;Smp_166640	Putative uncharacterized protein [Source:UniProtKB/TrEMBL;Acc:G4VM76]	_	_
SmVG_002255	3.27493	3.15112	3.66092	4.81848	1.49227	2.04952	1.83315	2.3686	-0.944776	5e-05	0.000268034	2.35385	2.53124	2.45642	3.94594	0.582299	1.06817	1.13353	1.16805	-0.576642	3.55531e-05	0.000224786	1.37374	1.44711	1.62814	2.43617	0.299608	0.638834	0.531703	0.574504	-0.939772	1.81018e-06	1.06124e-05
Smp_111980	97.2045	101.943	98.574	106.854	35.769	67.8378	32.5257	74.082	-0.944545	0.0002	0.000928806	110.141	103.248	99.9543	120.675	20.2986	28.2595	44.4688	50.9964	-0.792697	2.69874e-05	0.000175269	116.363	106.68	105.077	135.879	19.3335	30.2464	45.0535	48.1211	-0.888362	5.29679e-05	0.000212989		hypothetical protein;note=predicted by EVM2;Smp_111980	Putative uncharacterized protein [Source:UniProtKB/TrEMBL;Acc:G4VID9]	_	_
Smp_084010	12.9526	17.1938	11.7735	10.7771	6.30918	5.24865	6.41174	9.47397	-0.941254	5e-05	0.000268034	15.0674	10.8245	10.1353	10.3187	2.70168	4.27965	2.71014	4.9751	-0.880097	1.70745e-09	2.92566e-08	8.73886	6.29619	5.77387	6.13827	1.39607	2.40077	1.35627	2.56087	-0.994446	1.51391e-06	9.09937e-06	GO:0016020,GO:0016021	hypothetical protein;Smp_084010	Putative uncharacterized protein [Source:UniProtKB/TrEMBL;Acc:G4VRF1]	_	_
Smp_149390	3.7069	4.54899	4.00553	3.40997	1.52072	1.69826	1.9723	2.98854	-0.937993	5e-05	0.000268034	3.96526	3.06618	3.42132	3.27718	0.658458	1.2517	0.929442	1.54308	-0.896832	2.23454e-13	7.92449e-12	2.31886	1.80575	1.96207	1.97797	0.350322	0.732708	0.497761	0.800858	-0.988557	1.11636e-07	8.76031e-07	GO:0007154,GO:0016021,GO:0030246	fras1 related extracellular matrix protein;Smp_149390	Fras1 related extracellular matrix protein [Source:UniProtKB/TrEMBL;Acc:G4VMJ6]	_	_
Smp_160080	18.8857	22.0073	19.5333	20.4486	9.38466	8.40175	10.6975	13.737	-0.937735	5e-05	0.000268034	21.2648	18.0287	18.7589	21.3068	6.27446	9.3611	6.77123	8.61263	-0.527622	3.08618e-09	4.94084e-08	12.4648	10.6092	10.7953	12.951	3.37029	5.3746	3.49048	4.49479	-0.690538	3.29119e-10	4.51657e-09	GO:0016020,GO:0016021	hypothetical protein;Smp_160080.2	Putative uncharacterized protein [Source:UniProtKB/TrEMBL;Acc:G4VK54]	_	_
SmVG_008896	6.15782	3.77786	3.76841	3.50976	0.662141	3.33006	1.19358	3.80971	-0.936295	0.00195	0.00669424	3.59778	5.20216	3.42772	3.4275	0.257973	0.855063	1.87018	2.03378	-1.20904	0.0147603	0.039949	2.03359	2.9402	1.92031	1.98827	0.126759	0.461834	0.901802	1.00357	-1.00862	0.016512	0.0325422
Smp_212210	56.6488	79.0976	69.8296	74.2156	30.1438	34.2869	35.8434	46.0481	-0.935205	5e-05	0.000268034	98.6212	64.5835	83.4991	92.5687	15.3087	30.2865	23.2412	30.7831	-0.816593	6.83368e-11	1.54391e-09	57.5597	37.7531	47.7508	55.4158	8.19908	17.5657	12.4696	16.2686	-1.04703	2.44994e-09	2.83961e-08	GO:0003746,GO:0006414	chromatin specific transcription elongation;Smp_212210	Chromatin-specific transcription elongation factor 140 kDa subunit (M24 family) [Source:UniProtKB/TrEMBL;Acc:G4M1N3]	gi|6005757|ref|NP_009123.1|	FACT complex subunit SPT16 [Homo sapiens]
Smp_102190	26.3898	29.7192	23.4772	32.0258	10.5093	12.4128	16.3109	19.1399	-0.935121	5e-05	0.000268034	14.9788	15.1494	14.2153	21.1303	3.45218	7.67485	4.49702	6.30458	-0.623176	0.00141416	0.00554993	14.5063	13.1148	11.5836	19.0541	2.57427	5.71528	3.35371	4.14548	-0.946305	6.34626e-07	4.15828e-06	GO:0016491,GO:0030539,GO:0047045,GO:0055114,GO:0061370	steroid dehydrogenase;Smp_102190	_	gi|4557649|ref|NP_000188.1|	testosterone 17-beta-dehydrogenase 3 [Homo sapiens]
Smp_174490	29.1485	31.1442	27.2798	27.7664	13.2285	11.5497	15.7595	19.8049	-0.934629	5e-05	0.000268034	33.3878	27.7804	27.2696	29.401	5.93972	11.1221	6.85061	11.8831	-0.906005	2.4301e-18	1.73411e-16	18.9416	15.9005	15.0041	17.1963	2.94842	6.10713	3.33943	5.88928	-1.07378	7.9955e-11	1.2537e-09	GO:0016020,GO:0016021	hypothetical protein;Smp_174490	Putative uncharacterized protein [Source:UniProtKB/TrEMBL;Acc:G4LZT0]	_	_
SmVG_000011:Smp_173020	3.16728	3.25245	2.91801	2.70163	1.09202	1.50324	1.8251	1.88096	-0.934034	5e-05	0.000268034	3.00927	2.79013	2.61559	2.60895	0.614558	1.25574	0.841148	1.15699	-0.737822	3.48454e-07	3.52764e-06	1.82856	1.72412	1.5392	1.65217	0.342436	0.742318	0.47593	0.634517	-0.828763	7.98827e-07	5.10167e-06		goodpasture antigen binding protein kinase;Smp_173020	Putative goodpasture antigen-binding protein [Source:UniProtKB/TrEMBL;Acc:G4V5B5]	gi|194294543|ref|NP_001123577.1|	collagen type IV alpha-3-binding protein isoform 3 [Homo sapiens]
SmVG_000011:Smp_200370	3.16728	3.25245	2.91801	2.70163	1.09202	1.50324	1.8251	1.88096	-0.934034	5e-05	0.000268034	3.00927	2.79013	2.61559	2.60895	0.614558	1.25574	0.841148	1.15699	-0.737822	3.48454e-07	3.52764e-06	1.82856	1.72412	1.5392	1.65217	0.342436	0.742318	0.47593	0.634517	-0.828763	7.98827e-07	5.10167e-06		hypothetical protein;Smp_200370
Smp_128810	23.8905	29.546	26.9953	23.5931	13.1146	10.4774	12.9884	17.8693	-0.933934	5e-05	0.000268034	24.5012	19.5419	22.1041	21.3377	4.77164	7.48189	5.54476	8.80889	-0.888573	1.77293e-22	1.97606e-20	14.17	11.3649	12.4929	12.7181	2.49311	4.1697	2.77086	4.47052	-1.05516	1.23999e-12	2.89004e-11	GO:0005789,GO:0006506,GO:0016020,GO:0016021,GO:0016758	gpi mannosyltransferase 1;Smp_128810	Putative uncharacterized protein [Source:UniProtKB/TrEMBL;Acc:G4VC51]	gi|21553315|ref|NP_660150.1|	GPI mannosyltransferase 1 [Homo sapiens]
Smp_143690	27.9223	31.6408	31.1004	30.0743	13.1271	12.7801	15.6791	21.6452	-0.933161	5e-05	0.000268034	27.4628	23.3538	26.3938	29.4135	5.6409	9.98116	6.80177	11.7831	-0.82667	6.72829e-23	8.37672e-21	16.4793	13.9431	15.1082	17.7234	2.67218	5.353	3.44211	5.84656	-1.05731	1.87028e-10	2.66468e-09	GO:0016020,GO:0016021,GO:0055085	feline leukemia virus subgroup C;Smp_143690	Feline leukemia virus subgroup C receptor-related [Source:UniProtKB/TrEMBL;Acc:G4VKF9]	gi|190341091|ref|NP_060261.2|	feline leukemia virus subgroup C receptor-related protein 2 isoform 1 [Homo sapiens]
Smp_125160	7.74887	8.72627	9.16611	7.74364	4.43097	3.55122	3.78138	5.73697	-0.931797	5e-05	0.000268034	7.18338	5.77069	7.06642	6.70159	1.19909	1.84121	1.2424	2.46373	-1.12185	1.11709e-24	1.67606e-22	4.0821	3.35846	4.03007	3.97477	0.804497	1.194	0.838009	1.36177	-1.08839	2.056e-12	4.54492e-11	GO:0004930,GO:0005515,GO:0007166,GO:0007186,GO:0016020,GO:0016021,GO:0017147,GO:0035567,GO:0042813,GO:0060070	smoothened;Smp_125160	_	_	_
Smp_136710	20.7	29.9894	25.6067	18.9247	12.6159	8.42074	10.725	18.1835	-0.930935	5e-05	0.000268034	29.9705	20.0553	25.3062	21.4605	6.16571	8.38298	5.56476	10.6633	-0.886074	1.10625e-08	1.58463e-07	17.1947	11.5779	14.2369	12.6764	3.22128	4.70553	2.80939	5.43434	-0.981784	4.55667e-07	3.09442e-06	GO:0000166,GO:0005388,GO:0005524,GO:0005887,GO:0006810,GO:0006811,GO:0006812,GO:0006816,GO:0006874,GO:0016020,GO:0016021,GO:0016787,GO:0019829,GO:0033017,GO:0046872,GO:0070588,GO:0005783	calcium transporting atpase;Smp_136710	Putative calcium-transporting atpase sarcoplasmic/endoplasmic reticulum type (Calcium pump) [Source:UniProtKB/TrEMBL;Acc:G4VFY5]	gi|10835220|ref|NP_004311.1|	sarcoplasmic/endoplasmic reticulum calcium ATPase 1 isoform a [Homo sapiens]
Smp_075390	5.82485	6.98573	4.97942	4.33411	3.33394	1.50137	2.73991	4.04127	-0.929446	0.00065	0.00259941	5.53454	4.13723	3.71807	3.61772	1.02681	1.46291	0.778708	1.70238	-0.973223	2.48539e-05	0.000163316	3.09915	2.38749	2.15193	2.25705	0.582555	0.885873	0.396383	0.917539	-1.00022	7.317e-05	0.000282948		hypothetical protein;note=predicted by EVM2;Smp_075390	Putative uncharacterized protein [Source:UniProtKB/TrEMBL;Acc:G4LX26]	_	_
Smp_133550	2.81747	2.29699	1.96355	1.79643	1.08695	0.989476	1.04353	1.54158	-0.92885	0.00985	0.0259563	2.09588	2.49744	1.69529	1.62209	0.437708	0.611486	0.527646	0.831649	-0.938061	8.20276e-07	7.6859e-06	1.25242	1.50206	1.00837	1.03345	0.242556	0.376172	0.287787	0.443283	-1.05478	1.16618e-05	5.62244e-05	GO:0004871,GO:0004930,GO:0004983,GO:0005887,GO:0007165,GO:0007166,GO:0007186,GO:0007218,GO:0016020,GO:0016021	neuropeptide receptor type%3B neuropeptide ff receptor;Smp_133550	Putative neuropeptide F-like receptor [Source:UniProtKB/TrEMBL;Acc:G4VQD0]	gi|149944554|ref|NP_001043.2|	somatostatin receptor type 4 [Homo sapiens]
Smp_045360	14.0254	18.3682	19.1454	12.143	7.83436	7.07683	7.2936	11.2751	-0.92759	5e-05	0.000268034	16.7903	12.0557	16.844	11.4897	2.6791	3.57171	3.19702	5.22433	-1.13479	9.47097e-23	1.15457e-20	9.52818	6.70337	9.16593	6.59618	1.48162	2.33238	1.79133	2.73725	-1.13339	3.84056e-09	4.25038e-08		calsyntenin 2;Smp_045360.3	Putative uncharacterized protein [Source:UniProtKB/TrEMBL;Acc:G4VBR3]	gi|57242755|ref|NP_055759.3|	calsyntenin-1 isoform 2 [Homo sapiens]
Smp_084090	5.18895	6.88424	4.70742	4.08254	3.32053	2.37008	1.89819	3.38144	-0.927361	5e-05	0.000268034	7.62465	5.33991	4.9721	4.55004	1.79081	1.61363	1.66753	2.20191	-0.809238	8.61471e-05	0.000493964	4.34788	3.06524	2.73286	2.67384	0.922379	0.867864	0.816578	1.0885	-0.95392	2.4711e-05	0.00010897	GO:0016020,GO:0016021	hypothetical protein;Smp_084090	Putative junctophilin [Source:UniProtKB/TrEMBL;Acc:G4VRF7]	gi|21704283|ref|NP_065706.2|	junctophilin-3 [Homo sapiens]
Smp_154680	2.39267	2.79205	2.09605	2.13877	1.59543	0.882123	0.801391	1.67486	-0.927119	0.01785	0.0425426	3.08865	2.6681	2.58184	2.61346	1.04962	0.626454	0.68156	1.09251	-0.823972	0.00460556	0.0150891	1.87981	1.56142	1.46287	1.71275	0.574488	0.386655	0.334267	0.573275	-0.960519	0.000762194	0.00222813	GO:0003829,GO:0008375,GO:0016020,GO:0016021,GO:0016740,GO:0016757	glycosyltransferase 14 family member;Smp_154680	Putative glycosyltransferase 14 family member [Source:UniProtKB/TrEMBL;Acc:G4V6I0]	gi|21717810|ref|NP_663624.1|	N-acetyllactosaminide beta-1,6-N-acetylglucosaminyl-transferase isoform A [Homo sapiens]
Smp_013040	369.922	375.217	388.546	337.892	207.82	176.43	165.754	225.431	-0.924286	5e-05	0.000268034	389.787	430.268	397.89	380.755	102.16	129.002	135.56	143.501	-0.766417	5.1459e-15	2.38978e-13	250.017	272.81	248.647	251.31	55.906	75.4802	72.1997	78.4525	-1.02057	1.31946e-13	3.66247e-12	GO:0004190,GO:0005764,GO:0006508,GO:0008233,GO:0016787	cathepsin d (lysosomal aspartyl protease);Smp_013040.2	Cathepsin D (A01 family) [Source:UniProtKB/TrEMBL;Acc:G4VEV6]	gi|4503143|ref|NP_001900.1|	cathepsin D preproprotein [Homo sapiens]
Smp_158950	3.02494	3.33295	3.66786	4.31763	1.00753	2.4092	1.95914	2.1884	-0.923114	0.0009	0.00344646	3.83955	3.32588	4.02473	5.48008	0.649964	1.7011	1.5404	1.42264	-0.686179	0.000645029	0.00283043	2.13965	1.85081	2.18201	3.09611	0.279148	0.803188	0.739272	0.694695	-1.07789	1.10483e-05	5.35376e-05	GO:0004672,GO:0004674,GO:0005524,GO:0005634,GO:0005737,GO:0006468,GO:0016301,GO:0016310,GO:0016772,GO:0035556	serine:threonine protein kinase haspin;Smp_158950	Kinase, putative [Source:UniProtKB/TrEMBL;Acc:G4LZY5]	gi|56790919|ref|NP_114171.2|	serine/threonine-protein kinase haspin [Homo sapiens]
SmVG_015105	3.28853	3.78475	3.84552	2.9439	1.6946	2.21591	1.39979	2.00132	-0.922947	5e-05	0.000268034	3.76935	3.1124	3.68996	3.10601	0.783251	1.08925	1.28381	1.19757	-0.788663	7.58428e-08	9.11282e-07	2.05846	1.71233	1.97736	1.74273	0.394962	0.601603	0.613093	0.566541	-0.967724	4.3084e-08	3.69901e-07
Smp_007330	15.5779	17.4889	15.4555	12.9451	7.45232	9.01921	7.00045	8.95161	-0.922778	5e-05	0.000268034	19.5895	16.9357	17.287	15.8988	4.467	5.92534	6.69682	6.31031	-0.72053	4.46059e-14	1.81258e-12	11.1136	9.69407	9.58407	9.29657	2.26303	3.25187	3.28202	3.15286	-0.904996	3.18455e-11	5.45188e-10		hypothetical protein;Smp_007330	Putative uncharacterized protein [Source:UniProtKB/TrEMBL;Acc:G4VB01]	_	_
SmVG_035997	10.3035	14.9704	18.3479	7.69017	6.31722	9.27465	5.88054	5.60149	-0.922393	5e-05	0.000268034	19.9619	10.7149	19.3059	8.44336	2.84062	4.55529	5.96124	3.49068	-0.863934	0.000339674	0.00162585	12.7491	6.63267	11.8923	5.60232	1.72834	2.70655	3.26482	2.06919	-1.12437	0.000476697	0.00147604
Smp_001390	10.0806	11.6485	11.6373	9.86193	4.60931	4.47813	5.66473	8.07102	-0.921476	5e-05	0.000268034	9.68499	8.12016	9.50141	9.10416	2.04626	4.0346	2.74281	4.1593	-0.726555	1.15888e-09	2.0549e-08	5.50139	4.63383	5.30041	5.34226	1.02056	2.24868	1.38065	2.13161	-0.833283	1.08951e-06	6.8011e-06		nck associated protein 1;Smp_001390	Putative uncharacterized protein [Source:UniProtKB/TrEMBL;Acc:G4VDW3]	gi|34485727|ref|NP_005328.2|	nck-associated protein 1-like isoform 1 [Homo sapiens]
Smp_131890	19.9963	23.3579	22.4829	20.47	8.57701	13.1555	10.3409	13.5565	-0.919499	5e-05	0.000268034	24.81	20.3918	23.0952	23.1719	3.85242	7.18305	8.00893	8.6144	-0.88464	1.39952e-10	2.99974e-09	14.2725	11.8049	12.9916	13.7946	2.01988	4.05454	4.04445	4.40346	-1.07805	1.30912e-10	1.94936e-09	GO:0005215,GO:0005328,GO:0005887,GO:0006810,GO:0006836,GO:0015293,GO:0016020,GO:0016021,GO:0055085	sodium:chloride dependent transporter;Smp_131890	Transporter [Source:UniProtKB/TrEMBL;Acc:G4VP60]	gi|92859670|ref|NP_004202.2|	sodium- and chloride-dependent glycine transporter 2 [Homo sapiens]
SmVG_031401:Smp_076500	4.80621	5.72242	5.75324	4.05632	2.79069	2.45137	2.33459	3.1852	-0.918266	5e-05	0.000268034	6.03434	4.9449	6.11514	4.80442	1.48873	1.91212	1.84426	2.11599	-0.750389	2.42261e-17	1.53253e-15	3.46773	2.87874	3.47255	2.86081	0.781862	1.09156	0.931843	1.09722	-0.905209	5.82033e-11	9.47266e-10		dystrophin%2Cs A:C:F:G:H;Smp_076500	Dystrophin-like protein [Source:UniProtKB/TrEMBL;Acc:G4LZH2]	gi|5032311|ref|NP_004013.1|	dystrophin Dp140ab isoform [Homo sapiens]
SmVG_031401:Smp_163360	4.80621	5.72242	5.75324	4.05632	2.79069	2.45137	2.33459	3.1852	-0.918266	5e-05	0.000268034	6.03434	4.9449	6.11514	4.80442	1.48873	1.91212	1.84426	2.11599	-0.750389	2.42261e-17	1.53253e-15	3.46773	2.87874	3.47255	2.86081	0.781862	1.09156	0.931843	1.09722	-0.905209	5.82033e-11	9.47266e-10		dystrophin;Smp_163360	Dystrophin, putative [Source:UniProtKB/TrEMBL;Acc:G4LZH1]	gi|5032283|ref|NP_003997.1|	dystrophin Dp427m isoform [Homo sapiens]
SmVG_031401:Smp_187280	4.80621	5.72242	5.75324	4.05632	2.79069	2.45137	2.33459	3.1852	-0.918266	5e-05	0.000268034	6.03434	4.9449	6.11514	4.80442	1.48873	1.91212	1.84426	2.11599	-0.750389	2.42261e-17	1.53253e-15	3.46773	2.87874	3.47255	2.86081	0.781862	1.09156	0.931843	1.09722	-0.905209	5.82033e-11	9.47266e-10		hypothetical protein;Smp_187280	Putative uncharacterized protein [Source:UniProtKB/TrEMBL;Acc:G4LZH3]	_	_
Smp_164450	40.182	37.2392	36.843	37.729	17.0959	20.3051	19.4004	23.7073	-0.916791	5e-05	0.000268034	49.2154	47.6444	46.1831	49.8585	9.97721	16.997	14.722	16.9986	-0.816259	1.04437e-22	1.23458e-20	28.0398	27.1338	25.6552	29.1342	5.02909	9.27725	7.14942	8.42256	-1.05662	2.14829e-20	1.7061e-18	GO:0005515	tether containing UBX domain for GLUT4;Smp_164450	Putative uncharacterized protein [Source:UniProtKB/TrEMBL;Acc:G4LZ46]	_	_
Smp_175640	20.4124	20.2625	24.1304	22.8354	7.55042	11.0294	12.0871	15.7572	-0.916725	5e-05	0.000268034	18.3011	17.6801	21.0803	21.9231	3.29349	7.8951	6.24506	8.51295	-0.81201	5.3148e-09	8.17335e-08	10.2362	10.0044	11.5262	12.6118	1.55528	4.12416	2.93936	4.0541	-1.02432	2.98931e-08	2.67913e-07	GO:0008140,GO:0051289	hypothetical protein;note=predicted by EVM2;note=pfam_scan%3BPfam:PF12884.2%3B%3BE()%3D7.0E-16%3Bscore%3D58.2%3Bque ry 10-66%3Bdescription%3DTORC_N;Smp_175640
Smp_157820	3.34049	3.21966	2.92378	3.00491	1.06017	1.46398	2.10316	1.99459	-0.915325	5e-05	0.000268034	3.64066	3.54129	3.32007	3.68008	0.697258	1.6889	1.08241	1.42972	-0.736938	2.92242e-09	4.71739e-08	2.11431	2.10085	1.92926	2.27329	0.382072	0.993031	0.580401	0.75972	-0.866346	7.15747e-08	5.86338e-07	GO:0000077,GO:0000166,GO:0000723,GO:0004674,GO:0005506,GO:0005515,GO:0005524,GO:0005634,GO:0006281,GO:0006974,GO:0010212,GO:0015671,GO:0016301,GO:0016310,GO:0016572,GO:0016740,GO:0016772,GO:0016773,GO:0019825,GO:0020037,GO:0090399	serine protein kinase ATM;Smp_157820	Putative ataxia telangiectasia mutated (Atm) [Source:UniProtKB/TrEMBL;Acc:G4VP28]	gi|71902540|ref|NP_000042.3|	serine-protein kinase ATM [Homo sapiens]
Smp_129840	4.50559	5.14892	5.53593	4.81891	2.52696	2.04697	2.51431	3.53592	-0.913328	5e-05	0.000268034	4.59641	3.78217	4.67506	4.69958	1.01367	1.58983	1.07795	1.85914	-0.843966	9.45182e-09	1.38096e-07	2.59703	2.14669	2.58868	2.72856	0.507327	0.871333	0.524519	0.931281	-1.01017	3.04731e-08	2.72542e-07	GO:0016020,GO:0016021	hypothetical protein;Smp_129840	Putative uncharacterized protein [Source:UniProtKB/TrEMBL;Acc:G4V8S7]	_	_
Smp_020340	1.4086	1.98611	2.07913	1.31231	0.715171	1.17568	0.665495	1.04787	-0.912904	0.00015	0.000719901	2.49829	1.9258	2.41908	1.77243	0.514491	0.540756	0.882997	0.897959	-0.848182	4.22316e-05	0.000261917	1.55138	1.22268	1.46246	1.18638	0.317976	0.439033	0.540995	0.504664	-0.762147	0.000290227	0.000959628	GO:0000023,GO:0003824,GO:0004553,GO:0004558,GO:0005975,GO:0008152,GO:0016787,GO:0016798,GO:0030246,GO:0032450	alpha glucosidase;Smp_020340	Putative alpha-glucosidase [Source:UniProtKB/TrEMBL;Acc:G4V8C4]	gi|221316699|ref|NP_004659.2|	maltase-glucoamylase, intestinal [Homo sapiens]
Smp_180790	8.49477	10.2076	8.91528	9.79319	5.1682	3.75751	5.0102	5.96268	-0.910792	5e-05	0.000268034	9.03622	7.18438	7.59942	9.2103	1.96466	3.08793	2.34866	3.07978	-0.744054	1.39294e-10	2.99112e-09	5.22903	4.15318	4.37403	5.48586	1.02706	1.73099	1.18807	1.57319	-0.99566	3.17472e-13	8.25138e-12	GO:0016020,GO:0016021	hypothetical protein;Smp_180790	Putative uncharacterized protein [Source:UniProtKB/TrEMBL;Acc:G4VJV8]	_	_
Smp_149260	1.96957	3.78833	3.0935	3.07273	1.08885	1.7752	1.63845	1.84702	-0.909163	5e-05	0.000268034	4.81708	2.49288	3.9745	4.239	0.700436	1.70709	1.67131	1.41408	-0.618457	0.0144793	0.0393888	2.82748	1.46759	2.35652	2.68497	0.361289	0.956667	0.86032	0.706937	-0.896824	0.000254588	0.000854638	GO:0000166,GO:0003777,GO:0005524,GO:0005871,GO:0005874,GO:0005875,GO:0007018,GO:0007059,GO:0008017,GO:0008574,GO:0090307	kinesin family 1;Smp_149260	Putative kinesin eg-5 [Source:UniProtKB/TrEMBL;Acc:G4VI97]	gi|13699824|ref|NP_004514.2|	kinesin-like protein KIF11 [Homo sapiens]
Smp_201600	3.15469	3.64855	2.81008	2.8059	2.20872	1.43295	1.26463	1.70827	-0.908857	0.00025	0.00113276	4.93902	4.37771	4.16577	3.73209	1.56616	1.2198	1.00331	1.33094	-0.842815	0.000554825	0.00249639	2.92082	2.61676	2.46036	2.27977	0.824582	0.708736	0.551005	0.689437	-1.03115	7.18353e-06	3.63929e-05		hypothetical protein;note=trans_spliced (SO:0000870);note=tmhmm%3B%3Bquery 1-131%3B;note=%3Bquery 24-131%3B;note=%3Bquery 4-23%3B;note=%3Bquery 1-3%3B;Smp_201600	Putative uncharacterized protein Smp_201600 [Source:UniProtKB/TrEMBL;Acc:G4VCZ2]	_	_
Smp_144930	12.3161	16.0889	15.3442	12.7398	7.39748	6.63255	7.95139	8.11361	-0.908446	0.0032	0.0102236	15.5614	12.1281	15.1432	14.6386	4.32409	6.48756	5.00657	5.06483	-0.567167	2.72518e-09	4.42955e-08	9.12478	7.13354	8.66642	8.94305	2.30923	3.8353	2.59271	2.61482	-0.769383	8.36344e-11	1.30424e-09	GO:0002098,GO:0006355,GO:0016301,GO:0016310,GO:0033588	elongator complex protein 1;Smp_144930	Putative ikappab kinase complex-associated protein [Source:UniProtKB/TrEMBL;Acc:G4VJR0]	gi|38569394|ref|NP_003631.2|	elongator complex protein 1 [Homo sapiens]
Smp_211150	13.4841	16.2664	15.7104	13.1946	7.30077	6.72554	7.72676	9.51789	-0.907443	5e-05	0.000268034	12.9081	10.3794	12.2392	11.3373	2.5841	4.57988	3.41686	4.36207	-0.796504	5.58089e-14	2.20652e-12	7.49812	6.10699	7.03116	6.81483	1.40118	2.65033	1.78625	2.32416	-0.939688	2.63921e-12	5.75993e-11	GO:0004386,GO:0005515	MAGUK p55 subfamily;Smp_211150	ATP-dependent RNA helicase, putative [Source:UniProtKB/TrEMBL;Acc:G4LUN8]	gi|111154074|ref|NP_775767.2|	MAGUK p55 subfamily member 7 [Homo sapiens]
Smp_201130	4.39264	5.76323	4.70599	4.35387	2.44347	1.60403	2.83324	3.36378	-0.907436	0.0008	0.0031153	5.27393	4.27548	4.55408	4.63928	1.07652	2.01214	1.1945	1.70163	-0.770345	0.000323014	0.00156015	3.15423	2.64148	2.70412	2.86922	0.568081	1.20194	0.680454	0.906355	-0.917323	8.08267e-06	4.06122e-05	GO:0016020,GO:0016021	hypothetical protein;note=tmhmm%3B%3Bquery 1-225%3B;note=%3Bquery 1-59%3B;note=%3Bquery 138-143%3B;note=%3Bquery 189-225%3B;note=%3Bquery 60-82%3B;note=%3Bquery 115-137%3B;note=%3Bquery 144-166%3B;note=%3Bquery 171-188%3B;note=%3Bquery 83-114%3B;note=%3Bquery 167-170%3B;Smp_201130
Smp_170510	27.6856	32.0095	34.9572	32.1912	16.7155	13.2571	16.6581	21.0943	-0.905292	5e-05	0.000268034	27.7513	22.912	29.8316	29.9119	6.6063	10.3437	7.04934	10.9566	-0.78865	1.62237e-14	6.95478e-13	15.7545	13.1674	16.6266	17.6523	3.41925	5.73557	3.51573	5.54691	-0.997153	2.81831e-12	6.11965e-11	GO:0005488,GO:0005634,GO:0010265,GO:0016567	cullin associated;Smp_170510	Tip120, putative [Source:UniProtKB/TrEMBL;Acc:G4M1G1]	gi|21361794|ref|NP_060918.2|	cullin-associated NEDD8-dissociated protein 1 [Homo sapiens]
Smp_165440	6.76399	7.01223	8.19029	8.05108	3.62237	3.48996	3.88532	5.044	-0.903986	5e-05	0.000268034	8.25233	7.43363	8.95027	10.2245	2.06708	3.36883	2.58855	3.30701	-0.701737	6.73321e-10	1.26078e-08	4.62918	4.20096	4.92505	5.94287	1.03988	1.82685	1.26318	1.65427	-0.952786	3.9568e-12	8.40036e-11	GO:0005515,GO:0007165	netrin receptor unc 5;Smp_165440	Putative netrin receptor unc5 [Source:UniProtKB/TrEMBL;Acc:G4VTP5]	gi|32261318|ref|NP_734465.2|	netrin receptor UNC5B precursor [Homo sapiens]
Smp_125820	23.4746	26.6907	25.3554	26.5157	11.9929	12.12	14.5467	15.8738	-0.903871	5e-05	0.000268034	22.024	18.4889	20.2602	24.0334	4.28112	8.60803	6.17225	8.03775	-0.758999	1.79102e-16	1.01749e-14	12.8387	10.9119	11.6703	14.4785	2.26119	4.87093	3.14549	4.16706	-0.998403	3.74057e-14	1.12178e-12		hypothetical protein;note=predicted by EVM2;note=trans_spliced (SO:0000870);Smp_125820	Putative uncharacterized protein [Source:UniProtKB/TrEMBL;Acc:G4V9W1]	_	_
Smp_204390	5.30051	5.66177	5.73756	4.79158	3.54073	1.5343	3.45349	3.00039	-0.898504	5e-05	0.000268034	4.25777	3.86197	4.22494	3.91607	1.32839	2.11451	0.777404	1.4654	-0.716269	0.00901763	0.0264561	2.46699	2.27616	2.45185	2.36871	0.725429	1.23625	0.395983	0.788728	-0.815381	0.000375424	0.00119614		hypothetical protein;Smp_204390	Putative uncharacterized protein Smp_204390 [Source:UniProtKB/TrEMBL;Acc:G4LX22]	_	_
Smp_131690	8.12314	9.2641	8.98328	10.5083	4.31708	5.10567	4.37135	6.00316	-0.897492	5e-05	0.000268034	10.1435	8.17543	9.26908	12.4067	1.99652	3.33108	2.98832	3.88902	-0.780969	6.18922e-12	1.69235e-10	5.88613	4.83434	5.35734	7.42226	1.07312	1.89836	1.51968	2.03598	-1.04502	1.99806e-11	3.54078e-10	GO:0004672,GO:0005515,GO:0005524,GO:0006468,GO:0016740,GO:0016772	peripheral plasma membrane protein CASK;Smp_131690	MAGUK homolog [Source:UniProtKB/TrEMBL;Acc:G4VE93]	_	_
Smp_194840	801.995	767.184	854.774	721.072	374.782	486.369	315.9	519.718	-0.890281	5e-05	0.000268034	1422.17	1324.65	1458.14	1336.9	335.065	359.258	508.541	525.576	-0.806616	3.54417e-07	3.57256e-06	804.533	752.183	808.468	778.119	168.944	196.823	247.385	260.269	-0.964297	2.68808e-08	2.42436e-07		Niemann Pick C2 protein;Smp_194840	Niemann pick c2 (NPC2) [Source:UniProtKB/TrEMBL;Acc:G4VTW3]	gi|5453678|ref|NP_006423.1|	epididymal secretory protein E1 precursor [Homo sapiens]
SmVG_014790	16.2441	19.4127	23.6067	21.4901	8.12902	10.8434	10.7836	13.834	-0.889532	5e-05	0.000268034	29.4847	22.8402	34.3769	33.4131	5.98867	12.0277	10.9437	12.9139	-0.676959	4.6102e-06	3.6803e-05	17.6646	13.7583	20.0833	20.4399	3.28818	6.90043	5.52423	6.6714	-0.840186	5.5126e-07	3.64827e-06
Smp_149130	6.3848	8.36029	6.60723	5.92959	3.72052	2.89345	2.79174	5.33032	-0.888598	5e-05	0.000268034	7.96542	5.83887	5.93936	5.96443	1.5078	1.89791	1.6279	2.92046	-0.918109	6.15663e-09	9.36945e-08	4.54916	3.36822	3.30974	3.48802	0.757678	1.02798	0.809461	1.45722	-1.01778	5.12194e-06	2.67545e-05	GO:0003779,GO:0005509,GO:0005515	fimbrin:plastin;Smp_149130	Putative fimbrin/plastin [Source:UniProtKB/TrEMBL;Acc:G4VH98]	gi|167614506|ref|NP_002289.2|	plastin-2 [Homo sapiens]
Smp_097500	5.23232	6.15052	4.99289	4.9362	2.65784	2.29839	2.79208	3.76791	-0.887994	5e-05	0.000268034	5.07148	4.25159	4.1497	4.58343	1.12485	1.83347	1.63274	1.89809	-0.658179	2.70447e-08	3.60073e-07	2.86394	2.37102	2.25096	2.54536	0.554196	0.966093	0.728267	0.940505	-0.844144	1.45883e-08	1.41223e-07	GO:0005515	hypothetical protein;Smp_097500	Putative uncharacterized protein [Source:UniProtKB/TrEMBL;Acc:G4LUA4]	_	_
SmVG_001354:Smp_214180	30.6233	41.5696	35.442	26.0525	17.6134	12.0064	15.7467	26.8922	-0.88762	5e-05	0.000268034	42.6671	29.454	34.7526	27.8866	8.07286	11.5876	7.82494	16.3456	-0.927574	5.19134e-12	1.43288e-10	24.4248	16.9953	19.5845	16.4798	4.15713	6.49185	3.90052	8.32412	-0.960876	1.10805e-05	5.36632e-05		calpain;Smp_214180
SmVG_001354:Smp_214190	30.6233	41.5696	35.442	26.0525	17.6134	12.0064	15.7467	26.8922	-0.88762	5e-05	0.000268034	42.6671	29.454	34.7526	27.8866	8.07286	11.5876	7.82494	16.3456	-0.927574	5.19134e-12	1.43288e-10	24.4248	16.9953	19.5845	16.4798	4.15713	6.49185	3.90052	8.32412	-0.960876	1.10805e-05	5.36632e-05		calpain;Smp_214190
Smp_072660	28.0615	26.6368	29.9646	35.2387	11.8843	14.9166	16.5074	21.5132	-0.887309	5e-05	0.000268034	24.4198	24.0796	26.3761	34.7004	4.11077	10.2654	7.57729	10.6527	-0.85808	4.00924e-10	7.84617e-09	14.1089	13.9988	14.6444	20.4435	2.38087	5.68371	3.8851	5.59098	-1.07174	2.12639e-09	2.50179e-08	GO:0005096,GO:0005515,GO:0005622,GO:0005737,GO:0007165,GO:0031235,GO:0043087,GO:0043547,GO:0046580,GO:0051056	ras GTPase activating protein 1;Smp_072660	Ras gtpase activating protein, putative [Source:UniProtKB/TrEMBL;Acc:G4LXY0]	_	_
Smp_044060	2.33969	2.75439	2.09891	2.75264	1.47867	1.36666	1.20256	1.33472	-0.885758	0.0003	0.00132569	2.72417	2.34642	2.26853	3.10293	0.62582	0.842636	0.912952	0.784981	-0.694201	0.000137655	0.00074102	1.62113	1.37034	1.31099	1.91518	0.334541	0.487409	0.472662	0.423318	-1.04331	4.60357e-08	3.9406e-07	GO:0003824,GO:0004114,GO:0007165,GO:0008081,GO:0008152,GO:0016787,GO:0046872	high affinity cAMP specific and IBMX insensitive;Smp_044060	Putative camp-specific cyclic nucleotide phosphodiesterase [Source:UniProtKB/TrEMBL;Acc:G4VD32]	gi|27734721|ref|NP_002596.1|	high affinity cAMP-specific and IBMX-insensitive 3',5'-cyclic phosphodiesterase 8A isoform 1 [Homo sapiens]
Smp_042020	19.6423	28.0479	25.3849	18.9799	13.3243	8.2078	11.6076	16.7668	-0.883271	5e-05	0.000268034	21.7903	14.292	19.9002	15.8647	4.6025	6.16928	3.97472	7.61583	-0.897642	2.22087e-07	2.35211e-06	13.0039	8.53897	11.6145	9.7733	2.53745	3.59282	2.10481	4.03182	-1.0112	2.92397e-07	2.07779e-06	GO:0016020,GO:0016021,GO:0016787	ectonucleoside triphosphate diphosphohydrolase;Smp_042020	ATP-diphosphohydrolase 1; Putative atp-diphosphohydrolase 1 [Source:UniProtKB/TrEMBL;Acc:Q7YTA4]	_	_
Smp_180900	2.40627	2.35162	2.06083	2.13954	0.905388	1.28466	1.22924	1.44148	-0.882034	0.0001	0.000501375	2.49418	2.35938	2.25906	2.35933	0.54739	1.00619	0.919761	0.931368	-0.65288	1.90907e-05	0.000129518	1.42636	1.34369	1.25382	1.43227	0.302128	0.589168	0.474332	0.484364	-0.767911	1.58079e-06	9.4418e-06	GO:0000166	80 kDa MCM3 associated protein;Smp_180900	Putative uncharacterized protein [Source:UniProtKB/TrEMBL;Acc:G4VE37]	gi|19923191|ref|NP_003897.2|	80 kDa MCM3-associated protein [Homo sapiens]
Smp_157690	6.89583	7.82789	8.60448	5.82809	4.0307	3.19885	3.82464	4.80069	-0.87888	5e-05	0.000268034	8.1543	7.31368	8.8076	6.84513	2.566	3.55234	2.52207	3.50086	-0.610445	1.92115e-09	3.24902e-08	4.6927	4.25124	4.98204	4.08302	1.34213	1.99173	1.27437	1.80389	-0.697965	8.09475e-07	5.16176e-06	GO:0005515,GO:0006508,GO:0008233	von Willebrand factor type A;Smp_157690	Putative von Willebrand factor type A domain-containing protein [Source:UniProtKB/TrEMBL;Acc:G4VPB0]	_	_
Smp_128350	10.5632	11.0939	10.6575	11.238	3.89027	5.89459	6.44871	7.44999	-0.878875	5e-05	0.000268034	9.75645	8.67846	9.01024	10.5855	1.45861	3.89092	3.01265	3.86519	-0.826281	2.96763e-07	3.04918e-06	5.67759	5.11048	5.16779	6.39809	0.780038	2.22927	1.57143	2.04827	-0.989078	3.4031e-07	2.38273e-06	GO:0000122,GO:0003700,GO:0005634,GO:0005737,GO:0048869,GO:0003676,GO:0005622,GO:0008270,GO:0046872	PR domain zinc finger protein 1;Smp_128350	Putative uncharacterized protein [Source:UniProtKB/TrEMBL;Acc:G4VS90]	gi|21389599|ref|NP_653295.1|	zinc finger protein 570 [Homo sapiens]
Smp_058190	12.1057	11.3168	12.3955	10.9436	4.29524	7.8489	6.02996	7.26173	-0.878459	5e-05	0.000268034	22.8752	22.9198	22.3697	23.8162	4.22261	8.36172	8.73871	8.58262	-0.765607	1.37582e-09	2.39958e-08	13.2987	13.3973	12.8004	14.4118	2.2221	4.7955	4.46665	4.42375	-0.960723	1.74178e-09	2.07778e-08		IQ domain containing protein G;note=predicted by EVM2;note=trans_spliced (SO:0000870);Smp_058190	Putative dna double-strand break repair rad50 ATPase [Source:UniProtKB/TrEMBL;Acc:G4VNM8]	gi|14165288|ref|NP_115639.1|	IQ domain-containing protein G [Homo sapiens]
Smp_078920	4.72993	7.32471	7.24511	8.36037	2.59386	2.13367	5.29402	5.02965	-0.877929	5e-05	0.000268034	6.89344	4.30855	6.84271	8.40197	1.12921	3.46563	1.40724	2.90514	-0.7629	0.00515709	0.0166263	3.97261	2.50815	3.89354	4.99537	0.582542	1.96337	0.724716	1.49248	-0.944373	0.000601632	0.00180679	GO:0000793,GO:0000796,GO:0005488,GO:0005515,GO:0005737,GO:0007076	condensin complex subunit 3;Smp_078920	Putative uncharacterized protein [Source:UniProtKB/TrEMBL;Acc:G4LYV7]	gi|21359945|ref|NP_071741.2|	condensin complex subunit 3 [Homo sapiens]
Smp_130300	18.9476	21.3731	25.5298	20.7635	10.0664	11.8778	10.2863	14.9789	-0.875522	5e-05	0.000268034	18.7707	16.0996	22.2041	19.746	3.9461	6.61293	6.3839	8.082	-0.799713	1.09152e-13	4.0752e-12	10.8661	9.20742	12.4407	11.543	2.02815	3.61939	3.12584	4.01566	-0.98658	3.72827e-10	5.06773e-09	GO:0000166,GO:0005391,GO:0005524,GO:0005887,GO:0006754,GO:0006810,GO:0006811,GO:0006812,GO:0006813,GO:0006814,GO:0006883,GO:0010107,GO:0010248,GO:0015077,GO:0015672,GO:0015991,GO:0016020,GO:0016021,GO:0016787,GO:0016820,GO:0019829,GO:0030007,GO:0036376,GO:0043231,GO:0046872	Na+:K+ ATPase alpha subunit;Smp_130300	Putative na+/k+ atpase alpha subunit [Source:UniProtKB/TrEMBL;Acc:G4VGA0]	gi|4502285|ref|NP_001672.1|	sarcoplasmic/endoplasmic reticulum calcium ATPase 2 isoform a [Homo sapiens]
SmVG_008325:Smp_146060	16.3125	22.4873	20.7803	16.8771	8.81509	9.43743	9.79493	13.6675	-0.874088	5e-05	0.000268034	21.723	16.2281	20.2599	18.8285	4.50416	8.39875	6.84185	9.1305	-0.671904	3.3011e-13	1.11656e-11	12.341	9.34531	11.3235	11.1119	2.32895	4.63959	3.39084	4.59741	-0.763043	2.17608e-07	1.60345e-06		Ral GTPase activating protein subunit alpha 1;Smp_146060	Putative tuberin [Source:UniProtKB/TrEMBL;Acc:G4VDA7]	gi|118600961|ref|NP_065076.2|	ral GTPase-activating protein subunit alpha-2 [Homo sapiens]
SmVG_008325:Smp_146070	16.3125	22.4873	20.7803	16.8771	8.81509	9.43743	9.79493	13.6675	-0.874088	5e-05	0.000268034	21.723	16.2281	20.2599	18.8285	4.50416	8.39875	6.84185	9.1305	-0.671904	3.3011e-13	1.11656e-11	12.341	9.34531	11.3235	11.1119	2.32895	4.63959	3.39084	4.59741	-0.763043	2.17608e-07	1.60345e-06		hypothetical protein;Smp_146070	Putative uncharacterized protein [Source:UniProtKB/TrEMBL;Acc:G4VDA8]	_	_
Smp_072870	17.4558	21.2398	21.0065	19.8892	10.6415	8.89553	11.0622	12.8875	-0.872035	5e-05	0.000268034	22.7945	17.7539	21.3248	21.8799	5.08352	8.68221	6.20512	8.5273	-0.707622	1.21805e-11	3.16073e-10	13.0759	10.2339	11.8405	12.9942	2.57714	4.85374	3.05482	4.30272	-0.880177	5.41114e-11	8.84151e-10	GO:0005869	alpha centractin;note=predicted by EVM2;note=pfam_scan%3BPfam:PF00022.14%3B%3BE()%3D6.3E-131%3Bscore%3D436.2%3B query 9-373%3Bdescription%3DActin;note=iprscan%3BInterPro:IPR004000 : Actin/actin-like%3BPfam:PF00022%3B%3Bscore%3D2.6E-178%3Bquery 6-375%3Bdescription%3DActin/actin-like;note=iprscan%3BInterPro:IPR004000 : Actin/actin-like%3BSMART:SM00268%3B%3Bscore%3D7.0E-192%3Bquery 9-375%3Bdescripti…
Smp_212490	12.6592	13.5136	14.0672	14.443	7.17175	6.59317	7.06759	9.05075	-0.871753	5e-05	0.000268034	12.9817	11.205	12.9754	13.9298	2.73223	4.44813	3.33133	4.9753	-0.845902	2.86082e-21	2.81346e-19	7.72164	6.85072	7.7011	8.82879	1.54723	2.85408	1.96551	2.76954	-0.964772	5.51607e-14	1.62025e-12	GO:0005515	protein transport protein Sec31A;Smp_212490	Sec31-related protein [Source:UniProtKB/TrEMBL;Acc:G4LYB3]	_	_
Smp_179690	10.3725	12.5826	12.4004	11.7681	5.91623	5.63646	6.95376	7.32661	-0.867234	5e-05	0.000268034	15.5312	11.534	14.3848	15.1109	3.02874	6.00848	4.35512	5.0028	-0.720247	2.73988e-10	5.54755e-09	9.31878	6.88873	8.34519	9.28009	1.65863	3.39264	2.28651	2.67444	-0.957472	3.97343e-12	8.41484e-11	GO:0005488,GO:0005635,GO:0005829,GO:0008565,GO:0042991	hypothetical protein;Smp_179690	Putative uncharacterized protein [Source:UniProtKB/TrEMBL;Acc:G4VGW0]	_	_
Smp_125200	4.71462	5.78751	5.42184	5.14525	3.35399	2.51838	2.31017	3.37384	-0.866447	0.00035	0.00152055	4.0311	3.23906	3.70072	3.8972	0.991369	1.21193	1.07281	1.47188	-0.762888	4.96943e-05	0.000303693	2.45755	1.97744	2.29447	2.43208	0.615699	0.724714	0.588115	0.804169	-0.919947	2.32733e-06	1.33433e-05	GO:0005215,GO:0005887,GO:0006810,GO:0006833,GO:0009992,GO:0015204,GO:0015250,GO:0015254,GO:0015793,GO:0016020,GO:0016021,GO:0034220,GO:0071918	Aquaporin 9 (AQP 9) (Small solute channel 1);note=pfam_scan%3BPfam:PF00230.15%3B%3BE()%3D2.4E-6%3Bscore%3D27.0%3Bque ry 43-122%3Bdescription%3DMIP;Smp_125200	Putative aquaglyceroporin [Source:UniProtKB/TrEMBL;Acc:G4V742]	gi|157266307|ref|NP_066190.2|	aquaporin-9 [Homo sapiens]
SmVG_020340:Smp_091650	31.1021	44.8202	46.5925	36.4305	20.8409	14.2238	19.1618	32.9684	-0.866213	5e-05	0.000268034	34.7392	24.0566	37.5841	32.7473	7.70056	11.4051	7.73502	16.9237	-0.844989	6.40061e-08	7.83539e-07	21.1228	14.3823	21.565	19.7753	4.04279	6.4704	3.92856	8.73579	-0.921195	4.08774e-05	0.000169374		phospholipid transporting ATPase IIB;Smp_091650	Putative cation-transporting ATPase [Source:UniProtKB/TrEMBL;Acc:G4VLN7]	gi|40316837|ref|NP_065185.1|	probable phospholipid-transporting ATPase ID isoform a [Homo sapiens]
SmVG_020340:Smp_091660	31.1021	44.8202	46.5925	36.4305	20.8409	14.2238	19.1618	32.9684	-0.866213	5e-05	0.000268034	34.7392	24.0566	37.5841	32.7473	7.70056	11.4051	7.73502	16.9237	-0.844989	6.40061e-08	7.83539e-07	21.1228	14.3823	21.565	19.7753	4.04279	6.4704	3.92856	8.73579	-0.921195	4.08774e-05	0.000169374		hypothetical protein;Smp_091660	Putative uncharacterized protein [Source:UniProtKB/TrEMBL;Acc:G4VLN6]	_	_
Smp_135420	2.2707	2.99448	2.50256	2.11546	1.59698	1.19263	1.39804	1.23497	-0.865988	5e-05	0.000268034	2.90935	2.19984	2.43374	2.30807	0.824523	1.217	0.827031	0.843594	-0.541523	0.000309392	0.00150491	1.6721	1.26529	1.36648	1.36167	0.426375	0.675525	0.413738	0.435074	-0.740011	2.84321e-05	0.00012288		hypothetical protein;note=predicted by EVM2;Smp_135420	Putative uncharacterized protein [Source:UniProtKB/TrEMBL;Acc:G4VQH3]	_	_
Smp_175590	10.9175	11.4419	10.5421	9.67343	7.40647	3.83429	5.44258	6.69139	-0.865055	5e-05	0.000268034	10.8365	9.44455	9.67826	9.77174	3.05492	3.47449	2.03982	3.55877	-0.834597	3.54913e-05	0.000224516	6.06789	5.29798	5.2723	5.62593	1.48188	1.85373	0.960944	1.71017	-1.02512	3.22213e-08	2.87278e-07	GO:0000166,GO:0004672,GO:0004713,GO:0005515,GO:0005524,GO:0006468,GO:0016020,GO:0016021,GO:0016301,GO:0016310,GO:0016740,GO:0016772,GO:0018108	proto oncogene tyrosine protein kinase receptor;note=pfam_scan%3BPfam:PF07714.12%3B%3BE()%3D5.0E-74%3Bscore%3D248.5%3Bq uery 583-879%3Bdescription%3DPkinase_Tyr;note=iprscan%3BInterPro:IPR001245 : Tyrosine protein kinase%3BPRINTS:PR00109%3B%3Bscore%3D9.3E-26%3Bquery 737-755%3Bdescription%3DTyrosine protein kinase;note=iprscan%3BInterPro:IPR001245 : Tyrosine protein kinase%3BSMART:SM00219%3B%3Bsco…	Tyrosine kinase [Source:UniProtKB/TrEMBL;Acc:G4V918]	gi|221316639|ref|NP_000132.3|	fibroblast growth factor receptor 2 isoform 1 precursor [Homo sapiens]
Smp_177280	6.52447	8.1014	7.466	6.75902	3.1079	4.09168	4.38834	4.26027	-0.864298	5e-05	0.000268034	11.056	8.33384	10.2632	10.4319	2.08622	4.52642	3.61436	3.97297	-0.668891	3.49043e-08	4.54883e-07	6.2547	4.72991	5.67935	6.15951	1.0362	2.47671	1.76091	1.95146	-0.850564	3.51601e-08	3.09618e-07	GO:0016020,GO:0016021	macoilin 1;Smp_177280	Tmem57 protein , putative [Source:UniProtKB/TrEMBL;Acc:C4QNP7]	gi|31542661|ref|NP_060672.2|	macoilin [Homo sapiens]
Smp_166170	10.6811	13.2501	9.52639	8.45334	4.20679	6.7982	4.1987	7.83986	-0.862964	5e-05	0.000268034	12.1661	10.0866	8.82954	9.10608	1.97144	3.46667	4.83465	5.17191	-0.729595	0.00042188	0.00196313	6.77342	5.52846	4.75453	5.08813	0.926557	1.8478	2.31617	2.44744	-0.748375	0.00125938	0.00342802		hypothetical protein;note=predicted by EVM2;Smp_166170	Putative uncharacterized protein [Source:UniProtKB/TrEMBL;Acc:G4VJI2]	_	_
Smp_021590	12.0802	14.6342	16.1116	18.6858	7.32393	7.88469	9.92258	8.70001	-0.86251	5e-05	0.000268034	17.1969	12.9287	18.042	22.6395	3.55317	8.09747	5.90565	5.93943	-0.609164	1.77197e-05	0.0001212	9.63829	7.33963	9.95508	13.1291	1.79537	4.41684	2.91187	3.0037	-0.922714	3.32113e-07	2.32914e-06	GO:0005622,GO:0005737,GO:0007165,GO:0035556,GO:0043087,GO:0046872	Rac GTPase activating protein 1;Smp_021590	Putative rac gtpase activating protein [Source:UniProtKB/TrEMBL;Acc:G4VNG7]	gi|21361397|ref|NP_037409.2|	rac GTPase-activating protein 1 [Homo sapiens]
SmVG_012771:Smp_015070	29.8073	34.7775	31.1292	27.6306	15.5864	13.975	16.509	21.7736	-0.862402	5e-05	0.000268034	44.4844	36.8641	38.8117	39.9124	8.51187	16.0529	12.1957	17.2364	-0.775666	2.7186e-21	2.69625e-19	25.3634	21.3727	21.657	23.645	4.52762	8.97024	6.22815	8.75307	-0.904597	1.474e-10	2.16111e-09		vacuolar atp synthase subunit h;Smp_015070	Putative vacuolar ATP synthase subunit h [Source:UniProtKB/TrEMBL;Acc:G4VGA9]	_	_
SmVG_012771:Smp_015070.2	29.8073	34.7775	31.1292	27.6306	15.5864	13.975	16.509	21.7736	-0.862402	5e-05	0.000268034	44.4844	36.8641	38.8117	39.9124	8.51187	16.0529	12.1957	17.2364	-0.775666	2.7186e-21	2.69625e-19	25.3634	21.3727	21.657	23.645	4.52762	8.97024	6.22815	8.75307	-0.904597	1.474e-10	2.16111e-09		vacuolar atp synthase subunit h;Smp_015070.2
SmVG_012771:Smp_117810	29.8073	34.7775	31.1292	27.6306	15.5864	13.975	16.509	21.7736	-0.862402	5e-05	0.000268034	44.4844	36.8641	38.8117	39.9124	8.51187	16.0529	12.1957	17.2364	-0.775666	2.7186e-21	2.69625e-19	25.3634	21.3727	21.657	23.645	4.52762	8.97024	6.22815	8.75307	-0.904597	1.474e-10	2.16111e-09		v type proton atpase subunit h;Smp_117810	Putative vacuolar ATP synthase subunit h [Source:UniProtKB/TrEMBL;Acc:G4VGB1]	gi|47717102|ref|NP_998785.1|	V-type proton ATPase subunit H isoform 1 [Homo sapiens]
SmVG_018828:Smp_057950	96.8133	104.789	121.647	108.463	49.361	55.1507	58.0834	74.9251	-0.86202	5e-05	0.000268034	114.492	101.275	128.135	124.468	25.8074	45.6741	38.0486	49.2634	-0.73157	4.76891e-16	2.57191e-14	63.4168	56.507	69.4432	71.4105	12.6143	24.3393	18.1346	23.9425	-0.909556	2.42188e-10	3.39419e-09		hypothetical protein;Smp_057950
SmVG_018828:Smp_153310	96.8133	104.789	121.647	108.463	49.361	55.1507	58.0834	74.9251	-0.86202	5e-05	0.000268034	114.492	101.275	128.135	124.468	25.8074	45.6741	38.0486	49.2634	-0.73157	4.76891e-16	2.57191e-14	63.4168	56.507	69.4432	71.4105	12.6143	24.3393	18.1346	23.9425	-0.909556	2.42188e-10	3.39419e-09		cell polarity protein%3B lethal giant larvae;Smp_153310	Cell polarity protein [Source:UniProtKB/TrEMBL;Acc:G4VK20]	gi|62912476|ref|NP_004131.3|	lethal(2) giant larvae protein homolog 1 [Homo sapiens]
SmVG_018828:Smp_153310.2	96.8133	104.789	121.647	108.463	49.361	55.1507	58.0834	74.9251	-0.86202	5e-05	0.000268034	114.492	101.275	128.135	124.468	25.8074	45.6741	38.0486	49.2634	-0.73157	4.76891e-16	2.57191e-14	63.4168	56.507	69.4432	71.4105	12.6143	24.3393	18.1346	23.9425	-0.909556	2.42188e-10	3.39419e-09		cell polarity protein%3B lethal giant larvae;Smp_153310.2
SmVG_018828:Smp_153320	96.8133	104.789	121.647	108.463	49.361	55.1507	58.0834	74.9251	-0.86202	5e-05	0.000268034	114.492	101.275	128.135	124.468	25.8074	45.6741	38.0486	49.2634	-0.73157	4.76891e-16	2.57191e-14	63.4168	56.507	69.4432	71.4105	12.6143	24.3393	18.1346	23.9425	-0.909556	2.42188e-10	3.39419e-09		lethal(2) giant larvae protein 2;Smp_153320	Putative uncharacterized protein [Source:UniProtKB/TrEMBL;Acc:G4VK22]	_	_
Smp_142620	2.81673	3.14128	3.70672	3.03028	1.59607	1.51863	1.67765	2.1943	-0.861588	5e-05	0.000268034	2.81555	2.45878	3.26762	2.97017	0.732087	1.19638	0.858476	1.20426	-0.700293	3.86733e-08	4.99551e-07	1.63034	1.4246	1.86699	1.77882	0.361328	0.672011	0.458266	0.616466	-0.875688	2.46052e-08	2.23086e-07	GO:0000166,GO:0004016,GO:0004383,GO:0004672,GO:0005524,GO:0005886,GO:0006182,GO:0006468,GO:0007165,GO:0008074,GO:0009190,GO:0016020,GO:0016021,GO:0016301,GO:0016310,GO:0016772,GO:0016829,GO:0016849,GO:0035556	atrial natriuretic peptide receptor 1;Smp_142620	Guanylate cyclase [Source:UniProtKB/TrEMBL;Acc:G4V651]	gi|167830411|ref|NP_000897.3|	atrial natriuretic peptide receptor 1 precursor [Homo sapiens]
Smp_036990	27.8662	34.8178	29.1072	24.5034	17.1706	10.9585	16.384	19.5288	-0.860696	5e-05	0.000268034	49.3433	33.2588	38.5005	33.3611	9.62283	14.812	8.40643	15.8587	-0.88022	2.51302e-07	2.62354e-06	27.717	18.6808	21.0047	19.1052	4.3549	7.42541	4.01603	7.6412	-1.08356	2.34816e-08	2.14944e-07	GO:0005515,GO:0005737,GO:0006897	sh domain grb%3B endophilin;Smp_036990	Sh3-containing grb2-like protein 3 (Endophilin III) [Source:UniProtKB/TrEMBL;Acc:G4LV14]	gi|9910352|ref|NP_064530.1|	endophilin-B2 [Homo sapiens]
SmVG_024852:Smp_130750	34.2638	33.7573	31.4633	34.8966	15.9125	14.5722	20.2838	23.2957	-0.859479	5e-05	0.000268034	45.2731	42.4675	39.2435	50.555	9.99521	19.7026	12.7365	18.6381	-0.701383	6.44595e-16	3.41344e-14	25.4516	24.1184	21.6002	29.3856	5.20918	10.9068	6.44456	9.2484	-0.866842	5.62414e-10	7.46722e-09		enhancer of mRNA decapping protein 4;Smp_130750	Putative uncharacterized protein [Source:UniProtKB/TrEMBL;Acc:G4VSM0]	gi|45827771|ref|NP_055144.3|	enhancer of mRNA-decapping protein 4 [Homo sapiens]
SmVG_024852:Smp_199990	34.2638	33.7573	31.4633	34.8966	15.9125	14.5722	20.2838	23.2957	-0.859479	5e-05	0.000268034	45.2731	42.4675	39.2435	50.555	9.99521	19.7026	12.7365	18.6381	-0.701383	6.44595e-16	3.41344e-14	25.4516	24.1184	21.6002	29.3856	5.20918	10.9068	6.44456	9.2484	-0.866842	5.62414e-10	7.46722e-09		enhancer of mRNA decapping protein 4;Smp_199990	Serine/threonine kinase [Source:UniProtKB/TrEMBL;Acc:G4VSL9]	gi|45827771|ref|NP_055144.3|	enhancer of mRNA-decapping protein 4 [Homo sapiens]
Smp_083430	45.7415	39.8289	37.0913	35.7991	6.90831	29.5009	15.7842	35.1465	-0.859414	5e-05	0.000268034	30.0556	33.0528	27.5897	29.5477	2.40886	8.28618	13.1722	14.424	-1.09977	0.00726958	0.0221149	18.6551	20.4942	16.8814	18.5419	1.20097	4.81115	7.09148	7.83501	-1.05377	0.00472601	0.0109762		hypothetical protein;Smp_083430	Putative uncharacterized protein [Source:UniProtKB/TrEMBL;Acc:G4LXJ0]	_	_
Smp_018870	6.80867	9.0799	7.99026	12.0318	4.62782	3.97321	5.98587	5.20725	-0.859337	0.00015	0.000719901	9.54021	6.5574	7.98207	13.9188	2.26375	4.12645	2.35786	3.15226	-0.595638	0.000138876	0.000746563	5.52689	3.81942	4.54378	8.30607	1.18096	2.31187	1.24622	1.61868	-0.982662	1.2122e-05	5.81164e-05		hypothetical protein;Smp_018870	Putative uncharacterized protein [Source:UniProtKB/TrEMBL;Acc:G4VG16]	_	_
Smp_148650	24.6632	23.6854	26.3722	23.8938	12.3969	13.7342	12.0153	16.2139	-0.859248	5e-05	0.000268034	19.2617	19.243	21.1489	21.2357	4.59231	7.23443	6.96361	8.02574	-0.740727	1.06946e-19	8.39989e-18	11.0593	11.1262	11.9284	12.5737	2.38393	4.03429	3.49264	4.11151	-0.940434	2.55056e-14	7.86913e-13	GO:0000045,GO:0000407,GO:0000422,GO:0006914,GO:0019898,GO:0044804	autophagy protein 2;Smp_148650	Putative uncharacterized protein [Source:UniProtKB/TrEMBL;Acc:G4V903]	_	_
SmVG_035601	9.52724	9.70397	7.47946	9.36117	3.84954	5.66135	5.12118	5.27163	-0.857837	0.0019	0.00654827	16.1255	12.7744	17.7505	19.0558	3.53875	8.83832	6.48948	9.0437	-0.495904	0.00371199	0.0126063	13.2597	10.9087	13.845	16.0538	2.72484	7.03787	4.52524	6.59905	-0.558658	0.00653513	0.0145325
Smp_105410	44.6488	71.2606	75.5026	56.8055	33.6303	22.7342	25.3168	55.3211	-0.857404	5e-05	0.000268034	71.0503	39.547	71.1803	58.816	13.9213	16.4119	13.6693	28.9466	-0.941865	9.6096e-06	7.06858e-05	39.9056	22.3921	39.1389	34.1747	6.99967	8.9908	6.74398	14.2581	-1.03205	4.12446e-05	0.000170681	GO:0005215,GO:0006810,GO:0016020,GO:0016021,GO:0022857,GO:0022891,GO:0055085	glucose transport protein;Smp_105410	Putative glucose transport protein [Source:UniProtKB/TrEMBL;Acc:G4VC44]	gi|4557851|ref|NP_000331.1|	solute carrier family 2, facilitated glucose transporter member 2 [Homo sapiens]
Smp_194590	24.2387	25.5673	25.0407	20.7079	9.77371	15.7272	13.3995	13.9104	-0.85549	5e-05	0.000268034	31.7321	28.9815	29.9676	28.4843	6.17494	13.3682	12.1353	10.797	-0.666343	1.9122e-08	2.5901e-07	17.9086	16.3791	16.4933	16.4785	3.08358	7.25431	5.92833	5.30635	-0.839726	6.66388e-09	7.02164e-08		vacuolar protein sorting associated protein 52;Smp_194590	Vacuolar protein sorting, putative [Source:UniProtKB/TrEMBL;Acc:G4LZA7]	gi|73747799|ref|NP_072047.4|	vacuolar protein sorting-associated protein 52 homolog [Homo sapiens]
Smp_130110	9.72818	10.5743	11.0146	9.13768	5.43144	5.04133	5.68797	6.1997	-0.855361	5e-05	0.000268034	18.6181	16.3483	17.8167	17.3004	4.22461	7.71615	6.83309	6.34274	-0.628053	5.15282e-13	1.69392e-11	11.2949	10.104	10.5781	11.1671	2.31147	4.7603	3.96547	3.29858	-0.796673	2.18245e-10	3.08892e-09	GO:0000502,GO:0003951,GO:0004143,GO:0007205,GO:0008152,GO:0016301,GO:0016310,GO:0016787	ceramide kinase;Smp_130110
Smp_179360	24.3092	28.0563	26.152	24.9389	14.4132	11.0071	12.6676	19.1154	-0.854853	5e-05	0.000268034	28.6913	23.4044	26.0008	27.0063	7.2215	9.4454	7.38013	12.0082	-0.745468	1.23876e-15	6.27585e-14	16.2257	13.3212	14.4877	15.9026	3.63592	5.17976	3.57634	6.00439	-0.882888	4.56659e-09	4.93918e-08	GO:0005794,GO:0006810,GO:0016020,GO:0016021	sortilin;Smp_179360	Sortilin, putative [Source:UniProtKB/TrEMBL;Acc:G4LWE6]	gi|17149834|ref|NP_002950.3|	sortilin isoform 1 preproprotein [Homo sapiens]
Smp_156880	28.0502	33.0025	32.6676	28.7074	15.6521	14.4905	15.8525	21.6994	-0.85482	5e-05	0.000268034	46.3957	40.5214	46.0963	46.4941	11.64	20.0181	15.5429	20.9596	-0.62281	2.70519e-14	1.13067e-12	26.3173	23.3746	25.6843	27.5835	5.95191	11.2298	7.87455	10.5487	-0.717825	6.10891e-09	6.46068e-08	GO:0006810,GO:0006886,GO:0006888,GO:0008270,GO:0015031,GO:0030127	protein transport protein sec24c;Smp_156880	Sec24-related C, d [Source:UniProtKB/TrEMBL;Acc:G4VKC5]	gi|190343021|ref|NP_055637.2|	protein transport protein Sec24D [Homo sapiens]
Smp_138400	5.63486	5.53172	6.95579	6.29042	2.71136	3.25087	3.4565	4.0947	-0.853243	5e-05	0.000268034	5.05581	5.04415	6.30561	6.34051	1.27776	2.5173	1.95789	2.45041	-0.64662	6.57835e-11	1.49488e-09	2.89127	2.90626	3.55297	3.74014	0.647619	1.41162	0.984137	1.23328	-0.836852	1.42606e-08	1.38835e-07		hypothetical protein;Smp_138400	Putative uncharacterized protein [Source:UniProtKB/TrEMBL;Acc:G4VFL2]	_	_
Smp_134530	11.3231	12.7342	13.7524	13.3922	5.48281	6.57819	6.29766	9.99538	-0.852645	5e-05	0.000268034	10.2573	8.82969	11.0871	11.8915	2.1333	3.65477	3.22811	4.98001	-0.792359	2.19564e-14	9.27639e-13	5.81956	5.10531	6.1734	7.0302	1.12661	2.07703	1.67388	2.54762	-0.900139	2.49202e-07	1.80671e-06	GO:0005215,GO:0005887,GO:0006810,GO:0015347,GO:0016020,GO:0016021,GO:0043252	Solute carrier organic anion transporter family;Smp_134530	Putative organic anion transporter [Source:UniProtKB/TrEMBL;Acc:G4VN11]	gi|225637473|ref|NP_112220.2|	solute carrier organic anion transporter family member 5A1 isoform 1 [Homo sapiens]
Smp_140890	49.2293	58.9875	64.1526	57.3256	28.683	31.8156	30.3271	36.5071	-0.851115	5e-05	0.000268034	58.0234	45.3075	60.1959	58.7806	13.0292	21.5441	19.0079	21.801	-0.694639	1.01531e-15	5.23444e-14	32.5619	25.5768	33.0018	34.0782	6.43713	11.5914	9.14958	10.7083	-0.910887	7.90281e-13	1.92018e-11	GO:0000244,GO:0000386,GO:0000398,GO:0003676,GO:0003723,GO:0005681,GO:0005682,GO:0017070,GO:0030619,GO:0030620,GO:0030623,GO:0071013,GO:0097157	pre mRNA processing splicing factor 8;Smp_140890	Splicing factor Prp8 , putative [Source:UniProtKB/TrEMBL;Acc:G4LY19]	gi|91208426|ref|NP_006436.3|	pre-mRNA-processing-splicing factor 8 [Homo sapiens]
SmVG_036022	3.47051	3.48128	3.1731	4.17844	0.948249	2.47655	2.01836	2.49054	-0.850287	0.0002	0.000928806	3.65815	3.82846	3.82359	4.64083	0.628046	1.96698	1.543	2.37028	-0.670131	0.00183194	0.00689361	2.91354	2.92202	2.89783	3.8684	0.477913	1.38355	1.02437	1.37556	-0.754165	0.000587348	0.00176947
SmVG_032735:Smp_039160	9.47811	9.70165	8.76821	9.37329	4.2009	5.0742	5.66553	5.767	-0.849835	5e-05	0.000268034	10.6489	9.80157	8.94294	10.8984	2.2827	4.50463	3.44651	3.78924	-0.654466	3.62489e-11	8.57012e-10	6.32236	5.90524	5.26083	6.71575	1.26802	2.62211	1.79725	1.9982	-0.878695	3.11547e-13	8.17167e-12		hypothetical protein;Smp_039160	Putative uncharacterized protein [Source:UniProtKB/TrEMBL;Acc:G4M0J5]	_	_
SmVG_032735:Smp_143420	9.47811	9.70165	8.76821	9.37329	4.2009	5.0742	5.66553	5.767	-0.849835	5e-05	0.000268034	10.6489	9.80157	8.94294	10.8984	2.2827	4.50463	3.44651	3.78924	-0.654466	3.62489e-11	8.57012e-10	6.32236	5.90524	5.26083	6.71575	1.26802	2.62211	1.79725	1.9982	-0.878695	3.11547e-13	8.17167e-12		hypothetical protein;Smp_143420	Actin bundling/missing in metastasis-related [Source:UniProtKB/TrEMBL;Acc:G4M0J7]	_	_
SmVG_032735:Smp_189450	9.47811	9.70165	8.76821	9.37329	4.2009	5.0742	5.66553	5.767	-0.849835	5e-05	0.000268034	10.6489	9.80157	8.94294	10.8984	2.2827	4.50463	3.44651	3.78924	-0.654466	3.62489e-11	8.57012e-10	6.32236	5.90524	5.26083	6.71575	1.26802	2.62211	1.79725	1.9982	-0.878695	3.11547e-13	8.17167e-12		histidine kinase DhkL;note=predicted by EVM2;Smp_189450	Histidine kinase DhkL-like [Source:UniProtKB/TrEMBL;Acc:G4M0J6]	_	_
Smp_156230	100.506	95.5478	66.2931	62.158	50.5	39.9897	38.1895	51.3854	-0.849728	5e-05	0.000268034	86.2548	89.6812	60.4351	60.789	21.012	26.2553	23.8284	28.1752	-0.697808	6.82967e-06	5.18674e-05	53.0065	56.0848	37.2846	39.4207	11.7196	15.932	13.0982	15.9168	-0.832229	0.000108674	0.000402286		hypothetical protein;Smp_156230	Putative uncharacterized protein [Source:UniProtKB/TrEMBL;Acc:G4VMG8]	_	_
Smp_136310	14.5566	13.5195	13.1768	11.9104	6.41005	6.90332	7.21138	9.00868	-0.848083	5e-05	0.000268034	13.1448	13.49	12.4957	12.5075	2.71718	4.54293	3.76443	5.15079	-0.853529	6.89606e-22	7.142e-20	7.64929	7.94239	7.1368	7.4993	1.48821	2.64281	2.01192	2.71184	-0.951399	9.00177e-13	2.14467e-11	GO:0005342,GO:0005887,GO:0006814,GO:0008508,GO:0016020,GO:0016021,GO:1903825	sodium bile acid cotransporter;Smp_136310	Sodium-bile acid cotransporter related [Source:UniProtKB/TrEMBL;Acc:G4VJW7]	gi|4506973|ref|NP_000443.1|	ileal sodium/bile acid cotransporter [Homo sapiens]
Smp_158820	9.00276	10.3817	10.6281	9.28918	4.89209	5.24274	5.20836	6.50275	-0.847228	5e-05	0.000268034	9.62334	7.60174	9.39007	9.16208	2.0422	3.50853	2.77843	3.41407	-0.746735	4.11846e-17	2.52347e-15	5.38731	4.43591	5.32505	5.42842	1.04655	1.92829	1.48714	1.79509	-0.91646	1.3401e-13	3.69316e-12	GO:0005515,GO:0005543,GO:0005622,GO:0016311,GO:0016791,GO:0035556,GO:0046872	myotubularin protein 13;Smp_158820	Myotubularin-related protein [Source:UniProtKB/TrEMBL;Acc:G4VHX5]	gi|29788755|ref|NP_112224.1|	myotubularin-related protein 13 [Homo sapiens]
Smp_008290	10.227	10.1206	9.87511	9.44998	5.20125	5.60535	5.30616	5.94167	-0.847076	5e-05	0.000268034	8.65465	8.25366	8.12216	8.64796	1.93895	3.31213	2.89957	3.02358	-0.711394	3.27211e-13	1.10996e-11	4.89464	4.70732	4.53441	5.08585	0.984437	1.8171	1.41837	1.51897	-0.938439	4.19638e-17	2.05671e-15	GO:0005802	trafficking protein particle complex subunit 9;note=predicted by EVM2;note=pfam_scan%3BPfam:PF08626.6%3B%3BE()%3D6.7E-19%3Bscore%3D66.7%3Bque ry 63-521%3Bdescription%3DTRAPPC9-Trs120;note=pfam_scan%3BPfam:PF08626.6%3B%3BE()%3D4.1E-6%3Bscore%3D24.3%3Bquer y 719-875%3Bdescription%3DTRAPPC9-Trs120;Smp_008290	Putative uncharacterized protein [Source:UniProtKB/TrEMBL;Acc:G4V7H3]	_	_
Smp_173330	29.6962	33.3365	30.1867	29.9435	14.6535	15.2849	18.3239	20.233	-0.846491	5e-05	0.000268034	30.2939	25.9581	26.4437	29.3116	5.97955	11.5321	8.38734	10.6515	-0.758175	4.5192e-20	3.77773e-18	16.9551	14.6593	14.5232	16.9929	3.03981	6.2614	4.09802	5.22026	-0.960581	2.66825e-15	9.86448e-14	GO:0005770,GO:0005829,GO:0006886,GO:0008565,GO:0015031,GO:0030904,GO:0042147	Vacuolar protein sorting associated protein;Smp_173330	Putative vacuolar sorting protein [Source:UniProtKB/TrEMBL;Acc:G4VM32]	gi|17999541|ref|NP_060676.2|	vacuolar protein sorting-associated protein 35 [Homo sapiens]
SmVG_024190:Smp_162790	10.5545	13.0619	11.9	10.4894	5.09364	5.99209	6.0153	8.50246	-0.845477	5e-05	0.000268034	16.4053	13.0143	14.782	13.8914	3.06865	4.86842	4.94322	6.112	-0.813019	7.9313e-15	3.58379e-13	9.18288	7.34712	8.07275	8.02068	1.53011	2.63619	2.33785	3.02944	-0.950625	1.46355e-09	1.78561e-08		membrane protein%2C palmitoylated 5;Smp_162790	Cell polarity protein [Source:UniProtKB/TrEMBL;Acc:G4VS65]	gi|111154074|ref|NP_775767.2|	MAGUK p55 subfamily member 7 [Homo sapiens]
SmVG_024190:Smp_183250	10.5545	13.0619	11.9	10.4894	5.09364	5.99209	6.0153	8.50246	-0.845477	5e-05	0.000268034	16.4053	13.0143	14.782	13.8914	3.06865	4.86842	4.94322	6.112	-0.813019	7.9313e-15	3.58379e-13	9.18288	7.34712	8.07275	8.02068	1.53011	2.63619	2.33785	3.02944	-0.950625	1.46355e-09	1.78561e-08		MAGUK p55 subfamily;note=pfam_scan%3BPfam:PF07653.12%3B%3BE()%3D5.9E-10%3Bscore%3D38.3%3Bqu ery 18-62%3Bdescription%3DSH3_2;note=iprscan%3BInterPro:IPR011511 : Variant SH3%3BPfam:PF07653%3B%3Bscore%3D5.6E-9%3Bquery 17-62%3Bdescription%3DVariant SH3;Smp_183250	Putative maguk P55 subfamily member 3,5 [Source:UniProtKB/TrEMBL;Acc:G4VS66]	gi|21536464|ref|NP_001923.2|	MAGUK p55 subfamily member 3 [Homo sapiens]
Smp_102340	42.0519	45.9808	45.7203	39.8764	19.4366	22.3809	23.846	30.9915	-0.845094	5e-05	0.000268034	39.7369	35.1979	38.7182	37.2171	7.97021	14.6674	12.4213	16.6315	-0.77103	3.09771e-21	3.02105e-19	22.4309	20.0444	21.3895	21.6949	4.06128	8.09769	6.12616	8.29952	-0.897255	6.70621e-10	8.70184e-09	GO:0000166,GO:0004016,GO:0004383,GO:0005622,GO:0005886,GO:0006182,GO:0007165,GO:0009190,GO:0016020,GO:0016021,GO:0016829,GO:0016849,GO:0035556	adenylate cyclase type IX;Smp_102340	Adenylate cyclase type IX, putative [Source:UniProtKB/TrEMBL;Acc:G4LV56]	gi|50959205|ref|NP_001107.2|	adenylate cyclase type 9 [Homo sapiens]
Smp_149740	7.19746	8.70989	9.05465	7.40352	4.67517	4.07565	3.86027	5.43115	-0.843078	5e-05	0.000268034	9.03619	7.275	9.3388	8.31695	2.26702	2.70989	2.58956	3.42545	-0.780366	6.55221e-12	1.77501e-10	5.08583	4.0696	5.1297	4.86565	1.1488	1.47172	1.29836	1.70174	-0.917627	4.6561e-09	5.02965e-08	GO:0008201,GO:0016020,GO:0016021	alzheimer's disease beta amyloid;Smp_149740	Alzheimer's disease beta-amyloid related [Source:UniProtKB/TrEMBL;Acc:G4LY13]	gi|41406057|ref|NP_958817.1|	amyloid beta A4 protein isoform c precursor [Homo sapiens]
Smp_131220	6.54608	6.40572	7.74651	7.49396	3.33044	3.48254	3.69114	5.2122	-0.843036	5e-05	0.000268034	6.68149	6.57924	7.59981	8.34222	1.59972	2.68724	2.34247	3.16849	-0.732321	2.10654e-12	6.13256e-11	3.84572	3.86689	4.27872	4.97356	0.852485	1.57393	1.19473	1.64518	-0.902814	6.64831e-10	8.66555e-09	GO:0004252,GO:0006508,GO:0016787	tripeptidyl peptidase 2;Smp_131220	Tripeptidyl-peptidase II (S08 family) [Source:UniProtKB/TrEMBL;Acc:G4VKW7]	gi|186972143|ref|NP_003282.2|	tripeptidyl-peptidase 2 [Homo sapiens]
SmVG_018961	2.35564	2.18649	1.75373	2.11842	1.04032	1.0955	1.02249	1.53502	-0.842225	0.0001	0.000501375	2.31823	2.71307	1.99174	2.42481	0.455583	0.978584	0.755751	1.05701	-0.767764	3.57061e-06	2.92216e-05	1.28436	1.52336	1.09031	1.38973	0.261706	0.523407	0.443735	0.536103	-0.763435	0.000106516	0.000395149
Smp_160240	2.84901	4.10587	3.87601	2.54076	2.78425	1.50637	1.66331	1.50479	-0.842177	0.00325	0.0103569	5.98654	3.83385	5.53074	4.301	1.50328	1.66897	1.59137	1.4646	-0.700688	0.000314358	0.00152463	3.30842	2.16693	3.04862	2.49276	0.791866	0.92563	0.779321	0.725266	-0.96177	4.86645e-05	0.000197717	GO:0004252,GO:0006508,GO:0008233,GO:0008236,GO:0016485,GO:0016787	furin 1 (S08 family);Smp_160240
Smp_164810	1.96228	3.14626	2.14161	1.52532	1.34034	1.00882	1.18321	1.36692	-0.840903	0.00105	0.0039264	2.80549	1.7644	1.71431	1.49017	0.429017	0.724251	0.649809	0.754078	-0.8075	4.81226e-06	3.81041e-05	1.84006	1.27106	1.22339	1.15284	0.300996	0.576249	0.385467	0.495219	-0.866192	5.59955e-05	0.000223591	GO:0000166,GO:0004672,GO:0004713,GO:0004715,GO:0005102,GO:0005515,GO:0005524,GO:0006468,GO:0007169,GO:0016301,GO:0016310,GO:0016740,GO:0016772,GO:0030154,GO:0031234,GO:0038083,GO:0042127,GO:0045087	tyrosine protein kinase Fps85D;Smp_164810	Tyrosine kinase [Source:UniProtKB/TrEMBL;Acc:G4M0H9]	_	_
Smp_132560	14.3306	16.7671	18.0675	16.6851	7.43865	7.2782	9.89811	12.1538	-0.840711	0.00155	0.00550008	14.5039	11.8265	15.1263	15.2714	2.74361	6.01122	3.77409	5.83142	-0.804616	5.77831e-11	1.33117e-09	8.17769	6.72177	8.30478	8.87463	1.43333	3.2709	1.83442	2.87279	-0.965754	3.56623e-09	3.98795e-08		CCR4 NOT transcription complex subunit 10;note=trans_spliced (SO:0000870);note=predicted by EVM2;Smp_132560	Putative uncharacterized protein [Source:UniProtKB/TrEMBL;Acc:G4VG27]	gi|13123772|ref|NP_056257.1|	CCR4-NOT transcription complex subunit 10 [Homo sapiens]
Smp_205600	70.5676	74.6349	94.7397	103.682	34.203	59.9774	35.303	62.5521	-0.839458	5e-05	0.000268034	104.649	93.3735	124.621	141.107	21.17	37.4909	46.0361	51.9166	-0.691137	3.40334e-05	0.000215877	94.4977	85.1201	106.929	131.205	17.5853	29.9	36.8335	37.2338	-0.904905	2.40143e-06	1.37222e-05		hypothetical protein;Smp_205600	WGS project CABG00000000 data, supercontig 0452, strain Puerto Rico [Source:UniProtKB/TrEMBL;Acc:G4M214]	_	_
Smp_175120	46.3504	47.8503	36.4272	34.6719	22.3596	15.8067	24.8837	29.375	-0.838728	5e-05	0.000268034	71.2495	63.8902	52.5298	54.7457	15.758	25.4446	13.7616	24.7468	-0.818284	8.06435e-07	7.5744e-06	40.7814	36.7721	28.8383	31.453	7.7742	13.6812	6.47405	11.8664	-0.966244	1.60976e-07	1.21647e-06	GO:0016020,GO:0016021	Alpha (1%2C6) fucosyltransferase (EC 2;Smp_175120	Putative uncharacterized protein [Source:UniProtKB/TrEMBL;Acc:G4LZL8]	gi|30410726|ref|NP_835368.1|	alpha-(1,6)-fucosyltransferase isoform a [Homo sapiens]
Smp_127920	6.85042	8.36113	8.41839	7.89587	3.82796	4.19741	4.23596	5.37337	-0.838116	5e-05	0.000268034	7.95377	6.26018	7.82108	8.01948	1.55077	2.97393	2.35002	3.08584	-0.759857	1.11252e-15	5.68552e-14	4.59972	3.58059	4.42642	4.79926	0.770442	1.58444	1.18089	1.5624	-0.973877	4.33326e-11	7.2449e-10	GO:0000166,GO:0004672,GO:0004674,GO:0005524,GO:0006468,GO:0016301,GO:0016310,GO:0016740,GO:0016772	serine:threonine protein kinase 11;Smp_127920	Serine/threonine kinase [Source:UniProtKB/TrEMBL;Acc:G4VMR0]	_	_
Smp_128190	5.97087	6.14284	6.48748	7.64764	2.19936	3.23413	3.90093	5.38508	-0.834525	5e-05	0.000268034	6.97947	6.81588	7.14379	9.58594	1.55245	3.45963	2.81352	3.69521	-0.601664	6.02985e-08	7.42814e-07	4.16184	4.0703	4.12302	5.85075	0.817965	2.00207	1.47577	1.97517	-0.754826	3.83255e-05	0.000160116		hypothetical protein;Smp_128190	Putative uncharacterized protein [Source:UniProtKB/TrEMBL;Acc:G4VD82]	_	_
Smp_179880	1.65902	1.85978	1.75543	1.46194	0.77023	0.795695	1.00538	1.21147	-0.832482	0.00245	0.00816107	2.63539	2.00747	2.19385	2.09991	0.332056	0.81903	0.713157	0.938089	-0.929904	2.64146e-08	3.52085e-07	1.61729	1.42481	1.41055	1.47227	0.268978	0.623652	0.415918	0.559703	-0.866862	3.58172e-08	3.15081e-07		hypothetical protein;Smp_179880	Putative uncharacterized protein [Source:UniProtKB/TrEMBL;Acc:C4QPK1]	_	_
Smp_199360	13.5535	17.0639	13.6709	12.527	6.1099	9.15324	7.2956	9.37018	-0.831416	0.0001	0.000501375	27.8963	22.2364	22.94	22.9568	5.5093	9.19351	8.98961	10.0372	-0.698393	4.44258e-09	6.92298e-08	16.603	13.406	13.441	14.2034	3.0434	5.33766	4.86262	5.33325	-0.827302	5.95016e-08	4.97898e-07	GO:0004672,GO:0005524,GO:0006468,GO:0016301,GO:0016310,GO:0016772	protein associating with the carboxyl terminal;note=pfam_scan%3BPfam:PF00069.20%3B%3BE()%3D1.8E-7%3Bscore%3D30.4%3Bque ry 94-244%3Bdescription%3DPkinase;Smp_199360	Scy1(Yeast) protein kinase-like [Source:UniProtKB/TrEMBL;Acc:G4M1Q6]	gi|170784850|ref|NP_851607.2|	protein-associating with the carboxyl-terminal domain of ezrin isoform 2 [Homo sapiens]
SmVG_020055:Smp_082330	4.67376	4.78717	4.43017	3.94463	2.24588	2.1994	2.16694	3.41599	-0.830706	5e-05	0.000268034	3.64904	2.82908	3.05357	2.60615	0.68814	0.963463	0.850495	1.38234	-0.907002	7.93443e-14	3.07472e-12	2.3229	2.04865	2.01273	2.03864	0.425042	0.725749	0.572662	0.903991	-0.897525	3.15007e-07	2.22371e-06		transcriptional repressor CTCFL;Smp_082330	Putative uncharacterized protein [Source:UniProtKB/TrEMBL;Acc:G4VM78]	_	_
SmVG_020055:Smp_127000	4.67376	4.78717	4.43017	3.94463	2.24588	2.1994	2.16694	3.41599	-0.830706	5e-05	0.000268034	3.64904	2.82908	3.05357	2.60615	0.68814	0.963463	0.850495	1.38234	-0.907002	7.93443e-14	3.07472e-12	2.3229	2.04865	2.01273	2.03864	0.425042	0.725749	0.572662	0.903991	-0.897525	3.15007e-07	2.22371e-06		Large neutral amino acids transporter small;Smp_127000	Putative cationic amino acid transporter [Source:UniProtKB/TrEMBL;Acc:G4VM80]	gi|71979932|ref|NP_003477.4|	large neutral amino acids transporter small subunit 1 [Homo sapiens]
SmVG_020055:Smp_181630	4.67376	4.78717	4.43017	3.94463	2.24588	2.1994	2.16694	3.41599	-0.830706	5e-05	0.000268034	3.64904	2.82908	3.05357	2.60615	0.68814	0.963463	0.850495	1.38234	-0.907002	7.93443e-14	3.07472e-12	2.3229	2.04865	2.01273	2.03864	0.425042	0.725749	0.572662	0.903991	-0.897525	3.15007e-07	2.22371e-06		hypothetical protein;Smp_181630	Putative uncharacterized protein [Source:UniProtKB/TrEMBL;Acc:G4VM79]	_	_
SmVG_029651:Smp_096370	4.30691	4.36317	5.48416	4.08157	2.20386	2.14256	2.40168	3.51305	-0.829583	5e-05	0.000268034	3.60753	3.58327	4.55284	3.73177	0.81476	1.47406	1.18566	1.80151	-0.807284	2.39711e-15	1.16889e-13	2.10664	2.07372	2.56548	2.22022	0.418358	0.829628	0.577982	0.919626	-0.91305	2.63415e-07	1.89064e-06		Fibronectin type III domain containing protein;Smp_096370	Putative uncharacterized protein [Source:UniProtKB/TrEMBL;Acc:G4LY43]	_	_
SmVG_029651:Smp_173270	4.30691	4.36317	5.48416	4.08157	2.20386	2.14256	2.40168	3.51305	-0.829583	5e-05	0.000268034	3.60753	3.58327	4.55284	3.73177	0.81476	1.47406	1.18566	1.80151	-0.807284	2.39711e-15	1.16889e-13	2.10664	2.07372	2.56548	2.22022	0.418358	0.829628	0.577982	0.919626	-0.91305	2.63415e-07	1.89064e-06		Fibronectin type III domain containing protein;Smp_173270	Factor for adipocyte differentiation, putative [Source:UniProtKB/TrEMBL;Acc:G4LY41]	gi|205360932|ref|NP_073600.3|	fibronectin type III domain-containing protein 3B [Homo sapiens]
SmVG_029651:Smp_175050	4.30691	4.36317	5.48416	4.08157	2.20386	2.14256	2.40168	3.51305	-0.829583	5e-05	0.000268034	3.60753	3.58327	4.55284	3.73177	0.81476	1.47406	1.18566	1.80151	-0.807284	2.39711e-15	1.16889e-13	2.10664	2.07372	2.56548	2.22022	0.418358	0.829628	0.577982	0.919626	-0.91305	2.63415e-07	1.89064e-06		Fibronectin type III domain containing protein;Smp_175050	Factor for adipocyte differentiation, putative [Source:UniProtKB/TrEMBL;Acc:G4LY42]	gi|291045230|ref|NP_597681.3|	titin isoform novex-2 [Homo sapiens]
SmVG_023113:Smp_142970	13.5036	12.9754	11.1846	8.98472	6.16778	6.88616	6.58183	6.62369	-0.828988	5e-05	0.000268034	26.0715	28.5913	21.6511	20.8455	6.76718	9.30103	9.12202	8.21188	-0.673917	5.67517e-12	1.55907e-10	15.1238	16.7217	12.3391	12.4653	3.55276	5.2558	4.67041	4.2795	-0.874677	2.92628e-09	3.33316e-08		palmitoyl protein thioesterase 1;Smp_142970	Putative palmitoyl-protein thioesterase [Source:UniProtKB/TrEMBL;Acc:G4VNU1]	gi|4506031|ref|NP_000301.1|	palmitoyl-protein thioesterase 1 isoform 1 precursor [Homo sapiens]
SmVG_023113:Smp_142980	13.5036	12.9754	11.1846	8.98472	6.16778	6.88616	6.58183	6.62369	-0.828988	5e-05	0.000268034	26.0715	28.5913	21.6511	20.8455	6.76718	9.30103	9.12202	8.21188	-0.673917	5.67517e-12	1.55907e-10	15.1238	16.7217	12.3391	12.4653	3.55276	5.2558	4.67041	4.2795	-0.874677	2.92628e-09	3.33316e-08		palmitoyl protein thioesterase;Smp_142980	Putative palmitoyl-protein thioesterase [Source:UniProtKB/TrEMBL;Acc:G4VNU2]	gi|4506031|ref|NP_000301.1|	palmitoyl-protein thioesterase 1 isoform 1 precursor [Homo sapiens]
Smp_172580	13.1702	17.6861	16.3408	11.6522	8.3309	4.63258	8.06906	12.103	-0.828647	5e-05	0.000268034	18.7846	13.9108	17.2777	13.5592	3.9918	6.13049	2.95353	7.97828	-0.940289	5.197e-06	4.08465e-05	10.4332	7.72996	9.40549	7.66134	1.9976	3.20135	1.38997	3.87251	-0.934353	0.000161051	0.00056589	GO:0005158	docking protein 3;Smp_172580	Mucin-like protein [Source:UniProtKB/TrEMBL;Acc:G4VHZ2]	_	_
SmVG_000039:Smp_130920	3.42861	5.19151	4.77811	3.16887	1.62742	2.49895	2.29715	2.90671	-0.828337	5e-05	0.000268034	7.32207	4.87331	6.44522	5.01168	0.996084	2.14096	2.1634	2.42201	-0.867317	1.33709e-06	1.20369e-05	4.2994	2.90578	3.71866	3.08643	0.540409	1.24443	1.13523	1.29693	-0.965107	5.11844e-06	2.67525e-05		multiple C2 and transmembrane domain containing protein;Smp_130920	Mctp-related [Source:UniProtKB/TrEMBL;Acc:G4V5E9]	gi|205361109|ref|NP_078993.4|	multiple C2 and transmembrane domain-containing protein 1 isoform L [Homo sapiens]
SmVG_000039:Smp_130930	3.42861	5.19151	4.77811	3.16887	1.62742	2.49895	2.29715	2.90671	-0.828337	5e-05	0.000268034	7.32207	4.87331	6.44522	5.01168	0.996084	2.14096	2.1634	2.42201	-0.867317	1.33709e-06	1.20369e-05	4.2994	2.90578	3.71866	3.08643	0.540409	1.24443	1.13523	1.29693	-0.965107	5.11844e-06	2.67525e-05		multiple C2 and transmembrane domain containing protein;note=pfam_scan%3BPfam:PF08372.5%3B%3BE()%3D2.9E-10%3Bscore%3D39.7%3Bque ry 18-119%3Bdescription%3DPRT_C;Smp_130930	Putative uncharacterized protein [Source:UniProtKB/TrEMBL;Acc:G4V5F0]	gi|205361109|ref|NP_078993.4|	multiple C2 and transmembrane domain-containing protein 1 isoform L [Homo sapiens]
Smp_194760	55.428	62.4654	56.1749	54.7911	30.2655	22.6881	32.0864	43.9035	-0.827722	5e-05	0.000268034	57.6909	49.219	50.6223	54.1984	13.1402	21.3929	13.5215	24.2975	-0.772597	2.92629e-15	1.39781e-13	33.4251	28.7032	28.7488	32.3457	6.90174	12.0212	6.84638	12.5166	-0.884993	2.24268e-08	2.06611e-07	GO:0005515	hypothetical protein;Smp_194760	Putative uncharacterized protein [Source:UniProtKB/TrEMBL;Acc:G4VAV0]	_	_
Smp_158630	12.369	15.3502	14.5442	13.3928	5.78264	6.63203	9.01824	9.93324	-0.827332	5e-05	0.000268034	15.949	11.8419	13.8155	15.0114	3.08554	6.49685	4.38	5.44449	-0.689824	1.29572e-09	2.27003e-08	9.26564	6.92998	7.87123	9.01544	1.62031	3.6708	2.23152	2.82085	-0.889394	2.58993e-09	2.98172e-08		cement protein 3B variant 1;note=predicted by EVM2;Smp_158630	Cement protein 3B variant 1, putative [Source:UniProtKB/TrEMBL;Acc:G4LZ89]	_	_
Smp_135390	3.99743	3.89138	3.88013	4.5453	2.64468	1.43174	2.79101	2.3306	-0.826733	0.003	0.00966225	4.71727	3.92411	4.02891	5.77898	1.31921	2.26039	1.15838	1.41712	-0.571217	0.00590711	0.0186588	2.66501	2.23956	2.27237	3.37891	0.673834	1.22891	0.568953	0.704696	-0.890255	4.75028e-05	0.000193462		hypothetical protein;Smp_135390	Putative uncharacterized protein [Source:UniProtKB/TrEMBL;Acc:G4VQH0]	_	_
SmVG_024753:Smp_150770	3.8823	4.14114	4.64719	3.96555	2.11568	2.2544	2.17261	2.83948	-0.826331	5e-05	0.000268034	3.73588	3.39199	4.13826	3.89184	0.857192	1.42589	1.29041	1.59694	-0.734461	6.06103e-12	1.66118e-10	2.0912	1.91666	2.2653	2.25003	0.431505	0.776111	0.634714	0.785109	-0.899345	1.5734e-10	2.27957e-09		teneurin;Smp_150770	Putative teneurin and n-acetylglucosamine-1-phosphodiester alpha-n-acetylglucosaminidase [Source:UniProtKB/TrEMBL;Acc:G4VRL1]	gi|170016091|ref|NP_001116151.1|	teneurin-2 [Homo sapiens]
SmVG_024753:Smp_172870	3.8823	4.14114	4.64719	3.96555	2.11568	2.2544	2.17261	2.83948	-0.826331	5e-05	0.000268034	3.73588	3.39199	4.13826	3.89184	0.857192	1.42589	1.29041	1.59694	-0.734461	6.06103e-12	1.66118e-10	2.0912	1.91666	2.2653	2.25003	0.431505	0.776111	0.634714	0.785109	-0.899345	1.5734e-10	2.27957e-09		hypothetical protein;Smp_172870	Putative uncharacterized protein [Source:UniProtKB/TrEMBL;Acc:G4VRL2]	_	_
Smp_046360	22.7412	29.1946	22.9304	22.1495	14.2089	7.69259	14.1218	18.7244	-0.825423	5e-05	0.000268034	26.3376	19.5778	20.5077	22.1757	5.98238	9.40179	4.53607	10.735	-0.789641	9.71599e-05	0.000550369	15.9259	11.7219	11.6987	13.5214	3.49074	5.46215	2.49743	5.78716	-0.822586	0.000154467	0.000546786	GO:0003676,GO:0005622,GO:0008270,GO:0046872	Zinc finger protein 143;Smp_046360	Putative zinc finger protein [Source:UniProtKB/TrEMBL;Acc:G4VKT3]	gi|21687264|ref|NP_653294.1|	zinc finger protein 558 [Homo sapiens]
SmVG_035057:Smp_130400	10.7596	13.9296	15.1402	12.7927	7.83401	6.88521	6.71107	8.27618	-0.824892	5e-05	0.000268034	14.9934	11.6727	16.3859	15.6475	3.83656	5.39225	4.41496	5.60592	-0.712943	2.26051e-11	5.60483e-10	8.95851	7.14753	9.5339	9.68523	2.16722	3.24438	2.36589	2.97178	-0.919446	2.91865e-13	7.70253e-12		hypothetical protein;Smp_130400	Putative uncharacterized protein [Source:UniProtKB/TrEMBL;Acc:C4Q195]	_	_
SmVG_035057:Smp_139110	10.7596	13.9296	15.1402	12.7927	7.83401	6.88521	6.71107	8.27618	-0.824892	5e-05	0.000268034	14.9934	11.6727	16.3859	15.6475	3.83656	5.39225	4.41496	5.60592	-0.712943	2.26051e-11	5.60483e-10	8.95851	7.14753	9.5339	9.68523	2.16722	3.24438	2.36589	2.97178	-0.919446	2.91865e-13	7.70253e-12		ankyrin 2%2C3:unc44;Smp_139110	Ankyrin 2,3/unc44, putative [Source:UniProtKB/TrEMBL;Acc:C4Q5U3]	gi|215598574|ref|NP_001135918.1|	ankyrin-1 isoform 9 [Homo sapiens]
SmVG_035057:Smp_139120	10.7596	13.9296	15.1402	12.7927	7.83401	6.88521	6.71107	8.27618	-0.824892	5e-05	0.000268034	14.9934	11.6727	16.3859	15.6475	3.83656	5.39225	4.41496	5.60592	-0.712943	2.26051e-11	5.60483e-10	8.95851	7.14753	9.5339	9.68523	2.16722	3.24438	2.36589	2.97178	-0.919446	2.91865e-13	7.70253e-12		hypothetical protein;Smp_139120	Putative uncharacterized protein [Source:UniProtKB/TrEMBL;Acc:C4Q5Q2]	_	_
Smp_076520	21.6233	21.1364	18.1758	16.5813	10.4282	6.53397	12.0983	14.7259	-0.824027	5e-05	0.000268034	28.8748	27.3519	24.3672	24.7979	7.21856	12.6266	6.11213	11.4134	-0.736344	2.66549e-05	0.000173494	16.3088	15.7321	13.5534	14.5807	3.71518	7.02506	3.0722	5.76302	-0.827042	3.70872e-06	2.01073e-05	GO:0005215,GO:0006810,GO:0016020,GO:0016021	transmembrane protein 184A;Smp_076520	Organic solute transporter, putative [Source:UniProtKB/TrEMBL;Acc:G4LZH0]	gi|148276981|ref|NP_001091089.1|	transmembrane protein 184A [Homo sapiens]
Smp_138200	3.38493	3.97635	4.01051	4.0635	1.04076	2.82627	2.43152	2.42094	-0.823917	0.00015	0.000719901	3.37604	2.79619	3.5345	3.84695	0.484767	1.55915	1.48304	1.30582	-0.692792	0.00886351	0.0260889	1.93317	1.6111	1.99105	2.27501	0.243244	0.867909	0.7409	0.662905	-0.865597	0.000312387	0.00101915	GO:0005488	thyroid adenoma associated protein;Smp_138200	Putative uncharacterized protein [Source:UniProtKB/TrEMBL;Acc:G4LW86]	_	_
SmVG_002622:Smp_147990	28.1024	31.4288	31.0974	26.8974	15.4602	12.6255	17.2107	21.1355	-0.823032	5e-05	0.000268034	35.03	31.3524	33.9099	33.9716	7.9698	14.8236	10.4049	14.5059	-0.698096	1.21502e-16	7.03929e-15	19.5584	17.5954	18.532	19.5908	3.94042	7.91574	4.96522	7.08064	-0.83992	1.24246e-10	1.85655e-09		cyclic AMP dependent transcription factor ATF 6;Smp_147990	Putative uncharacterized protein [Source:UniProtKB/TrEMBL;Acc:G4V8W4]	_	_
SmVG_002622:Smp_147990.2	28.1024	31.4288	31.0974	26.8974	15.4602	12.6255	17.2107	21.1355	-0.823032	5e-05	0.000268034	35.03	31.3524	33.9099	33.9716	7.9698	14.8236	10.4049	14.5059	-0.698096	1.21502e-16	7.03929e-15	19.5584	17.5954	18.532	19.5908	3.94042	7.91574	4.96522	7.08064	-0.83992	1.24246e-10	1.85655e-09		cyclic AMP dependent transcription factor ATF 6;Smp_147990.2
SmVG_002622:Smp_147990.3	28.1024	31.4288	31.0974	26.8974	15.4602	12.6255	17.2107	21.1355	-0.823032	5e-05	0.000268034	35.03	31.3524	33.9099	33.9716	7.9698	14.8236	10.4049	14.5059	-0.698096	1.21502e-16	7.03929e-15	19.5584	17.5954	18.532	19.5908	3.94042	7.91574	4.96522	7.08064	-0.83992	1.24246e-10	1.85655e-09		cyclic AMP dependent transcription factor ATF 6;Smp_147990.3
SmVG_002622:Smp_148000	28.1024	31.4288	31.0974	26.8974	15.4602	12.6255	17.2107	21.1355	-0.823032	5e-05	0.000268034	35.03	31.3524	33.9099	33.9716	7.9698	14.8236	10.4049	14.5059	-0.698096	1.21502e-16	7.03929e-15	19.5584	17.5954	18.532	19.5908	3.94042	7.91574	4.96522	7.08064	-0.83992	1.24246e-10	1.85655e-09		hypothetical protein;note=iprscan%3BPANTHER:PTHR22952%3B%3Bscore%3D6.6E-6%3Bquery 277-313%3Bdescription%3Dnull;note=iprscan%3BPANTHER:PTHR22952:SF9%3B%3Bscore%3D6.6E-6%3Bquery 277-313%3Bdescription%3Dnull;Smp_148000	Putative uncharacterized protein [Source:UniProtKB/TrEMBL;Acc:G4V8W7]	_	_
Smp_097180	18.5478	20.423	16.0367	16.0101	8.43773	8.36424	10.9752	12.3664	-0.823013	5e-05	0.000268034	33.8772	27.0456	24.3031	25.5519	5.70967	11.3032	6.20109	11.3985	-0.896953	2.56319e-09	4.21306e-08	19.2211	15.4288	13.4201	14.8687	2.81002	6.21439	3.51283	5.64948	-0.982851	1.96203e-08	1.83116e-07	GO:0000166,GO:0000287,GO:0005737,GO:0008253,GO:0009117,GO:0016311,GO:0016787	cytosolic 5' nucleotidase III;Smp_097180	Putative uncharacterized protein [Source:UniProtKB/TrEMBL;Acc:G4VD02]	gi|70608082|ref|NP_001002010.1|	cytosolic 5'-nucleotidase 3 isoform 1 [Homo sapiens]
Smp_016840	16.1173	19.3675	19.7256	18.5684	8.20321	10.2647	10.8435	12.4064	-0.82254	5e-05	0.000268034	18.5773	14.8871	18.4211	18.6765	3.5666	7.36322	5.85131	6.77378	-0.731432	7.06334e-13	2.24017e-11	10.4583	8.46553	10.1738	10.879	1.81245	4.01465	2.89879	3.36464	-0.932629	5.63411e-12	1.16163e-10	GO:0005049,GO:0005643,GO:0005737,GO:0006611,GO:0008536	exportin 4;Smp_016840	Putative uncharacterized protein [Source:UniProtKB/TrEMBL;Acc:G4VKZ2]	_	_
SmVG_032592:Smp_076620	30.1371	33.3703	34.295	33.2707	13.8906	14.1522	17.7294	28.3773	-0.821863	5e-05	0.000268034	29.4555	26.4461	29.9579	33.4798	6.95977	12.9653	8.98357	16.2844	-0.686296	5.63123e-17	3.36236e-15	17.722	16.1193	17.9214	20.9893	3.96888	7.73293	4.87746	8.81715	-0.742495	2.82508e-05	0.000122254		RB1 inducible coiled coil protein 1;Smp_076620	Putative uncharacterized protein [Source:UniProtKB/TrEMBL;Acc:G4M0F1]	_	_
SmVG_032592:Smp_078160	30.1371	33.3703	34.295	33.2707	13.8906	14.1522	17.7294	28.3773	-0.821863	5e-05	0.000268034	29.4555	26.4461	29.9579	33.4798	6.95977	12.9653	8.98357	16.2844	-0.686296	5.63123e-17	3.36236e-15	17.722	16.1193	17.9214	20.9893	3.96888	7.73293	4.87746	8.81715	-0.742495	2.82508e-05	0.000122254		RB1 inducible coiled coil protein 1;Smp_078160	Putative uncharacterized protein [Source:UniProtKB/TrEMBL;Acc:G4M0E8]	_	_
SmVG_032592:Smp_164300	30.1371	33.3703	34.295	33.2707	13.8906	14.1522	17.7294	28.3773	-0.821863	5e-05	0.000268034	29.4555	26.4461	29.9579	33.4798	6.95977	12.9653	8.98357	16.2844	-0.686296	5.63123e-17	3.36236e-15	17.722	16.1193	17.9214	20.9893	3.96888	7.73293	4.87746	8.81715	-0.742495	2.82508e-05	0.000122254		RB1 inducible coiled coil protein 1;Smp_164300	Putative uncharacterized protein [Source:UniProtKB/TrEMBL;Acc:G4M0F0]	_	_
SmVG_018669:Smp_168500	7.97964	12.3722	9.82288	7.33852	5.86244	4.30389	4.58278	6.48592	-0.820952	5e-05	0.000268034	14.1597	9.3717	11.4193	9.95501	4.20704	5.41776	3.89074	5.62776	-0.512724	0.000724723	0.00313084	8.22869	5.54925	6.57379	6.06367	2.24339	3.09023	2.01718	2.94146	-0.566856	0.000394165	0.00125017		hypoxanthine guanine phosphoribosyltransferase;Smp_168500	Hypoxanthine-guanine phosphoribosyltransferase,putative [Source:UniProtKB/TrEMBL;Acc:G4LWQ1]	gi|9910262|ref|NP_064585.1|	phosphoribosyltransferase domain-containing protein 1 [Homo sapiens]
SmVG_018669:Smp_198230	7.97964	12.3722	9.82288	7.33852	5.86244	4.30389	4.58278	6.48592	-0.820952	5e-05	0.000268034	14.1597	9.3717	11.4193	9.95501	4.20704	5.41776	3.89074	5.62776	-0.512724	0.000724723	0.00313084	8.22869	5.54925	6.57379	6.06367	2.24339	3.09023	2.01718	2.94146	-0.566856	0.000394165	0.00125017		hypothetical protein;Smp_198230	Putative uncharacterized protein [Source:UniProtKB/TrEMBL;Acc:G4LWQ0]	gi|89001107|ref|NP_055023.2|	dentin sialophosphoprotein preproprotein [Homo sapiens]
Smp_137650	21.8456	24.8635	25.8446	24.273	10.4741	14.4711	14.1244	15.7896	-0.819671	5e-05	0.000268034	24.1545	21.2461	24.9557	26.646	4.89239	10.273	9.01289	9.45792	-0.676827	6.3473e-10	1.19234e-08	13.7424	12.218	13.9406	15.7112	2.52036	5.66656	4.48312	4.74529	-0.880712	1.769e-10	2.54149e-09	GO:0000049,GO:0005488,GO:0005643,GO:0005737,GO:0008536,GO:0015932,GO:0016363,GO:0071528	exportin T;Smp_137650	Putative uncharacterized protein [Source:UniProtKB/TrEMBL;Acc:G4VBF2]	gi|8051636|ref|NP_009166.2|	exportin-T [Homo sapiens]
Smp_013630	8.5826	9.38352	8.91109	7.87611	3.86496	3.28398	4.6519	7.90899	-0.818235	5e-05	0.000268034	7.63027	7.12335	7.16631	6.74171	1.54058	2.61881	1.95547	3.85429	-0.856848	2.01578e-08	2.72096e-07	4.5885	4.27554	4.2614	4.28531	0.839754	1.57123	1.04496	2.038	-0.86196	6.99055e-05	0.000271918	GO:0005509,GO:0005886,GO:0007155,GO:0007156,GO:0016020,GO:0016021	cadherin;Smp_013630	Cadherin-related [Source:UniProtKB/TrEMBL;Acc:G4VEK9]	gi|11128035|ref|NP_061746.1|	protocadherin gamma-B2 isoform 1 precursor [Homo sapiens]
Smp_158830	13.9663	15.1142	14.6732	14.2555	6.97333	7.02826	8.684	10.2305	-0.81749	5e-05	0.000268034	15.2893	13.2029	14.1938	15.5075	2.95991	6.02315	4.24037	6.28941	-0.776022	8.05682e-18	5.41891e-16	8.77415	7.6232	7.99439	9.18039	1.53706	3.40027	2.11451	3.19413	-0.923393	7.0717e-10	9.1072e-09	GO:0005829,GO:0006891,GO:0016021,GO:0034498,GO:1990071	transmembrane protein 1:tmem1b;Smp_158830	Putative transmembrane protein 1/tmem1b [Source:UniProtKB/TrEMBL;Acc:G4VHX4]	_	_
Smp_202970	321.421	314.163	325.117	390.532	158.157	180.716	199.071	228.788	-0.817484	5e-05	0.000268034	206.267	213.466	210.76	301.24	47.6846	99.73	84.108	88.1983	-0.607376	1.1136e-10	2.44054e-09	124.418	126.055	122.102	179.522	24.9677	55.6273	40.5807	45.2539	-0.906508	1.18358e-09	1.46065e-08	GO:0000166,GO:0005524,GO:0005737,GO:0005856	cytoplasmic actin;note=iprscan%3BInterPro:IPR004000 : Actin/actin-like%3BPRINTS:PR00190%3B%3Bscore%3D1.8E-57%3Bquery 118-131%3Bdescription%3DActin/actin-like;note=iprscan%3BInterPro:IPR004000 : Actin/actin-like%3BPRINTS:PR00190%3B%3Bscore%3D1.8E-57%3Bquery 64-86%3Bdescription%3DActin/actin-like;note=iprscan%3BInterPro:IPR004000 : Actin/actin-like%3BPRINTS:PR00190%3B%3Bscore%3D1.8E-57%3Bquery 29-3…	Putative uncharacterized protein Smp_202970 [Source:UniProtKB/TrEMBL;Acc:G4VLN1]	gi|134133226|ref|NP_001077007.1|	POTE ankyrin domain family member E [Homo sapiens]
SmVG_025466:Smp_129820	14.1551	14.1297	16.866	14.7216	7.61789	7.94238	8.13038	10.2836	-0.817453	5e-05	0.000268034	14.1343	13.2875	15.8985	15.211	3.25383	5.34607	4.63544	5.79542	-0.769016	4.89243e-19	3.60101e-17	7.8907	7.46702	8.69504	8.77283	1.61351	2.90139	2.22803	2.84945	-0.959986	5.23912e-14	1.54419e-12		ATP binding cassette%2C sub family C (CFTR:MRP);Smp_129820	Putative multidrug resistance protein 1 (ATP-binding cassette C1) [Source:UniProtKB/TrEMBL;Acc:G4VS41]	gi|134142345|ref|NP_063953.2|	multidrug resistance-associated protein 1 isoform 3 [Homo sapiens]
SmVG_025466:Smp_189630	14.1551	14.1297	16.866	14.7216	7.61789	7.94238	8.13038	10.2836	-0.817453	5e-05	0.000268034	14.1343	13.2875	15.8985	15.211	3.25383	5.34607	4.63544	5.79542	-0.769016	4.89243e-19	3.60101e-17	7.8907	7.46702	8.69504	8.77283	1.61351	2.90139	2.22803	2.84945	-0.959986	5.23912e-14	1.54419e-12		multidrug resistance protein 1;Smp_189630
Smp_124240	49.6753	62.1473	59.7027	48.7551	40.137	22.7365	24.4602	37.85	-0.815293	5e-05	0.000268034	60.4418	44.9428	56.3739	50.2762	18.7835	16.5366	13.2126	21.4991	-0.759764	0.000584745	0.00260102	34.8303	26.2225	31.8949	29.9958	9.88848	9.32755	6.73385	11.0619	-0.882918	5.2283e-06	2.72437e-05	GO:0005890,GO:0006813,GO:0006814,GO:0016020,GO:0016021	sodium:potassium dependent atpase beta subunit;Smp_124240	Putative sodium/potassium-dependent atpase beta subunit; Sodium/potassium ATPase1 beta subunit [Source:UniProtKB/TrEMBL;Acc:C4PY08]	gi|4502277|ref|NP_001668.1|	sodium/potassium-transporting ATPase subunit beta-1 [Homo sapiens]
Smp_199460	8.37809	8.41105	8.76004	7.06864	4.04762	4.56135	3.19781	6.74851	-0.81383	0.01055	0.0275029	8.13711	7.24539	8.19937	6.14321	2.05898	2.11226	2.44197	3.8755	-0.772233	0.00927373	0.027065	7.11741	5.51416	6.27703	5.09089	1.58843	1.69882	1.92853	2.4721	-0.772489	0.00603559	0.0135716		zinc finger protein;Smp_199460	Zinc finger protein, putative [Source:UniProtKB/TrEMBL;Acc:G4M1U2]	_	_
SmVG_008022	4.40842	3.55883	3.24335	3.03203	0.723106	2.93874	1.11542	3.3254	-0.813745	0.00935	0.0249163	3.20411	3.85897	3.44805	3.21053	0.440962	0.812019	1.77556	2.03282	-0.938436	0.00658621	0.0203534	1.92009	2.35592	2.07355	2.06678	0.245809	0.427961	0.902707	1.03866	-0.834364	0.019232	0.0372522
SmVG_002760:Smp_172990	12.1234	16.0227	13.0246	10.4599	7.64758	6.01305	6.4574	9.27345	-0.812829	5e-05	0.000268034	13.9297	10.4313	11.1039	10.1452	3.28561	4.1952	3.4681	4.92191	-0.736626	8.60013e-12	2.29788e-10	8.22143	6.22795	6.43302	6.18279	1.7808	2.45797	1.84676	2.59636	-0.841385	3.93045e-08	3.41901e-07		leucine rich repeat containing protein 68;Smp_172990	Putative leucine rich repeat-containing [Source:UniProtKB/TrEMBL;Acc:G4V9Z8]	_	_
SmVG_002760:Smp_173000	12.1234	16.0227	13.0246	10.4599	7.64758	6.01305	6.4574	9.27345	-0.812829	5e-05	0.000268034	13.9297	10.4313	11.1039	10.1452	3.28561	4.1952	3.4681	4.92191	-0.736626	8.60013e-12	2.29788e-10	8.22143	6.22795	6.43302	6.18279	1.7808	2.45797	1.84676	2.59636	-0.841385	3.93045e-08	3.41901e-07		r specific enoyl coenzyme a hydratase;Smp_173000	Putative r-specific enoyl-CoA hydratase [Source:UniProtKB/TrEMBL;Acc:G4V9Z7]	_	_
Smp_149080	10.156	15.0577	11.9151	10.3362	5.72989	4.93107	7.27581	9.08567	-0.812709	5e-05	0.000268034	13.6828	8.78188	10.6017	10.0223	2.48637	4.5695	2.78491	4.82384	-0.795432	8.9474e-08	1.05662e-06	8.02104	5.20006	6.12779	6.12123	1.3252	2.6317	1.46052	2.54327	-0.898193	1.12918e-06	7.01184e-06		protein FAM160A1;note=predicted by EVM2;note=pfam_scan%3BPfam:PF10257.4%3B%3BE()%3D3.9E-47%3Bscore%3D160.7%3Bqu ery 2-259%3Bdescription%3DRAI16-like;note=iprscan%3BInterPro:IPR019384 : Retinoic acid induced 16-like protein%3BPfam:PF10257%3B%3Bscore%3D2.5E-12%3Bquery 1-259%3Bdescription%3DRetinoic acid induced 16-like protein;Smp_149080	Putative uncharacterized protein [Source:UniProtKB/TrEMBL;Acc:G4LWJ1]	_	_
Smp_201330	20.4405	16.6253	12.0288	12.8125	7.0566	7.05673	9.1399	11.9936	-0.812613	0.0002	0.000928806	15.2317	17.2458	10.5208	11.7953	2.48834	5.96625	3.43503	5.88286	-0.871168	1.03591e-05	7.57704e-05	10.4804	11.496	6.9616	8.35466	1.7184	3.68217	2.32526	3.74239	-0.905907	0.000150909	0.000536628		egg protein CP391S;Smp_201330	Putative uncharacterized protein Smp_201330 [Source:UniProtKB/TrEMBL;Acc:G4LV63]	_	_
Smp_103160	45.1873	47.967	51.1099	42.87	23.5032	21.9756	25.5683	35.5116	-0.812425	5e-05	0.000268034	62.1885	54.0695	61.9708	57.2307	13.521	23.1789	16.8044	26.6984	-0.790541	2.50994e-21	2.53223e-19	35.1481	30.798	34.4276	33.5754	6.87227	12.7578	8.3655	13.3978	-0.900289	3.80863e-09	4.2205e-08	GO:0001676,GO:0003824,GO:0004467,GO:0008152,GO:0016874	FAA4 Long-chain-fatty-acid--CoA ligase 4;Smp_103160	FAA4 Long-chain-fatty-acid--CoA ligase 4 [Source:UniProtKB/TrEMBL;Acc:C4QPH4]	gi|12669909|ref|NP_075266.1|	long-chain-fatty-acid--CoA ligase 4 isoform 2 [Homo sapiens]
Smp_186740	2.98005	3.65134	2.53126	2.57639	1.62238	1.83139	1.55202	1.68033	-0.812072	0.002	0.00683106	5.67433	5.10366	4.8778	5.65365	1.3976	2.63858	1.60802	2.2123	-0.614765	0.000154585	0.00082307	3.26151	2.9659	2.79331	3.35955	0.72047	1.47868	0.800476	1.13038	-0.777027	5.9157e-06	3.04555e-05	GO:0016020,GO:0016021	hypothetical protein;Smp_186740	Putative uncharacterized protein [Source:UniProtKB/TrEMBL;Acc:G4VR66]	gi|31542661|ref|NP_060672.2|	macoilin [Homo sapiens]
Smp_131100	9.25688	10.2328	9.58931	9.71782	4.4426	2.85521	6.7536	8.08277	-0.809661	5e-05	0.000268034	10.4086	9.49096	10.0651	11.3091	2.42307	5.12377	2.14184	4.77214	-0.767216	0.000144821	0.000775671	5.94408	5.49106	5.6595	6.72045	1.2243	2.85318	1.10488	2.40351	-0.865632	2.66468e-05	0.000115839	GO:0005319,GO:0005789,GO:0006869,GO:0016020,GO:0016021,GO:0034203	endoplasmic reticulum multispan transmembrane;Smp_131100	Endoplasmic reticulum multispan transmembrane protein-related [Source:UniProtKB/TrEMBL;Acc:G4VHG3]	gi|16418361|ref|NP_443091.1|	protein RFT1 homolog [Homo sapiens]
Smp_194900	4.50386	5.64946	5.52583	5.01031	2.08761	2.30863	3.24511	4.16461	-0.80938	0.00015	0.000719901	5.68153	4.36855	5.63842	5.79774	0.949366	2.47155	1.66582	2.53499	-0.753241	3.06262e-06	2.54445e-05	3.29856	2.56926	3.21156	3.49167	0.501947	1.41959	0.866621	1.33908	-0.835512	8.64902e-05	0.000328242	GO:0005515,GO:0005929,GO:0030991,GO:0035721,GO:0042384,GO:0061512	intraflagellar transport protein 122;note=annotation provided by Ricardo De Marco and Alan Wilson (University of York);note=manually curated;note=pfam_scan%3BPfam:PF00400.27%3B%3BE()%3D1.4E-8%3Bscore%3D34.1%3Bque ry 51-87%3Bdescription%3DWD40;note=iprscan%3BInterPro:IPR019781 : WD40 repeat%2C subgroup%3BPfam:PF00400%3B%3Bscore%3D1.4E-13%3Bquery 49-87%3Bdescription%3DWD40 repeat%2C subgroup;Smp_19…	Putative wd-repeat protein [Source:UniProtKB/TrEMBL;Acc:G4VHH0]	gi|256773256|ref|NP_443711.2|	intraflagellar transport protein 122 homolog isoform 1 [Homo sapiens]
SmVG_033617:Smp_142030	7.76464	8.73117	7.95298	9.72915	4.78585	4.24442	5.00984	5.47088	-0.808779	5e-05	0.000268034	10.364	8.72427	9.56071	12.6348	2.65888	4.57369	3.71215	4.01867	-0.550029	3.67429e-10	7.2513e-09	6.01881	5.04264	5.37752	7.52804	1.37541	2.5725	1.89329	2.07283	-0.791448	3.54136e-11	6.00281e-10		5' AMP activated protein kinase subunit gamma;Smp_142030	AMP-activated protein kinase, gamma regulatory subunit, putative [Source:UniProtKB/TrEMBL;Acc:G4M1A9]	gi|33186925|ref|NP_057287.2|	5'-AMP-activated protein kinase subunit gamma-2 isoform a [Homo sapiens]
SmVG_033617:Smp_212370	7.76464	8.73117	7.95298	9.72915	4.78585	4.24442	5.00984	5.47088	-0.808779	5e-05	0.000268034	10.364	8.72427	9.56071	12.6348	2.65888	4.57369	3.71215	4.01867	-0.550029	3.67429e-10	7.2513e-09	6.01881	5.04264	5.37752	7.52804	1.37541	2.5725	1.89329	2.07283	-0.791448	3.54136e-11	6.00281e-10		SNF4:AMP activated protein kinase gamma subunit;Smp_212370	AMP-activated protein kinase, gamma regulatory subunit, putative [Source:UniProtKB/TrEMBL;Acc:G4M1A8]	gi|332000015|ref|NP_001193638.1|	5'-AMP-activated protein kinase subunit gamma-1 isoform 3 [Homo sapiens]
Smp_022630	15.7781	18.1081	18.333	15.4841	9.83381	8.58545	8.29456	11.9416	-0.808556	0.0028	0.00911197	19.0493	15.3526	18.6126	17.051	4.80034	6.05372	4.94698	7.09069	-0.775067	2.73155e-14	1.13763e-12	11.5845	9.67184	11.2681	11.2524	2.69632	3.88531	3.00748	3.99225	-0.858029	7.83728e-12	1.53822e-10	GO:0005515,GO:0005543,GO:0016020	testis expressed sequence 2 protein;Smp_022630	Putative uncharacterized protein [Source:UniProtKB/TrEMBL;Acc:G4VEB7]	gi|38679909|ref|NP_060939.3|	testis-expressed sequence 2 protein [Homo sapiens]
Smp_041600	24.838	31.0072	28.086	29.9517	13.7172	16.2683	17.5023	17.5467	-0.808273	5e-05	0.000268034	39.6822	30.5938	36.1373	41.3658	8.80024	16.8465	13.8431	12.9531	-0.583919	2.75203e-11	6.62496e-10	22.178	17.302	19.8856	24.0997	4.4759	9.20545	6.79451	6.40115	-0.839883	2.90059e-12	6.28242e-11	GO:0000166,GO:0002161,GO:0004812,GO:0004822,GO:0005524,GO:0005737,GO:0005829,GO:0006412,GO:0006418,GO:0006428,GO:0006450,GO:0016874	isoleucyl tRNA synthetase%2C cytoplasmic;Smp_041600	Isoleucine--tRNA ligase [Source:UniProtKB/TrEMBL;Acc:G4VMZ5]	gi|94721241|ref|NP_002152.2|	isoleucyl-tRNA synthetase, cytoplasmic [Homo sapiens]
Smp_179230	5.81312	8.18789	6.02179	5.76325	3.18422	3.66882	3.04199	4.83333	-0.807993	0.00215	0.00728935	5.86041	3.80223	4.51043	4.33642	1.18009	1.88774	1.9142	2.10279	-0.596227	0.00728353	0.0221516	5.18063	3.72462	3.68854	4.01996	0.99276	1.42433	1.20829	1.62735	-0.816539	0.000131815	0.000477019	GO:0003756,GO:0005623,GO:0006457,GO:0016853,GO:0045454	protein disulfide isomerase TMX3;Smp_179230	Protein disulfide-isomerase, putative [Source:UniProtKB/TrEMBL;Acc:C4QPB5]	gi|21361657|ref|NP_005304.3|	protein disulfide-isomerase A3 precursor [Homo sapiens]
Smp_128110	26.7346	24.6426	23.2028	17.3725	6.87164	21.5156	7.72172	16.4422	-0.807166	5e-05	0.000268034	21.9371	22.4974	19.8263	17.1728	3.60728	5.78171	12.0639	9.1023	-0.771554	0.0117467	0.032943	12.8874	12.8221	11.6566	9.91346	1.60093	3.11185	5.86364	4.58325	-0.811773	0.00761285	0.0165935	GO:0005215,GO:0005887,GO:0006810,GO:0006833,GO:0009992,GO:0015250,GO:0015254,GO:0015793,GO:0016020,GO:0016021,GO:0034220	aquaporin 1;Smp_128110	Putative aquaporin [Source:UniProtKB/TrEMBL;Acc:G4VD98]	gi|37694062|ref|NP_932766.1|	aquaporin-1 isoform 1 [Homo sapiens]
Smp_153840	12.8574	11.7261	14.1841	13.3421	5.91914	7.53449	7.30935	9.02829	-0.806663	5e-05	0.000268034	11.2973	11.0253	12.9071	13.3677	2.33311	4.80848	4.14072	4.87817	-0.74728	7.31056e-13	2.31231e-11	6.419	6.30014	7.17072	7.85527	1.18787	2.64064	2.03499	2.44461	-0.946232	1.13275e-10	1.71653e-09	GO:0005488,GO:0005515	neurobeachin;Smp_153840	Putative neurobeachin [Source:UniProtKB/TrEMBL;Acc:G4VJ28]	gi|62422577|ref|NP_056493.3|	neurobeachin isoform 1 [Homo sapiens]
SmVG_002537:Smp_092990	9.34846	10.2258	8.78413	8.81011	4.95508	4.43348	6.16186	5.70797	-0.80605	5e-05	0.000268034	15.0159	15.5799	13.2339	15.2217	3.58573	7.78812	4.94923	7.61029	-0.603093	4.10324e-08	5.25386e-07	8.62194	8.99693	7.45229	9.02789	1.85391	4.3367	2.46158	3.84762	-0.667179	3.2487e-05	0.000138558		LYR motif containing protein 7;note=predicted by EVM2;note=trans_spliced (SO:0000870);note=pfam_scan%3BPfam:PF05347.10%3B%3BE()%3D1.2E-11%3Bscore%3D44.1%3Bqu ery 8-63%3Bdescription%3DComplex1_LYR;note=iprscan%3BInterPro:IPR008011 : Complex 1 LYR protein%3BPfam:PF05347%3B%3Bscore%3D5.7E-8%3Bquery 4-69%3Bdescription%3DComplex 1 LYR protein;Smp_092990	Putative uncharacterized protein [Source:UniProtKB/TrEMBL;Acc:G4V859]	gi|91176333|ref|NP_859056.2|	LYR motif-containing protein 7 [Homo sapiens]
SmVG_002537:Smp_173050	9.34846	10.2258	8.78413	8.81011	4.95508	4.43348	6.16186	5.70797	-0.80605	5e-05	0.000268034	15.0159	15.5799	13.2339	15.2217	3.58573	7.78812	4.94923	7.61029	-0.603093	4.10324e-08	5.25386e-07	8.62194	8.99693	7.45229	9.02789	1.85391	4.3367	2.46158	3.84762	-0.667179	3.2487e-05	0.000138558		protein prune;Smp_173050.2	Putative uncharacterized protein [Source:UniProtKB/TrEMBL;Acc:G4V860]	gi|24308263|ref|NP_067045.1|	protein prune homolog [Homo sapiens]
SmVG_002537:Smp_173050.2	9.34846	10.2258	8.78413	8.81011	4.95508	4.43348	6.16186	5.70797	-0.80605	5e-05	0.000268034	15.0159	15.5799	13.2339	15.2217	3.58573	7.78812	4.94923	7.61029	-0.603093	4.10324e-08	5.25386e-07	8.62194	8.99693	7.45229	9.02789	1.85391	4.3367	2.46158	3.84762	-0.667179	3.2487e-05	0.000138558		protein prune;Smp_173050.2
Smp_176710	4.62203	6.39802	7.39813	6.93643	4.24586	2.66319	3.62312	3.97437	-0.805544	5e-05	0.000268034	4.30485	2.03881	3.82647	3.85925	0.699835	0.93751	0.503263	1.07867	-1.10204	0.000129492	0.000704531	2.73631	1.81042	2.89175	3.04593	0.691602	1.02796	0.516531	0.952392	-0.92443	1.0042e-05	4.92173e-05	GO:0000122,GO:0001078,GO:0003700,GO:0005634,GO:0006355,GO:0007623,GO:0043565,GO:0019031	transcriptional factor nfil3:e4bp4;Smp_176710	Putative transcriptional factor nfil3/e4bp4 [Source:UniProtKB/TrEMBL;Acc:G4VLQ0]	_	_
Smp_179560	17.9892	18.4878	17.6358	14.9916	7.06735	9.00609	9.12543	14.3437	-0.805372	5e-05	0.000268034	18.4122	16.7499	16.3707	16.2974	3.06404	6.18901	5.50942	8.52824	-0.848609	1.25736e-12	3.83202e-11	10.5042	9.67565	9.20448	9.60888	1.56779	3.44987	2.76491	4.28096	-0.888194	1.50986e-05	7.04192e-05	GO:0003993,GO:0016311	multiple inositol polyphosphate phosphatase;Smp_179560	Multiple inositol polyphosphate phosphatase-related [Source:UniProtKB/TrEMBL;Acc:G4M1S9]	gi|19923761|ref|NP_004888.2|	multiple inositol polyphosphate phosphatase 1 isoform 1 precursor [Homo sapiens]
SmVG_016229:Smp_051760	4.43495	4.7071	5.47307	4.55071	2.3143	2.43898	2.66483	3.55401	-0.804693	5e-05	0.000268034	4.23109	3.90647	4.83869	4.49314	0.957609	1.78419	1.29389	2.03715	-0.762991	3.55237e-15	1.67635e-13	2.46195	2.27488	2.76542	2.7296	0.515455	1.02586	0.679709	1.05396	-0.862434	3.83923e-08	3.34986e-07		hypothetical protein;note=predicted by EVM2;Smp_051760	Putative uncharacterized protein [Source:UniProtKB/TrEMBL;Acc:G4VI49]	_	_
SmVG_016229:Smp_149830	4.43495	4.7071	5.47307	4.55071	2.3143	2.43898	2.66483	3.55401	-0.804693	5e-05	0.000268034	4.23109	3.90647	4.83869	4.49314	0.957609	1.78419	1.29389	2.03715	-0.762991	3.55237e-15	1.67635e-13	2.46195	2.27488	2.76542	2.7296	0.515455	1.02586	0.679709	1.05396	-0.862434	3.83923e-08	3.34986e-07		hypothetical protein;note=predicted by EVM2;Smp_149830	Putative uncharacterized protein [Source:UniProtKB/TrEMBL;Acc:G4VI50]	_	_
SmVG_016229:Smp_149840	4.43495	4.7071	5.47307	4.55071	2.3143	2.43898	2.66483	3.55401	-0.804693	5e-05	0.000268034	4.23109	3.90647	4.83869	4.49314	0.957609	1.78419	1.29389	2.03715	-0.762991	3.55237e-15	1.67635e-13	2.46195	2.27488	2.76542	2.7296	0.515455	1.02586	0.679709	1.05396	-0.862434	3.83923e-08	3.34986e-07		hypothetical protein;note=predicted by EVM2;Smp_149840	Putative uncharacterized protein [Source:UniProtKB/TrEMBL;Acc:G4VI48]	_	_
SmVG_016229:Smp_149850	4.43495	4.7071	5.47307	4.55071	2.3143	2.43898	2.66483	3.55401	-0.804693	5e-05	0.000268034	4.23109	3.90647	4.83869	4.49314	0.957609	1.78419	1.29389	2.03715	-0.762991	3.55237e-15	1.67635e-13	2.46195	2.27488	2.76542	2.7296	0.515455	1.02586	0.679709	1.05396	-0.862434	3.83923e-08	3.34986e-07		hypothetical protein;note=trans_spliced (SO:0000870);Smp_149850	Putative uncharacterized protein [Source:UniProtKB/TrEMBL;Acc:G4VI47]	_	_
SmVG_022083:Smp_127790	2.11089	2.10667	2.24076	1.9586	1.12357	1.04626	0.895728	1.76159	-0.80212	0.0008	0.0031153	1.84861	1.76071	1.93691	1.89206	0.425791	0.520829	0.475451	0.794076	-0.925478	3.95263e-07	3.94017e-06	1.10646	1.04505	1.16452	1.15697	0.23836	0.367927	0.255986	0.423513	-1.01267	1.01935e-07	8.11035e-07		hypothetical protein;Smp_127790	Putative uncharacterized protein [Source:UniProtKB/TrEMBL;Acc:G4VMN4]	_	_
SmVG_022083:Smp_127800	2.11089	2.10667	2.24076	1.9586	1.12357	1.04626	0.895728	1.76159	-0.80212	0.0008	0.0031153	1.84861	1.76071	1.93691	1.89206	0.425791	0.520829	0.475451	0.794076	-0.925478	3.95263e-07	3.94017e-06	1.10646	1.04505	1.16452	1.15697	0.23836	0.367927	0.255986	0.423513	-1.01267	1.01935e-07	8.11035e-07		histone lysine N methyltransferase SETDB;Smp_127800	Putative sap-97 [Source:UniProtKB/TrEMBL;Acc:G4VMN5]	_	_
Smp_176800	13.0734	16.5625	16.5287	16.296	8.63875	8.27714	8.92332	10.0021	-0.801321	5e-05	0.000268034	12.643	9.69685	12.4224	13.6546	2.94415	4.90043	3.82659	4.60447	-0.67063	2.48922e-13	8.72183e-12	7.367	5.66519	7.0909	8.14588	1.55231	2.78179	1.94687	2.37771	-0.908756	8.82991e-14	2.54141e-12	GO:0034399,GO:0051292	protein elys;Smp_176800	Putative uncharacterized protein [Source:UniProtKB/TrEMBL;Acc:G4LV09]	gi|262359929|ref|NP_056261.4|	protein ELYS [Homo sapiens]
Smp_075420	20.359	30.9487	24.5658	17.5735	15.1008	7.26707	13.0489	18.2474	-0.800192	0.02135	0.0496277	21.5645	14.1226	17.0874	13.7725	5.01969	6.73557	3.32092	7.81756	-0.838833	0.000430212	0.00199713	12.8778	8.55336	10.003	8.45126	2.72897	3.94281	1.8185	4.11751	-0.849013	0.000197552	0.00067749		hypothetical protein;note=predicted by EVM2;Smp_075420	Putative uncharacterized protein [Source:UniProtKB/TrEMBL;Acc:G4LX23]	_	_
Smp_200060	10.2741	12.3444	15.4017	15.1218	6.25156	9.4405	5.66909	9.18999	-0.798628	5e-05	0.000268034	9.85987	7.61873	10.8499	12.0819	1.89384	2.70755	3.89266	4.97208	-0.782426	4.10085e-05	0.000255278	9.60409	8.02527	11.2326	12.0429	1.96809	2.5403	3.23226	3.71145	-1.01375	2.80761e-06	1.58219e-05		hypothetical protein;Smp_200060
Smp_213810	17.6476	24.0581	22.068	21.9179	9.7503	13.5374	12.7261	13.2671	-0.798126	5e-05	0.000268034	21.0981	15.1699	19.0912	20.9737	3.81683	8.09657	7.28877	6.75054	-0.660762	2.24718e-06	1.92947e-05	11.9047	8.64494	10.5308	12.2515	1.98745	4.45969	3.68953	3.38777	-0.889391	2.51626e-09	2.90862e-08	GO:0000775,GO:0005634,GO:0007067	centromere:kinetochore protein zw10;Smp_213810
Smp_173100	4.27474	4.36728	4.6734	3.76301	2.25817	3.079	1.86756	2.63051	-0.796141	0.00025	0.00113276	3.516	3.3304	3.73939	3.3177	0.859127	1.06434	1.49659	1.30613	-0.718679	2.57729e-06	2.18091e-05	2.02651	1.92231	2.09965	1.95407	0.4486	0.591961	0.728628	0.654151	-0.897936	1.10366e-06	6.87446e-06	GO:0005515,GO:0006950,GO:0009415,GO:0016020,GO:0016021	cell adhesion molecule;Smp_173100	Axon guidance protein [Source:UniProtKB/TrEMBL;Acc:G4VHL0]	_	_
Smp_033600	23.6428	27.9079	26.9639	26.7388	13.5805	13.7371	16.8182	16.4853	-0.795975	5e-05	0.000268034	31.3652	26.6058	30.0738	33.0509	7.43064	14.612	10.9073	12.0782	-0.58076	1.33994e-12	4.06251e-11	17.4926	14.9704	16.4532	19.1329	3.71893	7.88238	5.25623	5.92523	-0.772056	2.19278e-11	3.86191e-10	GO:0003723,GO:0004525,GO:0004530,GO:0005634,GO:0005737,GO:0006309,GO:0006396,GO:0016442,GO:0016787,GO:0030422,GO:0031054,GO:0090501,GO:0090502	Dicer 2;Smp_033600	Ribonuclease III, putative [Source:UniProtKB/TrEMBL;Acc:G4LVA9]	_	_
Smp_158600	95.1182	102.09	108.308	102.453	49.9977	51.7842	56.1628	77.0393	-0.7959	5e-05	0.000268034	93.4	83.6964	96.0405	100.784	22.4929	38.6051	30.9886	42.9563	-0.67031	5.91934e-16	3.14882e-14	52.5311	47.3568	52.9871	58.4816	11.3894	21.114	15.1808	21.3452	-0.805207	2.28302e-09	2.66414e-08	GO:0004576,GO:0004579,GO:0006486,GO:0008250,GO:0016020,GO:0016021,GO:0016740,GO:0018279,GO:0043687	dolichyl diphosphooligosaccharide protein;Smp_158600	Oligosaccharyl transferase, putative [Source:UniProtKB/TrEMBL;Acc:G4LZ93]	gi|22749415|ref|NP_689926.1|	dolichyl-diphosphooligosaccharide--protein glycosyltransferase subunit STT3A [Homo sapiens]
SmVG_031568:Smp_005360	6.68412	7.30814	8.21862	7.28277	3.90748	3.75892	3.73667	5.58967	-0.795486	5e-05	0.000268034	8.33118	7.17783	8.91357	8.83404	2.08783	3.22673	2.61898	3.57026	-0.700395	1.31692e-11	3.39471e-10	4.71957	4.14065	4.9561	5.20906	1.07464	1.76513	1.34325	1.82032	-0.861066	1.51902e-10	2.212e-09		hypothetical protein;note=predicted by EVM2;Smp_005360	Putative uncharacterized protein [Source:UniProtKB/TrEMBL;Acc:G4LZK3]	_	_
SmVG_031568:Smp_124970	6.68412	7.30814	8.21862	7.28277	3.90748	3.75892	3.73667	5.58967	-0.795486	5e-05	0.000268034	8.33118	7.17783	8.91357	8.83404	2.08783	3.22673	2.61898	3.57026	-0.700395	1.31692e-11	3.39471e-10	4.71957	4.14065	4.9561	5.20906	1.07464	1.76513	1.34325	1.82032	-0.861066	1.51902e-10	2.212e-09		Phosphatidylinositol 4 phosphate 5 kinase type 1;Smp_124970	Phosphatidylinositol-4-phosphate 5-kinase type I, putative [Source:UniProtKB/TrEMBL;Acc:G4LZK4]	gi|31317309|ref|NP_036530.1|	phosphatidylinositol-4-phosphate 5-kinase type-1 gamma isoform 2 [Homo sapiens]
Smp_123230	23.9188	31.135	29.5935	34.1901	13.869	19.8453	12.7146	22.0677	-0.794885	5e-05	0.000268034	31.9968	25.7697	31.3747	40.738	6.1621	10.7029	13.4514	14.6375	-0.682936	2.73484e-05	0.000177416	19.2252	15.5119	18.2841	24.989	3.36874	6.24442	6.95291	7.66805	-0.868682	9.11142e-06	4.51205e-05	GO:0005515,GO:0044458	leucine rich repeat containing protein 50;note=predicted by EVM2;Smp_123230	Putative uncharacterized protein [Source:UniProtKB/TrEMBL;Acc:G4VLK8]	gi|4506013|ref|NP_002703.1|	protein phosphatase 1 regulatory subunit 7 [Homo sapiens]
Smp_136930	10.8715	11.8522	8.78675	8.58046	5.72368	3.69885	6.31771	7.36928	-0.794789	5e-05	0.000268034	9.91588	8.72503	7.1516	7.81281	2.23934	3.87467	2.07296	3.79768	-0.745507	5.09143e-06	4.01246e-05	5.76345	5.06522	4.06943	4.66331	1.13051	2.16295	1.00152	1.93609	-0.850399	4.09008e-06	2.18571e-05		hypothetical protein;Smp_136930	Putative uncharacterized protein [Source:UniProtKB/TrEMBL;Acc:G4VHC1]	_	_
SmVG_023460	4.01051	5.41306	5.19685	4.94325	2.70301	2.95393	3.40715	2.21538	-0.794478	0.00345	0.0108794	4.07373	3.02705	3.85172	4.21449	0.845723	1.95707	1.40117	1.21288	-0.55446	0.0109165	0.0309785	2.48993	1.78209	2.22148	2.55239	0.48028	1.13823	0.687956	0.623693	-0.782829	0.000301955	0.000991149
Smp_154730	16.7818	18.0627	16.0722	15.2318	10.0633	8.08386	8.80518	11.1983	-0.793999	5e-05	0.000268034	12.4167	11.304	11.0705	11.5772	3.24445	4.48822	3.49627	4.6066	-0.699891	9.26512e-10	1.67588e-08	7.28108	6.68325	6.40589	7.08515	1.74997	2.66426	1.96785	2.51074	-0.829276	1.22499e-10	1.83684e-09	GO:0000166,GO:0003676	rna binding protein musashi;note=pfam_scan%3BPfam:PF00076.17%3B%3BE()%3D2.1E-16%3Bscore%3D59.1%3Bqu ery 81-140%3Bdescription%3DRRM_1;note=pfam_scan%3BPfam:PF00076.17%3B%3BE()%3D2.2E-19%3Bscore%3D68.7%3Bqu ery 171-236%3Bdescription%3DRRM_1;note=iprscan%3BInterPro:IPR000504 : RNA recognition motif%2C RNP-1%3BSMART:SM00360%3B%3Bscore%3D1.1E-24%3Bquery 170-242%3Bdescription%3DRNA recognition motif%2C…
Smp_132320	6.22876	7.48176	6.93577	7.64516	3.50956	3.82202	4.39945	4.59118	-0.79353	5e-05	0.000268034	7.41385	5.69243	6.51108	7.92346	1.5201	3.10313	2.34489	2.72415	-0.637392	5.40495e-11	1.25256e-09	4.32289	3.32571	3.75208	4.80795	0.824387	1.72257	1.17136	1.39592	-0.876415	1.69583e-11	3.0557e-10	GO:0005509,GO:0005886,GO:0007155,GO:0007156,GO:0016020,GO:0016021	protocadherin gamma a4;Smp_132320	Putative cadherin [Source:UniProtKB/TrEMBL;Acc:G4VGM7]	gi|11056024|ref|NP_061741.1|	protocadherin gamma-A5 isoform 1 precursor [Homo sapiens]
Smp_192400	3.59873	3.81345	3.30483	3.55451	2.27927	1.48352	1.99507	2.48714	-0.791549	5e-05	0.000268034	3.05437	2.75103	2.6579	3.14312	0.904369	1.21854	0.780161	1.25869	-0.651622	6.07145e-07	5.88197e-06	1.78125	1.60573	1.52285	1.88936	0.473067	0.686012	0.410447	0.644442	-0.788721	1.51496e-07	1.15193e-06		hypothetical protein;Smp_192400	Putative uncharacterized protein [Source:UniProtKB/TrEMBL;Acc:G4VKF8]	_	_
Smp_199870	9.84074	12.4678	11.8484	11.7077	4.24891	8.20245	7.83855	6.21711	-0.791008	0.0032	0.0102236	13.9382	12.5942	15.8692	17.0714	2.06039	5.17293	5.84191	4.78344	-0.78764	0.000436741	0.00202343	8.99173	7.76412	9.32601	11.6476	1.3798	3.58778	3.38666	2.59176	-0.855077	8.86581e-05	0.000334398		hypothetical protein;Smp_199870
Smp_163950	10.6823	13.2534	14.1002	14.3296	7.25997	6.5054	7.86019	8.67824	-0.789119	5e-05	0.000268034	10.4926	8.18986	11.0953	12.3919	2.50652	4.32199	3.023	4.13619	-0.686974	6.33839e-11	1.45163e-09	6.07738	4.7508	6.36825	7.46529	1.33414	2.44354	1.54939	2.14604	-0.928316	2.76949e-10	3.84368e-09		hypothetical protein;Smp_163950	Putative uncharacterized protein [Source:UniProtKB/TrEMBL;Acc:G4VL45]	_	_
SmVG_007736:Smp_180910	21.398	23.0598	27.8781	26.3792	12.8265	12.083	13.624	18.629	-0.788202	5e-05	0.000268034	19.6767	17.4846	23.2557	24.1363	5.00872	8.49643	6.39257	9.60977	-0.692558	1.82428e-15	9.04641e-14	11.0354	9.89257	12.7885	13.9939	2.53625	4.63287	3.16053	4.76377	-0.853673	1.57899e-08	1.50813e-07		pumilio;Smp_180910.2	Putative pumilio [Source:UniProtKB/TrEMBL;Acc:G4VE38]	gi|66932909|ref|NP_001018494.1|	pumilio homolog 1 isoform 1 [Homo sapiens]
SmVG_007736:Smp_180910.2	21.398	23.0598	27.8781	26.3792	12.8265	12.083	13.624	18.629	-0.788202	5e-05	0.000268034	19.6767	17.4846	23.2557	24.1363	5.00872	8.49643	6.39257	9.60977	-0.692558	1.82428e-15	9.04641e-14	11.0354	9.89257	12.7885	13.9939	2.53625	4.63287	3.16053	4.76377	-0.853673	1.57899e-08	1.50813e-07		pumilio;Smp_180910.2
SmVG_007736:Smp_180920	21.398	23.0598	27.8781	26.3792	12.8265	12.083	13.624	18.629	-0.788202	5e-05	0.000268034	19.6767	17.4846	23.2557	24.1363	5.00872	8.49643	6.39257	9.60977	-0.692558	1.82428e-15	9.04641e-14	11.0354	9.89257	12.7885	13.9939	2.53625	4.63287	3.16053	4.76377	-0.853673	1.57899e-08	1.50813e-07		hypothetical protein;note=tmhmm%3B%3Bquery 1-111%3B;note=%3Bquery 1-30%3B;note=%3Bquery 111-111%3B;note=%3Bquery 31-53%3B;note=%3Bquery 88-110%3B;note=%3Bquery 54-87%3B;Smp_180920	Putative uncharacterized protein [Source:UniProtKB/TrEMBL;Acc:G4VE40]	_	_
SmVG_000311	9.34607	10.4985	8.03875	12.2358	2.46059	7.48776	6.23165	7.06397	-0.787434	0.0076	0.0210673	54.5074	42.6921	54.4486	61.5258	12.8691	19.1297	21.4391	17.6094	-0.578884	5.40406e-05	0.000326167	50.1544	35.5692	43.3748	53.4121	9.34617	14.3839	13.4094	12.4765	-1.01265	5.42266e-12	1.12523e-10
Smp_212820	7.25437	10.3717	9.62251	11.1605	5.65346	4.29444	6.20584	6.10051	-0.787366	5e-05	0.000268034	11.4221	7.94204	10.4884	14.0018	2.81711	5.01547	3.52207	4.81438	-0.547227	1.12471e-06	1.02999e-05	6.53019	4.58816	5.82913	8.24799	1.44032	2.84313	1.74123	2.45192	-0.766288	2.86822e-06	1.60789e-05		zinc finger protein;Smp_212820
Smp_079560	21.5133	33.5911	36.0382	34.7903	11.9751	20.4988	19.3637	21.187	-0.7862	5e-05	0.000268034	36.1657	21.5242	36.6287	37.9446	6.51652	14.8233	13.8176	13.8558	-0.572101	0.00830986	0.0246891	19.9052	11.8073	19.7369	21.3392	2.96618	7.66862	6.40694	6.54946	-0.777183	0.000174752	0.00060756	GO:0000166,GO:0003677,GO:0003678,GO:0005524,GO:0005634,GO:0006260,GO:0006270,GO:0032508,GO:0042555	DNA replication licensing factor MCM2;Smp_079560	Putative DNA replication licensing factor MCM2 [Source:UniProtKB/TrEMBL;Acc:G4V7V1]	gi|33356547|ref|NP_004517.2|	DNA replication licensing factor MCM2 [Homo sapiens]
Smp_098710	25.5945	29.593	33.2787	28.6861	16.2914	17.669	14.3818	19.6759	-0.784395	5e-05	0.000268034	32.1883	27.4811	35.9016	35.1478	7.76932	10.9032	11.8967	12.7928	-0.711455	2.24119e-11	5.56872e-10	18.3223	15.8306	20.1017	20.729	4.00945	6.03441	5.92103	6.43408	-0.921668	1.00101e-11	1.91217e-10	GO:0003756,GO:0005615,GO:0006457,GO:0016020,GO:0016021,GO:0016491,GO:0016971,GO:0016972,GO:0030173,GO:0055114	quiescin q6 sulfhydryl oxidase;Smp_098710	Quiescin q6-related sulfhydryl oxidase [Source:UniProtKB/TrEMBL;Acc:G4M193]	gi|13325075|ref|NP_002817.2|	sulfhydryl oxidase 1 isoform a [Homo sapiens]
Smp_166790	29.475	33.9127	32.0218	28.5559	19.0506	19.9885	15.8907	17.1249	-0.782775	5e-05	0.000268034	46.6427	40.7846	40.5655	41.3019	12.59	16.1944	18.8466	14.4805	-0.559017	4.39322e-08	5.5703e-07	27.3426	24.2318	23.3481	24.94	6.67294	9.29369	9.6656	7.60389	-0.767074	3.54719e-09	3.97183e-08	GO:0005385,GO:0005623,GO:0006882,GO:0016020,GO:0016021,GO:0030001,GO:0046873,GO:0055085,GO:0071577	zinc transporter ZIP13;Smp_166790	Putative solute carrier family 39 (Zinc transporter) [Source:UniProtKB/TrEMBL;Acc:G4VGI2]	gi|55741750|ref|NP_065075.1|	zinc transporter ZIP10 precursor [Homo sapiens]
SmVG_029037:Smp_014440	6.91494	7.04636	8.79103	8.70636	4.23066	3.05164	5.59927	5.40437	-0.782725	0.00045	0.00189572	6.43535	5.86282	7.47674	8.34463	1.70298	3.5743	1.62585	2.9752	-0.682052	0.000313963	0.00152335	3.62314	3.2801	4.16762	4.83987	0.828182	1.96683	0.784947	1.4952	-0.862893	1.05435e-05	5.144e-05		hypothetical protein;Smp_014440	Putative uncharacterized protein [Source:UniProtKB/TrEMBL;Acc:G4LXN4]	_	_
SmVG_029037:Smp_129990	6.91494	7.04636	8.79103	8.70636	4.23066	3.05164	5.59927	5.40437	-0.782725	0.00045	0.00189572	6.43535	5.86282	7.47674	8.34463	1.70298	3.5743	1.62585	2.9752	-0.682052	0.000313963	0.00152335	3.62314	3.2801	4.16762	4.83987	0.828182	1.96683	0.784947	1.4952	-0.862893	1.05435e-05	5.144e-05		GTPase activating protein and VPS9;Smp_129990	Rab GDP/GTP exchange factor, putative [Source:UniProtKB/TrEMBL;Acc:G4LXN3]	_	_
Smp_068440	40.4469	46.2408	51.7645	45.0083	25.9554	24.0021	23.3609	33.3331	-0.782564	5e-05	0.000268034	43.1956	35.3359	45.1657	42.4138	10.8343	15.1021	13.2181	18.0666	-0.717927	8.56605e-19	6.18818e-17	24.0717	19.7882	25.0086	24.6074	5.44655	8.14333	6.40267	8.81088	-0.880479	8.6319e-11	1.34007e-09	GO:0000166,GO:0003676,GO:0004004,GO:0004386,GO:0005524,GO:0006413,GO:0007059,GO:0008026,GO:0010468,GO:0010501,GO:0016787,GO:0036464	DEAD (Asp Glu Ala Asp) box polypeptide 3;Smp_068440	Putative dead box ATP-dependent RNA helicase [Source:UniProtKB/TrEMBL;Acc:G4VBD5]	gi|169881239|ref|NP_001116137.1|	ATP-dependent RNA helicase DDX3Y [Homo sapiens]
Smp_160500	3.12293	4.05507	4.10664	3.82556	1.25537	2.53209	2.39103	2.60792	-0.782175	0.0003	0.00132569	3.6641	2.82189	3.80168	3.79995	0.512335	1.58968	1.52717	1.43895	-0.714212	0.00639504	0.0198781	2.09611	1.61575	2.10795	2.21647	0.256919	0.879009	0.775582	0.709789	-0.829865	0.000506156	0.00155268	GO:0005515	t complex associated testis expressed protein;Smp_160500	Nalp (Nacht, leucine rich repeat and pyrin domain containing)-related [Source:UniProtKB/TrEMBL;Acc:G4V599]	gi|187608777|ref|NP_038460.4|	tonsoku-like protein [Homo sapiens]
Smp_082740	60.1214	68.1216	65.5022	59.5843	38.1141	19.1278	37.9772	52.137	-0.781709	5e-05	0.000268034	108.496	94.4945	97.7111	98.3896	26.7259	40.349	19.4905	48.2229	-0.82689	2.63132e-05	0.000171748	63.0608	54.9766	55.6361	58.6487	14.0742	22.7572	9.81054	24.7391	-0.863687	4.695e-05	0.000191826	GO:0005515	Na(+):H(+) exchange regulatory cofactor;Smp_082740	Putative pdz domain containing protein [Source:UniProtKB/TrEMBL;Acc:G4VC85]	gi|4759140|ref|NP_004243.1|	Na(+)/H(+) exchange regulatory cofactor NHE-RF1 [Homo sapiens]
SmVG_000351:Smp_133140	9.62344	9.97556	11.1998	9.11468	4.896	6.15855	5.72636	6.45623	-0.780445	0.00675	0.0191414	9.52637	8.62834	9.9729	8.93361	2.15224	3.75603	3.49367	3.65828	-0.684275	5.79503e-09	8.84214e-08	5.26377	4.78212	5.39169	5.07508	1.04822	1.989	1.63726	1.74473	-0.850224	2.27022e-09	2.65644e-08		centrosomal protein of 104 kDa;note=predicted by EVM2;Smp_133140	Putative uncharacterized protein [Source:UniProtKB/TrEMBL;Acc:G4V8D9]	gi|7662180|ref|NP_055519.1|	centrosomal protein of 104 kDa [Homo sapiens]
SmVG_000351:Smp_178710	9.62344	9.97556	11.1998	9.11468	4.896	6.15855	5.72636	6.45623	-0.780445	0.00675	0.0191414	9.52637	8.62834	9.9729	8.93361	2.15224	3.75603	3.49367	3.65828	-0.684275	5.79503e-09	8.84214e-08	5.26377	4.78212	5.39169	5.07508	1.04822	1.989	1.63726	1.74473	-0.850224	2.27022e-09	2.65644e-08		centrosomal protein of 104 kDa;note=predicted by EVM2;note=pfam_scan%3BPfam:PF02151.14%3B%3BE()%3D2.7E-5%3Bscore%3D23.3%3Bque ry 234-262%3Bdescription%3DUVR;note=pfam_scan%3BPfam:PF02151.14%3B%3BE()%3D8.5E-6%3Bscore%3D24.9%3Bque ry 194-227%3Bdescription%3DUVR;Smp_178710	Putative uncharacterized protein [Source:UniProtKB/TrEMBL;Acc:G4V8E2]	gi|7662180|ref|NP_055519.1|	centrosomal protein of 104 kDa [Homo sapiens]
Smp_146700	13.5784	17.7564	16.0258	13.6558	8.5842	7.78858	7.52976	11.6359	-0.779817	5e-05	0.000268034	14.4657	10.8528	13.2834	12.0965	3.20277	4.43162	3.86397	5.92922	-0.775637	1.19925e-14	5.29614e-13	8.43016	6.21445	7.41565	7.0553	1.57193	2.41285	1.82795	3.04317	-0.921977	1.68309e-07	1.26741e-06	GO:0005737,GO:0008270,GO:0016020,GO:0016021,GO:0016409,GO:0016740,GO:0016746,GO:0018345,GO:0019706,GO:0046872	zinc finger protein;Smp_146700	_	gi|37594447|ref|NP_932162.1|	probable palmitoyltransferase ZDHHC16 isoform 4 [Homo sapiens]
SmVG_008822:Smp_128730	48.5194	56.386	55.8889	45.4162	28.3605	28.1587	27.8879	35.7078	-0.779703	5e-05	0.000268034	57.8785	46.1214	54.3901	47.3414	12.3248	19.7151	16.1192	21.0825	-0.766858	4.35753e-21	4.13769e-19	32.5929	25.9352	30.1327	27.5992	6.23715	10.6827	7.88562	10.6164	-0.919073	1.49314e-11	2.73063e-10		protein transport protein Sec24A;Smp_128730	Sec24-related A, B [Source:UniProtKB/TrEMBL;Acc:G4VC64]	gi|116174780|ref|NP_068817.1|	protein transport protein Sec24A [Homo sapiens]
SmVG_008822:Smp_128740	48.5194	56.386	55.8889	45.4162	28.3605	28.1587	27.8879	35.7078	-0.779703	5e-05	0.000268034	57.8785	46.1214	54.3901	47.3414	12.3248	19.7151	16.1192	21.0825	-0.766858	4.35753e-21	4.13769e-19	32.5929	25.9352	30.1327	27.5992	6.23715	10.6827	7.88562	10.6164	-0.919073	1.49314e-11	2.73063e-10		protein transport protein sec24b;Smp_128740	Sec24-related A, B [Source:UniProtKB/TrEMBL;Acc:G4VC63]	gi|112382212|ref|NP_006314.2|	protein transport protein Sec24B isoform a [Homo sapiens]
Smp_198690	6.86344	10.4763	8.91505	9.88606	5.42883	4.98952	5.78686	4.85535	-0.779087	5e-05	0.000268034	11.2235	8.03447	10.8278	12.8952	2.68175	5.44198	4.29116	3.89756	-0.476005	8.30483e-05	0.000477599	6.40808	4.60203	6.02214	7.6103	1.36645	3.01622	2.10942	1.94885	-0.739985	5.05778e-06	2.64677e-05	GO:0003824,GO:0004421,GO:0008152,GO:0008299,GO:0016740,GO:0016746	HMG-CoA synthase;Smp_198690	HMG-CoA synthase [Source:UniProtKB/TrEMBL;Acc:G4LWY6]	_	_
SmVG_032581	25.6049	29.2077	28.9396	26.9987	12.4131	11.9457	15.8082	24.3736	-0.779041	0.00025	0.00113276	26.6208	24.8477	27.6758	26.5928	3.82837	7.68963	4.6859	10.003	-1.16545	2.13654e-13	7.62315e-12	21.9858	20.0875	22.3229	22.6953	3.7882	7.59286	4.61755	8.6133	-1.03518	8.14671e-08	6.60438e-07
SmVG_029163:Smp_086920	5.25848	6.81483	6.34783	5.65805	2.67185	4.0411	3.66693	3.66258	-0.777991	5e-05	0.000268034	9.05557	6.95856	8.23339	8.64083	2.17865	4.15989	3.33986	3.7029	-0.513368	7.86594e-09	1.1697e-07	5.24807	4.06088	4.81659	5.2092	1.18411	2.42646	1.76038	2.07716	-0.570568	8.45381e-06	4.22297e-05		family with sequence similarity 40%2C member A;note=predicted by EVM2;note=pfam_scan%3BPfam:PF11882.3%3B%3BE()%3D3.1E-32%3Bscore%3D112.0%3Bqu ery 1-110%3Bdescription%3DDUF3402;Smp_086920	Putative uncharacterized protein [Source:UniProtKB/TrEMBL;Acc:G4LXU0]	gi|55742705|ref|NP_065755.1|	hypothetical protein LOC57464 isoform a [Homo sapiens]
SmVG_029163:Smp_169400	5.25848	6.81483	6.34783	5.65805	2.67185	4.0411	3.66693	3.66258	-0.777991	5e-05	0.000268034	9.05557	6.95856	8.23339	8.64083	2.17865	4.15989	3.33986	3.7029	-0.513368	7.86594e-09	1.1697e-07	5.24807	4.06088	4.81659	5.2092	1.18411	2.42646	1.76038	2.07716	-0.570568	8.45381e-06	4.22297e-05		protein FAM40A;note=predicted by EVM2;note=pfam_scan%3BPfam:PF07923.8%3B%3BE()%3D1.7E-50%3Bscore%3D171.3%3Bqu ery 20-358%3Bdescription%3DN1221;note=pfam_scan%3BPfam:PF11882.3%3B%3BE()%3D2.9E-6%3Bscore%3D26.4%3Bquer y 428-505%3Bdescription%3DDUF3402;Smp_169400	Putative uncharacterized protein [Source:UniProtKB/TrEMBL;Acc:G4LXT8]	gi|56790935|ref|NP_149079.2|	hypothetical protein LOC85369 [Homo sapiens]
SmVG_023330:Smp_141910	8.24125	10.5425	8.56047	6.95112	4.8317	4.78161	4.1065	6.30224	-0.776423	5e-05	0.000268034	11.5277	8.51924	8.9835	7.99348	2.41354	3.24011	2.74423	3.86484	-0.80093	1.82747e-12	5.40073e-11	6.55458	4.89156	5.01318	4.7124	1.23564	1.78859	1.35964	1.94403	-0.926691	6.59532e-08	5.43923e-07		SH3 and multiple ankyrin repeat domains protein;Smp_141910	Putative sh3 and multiple ankyrin repeat domains protein 1,2 (Shank1,2) [Source:UniProtKB/TrEMBL;Acc:G4VQN4]	gi|226817313|ref|NP_036441.2|	SH3 and multiple ankyrin repeat domains protein 2 isoform 1 [Homo sapiens]
SmVG_023330:Smp_141920	8.24125	10.5425	8.56047	6.95112	4.8317	4.78161	4.1065	6.30224	-0.776423	5e-05	0.000268034	11.5277	8.51924	8.9835	7.99348	2.41354	3.24011	2.74423	3.86484	-0.80093	1.82747e-12	5.40073e-11	6.55458	4.89156	5.01318	4.7124	1.23564	1.78859	1.35964	1.94403	-0.926691	6.59532e-08	5.43923e-07		SH3 and multiple ankyrin repeat domains protein;Smp_141920	Putative uncharacterized protein [Source:UniProtKB/TrEMBL;Acc:G4VQN5]	_	_
Smp_145920	2.14356	2.38174	2.17301	1.83493	1.44832	1.24093	1.04879	1.24517	-0.776016	0.0007	0.00277151	3.75367	2.83933	3.2435	2.86806	0.720071	1.13266	0.938398	0.947333	-0.83385	5.48491e-09	8.39084e-08	2.28645	1.84394	2.02192	1.89313	0.395699	0.632195	0.541416	0.545294	-1.1152	1.51886e-12	3.47393e-11	GO:0006478,GO:0008476,GO:0016020,GO:0016021	protein tyrosine sulfotransferase;Smp_145920	Putative uncharacterized protein [Source:UniProtKB/TrEMBL;Acc:G4VEJ6]	gi|4507665|ref|NP_003587.1|	protein-tyrosine sulfotransferase 1 [Homo sapiens]
Smp_130650	21.1624	25.5939	23.6835	21.9502	11.3191	11.8152	13.2017	17.6185	-0.775996	5e-05	0.000268034	21.6639	17.9815	20.4201	21.3197	4.76209	8.95236	6.82652	9.44135	-0.666507	4.91049e-15	2.29035e-13	12.5956	10.5273	11.6204	12.7807	2.52888	5.07912	3.50085	4.90871	-0.791415	1.27791e-08	1.2613e-07	GO:0004842,GO:0005515,GO:0005622,GO:0005634,GO:0005737,GO:0006464,GO:0016567,GO:0016874,GO:0042787	ubiquitin protein ligase E3C;Smp_130650	Putative ubiquitin-protein ligase [Source:UniProtKB/TrEMBL;Acc:G4VSE0]	gi|35493952|ref|NP_904324.1|	ubiquitin-protein ligase E3B [Homo sapiens]
SmVG_024005:Smp_194800	11.8785	16.277	14.1936	9.00807	7.02626	6.41645	7.20758	9.34687	-0.775743	5e-05	0.000268034	17.019	11.6676	14.4337	10.3333	3.40129	5.33857	4.30302	5.75426	-0.765463	1.81463e-14	7.69441e-13	9.63703	6.64778	8.00136	6.04432	1.70681	2.92429	2.11647	2.85647	-0.849754	1.56584e-06	9.37725e-06		ATP dependent RNA helicase Ddx1;note=manually curated%2C based on EST sequences%3B annotation provided by Ricardo De Marco and Alan Wilson (University of York);note=pfam_scan%3BPfam:PF00622.23%3B%3BE()%3D2.4E-10%3Bscore%3D40.4%3Bqu ery 81-218%3Bdescription%3DSPRY;note=pfam_scan%3BPfam:PF00622.23%3B%3BE()%3D9.5E-16%3Bscore%3D57.8%3Bqu ery 297-422%3Bdescription%3DSPRY;note=iprscan%3BInterPro:IPR003…	SPRY domain containing protein [Source:UniProtKB/TrEMBL;Acc:G4VQJ8]	gi|4826686|ref|NP_004930.1|	ATP-dependent RNA helicase DDX1 [Homo sapiens]
SmVG_024005:Smp_194810	11.8785	16.277	14.1936	9.00807	7.02626	6.41645	7.20758	9.34687	-0.775743	5e-05	0.000268034	17.019	11.6676	14.4337	10.3333	3.40129	5.33857	4.30302	5.75426	-0.765463	1.81463e-14	7.69441e-13	9.63703	6.64778	8.00136	6.04432	1.70681	2.92429	2.11647	2.85647	-0.849754	1.56584e-06	9.37725e-06		band 4;Smp_194810	Band 4.1-like protein [Source:UniProtKB/TrEMBL;Acc:G4VQJ7]	gi|32490572|ref|NP_036439.2|	band 4.1-like protein 3 [Homo sapiens]
Smp_058360	27.8763	26.0909	26.623	19.9171	11.3589	16.51	12.0971	18.7724	-0.774926	5e-05	0.000268034	37.691	37.9524	37.0178	30.0317	7.77122	12.7122	14.9939	15.5995	-0.755526	2.61744e-10	5.32729e-09	21.349	21.5257	20.4884	17.6432	3.97341	6.90299	7.27271	7.89046	-0.817125	2.63435e-06	1.49043e-05	GO:0005216,GO:0005247,GO:0005515,GO:0006810,GO:0006811,GO:0006821,GO:0016020,GO:0016021,GO:0034220,GO:0055085,GO:1903959	H(+):Cl() exchange transporter 7;Smp_058360.2	Putative chloride channel protein [Source:UniProtKB/TrEMBL;Acc:G4VNL0]	gi|153252026|ref|NP_001821.2|	H(+)/Cl(-) exchange transporter 4 [Homo sapiens]
Smp_172000	5.87646	8.29175	6.32282	6.11161	3.36682	5.19114	2.63983	4.37628	-0.772424	0.00325	0.0103569	11.3541	7.85244	8.37663	8.12143	2.00847	3.8539	3.19611	3.81046	-0.680921	0.000107223	0.000598394	8.95367	5.91966	6.00552	6.3352	1.68696	2.61623	2.42923	2.55306	-0.715804	0.000396301	0.00125613		hypothetical protein;note=predicted by EVM2;note=pfam_scan%3BPfam:PF10221.4%3B%3BE()%3D2.1E-19%3Bscore%3D69.0%3Bque ry 5-153%3Bdescription%3DDUF2151;note=pfam_scan%3BPfam:PF10221.4%3B%3BE()%3D2.0E-13%3Bscore%3D49.3%3Bque ry 215-310%3Bdescription%3DDUF2151;note=iprscan%3BInterPro:IPR019355 : Protein of unknown function DUF2151%3BPfam:PF10221%3B%3Bscore%3D3.8E-10%3Bquery 226-267%3Bdescription%3DPro…
Smp_194380	35.5264	31.5401	32.9995	26.6272	7.109	18.2391	15.76	33.1637	-0.770453	5e-05	0.000268034	23.4772	25.4946	24.1545	21.6816	2.41583	8.7804	8.83821	14.6082	-1.00525	0.00122888	0.00493704	13.8561	15.1215	13.9728	13.278	1.32085	5.00791	4.60954	7.8174	-0.827249	0.0133724	0.0271084	GO:0016020,GO:0016263,GO:0016266,GO:0016267,GO:0016740,GO:0016757	glycoprotein N acetylgalactosamine;Smp_194380	Putative core 1 udp-galactose:n-acetylgalactosamine-alpha-r beta 1,3-galactosyltransferase [Source:UniProtKB/TrEMBL;Acc:G4VAU1]	gi|9910144|ref|NP_064541.1|	glycoprotein-N-acetylgalactosamine 3-beta-galactosyltransferase 1 [Homo sapiens]
Smp_153110	4.72638	4.74237	5.03338	4.92261	1.86759	4.22407	2.41652	2.88983	-0.769112	5e-05	0.000268034	5.31154	5.67316	5.62559	6.74979	1.28108	2.53247	3.0841	2.3934	-0.509628	0.00364375	0.012407	3.4253	3.61311	3.49557	4.36661	0.732352	1.60062	1.70219	1.20906	-0.700836	5.68562e-05	0.0002265	GO:0005975,GO:0016757	beta 1%2C4 galactosyltransferase 3;Smp_153110
Smp_212140	2.16714	2.70473	2.07241	2.16239	1.05631	1.4003	1.27765	1.61168	-0.768484	0.00035	0.00152055	3.344	2.64177	2.50683	2.83171	0.487501	1.14029	0.986576	1.36305	-0.796239	2.57494e-07	2.67497e-06	1.99879	1.57106	1.47986	1.72627	0.272196	0.653374	0.58888	0.734437	-0.806069	0.000200649	0.000687563	GO:0005083,GO:0005765,GO:0016192,GO:0030897,GO:0097576	vam6:Vps39 protein like;Smp_212140	Vam6/vps39 related [Source:UniProtKB/TrEMBL;Acc:G4VEF6]	gi|54234024|ref|NP_056104.2|	vam6/Vps39-like protein [Homo sapiens]
Smp_158930	11.4932	13.4951	15.9588	15.1869	7.83198	7.34033	8.01217	9.77046	-0.768378	5e-05	0.000268034	14.6609	11.6195	16.702	17.4292	3.8466	6.11357	4.67963	6.3455	-0.650669	9.01976e-10	1.63656e-08	8.30712	6.68033	9.28666	10.2504	1.96258	3.38422	2.29314	3.145	-0.865214	6.79089e-10	8.7984e-09	GO:0003677,GO:0005515	hypothetical protein;Smp_158930	Putative uncharacterized protein [Source:UniProtKB/TrEMBL;Acc:G4VHW1]	_	_
Smp_131080	7.69929	6.3519	5.62477	6.19522	3.71431	3.19257	3.77579	4.51214	-0.767768	0.00175	0.00609368	10.7904	11.5513	8.20541	10.2862	3.31818	4.2302	3.88578	3.96286	-0.529393	0.000580862	0.0025887	6.42797	6.92181	4.73064	6.27749	1.75769	2.4209	1.99676	2.17189	-0.71258	7.96105e-05	0.00030483		hypothetical protein;note=predicted by EVM2;Smp_131080	Putative uncharacterized protein [Source:UniProtKB/TrEMBL;Acc:G4VHG0]	_	_
Smp_010770.2	16.9892	19.604	19.8423	18.3169	11.6721	8.39724	10.8919	12.9492	-0.767555	5e-05	0.000268034	20.8588	17.7456	20.4217	20.9783	6.38839	8.12128	5.87418	8.40608	-0.628868	6.38385e-08	7.82306e-07	11.6336	9.96893	11.1174	12.1236	3.16682	4.40845	2.83165	4.14779	-0.791459	3.6117e-09	4.02829e-08	GO:0006629,GO:0006631,GO:0006633,GO:0016020,GO:0016021,GO:0016740	elongation of very long chain fatty acids;Smp_010770.2
Smp_125110	7.83733	6.98271	9.19358	8.06251	4.35519	3.9167	4.68754	5.88319	-0.767501	5e-05	0.000268034	6.19415	6.55432	7.72071	7.33819	1.76881	3.10561	2.15919	3.05906	-0.658569	1.74077e-13	6.28772e-12	3.66964	3.89051	4.48962	4.49958	0.913299	1.70955	1.11907	1.58413	-0.85138	4.3359e-10	5.84733e-09	GO:0003677,GO:0003682	SET domain protein;Smp_125110	Putative uncharacterized protein [Source:UniProtKB/TrEMBL;Acc:G4LZE8]	_	_
SmVG_025587:Smp_026540	8.59799	10.3807	8.83284	7.97499	4.52792	5.32072	5.00202	6.17517	-0.767253	5e-05	0.000268034	10.0009	8.31853	8.84075	8.8004	2.13512	3.87225	3.59783	3.89788	-0.636524	1.43001e-14	6.22134e-13	6.18253	5.23096	5.36523	5.59817	1.31945	2.47056	2.10735	2.1464	-0.678182	2.40297e-08	2.1856e-07		clathrin coat associated protein ap 50;Smp_026540	Putative clathrin coat associated protein ap-50 [Source:UniProtKB/TrEMBL;Acc:G4VT47]	gi|150417996|ref|NP_060697.4|	ubiquitin-like modifier-activating enzyme 6 [Homo sapiens]
SmVG_025587:Smp_136500	8.59799	10.3807	8.83284	7.97499	4.52792	5.32072	5.00202	6.17517	-0.767253	5e-05	0.000268034	10.0009	8.31853	8.84075	8.8004	2.13512	3.87225	3.59783	3.89788	-0.636524	1.43001e-14	6.22134e-13	6.18253	5.23096	5.36523	5.59817	1.31945	2.47056	2.10735	2.1464	-0.678182	2.40297e-08	2.1856e-07		ubiquitin modifier activating enzyme;Smp_136500	Putative uncharacterized protein [Source:UniProtKB/TrEMBL;Acc:G4VT46]	_	_
SmVG_025587:Smp_187700	8.59799	10.3807	8.83284	7.97499	4.52792	5.32072	5.00202	6.17517	-0.767253	5e-05	0.000268034	10.0009	8.31853	8.84075	8.8004	2.13512	3.87225	3.59783	3.89788	-0.636524	1.43001e-14	6.22134e-13	6.18253	5.23096	5.36523	5.59817	1.31945	2.47056	2.10735	2.1464	-0.678182	2.40297e-08	2.1856e-07		clathrin coat associated protein ap 50;Smp_187700
Smp_001950	18.7579	20.971	19.9146	18.121	9.83003	8.45757	10.5789	16.8669	-0.765863	0.0178	0.0424465	26.3502	24.1074	25.7152	28.2305	6.20961	11.0186	6.89876	12.3618	-0.739287	5.17532e-14	2.06448e-12	15.8279	14.5217	15.0143	17.0968	3.27345	6.19285	3.54728	6.54134	-0.868853	8.66524e-08	6.9917e-07	GO:0016020,GO:0016021	hypothetical protein;Smp_001950	Putative uncharacterized protein [Source:UniProtKB/TrEMBL;Acc:G4VLH0]	_	_
SmVG_019003:Smp_173220	15.9116	19.2752	17.2972	16.5297	10.1445	8.13093	9.46299	12.8582	-0.765522	0.00095	0.00361893	16.7311	12.3897	14.3091	15.0633	3.89369	5.4021	4.18875	5.85699	-0.734095	2.54754e-13	8.84684e-12	10.2066	7.94186	8.67824	9.64716	2.1243	3.48113	2.25845	3.3373	-0.906518	1.33032e-11	2.46441e-10		hypothetical protein;Smp_173220	Putative uncharacterized protein [Source:UniProtKB/TrEMBL;Acc:G4VJZ7]	_	_
SmVG_019003:Smp_173230	15.9116	19.2752	17.2972	16.5297	10.1445	8.13093	9.46299	12.8582	-0.765522	0.00095	0.00361893	16.7311	12.3897	14.3091	15.0633	3.89369	5.4021	4.18875	5.85699	-0.734095	2.54754e-13	8.84684e-12	10.2066	7.94186	8.67824	9.64716	2.1243	3.48113	2.25845	3.3373	-0.906518	1.33032e-11	2.46441e-10		hypothetical protein;Smp_173230	Putative uncharacterized protein [Source:UniProtKB/TrEMBL;Acc:G4VJZ8]	_	_
Smp_065290	10.3967	13.7292	10.6885	7.69651	7.25487	4.85156	4.20426	8.6997	-0.765307	5e-05	0.000268034	12.9146	9.40409	9.79845	7.98142	3.358	2.84247	2.45951	4.96075	-0.867043	0.000102572	0.00057656	7.74143	5.62844	5.78766	4.91629	1.82351	1.6161	1.30137	2.61721	-0.861285	0.000883169	0.00253343	GO:0000166,GO:0004672,GO:0004674,GO:0004683,GO:0005524,GO:0006468,GO:0016301,GO:0016310,GO:0016740,GO:0016772	calcium:calmodulin dependent protein kinase I;Smp_065290	Putative calcium/calmodulin-dependent protein kinase [Source:UniProtKB/TrEMBL;Acc:G4VCT2]	gi|83776596|ref|NP_076951.2|	caM kinase-like vesicle-associated protein [Homo sapiens]
SmVG_035999	20.5343	18.8483	21.1222	18.4405	7.47193	12.1032	12.6219	14.2755	-0.764473	0.00125	0.00457654	13.6827	15.4661	13.6122	14.1024	2.91201	6.73806	5.00479	5.80575	-0.65024	0.000847723	0.00358673	11.2513	11.5258	10.965	11.6236	2.02018	5.74559	3.46489	5.0701	-0.674673	0.00132734	0.00359134	GO:0004672,GO:0006468
Smp_029070	20.2874	22.502	21.9262	22.0594	11.1602	9.00686	13.9069	17.0189	-0.764155	5e-05	0.000268034	22.0875	19.4727	21.6333	23.9177	5.60468	10.3091	6.54083	10.7545	-0.630713	3.76382e-13	1.26212e-11	12.6243	11.2177	12.1293	14.1916	2.87909	5.71911	3.2535	5.43696	-0.73643	7.3404e-07	4.72663e-06		hypothetical protein;Smp_029070	Putative uncharacterized protein [Source:UniProtKB/TrEMBL;Acc:G4VGT5]	_	_
Smp_015100	10.2005	11.8568	12.2044	11.0962	4.8251	7.20719	5.39064	9.28678	-0.763986	0.00045	0.00189572	9.61015	8.13866	9.88388	9.76174	1.85185	3.152	3.68152	4.59064	-0.744188	5.75152e-06	4.46057e-05	5.41885	4.67609	5.48026	5.73331	0.929743	1.74743	1.82655	2.27237	-0.817468	0.000151585	0.000538443	GO:0016020,GO:0016021	hypothetical protein;Smp_015100	Putative uncharacterized protein [Source:UniProtKB/TrEMBL;Acc:G4VGB5]	_	_
Smp_155420	10.3581	11.4254	12.3182	12.0047	5.44942	6.67967	7.45443	7.57435	-0.763597	5e-05	0.000268034	10.907	9.36626	11.3808	12.5145	2.14821	4.75281	3.96331	4.26745	-0.678226	5.10304e-08	6.38044e-07	6.23671	5.40985	6.40504	7.44309	1.11377	2.65164	1.98255	2.19079	-0.887827	6.5938e-08	5.43923e-07	GO:0003756,GO:0005783,GO:0006457,GO:0034976	thioredoxin domain containing protein 11;Smp_155420	Putative uncharacterized protein [Source:UniProtKB/TrEMBL;Acc:G4VNI4]	gi|54633317|ref|NP_056998.4|	thioredoxin domain-containing protein 11 [Homo sapiens]
Smp_176440	27.6151	34.8809	32.1481	29.4702	17.372	18.2964	16.1783	21.2733	-0.763331	5e-05	0.000268034	31.0928	23.4301	27.7166	28.3858	7.06473	10.4455	10.2428	11.5965	-0.65512	3.06676e-13	1.04943e-11	17.5466	13.2393	15.3977	16.43	3.53604	5.75219	4.99531	5.81182	-0.822062	1.06959e-10	1.62946e-09	GO:0004672,GO:0005488,GO:0005524,GO:0006468,GO:0016301,GO:0016310,GO:0016772	protein kinase;Smp_176440	Protein kinase [Source:UniProtKB/TrEMBL;Acc:G4V678]	gi|115430241|ref|NP_065731.3|	N-terminal kinase-like protein isoform A [Homo sapiens]
Smp_094380	7.35288	8.95485	9.13177	10.002	4.92527	4.34384	4.75696	6.86076	-0.762846	5e-05	0.000268034	9.90444	7.17864	9.22638	10.58	2.04177	3.46787	2.60209	3.86575	-0.748506	1.0679e-07	1.23251e-06	5.96966	4.51324	5.5295	6.75855	1.14393	2.11233	1.41447	2.09834	-0.965902	2.44855e-08	2.22235e-07	GO:0000122,GO:0000977,GO:0003682,GO:0003712,GO:0005515,GO:0008270,GO:0042393,GO:0046872,GO:0070822	phd finger protein 12;Smp_094380	Putative fyve-containing [Source:UniProtKB/TrEMBL;Acc:G4VDR0]	_	_
Smp_140590	6.98274	15.4429	11.2915	6.26518	6.11244	4.84415	4.46074	8.15711	-0.762141	5e-05	0.000268034	16.9238	8.06413	12.1828	7.49768	2.8434	3.86549	3.16653	5.82998	-0.851975	5.54405e-05	0.000333241	9.95853	4.81277	7.0456	4.67978	1.6677	2.30326	1.74462	3.18689	-0.785278	0.00403399	0.00958436	GO:0030246	hypothetical protein;Smp_140590	Putative uncharacterized protein [Source:UniProtKB/TrEMBL;Acc:G4V9U8]	_	_
Smp_164880	19.7315	21.6185	22.1906	18.8549	11.6836	11.251	11.9404	13.7131	-0.761963	5e-05	0.000268034	40.8776	33.8896	39.3474	37.2736	9.94791	15.8053	12.9813	14.9987	-0.660473	9.04705e-16	4.74788e-14	23.5491	19.7603	22.2069	22.1715	5.15559	8.78917	6.54296	7.67265	-0.839447	2.39853e-14	7.45368e-13	GO:0005515,GO:0005856	ATP dependent RNA helicase Ddx1;Smp_164880	Putative 4.1 G protein [Source:UniProtKB/TrEMBL;Acc:G4VP50]	gi|30061489|ref|NP_036288.2|	band 4.1-like protein 1 isoform a [Homo sapiens]
SmVG_029796:Smp_133360	8.07212	11.1093	6.82868	7.25449	3.91448	3.95889	5.21573	6.53344	-0.761476	0.0128	0.0322264	11.9154	8.34801	7.88467	8.43172	2.1324	4.0895	2.43759	4.12047	-0.762594	6.90391e-07	6.59025e-06	6.85331	4.86846	4.33289	4.98239	1.11151	2.36859	1.25039	2.12705	-0.859273	3.16194e-05	0.000134992		hypothetical protein;Smp_133360	Putative uncharacterized protein [Source:UniProtKB/TrEMBL;Acc:G4LY92]	_	_
SmVG_029796:Smp_133370	8.07212	11.1093	6.82868	7.25449	3.91448	3.95889	5.21573	6.53344	-0.761476	0.0128	0.0322264	11.9154	8.34801	7.88467	8.43172	2.1324	4.0895	2.43759	4.12047	-0.762594	6.90391e-07	6.59025e-06	6.85331	4.86846	4.33289	4.98239	1.11151	2.36859	1.25039	2.12705	-0.859273	3.16194e-05	0.000134992		tetratricopeptide repeat protein 39B;note=predicted by EVM2;note=pfam_scan%3BPfam:PF10300.4%3B%3BE()%3D4.6E-45%3Bscore%3D153.9%3Bqu ery 4-192%3Bdescription%3DDUF3808;note=pfam_scan%3BPfam:PF10300.4%3B%3BE()%3D1.6E-36%3Bscore%3D125.7%3Bqu ery 196-392%3Bdescription%3DDUF3808;note=iprscan%3BInterPro:IPR019412 : Outer membrane protein%2C IML2%2C mitochondrial/Tetratricopeptide repeat protein 39%3BPfa…	Putative uncharacterized protein [Source:UniProtKB/TrEMBL;Acc:G4LY93]	gi|221307588|ref|NP_001138304.1|	tetratricopeptide repeat protein 39A isoform 1 [Homo sapiens]
Smp_097590	10.9013	14.31	15.082	13.4635	7.12941	7.41389	8.02281	9.15401	-0.76105	0.0004	0.00171395	14.8956	11.1595	15.7792	15.1331	3.5509	6.11184	5.23347	5.9429	-0.609588	6.50165e-09	9.8306e-08	8.36423	6.32598	8.68007	8.76785	1.76777	3.34434	2.53597	2.97588	-0.782272	8.81142e-09	9.10549e-08	GO:0000166,GO:0002161,GO:0004812,GO:0004832,GO:0005524,GO:0005737,GO:0005829,GO:0006412,GO:0006418,GO:0006438,GO:0006450,GO:0016874	valyl tRNA synthetase;Smp_097590	Valine-tRNA ligase [Source:UniProtKB/TrEMBL;Acc:G4M0N7]	gi|46852147|ref|NP_060530.3|	isoleucyl-tRNA synthetase, mitochondrial precursor [Homo sapiens]
Smp_199120	12.4327	14.968	13.2968	11.6173	6.70922	7.94683	6.97315	9.24896	-0.760629	5e-05	0.000268034	18.505	14.5895	15.9214	15.3672	3.73055	6.29122	5.92362	6.71924	-0.709865	1.44361e-17	9.49132e-16	10.9651	8.72857	9.27814	9.47881	1.97937	3.68902	3.21413	3.55234	-0.824014	1.48923e-09	1.81195e-08		protein FAM114A2;Smp_199120	Putative uncharacterized protein [Source:UniProtKB/TrEMBL;Acc:G4M152]	_	_
Smp_157770	15.2209	16.6943	17.7288	15.6753	8.51405	8.39038	9.59268	12.0931	-0.759276	5e-05	0.000268034	15.4067	12.9433	15.8319	15.0983	3.39125	6.35039	4.7234	6.8557	-0.70984	5.34918e-16	2.85852e-14	9.02388	7.67069	9.11344	9.22298	1.87846	3.63627	2.44427	3.61793	-0.800631	1.33845e-08	1.31198e-07	GO:0004842,GO:0005488,GO:0016567,GO:0031462,GO:0051438	protein zyg 11 protein B;Smp_157770	Putative uncharacterized protein [Source:UniProtKB/TrEMBL;Acc:G4VP37]	gi|226437632|ref|NP_001004339.2|	protein zyg-11 homolog A [Homo sapiens]
Smp_148370	16.9939	18.4507	17.0718	17.5237	9.23902	10.6104	10.8833	10.6698	-0.758461	0.0006	0.00243167	21.9506	19.1616	19.5462	21.935	4.83246	9.44342	7.51934	7.95015	-0.622648	2.76301e-13	9.5667e-12	12.3215	10.8793	10.7765	12.7839	2.4375	5.15335	3.68126	3.94532	-0.822651	1.06409e-12	2.48684e-11		thyroid receptor interacting protein 11;Smp_148370	Putative uveal autoantigen with coiled-coil domains and ankyrin repeats protein (Beta-actin-binding protein) (BetaCAP73) [Source:UniProtKB/TrEMBL;Acc:G4VBZ9]	gi|190194412|ref|NP_004230.2|	thyroid receptor-interacting protein 11 [Homo sapiens]
SmVG_035941	26.1479	25.123	30.7492	28.9836	16.8475	15.723	14.3294	18.7339	-0.758099	5e-05	0.000268034	16.7157	17.504	20.8188	21.7914	5.27987	7.32312	6.67896	7.83734	-0.608374	1.4177e-07	1.57115e-06	10.1583	10.91	12.471	13.6295	2.81531	4.19516	3.54468	4.21332	-0.859744	2.7059e-09	3.10274e-08
Smp_029990	7.11251	7.6192	8.16261	7.30104	3.38908	4.29592	4.09582	6.10039	-0.755882	5e-05	0.000268034	7.78757	6.95471	8.36748	8.11978	1.61959	3.06345	2.85798	3.95492	-0.720724	5.18635e-14	2.06448e-12	4.56164	4.05684	4.7399	4.88031	0.847713	1.73061	1.46786	2.03941	-0.804932	3.89455e-06	2.09953e-05	GO:0005085,GO:0005622,GO:0007264,GO:0016020,GO:0016021,GO:0043547	dedicator of cytokinesis protein;Smp_029990	Putative dedicator of cytokinesis protein 1 (DOCK1) [Source:UniProtKB/TrEMBL;Acc:G4VFK0]	gi|31377468|ref|NP_004937.1|	dedicator of cytokinesis protein 2 [Homo sapiens]
Smp_149610	20.6743	26.8893	29.5598	42.2017	14.8735	11.9542	20.6421	23.2278	-0.755165	5e-05	0.000268034	31.623	22.9924	32.5376	50.5258	8.33592	18.0044	9.19626	16.4694	-0.508567	0.00416609	0.0138787	20.9768	15.318	21.4794	36.6842	5.38996	12.1894	5.53405	10.6243	-0.696201	0.00404631	0.00961095	GO:0005488,GO:0030246	hypothetical protein;Smp_149610	Putative uncharacterized protein [Source:UniProtKB/TrEMBL;Acc:G4LY01]	_	_
Smp_205910	3.54406	4.62153	4.8129	4.11661	2.48968	2.50772	2.45983	2.68956	-0.752561	0.0023	0.00772313	3.30762	2.61473	3.66576	3.50394	1.01511	1.43744	1.35216	1.30609	-0.480289	0.0160467	0.0427681	2.43438	1.90039	2.57427	2.46637	0.583336	1.06488	1.0455	0.95832	-0.571177	0.00437521	0.0102615	GO:0016020,GO:0016021	hypothetical protein;note=tmhmm%3B%3Bquery 1-557%3B;note=%3Bquery 511-514%3B;note=%3Bquery 493-510%3B;note=%3Bquery 515-537%3B;note=%3Bquery 1-492%3B;note=%3Bquery 538-557%3B;Smp_205910	WGS project CABG00000000 data, supercontig 0881, strain Puerto Rico [Source:UniProtKB/TrEMBL;Acc:G4M264]	_	_
Smp_141390	24.2189	33.7376	27.6545	21.0326	18.5433	12.0534	13.5242	19.2083	-0.751856	5e-05	0.000268034	35.9717	24.5886	29.002	23.4062	8.76465	9.9933	7.77989	12.1151	-0.7634	1.64964e-06	1.45528e-05	20.2217	14.3017	16.106	13.6909	4.6728	6.23285	4.17124	6.31877	-0.776941	1.28435e-05	6.11992e-05	GO:0005921,GO:0006810,GO:0006811,GO:0016020,GO:0016021,GO:0030054	innexin unc 9;Smp_141390	Putative innexin [Source:UniProtKB/TrEMBL;Acc:G4V7R0]	_	_
Smp_180300	5.96551	5.71763	6.12865	5.95448	3.16701	3.65941	3.60407	3.688	-0.751331	5e-05	0.000268034	6.06507	5.96426	6.33057	7.04846	1.48473	2.93343	2.48587	2.45607	-0.580977	5.01274e-07	4.91735e-06	3.37195	3.3491	3.42556	4.06015	0.745909	1.58424	1.21006	1.20672	-0.776942	1.22797e-08	1.22184e-07	GO:0005622,GO:0008270,GO:0046872	hypothetical protein;Smp_180300	Putative uncharacterized protein [Source:UniProtKB/TrEMBL;Acc:G4VAC6]	_	_
SmVG_012602:Smp_138440	10.578	11.739	11.1011	9.71395	5.01546	5.2135	7.40485	8.00724	-0.750305	5e-05	0.000268034	11.2791	10.0998	10.6672	10.5457	2.09987	4.89557	3.28496	4.63672	-0.76022	1.16938e-11	3.04795e-10	6.51762	5.9108	6.05308	6.36632	1.14171	2.84254	1.67076	2.40269	-0.854053	3.78083e-08	3.30526e-07		ubiquitin ligase E3;Smp_138440	Putative ubiquitin ligase E3 [Source:UniProtKB/TrEMBL;Acc:G4VFL6]	_	_
SmVG_012602:Smp_138450	10.578	11.739	11.1011	9.71395	5.01546	5.2135	7.40485	8.00724	-0.750305	5e-05	0.000268034	11.2791	10.0998	10.6672	10.5457	2.09987	4.89557	3.28496	4.63672	-0.76022	1.16938e-11	3.04795e-10	6.51762	5.9108	6.05308	6.36632	1.14171	2.84254	1.67076	2.40269	-0.854053	3.78083e-08	3.30526e-07		E3 ubiquitin protein ligase UBR3;Smp_138450	Ubiquitin ligase E3 alpha-related [Source:UniProtKB/TrEMBL;Acc:G4VFL7]	gi|160948610|ref|NP_742067.3|	E3 ubiquitin-protein ligase UBR3 [Homo sapiens]
Smp_145420	7.71875	8.334	9.15168	7.53299	3.71392	4.96924	4.812	5.98687	-0.748796	5e-05	0.000268034	7.56729	6.84002	8.31371	7.63351	1.44496	3.13913	2.72518	3.36766	-0.749382	8.93665e-10	1.62906e-08	4.33917	3.95503	4.66909	4.5126	0.750133	1.75236	1.37094	1.71941	-0.875161	9.24176e-08	7.39427e-07	GO:0002116,GO:0004872,GO:0005515,GO:0005622,GO:0005887,GO:0007165,GO:0007275,GO:0008045,GO:0016020,GO:0016021,GO:0017154,GO:0030334,GO:0048841,GO:0071526,GO:1902287	plexin A3;Smp_145420	Putative plexin [Source:UniProtKB/TrEMBL;Acc:G4VIV2]	gi|262118282|ref|NP_115618.3|	plexin-A1 precursor [Homo sapiens]
Smp_137940	6.66978	6.44089	7.19371	7.07992	4.75609	2.67453	4.08024	4.79044	-0.748361	0.0052	0.0152498	10.3049	9.4022	9.55309	11.1401	3.61255	3.78034	2.90508	4.94994	-0.589472	0.00129952	0.00517641	7.84185	6.88207	7.43764	8.88818	2.83278	3.1982	2.34538	3.6514	-0.501686	0.00933632	0.0197723	GO:0004385,GO:0005515,GO:0016301,GO:0016310,GO:0016740,GO:0046037,GO:0046710	guanylate kinase;Smp_137940	Putative guanylate kinase [Source:UniProtKB/TrEMBL;Acc:G4VGU4]	gi|4557529|ref|NP_001356.1|	disks large homolog 4 isoform 1 [Homo sapiens]
Smp_133250	12.5804	13.3836	14.7321	9.91191	7.44199	7.76758	6.47481	8.44258	-0.748312	5e-05	0.000268034	10.0228	9.16485	10.9711	8.13665	2.55236	2.93881	3.13325	3.85069	-0.815827	4.9631e-13	1.64077e-11	5.67213	5.12885	6.0427	4.74406	1.28523	1.9334	1.75279	1.90119	-0.846203	2.19629e-08	2.02992e-07	GO:0004714,GO:0007155,GO:0016020,GO:0016021,GO:0016740,GO:0018108,GO:0070492	discoidin domain containing receptor 2;Smp_133250	Putative discoidin domain receptor [Source:UniProtKB/TrEMBL;Acc:G4V8B7]	gi|83977452|ref|NP_054700.2|	epithelial discoidin domain-containing receptor 1 isoform 3 precursor [Homo sapiens]
Smp_169410	1.935	3.07646	3.32622	3.44527	1.38684	1.64381	2.017	1.9684	-0.747969	0.0016	0.00564547	3.01212	1.82341	3.15374	3.5845	0.549057	1.36073	1.061	1.10991	-0.586662	0.00641662	0.0199188	1.77323	1.07485	1.84767	2.33222	0.317674	0.821284	0.56813	0.639615	-0.818033	0.000933593	0.00265335		hypothetical protein;Smp_169410	Putative uncharacterized protein [Source:UniProtKB/TrEMBL;Acc:G4LXU1]	_	_
Smp_142890	10.1	10.9394	10.461	9.63071	4.82453	7.45376	6.56096	5.67296	-0.746727	5e-05	0.000268034	10.9234	9.9779	10.4919	11.1525	2.16724	4.99503	4.77033	3.5532	-0.594855	7.50281e-05	0.000436192	6.31046	5.80272	5.91076	6.6695	1.13948	2.93673	2.5012	1.88985	-0.781966	3.63033e-06	1.97447e-05	GO:0004842,GO:0005622,GO:0005634,GO:0005737,GO:0006464,GO:0016567,GO:0016874,GO:0042787	E3 ubiquitin protein ligase HERC4;Smp_142890	Putative hect E3 ubiquitin ligase [Source:UniProtKB/TrEMBL;Acc:G4VNS7]	gi|7657152|ref|NP_055421.1|	probable E3 ubiquitin-protein ligase HERC3 [Homo sapiens]
[truncated: 1,083 more rows]
