# Supplementary material for: Pharmacological inhibition of lysine-specific demethylase 1 (LSD1) induces global transcriptional deregulation and ultrastructural alterations that impair viability in Schistosoma mansoni
Source: PLoS Negl Trop Dis. 2020 Jul 1;14(7):e0008332. doi: 10.1371/journal.pntd.0008332 (PMC7329083; doi:10.1371/journal.pntd.0008332)
Supplement: S5 Table — (XLSX) [file pntd.0008332.s013.xlsx]

## Sheet: Male_Down
List of downregulated genes_Male
geneID	fpkm-control_1-cuffquant	fpkm-control_0-cuffquant	fpkm-control_2-cuffquant	fpkm-control_3-cuffquant	fpkm-treated_0-cuffquant	fpkm-treated_2-cuffquant	fpkm-treated_1-cuffquant	fpkm-treated_3-cuffquant	log2(fold_change)-cuffdiff	p-value-cuffdiff	q-value-cuffdiff	tpm-control1-kallisto	tpm-control2-kallisto	tpm-control3-kallisto	tpm-control4-kallisto	tpm-treated1-kallisto	tpm-treated2-kallisto	tpm-treated3-kallisto	tpm-treated4-kallisto	b-sleuth	p-value-sleuth	q-value-sleuth	TPM-control1-sailfish	TPM-control2-sailfish	TPM-control3-sailfish	TPM-control4-sailfish	TPM-treated1-sailfish	TPM-treated2-sailfish	TPM-treated3-sailfish	TPM-treated4-sailfish	log2FC-edgeR	p-value-edgeR	q-value-edgeR	GO_terms	product_description	swissProtAnnotationOfSMansoniGene	humanHomologous-hit	humanHomologous-hitDescription
Smp_164550	243.788	254.665	207.592	217.903	7.18909	0	3.98617	6.1027	-5.74081	0.00155	0.00422796	1278.66	1426.01	1369.88	1156.6	45.8388	58.9822	21.0723	19.2762	-3.38669	3.77972e-33	1.87028e-31	1477.39	1556.85	1427.4	1219.67	33.1214	55.7989	20.9766	22.1232	-4.82758	2.54702e-125	1.77127e-122		hypothetical protein;Smp_164550	Putative uncharacterized protein [Source:UniProtKB/TrEMBL;Acc:G4LUS1]	_	_
SmVG_016723	16.7382	19.9528	13.732	13.0357	0.237813	0.245854	0.441018	0.372575	-5.61228	5e-05	0.000181778	26.2341	23.4363	21.5691	18.1572	0.447046	0.728964	0.855878	0.921031	-3.12784	2.54035e-47	2.31849e-45	16.8416	14.3655	13.2569	10.8631	0.271015	0.444388	0.482111	0.619967	-4.39191	6.35465e-75	1.14572e-72
SmVG_007496	1.16698	2.28845	1.21335	1.40818	0	0.159812	0.0411359	0	-4.91846	0.02495	0.048841	3.30204	2.34517	1.98705	2.22707	0.0475586	0.139857	0.227464	0.106956	-2.64353	1.39823e-10	1.28277e-09	2.14706	1.33474	1.25117	1.40162	0.0497913	0.153023	0.156139	0.196098	-2.94033	4.94598e-17	5.79472e-16
SmVG_011620:Smp_017610	40.1006	34.0634	33.738	38.408	1.01128	1.64657	1.33706	0.897589	-4.90231	5e-05	0.000181778	44.8631	56.4461	52.4768	52.3766	0.859624	1.67669	1.76442	1.19378	-3.39375	1.72581e-99	8.50548e-97	28.6355	34.5057	31.7086	31.4369	0.441771	0.979213	0.995932	0.687454	-4.83303	2.15841e-181	5.25357e-178		amiloride sensitive amine oxidase;Smp_017610	Amine oxidase [Source:UniProtKB/TrEMBL;Acc:G4VGX7]	gi|73486661|ref|NP_001082.2|	amiloride-sensitive amine oxidase [copper-containing] precursor [Homo sapiens]
SmVG_011620:Smp_017620	40.1006	34.0634	33.738	38.408	1.01128	1.64657	1.33706	0.897589	-4.90231	5e-05	0.000181778	44.8631	56.4461	52.4768	52.3766	0.859624	1.67669	1.76442	1.19378	-3.39375	1.72581e-99	8.50548e-97	28.6355	34.5057	31.7086	31.4369	0.441771	0.979213	0.995932	0.687454	-4.83303	2.15841e-181	5.25357e-178		membrane primary amine oxidase;Smp_017620	Putative uncharacterized protein [Source:UniProtKB/TrEMBL;Acc:G4VGX8]	gi|4502119|ref|NP_003725.1|	membrane primary amine oxidase precursor [Homo sapiens]
Smp_180350	2.47928	2.83553	3.2528	2.38982	0.204825	0.109934	0.0564631	0	-4.88348	0.01785	0.0366403	3.92371	3.59509	4.67777	3.85216	0.195183	0.093966	0.0694546	0	-3.52615	2.37243e-13	2.91723e-12	2.38637	2.09553	2.68935	2.18428	0.0949937	0.0525416	0.0365425	0	-4.97372	1.29119e-38	5.37222e-37	GO:0004871,GO:0004930,GO:0005887,GO:0007165,GO:0007186,GO:0007602,GO:0008020,GO:0009584,GO:0016020,GO:0016021,GO:0071482	opsin receptor;Smp_180350	Rhodopsin [Source:UniProtKB/TrEMBL;Acc:G4VRA9]	gi|4506527|ref|NP_000530.1|	rhodopsin [Homo sapiens]
SmVG_011619	1.84358	1.60064	1.95192	1.96968	0.0408753	0.0889087	0.0449638	0.0984185	-4.753	0.00025	0.000810166	2.07079	2.60862	3.04815	2.25536	0.0245206	0.0529367	0.0805985	0.0756426	-3.41009	2.53651e-19	5.35142e-18	1.35171	1.5963	1.82639	1.36623	0.0255987	0.0312348	0.0304213	0.057235	-4.87351	5.74537e-54	4.43944e-52
Smp_149930	5.00809	4.3908	4.78887	5.74317	0.277796	0.201635	0.204091	0.0755333	-4.71466	5e-05	0.000181778	4.77628	5.80548	5.81296	6.6305	0.319432	0.366024	0.160296	0.0873046	-3.04372	1.4846e-18	2.92669e-17	3.03577	3.41685	3.43131	3.82022	0.158714	0.21863	0.10425	0.0557219	-4.08435	4.7338e-61	4.80087e-59	GO:0005622,GO:0008270,GO:0016020,GO:0016021,GO:0046872,GO:0055085	sodium:potassium:calcium exchanger 6;Smp_149930	Putative na/ca exchanger [Source:UniProtKB/TrEMBL;Acc:G4VI37]	gi|39995086|ref|NP_079235.2|	sodium/potassium/calcium exchanger 6 precursor [Homo sapiens]
Smp_000755	42.6959	39.9822	40.4533	52.2296	1.4403	2.79039	1.53262	1.16325	-4.66204	5e-05	0.000181778	52.5939	62.5988	59.0966	69.1809	1.35189	1.85613	2.1644	1.39286	-3.32715	1.11102e-108	8.05226e-106	31.8055	36.323	33.9296	39.2702	0.667313	1.03699	1.15193	0.73434	-4.74825	5.17709e-161	8.40069e-158	GO:0004222,GO:0006508,GO:0008237,GO:0016020,GO:0016021,GO:0016787	family M13 non peptidase ue (M13 family);Smp_000755	Family M13 non-peptidase homologue (M13 family) [Source:UniProtKB/TrEMBL;Acc:G4V669]	_	_
Smp_135230	27.6084	31.5144	30.9744	36.5638	1.1858	0.813336	1.23524	1.92543	-4.61751	5e-05	0.000181778	35.8383	33.6886	39.0853	41.0517	0.861861	1.23811	0.572976	1.90145	-3.3013	1.5026e-56	1.87006e-54	22.5012	20.153	23.0811	24.0357	0.48894	0.742729	0.338868	0.976995	-4.61554	2.8101e-137	3.0399e-134	GO:0003824,GO:0004058,GO:0006520,GO:0016829,GO:0016831,GO:0019752,GO:0030170	Tyrosine DeCarboxylase family member (tdc 1);Smp_135230	Aromatic-L-amino-acid decarboxylase [Source:UniProtKB/TrEMBL;Acc:G4VQ65]	gi|92110055|ref|NP_002103.2|	histidine decarboxylase [Homo sapiens]
Smp_136730	469.069	591.86	430.941	578.398	8.95109	56.6078	12.9977	23.0353	-4.34896	5e-05	0.000181778	641.522	537.78	508.256	615.304	7.79212	13.3604	45.8056	25.9256	-3.14548	1.83549e-15	2.75123e-14	400.435	321.658	299.691	358.208	4.23514	7.79317	25.3579	14.3603	-4.14128	8.74119e-19	1.17385e-17	GO:0004190,GO:0005615,GO:0005764,GO:0006508,GO:0008233,GO:0016787,GO:0030163	cathepsin d (lysosomal aspartyl protease);Smp_136730	Subfamily A1A unassigned peptidase (A01 family) [Source:UniProtKB/TrEMBL;Acc:G4VFY7]	gi|4503143|ref|NP_001900.1|	cathepsin D preproprotein [Homo sapiens]
Smp_160360	102.37	103.495	81.5694	100.98	4.30397	3.36543	6.28894	5.68429	-4.30553	5e-05	0.000181778	120.032	127.83	105.781	116.595	3.53717	6.44229	2.95936	5.42025	-3.02087	3.11648e-113	3.49074e-110	73.4566	75.9949	62.555	68.0131	1.90167	3.75744	1.71476	3.04552	-4.22003	3.17806e-180	6.18831e-177	GO:0005215,GO:0005328,GO:0005887,GO:0006810,GO:0006836,GO:0015293,GO:0016020,GO:0016021,GO:0055085	sodium:chloride dependent neurotransmitter;Smp_160360	Transporter [Source:UniProtKB/TrEMBL;Acc:G4LYW2]	gi|218563756|ref|NP_001136277.1|	sodium- and chloride-dependent creatine transporter 1 isoform 2 [Homo sapiens]
Smp_164320	15.6404	21.1032	16.5145	19.7308	0.600866	1.67227	0.666572	0.78381	-4.29294	5e-05	0.000181778	29.9147	22.3371	26.3366	28.8759	0.473034	1.02505	1.50977	1.45617	-2.96603	3.27805e-32	1.56546e-30	18.7044	13.5069	15.8404	17.1621	0.237885	0.588345	0.824902	0.808213	-4.20331	9.74506e-64	1.14311e-61		hypothetical protein;note=predicted by EVM2;Smp_164320	Putative uncharacterized protein [Source:UniProtKB/TrEMBL;Acc:G4M0E7]	_	_
Smp_165340	6.22714	4.12675	3.51639	4.15072	0.15151	0	0.418114	0.369768	-4.26181	0.00025	0.000810166	7.50116	12.6827	6.15803	7.67633	0.212582	0.691348	0.22464	0.652818	-2.68274	1.46211e-14	1.99941e-13	4.76435	7.57964	3.78125	4.5492	0.111597	0.404321	0.12945	0.37362	-3.78356	3.46849e-25	7.20025e-24		alpha tocopherol transfer protein;Smp_165340	Retinaldehyde binding protein-related [Source:UniProtKB/TrEMBL;Acc:G4VJL8]	gi|85861243|ref|NP_001034288.1|	alpha-tocopherol transfer protein-like [Homo sapiens]
SmVG_012263	6.41168	4.84789	11.1246	7.84697	0.351645	0.529724	0.430304	0.318242	-4.21317	5e-05	0.000181778	5.76454	7.86808	13.8944	8.82875	0.263135	0.442952	0.612872	0.36229	-2.78662	2.64507e-31	1.19816e-29	3.62904	4.86795	8.26946	5.24099	0.141718	0.268562	0.367495	0.219769	-3.92228	6.08655e-36	2.27918e-34
SmVG_025534	6.72491	4.7943	9.13291	8.18974	0.156466	0.485452	0.69101	0.377764	-4.07551	5e-05	0.000181778	5.25871	7.83385	10.848	8.95268	0.106769	0.617302	0.451248	0.655727	-2.66152	2.75244e-14	3.66625e-13	3.46832	4.90593	6.91284	5.53157	0.113373	0.323793	0.193128	0.37216	-3.79036	2.85229e-26	6.34016e-25
Smp_128860	17.0329	18.0444	21.7302	25.7589	1.94998	0.83586	0.994526	1.28035	-4.02814	5e-05	0.000181778	19.4551	19.2655	25.2126	27.445	1.41437	1.09971	0.640488	1.17476	-2.79027	4.60934e-47	4.17586e-45	12.018	11.3532	14.7953	15.9309	0.711044	0.624415	0.349787	0.645588	-3.98961	1.66748e-62	1.86605e-60	GO:0005044,GO:0005507,GO:0006898,GO:0016020,GO:0016641,GO:0055114	lysyl oxidase 2;Smp_128860	Lysyl oxidase-like [Source:UniProtKB/TrEMBL;Acc:G4V971]	gi|14211943|ref|NP_115992.1|	lysyl oxidase homolog 3 precursor [Homo sapiens]
Smp_008610	154.425	207.58	162.987	213.057	5.22417	18.0266	9.64683	12.8472	-4.01204	5e-05	0.000181778	236.986	185.058	199.364	237.273	3.86556	9.55676	13.3196	11.9803	-2.91496	1.50225e-27	5.39627e-26	137.856	103.478	110.602	129.896	1.81039	5.10049	6.76416	6.15567	-4.06048	1.03687e-45	5.70337e-44	GO:0004531,GO:0005622,GO:0006259,GO:0006309	deoxyribonuclease ii;Smp_008610	Deoxyribonuclease II-related [Source:UniProtKB/TrEMBL;Acc:G4LWH7]	gi|194473657|ref|NP_067056.2|	deoxyribonuclease-2-beta isoform 1 precursor [Homo sapiens]
SmVG_029173	34.2145	37.788	30.812	45.2866	0	5.03855	1.73639	2.58104	-3.98455	5e-05	0.000181778	84.6909	67.8801	66.5964	75.1341	1.30925	3.45539	9.45529	6.94814	-2.52028	1.9067e-09	1.50786e-08	78.8315	64.003	65.4364	71.8431	0.729412	3.4008	6.04403	4.18219	-3.55896	8.00876e-25	1.64311e-23
Smp_169570	31.0752	32.6488	35.4697	49.3512	1.5462	3.31102	2.75908	2.01061	-3.94768	5e-05	0.000181778	44.6873	45.7966	52.9278	68.1843	1.46153	3.33366	2.86566	2.68414	-2.76437	6.12148e-55	7.32259e-53	27.4333	27.1279	31.013	39.2962	0.725727	1.89274	1.53015	1.44177	-3.94361	4.06807e-69	6.09334e-67	GO:0000166,GO:0004367,GO:0005737,GO:0005975,GO:0006072,GO:0009331,GO:0016491,GO:0016614,GO:0016616,GO:0046168,GO:0050662,GO:0051287,GO:0055114	glycerol 3 phosphate dehydrogenase;Smp_169570	Putative glycerol-3-phosphate dehydrogenase [Source:UniProtKB/TrEMBL;Acc:G4VNX4]	gi|33695088|ref|NP_005267.2|	glycerol-3-phosphate dehydrogenase [NAD+], cytoplasmic [Homo sapiens]
Smp_104890	15.2871	14.9182	13.3611	14.3684	1.36545	0.966425	0.702472	0.808722	-3.9141	5e-05	0.000181778	15.5652	17.1017	15.3198	14.6604	0.807554	0.69947	0.693918	0.706758	-2.78581	9.03223e-64	1.50387e-61	9.89626	10.3495	9.20187	8.75824	0.417569	0.408	0.391955	0.39839	-4.03343	2.86778e-104	1.16336e-101	GO:0005230,GO:0005254,GO:0005886,GO:0006810,GO:0006811,GO:0006821,GO:0016020,GO:0016021,GO:0030054,GO:0034220,GO:0045202,GO:0045211,GO:1902476	Cys loop ligand gated ion channel subunit;Smp_104890	Putative cys-loop ligand gated ion channel subunit [Source:UniProtKB/TrEMBL;Acc:G4V7T2]	gi|110347441|ref|NP_006520.2|	glycine receptor subunit alpha-3 isoform a [Homo sapiens]
Smp_056460	16.9007	21.1423	14.3561	21.2863	1.85975	0.904814	1.03056	1.10856	-3.90944	5e-05	0.000181778	135.632	114.966	118.476	145.026	6.71891	5.85777	5.29636	4.91248	-2.83377	1.25627e-86	4.29957e-84	88.7774	71.6406	73.8152	89.5304	3.73359	3.54534	3.11918	2.87863	-4.05615	4.17979e-109	1.84975e-106		hypothetical protein;Smp_056460.6	Putative uncharacterized protein [Source:UniProtKB/TrEMBL;Acc:G4LYE9]	_	_
Smp_049850	19.0125	16.9877	23.0254	20.4094	0.999503	1.26591	1.24664	1.7915	-3.90474	5e-05	0.000181778	18.671	21.5277	29.0479	22.8942	1.07849	1.42236	1.38778	1.887	-2.50677	5.46208e-109	4.20615e-106	14.5314	15.6628	20.0741	16.5835	0.80423	1.26688	1.28808	1.3362	-3.28974	6.30329e-97	1.97964e-94	GO:0000287,GO:0004422,GO:0005829,GO:0006168,GO:0006178,GO:0009116,GO:0016020,GO:0016021,GO:0016740,GO:0016757,GO:0032263,GO:0032264,GO:0046100,GO:0052657	hypoxanthine guanine phosphoribosyltransferase;Smp_049850	Hypoxanthine-guanine phosphoribosyltransferase,putative [Source:UniProtKB/TrEMBL;Acc:G4LWP0]	gi|9910262|ref|NP_064585.1|	phosphoribosyltransferase domain-containing protein 1 [Homo sapiens]
Smp_126420	28.0513	21.4478	24.1891	26.5266	1.3262	1.43623	2.5609	1.72533	-3.8296	5e-05	0.000181778	21.188	30.8353	27.6706	27.1212	0.909078	2.14149	0.923332	1.47693	-2.75166	9.96533e-68	1.98037e-65	12.7308	17.7966	15.5666	15.2564	0.43844	1.16948	0.481292	0.746953	-3.87085	9.44293e-83	1.91534e-80	GO:0016020,GO:0016021	hypothetical protein;note=predicted by EVM2;note=tmhmm%3B%3Bquery 1-593%3B;note=%3Bquery 276-593%3B;note=%3Bquery 253-275%3B;note=%3Bquery 1-252%3B;Smp_126420	Putative uncharacterized protein [Source:UniProtKB/TrEMBL;Acc:G4V5P2]	_	_
Smp_137720	289.307	368.573	263.555	257.085	10.9031	28.2106	18.9872	24.7993	-3.82946	5e-05	0.000181778	820.798	655.815	660.532	615.432	19.7161	39.8322	55.701	50.8138	-2.58799	9.90044e-30	4.0934e-28	615.005	464.21	461.386	435.107	12.4306	27.9634	39.1961	36.1496	-3.55597	1.43106e-37	5.73365e-36		hypothetical protein;Smp_137720	Putative uncharacterized protein [Source:UniProtKB/TrEMBL;Acc:G4VBE1]	_	_
Smp_170630	51.9523	47.1261	44.5797	47.9067	3.20558	3.24548	4.00817	3.25507	-3.80408	5e-05	0.000181778	48.1625	56.742	50.8719	49.6583	2.24238	3.71339	2.31203	2.85116	-2.6643	1.11087e-144	2.28118e-141	30.2994	34.1391	30.5691	29.4726	1.1139	2.16487	1.28795	1.58589	-3.80041	2.55456e-195	1.24356e-191	GO:0005578,GO:0005615,GO:0007155,GO:0030198,GO:0050839	Periostin%2C putative;Smp_170630	_	gi|209862907|ref|NP_006466.2|	periostin isoform 1 [Homo sapiens]
Smp_143300	4.24322	3.73378	3.3357	4.64888	0.305546	0.296574	0.323337	0.224696	-3.7947	5e-05	0.000181778	4.03029	5.02097	4.09861	5.0468	0.22481	0.342426	0.199377	0.189721	-2.67672	4.49226e-41	3.33429e-39	2.48663	2.96085	2.38559	2.93428	0.122194	0.192442	0.119767	0.102965	-3.76411	1.33783e-61	1.41578e-59	GO:0005509,GO:0005515	fibrillin 1;Smp_143300	Notch [Source:UniProtKB/TrEMBL;Acc:G4LUK9]	gi|281485550|ref|NP_000129.3|	fibrillin-1 precursor [Homo sapiens]
Smp_085180	16.1729	19.288	18.5903	21.5953	0.50681	1.98068	1.23752	1.82127	-3.76968	5e-05	0.000181778	22.3852	20.1624	23.9774	25.1334	0.446954	1.29202	1.77179	1.92925	-2.67729	6.44137e-19	1.31398e-17	14.587	12.4591	14.6854	15.2509	0.325197	0.830203	1.04094	1.16703	-3.58659	2.74045e-53	2.03672e-51	GO:0006508,GO:0008234,GO:0016787	cathepsin B (C01 family);Smp_085180	Cathepsin B (C01 family) [Source:UniProtKB/TrEMBL;Acc:G4V7D1]	gi|224586907|ref|NP_055279.3|	tubulointerstitial nephritis antigen [Homo sapiens]
Smp_195090	50.3956	60.9793	77.3733	91.4126	4.21874	6.33518	5.66093	5.14463	-3.71331	5e-05	0.000181778	68.5104	64.1177	97.054	106.789	3.17922	5.59579	4.64273	4.94206	-2.61101	1.812e-69	3.91677e-67	44.7073	39.7578	60.5827	65.482	1.77502	3.4217	2.70356	2.86547	-3.75228	5.46133e-60	5.31715e-58	GO:0005509,GO:0005875,GO:0007017,GO:0030286	tegument-allergen-like protein;Smp_195090	Putative uncharacterized protein [Source:UniProtKB/TrEMBL;Acc:G4VA29]	_	_
Smp_193350	3.22643	2.63596	2.43169	2.98613	0.251479	0.271496	0.2822	0.0689386	-3.68983	5e-05	0.000181778	4.45405	5.20104	4.26166	4.64742	0.280347	0.28338	0.239958	0.230601	-2.54673	3.77011e-16	5.9477e-15	2.90935	3.21382	2.63786	3.09042	0.14037	0.214345	0.165073	0.126772	-3.62654	4.63878e-40	2.06225e-38		cadherin EGF LAG seven pass G type receptor;Smp_193350	Putative uncharacterized protein [Source:UniProtKB/TrEMBL;Acc:G4M1W9]	_	_
Smp_131410	8.20217	9.22704	9.26611	8.90929	0.59372	0.630547	0.647265	0.904764	-3.68083	5e-05	0.000181778	16.3269	14.9135	18.6119	16.9206	0.584571	0.756001	0.70993	1.3533	-2.74419	2.15584e-67	4.08647e-65	9.97062	9.02411	10.97	9.63489	0.346276	0.435043	0.404555	0.678352	-3.83529	5.77993e-91	1.5209e-88	GO:0016020,GO:0016021	hypothetical protein;note=tmhmm%3B%3Bquery 1-205%3B;Smp_131410	Putative uncharacterized protein [Source:UniProtKB/TrEMBL;Acc:G4VL03]	_	_
SmVG_000820	2.83945	3.57561	2.9096	2.95929	0.376258	0.0679945	0.407932	0.149622	-3.6161	5e-05	0.000181778	4.46218	3.62099	3.92303	3.01755	0.257423	0.393862	0.045709	0.12975	-2.80247	1.09439e-11	1.1331e-10	2.87408	2.17179	2.31696	1.8085	0.139373	0.195313	0.0765813	0.125424	-3.49373	2.21554e-37	8.76848e-36
SmVG_000192:Smp_123780	10.9501	9.2538	8.85841	9.72218	0.905662	0.403326	0.961971	0.893503	-3.61545	5e-05	0.000181778	11.7794	15.1387	12.2574	13.193	0.658689	1.19535	0.409436	0.988273	-2.58273	8.4486e-41	6.19614e-39	7.50717	9.20401	7.38825	7.87061	0.370776	0.702724	0.230214	0.586564	-3.56182	1.87193e-73	3.25449e-71		glypican 5;Smp_123780	Putative glypican [Source:UniProtKB/TrEMBL;Acc:G4V6Y2]	_	_
SmVG_000192:Smp_123790	10.9501	9.2538	8.85841	9.72218	0.905662	0.403326	0.961971	0.893503	-3.61545	5e-05	0.000181778	11.7794	15.1387	12.2574	13.193	0.658689	1.19535	0.409436	0.988273	-2.58273	8.4486e-41	6.19614e-39	7.50717	9.20401	7.38825	7.87061	0.370776	0.702724	0.230214	0.586564	-3.56182	1.87193e-73	3.25449e-71		glypican;Smp_123790	Putative uncharacterized protein [Source:UniProtKB/TrEMBL;Acc:G4V6Y1]	_	_
Smp_016490	1106	1684.75	1004.67	1275.29	68.0728	165.214	83.3024	119.398	-3.53983	5e-05	0.000181778	2051.32	1394.29	1312.77	1507.93	61.1977	87.3017	144.272	128.612	-2.45479	7.06003e-27	2.40494e-25	1321.44	854.436	801.182	907.376	32.1463	51.9127	83.4739	74.3198	-3.45456	6.27712e-34	2.17488e-32		Saposin B domain containing protein;Smp_016490	Putative uncharacterized protein [Source:UniProtKB/TrEMBL;Acc:G4VHH3]	_	_
Smp_001100	33.5781	28.5601	26.1637	30.0391	2.0885	3.30636	3.15217	1.85196	-3.50844	5e-05	0.000181778	44.0831	53.2368	45.2583	46.5429	2.35877	4.45905	3.48582	2.86806	-2.42599	2.11123e-88	7.43214e-86	27.1297	31.4401	26.3472	26.8677	1.16302	2.6001	1.956	1.57505	-3.40829	8.4778e-111	3.93047e-108	GO:0005201,GO:0005509,GO:0005515,GO:0005578,GO:0009986,GO:0016020	fibrillin 2;Smp_001100	Putative uncharacterized protein [Source:UniProtKB/TrEMBL;Acc:G4V5Q9]	gi|281485550|ref|NP_000129.3|	fibrillin-1 precursor [Homo sapiens]
SmVG_002857	42.8693	14.3533	17.1314	14.8071	3.81047	0.364811	2.97306	0.817627	-3.48449	0.0008	0.00232996	23.7983	73.7229	35.9574	32.5469	2.68651	7.67079	0.393323	1.01497	-2.7543	8.87799e-06	4.04533e-05	18.4936	55.0984	25.9738	23.3286	1.98005	5.42998	0.498377	0.856749	-3.24931	1.03971e-09	5.96853e-09
SmVG_014384:Smp_000170	6.96782	5.23961	7.67995	6.54007	0.566261	0.382981	0.627608	0.913566	-3.40758	5e-05	0.000181778	17.6413	22.3494	23.0359	21.6776	1.08217	2.40594	1.11506	2.53978	-2.27341	7.28915e-40	5.07399e-38	10.9119	13.3215	13.492	12.5973	0.535801	1.36638	0.598267	1.37038	-3.17235	5.58721e-58	4.90064e-56		kv channel interacting protein 2 (KChIP2);Smp_000170	Neurocalcin, putative [Source:UniProtKB/TrEMBL;Acc:G4LVT6]	gi|98985778|ref|NP_114430.2|	neurocalcin-delta [Homo sapiens]
SmVG_014384:Smp_000180	6.96782	5.23961	7.67995	6.54007	0.566261	0.382981	0.627608	0.913566	-3.40758	5e-05	0.000181778	17.6413	22.3494	23.0359	21.6776	1.08217	2.40594	1.11506	2.53978	-2.27341	7.28915e-40	5.07399e-38	10.9119	13.3215	13.492	12.5973	0.535801	1.36638	0.598267	1.37038	-3.17235	5.58721e-58	4.90064e-56		kv channel interacting protein 1;Smp_000180	Similar to potassium channel-interacting protein 4 isoform 4-related [Source:UniProtKB/TrEMBL;Acc:G4LVT5]	gi|22212902|ref|NP_671712.1|	Kv channel-interacting protein 4 isoform 4 [Homo sapiens]
Smp_172590	415.758	617.876	424.621	516.613	18.0859	78.9108	31.3303	58.5607	-3.40151	5e-05	0.000181778	745.456	534.609	560.622	624.176	14.3487	32.7017	62.4204	56.3831	-2.5679	5.72251e-15	8.17e-14	453.65	311.071	321.975	354.554	7.1561	18.3123	32.9585	30.2004	-3.48352	1.44664e-20	2.21454e-19	GO:0004180,GO:0004185,GO:0006508,GO:0008233,GO:0016787,GO:0051603	family S10 unassigned peptidase (S10 family);Smp_172590	Family S10 unassigned peptidase (S10 family) [Source:UniProtKB/TrEMBL;Acc:G4VHZ1]	gi|119395729|ref|NP_000299.2|	lysosomal protective protein isoform a precursor [Homo sapiens]
Smp_124740	17.7145	15.5444	13.9436	18.9347	1.97245	1.38714	1.53465	1.37639	-3.39878	5e-05	0.000181778	16.3138	19.3117	15.9814	19.5996	1.30205	1.38037	0.874022	1.13113	-2.45397	3.26781e-70	7.18976e-68	10.3709	11.7124	9.68954	11.7856	0.697342	0.808921	0.494715	0.638541	-3.50756	3.29622e-75	6.0551e-73	GO:0016020,GO:0016021	hypothetical protein;Smp_124740	Putative uncharacterized protein [Source:UniProtKB/TrEMBL;Acc:G4M1M5]	_	_
Smp_131830	8.22488	7.9504	3.34377	5.77403	0.872097	0.481249	0.842495	0.347784	-3.31379	5e-05	0.000181778	10.2266	14.8673	6.78392	9.00929	0.869642	1.07778	0.392115	0.253939	-2.50621	4.55491e-12	4.94023e-11	6.79169	9.26877	4.15044	5.46728	0.594107	0.689923	0.222444	0.173251	-3.30949	4.31646e-18	5.4578e-17		endonuclease reverse transcriptase;note=trans_spliced (SO:0000870);Smp_131830	Putative uncharacterized protein [Source:UniProtKB/TrEMBL;Acc:G4LW60]	_	_
Smp_204020	0.982394	0.892871	1.83721	1.36756	0.177653	0	0.197404	0.142529	-3.29497	0.0007	0.00207222	1.50305	1.8026	2.77662	1.85492	0.681472	0.492416	0.309304	0.199465	-1.27302	0.00217087	0.00594092	1.06603	1.3234	1.8302	1.22177	0.477672	0.340842	0.18519	0.176938	-1.62244	2.02383e-05	6.30126e-05	GO:0016020,GO:0016021	hypothetical protein;note=tmhmm%3B%3Bquery 1-403%3B;Smp_204020
Smp_002600	279.917	414.884	280.178	327.197	20.7684	53.1385	26.5603	32.9063	-3.28738	5e-05	0.000181778	572.914	411.386	425.507	447.332	17.9961	32.7841	46.2225	37.4242	-2.40604	7.42771e-31	3.29197e-29	339.015	234.074	239.086	248.386	8.52413	17.7633	23.5134	19.2859	-3.37935	1.94348e-39	8.33558e-38	GO:0004180,GO:0004185,GO:0006508,GO:0008236,GO:0008239,GO:0016787	Lysosomal Pro X carboxypeptidase;Smp_002600	Lysosomal Pro-Xaa carboxypeptidase (S28 family) [Source:UniProtKB/TrEMBL;Acc:G4VF49]	gi|62420888|ref|NP_037511.2|	dipeptidyl peptidase 2 preproprotein [Homo sapiens]
Smp_174700	5.29187	5.2662	3.90987	4.81841	0.2333	0.708044	0.60546	0.443881	-3.27624	0.0004	0.00124229	5.0797	5.56524	4.38443	4.62209	0.1726	0.498219	0.433834	0.385443	-2.3556	1.00806e-31	4.66928e-30	3.21992	3.33808	2.6008	2.72747	0.0880339	0.287	0.237046	0.211397	-3.30691	4.12654e-49	2.60883e-47	GO:0003677,GO:0003700,GO:0003707,GO:0005634,GO:0006351,GO:0006355,GO:0008270,GO:0043401,GO:0043565,GO:0046872	transcription factor HNF 4;Smp_174700	Putative hepatocyte nuclear factor 4-alpha (Hnf-4-alpha) [Source:UniProtKB/TrEMBL;Acc:G4VL93]	gi|115583654|ref|NP_004124.4|	hepatocyte nuclear factor 4-gamma [Homo sapiens]
SmVG_006871	21.279	28.7515	16.8553	24.7386	1.38439	3.19544	2.70984	2.17277	-3.27545	5e-05	0.000181778	33.0894	24.8457	22.1815	26.5745	1.86768	3.40058	4.00063	3.91053	-1.85226	1.0058e-23	2.86201e-22	19.7133	14.1152	12.3414	14.9976	0.861123	1.72847	1.43055	1.69147	-2.8823	1.89192e-46	1.07091e-44	GO:0007155,GO:0016020
Smp_170430	2.83057	4.17763	2.53236	3.5841	0.209514	0.113922	0.702287	0.343632	-3.26071	5e-05	0.000181778	6.96524	4.41903	4.257	4.71397	0.424081	1.02092	0.150696	0.290315	-2.25189	8.36413e-10	6.93036e-09	4.44582	2.7981	2.53378	2.86683	0.22305	0.630347	0.0866385	0.165863	-2.92592	1.01599e-15	1.07402e-14	GO:0000166,GO:0003884,GO:0016491,GO:0016641,GO:0046416,GO:0055114,GO:0071949	D aspartate oxidase;Smp_170430	Putative d-amino acid oxidase [Source:UniProtKB/TrEMBL;Acc:G4VDQ4]	gi|148539837|ref|NP_001908.3|	D-amino-acid oxidase [Homo sapiens]
Smp_211020	37.1409	36.8633	35.1409	35.4715	3.36688	4.50515	4.94677	2.87452	-3.20401	5e-05	0.000181778	38.0009	41.6199	39.8078	36.6941	2.25116	4.62216	3.24235	2.84238	-2.2558	2.2324e-80	6.54889e-78	23.6625	24.7984	23.4567	21.5307	1.15305	2.65184	1.8217	1.57557	-3.18037	1.26888e-111	6.17689e-109	GO:0007155,GO:0016020,GO:0016021,GO:0070492	cell adhesion molecule;Smp_211020	_	gi|105990535|ref|NP_000121.2|	coagulation factor V precursor [Homo sapiens]
Smp_160830	62.3794	92.9003	56.5748	75.206	5.59929	9.61587	6.20373	10.0645	-3.18869	0.00025	0.000810166	145	103.36	98.2457	113.857	6.51563	9.84103	10.1596	12.4726	-2.21281	6.29846e-51	6.74812e-49	89.4706	61.1325	57.4649	65.9072	3.22622	5.56267	5.45411	6.78483	-3.16543	3.5898e-62	3.927e-60	GO:0003824,GO:0008152	phospholipase d3;Smp_160830	Phospholipase d-related [Source:UniProtKB/TrEMBL;Acc:G4VFV5]	gi|307775443|ref|NP_689879.2|	inactive phospholipase D5 isoform 1 [Homo sapiens]
Smp_142490	43.0921	63.3863	42.8586	47.3713	3.61922	6.93501	6.11099	5.91119	-3.12317	5e-05	0.000181778	84.7735	60.1574	63.3635	63.0783	4.54507	7.86796	7.2612	7.79061	-2.02136	6.92983e-53	7.83325e-51	50.4759	34.6616	35.8849	35.0471	2.16261	4.26464	3.64537	3.93082	-2.88957	4.30116e-52	3.0345e-50	GO:0016020,GO:0016021	Transmembrane protein 45B;Smp_142490	Epididymal membrane protein E9-related [Source:UniProtKB/TrEMBL;Acc:G4VE75]	gi|20270331|ref|NP_620143.1|	transmembrane protein 45B [Homo sapiens]
Smp_212760	3.91836	3.08663	2.01541	2.43143	0.323879	0.407094	0.255361	0.33278	-3.11794	5e-05	0.000181778	3.13407	4.26276	2.20724	2.52163	0.248025	0.272922	0.293829	0.341768	-2.05236	6.72807e-36	3.8378e-34	2.02173	2.62276	1.39569	1.52021	0.142149	0.181767	0.216895	0.238666	-2.75859	8.71972e-28	2.11182e-26	GO:0003777,GO:0005524,GO:0005875,GO:0007018,GO:0008017,GO:0005871	kinesin%2C putative;note=pfam_scan%3BPfam:PF00225.18%3B%3BE()%3D2.0E-21%3Bscore%3D75.9%3Bqu ery 98-355%3Bdescription%3DKinesin;note=pfam_scan%3BPfam:PF00225.18%3B%3BE()%3D2.2E-7%3Bscore%3D29.8%3Bque ry 435-513%3Bdescription%3DKinesin;note=iprscan%3BInterPro:IPR001752 : Kinesin%2C motor region%3BPRINTS:PR00380%3B%3Bscore%3D3.4E-7%3Bquery 464-485%3Bdescription%3DKinesin%2C motor region;note=iprscan…	_	_	_
Smp_194190	0.98777	1.03292	0.995213	0.975832	0.130572	0.0697925	0.107409	0.158197	-3.0987	0.0004	0.00124229	2.33748	2.00767	1.91436	2.31164	0.176527	0.286709	0.236789	0.363393	-1.79819	3.8006e-09	2.89951e-08	1.40958	1.14392	1.3012	1.40481	0.083491	0.156538	0.120423	0.258348	-2.54887	1.52782e-18	2.01011e-17	GO:0004222,GO:0006508,GO:0008237	family M13 unassigned peptidase (M13 family);Smp_194190	Nep2 peptidase (M13 family) [Source:UniProtKB/TrEMBL;Acc:G4VCV0]	gi|157426891|ref|NP_004817.2|	endothelin-converting enzyme-like 1 [Homo sapiens]
Smp_028870	190.71	290.222	188.742	225.711	17.3486	36.4306	16.8151	33.9606	-3.09825	5e-05	0.000181778	664.116	454.851	487.436	517.546	20.9688	30.3541	56.8296	58.1629	-2.35563	7.81605e-20	1.71661e-18	395.934	260.248	277.466	291.388	10.3507	16.794	30.18	31.5115	-3.24246	4.37733e-26	9.577e-25	GO:0001664,GO:0005737,GO:0008047,GO:0043085	Zinc finger%2C C2H2 type domain containing protein;Smp_028870	Putative uncharacterized protein [Source:UniProtKB/TrEMBL;Acc:G4VBD6]	_	_
Smp_014570.2	334.286	468.227	307.531	344.908	26.3245	68.2834	30.6988	44.9946	-3.09481	5e-05	0.000181778	1002.92	756.111	738.531	762.386	29.2737	53.7534	81.4982	70.4309	-2.42313	1.35833e-26	4.54784e-25	620.155	448.883	432.859	441.851	14.6001	30.6674	43.7146	38.3416	-3.37944	5.80121e-34	2.01716e-32		Saposin%2CIPR008139 Saposin;note=iprscan%3BInterPro:IPR008138 : Saposin-like type B%2C 2%3BPfam:PF03489%3B%3Bscore%3D7.0E-6%3Bquery 81-115%3Bdescription%3DSaposin-like type B%2C 2;note=iprscan%3BInterPro:IPR011001 : Saposin-like%3BSuperfamily:SSF47862%3B%3Bscore%3D4.7E-10%3Bquery 129-201%3Bdescription%3DSaposin-like;note=iprscan%3BInterPro:IPR011001 : Saposin-like%3BSuperfamily:SSF47862%3B%3Bscor…
Smp_085010	317.056	461.429	342.723	404.561	24.2823	73.9677	35.5672	51.3314	-3.04278	5e-05	0.000181778	517.662	382.23	425.079	450.812	17.9574	33.6809	52.515	45.0768	-2.2668	1.24864e-21	3.15903e-20	335.766	236.481	262.774	278.241	9.96202	20.3887	31.5585	26.9113	-3.14246	6.37162e-30	1.76233e-28	GO:0004197,GO:0005615,GO:0005764,GO:0006508,GO:0008234,GO:0016787,GO:0051603	cathepsin B peptidase (C01 family);Smp_085010	Cathepsin B-like peptidase (C01 family) [Source:UniProtKB/TrEMBL;Acc:G4V5D3]	gi|224586907|ref|NP_055279.3|	tubulointerstitial nephritis antigen [Homo sapiens]
Smp_133070	7.80413	4.50966	6.27496	4.15727	0.922999	0.248825	0.930003	0.679171	-3.03194	5e-05	0.000181778	7.37122	12.1742	10.4706	6.94919	1.10577	1.4268	0.540799	0.96662	-1.96867	1.68064e-20	3.90702e-19	4.76975	7.61491	6.49481	4.27304	0.566185	0.872838	0.309321	0.529643	-2.79591	1.48509e-28	3.78504e-27	GO:0016020,GO:0016021	hypothetical protein;note=predicted by EVM2;note=tmhmm%3B%3Bquery 1-371%3B;note=%3Bquery 1-166%3B;note=%3Bquery 167-189%3B;note=%3Bquery 190-371%3B;Smp_133070	Putative uncharacterized protein [Source:UniProtKB/TrEMBL;Acc:G4V8F2]	_	_
Smp_158520	20.3819	30.5425	18.7923	24.9344	1.80149	4.12538	2.71287	3.09407	-3.01195	5e-05	0.000181778	30.1446	22.8665	21.869	24.758	1.23026	2.2444	2.696	2.46142	-2.19984	7.19612e-35	3.95819e-33	18.4808	13.5296	12.7146	14.3329	0.597205	1.25224	1.41501	1.3756	-3.12722	2.65729e-44	1.39304e-42	GO:0004144,GO:0016740,GO:0016746,GO:0016747	diacylglycerol O acyltransferase;Smp_158520	Putative diacylglycerol O-acyltransferase [Source:UniProtKB/TrEMBL;Acc:G4V6S2]	gi|38348340|ref|NP_940914.1|	diacylglycerol O-acyltransferase 2-like protein 6 [Homo sapiens]
Smp_006760	11.5948	14.0893	11.3105	12.3822	0.851241	2.0261	1.81203	1.46473	-3.00421	5e-05	0.000181778	16.0881	13.8579	14.9858	13.9617	0.904615	1.79801	1.53804	1.62152	-2.06808	9.51081e-67	1.74899e-64	9.99309	8.17791	8.81821	8.06927	0.455608	1.0259	0.883711	0.954434	-2.88267	1.60824e-64	1.90949e-62	GO:0005764,GO:0016020,GO:0016021	fasting inducible integral membrane protein;Smp_006760	Fasting-inducible integral membrane protein tm6p1-related [Source:UniProtKB/TrEMBL;Acc:C4PYV9]	gi|110825978|ref|NP_060840.2|	DNA damage-regulated autophagy modulator protein 1 [Homo sapiens]
SmVG_024019	8.46508	7.75115	7.69712	7.92891	0.858821	1.28842	0.879269	0.957111	-2.99879	5e-05	0.000181778	6.61777	9.42771	7.48955	6.27803	0.115459	0.36183	0.096605	5.54121e-05	-4.20059	5.71715e-08	3.71132e-07	5.48102	5.9347	5.97016	5.68402	0.375408	0.621967	0.509434	0.630321	-2.8937	3.67014e-77	7.00637e-75
Smp_134540	2.12673	2.27148	2.67164	2.95826	0.380388	0.296999	0.225121	0.357233	-2.99285	0.0216	0.0432136	2.48116	2.79423	3.01619	3.50184	0.375657	0.223259	0.214594	0.387416	-2.02743	2.29471e-24	6.78013e-23	1.61509	1.78969	1.89316	2.176	0.25331	0.165151	0.115711	0.233044	-2.7347	3.13328e-26	6.90173e-25	GO:0016020,GO:0016021	hypothetical protein;Smp_134540	Putative uncharacterized protein [Source:UniProtKB/TrEMBL;Acc:G4VN10]	_	_
Smp_170280	24.085	16.4473	11.8833	15.3571	2.1846	1.54088	3.39221	1.42279	-2.98831	5e-05	0.000181778	18.2394	28.7136	14.822	17.471	1.7335	3.43378	1.34777	1.41226	-2.08484	1.11431e-17	2.037e-16	11.3639	17.1312	8.7736	10.2711	0.87968	1.96714	0.748121	0.777759	-2.93531	2.94942e-26	6.54112e-25	GO:0007155,GO:0007229,GO:0008305,GO:0016020,GO:0016021	integrin alpha ps;Smp_170280	Putative integrin alpha-ps [Source:UniProtKB/TrEMBL;Acc:G4V8A1]	_	_
Smp_200730	4.93948	2.27912	2.36552	2.16442	0.651545	0.235347	0.597726	0	-2.98432	0.00105	0.00298433	2.11141	4.25524	2.11345	1.99329	0.359076	0.432617	0.126066	0	-2.25854	6.25314e-05	0.000239642	1.46299	2.98193	1.50495	1.45202	0.260712	0.321487	0.0751497	0	-2.81461	6.62009e-09	3.44301e-08	GO:0016020,GO:0016021	hypothetical protein;note=tmhmm%3B%3Bquery 1-170%3B;Smp_200730
Smp_167730	5.06107	5.49321	5.73189	6.55869	0.986223	0.964401	0.645133	0.292757	-2.98347	5e-05	0.000181778	6.72681	5.21343	6.74284	7.31552	0.777094	0.561111	0.638968	0.36865	-2.12686	1.04776e-19	2.26879e-18	4.51805	3.61722	4.3592	4.71664	0.406495	0.42254	0.362069	0.208065	-3.06238	1.56658e-33	5.29593e-32		neural cadherin;Smp_167730	Putative uncharacterized protein [Source:UniProtKB/TrEMBL;Acc:G4VRF0]	_	_
Smp_158480	11.5443	13.6625	13.4746	14.5122	1.16578	1.89431	1.52491	2.35327	-2.93861	5e-05	0.000181778	14.9662	13.7595	16.2598	15.7194	0.77985	1.42954	1.34216	2.04344	-2.17186	3.35302e-45	2.82963e-43	9.22475	8.14919	9.46681	9.07958	0.387719	0.802664	0.724168	1.1431	-3.04897	6.78064e-59	6.16975e-57	GO:0003824,GO:0008152,GO:0016874	AMP dependent ligase;Smp_158480	Putative amp dependent ligase [Source:UniProtKB/TrEMBL;Acc:G4V6R7]	_	_
Smp_175390	10.0261	9.76775	8.30168	10.3788	1.05664	1.49099	1.55188	0.93476	-2.93404	5e-05	0.000181778	9.6379	10.4821	9.31689	10.0956	0.955215	1.40246	1.11813	0.862231	-1.95981	7.40743e-60	1.04905e-57	6.00502	6.30127	5.60786	6.03846	0.526097	0.880912	0.699682	0.557381	-2.63474	9.32116e-65	1.12038e-62		hypothetical protein;Smp_175390	Putative uncharacterized protein [Source:UniProtKB/TrEMBL;Acc:C4QMY8]	_	_
Smp_137150	4.34464	4.74358	3.16291	4.15587	0.515744	0.568075	0.722903	0.37813	-2.9087	5e-05	0.000181778	5.50337	5.53669	4.38045	5.12411	0.409054	0.948832	0.440594	0.391477	-2.02561	2.02067e-25	6.25546e-24	3.53036	3.39375	2.67921	3.07433	0.210654	0.561844	0.280769	0.251193	-2.73263	7.89116e-35	2.86673e-33	GO:0003824,GO:0004553,GO:0004567,GO:0005975,GO:0008152,GO:0016020,GO:0016021,GO:0016787,GO:0016798,GO:0043231,GO:0046355	beta mannosidase;Smp_137150	Putative beta-mannosidase [Source:UniProtKB/TrEMBL;Acc:G4VID6]	gi|84798622|ref|NP_005899.3|	beta-mannosidase precursor [Homo sapiens]
Smp_180850	3.28081	3.04578	1.99221	2.19529	0.283309	0	0.457607	0.675097	-2.89242	0.0033	0.0083105	2.41279	3.36483	1.7527	1.44952	0.345645	0.500319	0	0.352457	-1.80252	0.00047258	0.00150885	2.33639	2.21876	1.18584	1.29856	0.167955	0.358372	0	0.280625	-2.44149	1.92439e-07	8.25939e-07	GO:0016020,GO:0016021	hypothetical protein;Smp_180850	Putative uncharacterized protein [Source:UniProtKB/TrEMBL;Acc:G4M109]	_	_
SmVG_014953:Smp_075800	1173.6	1658.61	1099.83	1312.09	85.7454	310.028	110.716	201.348	-2.88922	5e-05	0.000181778	3643.07	2630.5	2543.95	2770.67	109.975	209.137	396.966	358.186	-2.22083	4.33845e-14	5.69873e-13	2269.68	1579.04	1508.83	1627.05	56.2757	120.772	219.751	197.217	-3.02058	2.729e-18	3.5285e-17		hemoglobinase (C13 family);Smp_075800	Hemoglobinase [Source:UniProtKB/Swiss-Prot;Acc:P09841]	gi|56682964|ref|NP_001008530.1|	legumain preproprotein [Homo sapiens]
SmVG_014953:Smp_179170	1173.6	1658.61	1099.83	1312.09	85.7454	310.028	110.716	201.348	-2.88922	5e-05	0.000181778	3643.07	2630.5	2543.95	2770.67	109.975	209.137	396.966	358.186	-2.22083	4.33845e-14	5.69873e-13	2269.68	1579.04	1508.83	1627.05	56.2757	120.772	219.751	197.217	-3.02058	2.729e-18	3.5285e-17		hemoglobinase (C13 family);Smp_179170
Smp_042720	3.95367	5.77794	4.85989	4.71361	0.640248	0.701088	0.702826	0.569924	-2.8846	5e-05	0.000181778	5.22279	3.83597	4.98092	4.31287	0.387937	0.560008	0.41685	0.439436	-2.02934	3.51566e-21	8.57751e-20	3.31331	2.33685	3.02246	2.60744	0.202837	0.328744	0.23727	0.248759	-2.92831	1.13857e-35	4.24719e-34	GO:0000139,GO:0005794,GO:0006486,GO:0008378,GO:0016020,GO:0016021,GO:0016740,GO:0016757	beta 13 n galactosyltransferase;Smp_042720	Beta-1,3-n-acetylglucosaminyltransferase,putati ve [Source:UniProtKB/TrEMBL;Acc:G4VQL1]	gi|14042986|ref|NP_114436.1|	UDP-GlcNAc:betaGal beta-1,3-N-acetylglucosaminyltransferase 5 [Homo sapiens]
Smp_149820	6.73238	6.65232	4.47979	6.45027	1.01588	1.167	0.701407	0.556677	-2.82095	0.00095	0.0027228	12.1346	13.4624	8.05015	9.0676	0.944257	1.09032	1.15202	0.778403	-2.09262	1.95656e-30	8.37041e-29	7.70228	8.1182	4.83165	5.41179	0.485155	0.670283	0.643052	0.4323	-3.00563	5.11042e-36	1.92104e-34	GO:0016020,GO:0016263,GO:0016267,GO:0016740,GO:0016757	glycoprotein N acetylgalactosamine;Smp_149820	Putative core 1 udp-galactose:n-acetylgalactosamine-alpha-r beta 1,3-galactosyltransferase [Source:UniProtKB/TrEMBL;Acc:G4VI51]	gi|9910144|ref|NP_064541.1|	glycoprotein-N-acetylgalactosamine 3-beta-galactosyltransferase 1 [Homo sapiens]
Smp_132270	29.269	30.4663	19.4245	24.5325	2.63888	3.78755	5.01371	3.54489	-2.79072	5e-05	0.000181778	29.5384	31.3471	21.8711	25.0567	1.79614	4.31966	2.51094	3.12485	-1.99468	2.69081e-36	1.60162e-34	18.7587	19.0605	13.155	14.9435	0.935378	2.58758	1.41999	1.72605	-2.80623	2.42253e-50	1.59363e-48	GO:0003676,GO:0003723	poly(rC) binding protein 3;Smp_132270	Putative poly(Rc) binding protien [Source:UniProtKB/TrEMBL;Acc:G4VGP4]	gi|222352151|ref|NP_006187.2|	poly(rC)-binding protein 1 [Homo sapiens]
Smp_171580	5.75683	7.22178	6.50838	7.66803	0.828432	0.722385	0.989752	1.40413	-2.78323	5e-05	0.000181778	9.3643	8.43751	9.90864	9.80868	0.766788	1.43896	1.03004	1.81619	-1.78065	7.76143e-34	4.05206e-32	6.11414	5.21337	6.03279	6.28726	0.390191	0.874207	0.713679	1.16246	-2.41963	6.78011e-33	2.23011e-31	GO:0003824,GO:0004058,GO:0006520,GO:0016829,GO:0016831,GO:0019752,GO:0030170	aromatic amino acid decarboxylase;Smp_171580	Aromatic-L-amino-acid decarboxylase (AADC) (DOPA decarboxylase) (DDC),putative [Source:UniProtKB/TrEMBL;Acc:G4LVM4]	gi|338968917|ref|NP_001229816.1|	aromatic-L-amino-acid decarboxylase isoform 3 [Homo sapiens]
SmVG_008995	4.37389	5.9304	3.14707	3.99793	0.550015	0.783704	0.772666	0.429771	-2.78245	5e-05	0.000181778	5.3735	4.19338	3.78069	3.56892	0.300376	0.651169	0.741754	0.307642	-1.85638	8.67348e-08	5.47189e-07	3.42686	2.50044	2.09897	2.03767	0.158639	0.387267	0.24419	0.17629	-2.78411	3.71925e-15	3.71391e-14
Smp_147070	42.9368	39.6887	44.475	48.1573	6.90104	5.51276	7.6785	5.3812	-2.78241	5e-05	0.000181778	42.0464	48.982	52.4823	51.6423	4.9657	6.91775	3.51101	4.66548	-2.03794	9.20943e-61	1.3671e-58	26.2485	29.4399	31.2048	30.2603	2.54299	3.99291	1.93247	2.62207	-2.86723	2.47408e-86	5.73516e-84	GO:0003333,GO:0005783,GO:0015171,GO:0016020,GO:0016021	sodium coupled neutral amino acid;Smp_147070	Putative amino acid transporter [Source:UniProtKB/TrEMBL;Acc:G4VKU1]	gi|222418629|ref|NP_775785.2|	putative sodium-coupled neutral amino acid transporter 9 [Homo sapiens]
Smp_146840	12.782	9.58243	7.48296	10.1231	1.6845	1.36993	1.49837	1.26092	-2.7814	5e-05	0.000181778	10.9802	16.3321	9.67265	11.4992	1.14059	1.52602	0.999552	1.22513	-2.01803	1.01684e-51	1.11862e-49	6.89136	9.81705	5.71127	6.76947	0.571416	0.88768	0.552849	0.690167	-2.89983	3.3692e-46	1.8852e-44	GO:0005515,GO:0005576	netrin;Smp_146840	Putative netrin [Source:UniProtKB/TrEMBL;Acc:G4VPQ4]	gi|148613884|ref|NP_004813.2|	netrin-1 precursor [Homo sapiens]
Smp_143720	7.14013	3.12018	3.0628	3.27759	0.291936	0.606315	0.614745	0.90254	-2.78083	0.00035	0.00110242	3.18626	6.27524	2.74209	2.58973	0.154876	0.7832	0.647842	0.631626	-1.59196	0.000136464	0.00048792	2.72114	4.38514	2.64332	1.93223	0.0950853	0.436546	0.42682	0.508101	-2.46078	2.3344e-09	1.27971e-08		hypothetical protein;Smp_143720	Putative uncharacterized protein [Source:UniProtKB/TrEMBL;Acc:G4VKG2]	_	_
Smp_123880	220.624	340.119	204.124	223.647	20.3064	48.0743	42.8096	32.8333	-2.77896	5e-05	0.000181778	506.975	390.975	372.877	341.189	17.5231	49.0378	40.8905	32.9824	-2.2165	2.18394e-25	6.74393e-24	335.383	246.601	234.135	212.106	9.70853	30.2068	24.6101	19.8319	-3.09744	4.75881e-38	1.94671e-36	GO:0016020,GO:0016021	hypothetical protein;Smp_123880	Putative uncharacterized protein [Source:UniProtKB/TrEMBL;Acc:G4V6W8]	_	_
Smp_202610	788.783	1169.52	843.506	948.73	78.2726	210.639	104.072	157.922	-2.76722	5e-05	0.000181778	1097.99	802.487	895.36	886.48	51.0228	87.3537	129.909	127.665	-1.99641	4.29795e-19	8.88508e-18	727.508	505.521	561.273	558.116	28.0515	53.7568	79.1926	77.5946	-2.76158	3.83261e-26	8.40412e-25	GO:0001664,GO:0005737,GO:0008047,GO:0043085	hypothetical protein;note=iprscan%3BInterPro:IPR011001 : Saposin-like%3BSuperfamily:SSF47862%3B%3Bscore%3D1.5E-14%3Bquery 39-118%3Bdescription%3DSaposin-like;note=iprscan%3BPANTHER:PTHR11480%3B%3Bscore%3D7.8E-6%3Bquery 42-121%3Bdescription%3Dnull;Smp_202610	Putative uncharacterized protein Smp_202610 [Source:UniProtKB/TrEMBL;Acc:G4VHH2]	_	_
Smp_086480	249.251	268.833	274.679	326.523	36.7432	46.8433	42.9886	39.9254	-2.74898	5e-05	0.000181778	253.568	255.514	293.357	311.123	23.1999	35.9233	29.221	32.917	-1.95378	1.73529e-159	7.12684e-156	161.7	156.414	177.114	186.683	12.1853	20.987	16.4065	18.4054	-2.78276	7.01424e-126	5.25313e-123	GO:0005509,GO:0005875,GO:0007017,GO:0030286	tegument-allergen-like protein;Sm21.7%3Bcurrent%3Dfalse;Smp_086480	Antigen Sm21.7 [Source:UniProtKB/Swiss-Prot;Acc:P32070]	_	_
Smp_000190	25.121	33.3367	25.9093	28.7427	3.60801	5.17754	3.82355	4.22362	-2.74838	5e-05	0.000181778	41.97	34.041	35.8432	36.1606	3.28684	4.26028	4.28934	4.56926	-1.94314	2.20847e-127	3.0234e-124	24.8713	19.4336	20.2745	20.1526	1.64496	2.41786	2.33134	2.44756	-2.71053	3.71765e-104	1.4478e-101	GO:0000166,GO:0008152,GO:0016491,GO:0055114	short chain dehydrogenase:reductase family 16C;Smp_000190	Oxidoreductase, short chain dehydrogenase/reductase family, putative [Source:UniProtKB/TrEMBL;Acc:G4LVT4]	_	_
Smp_212430	3.37981	2.9054	2.41677	3.39842	0.260923	0.840296	0.403483	0.298329	-2.74656	5e-05	0.000181778	1.78116	2.68908	1.61637	2.32348	0.184134	0.284585	0.371044	0.190272	-1.83875	1.92881e-16	3.15185e-15	1.74988	2.08857	1.56372	1.97435	0.0928082	0.223158	0.333386	0.207393	-2.6091	1.16022e-23	2.17229e-22		nuclear hormone receptor;Smp_212430	Putative nuclear hormone receptor [Source:UniProtKB/TrEMBL;Acc:G4VD33]	_	_
Smp_139160	472.042	634.368	455.478	608.502	35.8558	137.142	51.7048	101.576	-2.73378	5e-05	0.000181778	962.577	748.072	750.828	905.899	35.199	63.5704	135.679	120.335	-2.09678	2.63144e-11	2.61257e-10	627.412	467.151	465.167	553.09	18.973	38.5566	78.933	69.0825	-2.82023	1.70767e-15	1.75935e-14	GO:0004197,GO:0005615,GO:0005764,GO:0006508,GO:0008233,GO:0008234,GO:0016787,GO:0051603	SmCL2 peptidase (C01 family);Smp_139160	SmCL2-like peptidase (C01 family) [Source:UniProtKB/TrEMBL;Acc:G4LUV1]	gi|22202619|ref|NP_666023.1|	cathepsin L1 preproprotein [Homo sapiens]
Smp_131600	5.4139	4.1768	3.38077	4.1444	0.504565	0.486308	0.960759	0.630753	-2.72856	5e-05	0.000181778	3.94452	5.48273	3.53857	3.93874	0.363126	0.835872	0.336254	0.535219	-1.88187	2.92307e-25	8.98133e-24	2.49408	3.30856	2.11186	2.33852	0.187183	0.485946	0.1885	0.299327	-2.62165	1.10309e-29	3.02526e-28	GO:0005509,GO:0005886,GO:0007155,GO:0007156,GO:0016020,GO:0016021	cadherin;Smp_131600	Putative cadherin [Source:UniProtKB/TrEMBL;Acc:G4VF39]	gi|9256586|ref|NP_061729.1|	protocadherin alpha-3 isoform 1 precursor [Homo sapiens]
Smp_003440	27.2168	24.951	23.7437	25.2009	3.25529	4.12624	4.14353	3.8173	-2.72037	5e-05	0.000181778	33.1284	38.1694	35.5288	34.0679	3.71987	5.54739	4.26975	4.4648	-1.79995	6.19545e-89	2.24512e-86	20.3766	22.5936	20.7336	19.7425	1.90313	3.21741	2.29344	2.38174	-2.54881	9.3687e-112	4.80072e-109	GO:0016020,GO:0016021	stomatin;Smp_003440	Putative spfh domain / Band 7 family protein [Source:UniProtKB/TrEMBL;Acc:G4V6P0]	gi|7657615|ref|NP_055440.1|	podocin [Homo sapiens]
Smp_069120	20.5249	11.2248	11.2229	10.966	1.47757	2.09764	3.46922	1.16783	-2.71547	5e-05	0.000181778	11.3366	23.2942	12.3556	11.4237	1.25006	2.94989	1.15133	1.2822	-1.91623	4.49816e-15	6.49728e-14	7.31417	14.3455	7.5056	6.90449	0.660182	1.75012	0.650236	0.777291	-2.68328	1.31289e-17	1.60784e-16	GO:0005509,GO:0005515,GO:0005544,GO:0005886,GO:0006906,GO:0016020,GO:0016021,GO:0017158,GO:0019905,GO:0030276,GO:0048791,GO:0098793	synaptotagmin 2;Smp_069120	Synaptotagmin, putative [Source:UniProtKB/TrEMBL;Acc:G4LZR2]	gi|40068038|ref|NP_057608.2|	synaptotagmin-17 [Homo sapiens]
Smp_013950	46.851	48.3754	42.7042	47.6228	7.53923	5.72833	7.93987	7.06945	-2.71414	5e-05	0.000181778	55.9974	59.7889	55.8235	53.8311	5.75442	8.3356	4.43393	6.94687	-1.93973	1.31288e-98	6.22156e-96	33.5727	34.4677	31.6578	30.1377	2.76408	4.55922	2.28833	3.57464	-2.73678	6.11903e-116	3.5044e-113	GO:0016020,GO:0016021,GO:0055085	solute carrier family 43;Smp_013950	Selectively expressed in embryonic epithelia protein-1 , putative [Source:UniProtKB/TrEMBL;Acc:G4LVI4]	gi|18252047|ref|NP_060081.1|	solute carrier family 43 member 3 [Homo sapiens]
Smp_151500	19.466	22.8237	19.0867	24.0735	3.51231	3.52011	3.65125	2.37902	-2.70963	5e-05	0.000181778	26.6591	24.1014	25.1098	26.5297	2.49752	4.08306	2.59854	2.17109	-1.94781	7.3457e-47	6.55843e-45	21.1597	18.082	18.8563	19.9185	1.58966	2.98975	1.82004	1.73107	-2.73731	3.96308e-57	3.44505e-55	GO:0016020,GO:0016021	hypothetical protein;Smp_151500	Putative uncharacterized protein [Source:UniProtKB/TrEMBL;Acc:G4VH70]	_	_
Smp_145320	6.478	5.99274	4.65481	5.8975	1.29839	0.560007	1.03759	0.716383	-2.67206	5e-05	0.000181778	9.91663	11.3613	8.88737	9.20834	1.56013	1.82434	0.941965	1.51605	-1.665	4.30715e-34	2.26788e-32	6.24903	6.76062	5.30321	5.40339	0.804262	1.04544	0.576086	0.895899	-2.28982	1.78592e-42	8.69386e-41	GO:0005254,GO:0005887,GO:0008271,GO:0008272,GO:0015106,GO:0015116,GO:0015301,GO:0015701,GO:0016020,GO:0016021,GO:0019531,GO:0019532,GO:0042391,GO:0051453,GO:0055085,GO:1902358,GO:1902476	solute carrier family 26;Smp_145320	Putative sulfate transporter [Source:UniProtKB/TrEMBL;Acc:G4VIT5]	gi|4557535|ref|NP_000102.1|	chloride anion exchanger [Homo sapiens]
SmVG_008238:Smp_090010	1.84429	1.84993	1.83847	2.03631	0.274976	0.263858	0.37982	0.272564	-2.66766	5e-05	0.000181778	2.75637	2.67589	3.24055	3.02365	0.299843	0.566392	0.491907	0.703369	-1.51407	1.92268e-30	8.25414e-29	1.73081	1.6912	1.97242	1.79367	0.187477	0.396162	0.278228	0.439218	-1.94728	1.21401e-30	3.46616e-29		molybdenum cofactor biosynthesis protein C;Smp_090010	Putative molybdopterin cofactor synthesis protein A [Source:UniProtKB/TrEMBL;Acc:G4VCX4]	_	_
SmVG_008238:Smp_171270	1.84429	1.84993	1.83847	2.03631	0.274976	0.263858	0.37982	0.272564	-2.66766	5e-05	0.000181778	2.75637	2.67589	3.24055	3.02365	0.299843	0.566392	0.491907	0.703369	-1.51407	1.92268e-30	8.25414e-29	1.73081	1.6912	1.97242	1.79367	0.187477	0.396162	0.278228	0.439218	-1.94728	1.21401e-30	3.46616e-29		Molybdenum cofactor biosynthesis protein 1;Smp_171270
Smp_168720	4.77025	4.67708	3.79338	3.94554	0.839433	0.395675	0.699009	0.806787	-2.64853	5e-05	0.000181778	4.71393	5.03615	4.25423	3.72992	0.547754	0.632761	0.410367	0.90122	-1.70008	5.229e-12	5.62186e-11	3.04814	3.12662	2.61358	2.27938	0.290196	0.377628	0.236114	0.490747	-2.45166	2.20809e-24	4.43256e-23		hypothetical protein;Smp_168720
Smp_074430	58.8893	84.4244	55.1464	67.9051	4.90742	13.8374	10.3958	13.4808	-2.64375	5e-05	0.000181778	74.9728	53.7736	51.1861	61.1006	3.20742	9.41382	8.66457	11.7031	-1.79467	8.73724e-12	9.15404e-11	62.7961	45.4227	42.9717	49.4123	2.48345	7.34468	7.36501	8.67906	-2.44211	6.25086e-22	1.03854e-20	GO:0016020,GO:0016021	hypothetical protein;Smp_074430	Putative uncharacterized protein [Source:UniProtKB/TrEMBL;Acc:G4VLD1]	_	_
Smp_161210	2.66093	2.38472	2.2388	2.52102	0.413575	0.381951	0.496264	0.284446	-2.6371	5e-05	0.000181778	2.7606	3.16992	2.96132	2.737	0.345702	0.616655	0.378761	0.37577	-1.67099	1.81942e-32	8.79102e-31	1.72469	1.90358	1.75435	1.60283	0.191694	0.371764	0.22724	0.204887	-2.25666	3.56533e-40	1.5923e-38	GO:0016020,GO:0016021	hypothetical protein;Smp_161210	Putative uncharacterized protein [Source:UniProtKB/TrEMBL;Acc:G4VCY1]	_	_
Smp_201130	20.5762	21.3667	25.3444	24.4301	3.54633	3.23854	3.3788	4.58614	-2.6365	5e-05	0.000181778	24.5337	24.2681	30.521	29.9592	2.72808	3.80554	3.04699	4.07784	-1.81195	1.28363e-54	1.50624e-52	15.6072	14.7892	18.466	17.9406	1.45643	2.21239	1.681	2.25903	-2.58495	9.99939e-57	8.25034e-55	GO:0016020,GO:0016021	hypothetical protein;note=tmhmm%3B%3Bquery 1-225%3B;note=%3Bquery 1-59%3B;note=%3Bquery 138-143%3B;note=%3Bquery 189-225%3B;note=%3Bquery 60-82%3B;note=%3Bquery 115-137%3B;note=%3Bquery 144-166%3B;note=%3Bquery 171-188%3B;note=%3Bquery 83-114%3B;note=%3Bquery 167-170%3B;Smp_201130
Smp_094710	6.79604	6.11477	8.15498	9.20661	1.16937	1.63208	0.909325	1.15801	-2.63637	5e-05	0.000181778	14.4571	16.6012	21.7811	23.057	1.53275	2.15437	3.00871	2.66929	-1.84183	3.7703e-25	1.1527e-23	8.40066	9.53042	12.1148	12.5329	0.698407	1.12647	1.43087	1.28193	-2.6235	1.64634e-32	5.29003e-31	GO:0016020,GO:0016021	alstrom syndrome protein;note=predicted by EVM2;note=tmhmm%3B%3Bquery 1-1276%3B;note=%3Bquery 1-12%3B;note=%3Bquery 1073-1276%3B;note=%3Bquery 13-35%3B;note=%3Bquery 1050-1072%3B;note=%3Bquery 36-1049%3B;Smp_094710	Putative alstrom syndrome protein [Source:UniProtKB/TrEMBL;Acc:G4V9M6]	_	_
Smp_026810	2.0147	2.15242	2.22291	1.59887	0.260627	0.225645	0.446054	0.388944	-2.59607	5e-05	0.000181778	3.25273	3.02008	3.29785	2.47242	0.308547	0.625354	0.370564	0.596046	-1.61869	2.53881e-33	1.27157e-31	2.52212	2.42582	2.32778	1.88134	0.336234	0.702365	0.394044	0.553162	-1.6729	1.37609e-27	3.26771e-26	GO:0007155,GO:0016020,GO:0016021	lysosome membrane protein 2;Smp_026810	Scavenger receptor class B type-2 (Sr-B2),putative [Source:UniProtKB/TrEMBL;Acc:G4LUS7]	_	_
Smp_197370	237.503	205.345	216.296	244.688	34.3451	39.2897	38.9334	37.7572	-2.58796	5e-05	0.000181778	306.426	363.485	324.025	343.865	34.0684	49.2567	41.8524	45.3913	-1.80552	4.22935e-157	1.30275e-153	166.613	189.293	166.208	174.943	14.3812	24.2858	18.7964	21.282	-2.57468	7.16807e-125	4.65256e-122	GO:0005201,GO:0005578,GO:0005581	hypothetical protein;Smp_197370	Putative uncharacterized protein [Source:UniProtKB/TrEMBL;Acc:G4VFE1]	gi|89276751|ref|NP_000084.3|	collagen alpha-1(V) chain preproprotein [Homo sapiens]
Smp_055780	30.9613	39.9888	33.0134	39.8819	4.1567	7.79699	5.60998	6.63182	-2.57171	5e-05	0.000181778	46.7753	38.3338	42.4791	46.8971	3.08503	5.59231	5.63456	6.50268	-1.89808	5.7113e-41	4.21371e-39	28.6847	22.7093	24.8883	27.0258	1.57493	3.19044	3.03444	3.57379	-2.66322	4.24922e-57	3.6611e-55	GO:0000166,GO:0005524,GO:0006200,GO:0006810,GO:0006855,GO:0008559,GO:0016020,GO:0016021,GO:0016787,GO:0016887,GO:0017111,GO:0042626,GO:0042908,GO:0055085	smdr2;Smp_055780	Smdr2 [Source:UniProtKB/TrEMBL;Acc:G4VHK5]	gi|21536378|ref|NP_003733.2|	bile salt export pump [Homo sapiens]
Smp_139240	415.936	630.847	396.392	486.31	40.3983	132.286	56.8591	99.1322	-2.55348	5e-05	0.000181778	602.56	424.482	419.772	462.791	25.398	48.0052	83.9164	81.3054	-1.89641	2.19007e-11	2.19917e-10	392.251	264.058	259.572	283.399	13.6091	28.5826	48.9954	47.1316	-2.57602	7.67695e-16	8.19548e-15	GO:0004197,GO:0005615,GO:0005764,GO:0006508,GO:0008234,GO:0016020,GO:0016021,GO:0051603	cathepsin S (C01 family);Smp_139240	Peptidase C1 family [Source:UniProtKB/TrEMBL;Acc:G4LUT7]	gi|23110962|ref|NP_004070.3|	cathepsin S isoform 1 preproprotein [Homo sapiens]
Smp_196840	136.08	110.744	135.09	152.363	19.2049	23.4091	25.5966	23.9209	-2.53582	5e-05	0.000181778	153.28	195.441	190.667	199.216	17.6747	30.2843	22.9227	26.3666	-1.78101	1.3249e-97	5.83005e-95	85.1477	104.128	100.154	103.78	7.59445	15.2488	10.5969	12.5721	-2.5381	4.66908e-89	1.19627e-86	GO:0005201,GO:0005578,GO:0005581	collagen alpha 1(II) chain;Smp_196840	Putative uncharacterized protein [Source:UniProtKB/TrEMBL;Acc:G4V6S8]	gi|89363017|ref|NP_000384.2|	collagen alpha-2(V) chain preproprotein [Homo sapiens]
SmVG_008556	1.5056	2.02241	1.26439	2.18623	0.475607	0.169903	0.172811	0.385868	-2.53488	0.00095	0.0027228	2.64281	2.34632	1.79292	2.4144	0.291462	0.280803	0.205791	0.298591	-1.76062	2.66874e-05	0.000110452	1.66558	1.46217	1.06971	1.43833	0.198634	0.193104	0.114978	0.166705	-2.46973	3.19856e-10	1.9561e-09
Smp_187140	419.549	623.094	375.692	447.229	44.3969	121.492	71.2004	85.9668	-2.52975	5e-05	0.000181778	609.125	435.751	405.505	433.344	29.4342	61.7169	76.5559	72.0593	-1.83669	1.75111e-16	2.87672e-15	385.959	263.971	244.172	257.869	15.2945	35.9854	43.4126	40.4319	-2.55984	2.62285e-23	4.80001e-22	GO:0004197,GO:0005615,GO:0005764,GO:0006508,GO:0008234,GO:0051603	cathepsin L proteinase;Smp_187140	Subfamily C1A non-peptidase homologue (C01 family) [Source:UniProtKB/TrEMBL;Acc:G4LUV4]	gi|22202619|ref|NP_666023.1|	cathepsin L1 preproprotein [Homo sapiens]
Smp_123820	2.26616	1.77494	1.79276	1.88863	0.212847	0.589611	0.298484	0.237317	-2.52871	5e-05	0.000181778	1.84855	2.5419	2.06818	2.04656	0.1365	0.275615	0.382937	0.197385	-1.91067	4.45096e-12	4.84027e-11	1.21182	1.56987	1.31721	1.20502	0.0710833	0.169172	0.212696	0.111894	-2.7047	2.30278e-25	4.8423e-24		serine rich repeat protein 2;note=predicted by EVM2;Smp_123820	Putative serine-rich repeat protein 2 [Source:UniProtKB/TrEMBL;Acc:G4V6X7]	_	_
Smp_164590	111.354	86.6997	94.3673	107.992	15.5985	17.5494	20.0837	16.3446	-2.52482	5e-05	0.000181778	133.396	174.578	148.437	158.124	16.854	26.8657	19.2227	21.8605	-1.73083	3.07328e-111	2.91276e-108	77.7781	97.5716	82.4198	87.2026	7.84282	14.3609	9.78056	11.2427	-2.46573	2.22268e-98	7.46207e-96	GO:0005201,GO:0005515,GO:0005578,GO:0005581	fibrillar collagen chain FAp1 alpha;Smp_164590	Putative collagen alpha-1(V) chain [Source:UniProtKB/TrEMBL;Acc:G4VFE0]	gi|98985810|ref|NP_542196.2|	collagen alpha-1(XI) chain isoform B preproprotein [Homo sapiens]
Smp_141520	7.69945	5.86667	5.20692	6.44579	1.04061	0.898007	1.4826	1.00904	-2.50904	5e-05	0.000181778	6.47257	8.41672	5.91557	7.04025	0.689634	1.5497	0.927801	0.889383	-1.69679	1.4599e-27	5.2595e-26	4.25215	5.30414	3.80948	4.35975	0.391831	0.943031	0.513657	0.531241	-2.38457	1.65269e-34	5.80888e-33	GO:0005515	E3 ubiquitin protein ligase PDZRN3;Smp_141520	Putative uncharacterized protein [Source:UniProtKB/TrEMBL;Acc:G4VMF4]	gi|257196172|ref|NP_001158067.1|	PDZ domain-containing RING finger protein 4 isoform 1 [Homo sapiens]
SmVG_025141	7.67775	6.09376	4.34836	6.23402	1.61276	1.23679	0.885207	0.551276	-2.50644	5e-05	0.000181778	4.97563	6.44447	4.13537	5.20638	0.663911	0.575997	0.278948	0.271327	-2.12677	3.77323e-08	2.51842e-07	4.04101	4.74186	3.82048	4.18299	0.633871	0.463109	0.24143	0.536668	-2.56413	1.37104e-18	1.81611e-17
SmVG_019041	3.9925	1.7691	1.34431	2.59558	0.18527	0.59397	0.495799	0.434305	-2.50476	0.00045	0.00138362	1.97885	3.80956	1.83733	2.44967	0.201813	0.498562	0.31401	0.304938	-1.67106	1.95783e-05	8.30948e-05	1.65015	3.18481	1.28312	1.89187	0.15589	0.389449	0.204152	0.178964	-2.51805	1.81976e-09	1.01299e-08
Smp_098340	23.3563	29.3844	26.8888	28.2634	2.52967	6.89439	3.98442	5.60799	-2.50428	5e-05	0.000181778	27.7236	24.5867	28.45	26.5283	1.51556	3.53267	4.39278	4.29373	-1.82859	1.66059e-16	2.73869e-15	17.7427	15.05	17.3635	15.956	0.794364	2.07952	2.5226	2.53366	-2.52508	1.01964e-29	2.80431e-28	GO:0003839,GO:0006750	gamma glutamylcyclotransferase;note=predicted by EVM2;note=pfam_scan%3BPfam:PF13772.1%3B%3BE()%3D1.3E-25%3Bscore%3D89.1%3Bque ry 60-142%3Bdescription%3DAIG2_2;note=iprscan%3BSuperfamily:SSF110857%3B%3Bscore%3D1.7E-12%3Bquery 1-130%3Bdescription%3Dnull;note=iprscan%3BInterPro:IPR017939 : Gamma-glutamylcyclotransferase%3BPANTHER:PTHR12935%3B%3Bscore%3D7 .4E-35%3Bquery 1-172%3Bdescription%3DGamma-gl…	Putative uncharacterized protein [Source:UniProtKB/TrEMBL;Acc:G4VNF4]	_	_
SmVG_008690	25.0972	17.6746	12.8004	24.0568	4.59735	2.87798	4.69315	2.07648	-2.48284	5e-05	0.000181778	66.9616	105.232	50.9413	74.605	15.4348	17.0203	9.7965	8.35343	-1.48483	1.86068e-09	1.47345e-08	45.2176	69.5632	32.8148	48.7403	7.84477	10.1722	5.15052	4.83494	-2.19156	5.02231e-15	4.96923e-14	GO:0006812,GO:0016021,GO:0016887
SmVG_019735:Smp_068700	5.67292	3.74912	4.14911	4.44052	0.573848	0.82077	0.830066	1.01536	-2.47485	5e-05	0.000181778	4.24985	6.75717	5.15109	5.06888	0.359146	0.812825	0.48711	0.896868	-1.89616	4.7306e-28	1.7716e-26	2.54665	3.88048	2.93137	2.76069	0.208497	0.443338	0.278526	0.472842	-2.57131	7.77964e-35	2.8368e-33		endothelin converting enzyme 2;Smp_068700	Putative uncharacterized protein [Source:UniProtKB/TrEMBL;Acc:G4LWR4]	_	_
SmVG_019735:Smp_159370	5.67292	3.74912	4.14911	4.44052	0.573848	0.82077	0.830066	1.01536	-2.47485	5e-05	0.000181778	4.24985	6.75717	5.15109	5.06888	0.359146	0.812825	0.48711	0.896868	-1.89616	4.7306e-28	1.7716e-26	2.54665	3.88048	2.93137	2.76069	0.208497	0.443338	0.278526	0.472842	-2.57131	7.77964e-35	2.8368e-33		endothelin converting enzyme 1;Smp_159370	Family M13 unassigned peptidase (M13 family) [Source:UniProtKB/TrEMBL;Acc:G4LWR3]	gi|116256333|ref|NP_009220.2|	neprilysin [Homo sapiens]
Smp_127240	2.96974	4.73976	4.61288	4.01232	0.193935	0.933874	0.793737	1.02157	-2.47252	5e-05	0.000181778	6.14741	4.41041	6.44605	5.38127	0.259179	0.982597	0.760922	1.3314	-1.74735	5.50572e-09	4.11626e-08	3.90752	2.6982	3.91512	3.19892	0.133942	0.561223	0.429748	0.744201	-2.36411	1.12538e-17	1.38342e-16	GO:0003677,GO:0003700,GO:0005634,GO:0006355,GO:0043565	homeobox protein SIX1;Smp_127240	Homeobox protein six-related [Source:UniProtKB/TrEMBL;Acc:G4LYP5]	gi|219275578|ref|NP_058628.3|	homeobox protein SIX2 [Homo sapiens]
Smp_016780	263.35	233.739	239.419	249.16	34.9349	61.5153	40.1968	41.6954	-2.46645	5e-05	0.000181778	271.592	323.633	296.213	282.061	27.1763	40.7218	48.2268	40.4344	-1.76013	5.83617e-49	5.79899e-47	159.508	183.248	165.271	155.145	12.7608	21.9435	24.4962	20.6647	-2.48261	7.8703e-57	6.54917e-55	GO:0000166,GO:0003924,GO:0005200,GO:0005525,GO:0005737,GO:0005856,GO:0005874,GO:0006184,GO:0007017,GO:0043234,GO:0051258	alpha tubulin;Smp_016780	Putative tubulin alpha chain [Source:UniProtKB/TrEMBL;Acc:G4VKY4]	gi|13376181|ref|NP_079079.1|	tubulin alpha chain-like 3 isoform 1 [Homo sapiens]
Smp_146050	15.2759	15.4224	13.459	13.5471	2.196	3.06338	2.00188	3.20127	-2.46345	5e-05	0.000181778	19.7237	21.6556	19.0817	18.7195	1.9767	2.1428	2.44573	3.08859	-1.84963	3.30184e-67	6.16393e-65	12.7555	13.2468	11.4616	11.2514	1.01737	1.31653	1.41244	1.7724	-2.59674	6.7879e-65	8.26088e-63		hypothetical protein;note=predicted by EVM2;Smp_146050
Smp_131050	10.58	11.0522	9.94299	10.7248	1.40632	2.37098	2.05162	1.84364	-2.46288	5e-05	0.000181778	11.0356	11.1967	10.8602	10.4116	1.02145	1.73366	1.87473	1.78824	-1.67095	1.10247e-40	8.03758e-39	8.02975	8.06897	7.92649	7.54405	0.897961	1.6012	1.41253	1.72111	-1.96886	7.19342e-42	3.46709e-40	GO:0000166,GO:0001932,GO:0005952,GO:0008603,GO:0016301,GO:0016310,GO:0030552,GO:0045859	cAMP dependent protein kinase R2;Smp_131050	Putative camp-dependent protein kinase type II regulatory subunit [Source:UniProtKB/TrEMBL;Acc:G4VHF4]	gi|258613969|ref|NP_001158230.1|	cAMP-dependent protein kinase type I-beta regulatory subunit [Homo sapiens]
Smp_128940	17.1433	24.44	17.6162	21.1525	2.87857	4.19783	2.66344	4.90212	-2.45622	5e-05	0.000181778	26.8736	20.5483	21.3493	23.1494	2.05468	2.63199	2.96364	4.52329	-1.79441	8.38863e-31	3.70453e-29	16.6735	12.2129	12.5358	13.4773	1.02184	1.5	1.61813	2.47884	-2.53467	1.26348e-37	5.10425e-36	GO:0004871,GO:0004930,GO:0005886,GO:0005887,GO:0007165,GO:0007186,GO:0007196,GO:0008066,GO:0016020,GO:0016021,GO:0042734,GO:0051966	metabotropic glutamate receptor;Smp_128940	Putative metabotropic glutamate receptor [Source:UniProtKB/TrEMBL;Acc:G4V9E9]	gi|4504141|ref|NP_000832.1|	metabotropic glutamate receptor 4 precursor [Homo sapiens]
SmVG_001318	4.89949	2.88307	2.05537	3.09704	0.585422	0.281963	1.15932	0.341349	-2.4495	5e-05	0.000181778	3.00088	4.76464	2.52353	2.97124	0.409294	1.1042	0.43861	0.665784	-1.3948	1.76693e-10	1.60312e-09	2.08478	3.06357	1.69647	1.90098	0.208967	0.657464	0.395292	0.37307	-1.87509	2.11708e-12	1.64107e-11
SmVG_035106	5.75881	1.04981	1.19362	1.05806	0	0.250095	0.258741	1.15054	-2.44892	0.0025	0.00647869	2.87214	12.7833	2.66026	3.89626	0.751543	0.868562	0.786546	2.30046	-1.12203	0.00756565	0.0179262	1.8233	7.70851	1.61278	2.33838	0.386287	0.568801	0.440199	1.29038	-1.76123	0.00206413	0.00444511
SmVG_023697	4.0795	1.76645	1.88912	2.93622	0.784481	0	0.684526	0.500779	-2.43762	0.00015	0.000507999	1.68769	4.42109	1.92619	2.97829	0.499048	0.576988	0.105639	0.408907	-1.65164	3.21283e-05	0.000130472	1.36192	2.97047	1.36736	1.90852	0.264915	0.469115	0.120391	0.230528	-2.20328	6.1738e-08	2.85008e-07
Smp_129530	7.5055	4.13809	2.97256	4.3434	1.0525	0.229005	1.40193	0.837264	-2.42899	5e-05	0.000181778	5.08469	9.79056	4.29154	5.58838	0.880181	1.7645	0.315749	0.873297	-1.70515	2.36113e-06	1.18162e-05	3.39568	6.31325	2.68893	3.58842	0.459062	1.07849	0.182015	0.49881	-2.34725	3.0389e-10	1.86432e-09	GO:0005509,GO:0005886,GO:0007155,GO:0007156,GO:0016020,GO:0016021	protocadherin gamma A5;Smp_129530	Putative cadherin [Source:UniProtKB/TrEMBL;Acc:G4VEK8]	gi|11056024|ref|NP_061741.1|	protocadherin gamma-A5 isoform 1 precursor [Homo sapiens]
Smp_159600	4.96858	3.67804	4.25374	4.30151	0.644383	0.923906	0.72747	0.901143	-2.42782	5e-05	0.000181778	5.12791	6.98493	5.9951	5.75904	0.683413	0.897376	0.880263	0.920803	-1.69164	1.04158e-57	1.36525e-55	2.85315	3.82784	3.18636	3.1101	0.295801	0.471871	0.428624	0.496519	-2.39151	1.12431e-52	8.2303e-51	GO:0005201,GO:0005578,GO:0005581	collagen alpha 1(IV) chain;Smp_159600	Putative collagen alpha chain [Source:UniProtKB/TrEMBL;Acc:G4V697]	gi|116256356|ref|NP_000083.3|	collagen alpha-4(IV) chain precursor [Homo sapiens]
Smp_127370	25.8592	38.4093	25.3205	25.5606	3.6037	6.37602	5.93484	5.50606	-2.42644	5e-05	0.000181778	34.0411	24.597	25.6579	22.8392	2.10435	4.70344	3.84064	4.39794	-1.7309	1.19989e-26	4.0283e-25	21.2355	14.8427	15.1758	13.3471	1.05564	2.69202	2.0633	2.40379	-2.44666	2.77571e-36	1.05564e-34	GO:0003829,GO:0008109,GO:0008375,GO:0016020,GO:0016021,GO:0016740,GO:0016757	glycosyltransferase 14 family member;Smp_127370	Glycosyltransferase 14 family member, putative [Source:UniProtKB/TrEMBL;Acc:G4LUI0]	gi|4503963|ref|NP_001482.1|	N-acetyllactosaminide beta-1,6-N-acetylglucosaminyl-transferase isoform B [Homo sapiens]
Smp_105420	4255.75	6344.97	3655.82	4437.04	615.394	1222.68	716.922	946.95	-2.41631	5e-05	0.000181778	6485.39	4659.12	4112.49	4530.35	433.993	657.444	849.252	843.089	-1.69737	1.5901e-19	3.41318e-18	4139.81	2845.78	2483.95	2703.6	227.086	385.742	488.08	481.528	-2.39532	8.01639e-25	1.64311e-23	GO:0001664,GO:0005737,GO:0006629,GO:0008047,GO:0043085	Saposin%2CIPR008139 Saposin;Smp_105420	Saposin containing protein [Source:UniProtKB/TrEMBL;Acc:G4VC43]	_	_
Smp_028370	2.7448	2.33709	2.51722	2.93665	0.353241	0.758091	0.580553	0.286269	-2.41307	0.00015	0.000507999	2.43571	3.15493	3.18392	3.25102	0.236698	0.513302	0.498771	0.484069	-1.60993	2.248e-05	9.43378e-05	1.53597	1.90247	2.0779	1.92029	0.120941	0.297435	0.279099	0.270505	-2.36721	6.23668e-11	4.12502e-10		tctex1 domain containing protein 1;Smp_028370	Dynein light chain 3' [Source:UniProtKB/TrEMBL;Acc:G4LWZ3]	gi|239735600|ref|NP_689878.2|	tctex1 domain-containing protein 1 [Homo sapiens]
Smp_050390	1692.1	1789.4	1274.73	1538.51	379.099	239.609	325.345	238.921	-2.41173	5e-05	0.000181778	2096.12	2087.98	1585.49	1755.38	304.606	332.036	190.095	233.533	-1.70612	2.51648e-28	9.59924e-27	1212.17	1157.19	869.218	951	140.192	175.248	95.0648	118.184	-2.40981	1.90942e-37	7.61889e-36	GO:0004029,GO:0004030,GO:0008152,GO:0016491,GO:0016620,GO:0055114	aldehyde dehydrogenase;Smp_050390	Aldehyde dehydrogenase,putative [Source:UniProtKB/TrEMBL;Acc:G4LWI3]	gi|238814322|ref|NP_001029345.2|	aldehyde dehydrogenase family 1 member L2, mitochondrial precursor [Homo sapiens]
SmVG_012231	2.87914	3.19484	2.20925	2.85234	0.19402	0.988821	0.310411	0.61045	-2.40417	0.00015	0.000507999	3.6068	3.91916	2.52246	3.09762	0.119995	0.433713	0.631877	0.684746	-1.72968	9.66539e-06	4.37017e-05	2.43099	2.45881	2.20287	1.96267	0.221663	0.488267	0.323102	0.93869	-1.61372	2.35945e-07	9.99635e-07
SmVG_025265:Smp_024290	7.24849	6.81872	5.96151	5.84997	0.97077	1.34689	1.50876	1.08309	-2.39811	5e-05	0.000181778	6.99546	7.91358	6.88899	6.14616	0.681837	1.46181	0.946549	0.964586	-1.69652	1.63071e-40	1.17497e-38	4.38208	4.82001	4.12023	3.67865	0.37066	0.860232	0.51964	0.539183	-2.3665	8.56119e-44	4.45731e-42		map kinase kinase protein ddmek1;Smp_024290	Putative map kinase kinase protein DdMEK1 [Source:UniProtKB/TrEMBL;Acc:G4VQ82]	_	_
SmVG_025265:Smp_135340	7.24849	6.81872	5.96151	5.84997	0.97077	1.34689	1.50876	1.08309	-2.39811	5e-05	0.000181778	6.99546	7.91358	6.88899	6.14616	0.681837	1.46181	0.946549	0.964586	-1.69652	1.63071e-40	1.17497e-38	4.38208	4.82001	4.12023	3.67865	0.37066	0.860232	0.51964	0.539183	-2.3665	8.56119e-44	4.45731e-42		discoidin domain receptor;Smp_135340	Putative discoidin domain receptor [Source:UniProtKB/TrEMBL;Acc:G4VQ83]	gi|83977452|ref|NP_054700.2|	epithelial discoidin domain-containing receptor 1 isoform 3 precursor [Homo sapiens]
Smp_200240	265.539	336.578	223.687	273.294	47.1739	56.2147	54.6952	51.0094	-2.3941	5e-05	0.000181778	407.947	333.153	304.401	332.47	41.7304	59.8222	51.375	56.4241	-1.60667	5.47894e-66	9.50789e-64	262.602	205.443	186.505	203.214	22.393	35.8436	30.5847	33.0346	-2.30005	1.87174e-68	2.6799e-66	GO:0006950	universal stress protein;note=iprscan%3BInterPro:IPR006016 : UspA%3BPfam:PF00582%3B%3Bscore%3D1.8E-10%3Bquery 16-164%3Bdescription%3DUspA;note=iprscan%3BInterPro:IPR006015 : Universal stress protein (Usp)%3BPRINTS:PR01438%3B%3Bscore%3D1.5E-15%3Bquery 124-136%3Bdescription%3DUniversal stress protein A;note=iprscan%3BInterPro:IPR006015 : Universal stress protein (Usp)%3BPRINTS:PR01438%3B%3Bscore%3D…	Putative uncharacterized protein Smp_200240 [Source:UniProtKB/TrEMBL;Acc:G4V5S1]	_	_
Smp_151590	7.9404	10.633	8.83109	9.79282	1.48229	2.22792	1.46405	1.9254	-2.38938	5e-05	0.000181778	16.7548	13.6187	15.3369	15.1195	1.51281	2.17537	2.27548	2.54295	-1.72253	3.41342e-69	7.12826e-67	10.1286	7.9525	8.84201	8.65896	0.726627	1.24307	1.1913	1.35269	-2.43797	5.28935e-71	8.58284e-69		Centrosomal protein of 135 kDa (Cep135 protein);Smp_151590	Putative centrosomal protein of 135 kDa (Cep135 protein) (Centrosomal protein 4) [Source:UniProtKB/TrEMBL;Acc:G4V5N5]	_	_
Smp_130070	6.89836	6.73525	6.43864	8.05926	1.43758	1.29657	1.32371	1.31458	-2.38854	5e-05	0.000181778	7.68542	8.10969	8.00334	9.21754	1.08393	1.35265	0.997598	1.34535	-1.67562	7.78792e-58	1.03177e-55	4.69425	4.84043	4.69344	5.30862	0.552069	0.774621	0.527715	0.702689	-2.40277	1.7579e-62	1.94487e-60	GO:0005515,GO:0016020,GO:0016021	nephrin;Smp_130070	Putative nephrin [Source:UniProtKB/TrEMBL;Acc:G4VBT7]	gi|4758822|ref|NP_004637.1|	nephrin precursor [Homo sapiens]
Smp_039810	14.2297	10.216	7.70747	9.75734	2.45184	1.68812	2.29763	1.57351	-2.38724	5e-05	0.000181778	11.9551	18.0882	10.2683	11.7566	1.96775	2.53164	1.38944	1.63721	-1.67558	2.06763e-21	5.1674e-20	7.57695	11.0981	6.1595	7.05801	1.03408	1.46975	0.804095	0.918576	-2.38271	1.52548e-31	4.56987e-30	GO:0003676,GO:0008270,GO:0046872	muscleblind protein;Smp_039810	Muscleblind-like protein [Source:UniProtKB/TrEMBL;Acc:G4VSJ1]	_	_
Smp_126230	11.7572	10.587	8.48066	8.63862	2.38837	1.71383	1.8322	1.68352	-2.37305	5e-05	0.000181778	8.07165	10.0988	7.90791	6.79152	1.26146	1.36636	0.741017	1.16659	-1.70903	2.70988e-21	6.66437e-20	5.81521	6.65023	5.18756	4.70789	0.839911	1.14905	0.60927	0.868889	-2.14227	1.43195e-26	3.22719e-25		hypothetical protein;Smp_126230	Putative uncharacterized protein [Source:UniProtKB/TrEMBL;Acc:G4M019]	_	_
Smp_123550	36.6576	28.5707	22.4562	20.1274	5.60639	4.77831	7.61755	2.89647	-2.36703	0.0074	0.0168973	32.7499	46.9455	32.7358	27.3185	4.36586	8.1557	4.56894	3.68595	-1.63952	3.23837e-18	6.24413e-17	19.4718	27.0798	18.8981	15.1939	2.02102	4.3821	2.32642	1.83479	-2.29385	2.12836e-22	3.63538e-21	GO:0005576	venom allergen (val) protein;Smp_123550	Venom allergen-like (VAL) 8 protein [Source:UniProtKB/TrEMBL;Acc:G4VG30]	gi|22748923|ref|NP_689649.1|	GLIPR1-like protein 2 [Homo sapiens]
Smp_172600	6.31441	5.09372	4.40501	4.65574	0.871416	0.621711	1.57553	0.900173	-2.36665	5e-05	0.000181778	5.28103	6.88692	4.97711	5.15824	0.684436	1.51649	0.376761	0.836526	-1.71923	7.68977e-12	8.11179e-11	3.21921	4.10333	2.9147	2.91565	0.42476	0.86405	0.237489	0.503683	-2.16996	3.34432e-19	4.64484e-18	GO:0007267,GO:0007275	hedgehog;Smp_172600	Putative sonic hedgehog [Source:UniProtKB/TrEMBL;Acc:G4VHZ0]	_	_
SmVG_018673	10.067	10.4025	11.2075	10.1838	1.48371	2.3505	2.58589	1.70974	-2.3643	0.0002	0.000662986	23.111	23.7118	25.8724	23.1643	2.20257	4.18295	3.71785	3.46494	-1.71607	4.68248e-61	7.03572e-59	15.3704	15.0423	16.9687	15.112	1.23021	2.57247	2.14382	2.08408	-2.41024	2.56836e-73	4.38695e-71	GO:0016021,GO:0019835
Smp_124040	3.67724	3.43221	4.09065	3.20869	0.758363	0.70077	0.696751	0.644755	-2.36312	5e-05	0.000181778	4.12273	4.57179	5.00224	3.86021	0.502526	0.724131	0.471527	0.604058	-1.7784	1.12895e-62	1.80646e-60	2.62778	2.84688	3.13946	2.32028	0.286399	0.462172	0.303067	0.411596	-2.36321	2.17833e-68	2.98707e-66	GO:0005272,GO:0006810,GO:0006811,GO:0006814,GO:0016020,GO:0016021,GO:0035725	FMRFamide activated amiloride sensitive sodium;Smp_124040	Putative uncharacterized protein [Source:UniProtKB/TrEMBL;Acc:G4V6N4]	_	_
SmVG_031722:Smp_102780	5.67982	6.60998	6.19642	5.75199	0.682147	1.61431	0.926714	1.49722	-2.3603	5e-05	0.000181778	12.0033	9.56198	10.2722	9.52602	0.861926	1.46957	1.51682	1.975	-1.73734	3.12576e-33	1.55292e-31	8.2831	6.49377	6.88729	6.33973	0.479633	0.986134	0.999099	1.29569	-2.38223	2.31456e-37	9.12331e-36		N methyl D aspartate receptor associated;Smp_102780	N-methyl-D-aspartate receptor-associated protein, putative [Source:UniProtKB/TrEMBL;Acc:G4LZR6]	_	_
SmVG_031722:Smp_204810	5.67982	6.60998	6.19642	5.75199	0.682147	1.61431	0.926714	1.49722	-2.3603	5e-05	0.000181778	12.0033	9.56198	10.2722	9.52602	0.861926	1.46957	1.51682	1.975	-1.73734	3.12576e-33	1.55292e-31	8.2831	6.49377	6.88729	6.33973	0.479633	0.986134	0.999099	1.29569	-2.38223	2.31456e-37	9.12331e-36		hypothetical protein;note=tmhmm%3B%3Bquery 1-168%3B;Smp_204810	Putative uncharacterized protein Smp_204810 [Source:UniProtKB/TrEMBL;Acc:G4LZR7]	_	_
SmVG_002030	1.86485	1.28394	0.775165	0.901988	0.430603	0.278339	0.0947956	0.139439	-2.35521	0.00045	0.00138362	1.37133	2.09336	1.37572	1.44004	0.352963	0.32935	0.216993	0.259222	-1.37502	7.66538e-06	3.52276e-05	1.3924	2.00204	1.42027	1.25126	0.18684	0.343535	0.118527	0.205319	-2.21817	2.18027e-14	2.0197e-13
Smp_024010	2.40043	4.11004	4.67757	2.66637	0.34108	1.37713	0.732329	0.277244	-2.34455	0.00155	0.00422796	4.79351	2.66197	6.35075	2.75545	0.233525	0.678485	0.966968	0.238137	-1.70852	0.000413505	0.00133337	3.02175	1.60101	3.80293	1.63773	0.122111	0.394204	0.557285	0.135924	-2.45798	1.73191e-06	6.39435e-06	GO:0016020,GO:0016021	microsomal glutathione S transferase 1;Smp_024010	Microsomal GST-1 [Source:UniProtKB/TrEMBL;Acc:G4VQ47]	gi|9945306|ref|NP_064696.1|	microsomal glutathione S-transferase 1 [Homo sapiens]
Smp_181070	99.0393	143.754	95.7054	110.216	14.4086	34.0201	16.2678	24.0207	-2.33851	5e-05	0.000181778	289.647	212.544	216.564	227.15	21.2336	27.6391	48.3162	42.9022	-1.68911	8.6583e-16	1.34019e-14	181.722	127.849	129.2	134.203	11.0701	16.0427	27.2455	24.1023	-2.33268	1.81681e-20	2.75521e-19		hypothetical protein;Smp_181070	Putative uncharacterized protein [Source:UniProtKB/TrEMBL;Acc:G4VC40]	_	_
Smp_124240	206.821	204.432	204.793	214.365	42.5592	40.1666	44.333	37.5573	-2.33472	5e-05	0.000181778	241.084	260.633	264.791	253.496	32.5819	46.631	32.377	37.2714	-1.66759	6.0615e-148	1.49367e-144	148.074	153.902	153.882	146.376	16.1693	26.4348	17.4623	20.1589	-2.37266	1.4875e-138	1.81029e-135	GO:0005890,GO:0006813,GO:0006814,GO:0016020,GO:0016021	sodium:potassium dependent atpase beta subunit;Smp_124240	Putative sodium/potassium-dependent atpase beta subunit; Sodium/potassium ATPase1 beta subunit [Source:UniProtKB/TrEMBL;Acc:C4PY08]	gi|4502277|ref|NP_001668.1|	sodium/potassium-transporting ATPase subunit beta-1 [Homo sapiens]
Smp_121930	22.6464	32.4761	22.6561	26.6355	3.98024	6.50528	3.97214	6.43541	-2.32122	5e-05	0.000181778	49.0802	37.3466	39.6993	39.6453	3.75468	6.20742	6.60355	9.04219	-1.64331	9.98139e-25	3.00686e-23	30.2747	22.3694	23.4646	23.421	1.92358	3.57969	3.56628	4.92813	-2.30389	1.75582e-35	6.49987e-34	GO:0016020,GO:0016021	hypothetical protein;Smp_121930	Putative uncharacterized protein [Source:UniProtKB/TrEMBL;Acc:G4VGD0]	_	_
Smp_165210	10.3678	11.7977	9.85691	11.4559	2.20471	1.82029	2.37606	2.3002	-2.321	5e-05	0.000181778	13.7055	12.6001	12.3658	12.6781	1.86353	2.46857	1.60516	2.34034	-1.57916	7.15692e-98	3.26594e-95	8.25558	7.38867	7.11866	7.25805	0.927277	1.46106	0.85934	1.34107	-2.17031	3.24304e-83	6.71793e-81	GO:0004672,GO:0004674,GO:0005524,GO:0005634,GO:0006468,GO:0016301,GO:0016310,GO:0016772	serine:threonine protein kinase 17A;Smp_165210	Serine/threonine kinase [Source:UniProtKB/TrEMBL;Acc:G4M1I2]	gi|109255245|ref|NP_004751.2|	serine/threonine-protein kinase 17A [Homo sapiens]
Smp_166300	63.2859	62.8137	61.0252	54.04	13.0529	12.5097	12.3884	10.4375	-2.31728	5e-05	0.000181778	73.9412	83.1273	76.1778	66.1981	9.59237	13.1709	9.19661	10.4905	-1.6908	1.35731e-104	8.36169e-102	46.4657	50.4038	45.1621	38.6702	4.80872	7.57802	4.90276	5.57564	-2.40355	7.65161e-113	4.13867e-110	GO:0016020,GO:0016021	hypothetical protein;Smp_166300	Putative uncharacterized protein [Source:UniProtKB/TrEMBL;Acc:G4VD09]	_	_
Smp_151310	4.4455	4.16049	3.24754	4.02368	0.999665	0.552961	0.889051	0.78295	-2.29975	5e-05	0.000181778	4.98454	5.60735	4.26238	4.62007	0.688902	0.944461	0.520228	0.710411	-1.66244	2.25873e-30	9.5965e-29	3.07281	3.31686	2.47841	2.67333	0.353099	0.532485	0.283542	0.383184	-2.34409	1.32286e-35	4.9158e-34	GO:0005515,GO:0005576	netrin;Smp_151310	Putative netrin [Source:UniProtKB/TrEMBL;Acc:G4VQH8]	gi|5453810|ref|NP_006172.1|	netrin-3 precursor [Homo sapiens]
SmVG_030892	63.2658	69.5328	51.8346	63.906	12.563	11.7408	13.3416	12.9427	-2.2966	5e-05	0.000181778	65.4964	63.0626	54.167	59.6632	8.18989	11.2309	7.58839	10.5694	-1.60565	3.7979e-85	1.19984e-82	43.8423	41.0374	34.8238	38.3813	4.60687	7.12989	4.40112	6.19037	-2.2965	8.02323e-82	1.59417e-79
Smp_129810	3.04626	2.57706	3.20002	2.03998	0.426935	0.472111	0.761895	0.553984	-2.29413	5e-05	0.000181778	2.97547	3.17163	3.67757	2.2255	0.47059	0.876916	0.598283	0.769794	-1.22634	5.88761e-11	5.64085e-10	1.83261	2.1052	2.24347	1.4783	0.291861	0.64678	0.307074	0.411468	-1.66096	3.57998e-15	3.58587e-14	GO:0004930,GO:0007186,GO:0016020,GO:0016021	hypothetical protein;Smp_129810	Putative rhodopsin-like orphan GPCR [Source:UniProtKB/TrEMBL;Acc:G4VS40]	_	_
SmVG_024528:Smp_116270	2.50875	1.44888	1.65245	1.62709	0.321105	0.428542	0.344924	0.383053	-2.29215	0.0095	0.0210775	1.64919	3.05527	2.09923	2.04193	0.297768	0.464944	0.429242	0.482405	-1.37694	2.54125e-11	2.52914e-10	1.26842	2.00443	1.40599	1.40374	0.174673	0.275167	0.24677	0.278686	-2.09032	4.43228e-19	6.07784e-18		hypothetical protein;Smp_116270	Putative uncharacterized protein [Source:UniProtKB/TrEMBL;Acc:G4VPL0]	_	_
SmVG_024528:Smp_139040	2.50875	1.44888	1.65245	1.62709	0.321105	0.428542	0.344924	0.383053	-2.29215	0.0095	0.0210775	1.64919	3.05527	2.09923	2.04193	0.297768	0.464944	0.429242	0.482405	-1.37694	2.54125e-11	2.52914e-10	1.26842	2.00443	1.40599	1.40374	0.174673	0.275167	0.24677	0.278686	-2.09032	4.43228e-19	6.07784e-18		GTP binding protein GEM;Smp_139040	Putative uncharacterized protein [Source:UniProtKB/TrEMBL;Acc:G4VPK8]	_	_
SmVG_024528:Smp_139050	2.50875	1.44888	1.65245	1.62709	0.321105	0.428542	0.344924	0.383053	-2.29215	0.0095	0.0210775	1.64919	3.05527	2.09923	2.04193	0.297768	0.464944	0.429242	0.482405	-1.37694	2.54125e-11	2.52914e-10	1.26842	2.00443	1.40599	1.40374	0.174673	0.275167	0.24677	0.278686	-2.09032	4.43228e-19	6.07784e-18		GTP binding protein GEM;Smp_139050	Putative uncharacterized protein [Source:UniProtKB/TrEMBL;Acc:G4VPL1]	_	_
Smp_024180	59.7734	95.1935	58.871	63.4385	12.2566	19.6312	11.3618	14.0579	-2.27453	5e-05	0.000181778	218.211	153.175	163.789	157	20.8761	24.7396	32.6718	32.3711	-1.57055	8.69987e-27	2.94481e-25	136.88	92.2542	97.48	92.3232	10.5444	14.2617	17.5987	17.856	-2.23729	6.47146e-34	2.23426e-32	GO:0016020,GO:0016021	placenta specific gene 8 protein;Smp_024180	Putative placenta-specificprotein 8 protein (C15 protein) [Source:UniProtKB/TrEMBL;Acc:G4VQ68]	_	_
Smp_163610	52.5675	71.239	60.0387	65.5308	11.9099	16.5163	9.98923	13.2266	-2.2717	5e-05	0.000181778	189.42	159.239	183.891	182.016	18.1659	22.4741	23.3992	26.8394	-1.79981	3.69641e-109	3.03623e-106	114.719	92.6251	105.055	103.08	8.86367	12.5174	12.1836	14.3075	-2.55646	7.82821e-94	2.24163e-91	GO:0004364,GO:0005515,GO:0016740	GST class mu%3B SM26:2 antigen%3B glutathione;Smp_163610	Glutathione S-transferase class-mu 26 kDa isozyme [Source:UniProtKB/Swiss-Prot;Acc:P15964]	gi|4504179|ref|NP_000841.1|	glutathione S-transferase Mu 4 isoform 1 [Homo sapiens]
Smp_162500	2.95063	2.99674	3.98471	3.66786	0.885734	0.621114	0.784409	0.54058	-2.26379	0.0001	0.000349068	4.70609	4.60051	6.38168	5.78166	1.16812	1.23424	0.911591	1.0088	-1.33466	8.23734e-28	3.03005e-26	2.97648	2.75024	3.84157	3.45146	0.606696	0.72406	0.537593	0.564704	-1.86408	6.22983e-24	1.20281e-22	GO:0016020,GO:0016021,GO:0055085	drug efflux protein;Smp_162500	Drug efflux protein-related [Source:UniProtKB/TrEMBL;Acc:G4VNP5]	_	_
Smp_073280	28.5895	26.2933	21.1619	24.5275	5.13337	4.96714	6.1932	4.67842	-2.26169	5e-05	0.000181778	24.6737	27.9915	22.9887	23.3962	3.36475	5.15685	3.40765	4.341	-1.55779	1.85209e-90	7.13114e-88	15.3666	16.6816	13.6917	13.7354	1.71019	2.95536	1.88024	2.42068	-2.20076	5.89421e-92	1.59406e-89	GO:0016020,GO:0016021	hypothetical protein;Smp_073280	Putative uncharacterized protein [Source:UniProtKB/TrEMBL;Acc:G4VA88]	_	_
Smp_149390	11.1291	10.0009	9.63613	11.8719	2.0889	2.11675	2.4267	2.26505	-2.26069	5e-05	0.000181778	10.6301	12.8775	11.4187	12.5902	1.52059	2.33058	1.55678	2.15943	-1.59267	1.16834e-101	6.25873e-99	6.60779	7.70036	6.73449	7.3649	0.773783	1.34256	0.871823	1.211	-2.24422	2.77827e-88	6.93571e-86	GO:0007154,GO:0016021,GO:0030246	fras1 related extracellular matrix protein;Smp_149390	Fras1 related extracellular matrix protein [Source:UniProtKB/TrEMBL;Acc:G4VMJ6]	_	_
SmVG_034014	6.31569	8.45333	6.493	6.90837	0.927348	1.52703	1.97491	1.45196	-2.25999	5e-05	0.000181778	9.30168	6.71226	7.41651	7.33792	0.797715	1.78493	1.19971	1.76355	-1.48319	9.93468e-23	2.64374e-21	5.90137	4.24011	4.66027	4.50927	0.471847	1.10252	0.697606	0.910309	-2.06751	1.24731e-26	2.83072e-25
Smp_157050	14.4566	11.9921	10.307	11.1495	2.83196	1.9374	2.89216	2.34108	-2.2598	5e-05	0.000181778	11.2771	15.0615	11.6168	10.2852	1.95025	2.81564	1.31369	1.63372	-1.58936	1.57551e-23	4.41178e-22	7.23828	9.1711	7.02309	6.22757	1.02631	1.67421	0.749776	0.981069	-2.2067	2.86768e-28	7.12239e-27	GO:0004930,GO:0007186,GO:0016020,GO:0016021	rhodopsin orphan GPCR;Smp_157050	Rhodopsin-like orphan GPCR,putative [Source:UniProtKB/TrEMBL;Acc:G4M1V3]	_	_
SmVG_019876	1.45683	1.04344	1.47348	1.16888	0.277487	0.133135	0.276728	0.389448	-2.25576	5e-05	0.000181778	2.7369	3.49683	2.30873	2.0407	0.528131	0.893763	0.392382	0.68322	-1.2014	1.07026e-12	1.23471e-11	1.81876	2.22863	1.53448	1.33489	0.323111	0.59661	0.30967	0.57092	-1.39635	3.54558e-12	2.67803e-11
SmVG_035785	6.55258	3.94056	2.94823	3.64451	0.682908	0.241292	0.867928	1.78844	-2.25454	5e-05	0.000181778	5.30596	6.87234	5.00845	4.84783	1.41466	2.76163	0.741851	1.15577	-1.08136	8.64734e-06	3.94461e-05	4.1968	6.13829	3.53454	3.90651	0.847749	1.66973	0.449336	1.07731	-1.54852	1.14203e-07	5.08638e-07
Smp_194910	2344.59	3611.17	2140	2422.85	306.409	828.602	409.325	664.188	-2.25179	5e-05	0.000181778	3456.74	2412.73	2310.79	2347.56	199.46	352.8	542.462	558.237	-1.63828	4.48671e-11	4.37002e-10	2249.48	1503.88	1422.61	1439.05	108.364	212.867	319.971	326.186	-2.24928	7.64611e-15	7.4554e-14		Saposin B domain containing protein;Smp_194910	Putative uncharacterized protein [Source:UniProtKB/TrEMBL;Acc:G4VHH1]	_	_
SmVG_022099:Smp_127880	18.2362	19.4912	14.7399	17.0816	3.03265	3.62205	4.70743	3.26709	-2.24917	5e-05	0.000181778	26.297	24.713	21.3587	22.0072	3.23364	5.43584	2.89949	3.87541	-1.56676	3.41625e-46	3.02818e-44	16.7416	15.0403	12.8591	13.2111	1.71108	3.18006	1.65472	2.24478	-2.20053	2.09332e-42	1.01396e-40		hypothetical protein;note=pfam_scan%3BPfam:PF08557.5%3B%3BE()%3D4.8E-5%3Bscore%3D22.3%3Bquer y 23-36%3Bdescription%3DLipid_DES;Smp_127880
SmVG_022099:Smp_145900	18.2362	19.4912	14.7399	17.0816	3.03265	3.62205	4.70743	3.26709	-2.24917	5e-05	0.000181778	26.297	24.713	21.3587	22.0072	3.23364	5.43584	2.89949	3.87541	-1.56676	3.41625e-46	3.02818e-44	16.7416	15.0403	12.8591	13.2111	1.71108	3.18006	1.65472	2.24478	-2.20053	2.09332e-42	1.01396e-40		sphingolipid delta(4) desaturase:C4 hydroxylase;Smp_145900
SmVG_030160:Smp_166530	49.8169	64.1405	51.1591	61.0938	10.0752	15.0481	9.32372	13.618	-2.23461	5e-05	0.000181778	82.5467	69.9081	76.2595	76.7804	7.96616	9.59994	11.6485	14.7273	-1.70061	8.88459e-43	6.9283e-41	50.4854	41.0181	44.3252	44.1544	3.98837	5.47001	6.19338	8.04329	-2.38748	8.44056e-51	5.6505e-49		phospholipase A;Smp_166530	Phosphatidylcholine-sterol acyltransferase (Lecithin-cholesterol acyltransferase)/ Phospholipase A [Source:UniProtKB/TrEMBL;Acc:C4QJA6]	gi|4557892|ref|NP_000220.1|	phosphatidylcholine-sterol acyltransferase precursor [Homo sapiens]
SmVG_030160:Smp_166530.2	49.8169	64.1405	51.1591	61.0938	10.0752	15.0481	9.32372	13.618	-2.23461	5e-05	0.000181778	82.5467	69.9081	76.2595	76.7804	7.96616	9.59994	11.6485	14.7273	-1.70061	8.88459e-43	6.9283e-41	50.4854	41.0181	44.3252	44.1544	3.98837	5.47001	6.19338	8.04329	-2.38748	8.44056e-51	5.6505e-49		phospholipase A;Smp_166530.2
SmVG_030160:Smp_166540	49.8169	64.1405	51.1591	61.0938	10.0752	15.0481	9.32372	13.618	-2.23461	5e-05	0.000181778	82.5467	69.9081	76.2595	76.7804	7.96616	9.59994	11.6485	14.7273	-1.70061	8.88459e-43	6.9283e-41	50.4854	41.0181	44.3252	44.1544	3.98837	5.47001	6.19338	8.04329	-2.38748	8.44056e-51	5.6505e-49		serine:threonine protein kinase Nek11;note=pfam_scan%3BPfam:PF00069.20%3B%3BE()%3D2.0E-45%3Bscore%3D154.8%3Bq uery 33-207%3Bdescription%3DPkinase;Smp_166540	Kinase [Source:UniProtKB/TrEMBL;Acc:C4QJA8]	gi|225637560|ref|NP_079076.3|	serine/threonine-protein kinase Nek11 isoform 1 [Homo sapiens]
Smp_124760	8.6997	8.10968	6.84119	8.97073	1.78368	1.47396	2.05372	1.62772	-2.233	5e-05	0.000181778	8.72374	10.3172	8.06266	9.74746	1.26957	1.93517	1.06231	1.53117	-1.60549	1.62836e-48	1.55527e-46	5.31274	6.01152	4.68174	5.61277	0.6202	1.0913	0.575461	0.818913	-2.26443	6.79806e-45	3.63659e-43		hypothetical protein;Smp_124760	Putative uncharacterized protein [Source:UniProtKB/TrEMBL;Acc:G4M1M7]	_	_
Smp_194050	548.636	516.941	463.331	550.536	102.431	116.896	141.768	82.8368	-2.22779	5e-05	0.000181778	576.43	648.554	561.024	606.89	73.7147	138.219	86.8295	76.1424	-1.61908	3.23703e-35	1.80468e-33	359.154	388.733	332.481	355.62	36.8592	78.9936	47.32	41.4725	-2.27668	2.30825e-45	1.25548e-43		Clumping factor A;Smp_194050	Clumping factor A (Fibrinogen-binding protein A) (Fibrinogen receptor A), putative [Source:UniProtKB/TrEMBL;Acc:G4LX87]	_	_
SmVG_019873:Smp_123650	21.404	18.5506	16.6902	19.1491	4.19389	3.73334	5.04769	3.27278	-2.22185	5e-05	0.000181778	20.4233	25.9604	20.403	21.2552	3.11014	4.98398	2.80522	3.08709	-1.60089	1.42865e-40	1.03543e-38	12.6313	15.3169	11.9373	12.3761	1.57988	2.87289	1.54053	1.71121	-2.24733	2.63559e-54	2.05281e-52		peroxidasin;Smp_123650	Putative peroxidasin [Source:UniProtKB/TrEMBL;Acc:G4VLK0]	gi|332078492|ref|NP_001193674.1|	thyroid peroxidase isoform b precursor [Homo sapiens]
SmVG_019873:Smp_123660	21.404	18.5506	16.6902	19.1491	4.19389	3.73334	5.04769	3.27278	-2.22185	5e-05	0.000181778	20.4233	25.9604	20.403	21.2552	3.11014	4.98398	2.80522	3.08709	-1.60089	1.42865e-40	1.03543e-38	12.6313	15.3169	11.9373	12.3761	1.57988	2.87289	1.54053	1.71121	-2.24733	2.63559e-54	2.05281e-52		peroxidasin;note=pfam_scan%3BPfam:PF03098.10%3B%3BE()%3D1.3E-16%3Bscore%3D59.9%3Bqu ery 1380-1446%3Bdescription%3DAn_peroxidase;note=pfam_scan%3BPfam:PF13855.1%3B%3BE()%3D8.7E-10%3Bscore%3D38.1%3Bque ry 797-854%3Bdescription%3DLRR_8;note=pfam_scan%3BPfam:PF07679.11%3B%3BE()%3D1.0E-5%3Bscore%3D25.1%3Bque ry 1085-1200%3Bdescription%3DI-set;note=pfam_scan%3BPfam:PF07679.11%3B%3BE()%3D2.6E-5%3Bscore%…	Putative peroxidasin [Source:UniProtKB/TrEMBL;Acc:G4VLJ9]	gi|109150416|ref|NP_036425.1|	peroxidasin homolog precursor [Homo sapiens]
Smp_156960	123.735	77.9236	84.9017	93.5866	18.0933	12.6701	37.5718	13.1882	-2.22127	5e-05	0.000181778	124.138	217.422	149.621	151.072	18.7783	52.4015	13.524	17.6738	-1.70178	2.14452e-09	1.68727e-08	80.7198	134.548	92.05	92.6019	9.99891	31.8854	7.71072	10.4644	-2.26905	2.58272e-12	1.97684e-11	GO:0003824,GO:0008152,GO:0046872	nardilysin (M16 family);Smp_156960.2	Nardilysin (M16 family) [Source:UniProtKB/TrEMBL;Acc:G4VKA9]	_	_
Smp_143680	8.45285	6.72266	6.39301	7.80655	1.34319	1.34256	1.78813	1.82591	-2.22122	5e-05	0.000181778	8.01414	10.8194	8.3104	9.12201	1.06342	1.87317	1.07113	1.85564	-1.59348	2.79356e-40	2.00113e-38	4.8861	6.32608	4.80982	5.22427	0.52555	1.06288	0.57154	1.00284	-2.24455	4.72021e-50	3.08429e-48		laminin subunit;Smp_143680	_	gi|28559088|ref|NP_000417.2|	laminin subunit alpha-2 isoform a precursor [Homo sapiens]
Smp_126120	73.8233	94.4908	78.3155	86.5285	14.174	20.9371	16.837	19.7648	-2.2159	5e-05	0.000181778	217.843	180.501	194.874	193.801	19.624	33.3927	36.662	36.9195	-1.59415	1.44366e-33	7.38065e-32	129.158	102.742	109.848	108.03	9.33155	18.1554	18.8949	19.1344	-2.24142	6.06994e-40	2.66202e-38		LAMA protein 2;Smp_126120	Putative uncharacterized protein [Source:UniProtKB/TrEMBL;Acc:G4VB02]	gi|229093316|ref|NP_775813.2|	putative phospholipase B-like 2 isoform 1 precursor [Homo sapiens]
SmVG_008628	180.952	208.398	174.147	205.011	26.4056	56.0663	39.0301	45.3745	-2.20328	5e-05	0.000181778	250.529	216.618	252.59	212.272	18.0848	38.7428	39.3978	41.4748	-1.66915	6.07125e-23	1.64044e-21	160.44	133.533	153.123	126.799	9.38705	22.5574	22.3892	23.2139	-2.32592	5.25257e-35	1.92977e-33
Smp_016600	17.7371	15.0909	12.1058	15.1471	3.42798	2.89399	3.98929	2.79951	-2.19616	5e-05	0.000181778	41.8739	43.7276	35.315	38.2394	4.04844	6.15231	4.81061	4.78697	-1.83261	1.27856e-100	6.5638e-98	25.8117	25.8653	20.5474	22.0585	2.06397	3.49764	2.60926	2.64504	-2.57493	1.36644e-106	5.78422e-104	GO:0006810,GO:0006835,GO:0015293,GO:0016020,GO:0016021,GO:0017153,GO:0055085	solute carrier family 1;Smp_016600	Putative solute carrier family 1 (Glial high affinity glutamate transporter) [Source:UniProtKB/TrEMBL;Acc:G4VKW8]	gi|169790839|ref|NP_004163.3|	excitatory amino acid transporter 1 isoform 1 [Homo sapiens]
SmVG_029154	184.446	124.988	27.1142	68.28	34.3542	13.4729	25.694	14.9041	-2.19478	0.00155	0.00422796	123.957	192.451	29.5917	65.6848	21.794	22.0359	8.01518	12.0765	-1.43341	0.00309563	0.00817606	83.4338	123.785	18.8732	41.775	12.2115	13.7302	5.19869	7.37152	-2.24175	6.98352e-06	2.35184e-05	GO:0004869
Smp_146790	10.969	9.13826	8.01459	10.0704	2.41082	1.72565	2.51886	1.69077	-2.19411	5e-05	0.000181778	9.16809	12.7633	9.43244	10.8656	2.01537	2.49379	0.971731	1.35506	-1.60229	9.76319e-14	1.24141e-12	5.98205	7.9358	5.89291	6.71516	1.14272	1.50892	0.581355	0.788163	-2.19799	3.44277e-20	5.1252e-19	GO:0005125,GO:0005160,GO:0005576,GO:0005615,GO:0008083,GO:0010862,GO:0042981,GO:0043408,GO:0048468,GO:0060395	Bone Morphogenetic Protein (BMP) subfamily%2C fragment;Smp_146790	_	_	_
Smp_020550	17.2224	13.7837	15.9635	17.2805	3.72208	3.83834	3.62963	2.88848	-2.1902	5e-05	0.000181778	14.9602	19.4475	18.5785	18.0759	2.64431	3.6093	2.94844	2.7244	-1.52418	1.09413e-66	1.98247e-64	9.1138	11.5051	10.8424	10.579	1.31404	2.02407	1.60709	1.47304	-2.18357	2.07694e-59	1.94433e-57	GO:0005515	low density lipoprotein receptor (ldl);note=predicted by EVM2;note=pfam_scan%3BPfam:PF00057.13%3B%3BE()%3D1.8E-6%3Bscore%3D27.5%3Bque ry 457-493%3Bdescription%3DLdl_recept_a;note=pfam_scan%3BPfam:PF00057.13%3B%3BE()%3D5.5E-7%3Bscore%3D29.2%3Bque ry 372-406%3Bdescription%3DLdl_recept_a;note=pfam_scan%3BPfam:PF13895.1%3B%3BE()%3D4.3E-5%3Bscore%3D23.4%3Bquer y 87-155%3Bdescription%3DIg_2;note=pfam_s…	Low-density lipoprotein receptor (Ldl) [Source:UniProtKB/TrEMBL;Acc:G4M010]	_	_
Smp_198990	5.66821	3.7122	4.68209	3.76151	1.96955	0.40345	0.748477	0.795314	-2.18608	5e-05	0.000181778	5.16898	7.69847	5.92457	4.95037	1.51639	0.697508	0.434033	0.844864	-1.66068	4.79401e-08	3.14856e-07	3.37637	5.10402	3.7776	3.02364	0.880091	0.415434	0.340783	0.613897	-2.21973	7.04221e-11	4.63263e-10	GO:0005856	tyrosine protein phosphatase non receptor type;Smp_198990
SmVG_019986	1.36098	1.25524	2.25066	1.76506	0.482775	0	0.346709	0.638784	-2.17531	0.0013	0.00360998	2.09797	2.38585	3.1948	2.36873	0.528497	0.687492	0.446843	0.649218	-1.14641	0.00132147	0.00381845	1.31375	1.30675	1.81424	1.36983	0.277757	0.404291	0.256526	0.372087	-1.59092	3.22673e-06	1.14991e-05
Smp_128100	3.05092	3.10212	1.67573	2.94045	0.198971	0.616024	1.09077	0.496176	-2.16464	0.0002	0.000662986	2.41315	2.20458	1.89097	2.79237	0.154673	0.816825	0.336843	0.639828	-1.33692	0.00336488	0.00878362	1.81671	1.90864	1.22137	1.99933	0.0751571	0.674158	0.181496	0.430401	-1.74092	4.09912e-06	1.43764e-05	GO:0003824,GO:0004222,GO:0005739,GO:0006508,GO:0008270,GO:0016485,GO:0043171,GO:0046872,GO:0051603	insulin degrading enzyme;Smp_128100	Insulysin (M16 family) [Source:UniProtKB/TrEMBL;Acc:C4Q011]	gi|155969707|ref|NP_004960.2|	insulin-degrading enzyme isoform 1 precursor [Homo sapiens]
Smp_124980	55.8378	55.6048	49.1524	63.7948	14.7924	12.171	11.9604	11.1673	-2.16338	5e-05	0.000181778	54.3763	59.1552	54.1436	61.526	9.49942	10.5981	8.3126	9.46324	-1.52936	1.99406e-69	4.23601e-67	35.7846	36.7964	33.5621	38.3537	5.11366	6.37617	4.95345	5.78541	-2.18643	8.99316e-67	1.18321e-64	GO:0005737	Tumor necrosis factor%2C alpha induced protein;Smp_124980	Tumor necrosis factor induced protein, putative [Source:UniProtKB/TrEMBL;Acc:G4LZK5]	_	_
Smp_174530	1.68004	1.57771	2.58845	2.02116	0.247806	0.710719	0.349902	0.449224	-2.16223	5e-05	0.000181778	1.89753	2.09576	3.44254	2.50594	0.173197	0.416545	0.602615	0.476437	-1.57556	3.43016e-09	2.63157e-08	1.15757	1.22696	1.99793	1.44497	0.0859752	0.234681	0.32353	0.256992	-2.17827	1.31288e-13	1.13923e-12	GO:0003824,GO:0004177,GO:0004252,GO:0005737,GO:0005886,GO:0006508,GO:0008237,GO:0008270,GO:0042277,GO:0043171,GO:0070006	aminopeptidase PILS (M01 family);Smp_174530	Aminopeptidase PILS (M01 family) [Source:UniProtKB/TrEMBL;Acc:G4V855]	gi|158937236|ref|NP_006301.3|	puromycin-sensitive aminopeptidase [Homo sapiens]
Smp_165670	31.6622	20.075	28.4073	22.6391	4.51252	4.42846	6.38706	7.65132	-2.1612	0.0008	0.00232996	7.27903	13.9246	18.1898	14.9897	3.8984	7.24936	0	1.0264	-1.61116	0.0182789	0.0386169	18.9101	29.6592	30.8208	26.2222	3.37435	11.7933	3.04328	2.10862	-1.75231	7.08839e-07	2.78164e-06	GO:0006810,GO:0016020,GO:0016021,GO:0055085	solute carrier family 12;Smp_165670
Smp_169860	1.8769	1.64803	1.66013	2.16555	0.214058	0.569379	0.697035	0.169981	-2.155	0.0001	0.000349068	1.67273	2.30425	1.78997	2.31139	0.13379	0.628016	0.428279	0.13743	-1.65698	1.73418e-05	7.43247e-05	1.09098	1.44022	1.10247	1.41745	0.071197	0.377265	0.247381	0.0793706	-2.10977	1.71545e-09	9.56015e-09		normocyte binding protein 1;Smp_169860	Putative normocyte-binding protein 1 [Source:UniProtKB/TrEMBL;Acc:G4VMC1]	_	_
Smp_162110	2.03744	2.45649	2.0417	3.7322	0.418572	0.703155	0.379897	0.804515	-2.15458	5e-05	0.000181778	5.19204	5.52221	5.6485	6.96788	0.490909	0.885681	0.627673	1.23372	-1.75344	7.65621e-28	2.8328e-26	3.26763	3.33447	3.39998	4.13521	0.264573	0.508571	0.347614	0.686934	-2.46501	3.75625e-30	1.05391e-28	GO:0006855,GO:0015238,GO:0015297,GO:0016020,GO:0016021,GO:0055085	multidrug and toxin extrusion protein 2;Smp_162110	Multidrug resistance pump, putative [Source:UniProtKB/TrEMBL;Acc:G4M053]	gi|38261960|ref|NP_690872.2|	multidrug and toxin extrusion protein 2 isoform 1 [Homo sapiens]
Smp_173540	10.1217	5.78918	3.9706	6.11053	1.99234	0.730755	1.88021	1.26431	-2.14722	0.00015	0.000507999	5.68218	10.5274	4.26094	5.83912	1.30307	1.61313	0.496222	1.08571	-1.53084	5.95003e-07	3.28598e-06	3.73121	6.6254	2.76473	3.6277	0.733767	1.0392	0.336857	0.698626	-2.04536	3.5419e-11	2.40978e-10	GO:0007155,GO:0007229,GO:0008305,GO:0016020,GO:0016021	integrin alpha ps;Smp_173540	Putative uncharacterized protein [Source:UniProtKB/TrEMBL;Acc:G4VDY5]	_	_
Smp_150640	48.6268	35.003	33.4865	46.7939	6.83257	16.1456	7.43343	6.71821	-2.14225	5e-05	0.000181778	43.2574	67.2154	45.3273	59.1617	5.17567	8.70021	13.6569	6.63397	-1.62452	4.64482e-11	4.51331e-10	26.8313	39.9699	26.5832	34.4667	2.5967	4.98359	7.39438	3.63781	-2.22726	2.87762e-15	2.91535e-14		hypothetical protein;note=predicted by EVM2;Smp_150640	Putative uncharacterized protein [Source:UniProtKB/TrEMBL;Acc:G4LXS6]	_	_
Smp_143260	9.97938	8.86081	7.47647	9.61686	2.08391	1.7472	2.49414	1.84404	-2.13705	5e-05	0.000181778	9.18596	11.2039	8.69995	9.94742	1.49104	2.30894	1.20507	1.65804	-1.53011	1.73423e-38	1.16762e-36	5.71802	6.82081	5.16897	5.90221	0.736938	1.34166	0.660431	0.930698	-2.15513	4.70075e-45	2.52853e-43	GO:0005515,GO:0016020,GO:0016021	hypothetical protein;Smp_143260	Putative uncharacterized protein [Source:UniProtKB/TrEMBL;Acc:G4LUL8]	_	_
Smp_141940	8.71752	7.63428	5.42131	8.09912	2.07788	1.24335	1.86054	1.63227	-2.13222	5e-05	0.000181778	7.72771	13.8528	7.49121	8.2125	1.75261	2.04653	0.990878	1.51489	-1.46845	2.5668e-11	2.55251e-10	5.29156	8.88845	4.81342	5.39694	0.985407	1.2755	0.524174	0.839221	-2.19754	4.78425e-13	3.9374e-12		hypothetical protein;note=predicted by EVM2;Smp_141940	Putative uncharacterized protein [Source:UniProtKB/TrEMBL;Acc:G4VM52]	_	_
Smp_055440	3.88071	4.24171	2.67999	3.60697	0.764077	0.684604	1.14181	0.739115	-2.11359	5e-05	0.000181778	4.29388	4.34313	3.04741	3.90555	0.492223	1.015	0.567203	0.543259	-1.53761	1.23975e-16	2.07259e-15	2.78748	2.69365	1.85665	2.4634	0.25199	0.585334	0.374839	0.33955	-2.10446	2.31542e-19	3.26236e-18	GO:0016020,GO:0016021	hypothetical protein;Smp_055440	Putative uncharacterized protein [Source:UniProtKB/TrEMBL;Acc:G4V5W3]	_	_
Smp_150990	7.66778	7.98765	6.23924	6.55835	1.44582	1.89196	1.44559	1.87684	-2.09494	5e-05	0.000181778	7.95439	8.10495	6.65056	6.59695	0.930505	1.31502	1.01047	1.36632	-1.58258	3.42242e-26	1.11555e-24	5.25101	5.02663	4.25889	4.24739	0.526479	0.832607	0.629217	0.908148	-2.16448	7.15862e-37	2.79905e-35	GO:0003333,GO:0005887,GO:0015171,GO:0015179,GO:0015297,GO:0015807,GO:0016020,GO:0016021,GO:1902475	y+l amino acid transporter 2;Smp_150990	Putative cationic amino acid transporter [Source:UniProtKB/TrEMBL;Acc:G4VHR4]	gi|71979932|ref|NP_003477.4|	large neutral amino acids transporter small subunit 1 [Homo sapiens]
Smp_155980	4.47575	2.60057	2.04593	2.84518	1.10118	0.322675	1.2204	0.162745	-2.09201	5e-05	0.000181778	4.82595	9.9949	4.78846	5.58468	1.14899	1.91111	0.548126	0.397511	-1.67686	1.50896e-05	6.56261e-05	3.7164	7.12846	3.40952	3.74528	0.752381	1.22354	0.505302	0.335735	-2.11071	2.36959e-09	1.29754e-08		hypothetical protein;note=predicted by EVM2;Smp_155980	Putative uncharacterized protein [Source:UniProtKB/TrEMBL;Acc:G4VSE5]	_	_
Smp_212710	84.1321	84.9597	85.1227	91.7958	15.3671	24.1062	22.8018	18.8888	-2.0919	5e-05	0.000181778	98.3497	112.042	108.603	107.062	11.1463	22.1368	16.6647	17.1442	-1.61148	6.30268e-60	9.02969e-58	60.9948	66.6461	64.0263	62.4832	5.64123	12.621	9.14428	9.41005	-2.27182	1.16411e-71	1.92098e-69		gynecophoral canal protein%2C putative;Smp_212710	Putative gynecophoral canal protein [Source:UniProtKB/TrEMBL;Acc:G4VG71]	gi|209862907|ref|NP_006466.2|	periostin isoform 1 [Homo sapiens]
Smp_120620	3.91533	3.5579	3.7654	4.07405	0.550433	1.03929	1.30119	0.701135	-2.09185	5e-05	0.000181778	6.16552	6.4578	6.51029	7.19359	0.694343	1.39733	0.850383	1.27559	-1.58834	5.7676e-19	1.17848e-17	4.28653	4.25116	4.16899	4.44774	0.456278	0.95375	0.550737	0.734146	-2.12931	1.17034e-31	3.53866e-30	GO:0004871,GO:0004930,GO:0005887,GO:0007165,GO:0007166,GO:0007186,GO:0016020,GO:0016021	G protein coupled receptor fragment;Smp_120620	Amine GPCR, putative [Source:UniProtKB/TrEMBL;Acc:G4LW20]	_	_
SmVG_029207	20.4451	19.433	16.83	16.8664	4.60099	4.47787	5.01115	3.31533	-2.07968	5e-05	0.000181778	20.1272	22.3045	19.4226	17.4154	3.91143	5.47035	3.48724	3.82818	-1.3091	7.29833e-46	6.3775e-44	12.4113	13.187	11.1736	10.1285	1.56555	2.62924	1.69393	1.80529	-2.07145	9.57025e-73	1.60648e-70	GO:0007155,GO:0016020
SmVG_011949:Smp_030050	2.41863	3.46169	2.40246	2.59776	0.334087	0.813145	0.834278	0.596937	-2.07718	5e-05	0.000181778	3.34357	2.66716	2.72879	2.75193	0.17382	0.734638	0.508733	0.512049	-1.62007	8.18618e-10	6.79663e-09	2.1511	1.63997	1.66122	1.65907	0.0898479	0.434458	0.288881	0.285611	-2.17242	3.09129e-18	3.98106e-17		NK 2 class homeodomain protein Nkx2 5;Smp_030050	Putative nk-2 homeobox protein [Source:UniProtKB/TrEMBL;Acc:G4VFL0]	gi|4758090|ref|NP_004378.1|	homeobox protein Nkx-2.5 isoform 1 [Homo sapiens]
SmVG_011949:Smp_138390	2.41863	3.46169	2.40246	2.59776	0.334087	0.813145	0.834278	0.596937	-2.07718	5e-05	0.000181778	3.34357	2.66716	2.72879	2.75193	0.17382	0.734638	0.508733	0.512049	-1.62007	8.18618e-10	6.79663e-09	2.1511	1.63997	1.66122	1.65907	0.0898479	0.434458	0.288881	0.285611	-2.17242	3.09129e-18	3.98106e-17		transcription factor related 3 K09343 homeobox;Smp_138390	Putative nk-2 homeobox protein [Source:UniProtKB/TrEMBL;Acc:G4VFL1]	_	_
Smp_191970	1.05855	1.22416	1.38992	1.42637	0.314044	0.270084	0.283983	0.347859	-2.06811	5e-05	0.000181778	2.20594	1.70968	2.2388	2.02396	0.404411	0.602512	0.366874	0.631824	-1.16164	4.13704e-13	4.9973e-12	1.60652	1.19619	1.57447	1.39553	0.235801	0.389807	0.276268	0.401019	-1.61497	1.60307e-20	2.44249e-19	GO:0016020,GO:0016021	CAI 2 protein;note=tmhmm%3B%3Bquery 1-138%3B;Smp_191970	Putative uncharacterized protein [Source:UniProtKB/TrEMBL;Acc:G4VME2]	_	_
Smp_181560	14.958	8.24581	8.73671	13.0581	2.32379	1.73919	5.49693	1.21455	-2.06226	5e-05	0.000181778	8.40493	16.5643	9.71259	12.4468	1.7394	4.90635	1.14444	1.01954	-1.56831	1.58769e-05	6.87591e-05	6.33337	12.5241	6.98394	9.27448	1.14274	3.62151	0.788149	0.844012	-1.95991	5.35967e-07	2.14442e-06	GO:0003677,GO:0003700,GO:0006355	hox protein Dfd;Smp_181560	Putative uncharacterized protein [Source:UniProtKB/TrEMBL;Acc:G4VJI8]	_	_
Smp_074080	37.2023	35.7128	37.6434	40.5674	9.56474	9.54009	9.32993	7.81793	-2.05959	5e-05	0.000181778	35.1462	39.329	41.2105	39.2253	6.13373	8.01283	6.14333	6.31964	-1.50584	5.01095e-113	5.145e-110	21.3561	22.9339	23.6357	22.3214	3.01895	4.47929	3.2344	3.35202	-2.1331	3.70558e-103	1.3362e-100	GO:0000166,GO:0004672,GO:0005524,GO:0006468,GO:0016301,GO:0016310,GO:0016772	serine:threonine protein kinase NLK;Smp_074080	Serine/threonine kinase [Source:UniProtKB/TrEMBL;Acc:G4VGJ2]	gi|149408126|ref|NP_057315.3|	serine/threonine-protein kinase NLK [Homo sapiens]
Smp_099440	21.5735	16.1469	13.8865	15.1259	3.94989	3.95319	5.22108	2.92125	-2.05624	5e-05	0.000181778	18.5933	26.8902	19.3635	19.4271	3.24573	5.60643	3.2152	3.64356	-1.42881	1.2048e-30	5.24533e-29	11.8478	16.3305	11.6109	11.6037	1.70555	3.29749	1.87409	2.08046	-2.00789	9.88772e-32	3.04642e-30	GO:0001649,GO:0005615,GO:0030514,GO:0045596	bone morphogenetic protein antagonist noggin;Smp_099440	Putative bone morphogenetic protein antagonist noggin [Source:UniProtKB/TrEMBL;Acc:G4VLQ1]	gi|4885523|ref|NP_005441.1|	noggin precursor [Homo sapiens]
Smp_144110	7.29809	6.05523	4.94812	5.49385	1.17694	1.30999	2.18081	1.07134	-2.05178	5e-05	0.000181778	5.2394	7.61998	5.20834	5.15519	0.773354	1.69762	0.65895	0.730441	-1.58441	1.35195e-14	1.85494e-13	3.59503	4.79397	3.21004	3.23702	0.370103	1.03512	0.436902	0.465907	-2.15822	5.83355e-19	7.87732e-18	GO:0005272,GO:0006810,GO:0006811,GO:0006814,GO:0016020,GO:0016021,GO:0035725	FMRFamide activated amiloride sensitive sodium;Smp_144110	Putative fmrfamide-gated Na+ channel [Source:UniProtKB/TrEMBL;Acc:G4VB38]	_	_
SmVG_015690:Smp_119050	310.429	270.043	293.51	321.872	64.2344	71.5542	76.3528	77.6317	-2.04504	5e-05	0.000181778	406.446	483.968	445.067	454.112	64.8655	97.1623	77.225	93.0909	-1.43314	2.33046e-89	8.70108e-87	226.151	257.837	234.477	237.2	28.6126	49.3923	36.6591	45.317	-2.03559	3.5984e-85	7.96227e-83		collagen alpha chain;Smp_119050	Putative collagen alpha chain [Source:UniProtKB/TrEMBL;Acc:G4VIR7]	_	_
SmVG_015690:Smp_135560	310.429	270.043	293.51	321.872	64.2344	71.5542	76.3528	77.6317	-2.04504	5e-05	0.000181778	406.446	483.968	445.067	454.112	64.8655	97.1623	77.225	93.0909	-1.43314	2.33046e-89	8.70108e-87	226.151	257.837	234.477	237.2	28.6126	49.3923	36.6591	45.317	-2.03559	3.5984e-85	7.96227e-83		collagen alpha 2(I) chain;Smp_135560	Putative collagen alpha-1(I) chain [Source:UniProtKB/TrEMBL;Acc:G4VIR6]	gi|89363017|ref|NP_000384.2|	collagen alpha-2(V) chain preproprotein [Homo sapiens]
Smp_167470	2.69293	2.06859	1.33067	2.81565	0.649379	0.417355	0.571392	0.525772	-2.04144	0.0001	0.000349068	3.0887	6.46747	1.94775	4.80403	0.715032	1.03318	0.37937	0.733025	-1.39101	1.24358e-05	5.49378e-05	1.91185	3.69824	1.29731	2.81475	0.336281	0.585154	0.199326	0.381357	-2.10688	1.21252e-07	5.37819e-07	GO:0005509,GO:0005886,GO:0007155,GO:0007156,GO:0016020,GO:0016021	protocadherin fat 4;Smp_167470	Protocadherin gamma, putative [Source:UniProtKB/TrEMBL;Acc:G4LXK1]	gi|165932370|ref|NP_078858.4|	protocadherin Fat 4 precursor [Homo sapiens]
SmVG_008970	38.4328	35.1655	37.7253	43.2162	13.5558	6.7378	9.24396	8.03822	-2.0401	5e-05	0.000181778	26.6715	31.7187	32.037	30.5517	6.13992	6.4568	3.51248	4.88129	-1.45675	1.77464e-13	2.21309e-12	23.7494	25.0032	24.972	26.1637	3.67336	4.6874	2.38767	3.95791	-2.17118	7.572e-28	1.83843e-26
SmVG_019038:Smp_058080	5.51717	5.02382	5.96438	6.00133	1.49863	1.47064	0.914255	1.59292	-2.03904	5e-05	0.000181778	5.45581	6.16357	7.27111	6.60841	1.14489	1.04215	1.12017	1.22904	-1.44331	4.50896e-18	8.57329e-17	3.4772	3.62813	4.30828	3.88814	0.592923	0.607628	0.627906	0.686629	-2.08046	6.67669e-26	1.4575e-24		neuropeptide Y receptor;Smp_058080	Putative g-protein coupled receptor [Source:UniProtKB/TrEMBL;Acc:G4VK37]	gi|11545887|ref|NP_071429.1|	neuropeptide FF receptor 1 [Homo sapiens]
SmVG_019038:Smp_153420	5.51717	5.02382	5.96438	6.00133	1.49863	1.47064	0.914255	1.59292	-2.03904	5e-05	0.000181778	5.45581	6.16357	7.27111	6.60841	1.14489	1.04215	1.12017	1.22904	-1.44331	4.50896e-18	8.57329e-17	3.4772	3.62813	4.30828	3.88814	0.592923	0.607628	0.627906	0.686629	-2.08046	6.67669e-26	1.4575e-24		hypothetical protein;Smp_153420
Smp_167960	12.2291	9.31074	8.63162	10.5166	1.65063	0.587469	5.03095	2.68522	-2.03122	5e-05	0.000181778	6.44919	8.14008	7.42233	6.01075	0.715936	2.59246	0.372963	1.46102	-1.58425	2.13453e-05	8.99439e-05	8.95309	11.7834	7.68024	8.20834	1.16911	3.96686	0.254578	2.28397	-1.76705	5.59592e-06	1.91232e-05	GO:0005515	hypothetical protein;note=predicted by EVM2;note=pfam_scan%3BPfam:PF12799.2%3B%3BE()%3D1.5E-6%3Bscore%3D27.5%3Bquer y 82-119%3Bdescription%3DLRR_4;note=pfam_scan%3BPfam:PF00560.28%3B%3BE()%3D0.078%3Bscore%3D12.9%3Bquer y 60-80%3Bdescription%3DLRR_1;Smp_167960
Smp_168590	6.8235	6.19765	5.53191	6.13185	1.228	1.57034	1.81345	1.42901	-2.03082	5e-05	0.000181778	12.2615	15.0051	11.8212	11.7902	1.86137	3.568	1.9423	2.48798	-1.40473	4.97051e-36	2.90245e-34	7.40931	8.67904	6.78129	6.70442	0.917223	1.99448	1.00855	1.3191	-1.96553	4.58529e-32	1.44474e-30	GO:0005044,GO:0006898,GO:0016020,GO:0016021	Pema SRCR protein;Smp_168590	Macrophage scavenger receptor-related [Source:UniProtKB/TrEMBL;Acc:G4M0F6]	_	_
Smp_167460	5.42315	3.9283	3.26902	4.30318	0.794436	0.898621	1.52656	0.932985	-2.02695	5e-05	0.000181778	4.34901	6.25854	4.12093	4.70744	0.54984	1.50775	0.651741	0.878509	-1.48123	7.33519e-15	1.03643e-13	2.74293	3.80845	2.46918	2.79172	0.278116	0.868843	0.354079	0.47726	-2.05449	1.54989e-17	1.88151e-16	GO:0005509,GO:0005886,GO:0007155,GO:0007156,GO:0016020,GO:0016021	hypothetical protein;Smp_167460	Cadherin-related [Source:UniProtKB/TrEMBL;Acc:G4LXK0]	gi|165932370|ref|NP_078858.4|	protocadherin Fat 4 precursor [Homo sapiens]
Smp_167630	43.063	47.3247	37.8185	45.159	11.5181	9.55659	11.992	9.47773	-2.02677	5e-05	0.000181778	52.9549	53.5005	47.0305	51.2424	8.6798	11.5135	7.19663	9.33056	-1.46655	4.56228e-69	9.36864e-67	32.4833	31.3874	27.2737	29.5862	4.24556	6.47609	3.86676	5.10099	-2.08369	1.03962e-73	1.84032e-71	GO:0005385,GO:0005887,GO:0006882,GO:0016020,GO:0016021,GO:0030001,GO:0046873,GO:0055085,GO:0071578	zinc transporter foi;Smp_167630	Solute carrier family, putative [Source:UniProtKB/TrEMBL;Acc:G4LVV0]	gi|223633937|ref|NP_689938.2|	zinc transporter ZIP12 isoform 2 [Homo sapiens]
Smp_074190	4.85909	5.00657	3.9129	3.72408	0.875231	0.913975	1.24387	1.28049	-2.02062	5e-05	0.000181778	6.80507	6.71929	5.67244	5.03136	1.08123	1.63357	1.10409	1.66399	-1.23761	2.49423e-36	1.49909e-34	4.13581	3.96892	3.28574	2.86818	0.560968	1.01254	0.587641	0.917698	-1.66822	3.61858e-27	8.38822e-26		LIN 24 (Twenty four) Like family member;Smp_074190	Putative uncharacterized protein [Source:UniProtKB/TrEMBL;Acc:G4VLA4]	_	_
Smp_074900	22.7181	28.2584	23.7792	29.5852	5.54353	7.32681	5.50779	7.46675	-2.01335	5e-05	0.000181778	37.7308	34.7325	34.9358	40.567	5.23894	6.3516	5.60964	7.95991	-1.51856	1.14742e-77	3.14164e-75	23.0414	20.3047	20.1745	23.2796	2.57763	3.54871	3.00669	4.27649	-2.16113	6.4893e-65	7.99745e-63	GO:0005158	docking protein 3;Smp_074900	Putative uncharacterized protein [Source:UniProtKB/TrEMBL;Acc:G4VH18]	_	_
Smp_181060	8.53901	7.90661	9.09542	6.75008	1.34923	1.7993	1.78254	3.08095	-2.0109	5e-05	0.000181778	14.2623	13.081	15.4851	11.861	1.71999	2.57107	1.98186	3.50057	-1.48477	7.87804e-37	4.80522e-35	9.20451	8.26013	9.68039	7.11832	0.949633	1.51251	1.02434	2.12439	-2.0771	3.75243e-29	9.98188e-28		hypothetical protein;note=predicted by EVM2;Smp_181060	Putative uncharacterized protein [Source:UniProtKB/TrEMBL;Acc:G4VC41]	_	_
SmVG_020021:Smp_141980	14.9409	12.2339	10.6874	13.4999	3.2918	3.14062	3.37757	2.94312	-2.00985	5e-05	0.000181778	10.0242	14.5251	9.15164	10.7807	1.74973	2.10965	1.13467	1.69531	-1.64182	2.67622e-26	8.84015e-25	7.66858	10.0199	6.91852	7.65546	1.18479	1.67811	1.07173	1.36102	-2.06473	8.47343e-51	5.6505e-49		cAMP specific 3'%2C5' cyclic phosphodiesterase 4D;Smp_141980	Putative camp-specific 3,5-cyclic phosphodiesterase [Source:UniProtKB/TrEMBL;Acc:G4VM44]	gi|149363666|ref|NP_001092289.1|	cAMP-specific 3',5'-cyclic phosphodiesterase 4C isoform PDE4C-2 [Homo sapiens]
SmVG_020021:Smp_141990	14.9409	12.2339	10.6874	13.4999	3.2918	3.14062	3.37757	2.94312	-2.00985	5e-05	0.000181778	10.0242	14.5251	9.15164	10.7807	1.74973	2.10965	1.13467	1.69531	-1.64182	2.67622e-26	8.84015e-25	7.66858	10.0199	6.91852	7.65546	1.18479	1.67811	1.07173	1.36102	-2.06473	8.47343e-51	5.6505e-49		3' 5' cyclic nucleotide phosphodiesterase;Smp_141990	Putative uncharacterized protein [Source:UniProtKB/TrEMBL;Acc:G4VM43]	_	_
Smp_000660	175.257	181.324	158.836	173.162	45.7597	46.6232	44.2985	34.3504	-2.00936	5e-05	0.000181778	282.87	297.596	268.314	272.844	48.7936	64.36	47.4336	45.8836	-1.43603	5.09164e-63	8.36455e-61	172.802	174.425	155.632	156.854	24.0902	36.1976	25.498	24.7093	-2.03163	1.30461e-66	1.69356e-64	GO:0003824,GO:0004587,GO:0005737,GO:0008152,GO:0008483,GO:0010121,GO:0016740,GO:0019544,GO:0030170,GO:0042802	ornithine--oxo-acid transaminase;Smp_000660	Ornithine--oxo-acid transaminase [Source:UniProtKB/TrEMBL;Acc:G4LYG5]	gi|226442705|ref|NP_001140062.1|	alanine--glyoxylate aminotransferase 2-like 1 isoform 2 [Homo sapiens]
Smp_158160	2.30564	1.49882	2.16819	1.7496	0.512851	0.425813	0.584398	0.397955	-2.00715	5e-05	0.000181778	1.83672	2.94961	3.11762	2.34802	0.526644	0.649074	0.450284	0.503077	-1.29216	3.02642e-18	5.8446e-17	1.12854	1.63733	1.66816	1.32356	0.184655	0.360208	0.203521	0.234143	-2.00689	2.19609e-23	4.0418e-22	GO:0003676,GO:0003677,GO:0006355,GO:0008270	RNA binding protein lin 28;Smp_158160	Putative rna-binding protein lin-28 [Source:UniProtKB/TrEMBL;Acc:G4VM04]	_	_
Smp_161520	4.27171	3.2148	2.51538	3.86138	0.442313	0.806066	1.24429	0.973662	-1.99979	5e-05	0.000181778	3.80503	5.02549	3.5449	4.17449	0.374387	1.24942	0.681485	1.06167	-1.41122	1.79213e-10	1.62478e-09	2.30651	2.90226	2.02282	2.38824	0.202842	0.708539	0.365718	0.5744	-1.87659	2.40364e-16	2.68987e-15	GO:0005509,GO:0005886,GO:0007155,GO:0007156,GO:0016020,GO:0016021	protocadherin 9;Smp_161520	Cadherin-related [Source:UniProtKB/TrEMBL;Acc:G4LXY3]	gi|270288731|ref|NP_001161835.1|	protocadherin-11 X-linked isoform h precursor [Homo sapiens]
SmVG_025638:Smp_102210	61.887	57.8818	39.9954	56.3375	15.9095	11.3734	16.5292	10.3102	-1.99742	5e-05	0.000181778	60.1013	70.9312	46.8734	59.4703	10.3693	15.0972	7.04647	8.375	-1.5293	3.70292e-17	6.42588e-16	42.173	45.8473	31.4229	39.1664	6.42905	10.1559	5.05544	5.7596	-1.99844	3.2318e-28	7.98599e-27		lysosomal alpha mannosidase;Smp_102210	Putative uncharacterized protein [Source:UniProtKB/TrEMBL;Acc:G4VTI0]	_	_
SmVG_025638:Smp_131580	61.887	57.8818	39.9954	56.3375	15.9095	11.3734	16.5292	10.3102	-1.99742	5e-05	0.000181778	60.1013	70.9312	46.8734	59.4703	10.3693	15.0972	7.04647	8.375	-1.5293	3.70292e-17	6.42588e-16	42.173	45.8473	31.4229	39.1664	6.42905	10.1559	5.05544	5.7596	-1.99844	3.2318e-28	7.98599e-27		lysosomal alpha mannosidase;Smp_131580	Putative lysosomal alpha-mannosidase (Mannosidase alpha class 2b member 1) [Source:UniProtKB/TrEMBL;Acc:G4VTI2]	gi|51477714|ref|NP_002363.2|	alpha-mannosidase 2 [Homo sapiens]
SmVG_024838:Smp_084440	15.7049	13.8555	9.55714	7.75841	2.93197	2.52208	4.50935	1.84718	-1.98877	5e-05	0.000181778	23.675	25.4938	16.4861	12.7257	3.20832	6.40496	2.61626	2.41209	-1.45469	1.91865e-08	1.32882e-07	18.4885	21.001	12.9185	9.83206	2.1232	4.67821	1.58855	1.55	-2.10922	6.06361e-12	4.4928e-11		hypothetical protein;Smp_084440	Putative uncharacterized protein [Source:UniProtKB/TrEMBL;Acc:G4VSD0]	_	_
SmVG_024838:Smp_084450	15.7049	13.8555	9.55714	7.75841	2.93197	2.52208	4.50935	1.84718	-1.98877	5e-05	0.000181778	23.675	25.4938	16.4861	12.7257	3.20832	6.40496	2.61626	2.41209	-1.45469	1.91865e-08	1.32882e-07	18.4885	21.001	12.9185	9.83206	2.1232	4.67821	1.58855	1.55	-2.10922	6.06361e-12	4.4928e-11		hypothetical protein;note=predicted by EVM2;Smp_084450
SmVG_025684:Smp_163700	4.71616	4.90515	4.96559	4.62341	0.855967	1.42924	1.03614	1.53369	-1.98433	5e-05	0.000181778	9.0223	8.69109	9.0505	8.11898	1.02682	1.39147	1.61936	1.84127	-1.54119	3.62962e-50	3.75802e-48	5.52764	5.17182	5.3247	4.68769	0.531083	0.844986	0.876098	1.07871	-2.08967	2.8568e-47	1.68568e-45		hypothetical protein;Smp_163700	Putative uncharacterized protein [Source:UniProtKB/TrEMBL;Acc:G4VTX2]	_	_
SmVG_025684:Smp_204320	4.71616	4.90515	4.96559	4.62341	0.855967	1.42924	1.03614	1.53369	-1.98433	5e-05	0.000181778	9.0223	8.69109	9.0505	8.11898	1.02682	1.39147	1.61936	1.84127	-1.54119	3.62962e-50	3.75802e-48	5.52764	5.17182	5.3247	4.68769	0.531083	0.844986	0.876098	1.07871	-2.08967	2.8568e-47	1.68568e-45		hypothetical protein;note=tmhmm%3B%3Bquery 1-150%3B;note=%3Bquery 44-55%3B;note=%3Bquery 111-116%3B;note=%3Bquery 24-43%3B;note=%3Bquery 56-73%3B;note=%3Bquery 88-110%3B;note=%3Bquery 117-136%3B;note=%3Bquery 1-23%3B;note=%3Bquery 74-87%3B;note=%3Bquery 137-150%3B;Smp_204320	Putative uncharacterized protein Smp_204320 [Source:UniProtKB/TrEMBL;Acc:G4VTX3]	_	_
SmVG_001558	3.28636	5.10591	2.70851	3.70778	0.642986	1.33431	0.926392	0.855591	-1.9779	5e-05	0.000181778	22.0729	16.708	17.4895	18.9858	1.74213	3.02162	3.30714	3.32152	-1.64617	1.08118e-28	4.21558e-27	13.9256	10.028	10.425	11.228	0.9402	1.7541	1.91658	1.94732	-2.29614	4.13073e-32	1.30999e-30
Smp_149010	9.7862	9.02455	7.25043	9.45905	2.19265	1.70695	3.03005	2.08861	-1.97772	5e-05	0.000181778	9.09373	10.9141	8.38146	9.82955	1.45383	2.84399	1.08825	1.74568	-1.47489	6.28753e-18	1.17733e-16	5.72698	6.61021	5.01148	5.81107	0.747483	1.66564	0.601792	0.96332	-2.03967	3.22962e-24	6.35224e-23	GO:0005509,GO:0005886,GO:0007155,GO:0007156,GO:0016020,GO:0016021	protocadherin gamma b;Smp_149010	Cadherin-related [Source:UniProtKB/TrEMBL;Acc:G4LWK7]	gi|14589929|ref|NP_061908.1|	protocadherin-18 precursor [Homo sapiens]
Smp_155570	95.4184	121.928	90.3264	102.963	21.1171	32.6985	30.8043	19.8524	-1.97474	5e-05	0.000181778	296.499	233.872	225.832	232.12	18.5304	32.4816	26.7289	22.7491	-2.03168	4.6632e-58	6.24514e-56	212.919	162.824	156.313	160.616	10.8524	21.8277	17.5025	14.6811	-2.88468	2.79781e-70	4.39346e-68	GO:0003824,GO:0004553,GO:0005975,GO:0008152,GO:0016787,GO:0016798	endoglycoceramidase;Smp_155570	Putative uncharacterized protein [Source:UniProtKB/TrEMBL;Acc:G4LZM9]	_	_
SmVG_025381:Smp_104270	197.511	264.134	174.913	218.6	45.5058	64.2803	59.216	50.3698	-1.96281	5e-05	0.000181778	271.325	221.028	203.322	226.65	33.9559	57.4631	46.5989	47.6797	-1.35393	3.4694e-37	2.20343e-35	166.984	130.504	118.45	130.796	16.8959	32.4774	24.9847	25.7013	-1.92364	1.35088e-41	6.35369e-40		ectonucleotide pyrophosphatase:phosphodiesterase;Smp_104270	Putative ectonucleotide pyrophosphatase/phosphodiesterase [Source:UniProtKB/TrEMBL;Acc:G4VRB5]	gi|91823274|ref|NP_006200.3|	ectonucleotide pyrophosphatase/phosphodiesterase family member 2 isoform 1 preproprotein [Homo sapiens]
SmVG_025381:Smp_180390	197.511	264.134	174.913	218.6	45.5058	64.2803	59.216	50.3698	-1.96281	5e-05	0.000181778	271.325	221.028	203.322	226.65	33.9559	57.4631	46.5989	47.6797	-1.35393	3.4694e-37	2.20343e-35	166.984	130.504	118.45	130.796	16.8959	32.4774	24.9847	25.7013	-1.92364	1.35088e-41	6.35369e-40		mitochondrial carrier 2;Smp_180390	Putative mitochondrial carrier [Source:UniProtKB/TrEMBL;Acc:G4VRB6]	gi|7657347|ref|NP_055157.1|	mitochondrial carrier homolog 2 [Homo sapiens]
SmVG_016374	6.07401	7.12139	6.67519	7.28858	1.69556	2.50701	0.935219	1.85808	-1.95687	0.00035	0.00110242	6.41184	5.83655	6.21732	6.93473	0.835744	0.565417	1.06396	0.939121	-1.75078	1.30472e-20	3.06783e-19	4.57638	3.91884	4.25579	4.24491	0.573232	0.429634	0.965009	0.748612	-2.10555	3.83519e-17	4.5205e-16
Smp_150370	3.64021	3.75513	3.17187	3.72821	0.958858	0.778289	0.921412	1.02542	-1.95622	5e-05	0.000181778	3.95519	4.03713	3.69731	3.97824	0.706369	0.906392	0.548116	0.889008	-1.37643	6.54571e-14	8.45385e-13	2.50567	2.51213	2.36224	2.37645	0.347353	0.533926	0.293796	0.493709	-1.99744	9.30196e-26	2.00807e-24	GO:0004871,GO:0004930,GO:0005886,GO:0005887,GO:0007165,GO:0007186,GO:0007216,GO:0008066,GO:0016020,GO:0016021,GO:0051966	metabotropic glutamate receptor;Smp_150370	Putative metabotropic glutamate receptor 2, 3 (Mglur group 2) [Source:UniProtKB/TrEMBL;Acc:G4VAL7]	gi|4504141|ref|NP_000832.1|	metabotropic glutamate receptor 4 precursor [Homo sapiens]
Smp_154760	63.9325	53.3245	71.87	81.7787	16.8276	17.7354	18.0694	17.2431	-1.95493	5e-05	0.000181778	65.9581	84.4216	95.7791	99.0412	13.961	19.5501	15.2956	17.9547	-1.37986	3.24369e-51	3.50575e-49	39.2778	48.3222	54.1351	55.396	6.70097	10.7386	7.90053	9.34904	-1.97418	3.54391e-51	2.42982e-49	GO:0005509,GO:0005515	egf domain protein;Smp_154760	Egf-like domain protein [Source:UniProtKB/TrEMBL;Acc:G4V9N7]	gi|148833508|ref|NP_060087.3|	neurogenic locus notch homolog protein 1 preproprotein [Homo sapiens]
Smp_199210	81.2806	51.7471	48.3162	66.2484	16.7668	13.2165	21.2726	12.6293	-1.95441	5e-05	0.000181778	82.6397	133.349	84.2555	103.825	17.6281	28.9884	13.4688	17.7378	-1.40472	4.34443e-16	6.81014e-15	50.6807	78.0614	49.0467	59.8436	8.87148	16.4416	7.43964	9.74423	-1.98908	3.84917e-24	7.55554e-23	GO:0000166,GO:0005388,GO:0005524,GO:0005887,GO:0006810,GO:0006811,GO:0006812,GO:0006816,GO:0016020,GO:0016021,GO:0016787,GO:0019829,GO:0030165,GO:0043231,GO:0046872,GO:0051480,GO:0070588	plasma membrane calcium transporting ATPase;Smp_199210	Plasma membrane calcium-transporting atpase,putative [Source:UniProtKB/TrEMBL;Acc:G4M1H5]	gi|48255951|ref|NP_001001331.1|	plasma membrane calcium-transporting ATPase 2 isoform 1 [Homo sapiens]
Smp_144910	154.054	132.707	146.866	165.697	32.8577	39.8217	42.4257	39.5419	-1.95436	5e-05	0.000181778	189.244	227.042	215.977	224.875	31.43	51.3249	40.7355	46.6297	-1.37092	1.78122e-86	5.93147e-84	106.443	122.292	114.837	118.862	13.8482	26.3143	19.3569	22.8247	-1.94414	3.01247e-66	3.80901e-64	GO:0005581	collagen type I:II:III:V:XI alpha;Smp_144910	Putative collagen alpha-1(V) chain [Source:UniProtKB/TrEMBL;Acc:G4VJQ2]	_	_
Smp_131020	48.9931	41.4055	34.7623	35.1344	10.7169	7.1603	17.7534	5.74103	-1.95402	5e-05	0.000181778	51.5042	66.1911	46.7625	45.927	8.7829	19.9151	6.0984	6.14385	-1.48924	3.78929e-08	2.52777e-07	32.5425	40.1972	27.9931	27.2127	4.50685	11.4939	3.37377	3.41682	-1.98531	1.95338e-11	1.37912e-10	GO:0016020,GO:0016021	transmembrane and TPR repeat containing protein;Smp_131020	Putative uncharacterized protein [Source:UniProtKB/TrEMBL;Acc:G4VHF1]	_	_
SmVG_018943:Smp_164630	4.19424	2.46969	1.88438	3.34525	0.952533	0.48937	0.838353	0.805418	-1.94652	5e-05	0.000181778	3.44337	5.9559	2.9708	4.3035	0.834782	1.11435	0.436371	0.940825	-1.37109	5.64993e-09	4.22151e-08	2.08131	3.48116	1.76353	2.43266	0.442063	0.625687	0.250264	0.547392	-1.86483	2.29562e-13	1.95539e-12		protein sickie;Smp_164630	Putative uncharacterized protein [Source:UniProtKB/TrEMBL;Acc:G4VKJ3]	_	_
SmVG_018943:Smp_164640	4.19424	2.46969	1.88438	3.34525	0.952533	0.48937	0.838353	0.805418	-1.94652	5e-05	0.000181778	3.44337	5.9559	2.9708	4.3035	0.834782	1.11435	0.436371	0.940825	-1.37109	5.64993e-09	4.22151e-08	2.08131	3.48116	1.76353	2.43266	0.442063	0.625687	0.250264	0.547392	-1.86483	2.29562e-13	1.95539e-12		neuron navigator 2;Smp_164640	Putative uncharacterized protein [Source:UniProtKB/TrEMBL;Acc:G4VKJ2]	_	_
Smp_205770	222.457	139.193	157.522	188.773	50.5738	37.0792	63.5266	32.9023	-1.94329	5e-05	0.000181778	91.585	138.201	104.724	107.329	23.8734	31.7433	19.9989	14.3867	-1.30527	3.3873e-11	3.32549e-10	103.559	163.166	124.573	123.99	16.3549	34.947	16.8415	18.1533	-1.98474	2.66455e-21	4.24583e-20	GO:0016020,GO:0016021	choline transporter protein;note=tmhmm%3B%3Bquery 1-88%3B;note=iprscan%3BPANTHER:PTHR12385:SF8%3B%3Bscore%3D7.8E-16%3Bquery 6-87%3Bdescription%3Dnull;Smp_205770
Smp_015100	6.44285	6.16524	5.51529	5.7785	1.47087	1.93986	1.76877	1.08824	-1.93111	5e-05	0.000181778	6.25638	6.88716	6.10142	5.81488	1.03595	1.4959	1.28388	0.897099	-1.40671	4.26302e-16	6.69957e-15	3.80029	3.99756	3.56602	3.30529	0.50309	0.854824	0.675953	0.473168	-1.97614	3.92303e-24	7.68503e-23	GO:0016020,GO:0016021	hypothetical protein;Smp_015100	Putative uncharacterized protein [Source:UniProtKB/TrEMBL;Acc:G4VGB5]	_	_
Smp_143410	14.1916	12.236	12.2426	12.8237	3.52359	3.30913	3.62331	3.05985	-1.92974	5e-05	0.000181778	18.8717	21.4325	20.0202	19.3624	4.00084	4.94343	3.4131	3.97172	-1.33194	2.82728e-73	6.83038e-71	11.3663	12.4084	11.5347	10.9925	2.00438	2.75238	1.81909	2.09261	-1.87446	3.42722e-67	4.57088e-65	GO:0016020,GO:0016021	hypothetical protein;Smp_143410	Putative uncharacterized protein [Source:UniProtKB/TrEMBL;Acc:G4M0K2]	_	_
Smp_136710	134.904	100.078	98.0431	121.666	27.7825	26.0697	40.5361	25.5299	-1.92283	5e-05	0.000181778	123.199	173.837	133.515	154.001	24.8222	45.9756	22.6846	28.3734	-1.33838	3.45114e-21	8.43681e-20	75.2714	102.017	77.487	88.374	12.2717	25.8876	12.1685	15.26	-1.88381	7.81109e-29	2.03884e-27	GO:0000166,GO:0005388,GO:0005524,GO:0005887,GO:0006810,GO:0006811,GO:0006812,GO:0006816,GO:0006874,GO:0016020,GO:0016021,GO:0016787,GO:0019829,GO:0033017,GO:0046872,GO:0070588,GO:0005783	calcium transporting atpase;Smp_136710	Putative calcium-transporting atpase sarcoplasmic/endoplasmic reticulum type (Calcium pump) [Source:UniProtKB/TrEMBL;Acc:G4VFY5]	gi|10835220|ref|NP_004311.1|	sarcoplasmic/endoplasmic reticulum calcium ATPase 1 isoform a [Homo sapiens]
Smp_148670	7.90325	7.41956	6.8458	7.68474	1.76132	2.0314	1.91873	2.16787	-1.92175	5e-05	0.000181778	9.06578	10.6154	9.63687	9.26073	1.16304	2.10969	1.92879	2.49408	-1.37948	3.7849e-29	1.50918e-27	5.58284	6.28661	5.61807	5.36323	0.629285	1.1919	1.04427	1.35424	-1.9174	1.0308e-32	3.35647e-31	GO:0000155,GO:0000160,GO:0004871,GO:0005216,GO:0005249,GO:0005622,GO:0005887,GO:0006355,GO:0006810,GO:0006811,GO:0006813,GO:0007165,GO:0016020,GO:0016021,GO:0023014,GO:0034220,GO:0042391,GO:0055085,GO:0071805	voltage gated potassium channel;Smp_148670	Putative voltage-gated potassium channel [Source:UniProtKB/TrEMBL;Acc:G4V909]	gi|27437001|ref|NP_758872.1|	potassium voltage-gated channel subfamily H member 1 isoform 1 [Homo sapiens]
Smp_145210	14.2496	10.9315	9.65529	11.8698	3.32024	1.93607	4.33865	2.78249	-1.9159	5e-05	0.000181778	10.7491	15.5251	10.8042	11.6844	2.29041	3.85957	1.3501	2.42949	-1.38505	2.8464e-12	3.15382e-11	6.78346	9.39687	6.46319	6.97146	1.21369	2.26895	0.760355	1.36926	-1.89626	7.67785e-18	9.57126e-17	GO:0005509,GO:0005886,GO:0007155,GO:0007156,GO:0016020,GO:0016021	protocadherin 1;Smp_145210	Putative cadherin [Source:UniProtKB/TrEMBL;Acc:G4VRE5]	gi|14589946|ref|NP_116755.1|	protocadherin-11 Y-linked isoform c [Homo sapiens]
Smp_176540	14.0154	12.1106	11.8856	13.8306	3.98568	2.8452	3.83429	3.09394	-1.91373	5e-05	0.000181778	13.4439	17.1049	14.8568	15.3366	2.9197	3.79149	2.26998	2.8698	-1.38618	6.31632e-45	5.25833e-43	8.1699	9.99703	8.56219	8.77794	1.42497	2.12446	1.19331	1.53757	-1.95766	1.74159e-52	1.26538e-50	GO:0005509,GO:0005886,GO:0007155,GO:0007156,GO:0016020,GO:0016021	protocadherin 18;Smp_176540	Putative cadherin [Source:UniProtKB/TrEMBL;Acc:G4VR12]	gi|14589920|ref|NP_116750.1|	protocadherin-11 X-linked isoform c precursor [Homo sapiens]
Smp_136480	10.5361	8.1042	8.8614	8.00368	2.68566	1.96785	2.97316	1.80945	-1.91177	5e-05	0.000181778	7.96224	10.9909	9.65415	7.85836	1.81656	2.60264	1.33501	1.59192	-1.36243	7.94613e-23	2.14233e-21	4.99433	6.58202	5.72164	4.60386	0.924148	1.5018	0.75504	0.912344	-1.86974	3.64033e-31	1.07401e-29		CCAAT box DNA binding protein subunit B;Smp_136480
Smp_010550	1206.34	853.419	274.78	544.707	242.923	89.1789	272.495	161.519	-1.91006	5e-05	0.000181778	959.564	1442.35	340.507	610.62	177.344	280.443	70.0784	157.726	-1.27307	0.00185606	0.00515289	609.853	877.549	205.715	366.309	92.3168	163.355	39.4876	89.1181	-1.88365	6.00239e-06	2.04048e-05		hypothetical protein;note=tmhmm%3B%3Bquery 1-173%3B;Smp_010550	Putative uncharacterized protein [Source:UniProtKB/TrEMBL;Acc:G4VMN2]	_	_
Smp_179570	7.69226	6.31905	4.7689	6.47061	2.04587	1.15585	2.11482	1.40337	-1.90982	5e-05	0.000181778	7.78714	10.4065	6.44641	7.36127	1.44686	2.1446	0.693052	1.62963	-1.48183	1.1296e-10	1.04882e-09	4.949	6.51764	3.94251	4.46524	0.791077	1.28385	0.416828	0.951653	-2.01328	1.07559e-16	1.2291e-15	GO:0016020,GO:0016021	otopetrin;Smp_179570	Otopetrin, putative [Source:UniProtKB/TrEMBL;Acc:G4M1S8]	_	_
Smp_122950	1.87008	1.2417	1.48995	1.64804	0.432242	0.363046	0.57471	0.299747	-1.90418	5e-05	0.000181778	1.72824	2.52714	2.14767	2.06769	0.430083	0.677673	0.311803	0.436734	-1.27524	6.65457e-15	9.46777e-14	1.10218	1.53863	1.28947	1.24528	0.221521	0.406817	0.172327	0.283124	-1.70275	1.2823e-16	1.45507e-15		hypothetical protein;note=predicted by EVM2;Smp_122950	Putative uncharacterized protein [Source:UniProtKB/TrEMBL;Acc:G4VCG7]	_	_
Smp_121920	2.61148	1.98582	2.03932	2.01716	0.588671	0.820266	0.392468	0.515049	-1.90141	5e-05	0.000181778	2.4158	3.16082	2.46907	2.44228	0.492743	0.473826	0.603942	0.591163	-1.30214	1.06745e-12	1.23262e-11	1.5459	1.86378	1.53425	1.37422	0.215554	0.270529	0.320813	0.30735	-1.96306	1.25655e-20	1.92961e-19	GO:0016020,GO:0016021,GO:0055085	vesicular amine transporter;Smp_121920	Putative vesicular amine transporter [Source:UniProtKB/TrEMBL;Acc:G4VGD1]	gi|215272390|ref|NP_001135796.1|	chromaffin granule amine transporter isoform b [Homo sapiens]
Smp_165150	2.81758	3.00576	2.31235	2.66557	0.864568	0.671945	0.855491	0.516203	-1.893	5e-05	0.000181778	4.21057	3.88185	3.67616	3.43713	0.774548	1.00897	0.637771	0.823295	-1.29223	2.59663e-29	1.04895e-27	2.60037	2.34159	2.19817	2.02294	0.406602	0.600738	0.380396	0.451907	-1.77075	1.06701e-31	3.26525e-30	GO:0005515	serine:threonine protein phosphatase 6;Smp_165150	Putative uncharacterized protein [Source:UniProtKB/TrEMBL;Acc:G4VFC3]	_	_
Smp_149130	10.5136	9.92405	9.53816	12.6602	3.23746	2.92653	2.63162	2.69756	-1.89129	5e-05	0.000181778	11.2773	12.8419	12.1989	14.8255	2.57929	2.78133	2.17121	2.62769	-1.34937	1.47291e-37	9.55146e-36	6.84479	7.49554	6.99419	8.46486	1.2519	1.53865	1.13701	1.40108	-1.92805	9.8379e-33	3.21416e-31	GO:0003779,GO:0005509,GO:0005515	fimbrin:plastin;Smp_149130	Putative fimbrin/plastin [Source:UniProtKB/TrEMBL;Acc:G4VH98]	gi|167614506|ref|NP_002289.2|	plastin-2 [Homo sapiens]
Smp_207040	2.6449	3.55031	2.86791	3.36166	0.736174	0.704959	1.01833	0.892682	-1.89006	5e-05	0.000181778	4.56311	3.77827	4.30673	4.39808	0.856915	1.35173	0.915471	1.13747	-1.13424	1.17126e-17	2.13684e-16	2.81651	2.25434	2.52281	2.58507	0.431229	0.834995	0.534415	0.664029	-1.51155	3.69804e-20	5.48843e-19	GO:0005509,GO:0005544	annexin;Smp_207040
Smp_145130	6.91202	6.03372	4.28308	5.38409	1.99947	0.871442	1.84149	1.39679	-1.88809	5e-05	0.000181778	6.42709	7.31746	4.93243	5.46712	1.46263	1.92584	0.908455	1.58316	-1.17138	2.28712e-13	2.82079e-12	4.04276	4.72149	3.10244	3.40112	0.935135	1.4363	0.668941	1.04327	-1.35304	1.85359e-12	1.4472e-11		rassf;Smp_145130	Rassf, putative [Source:UniProtKB/TrEMBL;Acc:G4M0R2]	_	_
Smp_160300	0.734748	0.968229	1.03333	1.06098	0.0561658	0.601259	0.185619	0.183558	-1.88709	0.0002	0.000662986	2.63217	2.32082	3.4473	3.11906	0.235863	0.282971	0.842269	0.529769	-1.62746	9.08373e-08	5.71315e-07	1.85245	1.54086	2.2526	2.05588	0.143594	0.250118	0.490045	0.345299	-2.14869	1.20735e-13	1.05613e-12	GO:0016020,GO:0016021	hypothetical protein;Smp_160300	Putative uncharacterized protein [Source:UniProtKB/TrEMBL;Acc:G4VTH5]	_	_
Smp_121190	34.9657	34.4832	30.8985	36.9679	8.81845	9.7292	8.40239	10.2781	-1.88302	5e-05	0.000181778	39.1432	42.9427	38.2548	42.4451	7.15595	8.99915	7.4132	10.3929	-1.31375	2.2006e-74	5.53339e-72	24.1409	25.4932	22.5083	24.7065	3.57074	5.16236	4.06362	5.66715	-1.86414	1.92715e-68	2.71923e-66	GO:0005216,GO:0005244,GO:0005249,GO:0005251,GO:0005267,GO:0005515,GO:0006810,GO:0006811,GO:0006813,GO:0008076,GO:0016020,GO:0016021,GO:0034765,GO:0051260,GO:0055085,GO:0071805	voltage gated potassium channel;Smp_121190	Voltage-gated potassium channel,putative [Source:UniProtKB/TrEMBL;Acc:G4LZ18]	gi|25952108|ref|NP_002243.3|	potassium voltage-gated channel subfamily S member 3 [Homo sapiens]
SmVG_018887	401.316	441.014	495.684	440.799	91.6748	112.372	183.639	94.5804	-1.88301	5e-05	0.000181778	278.699	248.475	333.015	248.725	34.7164	95.4041	43.7819	46.4708	-1.37539	3.96113e-15	5.74178e-14	268.786	246.825	330.008	260.92	37.1793	93.2402	50.2475	44.1843	-1.76419	3.04046e-22	5.13031e-21
Smp_191500	5.65698	2.99648	1.95215	3.38587	0.966764	0.335307	0.703772	1.80183	-1.87757	0.00135	0.00373362	3.98832	6.61576	2.62721	3.42239	0.581055	0.561207	0.402939	1.58172	-1.38525	0.000845089	0.00254954	2.89026	4.46961	1.57692	2.30656	0.284092	0.316002	0.210123	0.87761	-2.14059	3.70293e-06	1.31002e-05	GO:0005249,GO:0006813,GO:0008076	potassium channel%2C KvQLT family member (kqt 1);Smp_191500	Putative uncharacterized protein [Source:UniProtKB/TrEMBL;Acc:G4VB78]	_	_
Smp_035160	6.80987	6.69148	5.5546	6.19758	1.79738	1.10615	2.88673	1.10588	-1.87262	5e-05	0.000181778	9.14279	10.2079	7.51389	8.60931	1.85471	3.62715	0.806464	1.33981	-1.38048	1.68776e-06	8.66814e-06	5.46572	6.29561	4.41529	4.89119	1.01134	2.08332	0.447819	0.698721	-1.73193	5.58783e-09	2.93278e-08	GO:0005216,GO:0005244,GO:0005249,GO:0005250,GO:0005251,GO:0005267,GO:0005515,GO:0006810,GO:0006811,GO:0006813,GO:0008076,GO:0016020,GO:0016021,GO:0034765,GO:0051260,GO:0055085,GO:0071805	potassium voltage gated channel subfamily D;Smp_035160	Putative voltage-gated potassium channel [Source:UniProtKB/TrEMBL;Acc:G4V811]	gi|4826784|ref|NP_004966.1|	potassium voltage-gated channel subfamily B member 1 [Homo sapiens]
SmVG_008301:Smp_011430	2.72977	2.26758	2.05576	2.33346	0.593868	0.886762	0.567793	0.517587	-1.87107	5e-05	0.000181778	2.23769	2.82653	2.33002	2.30033	0.363626	0.580275	0.591687	0.469007	-1.32183	3.25393e-19	6.8183e-18	1.40172	1.69382	1.383	1.37021	0.185611	0.317778	0.334899	0.240856	-1.90098	3.15753e-23	5.72472e-22		protocadherin 1;Smp_011430	Putative cadherin [Source:UniProtKB/TrEMBL;Acc:G4VD70]	gi|27754773|ref|NP_115796.2|	protocadherin-1 isoform 2 precursor [Homo sapiens]
SmVG_008301:Smp_128290	2.72977	2.26758	2.05576	2.33346	0.593868	0.886762	0.567793	0.517587	-1.87107	5e-05	0.000181778	2.23769	2.82653	2.33002	2.30033	0.363626	0.580275	0.591687	0.469007	-1.32183	3.25393e-19	6.8183e-18	1.40172	1.69382	1.383	1.37021	0.185611	0.317778	0.334899	0.240856	-1.90098	3.15753e-23	5.72472e-22		hypothetical protein;Smp_128290	Putative uncharacterized protein [Source:UniProtKB/TrEMBL;Acc:G4VD71]	_	_
Smp_212330	8.1318	6.654	4.48889	5.2348	1.61539	0.718138	2.34352	2.02528	-1.8706	5e-05	0.000181778	31.5871	43.3935	21.1027	29.1637	7.60782	10.2874	2.35761	5.76897	-1.39658	2.75531e-05	0.000113729	19.8143	26.516	12.8026	17.3782	3.70671	6.05742	1.32857	3.21909	-1.89206	6.80937e-09	3.53767e-08	GO:0003899,GO:0032774	DNA directed RNA polymerase III largest subunit;Smp_212330	Putative dna-directed RNA polymerase III largest subunit [Source:UniProtKB/TrEMBL;Acc:G4VLI8]	gi|55741655|ref|NP_066010.1|	anoctamin-8 [Homo sapiens]
Smp_096480	4.76704	5.18589	4.55296	4.3026	1.29698	1.22347	1.10487	1.53761	-1.86512	5e-05	0.000181778	5.17414	5.08967	5.12272	4.35288	0.922146	1.02172	0.818495	1.29131	-1.33023	3.05782e-29	1.22721e-27	3.20276	3.02094	3.02405	2.53935	0.46564	0.584548	0.45085	0.703307	-1.8917	8.36382e-35	3.02714e-33	GO:0005230,GO:0005254,GO:0005886,GO:0006810,GO:0006811,GO:0006821,GO:0016020,GO:0016021,GO:0030054,GO:0034220,GO:0045202,GO:0045211,GO:1902476	glycine receptor subunit beta;Smp_096480	Putative cys-loop ligand gated ion channel subunit [Source:UniProtKB/TrEMBL;Acc:G4VR43]	gi|218156328|ref|NP_001019623.2|	glycine receptor subunit alpha-4 isoform 1 precursor [Homo sapiens]
Smp_123830	80.8049	71.5112	90.257	98.0977	22.862	22.7351	24.907	23.1957	-1.86226	5e-05	0.000181778	97.048	115.423	125.543	126.222	20.5633	28.3956	21.6776	24.9917	-1.3221	8.96678e-93	3.56386e-90	54.7309	62.352	67.0348	67.0486	9.1574	14.5853	10.4316	12.2949	-1.88093	1.67696e-67	2.26762e-65	GO:0005201,GO:0005578,GO:0005581	collagen alpha (xi) chain;Smp_123830	Putative collagen alpha-1(V) chain [Source:UniProtKB/TrEMBL;Acc:G4V6X6]	gi|111118970|ref|NP_542411.2|	collagen alpha-2(XI) chain isoform 1 preproprotein [Homo sapiens]
SmVG_024109	1.75245	2.16414	1.89167	1.83297	0.895097	0.477104	0.494972	0.24065	-1.85805	0.0011	0.00310334	2.4136	1.88662	2.43817	1.94094	0.562766	0.474383	0.397677	0.192234	-1.38661	0.000327698	0.00108654	1.63734	1.16297	1.47902	1.17815	0.291509	0.281515	0.278366	0.108569	-1.91577	1.93069e-07	8.28071e-07
Smp_084090	26.1405	25.6263	23.894	26.8716	7.63364	6.46759	6.11791	8.11465	-1.85549	5e-05	0.000181778	33.1848	35.8354	32.1919	34.5218	6.77538	6.99598	5.62061	9.04407	-1.31637	3.99292e-52	4.47243e-50	19.8351	20.6002	18.3013	19.4529	3.32841	3.8789	2.95527	4.85279	-1.84388	1.55064e-51	1.08612e-49	GO:0016020,GO:0016021	hypothetical protein;Smp_084090	Putative junctophilin [Source:UniProtKB/TrEMBL;Acc:G4VRF7]	gi|21704283|ref|NP_065706.2|	junctophilin-3 [Homo sapiens]
SmVG_023332	55.4262	51.0866	37.5414	53.0892	15.722	12.4879	10.0573	16.4492	-1.8492	5e-05	0.000181778	44.3356	48.4687	33.381	42.7999	8.6252	7.87532	7.40264	11.0535	-1.25089	8.77463e-12	9.18541e-11	27.6143	29.6008	19.774	25.3129	4.38038	4.54975	4.06379	6.09614	-1.82477	7.03357e-14	6.26522e-13
SmVG_025557	6.90371	8.80658	6.28959	5.93989	2.48102	1.8867	2.44707	0.944366	-1.84835	5e-05	0.000181778	9.53684	9.64315	7.66693	6.13075	2.26303	2.64988	1.63391	1.00574	-1.24151	1.37207e-06	7.15417e-06	5.88725	5.7675	4.46241	3.535	1.08456	1.44	0.883789	0.543157	-1.73531	7.67936e-11	5.01114e-10
Smp_010770.2	46.4131	43.1984	35.5839	36.6426	12.3953	11.4738	10.3898	10.962	-1.83949	5e-05	0.000181778	54.5176	66.6647	50.038	46.1561	10.4748	12.5807	9.28426	11.8558	-1.32577	4.75142e-53	5.42058e-51	32.6991	38.5198	28.5334	26.1007	5.05923	6.88976	4.84814	6.24324	-1.89034	2.9249e-52	2.0786e-50	GO:0006629,GO:0006631,GO:0006633,GO:0016020,GO:0016021,GO:0016740	elongation of very long chain fatty acids;Smp_010770.2
Smp_146720	48.2055	37.802	35.2543	45.5062	11.7751	9.85399	14.6378	10.4117	-1.83701	5e-05	0.000181778	53.767	68.5659	56.6293	63.558	11.591	18.8322	10.1801	13.3319	-1.26665	1.73582e-30	7.5042e-29	33.0725	40.5431	33.1417	36.8073	5.7881	10.6295	5.52558	7.24033	-1.78363	8.36804e-39	3.49662e-37	GO:0005515,GO:0016020,GO:0016021	tissue type plasminogen activator;Smp_146720	Putative uncharacterized protein [Source:UniProtKB/TrEMBL;Acc:G4VK82]	_	_
Smp_136050	3.33057	3.08475	2.82903	3.2033	0.727309	0.863456	1.05433	0.840249	-1.8365	5e-05	0.000181778	6.07784	6.64134	5.81491	5.63462	0.76237	1.50774	0.918115	1.11744	-1.48975	6.2005e-33	3.05586e-31	3.56922	3.78811	3.31907	3.18472	0.384936	0.843076	0.474109	0.610045	-2.03057	2.5475e-38	1.05542e-36	GO:0005515	leucine rich repeat containing protein;note=predicted by EVM2;note=pfam_scan%3BPfam:PF12799.2%3B%3BE()%3D2.4E-7%3Bscore%3D30.1%3Bquer y 126-165%3Bdescription%3DLRR_4;note=pfam_scan%3BPfam:PF00560.28%3B%3BE()%3D0.7%3Bscore%3D10.0%3Bquery 95-115%3Bdescription%3DLRR_1;Smp_136050	Putative leucine-rich repeat-containing protein [Source:UniProtKB/TrEMBL;Acc:G4VPC7]	gi|110825984|ref|NP_004216.2|	malignant fibrous histiocytoma-amplified sequence 1 [Homo sapiens]
Smp_211180	14.8813	19.5707	13.8444	15.8609	3.77503	5.3113	4.31201	4.56838	-1.83629	5e-05	0.000181778	27.9548	22.7107	22.2741	22.5463	3.81638	5.52262	5.14232	5.31261	-1.3179	8.91474e-51	9.46883e-49	16.5024	12.8782	12.4953	12.4372	1.79932	2.9734	2.60439	2.81191	-1.86381	3.35413e-47	1.96722e-45	GO:0005794,GO:0006486,GO:0008417,GO:0016020,GO:0016021,GO:0016740,GO:0016757,GO:0018392,GO:0032580,GO:0036065	alpha(13)fucosyltransferase;Smp_211180	Alpha(1,3)fucosyltransferase,putative [Source:UniProtKB/TrEMBL;Acc:G4LWN6]	gi|4758406|ref|NP_004470.1|	alpha-(1,3)-fucosyltransferase [Homo sapiens]
Smp_154680	3.68157	3.69442	3.75561	4.29278	0.880141	1.41276	0.957645	1.06983	-1.83598	5e-05	0.000181778	5.21377	5.93238	6.33896	5.73475	0.798766	1.32296	1.34085	1.17326	-1.3464	3.5258e-14	4.66109e-13	3.42875	3.6031	3.75851	3.4992	0.461394	0.745853	0.668855	0.67128	-1.942	1.7334e-24	3.49408e-23	GO:0003829,GO:0008375,GO:0016020,GO:0016021,GO:0016740,GO:0016757	glycosyltransferase 14 family member;Smp_154680	Putative glycosyltransferase 14 family member [Source:UniProtKB/TrEMBL;Acc:G4V6I0]	gi|21717810|ref|NP_663624.1|	N-acetyllactosaminide beta-1,6-N-acetylglucosaminyl-transferase isoform A [Homo sapiens]
Smp_180840	2.19005	2.92537	1.8459	2.42037	0.47557	1.25152	0.523281	0.385684	-1.83147	0.00215	0.0056608	3.19928	2.0917	2.58572	3.37312	0.483438	0.699335	0.841995	0.328802	-1.23958	0.0018685	0.00518478	2.12113	1.9566	1.73329	2.16707	0.249992	0.410113	0.479949	0.187186	-1.99669	1.7466e-07	7.5243e-07		hypothetical protein;Smp_180840	Putative uncharacterized protein [Source:UniProtKB/TrEMBL;Acc:G4V6H4]	_	_
Smp_011680	154.92	154.026	149.96	165.614	36.1045	48.319	46.5509	44.5241	-1.83129	5e-05	0.000181778	236.693	250.229	254.463	255.181	38.8609	66.8525	50.4396	57.801	-1.2973	5.262e-79	1.47348e-76	144.319	146.77	147.482	146.381	19.118	37.5103	26.7911	30.9004	-1.8315	2.08501e-61	2.13681e-59	GO:0007155,GO:0016020,GO:0016021	CD36 class B scavenger receptor;Smp_011680	CD36-like class B scavenger receptor [Source:UniProtKB/TrEMBL;Acc:G4VSZ3]	_	_
Smp_065290	38.2664	32.1721	28.0246	28.6111	9.48882	8.31276	9.83358	8.19702	-1.82634	5e-05	0.000181778	37.2004	45.3127	35.0049	33.0835	6.91381	9.97881	6.50657	7.74476	-1.31881	1.3487e-50	1.40825e-48	23.378	27.4195	20.889	19.6089	3.57663	5.75902	3.64499	4.34777	-1.86025	2.38829e-52	1.7224e-50	GO:0000166,GO:0004672,GO:0004674,GO:0004683,GO:0005524,GO:0006468,GO:0016301,GO:0016310,GO:0016740,GO:0016772	calcium:calmodulin dependent protein kinase I;Smp_065290	Putative calcium/calmodulin-dependent protein kinase [Source:UniProtKB/TrEMBL;Acc:G4VCT2]	gi|83776596|ref|NP_076951.2|	caM kinase-like vesicle-associated protein [Homo sapiens]
Smp_159760	4.13543	3.15531	3.14542	3.08388	0.723784	1.01814	1.01271	1.06639	-1.82307	5e-05	0.000181778	3.84777	5.57746	4.24218	3.91737	0.528388	1.03499	0.841236	1.04341	-1.3801	1.03903e-19	2.25385e-18	2.46937	3.47603	2.63154	2.39742	0.265945	0.612573	0.491814	0.591065	-1.94792	7.04534e-22	1.1626e-20	GO:0005789,GO:0005887,GO:0008521,GO:0015295,GO:0015876,GO:0015992,GO:0016020,GO:0016021	solute carrier family 33;Smp_159760	Putative solute carrier family 33 (Acetyl-CoA transporter) [Source:UniProtKB/TrEMBL;Acc:G4V7N3]	gi|300360496|ref|NP_001177921.1|	acetyl-coenzyme A transporter 1 [Homo sapiens]
Smp_020080	18.507	23.2904	16.5302	17.0807	5.0938	5.32203	5.43256	5.46981	-1.82264	5e-05	0.000181778	39.0905	34.4754	33.0252	31.969	5.54257	8.92262	6.4672	9.05547	-1.28206	1.65967e-49	1.68998e-47	24.3546	20.5541	19.6802	18.8566	2.82998	5.19977	3.5988	5.09748	-1.80302	1.6224e-43	8.35751e-42	GO:0000166,GO:0001664,GO:0003924,GO:0004871,GO:0005525,GO:0005834,GO:0006184,GO:0007165,GO:0007186,GO:0007188,GO:0019001,GO:0031683	GTP binding protein (I) alpha subunit alpha;Smp_020080	Putative gtp-binding protein (I) alpha-1subunit, gnai1 [Source:UniProtKB/TrEMBL;Acc:G4V8F6]	gi|4504051|ref|NP_002064.1|	guanine nucleotide-binding protein G(z) subunit alpha [Homo sapiens]
Smp_205400	6.40304	2.88772	2.53699	4.75526	1.71269	1.02157	1.04578	0.912894	-1.82115	5e-05	0.000181778	3.17988	7.53334	3.64292	5.57942	1.04947	1.13798	0.964851	1.07213	-1.18065	1.06104e-05	4.75093e-05	2.32235	5.41162	2.54401	3.5771	0.701622	0.835443	0.523983	0.661342	-1.77746	6.70163e-07	2.63944e-06	GO:0005515	partitioning defective 3;note=iprscan%3BInterPro:IPR001478 : PDZ/DHR/GLGF%3BPfam:PF00595%3B%3Bscore%3D8.9E-7%3Bquery 253-315%3Bdescription%3DPDZ/DHR/GLGF;Smp_205400
Smp_125250	47.8486	72.1343	48.8971	55.0055	11.3648	21.4329	11.2688	19.4175	-1.8183	5e-05	0.000181778	76.8709	54.2926	57.1222	57.7337	8.61729	11.3042	16.1456	18.1155	-1.2762	2.66989e-12	2.96892e-11	47.8419	32.5435	34.0729	33.7764	4.46891	6.68103	9.17711	10.292	-1.74243	9.56157e-16	1.01186e-14	GO:0016020,GO:0016021	hypothetical protein;note=tmhmm%3B%3Bquery 1-130%3B;note=%3Bquery 28-130%3B;note=%3Bquery 5-27%3B;note=%3Bquery 1-4%3B;Smp_125250	Putative uncharacterized protein [Source:UniProtKB/TrEMBL;Acc:G4V736]	_	_
Smp_155050	25.8419	25.0817	20.5904	24.9999	6.79897	6.01695	7.81945	6.85461	-1.81183	5e-05	0.000181778	25.8385	28.8095	22.5708	25.9788	4.11927	6.5006	3.11366	4.75544	-1.49122	2.13786e-30	9.1144e-29	16.1219	17.1099	13.7857	15.3606	2.38903	4.07854	2.28356	3.19744	-1.87395	4.93795e-57	4.21718e-55	GO:0005515	agrin;Smp_155050	Agrin, putative [Source:UniProtKB/TrEMBL;Acc:G4LY67]	gi|54873613|ref|NP_940978.2|	agrin precursor [Homo sapiens]
Smp_105340	3.2534	2.26447	2.23272	2.96311	0.719877	0.706877	0.984453	0.644649	-1.80981	5e-05	0.000181778	2.98019	4.6528	3.34646	3.92646	0.613207	1.26321	0.592264	0.720032	-1.31097	2.20225e-15	3.26128e-14	1.72966	2.66549	1.88287	2.15202	0.279446	0.680532	0.305339	0.35282	-1.85288	3.27147e-16	3.61123e-15	GO:0005216,GO:0005249,GO:0005887,GO:0006810,GO:0006811,GO:0016020,GO:0016021,GO:0034220,GO:0042391,GO:0055085,GO:0071805	cyclic nucleotide gated cation channel alpha 3;Smp_105340	Putative cyclic nucleotide-gated ion channel [Source:UniProtKB/TrEMBL;Acc:G4V5E0]	gi|38327037|ref|NP_065948.1|	potassium/sodium hyperpolarization-activated cyclic nucleotide-gated channel 3 [Homo sapiens]
Smp_161220	27.2345	35.4475	28.0086	30.1883	8.61467	8.96006	8.12781	8.9362	-1.8031	5e-05	0.000181778	43.1772	37.7766	39.2741	37.2026	7.31987	9.83552	7.3691	9.44952	-1.266	6.80951e-38	4.51075e-36	27.5293	23.1076	23.9159	22.4606	3.88054	5.88857	4.32105	5.54041	-1.79068	1.97066e-41	9.18006e-40	GO:0005783,GO:0009058,GO:0016020,GO:0016021,GO:0016788,GO:0016844	adipocyte plasma membrane associated protein;Smp_161220	Strictosidine synthase-related [Source:UniProtKB/TrEMBL;Acc:G4VCY0]	gi|24308201|ref|NP_065392.1|	adipocyte plasma membrane-associated protein [Homo sapiens]
Smp_001000	65.3042	65.0284	46.4357	52.4616	18.8769	13.6887	17.6364	15.7101	-1.79818	5e-05	0.000181778	54.5084	58.4516	44.0037	44.4427	11.2471	12.7922	7.57439	10.7166	-1.28488	1.96166e-25	6.10343e-24	35.375	37.031	27.1729	27.4919	5.57883	7.58226	3.77629	6.35952	-1.87816	3.65822e-25	7.57796e-24	GO:0006950	universal stress protein;Smp_001000	Putative uncharacterized protein [Source:UniProtKB/TrEMBL;Acc:G4V5S2]	_	_
SmVG_031576	3.91382	5.50443	5.35717	5.95631	1.64104	1.47584	1.22548	1.61992	-1.7979	5e-05	0.000181778	5.16339	4.02439	5.71028	5.74147	0.949075	1.13741	1.13762	1.63133	-1.18965	9.61523e-19	1.93894e-17	3.20344	2.39515	3.33376	3.21533	0.529606	0.645994	0.648768	0.913918	-1.60274	5.58308e-16	6.01958e-15	GO:0005875,GO:0007017
Smp_135420	10.0018	8.45858	9.87674	10.7054	2.40279	2.53583	3.40613	2.90518	-1.79513	5e-05	0.000181778	10.4823	12.5163	13.0959	13.2927	2.16335	3.79647	2.61624	3.2743	-1.18537	6.1364e-48	5.6847e-46	6.41201	7.38005	7.65963	7.65529	1.07027	2.13127	1.40189	1.77376	-1.67694	3.18687e-43	1.61601e-41		hypothetical protein;note=predicted by EVM2;Smp_135420	Putative uncharacterized protein [Source:UniProtKB/TrEMBL;Acc:G4VQH3]	_	_
Smp_015670	29.2286	30.4184	27.6878	28.633	8.7603	7.07926	9.31035	8.2973	-1.79377	5e-05	0.000181778	28.7003	29.3346	30.0447	27.3841	5.5488	7.791	4.53289	6.93943	-1.28533	2.92819e-35	1.63992e-33	17.4798	17.296	17.3682	15.7572	2.67411	4.39563	2.33002	3.57672	-1.80642	1.48237e-39	6.41439e-38	GO:0046983	transcription factor 15;Smp_015670	Putative paraxis [Source:UniProtKB/TrEMBL;Acc:G4VSK8]	gi|148922889|ref|NP_001073983.1|	basic helix-loop-helix transcription factor scleraxis [Homo sapiens]
SmVG_023390	2.05525	2.90026	3.57889	3.5434	0.950225	0.872204	1.02107	0.655003	-1.78755	0.00995	0.021913	4.62019	3.7649	5.63851	5.42865	0.90835	1.31217	0.886543	1.01003	-1.26119	2.53278e-09	1.97134e-08	2.95846	2.25623	3.50155	3.24696	0.515871	0.709261	0.517314	0.580957	-1.83697	2.13911e-13	1.82688e-12
Smp_151630	8.36342	4.75906	2.9892	3.8878	2.614	0.693022	1.57528	0.913415	-1.7869	5e-05	0.000181778	4.54811	8.55869	2.99987	3.76288	1.64321	1.25717	0.511919	0.990278	-1.20636	0.000279906	0.000940988	3.17195	5.62366	2.02874	2.36948	0.865201	0.786624	0.293649	0.493748	-1.85546	5.80661e-06	1.97738e-05	GO:0005509,GO:0005886,GO:0007155,GO:0007156,GO:0016020	protocadherin alpha;Smp_151630	Putative protocadherin alpha [Source:UniProtKB/TrEMBL;Acc:G4V5M9]	_	_
Smp_133430	1.10857	2.74249	2.25887	3.2682	0.240055	0.510822	1.19019	0.781514	-1.78432	0.0023	0.00601757	5.71919	5.37163	8.66577	7.34993	0.165527	1.55702	2.07338	1.35062	-1.60033	0.00127145	0.00368688	4.16009	3.94358	5.64989	4.83021	0.179191	1.08429	1.22915	1.26965	-1.77478	1.77904e-08	8.74345e-08	GO:0016020,GO:0016021	hypothetical protein;note=tmhmm%3B%3Bquery 1-169%3B;note=%3Bquery 1-32%3B;note=%3Bquery 33-50%3B;note=%3Bquery 51-169%3B;Smp_133430	Putative uncharacterized protein [Source:UniProtKB/TrEMBL;Acc:G4LYB1]	_	_
SmVG_007747:Smp_037510	5.09539	4.42106	4.37068	3.98496	1.59623	1.28519	1.30471	1.00265	-1.78424	5e-05	0.000181778	4.20313	5.53766	4.84276	4.12707	1.11652	1.10547	0.839714	0.829844	-1.30374	7.59964e-20	1.67505e-18	2.64674	3.35812	3.01628	2.47391	0.625384	0.737351	0.482927	0.50841	-1.72361	6.00344e-21	9.35193e-20		innexin unc 9;Smp_037510	Putative innexin [Source:UniProtKB/TrEMBL;Acc:G4VE57]	_	_
SmVG_007747:Smp_142390	5.09539	4.42106	4.37068	3.98496	1.59623	1.28519	1.30471	1.00265	-1.78424	5e-05	0.000181778	4.20313	5.53766	4.84276	4.12707	1.11652	1.10547	0.839714	0.829844	-1.30374	7.59964e-20	1.67505e-18	2.64674	3.35812	3.01628	2.47391	0.625384	0.737351	0.482927	0.50841	-1.72361	6.00344e-21	9.35193e-20		innexin unc 9;Smp_142390	Putative innexin [Source:UniProtKB/TrEMBL;Acc:G4VE56]	_	_
Smp_170110	60.2602	40.5827	32.9471	45.5017	14.4025	7.76246	20.3275	9.59182	-1.78339	5e-05	0.000181778	47.6665	72.9738	40.0841	51.3348	11.2431	20.2717	6.04417	9.25323	-1.31823	4.43227e-07	2.50283e-06	29.4532	43.7317	24.0441	30.4807	5.77268	11.8022	3.4056	5.10366	-1.78944	1.49166e-10	9.38774e-10	GO:0003676,GO:0003723	high density lipoprotein binding protein;Smp_170110	High-density lipoprotein receptor (Hdl) [Source:UniProtKB/TrEMBL;Acc:G4LXW3]	gi|42716280|ref|NP_976221.1|	vigilin [Homo sapiens]
Smp_089200	38.2511	40.8643	51.0577	47.8065	11.0455	14.6794	11.9704	14.0705	-1.78164	5e-05	0.000181778	51.9819	52.0845	71.168	59.425	8.9655	12.9375	12.078	14.0357	-1.33057	1.31692e-60	1.93164e-58	31.2678	29.9513	40.4351	33.3137	4.42594	7.3282	6.46572	7.46775	-1.83779	1.55234e-47	9.32936e-46	GO:0000166,GO:0005524,GO:0006200,GO:0006810,GO:0006855,GO:0008559,GO:0016020,GO:0016021,GO:0016787,GO:0016887,GO:0017111,GO:0042626,GO:0042908,GO:0055085	multidrug resistance protein;Smp_089200	Putative multidrug resistance protein 1, 2, 3 (P glycoprotein 1, 2, 3) [Source:UniProtKB/TrEMBL;Acc:G4VAB0]	gi|255708477|ref|NP_001157413.1|	ATP-binding cassette sub-family B member 5 isoform 1 [Homo sapiens]
Smp_017520	4.88385	4.73681	4.23659	4.06327	1.08629	1.34018	1.28393	1.53333	-1.77295	5e-05	0.000181778	8.16741	9.27742	7.89561	7.06487	1.52003	2.10395	1.6267	1.87506	-1.25496	2.53384e-36	1.5155e-34	5.09249	5.56201	4.63664	4.18819	0.695019	1.14084	0.8296	1.0015	-1.87859	9.26502e-42	4.40021e-40	GO:0000287,GO:0004441,GO:0005737,GO:0007165,GO:0046854,GO:0046855	inositol polyphosphate 1 phosphatase;Smp_017520	Putative uncharacterized protein [Source:UniProtKB/TrEMBL;Acc:G4LW64]	gi|193083155|ref|NP_001122400.1|	inositol polyphosphate 1-phosphatase [Homo sapiens]
SmVG_029659:Smp_041970	3.67271	3.61561	3.51902	4.05151	1.45808	1.30446	0.747369	0.838697	-1.7727	5e-05	0.000181778	4.00771	4.50907	5.03558	4.99825	1.46009	1.08385	1.47791	1.03173	-1.04025	9.07012e-10	7.48011e-09	2.83576	2.96779	3.17179	3.12339	0.814286	0.680649	0.900591	0.634634	-1.40498	5.05821e-11	3.38931e-10		SPFH domain : Band 7 family protein;Smp_041970
SmVG_029659:Smp_061140	3.67271	3.61561	3.51902	4.05151	1.45808	1.30446	0.747369	0.838697	-1.7727	5e-05	0.000181778	4.00771	4.50907	5.03558	4.99825	1.46009	1.08385	1.47791	1.03173	-1.04025	9.07012e-10	7.48011e-09	2.83576	2.96779	3.17179	3.12339	0.814286	0.680649	0.900591	0.634634	-1.40498	5.05821e-11	3.38931e-10		mechanosensory protein 2;Smp_061140	SPFH domain / Band 7 family protein,putative [Source:UniProtKB/TrEMBL;Acc:G4LY54]	gi|7657615|ref|NP_055440.1|	podocin [Homo sapiens]
SmVG_029659:Smp_154990	3.67271	3.61561	3.51902	4.05151	1.45808	1.30446	0.747369	0.838697	-1.7727	5e-05	0.000181778	4.00771	4.50907	5.03558	4.99825	1.46009	1.08385	1.47791	1.03173	-1.04025	9.07012e-10	7.48011e-09	2.83576	2.96779	3.17179	3.12339	0.814286	0.680649	0.900591	0.634634	-1.40498	5.05821e-11	3.38931e-10		mechanosensory protein 2;note=iprscan%3BPANTHER:PTHR10264%3B%3Bscore%3D2.2E-13%3Bquery 2-61%3Bdescription%3Dnull;Smp_154990	SPFH domain / Band 7 family protein,putative [Source:UniProtKB/TrEMBL;Acc:G4LY52]	gi|7657615|ref|NP_055440.1|	podocin [Homo sapiens]
Smp_149740	29.6032	25.9652	34.5184	33.1832	8.37807	9.77374	9.18054	8.80194	-1.77038	5e-05	0.000181778	33.5632	41.281	46.6981	41.336	7.32603	10.3371	7.79205	9.41307	-1.28321	1.14318e-81	3.52129e-79	20.185	23.6996	26.5532	23.3595	3.6168	5.73014	4.06888	5.0087	-1.79606	2.01952e-68	2.80887e-66	GO:0008201,GO:0016020,GO:0016021	alzheimer's disease beta amyloid;Smp_149740	Alzheimer's disease beta-amyloid related [Source:UniProtKB/TrEMBL;Acc:G4LY13]	gi|41406057|ref|NP_958817.1|	amyloid beta A4 protein isoform c precursor [Homo sapiens]
Smp_152630	7.01746	5.60706	8.54489	8.47085	1.70407	2.39029	1.66171	2.94356	-1.76853	5e-05	0.000181778	38.5741	36.3126	34.7566	32.409	2.67514	3.87382	3.04498	4.74685	-2.04271	1.51671e-79	4.3459e-77	23.3554	21.2144	20.0452	18.5792	1.34914	2.10958	1.63832	2.47747	-2.91607	1.81136e-86	4.30132e-84		no description by SANGER curators;Smp_152630.2	MEG-12 [Source:UniProtKB/TrEMBL;Acc:G4LYC5]	_	_
Smp_147890	3.68872	4.36303	3.82903	4.87261	1.16361	1.06347	1.20926	1.4975	-1.76367	5e-05	0.000181778	5.94354	5.3426	5.43296	6.3617	1.08383	1.43533	1.07532	1.79264	-1.2129	1.6047e-31	7.35e-30	3.61209	3.11665	3.14441	3.65755	0.533876	0.831461	0.582245	0.983452	-1.69877	2.34454e-25	4.91948e-24	GO:0035253,GO:0051297	Rootletin;Smp_147890	Putative rootletin (Ciliary rootlet coiled-coil protein) [Source:UniProtKB/TrEMBL;Acc:G4V8V0]	gi|153791497|ref|NP_055490.3|	rootletin [Homo sapiens]
Smp_095360	1356.5	1608.24	1422.46	1552.54	405.927	494.583	398.798	453.007	-1.76114	5e-05	0.000181778	2459.07	2235.42	2309.22	2367.17	414.471	524.68	512.227	533.846	-1.27571	6.53984e-71	1.52033e-68	1539.39	1339.31	1371.63	1385.49	207.181	298.837	278.011	293.536	-1.80459	7.21291e-54	5.48632e-52	GO:0005215,GO:0005737,GO:0006810,GO:0008289	fatty acid binding protein;Smp_095360	14 kDa fatty acid-binding protein [Source:UniProtKB/Swiss-Prot;Acc:P29498]	gi|4758052|ref|NP_004369.1|	cellular retinoic acid-binding protein 1 [Homo sapiens]
Smp_123350	5.70757	5.58357	4.902	5.79014	1.90881	1.25659	1.84258	1.49234	-1.75782	5e-05	0.000181778	6.02689	7.04221	6.19179	6.49514	1.39351	2.05249	1.25249	1.54746	-1.15509	1.07404e-12	1.2379e-11	3.93885	4.36684	3.78731	4.02209	0.776626	1.26738	0.72545	0.944352	-1.58999	5.41404e-19	7.35162e-18	GO:0004930,GO:0005887,GO:0007186,GO:0007200,GO:0007218,GO:0008528,GO:0016020,GO:0016021	galanin receptor type 2;Smp_123350	Putative g-protein coupled receptor [Source:UniProtKB/TrEMBL;Acc:G4VBL0]	_	_
Smp_197450	15.4126	10.9778	10.3691	13.2869	3.117	3.81022	4.52337	3.3759	-1.75509	5e-05	0.000181778	14.1797	21.2594	14.8925	16.9424	2.83011	4.95976	3.1953	3.52872	-1.27952	3.88333e-26	1.26244e-24	9.19621	12.9685	9.05332	10.2138	1.47793	2.86373	1.81072	2.04889	-1.8038	1.31489e-29	3.56595e-28	GO:0005622,GO:0006810,GO:0046872	phosphatidylinositol transfer protein;Smp_197450
Smp_152680	1.93705	1.55282	1.6847	2.12698	0.521655	0.668253	0.271996	0.701781	-1.75471	5e-05	0.000181778	1.59714	2.11375	1.94101	2.12726	0.356775	0.26812	0.466018	0.582952	-1.30056	2.00548e-11	2.02703e-10	1.01409	1.27093	1.17044	1.29735	0.192159	0.150205	0.270516	0.334603	-1.81548	4.70237e-13	3.87329e-12	GO:0000166,GO:0004672,GO:0004713,GO:0004714,GO:0005524,GO:0006468,GO:0007169,GO:0016020,GO:0016021,GO:0016301,GO:0016310,GO:0016740,GO:0016772,GO:0018108	epidermal growth factor receptor;Smp_152680	Receptor Tyrosine Kinase,putative [Source:UniProtKB/TrEMBL;Acc:G4M1E6]	gi|29725609|ref|NP_005219.2|	epidermal growth factor receptor isoform a precursor [Homo sapiens]
Smp_062760	11.8015	9.87834	9.07638	9.12315	3.50991	2.87387	3.48966	1.94742	-1.75431	5e-05	0.000181778	13.1536	15.5948	13.0352	11.4924	2.73513	4.40528	2.36874	2.37118	-1.26288	3.5881e-19	7.46773e-18	8.56993	9.85535	8.17178	7.02441	1.52626	2.67828	1.33643	1.38191	-1.73968	1.01163e-20	1.55842e-19	GO:0005096,GO:0005737,GO:0005886,GO:0038032,GO:0043547	regulator of G protein signaling 3;Smp_062760	Putative regulator of G protein signaling [Source:UniProtKB/TrEMBL;Acc:G4VSE6]	gi|114155127|ref|NP_652759.3|	regulator of G-protein signaling 3 isoform 6 [Homo sapiens]
Smp_141510	6.68312	5.84958	5.09836	5.06548	1.49064	1.28324	2.26106	1.70292	-1.75211	5e-05	0.000181778	6.92876	8.12887	7.09512	6.55645	1.83774	2.65471	1.68727	2.02404	-1.00056	2.96262e-20	6.77226e-19	4.19617	4.88585	4.17238	3.78231	0.846268	1.4204	0.924845	1.07019	-1.46923	1.96303e-24	3.94877e-23	GO:0005249,GO:0005515,GO:0005615,GO:0006813,GO:0008076,GO:0016787,GO:0050253,GO:0051260,GO:0052689,GO:0071805,GO:0080030,GO:0080031,GO:0080032	family S9 non peptidase ue (S09 family);Smp_141510	Family S9 non-peptidase homologue (S09 family) [Source:UniProtKB/TrEMBL;Acc:G4VMF3]	gi|4557351|ref|NP_000046.1|	cholinesterase precursor [Homo sapiens]
Smp_028490	16.6704	18.2439	16.2651	18.1898	4.20291	5.25502	6.77992	4.38579	-1.75	5e-05	0.000181778	41.1246	39.7926	40.4403	41.6077	7.57203	15.9044	9.88436	9.54219	-1.10457	8.90272e-20	1.94832e-18	25.4395	23.435	23.6977	24.1726	3.7899	9.05352	5.46571	5.31501	-1.51255	9.99924e-24	1.87939e-22	GO:0003841,GO:0008152,GO:0016020,GO:0016021,GO:0016740,GO:0016746	1 acyl sn glycerol 3 phosphate acyltransferase;Smp_028490	1-acyl-sn-glycerol-3-phosphate acyltransferase epsilon [Source:UniProtKB/TrEMBL;Acc:G4LX07]	gi|61743952|ref|NP_060831.2|	1-acyl-sn-glycerol-3-phosphate acyltransferase epsilon [Homo sapiens]
Smp_192780	17.7885	16.683	17.3731	14.5737	4.27573	6.29348	5.34148	3.91539	-1.74418	5e-05	0.000181778	14.277	16.7484	16.6647	11.8526	2.33731	3.88984	3.43842	2.72859	-1.25011	2.94493e-07	1.70642e-06	9.7103	11.062	10.717	7.67039	1.28969	2.41165	1.87754	1.64962	-1.78956	2.04147e-11	1.43819e-10	GO:0016020,GO:0016021	hypothetical protein;note=tmhmm%3B%3Bquery 1-76%3B;note=%3Bquery 29-76%3B;note=%3Bquery 10-28%3B;note=%3Bquery 1-9%3B;Smp_192780	Putative uncharacterized protein [Source:UniProtKB/TrEMBL;Acc:G4VGH7]	_	_
SmVG_024384:Smp_077330	6.85756	4.17904	3.3312	4.54976	1.53328	1.08289	1.73842	1.29318	-1.74398	5e-05	0.000181778	5.96362	10.298	5.08635	6.34337	1.40052	2.14235	1.00852	1.49782	-1.25687	1.87687e-10	1.69786e-09	3.60615	5.97649	2.8884	3.59111	0.686195	1.18825	0.527725	0.809473	-1.80115	1.99075e-13	1.70616e-12		hypothetical protein;Smp_077330	Putative uncharacterized protein [Source:UniProtKB/TrEMBL;Acc:G4VTM9]	_	_
SmVG_024384:Smp_163810	6.85756	4.17904	3.3312	4.54976	1.53328	1.08289	1.73842	1.29318	-1.74398	5e-05	0.000181778	5.96362	10.298	5.08635	6.34337	1.40052	2.14235	1.00852	1.49782	-1.25687	1.87687e-10	1.69786e-09	3.60615	5.97649	2.8884	3.59111	0.686195	1.18825	0.527725	0.809473	-1.80115	1.99075e-13	1.70616e-12		laminin gamma 1 chain;Smp_163810	Putative laminin gamma-1 chain [Source:UniProtKB/TrEMBL;Acc:G4VTM7]	gi|38788416|ref|NP_005550.2|	laminin subunit alpha-1 precursor [Homo sapiens]
SmVG_024384:Smp_187680	6.85756	4.17904	3.3312	4.54976	1.53328	1.08289	1.73842	1.29318	-1.74398	5e-05	0.000181778	5.96362	10.298	5.08635	6.34337	1.40052	2.14235	1.00852	1.49782	-1.25687	1.87687e-10	1.69786e-09	3.60615	5.97649	2.8884	3.59111	0.686195	1.18825	0.527725	0.809473	-1.80115	1.99075e-13	1.70616e-12		hypothetical protein;note=tmhmm%3B%3Bquery 1-105%3B;note=%3Bquery 87-105%3B;note=%3Bquery 64-86%3B;note=%3Bquery 1-63%3B;Smp_187680	Putative uncharacterized protein [Source:UniProtKB/TrEMBL;Acc:G4VTM8]	_	_
Smp_139200	7.72709	4.68887	4.73395	5.01264	1.97184	1.32573	2.21454	1.11401	-1.74189	5e-05	0.000181778	4.52472	8.04811	5.32959	5.01218	1.23585	1.99237	0.890541	1.03915	-1.25084	1.30687e-10	1.20704e-09	2.95897	4.95469	3.28756	3.08633	0.677546	1.20243	0.531175	0.618993	-1.71324	8.54812e-14	7.57275e-13	GO:0003677,GO:0003700,GO:0003707,GO:0005634,GO:0006351,GO:0006355,GO:0008270,GO:0043401,GO:0043565,GO:0046872	nuclear receptor subfamily 4 group A member;Smp_139200	Nuclear hormone receptor nor-1/nor-2, putative [Source:UniProtKB/TrEMBL;Acc:G4LUU7]	_	_
Smp_064460	4.90952	4.92163	3.77018	4.88071	1.05503	2.49742	1.14692	0.842569	-1.73766	5e-05	0.000181778	4.6665	4.90156	4.04359	4.5954	0.711807	1.02741	1.567	0.733419	-1.28331	2.08181e-09	1.63898e-08	2.96444	2.97803	2.50294	2.7894	0.447524	0.656872	0.919129	0.518538	-1.60641	8.38477e-13	6.71886e-12		hypothetical protein;note=predicted by EVM2;Smp_064460	Putative uncharacterized protein [Source:UniProtKB/TrEMBL;Acc:G4VKC2]	_	_
Smp_098710	82.6525	76.67	74.4204	85.2425	22.7781	22.9672	28.5879	21.7908	-1.73052	5e-05	0.000181778	104.687	119.888	112.111	116.559	22.084	34.0736	22.1342	25.1404	-1.23042	1.02517e-62	1.662e-60	63.8384	69.899	64.7085	66.9528	10.8288	19.1391	11.7981	13.4517	-1.73693	1.21149e-58	1.09214e-56	GO:0003756,GO:0005615,GO:0006457,GO:0016020,GO:0016021,GO:0016491,GO:0016971,GO:0016972,GO:0030173,GO:0055114	quiescin q6 sulfhydryl oxidase;Smp_098710	Quiescin q6-related sulfhydryl oxidase [Source:UniProtKB/TrEMBL;Acc:G4M193]	gi|13325075|ref|NP_002817.2|	sulfhydryl oxidase 1 isoform a [Homo sapiens]
SmVG_025529	102.957	106.226	113.408	108.165	29.3262	35.0985	34.5041	30.9307	-1.72992	5e-05	0.000181778	62.8619	57.8142	82.462	63.1114	10.3385	14.4531	14.6262	16.0937	-1.30915	2.18861e-49	2.21032e-47	53.6589	52.4091	62.1023	51.069	8.30345	14.5842	10.8535	12.2475	-1.74113	2.72346e-69	4.14306e-67
Smp_200110	7.13528	8.10441	4.06422	5.27252	1.00869	1.94959	1.73932	2.71533	-1.72916	5e-05	0.000181778	9.39842	9.20737	5.03408	7.28205	0.69114	2.24807	1.57896	2.70985	-1.24077	1.73794e-05	7.44286e-05	6.07343	5.78467	3.09632	4.46808	0.369768	1.33682	0.91403	1.56279	-1.69569	7.82727e-08	3.56771e-07		hypothetical protein;Smp_200110
Smp_031190	9.46796	9.40737	6.06891	7.10832	2.31663	2.76972	2.66504	1.91999	-1.72864	5e-05	0.000181778	14.5473	15.9506	10.5905	11.477	2.61662	3.09633	2.48644	2.82601	-1.28177	8.27653e-28	3.03498e-26	8.95792	9.41366	6.13636	6.63581	1.30728	1.74145	1.35373	1.46698	-1.8609	7.57103e-23	1.33294e-21	GO:0006629,GO:0008374,GO:0016740,GO:0016746	phospholipase A;Smp_031190	Phosphatidylcholine-sterol acyltransferase (Lecithin-cholesterol acyltransferase)/ Phospholipase A [Source:UniProtKB/TrEMBL;Acc:G4VPL3]	gi|6912484|ref|NP_036452.1|	group XV phospholipase A2 precursor [Homo sapiens]
SmVG_034311:Smp_165480	5.10034	6.28539	6.86595	9.02678	1.83415	3.35881	1.35656	1.68571	-1.72788	5e-05	0.000181778	9.50951	9.98833	11.5874	13.8078	1.5754	1.74942	2.5599	1.95481	-1.48008	2.67133e-20	6.12914e-19	5.84705	5.88466	6.72884	7.97728	0.778941	0.985028	1.35737	1.05154	-2.12078	6.35776e-22	1.0545e-20		hypothetical protein;Smp_165480	C4b-binding protein beta chain, putative [Source:UniProtKB/TrEMBL;Acc:C1LZY8]	gi|148886654|ref|NP_699197.3|	sushi, von Willebrand factor type A, EGF and pentraxin domain-containing protein 1 [Homo sapiens]
SmVG_034311:Smp_192300	5.10034	6.28539	6.86595	9.02678	1.83415	3.35881	1.35656	1.68571	-1.72788	5e-05	0.000181778	9.50951	9.98833	11.5874	13.8078	1.5754	1.74942	2.5599	1.95481	-1.48008	2.67133e-20	6.12914e-19	5.84705	5.88466	6.72884	7.97728	0.778941	0.985028	1.35737	1.05154	-2.12078	6.35776e-22	1.0545e-20		amphibian RCA protein 2;note=pfam_scan%3BPfam:PF00084.15%3B%3BE()%3D3.9E-4%3Bscore%3D20.5%3Bque ry 34-95%3Bdescription%3DSushi;note=iprscan%3BInterPro:IPR000436 : Sushi/SCR/CCP%3BPfam:PF00084%3B%3Bscore%3D2.1E-6%3Bquery 31-95%3Bdescription%3DSushi/SCR/CCP;Smp_192300	Putative uncharacterized protein [Source:UniProtKB/TrEMBL;Acc:C4QTP2]	_	_
Smp_083220	10.6027	5.79285	5.03928	6.98	2.07503	1.53232	3.53093	1.44558	-1.72694	5e-05	0.000181778	5.77372	11.5488	5.80273	7.04377	1.38885	3.13936	1.0326	1.48953	-1.22246	1.25115e-06	6.55973e-06	4.02474	7.58253	3.94195	4.7321	0.76471	1.89943	0.589807	0.867771	-1.78731	4.51393e-09	2.40151e-08	GO:0005509,GO:0005886,GO:0007155,GO:0007156,GO:0016020,GO:0016021	protocadherin gamma;Smp_083220	Putative protocadherin alpha [Source:UniProtKB/TrEMBL;Acc:G4V7F7]	gi|9256600|ref|NP_061722.1|	protocadherin alpha-C2 isoform 1 precursor [Homo sapiens]
SmVG_014647:Smp_161630	6.25064	5.01728	6.04046	6.13469	1.41755	2.00695	1.575	2.09668	-1.72405	5e-05	0.000181778	7.33349	10.0377	9.80632	9.33101	1.33478	2.08408	2.23175	2.49215	-1.25853	1.24891e-25	3.9456e-24	4.85484	6.38111	6.028	5.7296	1.3027	1.66003	1.59114	1.68352	-1.34467	1.20059e-27	2.87904e-26		transient receptor potential cation channel;Smp_161630	_	_	_
SmVG_014647:Smp_161640	6.25064	5.01728	6.04046	6.13469	1.41755	2.00695	1.575	2.09668	-1.72405	5e-05	0.000181778	7.33349	10.0377	9.80632	9.33101	1.33478	2.08408	2.23175	2.49215	-1.25853	1.24891e-25	3.9456e-24	4.85484	6.38111	6.028	5.7296	1.3027	1.66003	1.59114	1.68352	-1.34467	1.20059e-27	2.87904e-26		transient receptor potential cation channel;Smp_161640	Transient receptor potential cation channel,subfamily m, member, putative [Source:UniProtKB/TrEMBL;Acc:G4LW05]	gi|154091314|ref|NP_001007472.2|	transient receptor potential cation channel subfamily M member 3 isoform k [Homo sapiens]
Smp_194720	4.73397	4.90422	5.01308	4.31853	1.40613	1.4517	1.3124	1.57188	-1.72405	5e-05	0.000181778	11.4238	12.2509	11.0402	10.8496	1.98992	2.89128	1.91999	2.3298	-1.35699	1.08985e-48	1.04907e-46	7.43945	7.58643	6.75942	6.66429	1.01248	1.72144	1.12703	1.41636	-1.88826	6.56455e-56	5.23873e-54	GO:0005737,GO:0007165	hypothetical protein;Smp_194720	Family S33 non-peptidase homologue (S33 family) [Source:UniProtKB/TrEMBL;Acc:G4VGD5]	gi|32130514|ref|NP_071922.2|	protein NDRG3 isoform b [Homo sapiens]
SmVG_014647:Smp_197680	6.25064	5.01728	6.04046	6.13469	1.41755	2.00695	1.575	2.09668	-1.72405	5e-05	0.000181778	7.33349	10.0377	9.80632	9.33101	1.33478	2.08408	2.23175	2.49215	-1.25853	1.24891e-25	3.9456e-24	4.85484	6.38111	6.028	5.7296	1.3027	1.66003	1.59114	1.68352	-1.34467	1.20059e-27	2.87904e-26		transient receptor potential cation channel;Smp_197680	Transient receptor potential cation channel,subfamily m, member, putative [Source:UniProtKB/TrEMBL;Acc:G4LW03]	gi|154091314|ref|NP_001007472.2|	transient receptor potential cation channel subfamily M member 3 isoform k [Homo sapiens]
Smp_171020	51.4604	46.5292	50.7864	57.8477	14.9144	16.4886	17.6411	13.5043	-1.72396	5e-05	0.000181778	54.2314	68.8175	64.4942	69.6439	10.9956	17.9157	11.5546	12.453	-1.33491	1.06103e-43	8.60063e-42	35.3045	42.817	40.0218	42.4558	6.02547	10.9435	6.82827	7.4318	-1.8466	5.1428e-51	3.4771e-49	GO:0005509,GO:0016020,GO:0016021	calsyntenin;Smp_171020	Putative uncharacterized protein [Source:UniProtKB/TrEMBL;Acc:G4V5T7]	gi|209364544|ref|NP_071414.2|	calsyntenin-2 precursor [Homo sapiens]
Smp_136070	5.67303	3.01662	3.37936	3.99767	1.12568	0.692749	1.75661	1.29425	-1.72229	5e-05	0.000181778	4.06721	7.81295	4.96615	4.66297	0.679382	1.19219	0.513963	1.39201	-1.47701	1.33599e-09	1.07657e-08	3.01762	5.72143	3.47477	3.28039	0.434167	0.986212	0.36474	0.824844	-2.02793	3.18162e-11	2.18143e-10	GO:0016020,GO:0016021	hypothetical protein;Smp_136070	Putative uncharacterized protein [Source:UniProtKB/TrEMBL;Acc:G4VPC0]	_	_
Smp_200060	13.7017	15.7682	16.8705	20.4661	3.08442	6.85332	4.15957	6.16341	-1.7213	5e-05	0.000181778	17.1241	13.9388	18.2675	16.4906	2.05396	3.62607	4.23566	5.48534	-1.23256	1.00409e-11	1.04489e-10	17.3142	14.094	17.1894	17.5898	2.03004	3.0562	4.43366	5.3315	-1.62919	2.33466e-12	1.7997e-11		hypothetical protein;Smp_200060
Smp_121390	2.1904	2.20819	2.26543	2.16576	0.533629	0.713612	0.637218	0.795271	-1.72029	5e-05	0.000181778	4.60322	4.03132	4.47258	4.19016	1.41852	1.64395	1.52965	1.71094	-0.75077	1.73185e-16	2.84888e-15	2.87019	2.4933	2.71194	2.50504	0.775829	1.009	0.928966	1.00937	-0.968716	8.16263e-15	7.9392e-14	GO:0016020,GO:0016021	hypothetical protein;Smp_121390	Putative uncharacterized protein [Source:UniProtKB/TrEMBL;Acc:C4QUE4]	_	_
Smp_175020	6.53249	6.19766	5.99985	6.30823	2.25046	1.70177	2.12559	1.5309	-1.71841	5e-05	0.000181778	5.89864	7.26955	6.5176	6.31473	1.52393	1.86648	1.08735	1.2088	-1.27157	1.3765e-22	3.63945e-21	3.82025	4.44155	4.03597	3.7615	0.806435	1.09305	0.646424	0.81239	-1.73195	3.87944e-27	8.97155e-26	GO:0005272,GO:0006810,GO:0006811,GO:0006814,GO:0016020,GO:0016021,GO:0035725	hypothetical protein;Smp_175020	Amiloride-sensitive sodium channel,putative [Source:UniProtKB/TrEMBL;Acc:G4LY47]	_	_
Smp_160240	8.28545	7.15942	6.10687	6.66219	2.73682	1.40421	2.16646	2.27423	-1.71707	5e-05	0.000181778	12.9046	15.7419	11.3909	11.326	3.90483	3.77227	2.00118	3.44977	-1.11563	2.21891e-11	2.22451e-10	7.71838	8.93267	6.46215	6.24026	1.89985	2.13066	1.07058	1.8046	-1.53312	5.26925e-14	4.72824e-13	GO:0004252,GO:0006508,GO:0008233,GO:0008236,GO:0016485,GO:0016787	furin 1 (S08 family);Smp_160240
Smp_162770	288.465	397.172	271.972	307.865	47.8759	136.642	86.3082	114.439	-1.71576	5e-05	0.000181778	501.067	386.595	374.342	387.822	36.7931	89.8978	108.293	110.715	-1.37355	1.24331e-08	8.81913e-08	313.222	231.568	221.644	228.423	19.0746	52.213	60.438	61.6438	-1.86136	2.35627e-12	1.81349e-11	GO:0016020,GO:0016021	lysosome associated membrane glycoprotein;note=tmhmm%3B%3Bquery 1-349%3B;Smp_162770	Putative uncharacterized protein [Source:UniProtKB/TrEMBL;Acc:G4VS56]	_	_
Smp_123860	15.352	13.8547	11.3195	13.896	3.93562	3.44417	5.72473	3.49456	-1.71309	5e-05	0.000181778	14.1119	17.3599	13.1835	14.3756	2.54623	5.29257	2.41557	3.16667	-1.26282	8.68217e-18	1.60379e-16	8.99236	10.6239	8.0561	8.66477	1.38261	3.0985	1.36488	1.75626	-1.7485	2.68484e-21	4.27117e-20	GO:0005515,GO:0007268,GO:0007269,GO:0007416,GO:0016020,GO:0016021,GO:0051965,GO:0090129	neurexin 2 alpha;Smp_123860	Putative neurexin [Source:UniProtKB/TrEMBL;Acc:G4V6X2]	gi|21070969|ref|NP_004787.2|	neurexin-3-beta isoform 1 precursor [Homo sapiens]
Smp_154730	20.7824	12.9155	13.7192	14.04	5.30105	3.69424	5.94454	3.81437	-1.71237	5e-05	0.000181778	11.4917	19.215	13.5302	12.3273	3.07718	4.68612	2.05515	2.63013	-1.27495	4.16065e-12	4.5406e-11	7.19806	11.5688	7.96196	7.36956	1.6271	2.75562	1.15657	1.65607	-1.72027	5.88793e-16	6.34125e-15	GO:0000166,GO:0003676	rna binding protein musashi;note=pfam_scan%3BPfam:PF00076.17%3B%3BE()%3D2.1E-16%3Bscore%3D59.1%3Bqu ery 81-140%3Bdescription%3DRRM_1;note=pfam_scan%3BPfam:PF00076.17%3B%3BE()%3D2.2E-19%3Bscore%3D68.7%3Bqu ery 171-236%3Bdescription%3DRRM_1;note=iprscan%3BInterPro:IPR000504 : RNA recognition motif%2C RNP-1%3BSMART:SM00360%3B%3Bscore%3D1.1E-24%3Bquery 170-242%3Bdescription%3DRNA recognition motif%2C…
Smp_140560	67.125	73.4829	68.4041	73.8227	18.8322	22.7894	21.7327	23.1843	-1.70854	5e-05	0.000181778	120.518	122.785	143.23	127.342	21.428	32.7913	27.76	33.3429	-1.23344	5.02062e-69	1.01408e-66	74.8294	72.7601	84.7398	74.4562	10.8338	18.9974	15.2419	18.3745	-1.73978	7.84673e-63	8.98774e-61	GO:0016020,GO:0016021	TLC domain containing protein 2;Smp_140560	Putative uncharacterized protein [Source:UniProtKB/TrEMBL;Acc:G4V9U1]	gi|19923999|ref|NP_612472.1|	TLC domain-containing protein 1 isoform 1 [Homo sapiens]
Smp_181250	3.16281	2.50941	2.52465	2.93737	0.791646	0.822886	0.714314	1.08856	-1.70403	5e-05	0.000181778	2.56059	3.35513	2.77579	2.84285	0.553653	0.616203	0.461527	0.848773	-1.29006	8.62118e-21	2.05458e-19	1.65746	2.07262	1.66944	1.76256	0.282346	0.396466	0.312665	0.485292	-1.7516	9.78685e-24	1.84303e-22	GO:0005515	Down syndrome cell adhesion molecule;Smp_181250	Putative uncharacterized protein [Source:UniProtKB/TrEMBL;Acc:G4VGC2]	_	_
Smp_170560	3.78024	3.65725	2.82521	3.16999	0.676677	1.5916	1.51204	0.346369	-1.70269	5e-05	0.000181778	5.3174	5.73274	4.41478	4.67607	0.618425	1.59017	1.20448	0.597042	-1.4199	5.67117e-09	4.23482e-08	3.37396	3.49128	2.68133	2.8118	0.311926	0.968967	0.719679	0.342369	-1.88743	1.13478e-12	8.96047e-12	GO:0004930,GO:0007186,GO:0016020,GO:0016021	parathyroid hormone 2 receptor;Smp_170560	Putative g-protein coupled receptor [Source:UniProtKB/TrEMBL;Acc:G4VAR0]	_	_
Smp_127820	29.36	26.7509	28.6108	29.5624	7.42908	10.299	9.06551	8.3549	-1.70109	5e-05	0.000181778	35.6149	42.4688	44.0753	41.2078	5.53516	10.7524	8.1413	6.50772	-1.43083	1.05217e-29	4.33571e-28	20.824	23.8364	24.5405	22.4327	3.04326	5.8292	4.92558	4.08636	-1.81209	6.06147e-43	3.02638e-41	GO:0016020,GO:0016021	hypothetical protein;Smp_127820	Putative uncharacterized protein [Source:UniProtKB/TrEMBL;Acc:G4VMP0]	_	_
Smp_074150	11.2014	11.9419	11.6849	12.8982	3.66439	3.49623	3.95171	3.5697	-1.70073	5e-05	0.000181778	24.7432	24.5737	25.8049	25.4572	7.71317	10.3562	8.02439	10.2052	-0.769207	1.78088e-33	9.06705e-32	13.8659	13.5509	14.2859	13.7907	2.74577	4.44524	2.93159	4.0224	-1.43817	4.34253e-58	3.84353e-56	GO:0005509,GO:0005544,GO:0042802,GO:0046872	annexin;Smp_074150	Annexin [Source:UniProtKB/TrEMBL;Acc:C4QH88]	gi|71773329|ref|NP_001146.2|	annexin A6 isoform 1 [Homo sapiens]
Smp_140980	2.43394	2.4528	2.56558	2.22159	0.472426	0.581402	0.931512	0.993094	-1.69955	5e-05	0.000181778	2.09101	2.26524	2.48725	1.88634	0.248691	0.66667	0.343858	0.731912	-1.28262	6.71272e-09	4.94662e-08	1.32425	1.42649	1.54342	1.12128	0.129337	0.387731	0.19242	0.428606	-1.71537	1.02334e-12	8.11397e-12	GO:0003676,GO:0005622,GO:0006355,GO:0008270,GO:0046872	mds1 and evi1 complex locus protein evi1;note=pfam_scan%3BPfam:PF13465.1%3B%3BE()%3D1.7E-7%3Bscore%3D31.0%3Bquer y 160-185%3Bdescription%3Dzf-H2C2_2;note=pfam_scan%3BPfam:PF13465.1%3B%3BE()%3D2.0E-9%3Bscore%3D37.1%3Bquer y 132-156%3Bdescription%3Dzf-H2C2_2;note=iprscan%3BInterPro:IPR007087 : Zinc finger%2C C2H2-type%3BPfam:PF00096%3B%3Bscore%3D5.2E-6%3Bquery 175-197%3Bdescription%3DZinc finger%2C…	Ectopic virus integration site, putative [Source:UniProtKB/TrEMBL;Acc:G4LV51]	gi|255683379|ref|NP_001098547.3|	MDS1 and EVI1 complex locus protein EVI1 isoform a [Homo sapiens]
SmVG_031577	109.449	125.659	101.505	117.779	35.4116	40.6034	32.6174	31.3129	-1.69907	5e-05	0.000181778	118.075	109.726	106.468	110.337	22.0383	27.3556	25.6591	25.1729	-1.22858	6.10736e-76	1.56768e-73	74.0044	65.7008	63.2721	65.0923	11.1393	15.829	14.1406	13.9769	-1.73878	1.30466e-60	1.29613e-58	GO:0005875,GO:0007017
Smp_161360	8.308	6.6154	7.82375	6.36229	2.8997	2.20336	2.01615	1.84718	-1.69889	5e-05	0.000181778	8.13567	10.4066	10.2441	7.96581	2.37543	2.30608	1.86435	2.00446	-1.1916	1.24014e-31	5.72276e-30	4.99383	6.11709	5.92714	4.56966	1.17052	1.29667	0.996062	1.08585	-1.68474	6.91194e-26	1.50547e-24	GO:0008092,GO:0009986,GO:0016020,GO:0016021,GO:0016477	syndecan;Smp_161360	Putative syndecan [Source:UniProtKB/TrEMBL;Acc:G4V9C6]	_	_
Smp_166020	2.76321	3.2762	2.86678	2.63151	0.889901	0.951037	0.874992	0.839622	-1.69821	5e-05	0.000181778	3.91414	4.0588	4.03269	3.24425	0.667617	0.854653	0.697238	0.755184	-1.36556	3.69455e-21	8.9784e-20	2.50657	2.52358	2.45124	1.9936	0.339077	0.508036	0.412647	0.429937	-1.93963	3.53175e-32	1.12738e-30		hypothetical protein;Smp_166020	_	_	_
SmVG_000671	2.66453	3.1491	2.38423	2.59457	0.900578	0.64252	0.696812	1.08847	-1.69713	0.00025	0.000810166	3.299	3.01008	2.92648	2.88152	1.1605	0.885911	0.809923	1.32528	-0.807256	5.39881e-06	2.55252e-05	2.14397	1.89295	1.87949	1.80376	0.631303	0.735372	0.435123	0.902694	-0.942697	4.23273e-06	1.48184e-05
Smp_213900	64.2353	51.048	64.5114	67.1088	16.54	19.3457	21.3481	18.9495	-1.6964	5e-05	0.000181778	70.4958	91.2166	89.3854	87.2428	15.5702	24.9245	19.1703	20.9574	-1.18317	1.46207e-60	2.11931e-58	39.1911	48.6366	47.0187	45.6365	6.77996	12.64	8.96636	10.1323	-1.67511	2.02215e-51	1.40626e-49	GO:0005201,GO:0005581	type IV collagen alpha 1 chain;Smp_213900
Smp_170780	4.79346	2.78404	4.27809	3.96859	0	0.480485	1.77979	2.62449	-1.69577	0.0058	0.013652	5.55498	7.11428	8.13596	6.85317	0.842363	2.24564	0.578958	2.00393	-1.36419	0.000212992	0.000732422	3.7366	4.73798	5.12198	3.73627	0.290844	1.19543	0.322207	1.36186	-1.83007	6.19737e-08	2.8596e-07		hypothetical protein;Smp_170780	Putative uncharacterized protein [Source:UniProtKB/TrEMBL;Acc:G4VAA3]	_	_
SmVG_007958:Smp_130120	9.23878	9.27833	9.3982	9.6754	2.96703	2.71881	3.05329	2.86921	-1.69521	5e-05	0.000181778	13.8317	15.814	15.1541	14.2967	2.70632	3.87513	2.69458	3.28899	-1.29573	4.69691e-47	4.22413e-45	8.50219	9.32508	8.84871	8.27846	1.34301	2.20623	1.42457	1.80847	-1.83289	6.50868e-60	6.27411e-58		tetratricopeptide repeat protein 13;Smp_130120	Putative uncharacterized protein [Source:UniProtKB/TrEMBL;Acc:G4VBU9]	_	_
SmVG_007958:Smp_130140	9.23878	9.27833	9.3982	9.6754	2.96703	2.71881	3.05329	2.86921	-1.69521	5e-05	0.000181778	13.8317	15.814	15.1541	14.2967	2.70632	3.87513	2.69458	3.28899	-1.29573	4.69691e-47	4.22413e-45	8.50219	9.32508	8.84871	8.27846	1.34301	2.20623	1.42457	1.80847	-1.83289	6.50868e-60	6.27411e-58		tetratricopeptide repeat protein 13;note=predicted by EVM2;Smp_130140	Putative uncharacterized protein [Source:UniProtKB/TrEMBL;Acc:G4VBV0]	_	_
Smp_132070	33.1665	35.8165	31.7196	38.6992	9.87511	13.1771	10.171	9.98637	-1.68983	5e-05	0.000181778	39.0521	40.2239	39.8721	41.7475	7.21915	10.1949	9.67163	9.17552	-1.23625	1.11106e-70	2.48897e-68	24.2819	24.0078	23.6703	24.4076	3.67018	5.86622	5.41114	5.0679	-1.73456	1.30134e-56	1.06469e-54	GO:0004889,GO:0005216,GO:0005230,GO:0005886,GO:0005892,GO:0006810,GO:0006811,GO:0007165,GO:0007271,GO:0007274,GO:0015464,GO:0016020,GO:0016021,GO:0030054,GO:0035094,GO:0042166,GO:0045202,GO:0045211,GO:0098655,GO:0099565	nAChR subunit;Smp_132070	Putative nachr subunit [Source:UniProtKB/TrEMBL;Acc:G4VNZ7]	gi|4502827|ref|NP_000735.1|	neuronal acetylcholine receptor subunit alpha-4 precursor [Homo sapiens]
Smp_130050	11.4981	11.9242	11.2571	10.2184	3.68763	3.73021	3.43734	3.07232	-1.68871	5e-05	0.000181778	14.4006	14.7932	16.4043	13.2129	3.3335	3.67231	2.83403	3.76113	-1.18732	1.10255e-16	1.85075e-15	9.08892	8.9579	9.75845	7.77368	1.67945	2.11905	1.54778	2.10546	-1.69252	2.38874e-26	5.32192e-25	GO:0004842,GO:0005515,GO:0008270,GO:0016567,GO:0046872	PDZ domain containing RING finger protein;Smp_130050	Putative uncharacterized protein [Source:UniProtKB/TrEMBL;Acc:G4LXM7]	_	_
SmVG_001664	24.3902	21.9511	12.8113	17.3036	5.25537	8.72844	4.13055	5.65785	-1.68536	0.00035	0.00110242	12.0431	9.74645	7.04162	7.06774	2.69013	2.67134	4.00932	4.05009	-0.669673	0.00550756	0.0136098	17.4027	18.7614	12.7298	12.1854	3.41948	4.14134	6.10792	6.88413	-1.04271	5.17922e-05	0.000150477
Smp_159390	8.63427	5.10072	6.80955	7.59985	1.72738	0.878349	3.32589	2.8205	-1.68514	0.00435	0.0106024	30.4077	51.7514	35.2424	42.6716	6.57757	13.135	5.36017	9.21427	-1.25358	1.61077e-11	1.63884e-10	20.3031	32.0166	23.1952	26.0101	3.31869	7.95053	3.71573	5.22689	-1.71914	1.93522e-13	1.66296e-12	GO:0016020,GO:0016021	hypothetical protein;Smp_159390
Smp_050520	44.004	45.8184	37.393	43.1754	14.0044	10.2049	17.4045	11.4043	-1.68429	5e-05	0.000181778	53.5545	57.1206	48.6401	50.7012	10.99	17.8549	7.99352	11.1437	-1.25282	2.87187e-19	6.03827e-18	32.5929	33.5086	28.2318	29.0763	5.37211	9.97274	4.18333	5.93911	-1.74554	9.733e-28	2.35138e-26	GO:0005509,GO:0005515,GO:0007154,GO:0007275,GO:0016020,GO:0016021	neurogenic locus notch protein;Smp_050520	Notch [Source:UniProtKB/TrEMBL;Acc:G4VH90]	gi|134244285|ref|NP_000426.2|	neurogenic locus notch homolog protein 3 precursor [Homo sapiens]
SmVG_019829	3.21148	3.75864	3.6918	3.07269	1.45708	0.659273	0.672754	1.4955	-1.68058	0.00035	0.00110242	4.44511	3.99155	5.2949	3.60019	0.987415	0.713836	0.389643	1.26153	-1.39021	3.48346e-06	1.69912e-05	3.01112	2.61782	3.41545	2.23029	0.606866	0.43414	0.237017	0.758562	-1.93581	7.5193e-10	4.38109e-09
Smp_079640	3.96878	3.90931	4.32511	4.48105	1.36425	1.24314	1.16635	1.43162	-1.68042	5e-05	0.000181778	3.71016	4.10744	4.68811	4.31939	0.995394	1.07777	0.922399	1.35917	-1.09517	1.53401e-20	3.57288e-19	2.26773	2.44889	2.72737	2.51695	0.493234	0.634773	0.483983	0.735278	-1.53534	3.28986e-23	5.94251e-22	GO:0005215,GO:0016020,GO:0016021,GO:0034220,GO:0055085	monocarboxylate transporter;Smp_079640	Putative monocarboxylate transporter [Source:UniProtKB/TrEMBL;Acc:G4V7W3]	_	_
SmVG_000099	11.2549	11.7279	6.7921	8.31583	4.16937	3.23642	3.19985	1.29379	-1.67855	5e-05	0.000181778	14.4129	13.6558	10.241	10.4283	4.203	4.90786	3.15305	3.5206	-0.83739	9.77826e-07	5.20423e-06	9.5373	9.1204	6.55445	6.89623	2.49646	3.06621	1.85268	2.14975	-1.15696	8.66113e-08	3.92391e-07
Smp_166060	6.08927	3.66243	2.88898	4.04827	1.48667	0.64372	2.12345	0.969837	-1.67575	5e-05	0.000181778	4.57288	7.55303	4.0509	4.61268	1.3173	2.24095	0.663112	0.847645	-1.21511	1.98355e-05	8.40994e-05	3.06173	5.0466	2.5347	3.03955	0.729498	1.32366	0.36785	0.582679	-1.64103	1.25623e-07	5.55685e-07	GO:0016020,GO:0016021	hypothetical protein;Smp_166060	Putative uncharacterized protein [Source:UniProtKB/TrEMBL;Acc:G4LV84]	_	_
Smp_054350	21.1002	20.3001	13.7754	18.7221	8.65459	3.25078	7.961	3.30072	-1.67346	5e-05	0.000181778	19.1588	21.3511	14.9866	17.7809	5.4501	6.45098	2.01909	2.73436	-1.3177	4.97616e-06	2.36815e-05	11.9101	12.8137	8.83162	10.3779	2.72057	3.70408	1.09085	1.47474	-1.73295	8.39508e-09	4.30862e-08	GO:0000981,GO:0003677,GO:0003700,GO:0005634,GO:0006351,GO:0006355,GO:0006357,GO:0043565	Forkhead box protein D3;Smp_054350	Putative forkhead protein/ forkhead protein domain [Source:UniProtKB/TrEMBL;Acc:G4VQJ9]	_	_
Smp_036010	25.5809	32.6002	21.1958	26.1513	6.93406	11.011	7.95289	7.28889	-1.66895	5e-05	0.000181778	47.0155	41.3053	35.4439	37.4409	6.58391	9.81159	10.2252	8.99173	-1.25224	3.32557e-26	1.08685e-24	29.8114	25.2107	21.3471	22.4316	3.40633	5.75758	5.74814	5.10096	-1.7798	1.06986e-31	3.26525e-30	GO:0015095,GO:0015693,GO:0016020,GO:0016021,GO:1903830	magnesium transporter nipa2;Smp_036010	Putative uncharacterized protein [Source:UniProtKB/TrEMBL;Acc:G4VHT3]	gi|46409302|ref|NP_997213.1|	magnesium transporter NIPA3 [Homo sapiens]
Smp_203030	12.572	18.8909	11.704	14.0713	3.12795	5.97865	4.6799	4.22141	-1.66835	0.0001	0.000349068	81.2016	66.1206	64.3374	67.3722	9.06115	17.5231	15.4147	14.7605	-1.3486	1.76607e-25	5.52277e-24	49.562	38.9399	37.1047	38.2216	4.22196	9.01637	7.65329	7.30552	-1.98052	7.99356e-37	3.11301e-35	GO:0016020,GO:0016021	hypothetical protein;note=tmhmm%3B%3Bquery 1-121%3B;note=%3Bquery 1-32%3B;note=%3Bquery 33-55%3B;note=%3Bquery 56-121%3B;Smp_203030	Putative uncharacterized protein Smp_203030 [Source:UniProtKB/TrEMBL;Acc:G4VME9]	_	_
SmVG_023631:Smp_154360	12.2762	10.9841	13.2001	14.2699	3.66703	3.82148	4.18543	4.3396	-1.66355	5e-05	0.000181778	11.9549	14.8905	15.8505	16.0152	2.66904	4.07856	2.63998	3.79092	-1.24717	8.75817e-52	9.72157e-50	7.31728	8.87028	9.43439	9.26229	1.32551	2.30442	1.42514	2.09697	-1.76013	8.96457e-47	5.10404e-45		cation transporting atpase worm;Smp_154360	Putative cation-transporting atpase worm [Source:UniProtKB/TrEMBL;Acc:G4VT22]	gi|312836773|ref|NP_001186113.1|	calcium-transporting ATPase type 2C member 1 isoform 1f [Homo sapiens]
SmVG_023631:Smp_172750	12.2762	10.9841	13.2001	14.2699	3.66703	3.82148	4.18543	4.3396	-1.66355	5e-05	0.000181778	11.9549	14.8905	15.8505	16.0152	2.66904	4.07856	2.63998	3.79092	-1.24717	8.75817e-52	9.72157e-50	7.31728	8.87028	9.43439	9.26229	1.32551	2.30442	1.42514	2.09697	-1.76013	8.96457e-47	5.10404e-45		cation transporting atpase worm;Smp_172750	Putative cation transporting ATPase [Source:UniProtKB/TrEMBL;Acc:G4VT23]	gi|66730421|ref|NP_940907.2|	probable cation-transporting ATPase 13A5 [Homo sapiens]
Smp_013630	18.0452	16.7007	15.437	19.4192	5.28292	5.67908	6.44549	4.59009	-1.66179	5e-05	0.000181778	16.3233	18.3324	16.8376	18.5764	3.37895	5.61322	3.77431	4.13861	-1.17373	5.80792e-36	3.32834e-34	10.2759	11.3169	10.103	11.1509	1.73817	3.29801	2.09002	2.30461	-1.65284	1.32255e-33	4.48653e-32	GO:0005509,GO:0005886,GO:0007155,GO:0007156,GO:0016020,GO:0016021	cadherin;Smp_013630	Cadherin-related [Source:UniProtKB/TrEMBL;Acc:G4VEK9]	gi|11128035|ref|NP_061746.1|	protocadherin gamma-B2 isoform 1 precursor [Homo sapiens]
Smp_133690	37.4493	40.3003	33.0962	37.4555	10.7044	12.5816	12.6414	10.9579	-1.66132	5e-05	0.000181778	42.2473	41.3199	38.7557	38.1864	7.45737	11.8295	8.72321	9.78992	-1.19883	6.48981e-74	1.59922e-71	26.7714	25.0628	23.2992	22.7541	3.86128	6.87112	4.98608	5.52415	-1.69733	1.90146e-66	2.43587e-64	GO:0004714,GO:0007155,GO:0016020,GO:0016021,GO:0016740,GO:0018108	discoidin domain containing receptor 2;Smp_133690	Putative discoidin domain receptor [Source:UniProtKB/TrEMBL;Acc:G4VDF2]	_	_
Smp_018980	3.23724	2.57495	2.33228	2.22682	0.763124	0.862906	1.13226	0.526473	-1.65873	5e-05	0.000181778	2.74844	3.69195	2.92097	2.39972	0.501058	1.22357	0.79075	0.611313	-1.10259	8.76299e-10	7.25109e-09	1.70359	2.18423	1.71145	1.3874	0.267278	0.681684	0.429148	0.331595	-1.48588	9.27218e-12	6.73686e-11	GO:0005622,GO:0008270,GO:0046872	hypothetical protein;Smp_018980	Putative uncharacterized protein [Source:UniProtKB/TrEMBL;Acc:G4VG35]	_	_
Smp_025830	4.0536	5.33026	4.56211	4.55984	1.30363	1.70013	1.21416	1.65262	-1.65641	5e-05	0.000181778	15.431	12.2559	13.1892	13.145	2.661	3.54015	3.29437	3.57926	-1.16262	8.40535e-56	1.01532e-53	9.33715	7.12217	7.54295	7.53926	1.24943	1.83964	1.67527	1.84007	-1.71894	3.57295e-46	1.98779e-44	GO:0000166,GO:0003953,GO:0008152,GO:0016020,GO:0016021,GO:0016787,GO:0016798	adp ribosyl cyclase;Smp_025830	Putative adp-ribosyl cyclase [Source:UniProtKB/TrEMBL;Acc:G4VAQ4]	_	_
Smp_204310	3.33882	3.1132	3.24516	3.10658	0.981508	0.899879	1.09362	1.10129	-1.65124	5e-05	0.000181778	3.14804	3.77256	3.43299	3.1848	0.737894	0.97414	0.593546	1.02946	-1.15489	3.3138e-16	5.25475e-15	2.00065	2.36753	2.17552	1.99099	0.41871	0.621371	0.376303	0.703446	-1.46203	8.39493e-19	1.13047e-17	GO:0016020,GO:0016021	hypothetical protein;note=tmhmm%3B%3Bquery 1-188%3B;Smp_204310
Smp_146940	3.4795	3.47371	2.70414	3.26769	1.32696	0.770132	1.26222	0.76049	-1.64952	5e-05	0.000181778	3.43992	4.15314	3.4206	3.47251	0.809314	1.23299	0.581035	0.66084	-1.24987	4.60666e-14	6.03489e-13	2.27625	2.58421	2.35424	2.173	0.417946	0.720855	0.305094	0.407047	-1.78237	1.5891e-20	2.4288e-19	GO:0005921,GO:0006810,GO:0006811,GO:0016020,GO:0016021,GO:0030054	innexin;note=pfam_scan%3BPfam:PF00876.13%3B%3BE()%3D1.4E-39%3Bscore%3D136.1%3Bq uery 178-337%3Bdescription%3DInnexin;note=pfam_scan%3BPfam:PF00876.13%3B%3BE()%3D6.2E-55%3Bscore%3D186.6%3Bq uery 676-865%3Bdescription%3DInnexin;note=iprscan%3BInterPro:IPR000990 : Innexin%3BPfam:PF00876%3B%3Bscore%3D1.6E-32%3Bquery 178-867%3Bdescription%3DInnexin;Smp_146940	Putative innexin [Source:UniProtKB/TrEMBL;Acc:G4VDZ9]	_	_
Smp_214150	1.74289	1.90852	1.97031	2.01316	0.582907	0.430424	0.688291	0.741473	-1.6439	5e-05	0.000181778	2.38222	2.37853	2.77533	2.40952	0.635196	0.975759	0.624369	1.14444	-0.845903	1.518e-08	1.0645e-07	1.49678	1.45863	1.67659	1.43838	0.289861	0.600747	0.302786	0.54194	-1.25971	5.10354e-13	4.18955e-12		hypothetical protein;Smp_214150
SmVG_011530	17.033	14.8399	28.0725	19.4385	5.27437	7.33583	5.12219	7.69083	-1.6427	5e-05	0.000181778	15.5516	18.9315	31.4235	19.9706	4.13482	5.05453	5.42336	7.30858	-1.09195	1.67922e-12	1.90338e-11	9.68293	11.3553	18.7567	11.7244	2.07745	2.89211	2.99505	3.97504	-1.55761	9.56758e-15	9.25024e-14
Smp_035210	97.1515	95.1871	90.6842	102.863	32.0086	29.031	34.3907	28.4387	-1.63936	5e-05	0.000181778	126.916	139.918	134.351	138.126	29.5277	41.1424	28.0365	34.1547	-1.15031	8.42166e-71	1.92154e-68	77.7328	81.8762	77.8041	79.4972	14.659	23.1455	14.9203	18.1922	-1.63345	1.58526e-61	1.64192e-59	GO:0003774,GO:0016459	multivalent antigen sj97 GAPDH;Smp_035210	Putative uncharacterized protein [Source:UniProtKB/TrEMBL;Acc:G4V802]	gi|115527082|ref|NP_005954.3|	myosin-1 [Homo sapiens]
Smp_018250	553.815	500.185	544.145	525.38	175.435	163.076	172.06	172.48	-1.63639	5e-05	0.000181778	587.638	709.241	698.25	627.812	147.281	190.075	132.266	176.175	-1.14391	2.72133e-59	3.81017e-57	368.421	426.969	415.021	369.965	74.4956	109.288	73.0466	96.7224	-1.61913	4.18966e-60	4.12026e-58	GO:0005861	troponin i;Smp_018250.2	Putative troponin I [Source:UniProtKB/TrEMBL;Acc:G4VGQ6]	gi|151101270|ref|NP_000354.4|	troponin I, cardiac muscle [Homo sapiens]
Smp_132740	19.8196	14.8044	12.4818	14.6797	6.0731	3.47124	6.34539	4.01417	-1.63422	5e-05	0.000181778	17.6095	24.5816	16.1602	16.8949	4.90404	6.82644	2.76015	4.00793	-1.17441	1.8608e-09	1.47345e-08	10.7519	14.4167	9.50947	9.71384	2.39936	3.96971	1.63771	2.24338	-1.57381	8.31798e-14	7.37558e-13	GO:0005506,GO:0006629,GO:0006633,GO:0016020,GO:0016021,GO:0016213,GO:0016491,GO:0016717,GO:0020037,GO:0055114	fatty acid desaturase 2;Smp_132740	Fatty acid desaturase, putative [Source:UniProtKB/TrEMBL;Acc:G4LUC5]	gi|4758334|ref|NP_004256.1|	fatty acid desaturase 2 [Homo sapiens]
Smp_147190	3.88865	2.21869	1.23048	2.23929	1.04179	0.5009	1.07944	0.465192	-1.63323	0.00685	0.0158078	2.66132	4.63693	1.60535	2.67229	0.603162	0.8713	0.321123	0.541718	-1.28058	5.20218e-06	2.46903e-05	1.69886	2.92825	1.00273	1.81005	0.325323	0.632949	0.180807	0.312262	-1.79876	5.0939e-06	1.75431e-05	GO:0016020,GO:0016021	hypothetical protein;Smp_147190	Putative uncharacterized protein [Source:UniProtKB/TrEMBL;Acc:G4VCP7]	_	_
Smp_176470	3.6814	3.45029	2.67804	3.18015	1.11016	1.11843	1.05794	0.90368	-1.6323	5e-05	0.000181778	4.68776	4.98326	3.94358	4.51096	0.878363	1.25244	0.800412	0.93271	-1.29196	5.78941e-27	1.98142e-25	3.05933	3.25757	2.49826	2.845	0.509276	0.810067	0.510345	0.609137	-1.73221	5.00089e-27	1.15103e-25	GO:0005509,GO:0005886,GO:0007155,GO:0007156,GO:0016020,GO:0016021	protocadherin 1;Smp_176470	Cadherin, putative [Source:UniProtKB/TrEMBL;Acc:G4LWC2]	gi|27754773|ref|NP_115796.2|	protocadherin-1 isoform 2 precursor [Homo sapiens]
Smp_163080	9.90182	8.25457	6.81557	7.42791	2.72149	2.21962	2.67906	2.8463	-1.63021	5e-05	0.000181778	8.28241	10.6104	7.70957	7.42977	1.84752	2.33931	1.58883	2.41336	-1.16847	2.76569e-34	1.47515e-32	5.11923	6.29446	4.55093	4.40944	0.953304	1.35026	0.861218	1.30685	-1.65655	5.4959e-32	1.715e-30	GO:0000166,GO:0003951,GO:0004143,GO:0005524,GO:0005622,GO:0007165,GO:0007205,GO:0008152,GO:0016301,GO:0016310,GO:0016740,GO:0035556,GO:0046872	Diacylglycerol kinase theta;Smp_163080	Diacylglycerol kinase, theta, putative [Source:UniProtKB/TrEMBL;Acc:G4LUV8]	gi|40806175|ref|NP_001338.2|	diacylglycerol kinase theta [Homo sapiens]
Smp_155970	6.81317	6.04622	6.11994	7.64998	2.26605	2.1037	2.74787	1.4942	-1.62862	5e-05	0.000181778	6.11307	7.72309	6.6693	7.74016	1.54087	2.4202	1.30138	1.30773	-1.21963	1.3317e-16	2.22214e-15	3.87779	4.69895	4.03504	4.62953	0.789218	1.41145	0.719692	0.721348	-1.69545	1.49346e-18	1.96757e-17	GO:0005267,GO:0005887,GO:0006810,GO:0006811,GO:0016020,GO:0016021,GO:0022841,GO:0030322,GO:0071805	Two pore potassium channel protein sup 9;Smp_155970
SmVG_035878	4.27526	2.43685	2.81957	3.24893	1.59221	0.750602	0.603826	1.19004	-1.62741	5e-05	0.000181778	3.01418	4.56744	3.51386	3.73666	1.44385	0.734087	0.960928	1.50033	-0.911835	2.3579e-05	9.8447e-05	2.04347	2.92789	2.14513	2.47532	0.821182	0.425196	0.455208	0.694107	-1.42436	1.18895e-06	4.52703e-06
Smp_125940	18.2611	16.6861	15.6492	18.6467	5.90329	4.9059	5.587	6.03742	-1.62601	5e-05	0.000181778	18.2652	21.6148	19.5406	20.8934	4.45427	5.5074	3.97347	5.64388	-1.15609	4.26495e-41	3.20418e-39	11.362	12.8918	11.522	12.2399	2.23925	3.15165	2.17443	3.13688	-1.6331	1.33017e-43	6.88858e-42	GO:0005515,GO:0016020,GO:0016021	hypothetical protein;Smp_125940	Putative uncharacterized protein [Source:UniProtKB/TrEMBL;Acc:G4LWG8]	_	_
SmVG_012448:Smp_136330	5.91187	5.33733	4.62028	4.69291	1.95809	1.40847	1.77589	1.54225	-1.62107	5e-05	0.000181778	7.42976	9.18716	7.07771	6.82934	1.89457	2.33561	1.43721	2.01752	-1.12663	2.72996e-29	1.09921e-27	4.58119	5.42888	4.16325	3.98411	0.945463	1.34084	0.796511	1.08952	-1.58891	9.74453e-29	2.52321e-27		liprin alpha 2;Smp_136330	Lip-related protein (Liprin) alpha [Source:UniProtKB/TrEMBL;Acc:G4VEZ7]	gi|4505983|ref|NP_003617.1|	liprin-alpha-1 isoform b [Homo sapiens]
SmVG_012448:Smp_183130	5.91187	5.33733	4.62028	4.69291	1.95809	1.40847	1.77589	1.54225	-1.62107	5e-05	0.000181778	7.42976	9.18716	7.07771	6.82934	1.89457	2.33561	1.43721	2.01752	-1.12663	2.72996e-29	1.09921e-27	4.58119	5.42888	4.16325	3.98411	0.945463	1.34084	0.796511	1.08952	-1.58891	9.74453e-29	2.52321e-27		liprin alpha 2;Smp_183130	Putative liprin alpha (Lar-interacting protein alpha) (Synapse defective protein 2) [Source:UniProtKB/TrEMBL;Acc:G4VEZ8]	gi|4505983|ref|NP_003617.1|	liprin-alpha-1 isoform b [Homo sapiens]
Smp_163630	125.093	106.056	41.3637	69.9299	33.61	17.1882	33.7014	26.8841	-1.62033	5e-05	0.000181778	406.829	493.882	166.827	263.146	79.3652	113.799	40.7301	77.9919	-1.15335	0.000224224	0.000767619	268.714	315.748	104.659	163.726	44.4966	70.8308	24.2871	46.1168	-1.68829	2.46729e-07	1.0417e-06		developmentally regulated antigen 10;MEG-4 (10.3) family;Smp_163630.2	MEG-4 (10.3) family [Source:UniProtKB/TrEMBL;Acc:G4V7K7]	_	_
Smp_102400	43.5452	64.9573	37.758	42.7513	8.63508	22.2872	13.1915	17.4041	-1.6194	5e-05	0.000181778	68.6819	49.9826	44.0536	46.7545	6.1087	11.7473	14.2445	15.6015	-1.24566	7.4228e-09	5.44707e-08	43.5185	30.6746	26.6457	27.8703	3.17046	6.88438	8.11244	8.64573	-1.72694	5.36107e-12	3.99658e-11	GO:0000139,GO:0005794,GO:0006486,GO:0008378,GO:0016020,GO:0016021,GO:0016740,GO:0016757,GO:0047273	galactosyltransferase;Smp_102400	Putative beta1,3-galactosyltransferase [Source:UniProtKB/TrEMBL;Acc:G4VBF6]	gi|15451881|ref|NP_149360.1|	beta-1,3-galactosyltransferase 5 [Homo sapiens]
Smp_188700	30.454	17.3864	18.293	19.2028	9.01131	4.55212	8.48081	5.74774	-1.61849	0.0008	0.00232996	23.0617	43.6827	26.0683	24.2958	7.92292	9.98948	3.89892	5.54458	-1.18785	3.4955e-07	2.00131e-06	14.6086	26.2011	15.5277	14.5741	4.14645	5.8957	2.23786	3.24393	-1.64022	1.29396e-09	7.3372e-09	GO:0003743,GO:0006413	eukaryotic translation initiation;Smp_188700	Putative eukaryotic translation initiation factor 3 subunit (Eif-3) [Source:UniProtKB/TrEMBL;Acc:G4VA35]	gi|87162455|ref|NP_056044.3|	hypothetical protein LOC23277 [Homo sapiens]
Smp_129380	4.52853	4.56061	4.3539	4.14325	1.22364	1.30183	1.78632	1.4191	-1.61762	5e-05	0.000181778	5.02779	5.17911	5.19289	4.82107	1.11952	1.81343	1.05988	1.3901	-1.08035	6.06045e-18	1.14001e-16	3.15914	3.15857	3.13088	2.83907	0.573275	1.03864	0.574995	0.76126	-1.51479	3.17999e-24	6.26729e-23	GO:0005216,GO:0005244,GO:0005249,GO:0005251,GO:0005267,GO:0005515,GO:0006810,GO:0006811,GO:0006813,GO:0008076,GO:0016020,GO:0016021,GO:0034765,GO:0051260,GO:0055085,GO:0071805	potassium voltage gated channel subfamily A;note=pfam_scan%3BPfam:PF02214.17%3B%3BE()%3D1.6E-27%3Bscore%3D95.4%3Bqu ery 30-119%3Bdescription%3DK_tetra;note=pfam_scan%3BPfam:PF00520.26%3B%3BE()%3D1.9E-31%3Bscore%3D108.7%3Bq uery 214-396%3Bdescription%3DIon_trans;note=iprscan%3BInterPro:IPR005821 : Ion transport%3BPfam:PF00520%3B%3Bscore%3D2.0E-44%3Bquery 215-396%3Bdescription%3DIon transport;note=…	Putative voltage-gated potassium channel [Source:UniProtKB/TrEMBL;Acc:G4VEH3]	gi|27436984|ref|NP_004971.2|	potassium voltage-gated channel subfamily D member 3 isoform 1 [Homo sapiens]
Smp_141390	63.6991	61.0039	47.0295	56.2791	17.4536	19.4776	23.9181	13.4705	-1.61729	5e-05	0.000181778	78.7956	90.1822	68.7516	74.2138	13.627	27.4246	14.7984	15.2208	-1.24909	1.23427e-18	2.46075e-17	47.1751	52.3594	39.6426	42.5278	6.76791	15.231	8.4796	8.15442	-1.7195	7.31869e-26	1.59051e-24	GO:0005921,GO:0006810,GO:0006811,GO:0016020,GO:0016021,GO:0030054	innexin unc 9;Smp_141390	Putative innexin [Source:UniProtKB/TrEMBL;Acc:G4V7R0]	_	_
SmVG_022394:Smp_139400	3.0656	2.49184	2.47388	2.58232	1.04941	0.707353	0.865686	0.85034	-1.61176	5e-05	0.000181778	3.25682	4.11901	3.66124	3.37378	0.931737	1.05512	0.659653	1.03945	-1.11642	2.44865e-32	1.17851e-30	2.05504	2.48251	2.16944	1.99497	0.47436	0.587174	0.367925	0.556428	-1.59143	1.10589e-30	3.16674e-29		tensin 1;Smp_139400	Putative tensin [Source:UniProtKB/TrEMBL;Acc:G4VN79]	gi|38787941|ref|NP_056134.2|	tensin-like C1 domain-containing phosphatase isoform 1 [Homo sapiens]
SmVG_022394:Smp_203340	3.0656	2.49184	2.47388	2.58232	1.04941	0.707353	0.865686	0.85034	-1.61176	5e-05	0.000181778	3.25682	4.11901	3.66124	3.37378	0.931737	1.05512	0.659653	1.03945	-1.11642	2.44865e-32	1.17851e-30	2.05504	2.48251	2.16944	1.99497	0.47436	0.587174	0.367925	0.556428	-1.59143	1.10589e-30	3.16674e-29		hypothetical protein;note=tmhmm%3B%3Bquery 1-82%3B;Smp_203340
Smp_081430	119.187	99.0427	82.9369	98.3628	39.0663	26.0628	41.5405	24.2204	-1.60995	5e-05	0.000181778	117.511	143.455	108.159	113.156	33.043	43.7937	22.1235	27.8238	-1.09893	8.10946e-14	1.03664e-12	73.2254	86.1513	64.2893	66.6611	16.7318	25.027	12.1031	15.3034	-1.53072	1.46693e-19	2.08497e-18	GO:0000166,GO:0008152,GO:0016491,GO:0055114	retinol dehydrogenase 11;Smp_081430	Short chain dehydrogenase,putative [Source:UniProtKB/TrEMBL;Acc:G4LV77]	gi|225579078|ref|NP_001139443.1|	retinol dehydrogenase 13 isoform 1 [Homo sapiens]
Smp_170820	21.5067	17.2124	18.7415	21.7222	6.51424	5.40263	9.00087	5.07714	-1.60696	5e-05	0.000181778	28.2954	37.0507	33.2248	33.4597	6.88901	13.4098	6.46329	7.26147	-1.1344	2.03099e-15	3.02952e-14	16.8361	21.0539	18.7407	18.6296	3.31547	7.25827	3.32354	3.75219	-1.56058	1.00818e-20	1.55556e-19	GO:0000166,GO:0005524,GO:0006200,GO:0006810,GO:0006855,GO:0008559,GO:0016020,GO:0016021,GO:0016787,GO:0016887,GO:0017111,GO:0042626,GO:0042908,GO:0055085	ATP binding cassette subfamily B (MDR:TAP);Smp_170820	Multidrug resistance protein 1, 2, 3 (P glycoprotein 1, 2, 3), putative [Source:UniProtKB/TrEMBL;Acc:G4M1X1]	gi|21536378|ref|NP_003733.2|	bile salt export pump [Homo sapiens]
Smp_093210	20.4573	18.827	15.5256	19.6062	6.86204	4.85908	5.86567	6.86812	-1.60549	5e-05	0.000181778	18.6346	21.6515	17.1531	19.3345	4.63993	5.10577	3.02471	5.79674	-1.17713	1.45296e-20	3.39694e-19	11.8812	13.4206	10.3379	11.5381	2.42241	3.01839	1.67811	3.17076	-1.65157	1.52294e-23	2.82964e-22	GO:0005272,GO:0006810,GO:0006811,GO:0006814,GO:0016020,GO:0016021,GO:0035725	FMRFamide activated amiloride sensitive sodium;Smp_093210	Putative amiloride-sensitive sodium channel [Source:UniProtKB/TrEMBL;Acc:G4V8Q7]	_	_
Smp_132540	4.03138	3.04223	2.63719	3.18785	0.777162	1.01365	1.21473	1.23791	-1.60391	5e-05	0.000181778	2.98385	4.3019	2.90519	3.2246	0.503869	1.08947	0.624441	1.09948	-1.17653	2.41956e-13	2.97223e-12	1.93047	2.65319	1.75418	1.95511	0.276726	0.653824	0.420161	0.638357	-1.56237	9.62907e-15	9.29124e-14	GO:0005509,GO:0005515,GO:0005576,GO:0007409	protein slit;Smp_132540	Axon guidance protein [Source:UniProtKB/TrEMBL;Acc:G4VG21]	gi|4759146|ref|NP_004778.1|	slit homolog 2 protein precursor [Homo sapiens]
Smp_153990	29.215	25.2728	27.7791	24.6128	7.76591	7.92519	11.0583	8.48768	-1.60082	5e-05	0.000181778	58.9871	68.3606	66.4412	56.7456	12.9139	22.0018	11.6472	15.033	-1.16974	2.63754e-33	1.31567e-31	35.7515	39.7146	38.1685	32.1491	6.20346	12.1465	6.15875	7.91521	-1.63538	4.5632e-39	1.91497e-37	GO:0008270,GO:0046872	LIM domain and actin binding protein 1;Smp_153990	Putative uncharacterized protein [Source:UniProtKB/TrEMBL;Acc:G4VJ55]	gi|165905589|ref|NP_001107018.1|	LIM domain and actin-binding protein 1 isoform a [Homo sapiens]
Smp_043220	915.108	1002.07	890.03	1063.57	363.983	289.639	328.844	294.825	-1.59954	5e-05	0.000181778	948.85	926.229	938.967	997.922	231.465	276.466	182.102	234.91	-1.16107	3.5057e-49	3.51169e-47	587.008	547.765	550.427	579.469	116.824	157.497	99.401	129.117	-1.63775	7.99513e-43	3.9513e-41	GO:0016020,GO:0016021	hypothetical protein;note=predicted by EVM2;note=tmhmm%3B%3Bquery 1-208%3B;note=%3Bquery 193-208%3B;note=%3Bquery 170-192%3B;note=%3Bquery 1-169%3B;Smp_043220	Putative uncharacterized protein [Source:UniProtKB/TrEMBL;Acc:G4VIX8]	_	_
SmVG_018669:Smp_168500	21.4034	14.2364	12.6067	14.7761	5.89238	4.03712	6.74698	4.21922	-1.59266	5e-05	0.000181778	19.1302	30.324	19.1003	19.8161	5.49155	8.68181	4.2458	5.55532	-1.05969	6.5616e-11	6.25739e-10	12.0218	18.107	11.3922	11.7347	2.8439	5.04456	2.40045	3.1499	-1.47947	4.71295e-16	5.11541e-15		hypoxanthine guanine phosphoribosyltransferase;Smp_168500	Hypoxanthine-guanine phosphoribosyltransferase,putative [Source:UniProtKB/TrEMBL;Acc:G4LWQ1]	gi|9910262|ref|NP_064585.1|	phosphoribosyltransferase domain-containing protein 1 [Homo sapiens]
SmVG_018669:Smp_198230	21.4034	14.2364	12.6067	14.7761	5.89238	4.03712	6.74698	4.21922	-1.59266	5e-05	0.000181778	19.1302	30.324	19.1003	19.8161	5.49155	8.68181	4.2458	5.55532	-1.05969	6.5616e-11	6.25739e-10	12.0218	18.107	11.3922	11.7347	2.8439	5.04456	2.40045	3.1499	-1.47947	4.71295e-16	5.11541e-15		hypothetical protein;Smp_198230	Putative uncharacterized protein [Source:UniProtKB/TrEMBL;Acc:G4LWQ0]	gi|89001107|ref|NP_055023.2|	dentin sialophosphoprotein preproprotein [Homo sapiens]
Smp_083770	2.92142	3.01403	2.93086	1.94084	1.12479	0.601243	0.760917	1.09796	-1.59198	5e-05	0.000181778	3.90045	4.22066	4.17402	2.48095	0.926992	1.00344	0.655285	1.40328	-1.05357	4.03879e-11	3.94623e-10	2.38458	2.45937	2.41941	1.41474	0.454808	0.584521	0.365312	0.747267	-1.46711	4.9635e-11	3.32815e-10	GO:0005254,GO:0006810,GO:0006811,GO:0006821,GO:0016020,GO:0016021,GO:0034707,GO:0046983	anoctamin 7;Smp_083770	Anoctamin [Source:UniProtKB/TrEMBL;Acc:G4V6U1]	gi|209862785|ref|NP_065106.2|	anoctamin-2 [Homo sapiens]
SmVG_036019	10.8264	9.47734	6.59762	10.4251	2.50942	2.63416	4.9784	2.26853	-1.59096	5e-05	0.000181778	9.38483	10.2286	6.58051	9.5295	1.46754	3.94705	1.52115	1.92327	-1.14961	2.11457e-06	1.06821e-05	6.66478	7.12473	4.26828	6.58214	0.779945	2.6935	0.964172	1.39256	-1.49719	4.36083e-07	1.76684e-06
Smp_008850	5.75671	4.10709	4.1355	4.22761	1.26953	1.13073	1.97298	1.6908	-1.58772	5e-05	0.000181778	5.36568	7.47157	5.80221	4.93871	1.30032	2.29566	1.15471	2.44761	-0.947166	6.69935e-08	4.28126e-07	3.33779	4.40158	3.39065	2.84536	0.724529	1.29869	0.625356	1.28349	-1.28116	2.90706e-09	1.57765e-08	GO:0004930,GO:0007186,GO:0016020,GO:0016021	fmrfamide receptor;Smp_008850	Putative peptide (FMRFamide/somatostatin)-like receptor [Source:UniProtKB/TrEMBL;Acc:G4VIE4]	_	_
SmVG_024701:Smp_096420	3.81751	4.19355	3.06904	3.12276	1.05152	1.48973	1.12509	1.06863	-1.58476	5e-05	0.000181778	5.43844	5.31701	4.906	4.35267	0.946934	1.42357	1.47433	1.2745	-1.10669	8.45972e-17	1.43373e-15	3.31898	3.1189	2.84189	2.51714	0.463893	0.797803	0.803601	0.685662	-1.56043	5.585e-19	7.57319e-18		hypothetical protein;Smp_096420	Putative uncharacterized protein [Source:UniProtKB/TrEMBL;Acc:G4VR54]	_	_
SmVG_024701:Smp_175060	3.81751	4.19355	3.06904	3.12276	1.05152	1.48973	1.12509	1.06863	-1.58476	5e-05	0.000181778	5.43844	5.31701	4.906	4.35267	0.946934	1.42357	1.47433	1.2745	-1.10669	8.45972e-17	1.43373e-15	3.31898	3.1189	2.84189	2.51714	0.463893	0.797803	0.803601	0.685662	-1.56043	5.585e-19	7.57319e-18		hypothetical protein;Smp_175060	Putative uncharacterized protein [Source:UniProtKB/TrEMBL;Acc:G4VR53]	_	_
SmVG_024701:Smp_188230	3.81751	4.19355	3.06904	3.12276	1.05152	1.48973	1.12509	1.06863	-1.58476	5e-05	0.000181778	5.43844	5.31701	4.906	4.35267	0.946934	1.42357	1.47433	1.2745	-1.10669	8.45972e-17	1.43373e-15	3.31898	3.1189	2.84189	2.51714	0.463893	0.797803	0.803601	0.685662	-1.56043	5.585e-19	7.57319e-18		hypothetical protein;Smp_188230	Putative uncharacterized protein [Source:UniProtKB/TrEMBL;Acc:G4VR55]	_	_
Smp_153100	3.25125	3.13455	3.5479	3.71391	0.847337	1.12525	1.1681	1.4108	-1.58424	5e-05	0.000181778	3.35488	3.97414	4.46953	4.03358	0.653266	1.16358	0.8574	1.34934	-1.13936	1.11615e-21	2.82965e-20	2.14455	2.45435	2.72764	2.46018	0.344827	0.685665	0.488388	0.791138	-1.57744	3.84507e-20	5.69797e-19	GO:0005216,GO:0005249,GO:0005887,GO:0006810,GO:0006811,GO:0006813,GO:0016020,GO:0016021,GO:0034220,GO:0042391,GO:0055085,GO:0071805	hyperpolarization activated cyclic;Smp_153100	Putative potassium/sodium hyperpolarization-activated cyclic nucleotide-gated channel [Source:UniProtKB/TrEMBL;Acc:G4VMU7]	gi|156071470|ref|NP_001185.3|	potassium/sodium hyperpolarization-activated cyclic nucleotide-gated channel 2 [Homo sapiens]
Smp_137580	32.4473	25.8471	27.4125	30.9252	8.09455	8.31471	13.8912	8.74157	-1.57887	5e-05	0.000181778	38.7524	52.3315	44.233	45.36	8.28596	17.8604	8.21352	10.7501	-1.17616	5.47178e-16	8.54471e-15	23.1467	30.01	25.1741	25.4636	4.03987	9.87885	4.32033	5.74665	-1.60911	2.89237e-21	4.58634e-20	GO:0003676,GO:0004386,GO:0005524,GO:0008026,GO:0016787,GO:0016818	helicase ski2w;Smp_137580	Helicase, putative [Source:UniProtKB/TrEMBL;Acc:G4LX09]	gi|67782311|ref|NP_008860.4|	helicase SKI2W [Homo sapiens]
Smp_040510	36.6472	45.0822	37.8314	40.054	12.1762	14.2933	12.4934	14.4762	-1.57863	5e-05	0.000181778	52.0839	45.8371	47.3211	45.0684	8.98019	12.1408	10.3179	13.1285	-1.20026	9.08387e-77	2.43309e-74	31.6453	26.6071	27.2188	25.6989	4.39151	6.78871	5.49971	7.04596	-1.69527	8.39489e-63	9.5038e-61	GO:0006487,GO:0016740,GO:0016757,GO:0030144	alpha 1%2C6 mannosylglycoprotein;Smp_040510	Putative alpha-mannoside beta-1,6-n-acetylglucosaminyltransferase [Source:UniProtKB/TrEMBL;Acc:G4VB58]	gi|4505167|ref|NP_002401.1|	alpha-1,6-mannosylglycoprotein 6-beta-N-acetylglucosaminyltransferase A [Homo sapiens]
Smp_168990	5.45745	3.94965	4.98805	4.46786	1.32583	1.62252	2.07295	1.30916	-1.57518	5e-05	0.000181778	6.84807	8.52297	8.59838	7.16809	1.66978	3.23171	1.8339	2.56169	-0.97114	1.45954e-14	1.99811e-13	4.35874	5.16104	5.14701	4.24295	0.874264	1.89468	1.03173	1.44128	-1.33246	1.42826e-16	1.61692e-15	GO:0016020,GO:0016021	hypothetical protein;note=tmhmm%3B%3Bquery 1-422%3B;Smp_168990	Putative uncharacterized protein [Source:UniProtKB/TrEMBL;Acc:G4VNP0]	_	_
SmVG_033761:Smp_139280	12.8944	11.0414	11.9488	12.117	4.74195	4.09751	4.92027	2.37559	-1.57286	5e-05	0.000181778	11.7122	14.871	14.2591	12.5102	2.98335	4.59167	2.58457	2.01766	-1.25335	2.17413e-12	2.44412e-11	7.50554	9.09222	8.72634	7.52123	1.59879	2.73824	1.55434	1.21323	-1.68921	4.27421e-18	5.41845e-17		hypothetical protein;Smp_139280	Putative uncharacterized protein [Source:UniProtKB/TrEMBL;Acc:G4M1F6]	_	_
SmVG_033761:Smp_175730	12.8944	11.0414	11.9488	12.117	4.74195	4.09751	4.92027	2.37559	-1.57286	5e-05	0.000181778	11.7122	14.871	14.2591	12.5102	2.98335	4.59167	2.58457	2.01766	-1.25335	2.17413e-12	2.44412e-11	7.50554	9.09222	8.72634	7.52123	1.59879	2.73824	1.55434	1.21323	-1.68921	4.27421e-18	5.41845e-17		hypothetical protein;Smp_175730	Putative uncharacterized protein [Source:UniProtKB/TrEMBL;Acc:G4M1F4]	_	_
Smp_199490	2.90177	2.21151	3.13537	2.95514	1.07409	0.688499	1.05267	0.952845	-1.57208	5e-05	0.000181778	2.18476	3.17503	3.55017	3.14503	0.77806	0.86843	0.452419	0.87159	-1.12159	3.55473e-06	1.73114e-05	1.43076	1.99795	2.17306	1.87606	0.429878	0.539719	0.241606	0.46677	-1.56579	5.78375e-09	3.02258e-08	GO:0007275,GO:0016020,GO:0016021,GO:0016301,GO:0016310	diacylglycerol kinase zeta iota;Smp_199490
Smp_121960	6.5056	6.79845	5.47763	7.17005	2.07397	2.21627	2.19555	2.2505	-1.57074	5e-05	0.000181778	6.43543	6.65995	6.59377	7.00503	1.30342	1.89918	1.32465	1.83453	-1.18311	1.50334e-23	4.21929e-22	4.1758	4.13507	4.08134	4.30424	0.761057	1.18859	0.787854	1.07538	-1.61507	1.46062e-28	3.73243e-27	GO:0005515,GO:0016020,GO:0016021	leucine rich repeat containing protein 4;Smp_121960	Putative uncharacterized protein [Source:UniProtKB/TrEMBL;Acc:G4VFE7]	_	_
Smp_150180	2.40117	2.3676	2.56365	2.20462	0.510334	0.92793	1.01152	0.762327	-1.57002	5e-05	0.000181778	2.88978	3.01934	3.24444	2.81049	0.451877	1.02856	0.747761	0.859379	-1.12016	4.53718e-10	3.88752e-09	1.77856	1.77449	1.85813	1.6196	0.223055	0.567966	0.407818	0.457726	-1.52996	4.12673e-15	4.11237e-14	GO:0001588,GO:0001963,GO:0004930,GO:0007186,GO:0007191,GO:0007612,GO:0016020,GO:0016021,GO:0035240,GO:0060158	octopamine receptor oamb;Smp_150180	Putative amine GPCR [Source:UniProtKB/TrEMBL;Acc:G4VF14]	gi|4503385|ref|NP_000786.1|	D(2) dopamine receptor isoform long [Homo sapiens]
Smp_180500	1.64353	1.47761	1.57476	1.52171	0.440925	0.67321	0.48468	0.495781	-1.56969	5e-05	0.000181778	2.42069	2.69823	2.53866	2.70892	0.552339	0.887586	0.760136	0.715129	-1.0177	8.97691e-15	1.2583e-13	1.47417	1.60274	1.46222	1.48602	0.270955	0.45524	0.409083	0.34061	-1.49604	4.59605e-20	6.75939e-19	GO:0016020,GO:0017121,GO:0017128	phospholipid scramblase;Smp_180500	Phospholipid scramblase-related [Source:UniProtKB/TrEMBL;Acc:G4M0E1]	gi|10863877|ref|NP_066928.1|	phospholipid scramblase 1 [Homo sapiens]
Smp_145510	6.65208	7.12908	6.73976	8.40828	2.65119	2.07024	2.52875	2.49678	-1.5695	5e-05	0.000181778	17.061	16.561	18.334	18.65	3.69169	5.13887	3.24835	4.96322	-1.17591	1.04869e-44	8.67172e-43	10.6038	9.92614	10.9091	10.9213	1.82615	2.9225	1.78907	2.71763	-1.65745	2.66131e-44	1.39304e-42	GO:0000164,GO:0005515,GO:0046579	leucine rich repeat protein soc 2;Smp_145510	Putative shoc2 [Source:UniProtKB/TrEMBL;Acc:G4VIX9]	gi|21361633|ref|NP_060238.3|	leucine-rich repeat-containing protein 40 [Homo sapiens]
Smp_156220	6.01306	4.45671	3.29991	4.48185	1.62094	1.10939	1.89515	1.53511	-1.56687	5e-05	0.000181778	5.00188	7.00995	4.57576	5.13045	1.21922	1.88018	0.938963	1.46261	-1.12879	1.61986e-15	2.4369e-14	3.13139	4.18766	2.74769	3.03685	0.616891	1.08742	0.52738	0.826996	-1.58046	2.40818e-17	2.87329e-16	GO:0004721,GO:0004725,GO:0005515,GO:0006470,GO:0016311,GO:0016787,GO:0016791,GO:0035335	receptor type tyrosine protein phosphatase delta;Smp_156220	Putative receptor tyrosine phosphatase type r2a [Source:UniProtKB/TrEMBL;Acc:G4VMG9]	gi|4506309|ref|NP_002830.1|	receptor-type tyrosine-protein phosphatase delta isoform 1 precursor [Homo sapiens]
Smp_134960	10.2167	10.6502	10.2206	9.02616	4.28851	3.37637	2.97037	2.91552	-1.56572	5e-05	0.000181778	8.41388	10.2755	10.2507	7.35071	0.869816	1.34433	0.674132	0.898811	-2.00285	7.46311e-18	1.39112e-16	6.22627	6.19105	6.34033	4.98917	1.35555	1.42909	1.12232	1.34305	-1.65468	2.94996e-24	5.83756e-23	GO:0004930,GO:0007186,GO:0016020,GO:0016021	peptide (allatostatin:somatostatin);note=pfam_scan%3BPfam:PF00001.16%3B%3BE()%3D1.9E-8%3Bscore%3D33.6%3Bque ry 20-121%3Bdescription%3D7tm_1;Smp_134960	Putative uncharacterized protein [Source:UniProtKB/TrEMBL;Acc:G4VFU3]	_	_
Smp_128220	19.4803	18.5514	15.9573	18.7252	5.57806	5.61929	7.61407	5.7737	-1.56445	5e-05	0.000181778	29.94	34.115	29.8652	30.1508	5.85482	10.1529	5.5534	7.2652	-1.22363	3.99288e-38	2.65926e-36	18.585	20.3063	17.5683	17.5749	2.91816	5.77275	3.03529	3.96805	-1.70719	2.80411e-43	1.42936e-41	GO:0005515,GO:0016020,GO:0016021	neurogenic locus notch;Smp_128220	Putative pro-neuregulin-4, membrane-bound isoform (Pro-NRG4) [Source:UniProtKB/TrEMBL;Acc:G4VD78]	gi|134244285|ref|NP_000426.2|	neurogenic locus notch homolog protein 3 precursor [Homo sapiens]
Smp_212450	49.3982	61.6103	61.8691	66.9326	14.3962	25.2154	18.1949	23.3122	-1.56379	5e-05	0.000181778	124.249	115.517	128.088	136.206	23.9988	33.608	28.3221	36.6957	-1.14069	7.31645e-48	6.72731e-46	85.4444	75.6194	78.4102	83.6629	14.1517	21.2687	16.1206	21.9415	-1.58082	2.42042e-47	1.4369e-45	GO:0016020,GO:0016021,GO:0016788	placental protein 11;Smp_212450	Putative uncharacterized protein [Source:UniProtKB/TrEMBL;Acc:G4LY12]	gi|289063433|ref|NP_001165910.1|	poly(U)-specific endoribonuclease isoform 1 precursor [Homo sapiens]
Smp_153000	50.2394	44.4661	47.265	49.6656	14.4964	15.7354	17.7788	16.8277	-1.56345	5e-05	0.000181778	62.2846	72.9595	73.5587	68.4967	14.0217	23.607	15.8648	21.1487	-1.07158	1.15863e-62	1.83019e-60	37.3366	41.9563	41.8808	38.8513	6.93241	13.1152	8.35356	11.2313	-1.49368	3.12516e-49	2.00175e-47		hypothetical protein;Smp_153000	Putative uncharacterized protein [Source:UniProtKB/TrEMBL;Acc:G4VMV6]	_	_
Smp_125440	3.0142	2.4339	2.54121	2.44391	0.811969	0.874936	0.919126	0.937445	-1.55795	5e-05	0.000181778	2.59399	3.4307	2.96982	2.58094	0.564616	0.84772	0.593789	0.850347	-1.14526	3.19733e-17	5.57204e-16	1.64018	2.09041	1.80721	1.55414	0.296835	0.50712	0.340617	0.483462	-1.60804	1.42397e-22	2.45376e-21	GO:0005856	FERM domain containing protein 5;Smp_125440	Putative 4.1 G protein [Source:UniProtKB/TrEMBL;Acc:G4V6U7]	gi|117500790|ref|NP_777598.3|	FERM domain-containing protein 3 [Homo sapiens]
Smp_132610	31.0933	27.7203	25.2441	27.8622	9.10369	8.94862	12.8627	7.13143	-1.55663	5e-05	0.000181778	26.3202	33.0848	22.3907	26.0457	5.00722	9.37024	3.59755	4.19524	-1.38125	2.60689e-11	2.59029e-10	17.0646	20.043	16.3331	16.185	3.03386	6.46824	2.9756	3.19736	-1.64592	2.72542e-21	4.32865e-20	GO:0016020,GO:0016021	hypothetical protein;Smp_132610	Putative uncharacterized protein [Source:UniProtKB/TrEMBL;Acc:G4LUF0]	_	_
Smp_133880	4.31604	3.93975	3.32184	3.89937	1.07586	1.23637	1.66289	1.29624	-1.55388	5e-05	0.000181778	4.75762	5.4192	4.43122	4.65415	0.913955	1.81321	1.06895	1.44258	-1.07264	1.90612e-24	5.69378e-23	2.94542	3.28824	2.59016	2.75337	0.439188	0.991037	0.606067	0.765803	-1.53083	4.8925e-22	8.18444e-21	GO:0004866,GO:0005515,GO:0005576,GO:0005615,GO:0010951	cd109 antigen;Smp_133880	Putative alpha-2-macroglobulin [Source:UniProtKB/TrEMBL;Acc:G4VNG4]	gi|118600977|ref|NP_056507.2|	C3 and PZP-like alpha-2-macroglobulin domain-containing protein 8 [Homo sapiens]
Smp_125510	4.59977	4.04293	3.89079	3.78182	1.41667	1.3312	1.53987	1.27901	-1.55132	5e-05	0.000181778	4.60972	5.73825	4.92668	4.38449	1.11725	1.61123	0.983146	1.33015	-1.11155	2.42164e-28	9.32408e-27	2.84803	3.41237	2.86653	2.56513	0.557937	0.925201	0.554861	0.711903	-1.55586	6.24489e-28	1.52382e-26	GO:0005509,GO:0005886,GO:0007155,GO:0007156,GO:0016020,GO:0016021	cadherin;Smp_125510	Putative cadherin [Source:UniProtKB/TrEMBL;Acc:G4VDC4]	_	_
Smp_077610	53.4471	91.6131	53.1717	64.0216	14.2301	29.2664	21.3391	24.9822	-1.54589	5e-05	0.000181778	105.989	68.0781	69.8768	75.7548	11.8652	22.7209	21.2606	25.084	-1.12181	9.98042e-11	9.35835e-10	67.7702	41.9263	42.6461	46.0733	6.2245	13.5817	12.4979	14.6253	-1.58087	1.79479e-14	1.68669e-13	GO:0016020,GO:0016021	hypothetical protein;Smp_077610	Putative uncharacterized protein [Source:UniProtKB/TrEMBL;Acc:G4VL55]	_	_
Smp_060570	58.1554	62.5453	53.4242	58.6477	19.5652	20.3779	23.1492	16.765	-1.54343	5e-05	0.000181778	62.6081	62.2085	60.8871	59.4915	14.0632	21.4682	14.4455	15.0216	-1.07578	2.22796e-45	1.89316e-43	39.1003	37.1728	36.0302	34.8654	7.17504	12.2825	7.94348	8.23272	-1.50985	3.5392e-43	1.78537e-41	GO:0016020,GO:0016021	hypothetical protein;Smp_060570	Putative sarg904 [Source:UniProtKB/TrEMBL;Acc:G4V6I2]	gi|307611943|ref|NP_001091984.2|	hypothetical protein LOC146556 isoform 2 precursor [Homo sapiens]
SmVG_030993	25.7941	25.895	21.0251	19.6564	7.95624	6.65483	9.87884	7.23425	-1.54185	5e-05	0.000181778	148.322	161.149	132.593	149.484	50.446	68.109	39.8657	51.7164	-0.770523	2.08455e-15	3.10189e-14	96.8274	101.987	82.3726	91.6491	27.2824	41.012	23.3946	30.0401	-1.07082	2.78837e-18	3.60047e-17	GO:0005509
Smp_136440	2.02121	1.75939	1.34512	1.89394	0.587655	0.679816	0.433457	0.713738	-1.53958	0.0073	0.016705	1.86826	2.03979	1.71802	1.94077	0.555527	0.525646	0.867345	0.96658	-0.723346	2.21164e-05	9.30021e-05	1.24787	1.34305	1.03476	1.21229	0.313728	0.302182	0.487149	0.562893	-1.01673	9.90065e-06	3.26202e-05	GO:0005216,GO:0005249,GO:0005887,GO:0006810,GO:0006811,GO:0006813,GO:0016020,GO:0016021,GO:0034220,GO:0042391,GO:0055085,GO:0071805,GO:0008076	voltage gated potassium channel;Smp_136440	Putative voltage-gated potassium channel [Source:UniProtKB/TrEMBL;Acc:G4VT55]	gi|27437001|ref|NP_758872.1|	potassium voltage-gated channel subfamily H member 1 isoform 1 [Homo sapiens]
Smp_129060	28.1136	28.0559	26.4215	28.0544	9.22282	10.3755	9.07401	9.44423	-1.53746	5e-05	0.000181778	30.8395	33.0703	32.8433	30.9496	6.57206	9.12706	7.92827	9.27216	-1.10151	7.22957e-49	7.01382e-47	19.4667	20.4126	19.7878	18.3329	3.39574	5.34561	4.33338	5.15769	-1.56798	3.73825e-65	4.66611e-63	GO:0006820,GO:0016020,GO:0016021,GO:0022857,GO:0030672,GO:0055085	solute carrier family 17;Smp_129060	Putative solute carrier family 17, member 7 (Vesicular glutamate transporter) [Source:UniProtKB/TrEMBL;Acc:G4V9I0]	gi|21322234|ref|NP_647480.1|	vesicular glutamate transporter 3 isoform 1 [Homo sapiens]
Smp_123370	3.88365	3.37399	3.01883	3.33715	1.12011	1.00667	1.32317	1.24447	-1.53603	5e-05	0.000181778	3.42907	4.47942	3.61722	3.33997	0.779547	1.32721	0.748588	1.16192	-1.06754	9.14691e-17	1.54382e-15	2.17867	2.71479	2.22968	2.0338	0.438924	0.822575	0.456444	0.658545	-1.40554	4.00761e-18	5.09374e-17		serine rich repeat protein 2;Smp_123370	Metacaspase 2, putative [Source:UniProtKB/TrEMBL;Acc:G4LVL1]	_	_
Smp_020340	5.74308	4.98896	5.30609	5.21918	1.48077	2.2108	2.17919	1.46517	-1.53491	5e-05	0.000181778	8.06642	9.85204	8.67457	8.69161	1.66421	2.85294	2.06402	1.85045	-1.18934	3.0591e-31	1.37059e-29	5.1624	6.13737	5.44874	5.35932	0.940497	1.7781	1.21386	1.15848	-1.57738	2.87513e-35	1.06031e-33	GO:0000023,GO:0003824,GO:0004553,GO:0004558,GO:0005975,GO:0008152,GO:0016787,GO:0016798,GO:0030246,GO:0032450	alpha glucosidase;Smp_020340	Putative alpha-glucosidase [Source:UniProtKB/TrEMBL;Acc:G4V8C4]	gi|221316699|ref|NP_004659.2|	maltase-glucoamylase, intestinal [Homo sapiens]
Smp_174920	2.01255	1.80139	1.23803	1.75618	0.524775	0.466801	0.977212	0.388489	-1.53014	0.02295	0.0454572	3.83722	3.91716	3.23548	3.31565	1.12255	1.96088	0.985233	0.787754	-0.86829	1.01681e-05	4.57563e-05	2.23115	2.25199	1.7926	1.854	0.515915	1.07682	0.475279	0.449369	-1.14593	3.63955e-07	1.49387e-06	GO:0004497,GO:0004505,GO:0005506,GO:0009072,GO:0016491,GO:0016714,GO:0055114	tryptophan hydroxylase;Smp_174920	Putative tyrosine/tryptophan monooxygenase [Source:UniProtKB/TrEMBL;Acc:G4VR64]	gi|4759248|ref|NP_004170.1|	tryptophan 5-hydroxylase 1 [Homo sapiens]
Smp_134990	1.23661	1.77594	2.16513	1.41405	0.552685	0.680438	0.490489	0.563707	-1.527	5e-05	0.000181778	3.07094	2.82979	4.04679	2.75358	0.689116	0.825876	0.790808	0.946627	-1.09565	1.5808e-26	5.27832e-25	1.87557	1.671	2.41256	1.59789	0.34383	0.479412	0.431116	0.528924	-1.54765	2.38281e-21	3.82823e-20	GO:0005215,GO:0016020,GO:0016021,GO:0034220,GO:0055085	oxalate:formate antiporter;note=pfam_scan%3BPfam:PF07690.11%3B%3BE()%3D9.8E-9%3Bscore%3D34.2%3Bque ry 17-185%3Bdescription%3DMFS_1;note=iprscan%3BInterPro:IPR011701 : Major facilitator superfamily MFS-1%3BPfam:PF07690%3B%3Bscore%3D2.1E-7%3Bquery 1-126%3Bdescription%3DMajor facilitator superfamily MFS-1;Smp_134990
SmVG_023508:Smp_011990	37.4695	44.1873	39.562	51.5982	15.3315	17.7351	15.7245	11.1921	-1.52662	5e-05	0.000181778	65.8647	59.289	65.9303	74.8064	16.0697	20.284	17.2273	14.2573	-1.10364	8.0688e-22	2.07548e-20	40.1761	34.7057	38.3511	43.1495	8.04932	11.4418	9.34386	7.74914	-1.55728	2.25747e-28	5.63557e-27		beta galactosidase;Smp_011990	Putative beta-galactosidase [Source:UniProtKB/TrEMBL;Acc:G4VRZ7]	gi|40255043|ref|NP_078782.3|	beta-galactosidase-1-like protein precursor [Homo sapiens]
SmVG_023508:Smp_177540	37.4695	44.1873	39.562	51.5982	15.3315	17.7351	15.7245	11.1921	-1.52662	5e-05	0.000181778	65.8647	59.289	65.9303	74.8064	16.0697	20.284	17.2273	14.2573	-1.10364	8.0688e-22	2.07548e-20	40.1761	34.7057	38.3511	43.1495	8.04932	11.4418	9.34386	7.74914	-1.55728	2.25747e-28	5.63557e-27		beta galactosidase;Smp_177540	Putative uncharacterized protein [Source:UniProtKB/TrEMBL;Acc:G4VRZ8]	gi|40255043|ref|NP_078782.3|	beta-galactosidase-1-like protein precursor [Homo sapiens]
Smp_168980	6.42098	5.73008	5.84729	5.92351	2.12873	1.92473	2.26732	1.9867	-1.52585	5e-05	0.000181778	9.49861	11.2943	10.9233	9.87219	2.43435	3.45138	2.2122	3.03338	-1.07094	2.04182e-42	1.57233e-40	5.92714	6.79436	6.4794	5.79292	1.22541	2.00678	1.21333	1.69113	-1.49549	1.67803e-47	1.00229e-45	GO:0016020,GO:0016021	adenylate cyclase;Smp_168980	Putative uncharacterized protein [Source:UniProtKB/TrEMBL;Acc:G4VNN9]	_	_
Smp_132840	4.36195	2.44534	2.3908	2.86331	1.24477	0.511914	1.13954	1.29753	-1.52409	5e-05	0.000181778	3.76112	6.12949	4.07398	4.43206	1.25779	1.27207	0.534599	1.29007	-1.18677	1.07312e-07	6.67434e-07	2.33586	3.70706	2.49562	2.64816	0.603074	0.743804	0.286389	0.742322	-1.66789	8.04301e-10	4.67224e-09	GO:0005515,GO:0005622,GO:0008270,GO:0046872	tripartite motif protein trim%3B tripartite motif containing protein;Smp_132840	Tripartite motif protein trim9, putative [Source:UniProtKB/TrEMBL;Acc:G4LUA6]	gi|134288906|ref|NP_001004342.3|	tripartite motif-containing protein 67 [Homo sapiens]
Smp_017730	255.61	234.06	243.903	264.92	78.9531	89.442	99.8546	80.4739	-1.51767	5e-05	0.000181778	264.277	322.827	302.841	302.78	59.8215	98.5065	65.2998	75.192	-1.14057	2.58169e-53	2.9728e-51	162.662	191.089	177.172	175.493	29.8582	55.8752	35.2357	40.7443	-1.60967	1.12449e-44	5.98254e-43	GO:0005515	200-kDa GPI-anchored surface glycoprotein;Smp_017730	200-kDa GPI-anchored surface glycoprotein [Source:UniProtKB/TrEMBL;Acc:G4VP56]	_	_
Smp_175720	7.77318	10.2039	6.70256	8.5762	3.19247	3.37812	2.50827	2.59065	-1.51086	5e-05	0.000181778	11.2622	9.11046	8.19335	9.71381	2.26396	2.3848	2.55268	2.30835	-1.12219	5.37893e-21	1.29949e-19	7.0464	5.5934	4.96047	5.79172	1.19815	1.39653	1.43179	1.323	-1.58298	3.46469e-19	4.80517e-18	GO:0005515	E3 ubiquitin protein ligase TRIM9;Smp_175720	Tripartite motif protein trim9, putative [Source:UniProtKB/TrEMBL;Acc:G4LUA5]	gi|190341104|ref|NP_055978.4|	E3 ubiquitin-protein ligase TRIM9 isoform 1 [Homo sapiens]
Smp_175090	93.6463	93.1597	84.3068	93.474	31.2844	32.4417	33.2941	31.0339	-1.50951	5e-05	0.000181778	149.016	162.087	149.956	151.137	33.5404	46.3781	34.9776	42.0209	-1.10808	2.66963e-65	4.5684e-63	89.1005	93.1619	85.1963	84.8157	15.9335	25.5958	18.0563	21.9379	-1.56048	8.5315e-69	1.23974e-66	GO:0001676,GO:0003824,GO:0004467,GO:0008152,GO:0016874	long-chain-fatty-acid--CoA ligase;Smp_175090.3	Long-chain-fatty-acid--CoA ligase [Source:UniProtKB/TrEMBL;Acc:G4VR44]	gi|327412329|ref|NP_001192180.1|	long-chain-fatty-acid--CoA ligase 6 isoform f [Homo sapiens]
Smp_152050	43.3462	50.3284	41.7574	44.1027	8.20689	21.6767	15.7905	17.4022	-1.50909	5e-05	0.000181778	74.1885	63.701	64.4054	63.3343	8.44094	21.5013	22.7157	23.5169	-1.05684	7.36431e-07	4.00069e-06	46.366	38.4098	38.3399	37.4473	4.27776	12.4418	12.5391	12.8538	-1.41304	4.02829e-10	2.42545e-09	GO:0005887,GO:0007166,GO:0016020,GO:0016021	tetraspanin similiar to uroplakin 1;Smp_152050	Putative tetraspanin 18, isoform 1 [Source:UniProtKB/TrEMBL;Acc:G4VB93]	_	_
SmVG_014758:Smp_160380	1.88476	1.49343	1.39662	1.40128	0.699947	0.364961	0.702279	0.402953	-1.50891	5e-05	0.000181778	2.98521	4.10531	3.08294	2.75243	1.01637	1.45804	0.785364	1.08833	-0.841069	5.06833e-12	5.45864e-11	1.96455	2.57598	1.96109	1.70649	0.568689	0.904651	0.460907	0.638646	-1.143	4.35832e-11	2.93855e-10		hypothetical protein;Smp_160380
SmVG_014758:Smp_160390	1.88476	1.49343	1.39662	1.40128	0.699947	0.364961	0.702279	0.402953	-1.50891	5e-05	0.000181778	2.98521	4.10531	3.08294	2.75243	1.01637	1.45804	0.785364	1.08833	-0.841069	5.06833e-12	5.45864e-11	1.96455	2.57598	1.96109	1.70649	0.568689	0.904651	0.460907	0.638646	-1.143	4.35832e-11	2.93855e-10		colorectal mutant cancer protein;note=predicted by EVM2;note=pfam_scan%3BPfam:PF10506.4%3B%3BE()%3D6.7E-6%3Bscore%3D25.7%3Bquer y 48-103%3Bdescription%3DMCC-bdg_PDZ;Smp_160390	Putative uncharacterized protein [Source:UniProtKB/TrEMBL;Acc:G4LW31]	_	_
SmVG_014758:Smp_168570	1.88476	1.49343	1.39662	1.40128	0.699947	0.364961	0.702279	0.402953	-1.50891	5e-05	0.000181778	2.98521	4.10531	3.08294	2.75243	1.01637	1.45804	0.785364	1.08833	-0.841069	5.06833e-12	5.45864e-11	1.96455	2.57598	1.96109	1.70649	0.568689	0.904651	0.460907	0.638646	-1.143	4.35832e-11	2.93855e-10		colorectal mutant cancer protein;Smp_168570	Putative uncharacterized protein [Source:UniProtKB/TrEMBL;Acc:G4LW29]	gi|146229340|ref|NP_001078846.1|	colorectal mutant cancer protein isoform 1 [Homo sapiens]
SmVG_029660	8.55479	8.81399	5.17114	7.19514	2.67351	2.74645	2.88766	2.15004	-1.50761	5e-05	0.000181778	8.63638	8.27734	6.00217	6.9946	1.72785	2.74764	1.82187	1.64947	-1.04281	1.58147e-07	9.50505e-07	6.01349	6.00597	3.70559	4.70827	1.0185	1.68049	1.18939	0.981253	-1.49699	2.28292e-09	1.2529e-08
SmVG_015816:Smp_171740	4.37452	3.52584	3.62524	4.29656	1.26388	1.32192	1.43783	1.54711	-1.506	5e-05	0.000181778	4.78759	6.17233	5.38406	5.80153	1.21923	1.7606	1.23181	1.83188	-1.05146	1.74044e-27	6.16206e-26	2.98686	3.67785	3.15226	3.34311	0.579994	1.01952	0.677436	0.983989	-1.49695	7.70781e-27	1.76989e-25		multidrug resistance associated protein 1;Smp_171740	Putative multidrug resistance protein 1 (ATP-binding cassette C1) [Source:UniProtKB/TrEMBL;Acc:G4VJ79]	gi|4557481|ref|NP_000383.1|	canalicular multispecific organic anion transporter 1 [Homo sapiens]
SmVG_015816:Smp_202530	4.37452	3.52584	3.62524	4.29656	1.26388	1.32192	1.43783	1.54711	-1.506	5e-05	0.000181778	4.78759	6.17233	5.38406	5.80153	1.21923	1.7606	1.23181	1.83188	-1.05146	1.74044e-27	6.16206e-26	2.98686	3.67785	3.15226	3.34311	0.579994	1.01952	0.677436	0.983989	-1.49695	7.70781e-27	1.76989e-25		hypothetical protein;note=tmhmm%3B%3Bquery 1-61%3B;note=%3Bquery 1-4%3B;note=%3Bquery 49-61%3B;note=%3Bquery 5-22%3B;note=%3Bquery 26-48%3B;note=%3Bquery 23-25%3B;Smp_202530
Smp_174690	24.3	22.3506	20.3645	22.9233	8.13191	6.5204	11.1539	6.0303	-1.49825	5e-05	0.000181778	31.2383	35.1706	28.311	29.4616	7.32557	11.3951	5.51695	6.56392	-1.16071	4.3626e-16	6.82994e-15	20.2451	22.1596	17.9252	18.7285	3.85711	7.01328	3.1857	4.00196	-1.60573	5.45427e-22	9.09294e-21	GO:0005622,GO:0006886	TOM1 protein 2 like;Smp_174690	Target of myb1 related (Tom1-related) [Source:UniProtKB/TrEMBL;Acc:G4VL94]	gi|131888135|ref|NP_001076437.1|	TOM1-like protein 2 isoform 3 [Homo sapiens]
SmVG_024264	4.81711	5.56446	7.5173	5.36429	2.37699	1.64987	1.96385	2.26569	-1.49446	5e-05	0.000181778	5.89103	5.03853	7.6988	5.79568	1.51866	1.87438	1.11856	1.67524	-1.11413	2.75945e-21	6.77274e-20	3.99112	3.41133	5.23059	3.62903	0.900376	1.14433	0.666571	1.07465	-1.54266	2.9422e-17	3.50186e-16	GO:0005262,GO:0016020,GO:0070588
Smp_179660	33.005	33.8772	27.6609	32.2346	8.97956	12.6878	13.7211	9.72499	-1.49067	5e-05	0.000181778	34.3113	35.6283	31.4401	32.4653	6.30309	12.5193	8.69917	8.67706	-1.07614	6.08572e-24	1.76428e-22	20.8161	20.8458	18.0925	18.5204	3.08914	7.00291	4.66322	4.62641	-1.4972	1.64278e-29	4.4305e-28	GO:0016020,GO:0016021	hypothetical protein;note=predicted by EVM2;note=tmhmm%3B%3Bquery 1-905%3B;note=%3Bquery 85-137%3B;note=%3Bquery 467-485%3B;note=%3Bquery 860-905%3B;note=%3Bquery 62-84%3B;note=%3Bquery 138-160%3B;note=%3Bquery 444-466%3B;note=%3Bquery 486-508%3B;note=%3Bquery 837-859%3B;note=%3Bquery 1-61%3B;note=%3Bquery 161-443%3B;note=%3Bquery 509-836%3B;Smp_179660	Putative uncharacterized protein [Source:UniProtKB/TrEMBL;Acc:G4VDS9]	_	_
Smp_076320	2.33395	2.25002	2.72281	2.65052	1.0203	0.395472	0.977122	1.15712	-1.48793	0.00025	0.000810166	2.80521	3.06943	3.74534	3.54272	0.930588	1.07579	0.295973	1.2398	-1.12321	6.81324e-05	0.000259012	1.68556	1.75501	2.14192	2.00655	0.449167	0.593039	0.158191	0.713298	-1.42151	6.9063e-07	2.71456e-06	GO:0003682	hypothetical protein;note=predicted by EVM2;note=pfam_scan%3BPfam:PF13873.1%3B%3BE()%3D2.9E-18%3Bscore%3D65.3%3Bque ry 15-93%3Bdescription%3DMyb_DNA-bind_5;Smp_076320	Putative uncharacterized protein [Source:UniProtKB/TrEMBL;Acc:G4LZ63]	_	_
Smp_174430	2.27727	1.96963	2.27809	2.88174	0.780227	1.14985	0.622171	0.804107	-1.4868	5e-05	0.000181778	2.50111	3.0398	3.06354	3.67415	0.498663	0.818109	0.778116	0.886455	-1.14736	7.47322e-09	5.48081e-08	1.57186	1.86344	1.83444	2.18499	0.260472	0.468416	0.407916	0.469953	-1.65854	2.40498e-12	1.84805e-11	GO:0007275,GO:0016021	hypothetical protein;note=pfam_scan%3BPfam:PF06638.6%3B%3BE()%3D2.5E-9%3Bscore%3D35.9%3Bquer y 109-216%3Bdescription%3DStrabismus;Smp_174430	Putative uncharacterized protein [Source:UniProtKB/TrEMBL;Acc:G4VBS4]	_	_
Smp_149320	18.2596	17.3811	14.1037	16.7673	6.42113	5.064	6.95749	5.31112	-1.48545	5e-05	0.000181778	23.4925	25.0571	21.0432	22.8697	7.17111	8.83642	4.29891	6.28258	-1.01107	2.63687e-12	2.93486e-11	14.4582	14.8634	12.36	13.108	3.5529	5.07613	2.32321	3.38377	-1.38226	3.39641e-16	3.73643e-15	GO:0003735,GO:0006412,GO:0006810,GO:0016020,GO:0016021,GO:0055085	tricarboxylate transport protein;Smp_149320	Putative tricarboxylate transport protein [Source:UniProtKB/TrEMBL;Acc:G4VIB0]	gi|13375983|ref|NP_078974.1|	mitochondrial glutamate carrier 1 [Homo sapiens]
Smp_134380	3.12741	3.38173	1.48972	1.28998	0.624435	1.00452	1.18934	0.502754	-1.48386	0.00065	0.001935	9.0375	7.87291	5.5807	5.51357	1.9145	3.64069	2.34571	2.78626	-0.684037	7.52753e-05	0.000283889	5.79881	4.84284	3.39562	3.38763	1.00607	2.14715	1.33899	1.58702	-0.975522	7.46884e-05	0.000210923	GO:0016020,GO:0016021	hypothetical protein;Smp_134380	Putative uncharacterized protein [Source:UniProtKB/TrEMBL;Acc:G4VQ14]	_	_
Smp_035040	3.48445	4.84248	4.12079	4.55192	1.14909	2.59291	0.979271	1.36198	-1.48259	5e-05	0.000181778	7.37601	5.37724	7.71036	6.59447	1.8233	1.81014	2.98645	3.10473	-0.773646	1.27518e-05	5.6233e-05	4.74106	3.26506	4.61506	3.95775	0.968281	1.05582	1.76777	1.78051	-1.04609	2.05961e-05	6.40854e-05	GO:0005515,GO:0016020,GO:0016021	hypothetical protein;Smp_035040	Putative uncharacterized protein [Source:UniProtKB/TrEMBL;Acc:G4V824]	_	_
SmVG_028951:Smp_167440	2.95577	2.32416	2.16809	1.98691	1.01494	0.390774	1.08376	0.886933	-1.48252	5e-05	0.000181778	2.65327	3.37674	2.71649	2.28339	0.705617	1.0714	0.249836	0.897238	-1.1774	5.06469e-05	0.000198227	1.62344	2.05191	1.63824	1.31179	0.351419	0.613083	0.162413	0.486105	-1.48902	7.50071e-10	4.37432e-09		hypothetical protein;Smp_167440	Putative uncharacterized protein [Source:UniProtKB/TrEMBL;Acc:G4LXJ6]	_	_
SmVG_028951:Smp_167450	2.95577	2.32416	2.16809	1.98691	1.01494	0.390774	1.08376	0.886933	-1.48252	5e-05	0.000181778	2.65327	3.37674	2.71649	2.28339	0.705617	1.0714	0.249836	0.897238	-1.1774	5.06469e-05	0.000198227	1.62344	2.05191	1.63824	1.31179	0.351419	0.613083	0.162413	0.486105	-1.48902	7.50071e-10	4.37432e-09		acid sensing ion channel 4 pituitary;Smp_167450	Acid sensing ion channel 4, pituitary, putative [Source:UniProtKB/TrEMBL;Acc:G4LXJ7]	_	_
Smp_133210	8.77143	7.78915	7.48436	8.80055	2.995	2.8543	3.21992	2.69391	-1.48142	5e-05	0.000181778	16.9242	19.2982	17.1132	19.6304	4.87079	5.81283	4.53979	5.46054	-0.996918	1.7302e-25	5.42437e-24	11.2654	12.3139	10.9367	12.276	2.50983	3.61565	2.4181	3.08861	-1.42457	6.448e-29	1.6967e-27	GO:0000023,GO:0003824,GO:0004553,GO:0004558,GO:0005975,GO:0008152,GO:0016787,GO:0016798,GO:0030246,GO:0032450	lysosomal alpha glucosidase;Smp_133210
SmVG_007629	3.35282	4.10991	4.25952	3.55275	1.13292	2.27948	0.78462	1.27786	-1.48027	5e-05	0.000181778	2.23841	2.52317	3.01552	2.2186	0.50672	0.406656	0.662915	0.752849	-1.18138	2.03681e-07	1.20247e-06	3.08729	2.40562	3.05727	2.55381	0.445101	0.456442	0.832874	0.796577	-1.61177	1.28454e-10	8.1315e-10
Smp_198050	15.0994	10.3926	8.49359	10.653	4.73895	2.74791	3.8864	4.64369	-1.47869	5e-05	0.000181778	12.6893	19.4461	11.7457	12.7197	4.03219	4.10739	2.44412	4.81826	-1.04826	7.6631e-10	6.40116e-09	8.01057	11.8242	7.18843	7.61978	1.99834	2.52038	1.29399	2.70313	-1.4811	1.29482e-13	1.12557e-12	GO:0003779,GO:0005515,GO:0051015	filamin;Smp_198050	Filamin-related [Source:UniProtKB/TrEMBL;Acc:G4VHV6]	gi|116805322|ref|NP_001449.3|	filamin-C isoform a [Homo sapiens]
Smp_156820	1.3016	1.67404	1.45548	2.19705	0.497832	0.454845	0.806302	0.621768	-1.4772	5e-05	0.000181778	2.08193	1.81513	2.24535	2.54549	0.463964	0.736839	0.348319	0.572946	-1.14962	1.74311e-06	8.91898e-06	1.32491	1.10453	1.35139	1.51952	0.241477	0.430564	0.1963	0.321869	-1.59893	6.2045e-10	3.64997e-09		normocyte binding protein 2a;note=predicted by EVM2;Smp_156820	Normocyte binding protein 2a, putative [Source:UniProtKB/TrEMBL;Acc:G4LZ32]	_	_
Smp_160740	52.7502	48.2369	49.3483	50.8307	17.1286	15.699	22.0536	17.4194	-1.47631	5e-05	0.000181778	70.6346	81.1507	79.2932	72.7237	18.8808	30.8777	18.2046	25.494	-0.935427	9.47184e-43	7.33978e-41	44.0871	48.9835	47.048	42.7999	9.64583	17.8184	10.0247	14.0551	-1.31188	8.16261e-37	3.15955e-35	GO:0016020,GO:0016021	choline transporter protein 2;Smp_160740
Smp_163970	30.9855	30.1909	25.4402	28.413	9.25819	11.5586	10.7651	9.88477	-1.47198	5e-05	0.000181778	36.2443	38.9109	33.8052	34.7451	7.92299	11.7313	9.76035	10.7677	-1.02114	1.4323e-49	1.47062e-47	22.2688	22.8828	19.6865	20.0884	3.95144	6.65504	5.32008	5.83957	-1.43969	3.93783e-47	2.29573e-45	GO:0004180,GO:0004185,GO:0006508,GO:0008233,GO:0016787,GO:0051603	lysosomal protective protein;Smp_163970	Family S10 non-peptidase homologue (S10 family) [Source:UniProtKB/TrEMBL;Acc:G4VL47]	gi|119395729|ref|NP_000299.2|	lysosomal protective protein isoform a precursor [Homo sapiens]
Smp_127860	6.08038	5.40134	5.70166	5.50849	1.76866	2.25919	2.03602	2.12184	-1.471	5e-05	0.000181778	4.54554	5.38873	5.46018	4.64433	1.04948	1.53177	1.26055	1.59865	-1.04813	7.85597e-17	1.33508e-15	2.94607	3.37608	3.32832	2.83682	0.556714	0.905586	0.723489	0.900487	-1.49793	7.57272e-24	1.44282e-22	GO:0016020,GO:0016021	fmrfamide receptor;Smp_127860	_	_	_
Smp_142620	12.6298	10.5748	10.84	11.2239	4.04747	3.25608	4.98278	4.06058	-1.46949	5e-05	0.000181778	11.2854	14.5009	12.6673	11.7868	2.89838	4.79256	2.44102	3.7292	-1.05698	2.00579e-23	5.57862e-22	6.89273	8.51823	7.42145	6.80409	1.44827	2.7079	1.31044	2.05203	-1.46452	1.35228e-28	3.47384e-27	GO:0000166,GO:0004016,GO:0004383,GO:0004672,GO:0005524,GO:0005886,GO:0006182,GO:0006468,GO:0007165,GO:0008074,GO:0009190,GO:0016020,GO:0016021,GO:0016301,GO:0016310,GO:0016772,GO:0016829,GO:0016849,GO:0035556	atrial natriuretic peptide receptor 1;Smp_142620	Guanylate cyclase [Source:UniProtKB/TrEMBL;Acc:G4V651]	gi|167830411|ref|NP_000897.3|	atrial natriuretic peptide receptor 1 precursor [Homo sapiens]
Smp_156910	163.503	128.507	128.636	141.024	51.263	42.8344	66.3725	42.5297	-1.46825	5e-05	0.000181778	152.984	211.738	170.806	170.503	39.7588	69.1782	32.3166	42.0731	-1.12224	1.14247e-15	1.75298e-14	96.6357	128.415	102.778	101.857	20.6767	40.3143	18.4377	23.6371	-1.56233	9.834e-21	1.51974e-19		hypothetical protein;Smp_156910	Putative uncharacterized protein [Source:UniProtKB/TrEMBL;Acc:G4VKB9]	_	_
Smp_181260	5.39421	3.05728	2.65494	3.5035	1.44388	0.632016	1.92975	1.29463	-1.46281	5e-05	0.000181778	3.00308	5.31606	3.0468	3.33128	0.955244	1.77519	0.393283	1.09347	-1.08873	0.000355188	0.00116514	1.91012	3.29691	1.85436	2.03116	0.529122	1.04996	0.238987	0.643615	-1.39035	4.75371e-06	1.64823e-05		hypothetical protein;Smp_181260	Putative uncharacterized protein [Source:UniProtKB/TrEMBL;Acc:G4VGC4]	_	_
Smp_156770	296.77	255.925	239.55	302.54	99.529	77.9534	142.172	77.57	-1.46262	5e-05	0.000181778	343.064	429.176	348.964	410.13	91.3687	167.613	67.9384	86.0415	-1.10365	3.37672e-10	2.94026e-09	208.832	251.477	200.955	234.187	44.3039	93.5895	35.6129	45.4396	-1.51629	6.64723e-14	5.93194e-13		major tegumental antigen SM15;Smp_156770	Major tegumental antigen SM15; Putative major tegumental antigen SM15 [Source:UniProtKB/TrEMBL;Acc:Q05645]	_	_
Smp_064750	21.5954	19.3041	21.1838	19.9809	7.3249	6.7056	8.42382	7.35261	-1.46111	5e-05	0.000181778	22.4268	26.639	27.017	22.9954	5.63251	8.6656	5.33758	7.19014	-1.0629	7.32341e-59	1.00258e-56	13.8025	15.7886	15.7876	13.3801	2.82569	4.91161	2.86835	3.94244	-1.49505	1.1569e-49	7.50908e-48	GO:0004594,GO:0005524,GO:0015937,GO:0016301,GO:0016310,GO:0016740	pantothenate kinase 4;Smp_064750	Putative pantothenate kinase [Source:UniProtKB/TrEMBL;Acc:G4VQ30]	gi|8922665|ref|NP_060686.1|	pantothenate kinase 4 [Homo sapiens]
SmVG_025004	24.0268	13.0615	8.98928	14.4975	5.38544	3.82741	7.83837	5.01757	-1.45672	5e-05	0.000181778	19.8963	37.7278	14.8293	21.3918	5.83075	11.0524	3.54109	6.61973	-0.977895	0.000342744	0.00112913	12.4354	23.2567	8.77977	12.4338	2.78978	6.08394	1.71724	3.25421	-1.4207	7.75668e-06	2.59783e-05
Smp_103610	508.386	773.761	677.757	828.683	135.163	410.184	190.004	282.027	-1.45468	5e-05	0.000181778	1602.45	1174.5	1480.81	1687.23	165.681	333.894	560.604	464.057	-1.17412	1.35546e-05	5.94542e-05	1102.96	784.376	981.592	1113.37	91.9815	211.721	338.337	280.901	-1.56236	2.71221e-07	1.14016e-06	GO:0004197,GO:0005615,GO:0005764,GO:0006508,GO:0008233,GO:0008234,GO:0016787,GO:0050790,GO:0051603	cathepsin B peptidase (C01 family);Smp_103610	Cathepsin B-like cysteine proteinase [Source:UniProtKB/Swiss-Prot;Acc:P25792]	gi|22538431|ref|NP_680090.1|	cathepsin B preproprotein [Homo sapiens]
Smp_159920	2.31833	2.10765	1.78968	1.83911	0.764298	0.675584	0.792225	0.707538	-1.4542	5e-05	0.000181778	2.74931	3.30655	2.94807	2.37983	0.679199	1.07783	0.62355	0.98411	-0.97494	6.78974e-15	9.64895e-14	1.71039	1.91042	1.73195	1.39896	0.333717	0.582946	0.325624	0.501992	-1.42879	1.14033e-18	1.52503e-17	GO:0005509,GO:0005886,GO:0007155,GO:0007156,GO:0016020,GO:0016021,GO:0030246	protocadherin 11;Smp_159920	Cadherin, putative [Source:UniProtKB/TrEMBL;Acc:G4LVZ1]	gi|14589944|ref|NP_116754.1|	protocadherin-11 Y-linked isoform b [Homo sapiens]
Smp_149720	40.5719	44.9156	34.3374	35.284	16.5924	9.16645	20.5243	10.3281	-1.45412	5e-05	0.000181778	94.6159	110.022	87.1148	70.7606	16.9425	35.0336	10.0407	14.7365	-1.36949	1.3115e-08	9.25488e-08	58.5454	65.3778	51.4847	40.8075	8.5926	19.8331	5.47442	7.91343	-1.8271	2.33329e-12	1.7997e-11		hypothetical protein;note=predicted by EVM2;Smp_149720	Putative uncharacterized protein [Source:UniProtKB/TrEMBL;Acc:G4LY17]	_	_
SmVG_034850	31.5022	37.2535	30.5674	31.6287	12.3562	12.9811	10.2305	12.2572	-1.4532	5e-05	0.000181778	23.82	18.642	21.0641	16.0323	7.05319	8.68715	9.07476	8.69273	-0.579133	1.18028e-06	6.20403e-06	30.2574	26.9922	25.5139	21.1982	6.67192	8.62912	7.75318	7.86238	-1.15851	5.27718e-15	5.20554e-14	GO:0004871,GO:0005834,GO:0007186
Smp_132410	9.08645	7.4474	6.6427	5.57058	1.99351	2.08353	4.84996	1.59009	-1.45068	0.00025	0.000810166	9.26352	12.0061	9.15224	6.50963	2.10625	5.43969	1.696	1.90944	-0.980595	0.000318343	0.00106037	6.60873	8.5557	6.37643	4.3914	1.31598	3.26307	1.16048	1.21341	-1.29736	1.66335e-05	5.26818e-05	GO:0004930,GO:0007186,GO:0007218,GO:0016020,GO:0016021	neuropeptide receptor;Smp_132410	Putative neuropeptide F-like receptor [Source:UniProtKB/TrEMBL;Acc:G4VGK9]	gi|221316654|ref|NP_004876.2|	neuropeptide FF receptor 2 isoform 1 [Homo sapiens]
Smp_046800	20.04	28.432	19.2519	21.3834	7.80626	9.70526	8.29186	6.80871	-1.45014	5e-05	0.000181778	131.173	118.092	108.656	108.317	31.4471	38.1039	29.9469	37.4019	-0.945037	1.08644e-34	5.8969e-33	86.5363	74.0501	67.5566	66.7449	17.2208	23.0322	17.8971	22.0478	-1.34605	6.74937e-31	1.95571e-29	GO:0005215,GO:0006810,GO:0008289	fatty acid binding protein;Smp_046800.2	Putative fatty acid binding protein [Source:UniProtKB/TrEMBL;Acc:G4VCN0]	_	_
Smp_007780	6.49104	3.25254	3.44531	3.71633	1.04754	1.56613	1.82338	1.76106	-1.44757	5e-05	0.000181778	4.04422	8.03816	4.45093	4.4623	0.956053	2.18522	1.24101	1.76376	-0.966343	5.2881e-07	2.94818e-06	2.42948	4.63551	2.5826	2.4857	0.459401	1.19575	0.640769	0.91652	-1.38729	1.05344e-07	4.7069e-07		ubiquitin conjugating enzyme e2 o;Smp_007780	Putative uncharacterized protein [Source:UniProtKB/TrEMBL;Acc:G4VPX4]	_	_
Smp_130100	442.262	651.098	417.604	488.376	128.807	246.829	167.693	189.861	-1.44726	5e-05	0.000181778	877.352	637.229	643.921	665.027	131.266	209.337	236.737	238.708	-0.992828	2.36979e-11	2.36614e-10	542.515	377.827	375.896	384.134	65.4324	118.713	126.738	128.441	-1.38619	7.65653e-14	6.80767e-13	GO:0001664,GO:0005737,GO:0008047,GO:0043085	saposin containing protein;Smp_130100	Saposin containing protein [Source:UniProtKB/TrEMBL;Acc:G4VBU4]	_	_
Smp_194310	2.12087	1.78463	1.64312	1.61184	0.542625	0.410922	1.04777	0.627312	-1.44574	5e-05	0.000181778	3.04776	4.97003	3.1513	3.5289	0.849953	1.69066	0.341277	1.09573	-1.15039	0.000161712	0.000571395	1.90584	2.94174	1.86035	2.12225	0.423397	1.00072	0.219536	0.619454	-1.42058	6.85051e-07	2.69481e-06	GO:0050999	Dab2 interacting protein 2;Smp_194310	Dab2-interacting protein 2-like [Source:UniProtKB/TrEMBL;Acc:G4VN37]	_	_
Smp_152480	4.32523	4.48237	4.32034	3.54088	1.70847	1.51112	2.14306	0.75937	-1.44507	5e-05	0.000181778	8.28754	8.79431	8.26425	6.69189	2.26391	3.26893	2.14236	1.46204	-1.01607	2.26922e-08	1.55328e-07	5.32673	5.35019	4.97034	4.01882	1.15932	1.83994	1.20975	0.812411	-1.41543	7.44672e-12	5.48007e-11	GO:0005216,GO:0005249,GO:0005887,GO:0006810,GO:0006811,GO:0016020,GO:0016021,GO:0034220,GO:0042391,GO:0055085,GO:0071805	cyclic nucleotide gated cation channel;Smp_152480
Smp_171990	14.9534	11.7759	8.38597	10.9438	5.28932	3.06678	5.49502	3.09294	-1.4427	5e-05	0.000181778	14.632	19.6041	11.1496	12.5273	4.04859	6.09637	2.49186	3.68179	-1.0075	3.69035e-07	2.10796e-06	8.54395	11.1502	6.21495	6.76678	1.80497	3.23037	1.33011	1.7587	-1.38401	1.0907e-08	5.51928e-08		sterol regulatory element binding protein;Smp_171990	Sterol response element binding protein cleavage-activating protein, putative [Source:UniProtKB/TrEMBL;Acc:C4QLP0]	_	_
Smp_170550	125.001	113.865	99.6002	116.761	43.3581	34.7737	59.4441	30.1049	-1.44087	5e-05	0.000181778	218.268	243.112	213.602	221.506	60.1496	107.099	53.007	55.7616	-0.960882	3.05913e-11	3.01773e-10	133.779	142.966	124.482	128.076	30.0765	60.6316	28.7432	30.2153	-1.31992	1.78787e-14	1.6818e-13		granulin;Smp_170550.2	Putative granulin [Source:UniProtKB/TrEMBL;Acc:G4V750]	gi|4504151|ref|NP_002078.1|	granulins precursor [Homo sapiens]
Smp_168950	11.7362	8.43314	5.25045	7.17195	3.93899	2.2465	3.13253	2.6981	-1.43953	5e-05	0.000181778	10.9972	16.2227	7.60818	9.31424	3.29184	3.70246	2.108	3.30091	-0.986107	7.22377e-07	3.93127e-06	6.56697	9.16167	4.25866	5.13997	1.61945	2.0997	1.07471	1.77831	-1.36172	2.24734e-08	1.09074e-07	GO:0000287,GO:0004674,GO:0005524,GO:0005634,GO:0006468,GO:0018105,GO:0034048,GO:0035556	microtubule associated serine:threonine kinase;Smp_168950	Putative uncharacterized protein [Source:UniProtKB/TrEMBL;Acc:C1M042]	_	_
Smp_141680	105.514	96.2582	79.3602	101.78	34.6403	33.8566	43.6466	29.3089	-1.4367	5e-05	0.000181778	106.997	122.731	98.7637	112.557	26.396	43.3897	24.0254	26.968	-1.05522	9.47079e-19	1.91295e-17	66.5716	73.3613	58.2942	65.6235	13.2498	24.7308	13.0105	14.649	-1.47569	2.17714e-25	4.58803e-24	GO:0005578,GO:0005615,GO:0007155,GO:0030198,GO:0050839	fasciclin domain containing protein;Smp_141680	Putative uncharacterized protein [Source:UniProtKB/TrEMBL;Acc:G4V6F1]	_	_
Smp_175980	11.6982	11.8848	10.8104	12.6185	3.9576	4.75563	4.91865	3.75708	-1.43486	5e-05	0.000181778	12.4124	13.6338	12.5303	13.2397	2.76176	4.50361	3.40132	3.3006	-1.06385	2.79141e-36	1.65351e-34	7.54864	7.98214	7.21906	7.60601	1.38871	2.55071	1.85196	1.78589	-1.47094	1.39334e-31	4.18692e-30	GO:0006810,GO:0006812,GO:0015299,GO:0016020,GO:0016021,GO:0055085,GO:1902600	mitochondrial sodium:hydrogen exchanger NHA2;Smp_175980	Putative uncharacterized protein [Source:UniProtKB/TrEMBL;Acc:C1M0Q0]	gi|66793392|ref|NP_631912.2|	sodium/hydrogen exchanger-like domain-containing protein 1 isoform 1 [Homo sapiens]
Smp_180240	55.0971	50.7712	45.0179	49.4334	20.1047	16.2964	20.7694	16.9629	-1.43411	5e-05	0.000181778	71.1618	82.9319	69.1762	69.4061	18.7274	25.8328	16.0335	20.4005	-1.0347	2.12605e-37	1.37147e-35	42.842	47.9597	39.5694	39.3121	9.18363	14.3884	8.50156	10.9399	-1.45329	2.14684e-39	9.1674e-38	GO:0004867,GO:0010951,GO:0016020,GO:0016021	f spondin;note=pfam_scan%3BPfam:PF00014.18%3B%3BE()%3D1.5E-10%3Bscore%3D41.0%3Bqu ery 875-925%3Bdescription%3DKunitz_BPTI;note=pfam_scan%3BPfam:PF06468.8%3B%3BE()%3D2.9E-33%3Bscore%3D115.1%3Bqu ery 322-477%3Bdescription%3DSpond_N;Smp_180240	F-spondin, putative [Source:UniProtKB/TrEMBL;Acc:G4LZW3]	gi|110347423|ref|NP_006099.2|	spondin-1 precursor [Homo sapiens]
Smp_173030	20.3415	11.8673	12.8246	15.6636	6.01602	4.4235	7.8356	4.18893	-1.43401	5e-05	0.000181778	15.5123	26.3987	18.7718	20.2739	5.61752	9.36636	4.28453	5.23894	-0.954063	4.73144e-08	3.11078e-07	10.0119	16.2846	11.3118	12.236	2.91856	5.54759	2.41434	3.02128	-1.32614	2.50384e-10	1.54777e-09	GO:0004177,GO:0005737,GO:0005886,GO:0006508,GO:0008237,GO:0008270,GO:0042277,GO:0043171,GO:0070006	aminopeptidase A (M01 family);Smp_173030	Aminopeptidase A (M01 family) [Source:UniProtKB/TrEMBL;Acc:G4V857]	gi|61742777|ref|NP_005566.2|	leucyl-cystinyl aminopeptidase isoform 1 [Homo sapiens]
Smp_150340	17.352	16.6927	16.1175	16.5103	6.24089	5.98855	5.55675	6.89317	-1.43379	5e-05	0.000181778	16.9857	18.3937	17.8641	16.3157	4.1159	5.0224	3.91212	5.83081	-1.05427	4.33006e-41	3.23337e-39	10.1428	10.5684	10.1655	9.18282	2.04451	2.84459	2.12545	3.13793	-1.45416	6.84136e-46	3.78451e-44	GO:0005215,GO:0016020,GO:0016021,GO:0034220,GO:0055085	solute carrier family 16;Smp_150340	Monocarboxylate transporter, putative [Source:UniProtKB/TrEMBL;Acc:G4LYW9]	_	_
Smp_070240	82.6501	56.2578	17.8249	36.3472	20.6754	7.0105	28.6778	15.187	-1.43216	5e-05	0.000181778	144.246	198.671	59.5016	92.9719	38.1025	58.1013	14.4336	36.1696	-0.951362	0.0115214	0.0258335	90.5561	118.849	35.395	55.0924	19.5571	33.6668	8.21998	20.5624	-1.36393	0.000310945	0.000788785	GO:0016020,GO:0016021	venom allergen-like (VAL) 7 protein;Smp_070240
Smp_161600	3.01734	2.7073	2.61923	2.85646	1.02392	1.01526	1.14242	0.972549	-1.43092	5e-05	0.000181778	3.28396	3.76152	3.45434	3.47237	0.795212	1.25358	0.796333	1.00093	-1.04138	4.32756e-15	6.2582e-14	2.07876	2.2658	2.05794	2.03257	0.452855	0.766842	0.439216	0.625859	-1.33595	1.14367e-18	1.52741e-17		sox transcription factor;Smp_161600	Sox transcription factor [Source:UniProtKB/TrEMBL;Acc:G4LW02]	gi|23308713|ref|NP_008871.3|	transcription factor SOX-5 isoform a [Homo sapiens]
Smp_156190	1.46302	1.83706	1.74452	1.95076	0.51616	0.855502	0.781388	0.442001	-1.43064	5e-05	0.000181778	2.47121	2.29067	2.61924	2.18364	0.385098	0.915961	0.668073	0.599649	-1.08419	8.20154e-10	6.80479e-09	1.44556	1.30258	1.39123	1.33635	0.228908	0.541544	0.385131	0.273016	-1.39811	3.53605e-11	2.40748e-10		hypothetical protein;Smp_156190
SmVG_015845:Smp_062400	9.31732	8.49282	9.2477	10.9223	3.4211	4.13532	3.26718	3.27531	-1.42966	5e-05	0.000181778	8.96442	10.6675	11.0864	12.1081	2.32367	3.12963	2.94701	2.88055	-1.07289	1.07038e-36	6.49663e-35	5.71609	6.45141	6.58526	7.17766	1.17232	1.78437	1.65938	1.62066	-1.52663	1.77005e-28	4.48783e-27		hypothetical protein;note=predicted by EVM2;Smp_062400	Putative uncharacterized protein [Source:UniProtKB/TrEMBL;Acc:G4VJA8]	_	_
SmVG_015845:Smp_155810	9.31732	8.49282	9.2477	10.9223	3.4211	4.13532	3.26718	3.27531	-1.42966	5e-05	0.000181778	8.96442	10.6675	11.0864	12.1081	2.32367	3.12963	2.94701	2.88055	-1.07289	1.07038e-36	6.49663e-35	5.71609	6.45141	6.58526	7.17766	1.17232	1.78437	1.65938	1.62066	-1.52663	1.77005e-28	4.48783e-27		protocadherin 11;Smp_155810	Putative cadherin [Source:UniProtKB/TrEMBL;Acc:G4VJA7]	gi|14589944|ref|NP_116754.1|	protocadherin-11 Y-linked isoform b [Homo sapiens]
SmVG_015845:Smp_155820	9.31732	8.49282	9.2477	10.9223	3.4211	4.13532	3.26718	3.27531	-1.42966	5e-05	0.000181778	8.96442	10.6675	11.0864	12.1081	2.32367	3.12963	2.94701	2.88055	-1.07289	1.07038e-36	6.49663e-35	5.71609	6.45141	6.58526	7.17766	1.17232	1.78437	1.65938	1.62066	-1.52663	1.77005e-28	4.48783e-27		protocadherin 11;note=predicted by EVM2;Smp_155820	Putative uncharacterized protein [Source:UniProtKB/TrEMBL;Acc:G4VJA9]	_	_
SmVG_020290	727.601	688.99	571.98	571.938	254.981	262.816	309.182	124.826	-1.42769	5e-05	0.000181778	641.659	723.978	589.085	531.161	159.532	260.403	161.991	97.5571	-1.05725	1.38419e-06	7.20517e-06	414.329	439.658	352.523	312.105	82.6865	152.403	88.9385	53.6328	-1.42179	4.00297e-10	2.41169e-09
Smp_203440	944.775	1090.17	888.321	899.008	367.889	424.763	329.552	300.183	-1.42612	5e-05	0.000181778	683.534	595.722	593.95	512.794	166.676	187.027	205.858	191.731	-0.857638	4.61265e-17	7.90437e-16	494.708	406.978	407.832	349.513	97.8793	123.23	131.578	124.706	-1.21257	3.49773e-14	3.16486e-13		hypothetical protein;note=tmhmm%3B%3Bquery 1-71%3B;Smp_203440
Smp_125130	4.70403	4.8747	4.90005	5.8925	1.54966	1.89422	1.84553	2.30715	-1.42312	5e-05	0.000181778	5.59621	6.09829	6.4222	7.20202	1.27911	1.99268	1.70336	2.291	-0.998697	1.03641e-14	1.44127e-13	3.45525	3.60125	3.7525	4.10992	0.674997	1.15427	0.982522	1.26924	-1.34004	2.00644e-15	2.0628e-14	GO:0016020,GO:0016021	transmembrane protein 145;Smp_125130	Putative uncharacterized protein [Source:UniProtKB/TrEMBL;Acc:G4LZE5]	_	_
Smp_162290	7.42001	8.72797	8.43878	9.47634	2.59098	3.41121	2.84788	3.85406	-1.42291	5e-05	0.000181778	13.5038	12.9665	14.1134	14.7921	2.68973	4.38021	3.0207	4.70116	-1.07686	1.44878e-20	3.39362e-19	8.52113	8.01342	8.54322	8.80372	1.39449	2.47803	1.64619	2.57466	-1.53472	7.57194e-24	1.44282e-22		hypothetical protein;note=term%3Dstructural%3Bdate%3D20110831%3Bqualifier%3Dtranscript coordinates changed based on RNA-seq evidence - added 3'UTR%3BcuratorName%3Dap6@sanger.ac.uk;Smp_162290	Putative uncharacterized protein [Source:UniProtKB/TrEMBL;Acc:G4VLC2]	_	_
Smp_151580	5.01007	6.44039	5.72972	5.46703	2.6557	2.4418	1.39178	1.95814	-1.42275	5e-05	0.000181778	14.3033	11.9624	15.4598	14.0353	3.96675	3.35742	3.66832	3.97441	-1.03804	1.40014e-16	2.32495e-15	8.96272	7.17486	9.03626	8.15617	2.01336	2.08678	2.09434	2.30434	-1.39878	1.69148e-15	1.74452e-14	GO:0005515	pdz domain containing protein;Smp_151580	Putative pdz domain containing protein [Source:UniProtKB/TrEMBL;Acc:G4V5N6]	_	_
Smp_157950	6.76587	6.66253	4.6465	6.55579	2.97919	1.84617	2.61577	1.75227	-1.42179	5e-05	0.000181778	10.565	11.809	9.23527	9.94193	3.23863	3.42329	1.89266	2.61765	-1.07222	3.70265e-13	4.48577e-12	6.55302	7.05932	5.45664	5.82637	1.63776	1.96856	1.00691	1.44574	-1.48209	4.32268e-16	4.70756e-15	GO:0016020,GO:0016021,GO:0016757	glycogenin;Smp_157950	Glycogenin-related [Source:UniProtKB/TrEMBL;Acc:G4VDY9]	gi|20127457|ref|NP_004121.2|	glycogenin-1 isoform 1 [Homo sapiens]
Smp_161420	20.8808	17.2053	14.9767	17.7243	7.09408	5.70197	7.76416	5.89627	-1.41986	5e-05	0.000181778	30.0438	35.5935	28.7813	28.6856	8.33691	12.9654	8.26278	9.91099	-0.884912	3.75243e-28	1.42257e-26	18.8177	21.8872	17.0506	17.119	4.19697	7.42072	4.36802	5.30134	-1.26326	1.12582e-24	2.2883e-23		hypothetical protein;note=predicted by EVM2;Smp_161420	Putative uncharacterized protein [Source:UniProtKB/TrEMBL;Acc:G4VA44]	_	_
SmVG_000444:Smp_034580	6.16232	6.70233	6.34254	7.57951	2.36604	2.44283	3.05269	2.15214	-1.41954	5e-05	0.000181778	7.43135	7.66418	8.10995	8.62175	1.87669	2.88276	1.77294	2.05563	-1.06622	4.60583e-34	2.41483e-32	4.65589	4.58996	4.79803	5.0773	0.936996	1.66285	0.97635	1.13414	-1.49303	5.3957e-29	1.42365e-27		hypothetical protein;Smp_034580	Putative uncharacterized protein [Source:UniProtKB/TrEMBL;Acc:G4V939]	_	_
SmVG_000444:Smp_140850	6.16232	6.70233	6.34254	7.57951	2.36604	2.44283	3.05269	2.15214	-1.41954	5e-05	0.000181778	7.43135	7.66418	8.10995	8.62175	1.87669	2.88276	1.77294	2.05563	-1.06622	4.60583e-34	2.41483e-32	4.65589	4.58996	4.79803	5.0773	0.936996	1.66285	0.97635	1.13414	-1.49303	5.3957e-29	1.42365e-27		innexin unc 9;Smp_140850	Putative innexin [Source:UniProtKB/TrEMBL;Acc:G4V938]	_	_
SmVG_000444:Smp_140860	6.16232	6.70233	6.34254	7.57951	2.36604	2.44283	3.05269	2.15214	-1.41954	5e-05	0.000181778	7.43135	7.66418	8.10995	8.62175	1.87669	2.88276	1.77294	2.05563	-1.06622	4.60583e-34	2.41483e-32	4.65589	4.58996	4.79803	5.0773	0.936996	1.66285	0.97635	1.13414	-1.49303	5.3957e-29	1.42365e-27		innexin unc 9;Smp_140860	Putative innexin [Source:UniProtKB/TrEMBL;Acc:G4V940]	_	_
SmVG_000444:Smp_200750	6.16232	6.70233	6.34254	7.57951	2.36604	2.44283	3.05269	2.15214	-1.41954	5e-05	0.000181778	7.43135	7.66418	8.10995	8.62175	1.87669	2.88276	1.77294	2.05563	-1.06622	4.60583e-34	2.41483e-32	4.65589	4.58996	4.79803	5.0773	0.936996	1.66285	0.97635	1.13414	-1.49303	5.3957e-29	1.42365e-27		hypothetical protein;Smp_200750
SmVG_012336:Smp_145960	9.44346	8.19295	7.41154	8.51741	3.48711	2.63316	4.18435	2.2456	-1.41926	5e-05	0.000181778	8.17902	10.3885	8.17053	8.70125	2.2894	3.79529	1.77466	1.91127	-1.06851	9.30131e-11	8.7482e-10	5.01496	6.15876	4.77106	5.04554	1.13779	2.14691	0.958851	1.03233	-1.46408	8.96003e-14	7.93044e-13		hypothetical protein;Smp_145960	Putative uncharacterized protein [Source:UniProtKB/TrEMBL;Acc:G4VEJ1]	_	_
SmVG_012336:Smp_145970	9.44346	8.19295	7.41154	8.51741	3.48711	2.63316	4.18435	2.2456	-1.41926	5e-05	0.000181778	8.17902	10.3885	8.17053	8.70125	2.2894	3.79529	1.77466	1.91127	-1.06851	9.30131e-11	8.7482e-10	5.01496	6.15876	4.77106	5.04554	1.13779	2.14691	0.958851	1.03233	-1.46408	8.96003e-14	7.93044e-13		suppressor of hairless protein;Smp_145970	Putative recombining binding protein suppressor of hairless [Source:UniProtKB/TrEMBL;Acc:G4VEJ0]	gi|42560227|ref|NP_005340.2|	recombining binding protein suppressor of hairless isoform 1 [Homo sapiens]
Smp_148040	8.95427	6.35596	5.23382	7.02236	2.64369	1.63388	4.00527	2.02447	-1.41924	5e-05	0.000181778	6.24135	9.43915	5.69137	6.95987	1.91805	3.50898	1.07721	1.72659	-1.04101	1.54389e-05	6.70508e-05	3.90146	5.68528	3.37711	4.09492	0.968386	2.04043	0.59179	0.945349	-1.39139	3.02311e-07	1.26052e-06	GO:0016020,GO:0016021	DC STAMP domain containing protein 1;Smp_148040	Putative uncharacterized protein [Source:UniProtKB/TrEMBL;Acc:G4V8I8]	_	_
Smp_005720	53.4406	49.0839	50.4927	51.3968	18.1974	20.864	22.4033	15.1466	-1.41586	5e-05	0.000181778	48.466	59.415	55.038	50.0622	11.8416	19.3427	13.2899	11.7717	-1.09089	2.0152e-24	5.98295e-23	32.7045	37.6882	35.1997	31.7492	6.49135	12.0519	7.92063	7.31453	-1.48221	1.41065e-32	4.54772e-31	GO:0005215,GO:0005887,GO:0006810,GO:0006833,GO:0009992,GO:0015204,GO:0015250,GO:0015254,GO:0015793,GO:0016020,GO:0016021,GO:0034220,GO:0071918	Aquaporin 3 (AQP 3);Smp_005720	Putative aquaporin-3 [Source:UniProtKB/TrEMBL;Acc:G4V740]	gi|22538420|ref|NP_536354.2|	aquaporin-10 [Homo sapiens]
SmVG_024702:Smp_096390	10.5955	12.2112	10.5099	11.9105	3.31925	5.21211	4.53396	3.89474	-1.41505	5e-05	0.000181778	23.4218	21.6994	21.4138	20.9261	5.66065	7.58027	6.56392	7.18102	-0.917344	6.14601e-30	2.56695e-28	14.6582	13.1216	12.7912	12.2374	2.85643	4.40007	3.65394	4.02454	-1.29028	1.35211e-32	4.37347e-31		16 kda calcium binding protein;Smp_096390	Similar to 16 kDa calcium-binding protein [Source:UniProtKB/TrEMBL;Acc:G4VR58]	_	_
SmVG_024702:Smp_096410	10.5955	12.2112	10.5099	11.9105	3.31925	5.21211	4.53396	3.89474	-1.41505	5e-05	0.000181778	23.4218	21.6994	21.4138	20.9261	5.66065	7.58027	6.56392	7.18102	-0.917344	6.14601e-30	2.56695e-28	14.6582	13.1216	12.7912	12.2374	2.85643	4.40007	3.65394	4.02454	-1.29028	1.35211e-32	4.37347e-31		16 kda calcium binding protein;Smp_096410	Similar to 16 kDa calcium-binding protein [Source:UniProtKB/TrEMBL;Acc:G4VR56]	gi|4757902|ref|NP_004335.1|	centrin-2 [Homo sapiens]
SmVG_024702:Smp_096410.2	10.5955	12.2112	10.5099	11.9105	3.31925	5.21211	4.53396	3.89474	-1.41505	5e-05	0.000181778	23.4218	21.6994	21.4138	20.9261	5.66065	7.58027	6.56392	7.18102	-0.917344	6.14601e-30	2.56695e-28	14.6582	13.1216	12.7912	12.2374	2.85643	4.40007	3.65394	4.02454	-1.29028	1.35211e-32	4.37347e-31		16 kda calcium binding protein;Smp_096410.2
SmVG_030219:Smp_000520	27.2272	21.8091	20.4982	23.0515	8.74153	6.4652	11.7884	7.7623	-1.41347	5e-05	0.000181778	23.4034	31.1683	25.0226	25.0454	6.86026	12.0812	5.37349	7.90245	-0.959025	9.62121e-12	1.00545e-10	14.5952	18.6752	14.859	14.7254	3.57844	7.01607	3.03077	4.47132	-1.29467	1.62449e-15	1.68077e-14		hypothetical protein;Smp_000520	Putative uncharacterized protein [Source:UniProtKB/TrEMBL;Acc:G4LYI2]	_	_
SmVG_030219:Smp_000530	27.2272	21.8091	20.4982	23.0515	8.74153	6.4652	11.7884	7.7623	-1.41347	5e-05	0.000181778	23.4034	31.1683	25.0226	25.0454	6.86026	12.0812	5.37349	7.90245	-0.959025	9.62121e-12	1.00545e-10	14.5952	18.6752	14.859	14.7254	3.57844	7.01607	3.03077	4.47132	-1.29467	1.62449e-15	1.68077e-14		zinc finger transcription factor gli2;Smp_000530	Zinc finger transcription factor gli2 [Source:UniProtKB/TrEMBL;Acc:G4LYI1]	_	_
Smp_163650	5.10697	3.71148	3.98814	4.42617	1.3691	1.2717	2.49478	1.33617	-1.41293	5e-05	0.000181778	3.73981	5.50484	4.47773	4.42746	1.08071	2.41025	1.03649	1.31399	-0.923403	2.35122e-08	1.60495e-07	3.46215	4.84736	4.07261	4.15087	0.67053	1.90888	0.691432	0.98401	-1.47113	1.25543e-10	7.96275e-10		C terminal pdz ligand of neuronal nitric oxide;Smp_163650	C-terminal pdz ligand of neuronal nitric oxide synthase protein, putative [Source:UniProtKB/TrEMBL;Acc:G4LY20]	_	_
SmVG_002215:Smp_126050	6.36376	5.77817	4.99682	5.8912	2.1108	1.68875	2.74774	2.10881	-1.41172	5e-05	0.000181778	6.2552	7.18545	6.1128	6.32363	1.51936	2.69202	1.2045	1.94427	-1.0368	1.03631e-15	1.59605e-14	3.96761	4.41681	3.73264	3.72239	0.77118	1.5561	0.668819	1.10472	-1.42207	5.46556e-17	6.37277e-16		protocadherin fat 4;Smp_126050	Putative cadherin [Source:UniProtKB/TrEMBL;Acc:G4VB20]	gi|27754771|ref|NP_002578.2|	protocadherin-1 isoform 1 precursor [Homo sapiens]
SmVG_002215:Smp_126060	6.36376	5.77817	4.99682	5.8912	2.1108	1.68875	2.74774	2.10881	-1.41172	5e-05	0.000181778	6.2552	7.18545	6.1128	6.32363	1.51936	2.69202	1.2045	1.94427	-1.0368	1.03631e-15	1.59605e-14	3.96761	4.41681	3.73264	3.72239	0.77118	1.5561	0.668819	1.10472	-1.42207	5.46556e-17	6.37277e-16		hypothetical protein;Smp_126060	Putative uncharacterized protein [Source:UniProtKB/TrEMBL;Acc:G4VB19]	_	_
Smp_139850	2.67671	1.83199	1.42476	1.59974	0.776286	0.543364	0.775495	0.736641	-1.41155	5e-05	0.000181778	2.30894	3.11679	2.05884	2.13677	0.876689	1.02653	0.777093	0.947204	-0.699775	3.02337e-06	1.49063e-05	1.47279	1.98882	1.30797	1.32661	0.479686	0.66386	0.42948	0.600091	-0.933321	2.22092e-06	8.04421e-06		glucan 1%2C6 alpha glucosidase;Smp_139850	_	_	_
Smp_160210	2.63668	2.7294	2.14526	2.35236	0.687914	1.19171	1.04541	0.788345	-1.40939	5e-05	0.000181778	2.91396	2.81013	2.41395	2.12728	0.301242	0.973319	0.560331	0.976073	-1.11703	6.06027e-07	3.33789e-06	1.67208	1.62064	1.34556	1.21633	0.170298	0.52626	0.341192	0.456627	-1.43308	5.41961e-11	3.61407e-10	GO:0006679,GO:0008120,GO:0016020,GO:0016021,GO:0016740,GO:0016757	ceramide glucosyltransferase;Smp_160210	Putative ceramide glucosyltransferase [Source:UniProtKB/TrEMBL;Acc:G4VJB9]	gi|4507811|ref|NP_003349.1|	ceramide glucosyltransferase [Homo sapiens]
SmVG_023095:Smp_156970	11.4235	11.2224	10.3777	11.3269	4.72933	3.46164	5.4397	3.06738	-1.40927	5e-05	0.000181778	13.4044	15.5691	13.5364	13.541	3.71477	5.21424	2.4414	2.85932	-1.14741	5.69095e-13	6.74862e-12	8.64199	9.55954	8.23862	8.13954	1.91438	3.11407	1.41486	1.69598	-1.54003	2.64794e-18	3.42824e-17		cadherin;Smp_156970	Putative cadherin [Source:UniProtKB/TrEMBL;Acc:G4VNH6]	gi|11128031|ref|NP_061748.1|	protocadherin gamma-B5 isoform 1 precursor [Homo sapiens]
SmVG_023095:Smp_179750	11.4235	11.2224	10.3777	11.3269	4.72933	3.46164	5.4397	3.06738	-1.40927	5e-05	0.000181778	13.4044	15.5691	13.5364	13.541	3.71477	5.21424	2.4414	2.85932	-1.14741	5.69095e-13	6.74862e-12	8.64199	9.55954	8.23862	8.13954	1.91438	3.11407	1.41486	1.69598	-1.54003	2.64794e-18	3.42824e-17		protocadherin 1;Smp_179750	Cadherin-related [Source:UniProtKB/TrEMBL;Acc:G4VNH7]	gi|14589944|ref|NP_116754.1|	protocadherin-11 Y-linked isoform b [Homo sapiens]
Smp_171140	70.1659	54.0494	49.1329	54.8098	22.599	14.2317	35.2967	13.8167	-1.40856	5e-05	0.000181778	74.6625	104.02	79.5541	77.0047	24.317	46.4016	17.031	20.0619	-0.94099	5.71668e-06	2.6898e-05	47.4624	63.2212	48.0708	46.0689	12.7432	27.2956	9.78027	11.3557	-1.25383	4.3656e-08	2.04836e-07	GO:0016020,GO:0016021	serine rich repeat protein;note=predicted by EVM2;note=tmhmm%3B%3Bquery 1-789%3B;note=%3Bquery 765-789%3B;note=%3Bquery 742-764%3B;note=%3Bquery 1-741%3B;Smp_171140	Putative serine-rich repeat protein [Source:UniProtKB/TrEMBL;Acc:G4VCV5]	_	_
Smp_165440	17.0161	15.6026	18.5405	17.6678	5.32279	8.4167	6.10164	6.12778	-1.40619	5e-05	0.000181778	22.2954	26.4356	28.458	24.9194	5.18045	8.20915	7.5188	7.4817	-1.02977	7.76123e-43	6.12988e-41	13.4982	15.3272	16.4165	14.1589	2.5073	4.54052	3.93982	3.95149	-1.45288	9.0608e-37	3.4868e-35	GO:0005515,GO:0007165	netrin receptor unc 5;Smp_165440	Putative netrin receptor unc5 [Source:UniProtKB/TrEMBL;Acc:G4VTP5]	gi|32261318|ref|NP_734465.2|	netrin receptor UNC5B precursor [Homo sapiens]
Smp_159650	7.11264	6.31459	6.21607	6.08763	2.22516	2.9146	1.99281	2.58812	-1.40437	5e-05	0.000181778	13.7205	11.198	10.79	9.98906	1.90243	3.12332	2.84791	3.19543	-1.16754	1.22964e-27	4.44294e-26	12.606	9.42469	9.2222	8.59275	1.35089	2.42101	2.15161	2.25125	-1.76335	2.53599e-29	6.78309e-28	GO:0016020,GO:0016021	N methyl D aspartate receptor associated;note=tmhmm%3B%3Bquery 1-169%3B;Smp_159650	Putative uncharacterized protein [Source:UniProtKB/TrEMBL;Acc:G4LZR4]	_	_
Smp_194650	16.925	11.1635	11.4585	12.5692	4.47852	3.51451	7.77869	3.93585	-1.40298	5e-05	0.000181778	12.294	20.5224	13.9489	13.9141	3.40272	7.70811	2.602	3.72028	-1.05594	1.40157e-06	7.28027e-06	7.46319	12.0168	8.13243	7.94115	1.64417	4.31179	1.40387	1.99894	-1.42676	3.52448e-09	1.89687e-08	GO:0005515	hypothetical protein;Smp_194650	Putative uncharacterized protein [Source:UniProtKB/TrEMBL;Acc:G4VGE6]	_	_
SmVG_002885	16.6293	21.1028	14.4341	24.4952	5.31687	11.7868	6.62117	5.26513	-1.40294	5e-05	0.000181778	38.1751	40.5762	38.435	46.3398	8.50537	14.8256	16.5624	10.7328	-0.909006	6.19711e-08	3.99344e-07	41.1479	40.2368	39.1979	49.4204	7.82859	13.2658	18.1121	12.3079	-1.18465	1.18489e-07	5.26281e-07	GO:0005875,GO:0007017
Smp_157540	25.9562	24.178	23.4212	25.6689	10.3173	7.84617	10.3315	9.04698	-1.40219	5e-05	0.000181778	29.9332	35.3021	28.7858	31.785	9.25674	11.7264	6.67599	9.8621	-0.96565	6.96723e-20	1.54394e-18	18.2441	20.5411	17.868	18.1276	4.52272	6.53514	3.53856	5.33588	-1.36312	4.3324e-30	1.2086e-28	GO:0005515,GO:0005622,GO:0006355	SmadA protein;Smp_157540	Putative smad [Source:UniProtKB/TrEMBL;Acc:G4VAI1]	gi|51173730|ref|NP_001003652.1|	mothers against decapentaplegic homolog 2 isoform 1 [Homo sapiens]
SmVG_030124:Smp_078060	14.0287	13.6854	12.2644	13.6534	4.88676	4.10467	5.67186	5.65695	-1.40017	5e-05	0.000181778	14.7804	16.7326	14.8163	14.722	3.68121	5.55753	3.13185	4.9528	-1.02203	1.92557e-33	9.76334e-32	9.21069	9.99477	8.79827	8.80151	1.87097	3.18572	1.74825	2.72994	-1.43036	3.57084e-32	1.13613e-30		hypothetical protein;Smp_078060	Putative uncharacterized protein [Source:UniProtKB/TrEMBL;Acc:C1LZT3]	_	_
SmVG_030124:Smp_078070	14.0287	13.6854	12.2644	13.6534	4.88676	4.10467	5.67186	5.65695	-1.40017	5e-05	0.000181778	14.7804	16.7326	14.8163	14.722	3.68121	5.55753	3.13185	4.9528	-1.02203	1.92557e-33	9.76334e-32	9.21069	9.99477	8.79827	8.80151	1.87097	3.18572	1.74825	2.72994	-1.43036	3.57084e-32	1.13613e-30		hypothetical protein;Smp_078070	Putative uncharacterized protein [Source:UniProtKB/TrEMBL;Acc:C1LZT4]	_	_
SmVG_030124:Smp_164260	14.0287	13.6854	12.2644	13.6534	4.88676	4.10467	5.67186	5.65695	-1.40017	5e-05	0.000181778	14.7804	16.7326	14.8163	14.722	3.68121	5.55753	3.13185	4.9528	-1.02203	1.92557e-33	9.76334e-32	9.21069	9.99477	8.79827	8.80151	1.87097	3.18572	1.74825	2.72994	-1.43036	3.57084e-32	1.13613e-30		hypothetical protein;Smp_164260	Putative uncharacterized protein [Source:UniProtKB/TrEMBL;Acc:C1LZT2]	_	_
Smp_166960	16.794	15.2168	13.987	16.6741	5.52143	5.63846	7.22458	5.36633	-1.39984	5e-05	0.000181778	17.9221	20.2796	18.0175	19.1119	4.71402	7.9576	5.17528	6.06417	-0.907467	3.24024e-32	1.55342e-30	10.8725	11.9338	10.5088	10.9843	2.29647	4.43935	2.79322	3.2607	-1.26981	3.81366e-33	1.25864e-31	GO:0016874	ubiquitin protein ligase BRE1;Smp_166960	Putative ubiquitin-protein ligase BRE1 [Source:UniProtKB/TrEMBL;Acc:G4VC94]	_	_
Smp_138200	6.95701	5.29958	5.96827	5.16283	1.85996	2.29487	2.29986	2.40911	-1.39975	5e-05	0.000181778	5.55541	8.0245	6.95451	5.62885	1.30792	2.09032	1.59214	2.28907	-1.02906	7.10083e-24	2.04414e-22	3.3954	4.7192	4.0338	3.26692	0.660084	1.17714	0.862272	1.22242	-1.44936	1.06304e-19	1.52652e-18	GO:0005488	thyroid adenoma associated protein;Smp_138200	Putative uncharacterized protein [Source:UniProtKB/TrEMBL;Acc:G4LW86]	_	_
SmVG_020579:Smp_149460	12.6366	11.6495	13.045	12.0832	5.13567	3.70134	4.96304	4.93292	-1.39935	5e-05	0.000181778	12.044	14.5122	15.0832	12.5588	3.52405	4.61335	2.4888	4.35199	-1.04873	1.12258e-24	3.3735e-23	7.70537	8.8042	9.28864	7.6503	1.93121	2.75896	1.41178	2.53483	-1.438	8.50747e-26	1.84064e-24		Tyrosine Kinase%2C TK group%2C SYK family;Smp_149460	Tyrosine kinase [Source:UniProtKB/TrEMBL;Acc:G4VKS4]	gi|21361553|ref|NP_003168.2|	tyrosine-protein kinase SYK isoform 1 [Homo sapiens]
SmVG_020579:Smp_149470	12.6366	11.6495	13.045	12.0832	5.13567	3.70134	4.96304	4.93292	-1.39935	5e-05	0.000181778	12.044	14.5122	15.0832	12.5588	3.52405	4.61335	2.4888	4.35199	-1.04873	1.12258e-24	3.3735e-23	7.70537	8.8042	9.28864	7.6503	1.93121	2.75896	1.41178	2.53483	-1.438	8.50747e-26	1.84064e-24		tyrosine protein kinase SYK;note=pfam_scan%3BPfam:PF00017.19%3B%3BE()%3D2.1E-15%3Bscore%3D56.1%3Bqu ery 49-124%3Bdescription%3DSH2;note=pfam_scan%3BPfam:PF00017.19%3B%3BE()%3D9.6E-17%3Bscore%3D60.4%3Bqu ery 202-277%3Bdescription%3DSH2;note=iprscan%3BInterPro:IPR000980 : SH2 motif%3BPfam:PF00017%3B%3Bscore%3D1.4E-18%3Bquery 202-277%3Bdescription%3DSH2 motif;note=iprscan%3BInterPro:IPR000980 : SH2 …	Putative tyrosine-protein kinase zap-70 [Source:UniProtKB/TrEMBL;Acc:G4VKS5]	gi|31455611|ref|NP_001070.2|	tyrosine-protein kinase ZAP-70 isoform 1 [Homo sapiens]
Smp_173760	2.75679	2.33581	2.05301	2.38168	0.996957	0.767019	0.822369	1.02972	-1.39765	5e-05	0.000181778	1.95484	2.66429	1.88415	1.85155	0.4848	0.569071	0.275032	0.533704	-1.25815	4.51288e-15	6.51091e-14	1.47384	1.78169	1.37678	1.38238	0.343401	0.438739	0.2626	0.454357	-1.46698	5.09705e-17	5.96453e-16	GO:0005622,GO:0005634,GO:0008270,GO:0046872	hypothetical protein;Smp_173760	Putative uncharacterized protein [Source:UniProtKB/TrEMBL;Acc:G4VR05]	_	_
Smp_088920	1.98669	1.93347	1.43181	1.99222	0.684255	0.612449	0.779047	0.711748	-1.39763	5e-05	0.000181778	2.29984	2.53922	1.87371	2.35796	0.66349	0.844022	0.509276	0.774613	-0.924006	7.30643e-10	6.11982e-09	1.43628	1.49405	1.09011	1.36013	0.321222	0.478929	0.266895	0.404788	-1.30945	3.25507e-12	2.46625e-11	GO:0000166,GO:0004672,GO:0004674,GO:0005515,GO:0005524,GO:0006468,GO:0016301,GO:0016310,GO:0016740,GO:0016772	serine:threonine protein kinase;Smp_088920	Serine/threonine kinase [Source:UniProtKB/TrEMBL;Acc:G4VAR4]	_	_
Smp_175360	6.90023	4.67817	4.69061	5.84298	1.85541	1.68617	2.66896	2.18701	-1.39679	5e-05	0.000181778	5.66119	8.7453	5.74898	6.79179	1.47218	2.31475	1.47163	2.11771	-1.03517	1.10993e-16	1.86061e-15	4.18395	6.60655	4.28592	4.98014	0.894565	1.71551	0.841371	1.43038	-1.52365	3.17727e-14	2.89643e-13	GO:0000166,GO:0005524,GO:0005887,GO:0006812,GO:0006874,GO:0016020,GO:0016021,GO:0016787,GO:0019829,GO:0043231,GO:0046872,GO:0098655	cation transporting atpase worm;Smp_175360
SmVG_029474	34.7274	22.2619	19.5499	23.4784	10.7611	7.09436	10.5524	9.58134	-1.39659	5e-05	0.000181778	27.0616	43.8011	25.7012	28.1999	9.03806	11.7489	5.89794	9.65376	-0.975571	7.1292e-09	5.24411e-08	15.6142	24.15	13.9867	15.263	4.08372	6.1578	2.92062	4.88553	-1.38508	5.67851e-13	4.63032e-12	GO:0003824,GO:0008152,GO:0005634,GO:0008134
SmVG_022378:Smp_126470	94.3537	93.5614	92.6471	106.621	37.0891	34.062	38.1523	37.899	-1.39522	5e-05	0.000181778	145.343	167.526	153.228	164.451	38.1289	53.7036	32.7406	46.0088	-1.05943	1.31383e-45	1.13201e-43	90.7304	100.066	90.8277	96.9136	19.6598	30.9537	18.4881	25.9079	-1.49137	1.98465e-43	1.01698e-41		hypothetical protein;Smp_126470	Putative uncharacterized protein [Source:UniProtKB/TrEMBL;Acc:G4VN44]	_	_
SmVG_022378:Smp_126480	94.3537	93.5614	92.6471	106.621	37.0891	34.062	38.1523	37.899	-1.39522	5e-05	0.000181778	145.343	167.526	153.228	164.451	38.1289	53.7036	32.7406	46.0088	-1.05943	1.31383e-45	1.13201e-43	90.7304	100.066	90.8277	96.9136	19.6598	30.9537	18.4881	25.9079	-1.49137	1.98465e-43	1.01698e-41		calponin;Smp_126480	Putative calponin/transgelin [Source:UniProtKB/TrEMBL;Acc:G4VN43]	gi|21361120|ref|NP_001290.2|	calponin-1 [Homo sapiens]
Smp_127460	9.28302	9.24929	8.83305	10.1231	2.80751	3.95112	3.29771	4.21258	-1.39357	5e-05	0.000181778	16.1636	17.6263	18.6751	17.4471	4.15426	5.49292	4.74076	7.05634	-0.934554	2.44849e-23	6.7793e-22	10.7068	11.3768	11.7151	11.2178	2.16673	3.41501	2.72387	4.18819	-1.31908	6.88085e-22	1.13739e-20		hypothetical protein;Smp_127460	Putative myosin heavy chain [Source:UniProtKB/TrEMBL;Acc:G4VEV4]	gi|110227629|ref|NP_060900.2|	translin-associated factor X-interacting protein 1 [Homo sapiens]
Smp_079010	109.128	103.204	92.1804	99.9313	39.8114	38.7439	44.8787	30.7278	-1.39149	5e-05	0.000181778	101.123	114.474	99.6842	97.1971	26.0518	38.4914	24.6914	25.6673	-1.03057	1.28252e-28	4.96914e-27	63.3143	68.5107	59.0323	57.1646	13.3785	22.1647	13.6976	14.2187	-1.44303	3.41504e-33	1.13477e-31	GO:0000166,GO:0001932,GO:0005952,GO:0007165,GO:0008603,GO:0016301,GO:0016310,GO:0030552,GO:0045859	cAMP dependent protein kinase type II regulatory;Smp_079010	Camp-dependent protein kinase type II-alpha regulatory subunit, putative [Source:UniProtKB/TrEMBL;Acc:G4LV34]	gi|47132585|ref|NP_002727.2|	cAMP-dependent protein kinase type II-beta regulatory subunit [Homo sapiens]
Smp_180810	44.3444	38.7636	37.2079	45.7682	16.3331	15.3675	18.4355	13.2536	-1.38959	5e-05	0.000181778	41.9049	50.956	43.928	48.6024	12.2384	17.7172	11.1748	12.4955	-0.99336	9.81199e-26	3.12386e-24	25.3306	29.5545	25.2193	27.6526	5.95037	9.83842	5.92771	6.61054	-1.39456	2.40714e-31	7.14511e-30	GO:0004867,GO:0005576,GO:0006030,GO:0006508,GO:0008061,GO:0008233,GO:0010951	Papilin;Smp_180810	Putative kunitz-type protease inhibitor [Source:UniProtKB/TrEMBL;Acc:G4V6G8]	_	_
Smp_175510	10.9862	10.1277	10.5083	12.4343	4.25862	3.76506	4.89885	3.90299	-1.3887	5e-05	0.000181778	11.7885	13.331	13.5443	13.9103	3.40292	5.01669	2.89441	3.98413	-0.993024	1.12205e-32	5.46435e-31	7.41867	7.99696	8.23566	8.22689	1.75271	2.91957	1.60445	2.22515	-1.38084	4.23209e-32	1.33778e-30	GO:0005515,GO:0016020,GO:0016021	hypothetical protein;Smp_175510	Putative uncharacterized protein [Source:UniProtKB/TrEMBL;Acc:G4VGR6]	_	_
Smp_146620	2.41864	2.4171	2.11346	1.99125	0.889044	0.922352	0.794991	0.816071	-1.38531	5e-05	0.000181778	2.37593	2.56769	2.2752	1.94566	0.602736	0.66788	0.58077	0.666037	-1.0196	6.69207e-10	5.62052e-09	1.48525	1.55	1.34848	1.1482	0.317594	0.383196	0.32182	0.368083	-1.468	2.67633e-15	2.72561e-14	GO:0000155,GO:0000160,GO:0005216,GO:0005249,GO:0005622,GO:0005887,GO:0006355,GO:0006810,GO:0006811,GO:0006813,GO:0007165,GO:0016020,GO:0016021,GO:0023014,GO:0034220,GO:0042391,GO:0055085,GO:0071805,GO:0004871,GO:0008076	potassium voltage gated channel protein;Smp_146620	Putative voltage-gated potassium channel [Source:UniProtKB/TrEMBL;Acc:G4VBR0]	gi|27437001|ref|NP_758872.1|	potassium voltage-gated channel subfamily H member 1 isoform 1 [Homo sapiens]
Smp_161250	41.8754	40.8769	42.6855	43.5956	16.3693	14.7568	17.7633	16.0151	-1.38092	5e-05	0.000181778	45.1599	52.142	51.8582	48.8288	11.9974	16.7339	10.0774	14.0621	-1.07634	9.88977e-55	1.17165e-52	27.5425	30.6292	30.0293	28.0792	5.9475	9.42678	5.43114	7.57094	-1.51232	6.56579e-48	4.02041e-46	GO:0006355,GO:0046983	microphthalmia associated transcription factor;Smp_161250	Putative uncharacterized protein [Source:UniProtKB/TrEMBL;Acc:G4M0B5]	gi|4557755|ref|NP_000239.1|	microphthalmia-associated transcription factor isoform 4 [Homo sapiens]
SmVG_022958:Smp_041210	4.42263	3.49009	4.00693	4.13284	1.18617	1.65942	2.01256	1.3124	-1.37933	5e-05	0.000181778	5.22747	6.14819	6.71349	5.91048	1.29881	2.65515	1.806	2.15173	-0.875892	1.24859e-15	1.90866e-14	3.28905	3.70501	4.13914	3.55802	0.693632	1.56925	1.01243	1.24212	-1.18139	2.80312e-14	2.56737e-13		hypothetical protein;note=predicted by EVM2;Smp_041210
SmVG_022958:Smp_144620	4.42263	3.49009	4.00693	4.13284	1.18617	1.65942	2.01256	1.3124	-1.37933	5e-05	0.000181778	5.22747	6.14819	6.71349	5.91048	1.29881	2.65515	1.806	2.15173	-0.875892	1.24859e-15	1.90866e-14	3.28905	3.70501	4.13914	3.55802	0.693632	1.56925	1.01243	1.24212	-1.18139	2.80312e-14	2.56737e-13		regulator of G protein signaling 3;Smp_144620	Regulator of G protein signaling 3, rgs3,putative [Source:UniProtKB/TrEMBL;Acc:G4LWU1]	_	_
Smp_130580	106.24	104.971	89.1266	108.036	39.27	38.5761	48.9619	30.2229	-1.37884	5e-05	0.000181778	139.547	152.929	135.451	147.444	37.8014	62.6748	43.6197	39.1005	-0.895529	6.20406e-17	1.05873e-15	85.9408	90.7078	79.1784	85.4242	18.678	35.7213	23.4648	21.0757	-1.23691	2.56261e-21	4.09681e-20	GO:0005515,GO:0032502	disabled 2;Smp_130580	Putative uncharacterized protein [Source:UniProtKB/TrEMBL;Acc:G4VRS1]	_	_
SmVG_001772	4.0101	3.41558	2.10225	2.61333	1.19778	0.973354	1.78043	0.717476	-1.37872	5e-05	0.000181778	3.72482	4.00597	2.24046	2.45037	0.660441	1.39843	0.425242	0.453192	-1.24721	1.9005e-05	8.08006e-05	2.52868	2.69223	1.44027	1.52827	0.371442	0.908977	0.333782	0.314411	-1.54918	1.8529e-06	6.81777e-06
Smp_065210	19.2414	25.3214	21.4423	25.257	8.03499	10.7472	6.88807	9.43822	-1.37819	5e-05	0.000181778	71.7712	64.4019	69.2196	72.5484	15.3746	18.0107	18.1964	21.9744	-1.07021	6.58987e-49	6.4955e-47	44.5027	38.2705	40.7836	42.2819	7.7222	10.269	9.94354	12.0451	-1.51222	2.77059e-39	1.1728e-37		hypothetical protein;Smp_065210.2	Putative uncharacterized protein [Source:UniProtKB/TrEMBL;Acc:G4VCS4]	_	_
Smp_144030	61.8697	55.6061	47.5307	54.9268	22.3147	18.15	26.6414	17.585	-1.37678	5e-05	0.000181778	69.0378	77.8444	66.9936	67.0696	20.2347	31.9655	18.7581	22.9198	-0.852108	1.31924e-22	3.49555e-21	44.652	48.3724	40.8337	40.5915	10.6858	19.1291	11.149	13.1496	-1.18576	1.7437e-25	3.69861e-24	GO:0004605,GO:0005789,GO:0006655,GO:0016020,GO:0016021,GO:0016024,GO:0016740,GO:0016772,GO:0016779	phosphatidate cytidylyltransferase;Smp_144030	Phosphatidate cytidylyltransferase [Source:UniProtKB/TrEMBL;Acc:G4VKI9]	gi|20143480|ref|NP_003809.1|	phosphatidate cytidylyltransferase 2 [Homo sapiens]
Smp_156230	339.904	443.08	344.632	397.685	152.135	170.627	127.389	137.47	-1.37614	5e-05	0.000181778	513.611	421.071	441.14	458.309	117.073	124.729	130.196	126.679	-0.996642	8.70479e-23	2.33664e-21	341.999	270.052	280.937	266.671	63.1294	76.0568	78.8363	75.4355	-1.40743	4.69789e-24	9.14774e-23		hypothetical protein;Smp_156230	Putative uncharacterized protein [Source:UniProtKB/TrEMBL;Acc:G4VMG8]	_	_
Smp_081720	2.09555	1.80913	2.12885	2.1375	0.677243	0.846519	0.751225	0.875328	-1.37502	5e-05	0.000181778	2.21	2.69128	2.81465	2.38152	0.793478	1.01607	0.801838	1.00148	-0.770036	1.27646e-13	1.60811e-12	1.41292	1.62788	1.64214	1.46276	0.333013	0.510757	0.396674	0.521263	-1.22798	2.68149e-20	4.01028e-19	GO:0016020,GO:0016021	transmembrane protein 231;Smp_081720	Putative uncharacterized protein [Source:UniProtKB/TrEMBL;Acc:G4LY85]	gi|116734683|ref|NP_001070884.1|	transmembrane protein 231 isoform 1 [Homo sapiens]
SmVG_030000	1.91007	1.80435	2.50353	2.13635	0.518548	0.399918	0.462187	1.84185	-1.37434	5e-05	0.000181778	2.04677	2.41947	3.10542	2.32712	0.645487	0.657628	0.566425	1.95229	-0.817636	0.00168756	0.00474064	1.38095	1.54468	1.82428	1.35284	0.337167	0.417739	0.337083	1.08833	-0.958181	0.00140327	0.00313067
Smp_071610	120.224	155.23	124.843	142.237	51.4013	58.3815	51.0805	48.636	-1.37277	5e-05	0.000181778	234.706	196.352	210.824	225.78	55.6824	73.0905	63.3285	67.8049	-0.941845	5.95144e-43	4.73082e-41	138.197	112.056	118.119	124.443	26.1907	39.6274	31.9692	34.4056	-1.33195	3.38047e-34	1.17965e-32	GO:0004185,GO:0006508,GO:0008236,GO:0008239,GO:0016787	Lysosomal Pro X carboxypeptidase;Smp_071610	Family S28 unassigned peptidase (S28 family) [Source:UniProtKB/TrEMBL;Acc:G4VRT6]	gi|62420888|ref|NP_037511.2|	dipeptidyl peptidase 2 preproprotein [Homo sapiens]
Smp_171440	3.51451	2.15523	2.72552	2.347	1.34419	0.616651	1.12237	1.06689	-1.37208	5e-05	0.000181778	3.93606	6.5697	5.40346	4.3767	1.5466	1.99135	1.03228	1.50615	-0.940687	3.4202e-10	2.97601e-09	2.32992	3.85665	3.02249	2.4624	0.752417	1.10636	0.509153	0.768729	-1.31858	2.24427e-09	1.23378e-08	GO:0004842,GO:0005515,GO:0005737,GO:0006897,GO:0007219,GO:0008270,GO:0016567,GO:0046872	mind bomb;Smp_171440	Putative mind bomb [Source:UniProtKB/TrEMBL;Acc:G4VQV8]	gi|282394030|ref|NP_543151.2|	E3 ubiquitin-protein ligase MIB2 isoform 1 [Homo sapiens]
Smp_145090	12.4264	12.8048	10.8155	11.8768	4.33087	4.84438	4.43169	4.92265	-1.3709	5e-05	0.000181778	17.2067	18.3171	15.5334	15.6132	3.50173	5.05352	4.2423	5.06987	-1.06273	7.60472e-37	4.68489e-35	10.4196	10.6177	8.97361	8.91964	1.71636	2.82376	2.28811	2.70915	-1.50284	3.96174e-37	1.5553e-35	GO:0015194,GO:0015825,GO:0016020,GO:0016021	serine incorporator 5;Smp_145090	Tumor differentially expressed protein-related [Source:UniProtKB/TrEMBL;Acc:G4M0S3]	gi|312261213|ref|NP_061035.2|	serine incorporator 2 isoform 2 [Homo sapiens]
Smp_147050	53.4371	53.8001	47.7041	52.3498	17.267	20.9758	23.5276	18.3948	-1.37061	5e-05	0.000181778	80.598	84.4462	79.4992	80.6037	17.9791	29.1009	20.8063	24.4902	-1.01334	1.08457e-56	1.36358e-54	50.9409	51.1194	47.8698	48.1438	9.44427	16.5791	11.5873	13.6694	-1.41434	4.59512e-53	3.38925e-51	GO:0005524,GO:0006810,GO:0006811,GO:0015991,GO:0015992,GO:0016820,GO:0033178,GO:0033180,GO:0046034,GO:0046961	v type proton atpase catalytic subunit a;Smp_147050	Putative atp synthase alpha subunit vacuolar [Source:UniProtKB/TrEMBL;Acc:G4VKT8]	gi|19913424|ref|NP_001681.2|	V-type proton ATPase catalytic subunit A [Homo sapiens]
Smp_149240	8.03558	6.05433	6.69249	6.55944	2.81005	2.27081	3.43946	2.06016	-1.3697	5e-05	0.000181778	7.54168	10.7201	9.51121	8.31441	2.43289	4.011	2.37649	2.87146	-0.880796	2.43265e-19	5.14111e-18	4.44179	6.16032	5.42917	4.70363	1.16317	2.17666	1.04728	1.40823	-1.3235	6.35052e-17	7.36933e-16	GO:0005634	chromobox protein 2;Smp_149240	Putative chromobox protein [Source:UniProtKB/TrEMBL;Acc:G4VMB0]	_	_
Smp_128590	3.88589	2.71733	3.76236	2.6903	0.777264	0.609631	2.09827	1.57267	-1.36811	0.0006	0.00179906	6.28304	13.9383	8.50506	8.10296	1.42529	3.84022	0.817174	2.64789	-1.25476	5.82907e-05	0.000225211	4.38129	8.95137	5.61192	5.29815	0.752845	2.55036	0.478071	1.50276	-1.65841	1.19115e-06	4.53365e-06	GO:0005515	laminin gamma 3 chain;Smp_128590
Smp_147830	2.47343	2.16971	1.83728	2.35816	0.521557	1.32448	0.775691	0.805564	-1.36675	5e-05	0.000181778	2.25888	2.88194	2.2361	2.48225	0.319904	0.707706	0.805618	0.769921	-1.11702	7.91035e-09	5.79794e-08	1.46404	1.75411	1.361	1.50117	0.177694	0.455747	0.515973	0.477775	-1.3876	1.3085e-09	7.41102e-09	GO:0005509,GO:0005886,GO:0007155,GO:0007156,GO:0016020,GO:0016021	cadherin;Smp_147830	Cadherin-related [Source:UniProtKB/TrEMBL;Acc:G4VDN1]	gi|9256590|ref|NP_061731.1|	protocadherin alpha-5 isoform 1 precursor [Homo sapiens]
Smp_136180	6.59298	6.88189	5.61427	6.54433	2.54296	1.90165	3.18161	2.31395	-1.36669	5e-05	0.000181778	9.12122	10.2877	8.29369	8.55967	2.39931	3.79841	1.75974	2.60645	-1.00693	3.09523e-14	4.11395e-13	5.45712	5.89607	4.69112	4.82694	1.12395	2.12451	0.829828	1.29671	-1.44069	2.0468e-15	2.09985e-14	GO:0003684,GO:0003887,GO:0006281	dna polymerase eta;Smp_136180	Putative DNA polymerase eta [Source:UniProtKB/TrEMBL;Acc:G4VAP7]	_	_
Smp_170870	17.1924	16.6787	13.1832	14.8883	6.45527	5.88675	6.75377	4.93663	-1.36595	5e-05	0.000181778	19.8108	21.9885	17.6932	17.9952	4.90488	7.1376	4.6699	5.08081	-1.02082	4.9951e-28	1.86499e-26	12.3605	13.1569	10.4712	10.587	2.49043	4.10438	2.55019	2.79653	-1.43516	1.14865e-33	3.93777e-32	GO:0004721,GO:0004725,GO:0005515,GO:0006470,GO:0016020,GO:0016021,GO:0016311,GO:0016787,GO:0016791,GO:0035335	PDZ domain containing protein GIPC3;Smp_170870	Putative rgs-gaip interacting protein gipc [Source:UniProtKB/TrEMBL;Acc:G4VLE4]	_	_
Smp_063680	2.47769	2.58609	2.06678	1.67209	0.704718	0.661825	1.10774	0.947691	-1.36311	5e-05	0.000181778	2.60306	2.93549	2.32781	1.74628	0.505419	0.965482	0.512301	0.888571	-0.962133	3.3043e-08	2.21986e-07	1.63482	1.75372	1.37742	1.02728	0.256676	0.554811	0.283321	0.490832	-1.33836	4.52287e-09	2.40495e-08	GO:0016020,GO:0016021	hypothetical protein;note=predicted by EVM2;note=tmhmm%3B%3Bquery 1-645%3B;note=%3Bquery 291-294%3B;note=%3Bquery 353-597%3B;note=%3Bquery 271-290%3B;note=%3Bquery 295-317%3B;note=%3Bquery 330-352%3B;note=%3Bquery 598-620%3B;note=%3Bquery 1-270%3B;note=%3Bquery 318-329%3B;note=%3Bquery 621-645%3B;Smp_063680	Putative uncharacterized protein [Source:UniProtKB/TrEMBL;Acc:G4VA19]	_	_
Smp_000100	36.9546	25.4353	32.9367	32.255	11.9794	11.3098	15.5436	10.7707	-1.3629	5e-05	0.000181778	32.0402	49.1975	44.1411	39.984	10.2694	17.4455	9.84845	11.9385	-0.962318	2.50044e-16	4.02191e-15	19.1928	28.2715	25.0129	22.4537	4.92783	9.5846	5.09134	6.22577	-1.35604	1.7222e-20	2.61989e-19	GO:0005515,GO:0051015	filamin;Smp_000100	Filamin [Source:UniProtKB/TrEMBL;Acc:G4LVU8]	gi|256222411|ref|NP_001157789.1|	filamin-B isoform 1 [Homo sapiens]
Smp_131810	6.37583	6.30562	6.25257	6.57665	2.52967	2.41012	2.3206	2.66549	-1.36183	5e-05	0.000181778	8.94378	9.2651	8.99603	8.7829	2.28184	2.71178	1.93447	2.49718	-1.08697	1.05311e-39	7.24881e-38	5.58809	5.52719	5.45368	5.23903	1.22476	1.65377	1.22386	1.5956	-1.40213	1.21445e-44	6.42605e-43	GO:0036066,GO:0046922	GDP fucose protein O fucosyltransferase 2;Smp_131810	Putative uncharacterized protein [Source:UniProtKB/TrEMBL;Acc:G4LW62]	gi|34147487|ref|NP_598368.2|	GDP-fucose protein O-fucosyltransferase 2 isoform C [Homo sapiens]
Smp_174260	2.03449	2.16766	2.02682	2.75882	1.00145	0.902326	0.78175	0.821647	-1.35766	5e-05	0.000181778	2.31772	2.50372	2.5889	2.95176	0.725395	0.881479	0.721472	0.787686	-0.934855	3.74931e-11	3.6692e-10	1.40419	1.47269	1.51624	1.68945	0.355773	0.494863	0.384643	0.421987	-1.33562	1.97919e-14	1.85105e-13	GO:0003677,GO:0003700,GO:0003707,GO:0004887,GO:0005634,GO:0006351,GO:0006355,GO:0008270,GO:0030522,GO:0043401,GO:0043565,GO:0046872	thyroid hormone receptor alpha;Smp_174260	Thyroid hormone receptor,putative [Source:UniProtKB/TrEMBL;Acc:C4QMG1]	_	_
Smp_002100	116.386	134.305	114.822	124.308	50.7677	45.9097	54.7875	39.7764	-1.35686	5e-05	0.000181778	261.661	245.693	245.894	238.477	68.3629	93.8887	68.2903	71.119	-0.931284	5.67857e-43	4.54323e-41	158.221	142.206	141.259	135.728	33.6945	52.3999	36.4168	38.256	-1.30667	2.98097e-36	1.12929e-34	GO:0006810,GO:0016020,GO:0016021,GO:0016192	Vesicle transport protein SFT2B;note=pfam_scan%3BPfam:PF04178.7%3B%3BE()%3D1.1E-26%3Bscore%3D93.1%3Bque ry 49-161%3Bdescription%3DGot1;note=iprscan%3BInterPro:IPR011691 : SFT2-like%3BPfam:PF07770%3B%3Bscore%3D9.4E-51%3Bquery 34-156%3Bdescription%3DSFT2-like;Smp_002100	Putative uncharacterized protein [Source:UniProtKB/TrEMBL;Acc:G4VLK5]	gi|21553317|ref|NP_660152.1|	vesicle transport protein SFT2A [Homo sapiens]
Smp_050220	76.038	85.547	58.2372	67.6817	32.8922	26.733	26.3874	26.248	-1.35673	5e-05	0.000181778	100.624	96.3467	79.2933	78.7018	26.881	28.0668	22.6192	26.3249	-0.962013	8.24849e-23	2.21899e-21	61.9998	56.5226	46.762	46.2947	13.2764	15.7648	12.4586	14.2583	-1.37077	6.81948e-29	1.78961e-27	GO:0006836,GO:0019905	complexin;Smp_050220	Complexin, putative [Source:UniProtKB/TrEMBL;Acc:G4LWK6]	_	_
SmVG_022083:Smp_127790	4.13396	3.22915	3.14879	3.03416	1.51527	1.08238	1.44112	1.25335	-1.35595	5e-05	0.000181778	3.38209	4.60117	3.73454	3.06567	1.03859	1.36515	0.604848	1.16098	-1.03509	8.0601e-11	7.63911e-10	2.19266	2.89572	2.26049	1.92679	0.51306	0.797827	0.474176	0.62341	-1.41971	1.57566e-18	2.07026e-17		hypothetical protein;Smp_127790	Putative uncharacterized protein [Source:UniProtKB/TrEMBL;Acc:G4VMN4]	_	_
SmVG_022083:Smp_127800	4.13396	3.22915	3.14879	3.03416	1.51527	1.08238	1.44112	1.25335	-1.35595	5e-05	0.000181778	3.38209	4.60117	3.73454	3.06567	1.03859	1.36515	0.604848	1.16098	-1.03509	8.0601e-11	7.63911e-10	2.19266	2.89572	2.26049	1.92679	0.51306	0.797827	0.474176	0.62341	-1.41971	1.57566e-18	2.07026e-17		histone lysine N methyltransferase SETDB;Smp_127800	Putative sap-97 [Source:UniProtKB/TrEMBL;Acc:G4VMN5]	_	_
Smp_196090	8.2143	5.79212	5.73775	7.07099	3.23355	1.69423	2.99524	2.55375	-1.35585	5e-05	0.000181778	6.73515	10.2127	7.49413	8.35826	2.68709	3.36084	1.49226	2.90236	-0.914489	1.39915e-07	8.52149e-07	4.24371	6.12533	4.48286	4.97207	1.31032	1.8935	0.846379	1.59108	-1.28116	4.98586e-12	3.72829e-11	GO:0016020,GO:0016021,GO:0019887,GO:0030165,GO:0045859	kinase D interacting substrate of 220 kDa;Smp_196090	Putative tgf-beta receptor [Source:UniProtKB/TrEMBL;Acc:G4VFP5]	_	_
Smp_197760	9.40271	6.97714	4.27633	7.53908	3.66263	1.20681	4.13847	2.03018	-1.35296	5e-05	0.000181778	7.2613	11.5333	5.3808	8.11177	2.75944	4.16222	0.786271	1.89061	-1.06325	0.00379245	0.00977751	4.69228	7.04752	3.30114	4.92918	1.4816	2.49721	0.465496	1.13688	-1.33721	0.000186151	0.000489961	GO:0005049,GO:0005488,GO:0005643,GO:0005737,GO:0006611,GO:0008536	exportin 7;Smp_197760	DNA polymerase I, putative [Source:UniProtKB/TrEMBL;Acc:G4LWD2]	gi|154448892|ref|NP_055839.3|	exportin-7 [Homo sapiens]
Smp_132630	15.9268	11.2578	9.23633	11.5125	5.24557	3.42211	7.10096	3.0314	-1.3503	5e-05	0.000181778	14.2106	22.9866	12.2788	15.2659	3.71236	8.51398	3.09628	3.53246	-1.00465	2.19495e-05	9.2332e-05	9.8182	14.729	7.52479	9.58018	2.19039	5.29656	1.8078	1.98223	-1.31911	5.66663e-06	1.93368e-05		hypothetical protein;Smp_132630	Putative uncharacterized protein [Source:UniProtKB/TrEMBL;Acc:G4LUE5]	_	_
Smp_145040	7.49602	7.30322	6.77407	7.78103	2.94362	2.44636	2.89502	3.23271	-1.34972	5e-05	0.000181778	9.93826	10.6618	10.2824	10.3067	2.87578	3.77325	2.78475	4.07171	-0.863978	5.92144e-18	1.11557e-16	6.03362	6.21869	5.89463	5.86216	1.40229	2.09381	1.47643	2.15471	-1.20612	2.6356e-20	3.94773e-19	GO:0016020,GO:0016021,GO:0055085	hypothetical protein;Smp_145040	Putative uncharacterized protein [Source:UniProtKB/TrEMBL;Acc:G4VJU3]	gi|144953907|ref|NP_060164.3|	major facilitator superfamily domain-containing protein 6 [Homo sapiens]
SmVG_007665:Smp_139900	9.44845	8.29465	7.48093	7.10913	3.01701	3.01875	3.81297	2.84086	-1.34937	5e-05	0.000181778	10.1199	11.9477	9.46397	8.51704	2.25158	3.87655	2.58923	2.62602	-1.01424	6.03343e-22	1.56172e-20	6.34772	7.2165	5.69352	5.06679	1.14704	2.28104	1.47718	1.47569	-1.39463	2.93187e-22	4.95568e-21		lysophosphatidic acid phosphatase type 6;Smp_139900	Putative lysophosphatidic acid phosphatase [Source:UniProtKB/TrEMBL;Acc:G4VDI7]	gi|151301213|ref|NP_057445.3|	lysophosphatidic acid phosphatase type 6 precursor [Homo sapiens]
SmVG_007665:Smp_210240	9.44845	8.29465	7.48093	7.10913	3.01701	3.01875	3.81297	2.84086	-1.34937	5e-05	0.000181778	10.1199	11.9477	9.46397	8.51704	2.25158	3.87655	2.58923	2.62602	-1.01424	6.03343e-22	1.56172e-20	6.34772	7.2165	5.69352	5.06679	1.14704	2.28104	1.47718	1.47569	-1.39463	2.93187e-22	4.95568e-21		lysophosphatidic acid phosphatase type 6;Smp_210240	Cdc50-related [Source:UniProtKB/TrEMBL;Acc:G4VDI8]	_	_
Smp_062560	13.862	12.3198	13.5031	13.766	4.7036	6.39755	4.95479	4.93493	-1.34845	5e-05	0.000181778	14.5971	16.8952	16.9216	15.5533	3.13773	5.10417	4.78974	4.45776	-1.04337	4.12204e-23	1.12611e-21	9.21326	10.209	10.1412	9.22637	1.6282	2.97295	2.71225	2.49895	-1.46843	1.50408e-23	2.80532e-22	GO:0004930,GO:0005515,GO:0007186,GO:0007275,GO:0016021,GO:0016055,GO:0017147,GO:0035567,GO:0042813,GO:0060070	secreted frizzled protein;Smp_062560	Putative wnt inhibitor frzb2 [Source:UniProtKB/TrEMBL;Acc:G4VJK4]	gi|188528609|ref|NP_003006.2|	secreted frizzled-related protein 5 precursor [Homo sapiens]
SmVG_024080:Smp_167820	15.6127	12.5606	13.273	14.2113	5.11825	5.78423	5.42025	5.54601	-1.34771	5e-05	0.000181778	13.6525	17.6287	15.6355	15.4145	3.86108	5.24254	4.10839	5.05664	-0.971161	6.19057e-40	4.33375e-38	8.42303	10.4574	9.09101	8.93056	1.86691	2.93172	2.22385	2.76549	-1.37789	3.56439e-41	1.65252e-39		solute carrier family 12 k cl cotransporter;Smp_167820	Putative solute carrier family 12, k-cl cotransporter [Source:UniProtKB/TrEMBL;Acc:G4VRA2]	gi|225579061|ref|NP_001139433.1|	solute carrier family 12 member 4 isoform b [Homo sapiens]
SmVG_024080:Smp_198430	15.6127	12.5606	13.273	14.2113	5.11825	5.78423	5.42025	5.54601	-1.34771	5e-05	0.000181778	13.6525	17.6287	15.6355	15.4145	3.86108	5.24254	4.10839	5.05664	-0.971161	6.19057e-40	4.33375e-38	8.42303	10.4574	9.09101	8.93056	1.86691	2.93172	2.22385	2.76549	-1.37789	3.56439e-41	1.65252e-39		solute carrier family 12;Smp_198430	Putative solute carrier family 12, electroneutral k-cl cotransporter [Source:UniProtKB/TrEMBL;Acc:G4VRA3]	gi|110224449|ref|NP_598408.1|	solute carrier family 12 member 6 isoform a [Homo sapiens]
SmVG_016549	1.48371	0.722845	2.16162	1.45892	0.746146	0.50298	0.580784	0.462267	-1.34606	0.0002	0.000662986	1.73527	2.3427	3.85834	2.03272	0.919514	1.15529	0.786026	1.47125	-0.536941	0.00907421	0.0209291	1.73086	2.43569	3.32329	1.74504	0.700347	0.983935	0.520683	1.15329	-0.892962	0.000776587	0.00182497
Smp_152410	3.97051	3.50113	3.44878	3.19167	1.21549	1.56016	1.91181	0.867824	-1.345	0.00095	0.0027228	4.01148	4.93679	4.32834	3.80726	0.897141	1.87638	1.11304	0.884389	-1.05593	4.72685e-11	4.5894e-10	2.56443	3.03116	2.60495	2.26176	0.447755	1.12581	0.635843	0.502254	-1.42116	4.81129e-12	3.60883e-11	GO:0005515	hypothetical protein;note=pfam_scan%3BPfam:PF07679.11%3B%3BE()%3D3.3E-6%3Bscore%3D26.7%3Bque ry 90-124%3Bdescription%3DI-set;note=iprscan%3BInterPro:IPR013098 : Immunoglobulin I-set%3BPfam:PF07679%3B%3Bscore%3D2.2E-6%3Bquery 90-123%3Bdescription%3DImmunoglobulin I-set;Smp_152410	Putative uncharacterized protein [Source:UniProtKB/TrEMBL;Acc:G4VSQ3]	_	_
Smp_148200	4.33101	4.37867	3.74345	3.77884	1.51157	1.92205	1.03981	1.92802	-1.34237	5e-05	0.000181778	4.96825	5.37461	4.88084	4.46069	1.10318	1.11424	1.44698	1.83671	-1.03294	4.16801e-17	7.18238e-16	3.07234	3.25799	2.86351	2.58439	0.532708	0.648469	0.816868	0.995356	-1.45443	6.66554e-16	7.1471e-15		junctophilin 2;Smp_148200	Putative junctophilin [Source:UniProtKB/TrEMBL;Acc:G4VSA4]	gi|21735575|ref|NP_065698.1|	junctophilin-1 [Homo sapiens]
Smp_094890	5.86022	5.4381	4.68381	6.03545	2.6834	1.63713	2.1906	2.17762	-1.34144	5e-05	0.000181778	5.84698	7.06686	5.81555	6.68524	1.97083	2.28925	1.35277	2.23458	-0.931851	1.36009e-16	2.26454e-15	3.63425	4.17746	3.38159	3.88073	0.978752	1.32674	0.728481	1.2124	-1.30065	4.53019e-18	5.72062e-17	GO:0005622,GO:0005737,GO:0007165,GO:0043087	hypothetical protein;Smp_094890	Putative uncharacterized protein [Source:UniProtKB/TrEMBL;Acc:G4M119]	_	_
Smp_126010	3.50462	3.4141	3.19858	2.42378	0.995516	1.59925	1.54707	0.810919	-1.34036	0.0023	0.00601757	4.45911	5.43623	4.58009	3.74118	0.798005	2.53906	2.00196	1.7905	-0.704389	0.0129446	0.0285786	2.7566	3.73399	2.75273	2.16843	0.522588	1.49678	1.08643	0.97602	-0.885214	0.00154575	0.003425	GO:0004930,GO:0007186,GO:0007218,GO:0016020,GO:0016021	neuropeptide Y receptor invertebrate;Smp_126010	Putative neuropeptide receptor [Source:UniProtKB/TrEMBL;Acc:G4VB24]	gi|5453796|ref|NP_006165.1|	neuropeptide Y receptor type 5 [Homo sapiens]
Smp_104970	3.7301	3.03345	2.66457	3.65198	1.1452	1.5576	1.55957	0.906406	-1.33948	5e-05	0.000181778	3.10337	4.16349	3.16139	3.76066	0.759214	1.46099	1.12093	0.811544	-0.987065	5.68931e-10	4.83101e-09	1.9128	2.47402	1.84962	2.19254	0.3756	0.823075	0.602119	0.437421	-1.37434	8.33253e-11	5.40837e-10	GO:0005515,GO:0005578,GO:0005615,GO:0007409,GO:0016020,GO:0016021	leucine rich repeat containing protein 70;Smp_104970	Putative leucine-rich transmembrane protein [Source:UniProtKB/TrEMBL;Acc:G4VJW0]	_	_
Smp_210040	9.35037	12.796	8.98167	11.8647	4.35372	4.66712	4.226	3.76319	-1.33771	5e-05	0.000181778	9.81133	7.45953	8.43633	9.29737	2.16757	2.80363	2.64711	2.68406	-0.932795	3.05926e-07	1.76714e-06	7.81935	5.8227	6.60617	6.9591	1.55798	2.31833	1.85663	2.14432	-1.26585	7.52892e-11	4.92287e-10		hypothetical protein;Smp_210040	Putative uncharacterized protein [Source:UniProtKB/TrEMBL;Acc:G4VFP4]	_	_
SmVG_000886	13.9744	24.1182	22.4999	22.3349	6.2867	10.2473	7.44212	8.84765	-1.33711	5e-05	0.000181778	16.6151	8.44945	16.5827	13.1267	2.64481	4.39748	4.58448	4.4584	-0.924091	1.71556e-06	8.78528e-06	14.1613	8.33346	14.8036	12.5187	1.91417	3.61971	3.40901	3.83057	-1.42592	9.37823e-10	5.40915e-09
Smp_152710	53.0221	65.8886	53.6798	60.848	23.1356	25.5326	21.3658	22.375	-1.33694	5e-05	0.000181778	109.897	102.839	102.116	104.253	24.5258	29.5565	25.0042	28.1819	-1.10227	2.34016e-66	4.17872e-64	67.255	60.2259	59.4994	59.8371	12.2357	16.6709	13.4987	15.3169	-1.55539	6.24442e-61	6.2676e-59	GO:0005515,GO:0016740	glutathione s transferase omega;Smp_152710.2	Glutathione-s-transferase omega,putative [Source:UniProtKB/TrEMBL;Acc:G4M1D8]	_	_
Smp_016630	18.3831	17.2513	17.5084	17.0953	6.81927	7.59983	6.13981	7.254	-1.3365	5e-05	0.000181778	8.52159	14.9469	9.90603	9.84978	1.07917	1.9621	0.718179	1.30969	-1.92489	8.55404e-22	2.1866e-20	11.1779	12.8251	11.654	10.3203	2.24833	3.1945	2.5984	3.34623	-1.47034	7.57091e-57	6.35435e-55	GO:0000166,GO:0003924,GO:0004871,GO:0005525,GO:0006184,GO:0007165,GO:0007186,GO:0019001,GO:0031683	trimeric G protein alpha o subunit;Smp_016630	Putative trimeric G-protein alpha o subunit [Source:UniProtKB/TrEMBL;Acc:G4VKX0]	_	_
Smp_077310	5.67737	8.92154	8.03206	7.41762	1.26672	3.89506	2.4691	4.27722	-1.33535	5e-05	0.000181778	15.2485	13.7473	16.3129	16.6409	2.19179	2.984	4.5678	5.18758	-1.19612	3.34341e-10	2.9133e-09	10.6995	8.95179	10.6774	10.6387	1.20987	1.96073	2.74015	3.28348	-1.63842	1.34385e-12	1.05514e-11	GO:0005509,GO:0005875,GO:0007017,GO:0030286	tegument-allergen-like protein;Smp_077310	Putative tegumental protein; Tegumental antigen [Source:UniProtKB/TrEMBL;Acc:G4VTN2]	_	_
SmVG_022323	6.14648	5.47852	5.72688	5.86114	1.91957	2.33755	2.4032	2.55501	-1.33283	5e-05	0.000181778	4.14371	4.86548	5.26461	4.26776	0.885504	1.30332	1.02861	1.45457	-1.12896	4.35153e-20	9.80168e-19	3.56616	4.13076	4.22623	3.43613	0.770366	1.27925	0.916506	1.25504	-1.31849	9.62091e-24	1.81529e-22
Smp_131470	4.53019	6.25424	4.34378	5.11036	1.7354	2.42923	1.53762	2.33647	-1.33207	5e-05	0.000181778	8.63508	6.0081	5.83873	7.11035	1.56825	2.14321	2.22595	2.47514	-0.921976	4.88987e-12	5.27105e-11	6.63773	4.90396	4.69704	5.26535	0.880863	1.44914	1.18119	1.6443	-1.52492	2.28196e-17	2.72938e-16	GO:0016020,GO:0016021	hypothetical protein;Smp_131470	Putative uncharacterized protein [Source:UniProtKB/TrEMBL;Acc:G4VTK0]	_	_
Smp_133950	2.53083	3.0559	2.24545	2.63325	1.14838	0.984429	1.10329	0.926118	-1.33021	5e-05	0.000181778	3.60993	3.29658	2.96931	3.15821	1.04317	1.25489	0.871857	0.876305	-0.905362	1.54044e-07	9.29925e-07	2.18459	1.97782	1.84271	1.86113	0.529741	0.75975	0.495328	0.505198	-1.22653	1.40264e-10	8.85035e-10		hypothetical protein;note=term%3Dstructural%3Bdate%3D20110906%3Bqualifier%3Dtranscript coordinates changed based on RNA-seq evidence %255CSmp_178550 merged to Smp_133950%3BcuratorName%3Dap6@sanger.ac.uk;Smp_133950	Putative uncharacterized protein [Source:UniProtKB/TrEMBL;Acc:G4VDU8]	_	_
Smp_015630	21.5768	20.7818	18.6822	17.6217	8.44925	6.29039	9.65383	6.89345	-1.33012	5e-05	0.000181778	20.2121	22.0668	21.0371	18.0829	5.35999	8.0797	4.26528	5.64552	-1.00899	8.04587e-24	2.3108e-22	12.7337	13.4755	12.5073	10.6306	2.79747	4.85639	2.41543	3.3161	-1.33717	2.67655e-23	4.87994e-22	GO:0005230,GO:0005254,GO:0005886,GO:0006810,GO:0006811,GO:0006821,GO:0016020,GO:0016021,GO:0030054,GO:0034220,GO:0045202,GO:0045211,GO:1902476	glycine receptor subunit alpha 1;Smp_015630	Putative cys-loop ligand gated ion channel subunit [Source:UniProtKB/TrEMBL;Acc:G4VSK4]	gi|169646723|ref|NP_001112357.1|	glycine receptor subunit alpha-2 isoform A precursor [Homo sapiens]
Smp_146610	3.14746	4.1121	4.54075	5.00426	2.44571	1.53108	1.65629	1.0554	-1.3291	5e-05	0.000181778	4.45311	3.70186	5.49746	5.72872	1.75786	1.92762	0.97302	1.33775	-0.91172	5.95937e-07	3.28967e-06	2.85687	2.21813	3.3577	3.44043	0.914678	1.12593	0.55526	0.754516	-1.27016	3.46423e-07	1.43218e-06		hypothetical protein;Smp_146610	Putative uncharacterized protein [Source:UniProtKB/TrEMBL;Acc:G4VBR1]	_	_
Smp_149580	1.85838	0.955932	1.35365	0.528737	0.558511	0	0.760509	0.552426	-1.32749	0.0094	0.0208896	1.93579	3.2928	2.65731	1.9793	0.541971	1.06256	0.4944	0.874024	-0.92823	0.00040396	0.00130566	1.3377	1.99862	1.5942	1.18234	0.286264	0.624904	0.426178	0.496175	-1.20032	2.40603e-05	7.40365e-05	GO:0004930,GO:0007186,GO:0016020,GO:0016021	fmrfamide receptor;Smp_149580	Peptide (FMRFamide/somatostatin)-like receptor,putative [Source:UniProtKB/TrEMBL;Acc:G4LXZ6]	gi|50897278|ref|NP_001002911.1|	probable G-protein coupled receptor 139 [Homo sapiens]
Smp_141030	13.6932	12.2629	8.02162	11.0627	6.30462	3.38328	4.64907	3.65156	-1.32414	5e-05	0.000181778	27.8303	33.3836	21.8026	25.0568	6.57905	11.4115	4.28724	6.71482	-1.07453	8.09206e-09	5.92408e-08	21.32	22.9721	15.0272	18.8911	4.4747	7.73558	2.71026	4.16725	-1.45669	1.60578e-10	1.00512e-09		epidermal growth factor receptor pathway%3B epidermal growth factor receptor kinase;Smp_141030	Putative uncharacterized protein [Source:UniProtKB/TrEMBL;Acc:G4M1Z2]	gi|21264616|ref|NP_073609.2|	epidermal growth factor receptor kinase substrate 8-like protein 2 [Homo sapiens]
Smp_156150	5.41212	4.27205	4.89652	5.14217	1.88256	1.89577	2.01173	2.08885	-1.3238	5e-05	0.000181778	5.21195	6.9528	6.69046	6.39767	1.69653	2.51804	1.8149	2.46227	-0.84012	1.1612e-26	3.90907e-25	3.31118	4.19153	4.04226	3.7648	0.927452	1.48682	1.00237	1.42977	-1.11971	7.34949e-23	1.29628e-21	GO:0005516,GO:0005886,GO:0006813,GO:0015269,GO:0016020,GO:0016021,GO:0016286,GO:0043025,GO:0071805	small conductance calcium activated potassium;Smp_156150	Calcium-activated potassium channel [Source:UniProtKB/TrEMBL;Acc:G4LXV9]	gi|25777645|ref|NP_067627.2|	small conductance calcium-activated potassium channel protein 2 isoform a [Homo sapiens]
Smp_089460	172.923	135.838	130.312	148.969	60.8019	47.4685	80.2204	46.6593	-1.32234	5e-05	0.000181778	195.436	246.744	203.958	210.663	61.6526	100.639	51.9634	65.0925	-0.88534	5.16799e-14	6.73807e-13	123.782	148.258	122.751	125.013	32.0553	58.791	29.4408	36.6843	-1.22848	9.10709e-18	1.12664e-16	GO:0004198,GO:0005509,GO:0005622,GO:0006508,GO:0008233,GO:0008234,GO:0016787	calpain A;Smp_089460	Family C2 unassigned peptidase (C02 family) [Source:UniProtKB/TrEMBL;Acc:G4VDT5]	gi|4557405|ref|NP_000061.1|	calpain-3 isoform a [Homo sapiens]
Smp_134210	24.4555	20.8258	20.4331	23.5854	9.1449	7.9711	13.4319	5.28474	-1.31738	5e-05	0.000181778	23.0227	29.9416	25.5689	26.5442	6.80911	13.0007	5.73994	5.16221	-1.03294	2.30973e-07	1.3558e-06	14.1779	17.6045	14.966	15.4039	3.40152	7.33832	3.16306	2.81644	-1.38683	1.70662e-10	1.06647e-09		peptidase inhibitor 16;note=predicted by EVM2;note=pfam_scan%3BPfam:PF00339.24%3B%3BE()%3D6.7E-11%3Bscore%3D42.1%3Bqu ery 132-222%3Bdescription%3DArrestin_N;note=iprscan%3BInterPro:IPR011021 : Arrestin-like%2C N-terminal%3BPfam:PF00339%3B%3Bscore%3D1.9E-10%3Bquery 170-222%3Bdescription%3DArrestin-like%2C N-terminal;Smp_134210
Smp_029480	3.70993	4.01528	3.58097	3.46477	1.55761	1.75054	1.53615	1.08319	-1.31727	5e-05	0.000181778	4.92951	5.13181	4.72764	4.64774	1.44438	1.79697	1.45002	1.12975	-0.95238	2.20609e-14	2.96415e-13	3.12992	3.10644	2.82022	2.76675	0.76215	1.04417	0.841306	0.701215	-1.28164	3.58419e-15	3.5864e-14	GO:0005515	Bardet Biedl syndrome 4 protein;Smp_029480	Bardet-biedl syndrome 4-like protein [Source:UniProtKB/TrEMBL;Acc:G4LW93]	gi|25952122|ref|NP_149017.2|	Bardet-Biedl syndrome 4 protein [Homo sapiens]
Smp_127170	2.75199	3.41157	2.73837	3.27922	0.928243	1.27434	1.36414	1.32872	-1.31514	5e-05	0.000181778	4.04045	3.77265	3.77388	4.14646	0.857688	1.46086	0.848833	1.23701	-1.02858	8.80122e-11	8.30321e-10	2.59016	2.34787	2.32646	2.50905	0.453225	0.871572	0.544263	0.703264	-1.40336	1.55839e-15	1.61581e-14	GO:0005267,GO:0005887,GO:0006810,GO:0006811,GO:0016020,GO:0016021,GO:0022841,GO:0030322,GO:0071805	hypothetical protein;Smp_127170	Twik family of potassium channels-related [Source:UniProtKB/TrEMBL;Acc:G4V9R5]	gi|20143944|ref|NP_612190.1|	potassium channel subfamily K member 10 isoform 2 [Homo sapiens]
Smp_144960	5.01046	3.94944	3.46669	4.12287	2.32596	1.24007	1.95523	1.13049	-1.31498	5e-05	0.000181778	4.0913	5.52644	4.01802	4.38748	1.54603	1.7696	0.883827	0.951132	-1.02591	1.88654e-07	1.11912e-06	2.54865	3.29733	2.35407	2.56654	0.78326	1.01371	0.484399	0.520731	-1.39364	7.58738e-10	4.41811e-09		FTS and Hook interacting protein;note=predicted by EVM2;note=pfam_scan%3BPfam:PF10257.4%3B%3BE()%3D3.1E-32%3Bscore%3D111.7%3Bqu ery 23-397%3Bdescription%3DRAI16-like;note=iprscan%3BInterPro:IPR019384 : Retinoic acid induced 16-like protein%3BPfam:PF10257%3B%3Bscore%3D2.2E-10%3Bquery 14-405%3Bdescription%3DRetinoic acid induced 16-like protein;Smp_144960	Putative uncharacterized protein [Source:UniProtKB/TrEMBL;Acc:G4VJR7]	_	_
SmVG_006287	4.47148	3.18436	2.24491	3.01336	1.55052	0.764501	1.86799	1.01199	-1.31375	5e-05	0.000181778	3.27212	5.19463	2.7526	3.19476	1.06434	1.73793	0.564895	1.0402	-0.96583	6.48252e-05	0.000247586	2.39136	3.7014	1.99588	2.32926	0.686719	1.22948	0.369725	0.675613	-1.27971	2.80817e-06	1.0059e-05
SmVG_028751:Smp_163500	8.1153	6.94425	5.88984	6.82871	2.86213	2.64408	3.20831	2.46215	-1.31346	5e-05	0.000181778	7.74126	9.82781	7.3889	7.63286	2.11309	3.17846	1.90295	2.3417	-0.982156	3.13131e-22	8.17391e-21	4.79851	5.80731	4.29892	4.40745	1.0626	1.82686	1.07695	1.30528	-1.35242	1.28867e-25	2.75143e-24		Protein Sprint;Smp_163500	Putative uncharacterized protein [Source:UniProtKB/TrEMBL;Acc:G4LXD9]	_	_
SmVG_028751:Smp_163510	8.1153	6.94425	5.88984	6.82871	2.86213	2.64408	3.20831	2.46215	-1.31346	5e-05	0.000181778	7.74126	9.82781	7.3889	7.63286	2.11309	3.17846	1.90295	2.3417	-0.982156	3.13131e-22	8.17391e-21	4.79851	5.80731	4.29892	4.40745	1.0626	1.82686	1.07695	1.30528	-1.35242	1.28867e-25	2.75143e-24		Protein Sprint;note=predicted by EVM2;Smp_163510	Putative uncharacterized protein [Source:UniProtKB/TrEMBL;Acc:G4LXE0]	_	_
SmVG_028751:Smp_163530	8.1153	6.94425	5.88984	6.82871	2.86213	2.64408	3.20831	2.46215	-1.31346	5e-05	0.000181778	7.74126	9.82781	7.3889	7.63286	2.11309	3.17846	1.90295	2.3417	-0.982156	3.13131e-22	8.17391e-21	4.79851	5.80731	4.29892	4.40745	1.0626	1.82686	1.07695	1.30528	-1.35242	1.28867e-25	2.75143e-24		hypothetical protein;Smp_163530	Putative uncharacterized protein [Source:UniProtKB/TrEMBL;Acc:G4LXE2]	_	_
Smp_086530	1074.86	1242.52	1072.95	1265.54	393.405	553.331	475.47	454.6	-1.31077	5e-05	0.000181778	1158.62	1079.31	1109.72	1185.1	243.323	388.457	338.805	355.552	-0.964037	3.05776e-34	1.62391e-32	742.389	662.577	674.439	716.222	127.436	229.211	196.125	202.81	-1.35594	1.27555e-29	3.46892e-28	GO:0005509,GO:0005875,GO:0007017,GO:0030286	tegument-allergen-like protein;Sm20.8%3Bcurrent%3Dfalse;Smp_086530	Putative tegumental protein Sm 20.8; Sm 20.8; Tegumental antigen Sm20.8; Tegumental protein Sm 20.8 [Source:UniProtKB/TrEMBL;Acc:P91804]	_	_
Smp_084010	27.1655	28.2436	23.1333	25.4222	9.75568	11.35	11.6163	9.30897	-1.30657	5e-05	0.000181778	30.8228	30.9109	27.5069	27.2285	7.14488	10.8123	8.03028	8.53	-0.962135	4.0724e-36	2.38933e-34	19.0385	18.3495	16.088	15.7702	3.55826	6.1375	4.38872	4.59549	-1.35108	1.42252e-34	5.01798e-33	GO:0016020,GO:0016021	hypothetical protein;Smp_084010	Putative uncharacterized protein [Source:UniProtKB/TrEMBL;Acc:G4VRF1]	_	_
Smp_213910	32.4208	27.7931	38.3515	36.1806	12.8718	15.1538	12.5633	13.9154	-1.3058	5e-05	0.000181778	38.4228	45.6693	54.2578	48.1574	12.3217	14.9647	14.9947	15.8716	-0.902975	3.14669e-34	1.66397e-32	22.4552	25.5574	29.9995	26.4001	5.73317	8.03079	7.53999	8.11853	-1.27441	2.13703e-27	5.02563e-26	GO:0005201,GO:0005581	type IV collagen alpha 1 chain;Smp_213910
Smp_173240	33.3813	25.8565	25.3071	25.0678	11.3132	8.9439	14.6443	9.43812	-1.30575	5e-05	0.000181778	28.3867	39.5956	31.0863	28.1535	8.5312	14.9393	6.79281	9.38244	-0.936303	5.89606e-11	5.64455e-10	16.7406	22.5708	17.4775	15.6365	4.02856	8.09908	3.4401	4.85058	-1.2838	1.58581e-14	1.50189e-13		cement protein 3B variant 3;Smp_173240	Putative cement protein 3B variant 3 [Source:UniProtKB/TrEMBL;Acc:G4VJZ9]	_	_
Smp_152060	20.6516	21.14	20.8996	23.9394	9.8669	9.09318	7.33188	8.75813	-1.30546	5e-05	0.000181778	25.1051	26.0971	26.8698	28.3076	7.73412	7.90844	7.36774	9.11568	-0.937782	2.41299e-39	1.64257e-37	15.1144	15.0434	15.3447	16.0399	3.76077	4.39425	3.88046	4.84945	-1.31671	3.24671e-33	1.08625e-31	GO:0005515	RAS protein activator1;Smp_152060	Putative uncharacterized protein [Source:UniProtKB/TrEMBL;Acc:G4VB94]	_	_
Smp_169090	64.7043	28.751	20.8889	50.2852	5.84473	40.6848	10.4685	9.71453	-1.30319	5e-05	0.000181778	29.9693	71.3002	23.7831	51.1392	4.15118	9.59343	28.5539	8.45545	-1.12703	0.0193619	0.0406124	17.5932	40.1104	13.251	27.9986	1.93606	5.18724	14.3559	4.40406	-1.32093	0.0114109	0.0209463	GO:0016020,GO:0016021,GO:0055085	solute carrier family 43;Smp_169090	Putative uncharacterized protein [Source:UniProtKB/TrEMBL;Acc:G4VCC9]	_	_
Smp_147550	2.02541	1.70105	1.42134	1.66478	0.536588	0.721171	0.849349	0.655065	-1.3024	0.00015	0.000507999	1.76703	2.26438	1.53549	1.64923	0.385183	0.745746	0.460428	0.661148	-0.905061	2.85022e-05	0.000117176	1.10414	1.45724	1.04182	1.0087	0.226499	0.439432	0.317126	0.309394	-1.26399	3.78345e-07	1.54876e-06	GO:0005887,GO:0016020,GO:0016021,GO:0022841,GO:0030322,GO:0071805	twik family of potassium channels;Smp_147550	Twik family of potassium channels-related [Source:UniProtKB/TrEMBL;Acc:G4VBJ3]	_	_
SmVG_031240	4.78221	3.26473	3.29448	3.41612	1.09576	1.99021	1.53828	1.36009	-1.30219	5e-05	0.000181778	3.22491	5.36015	3.86743	3.43635	0.839879	1.4711	1.47684	1.18366	-0.904381	4.0686e-09	3.08487e-08	2.04341	3.15493	2.25651	2.01146	0.408329	0.813126	0.794236	0.642125	-1.29138	2.83933e-10	1.7496e-09	GO:0008271,GO:0008272,GO:0016020,GO:0055085,GO:0015116,GO:0016021
SmVG_035877	3.27329	2.66028	6.56199	3.11491	1.35012	1.21167	1.45375	2.31785	-1.30146	5e-05	0.000181778	2.49441	3.0049	6.57144	3.06571	0.936358	1.21965	0.80231	1.74744	-0.869299	9.86388e-05	0.000362244	1.82487	2.29683	4.76129	2.07168	0.652639	1.05775	0.677664	1.4203	-0.977794	0.00124052	0.00279319
SmVG_002891	216.356	245.823	208.085	236.362	87.0555	99.8691	104.225	77.5386	-1.29811	5e-05	0.000181778	556.185	544.283	542.181	554.756	149.882	212.489	149.936	152.889	-0.940275	1.77869e-35	1.00529e-33	342.381	322.737	314.782	321.255	77.0852	123.856	86.6432	90.5231	-1.2436	1.14053e-31	3.45925e-30	GO:0005875,GO:0007017
Smp_204390	5.16433	5.61565	4.65328	6.14562	2.01873	2.09727	2.77296	1.8946	-1.29674	5e-05	0.000181778	5.20154	5.15949	4.94963	5.67521	1.2491	2.31122	1.36621	1.51653	-0.947229	1.26075e-18	2.50948e-17	3.26875	3.09619	2.929	3.33228	0.63366	1.31425	0.726758	0.83485	-1.3312	1.51597e-16	1.71422e-15		hypothetical protein;Smp_204390	Putative uncharacterized protein Smp_204390 [Source:UniProtKB/TrEMBL;Acc:G4LX22]	_	_
Smp_204050	4.0652	2.91151	5.02404	3.87164	1.20276	1.94698	1.46861	1.869	-1.29082	5e-05	0.000181778	5.61633	6.49791	8.07067	6.37489	1.67338	2.40491	2.60305	2.537	-0.803146	2.24317e-16	3.62705e-15	4.19592	4.5443	5.88241	4.3494	1.15525	1.62458	1.67805	1.80815	-1.05963	1.61548e-12	1.26332e-11	GO:0004672,GO:0004674,GO:0005524,GO:0005622,GO:0006468,GO:0016772,GO:0018105,GO:0035556	serine:threonine protein kinase Sgk1;note=iprscan%3BPANTHER:PTHR22985:SF70%3B%3Bscore%3D6.3E-91%3Bquery 2-152%3Bdescription%3Dnull;note=iprscan%3BInterPro:IPR017442 : Serine/threonine protein kinase-related%3BPfam:PF00069%3B%3Bscore%3D5.9E-45%3Bquery 2-152%3Bdescription%3DSerine/threonine protein kinase-related;Smp_204050	Putative uncharacterized protein Smp_204050 [Source:UniProtKB/TrEMBL;Acc:G4VP53]	gi|31563382|ref|NP_037389.4|	serine/threonine-protein kinase Sgk3 isoform 1 [Homo sapiens]
Smp_166890	43.8476	40.1957	34.3456	36.4474	16.1146	12.3454	20.9308	13.8967	-1.29075	5e-05	0.000181778	39.9414	47.6806	38.4808	37.0319	10.8024	18.7991	8.08399	11.7259	-0.974386	2.29917e-11	2.30122e-10	25.1465	28.7251	22.9878	21.9655	5.50842	10.8653	4.45368	6.47032	-1.33703	1.177e-15	1.22953e-14		ATPase;Smp_166890	ATPase, putative [Source:UniProtKB/TrEMBL;Acc:G4M1D0]	_	_
Smp_144380	6.33558	4.37882	5.13865	5.09029	1.92489	1.7342	2.88522	2.01734	-1.29053	5e-05	0.000181778	4.3295	6.50056	5.81773	5.00713	1.23122	2.4608	1.10565	1.75788	-0.969291	1.25857e-11	1.29439e-10	2.71255	3.98739	3.45018	2.99081	0.669556	1.49445	0.601709	0.96943	-1.29604	1.09832e-10	7.02115e-10	GO:0003677,GO:0003700,GO:0005634,GO:0006355,GO:0016020,GO:0016021,GO:0043565	homeobox protein MSH C;Smp_144380	Msx family homeobox protein [Source:UniProtKB/TrEMBL;Acc:G4VFQ3]	gi|118582284|ref|NP_002439.2|	homeobox protein MSX-1 [Homo sapiens]
Smp_172200	6.62757	5.20014	4.41353	4.33017	2.17636	1.64135	2.46298	2.12898	-1.29052	5e-05	0.000181778	6.58565	8.41403	5.88204	5.29407	2.08702	2.99803	1.48224	2.40513	-0.824718	9.79406e-09	7.05276e-08	4.05489	4.97265	3.53164	3.0779	1.07277	1.68912	0.815503	1.32906	-1.13282	6.33352e-10	3.71913e-09	GO:0000166,GO:0004672,GO:0004713,GO:0004715,GO:0005515,GO:0005524,GO:0006468,GO:0016301,GO:0016310,GO:0016740,GO:0016772,GO:0018108	tyrosine protein kinase Fyn;Smp_172200	Tyrosine kinase [Source:UniProtKB/TrEMBL;Acc:G4VLP0]	gi|23510364|ref|NP_694593.1|	tyrosine-protein kinase Fyn isoform c [Homo sapiens]
Smp_141500	12.1469	15.3011	56.645	41.1839	4.35584	23.4381	6.48641	17.0132	-1.28827	0.0003	0.000957893	728.892	696.866	695.43	657.781	186.506	254.672	190.002	180.107	-0.93896	8.33669e-29	3.27122e-27	506.494	460.973	452.058	433.141	109.637	163.102	122.753	112.16	-1.30361	1.11167e-29	3.04023e-28		hypothetical protein;Smp_141500	Hypothetical Schistosoma spp. protein UPF0506 [Source:UniProtKB/TrEMBL;Acc:G4VMF0]	_	_
Smp_005880	26.388	24.3389	21.6098	24.5081	9.0432	9.59917	12.2649	8.76423	-1.28757	5e-05	0.000181778	42.1243	48.9027	43.6515	44.3248	10.6057	17.7372	11.0545	12.0399	-1.00122	3.00374e-30	1.26743e-28	25.1498	27.9167	24.7879	24.8604	5.13535	9.75608	5.81685	6.31362	-1.39674	1.12176e-31	3.41294e-30	GO:0004611,GO:0004613,GO:0005525,GO:0006094,GO:0016301,GO:0016310,GO:0017076	phosphoenolpyruvate carboxykinase;Smp_005880	Putative phosphoenolpyruvate carboxykinase [Source:UniProtKB/TrEMBL;Acc:G4V721]	gi|66346721|ref|NP_004554.2|	phosphoenolpyruvate carboxykinase [GTP], mitochondrial isoform 1 precursor [Homo sapiens]
SmVG_007207	18.864	16.5957	10.8608	14.9831	7.09562	4.36314	5.0208	8.65402	-1.28636	5e-05	0.000181778	13.5389	13.8785	6.93434	11.3031	2.28219	2.78056	3.14226	5.082	-0.914631	0.000797387	0.00242284	11.7889	14.8792	5.91101	11.0623	2.04874	2.54546	1.8533	3.90829	-1.3499	5.63514e-05	0.000162559
Smp_153070	8.47152	15.1277	8.65305	7.51169	3.52666	5.40496	2.81557	4.56534	-1.28548	5e-05	0.000181778	51.8735	33.1682	32.5398	28.9424	8.55016	9.30824	12.2316	15.9507	-0.881343	5.21166e-06	2.47258e-05	32.4448	19.9902	19.321	16.9694	4.35162	5.30066	6.56786	8.75178	-1.24307	8.04076e-07	3.12764e-06		hypothetical protein;Smp_153070	Putative uncharacterized protein [Source:UniProtKB/TrEMBL;Acc:G4VMV0]	_	_
Smp_101970	183.288	181.428	163.109	154.983	69.7875	68.9966	87.6018	53.8789	-1.28469	5e-05	0.000181778	340.929	384.29	342.078	311.37	101.053	155.424	95.7775	92.5349	-0.862614	5.3637e-15	7.68443e-14	213.646	232.554	205.116	182.954	50.7848	89.3486	52.8098	51.118	-1.18955	6.04166e-20	8.81883e-19		Placenta specificprotein 8 protein (C15 protein);note=predicted by EVM2;note=pfam_scan%3BPfam:PF04749.12%3B%3BE()%3D5.1E-17%3Bscore%3D62.2%3Bqu ery 17-102%3Bdescription%3DPLAC8;note=iprscan%3BInterPro:IPR006461 : Protein of unknown function Cys-rich%3BPfam:PF04749%3B%3Bscore%3D8.4E-13%3Bquery 17-102%3Bdescription%3DProtein of unknown function Cys-rich;Smp_101970	Putative placenta-specificprotein 8 protein (C15 protein) (Onzin) [Source:UniProtKB/TrEMBL;Acc:G4VTB5]	_	_
SmVG_032735:Smp_039160	14.1587	10.1034	10.0015	11.2216	5.2409	3.79197	5.47442	4.16284	-1.28466	5e-05	0.000181778	13.6294	20.3166	15.0307	15.1116	4.66522	6.29544	3.31683	4.7661	-0.966536	2.50278e-13	3.07139e-12	8.67297	12.3732	8.989	9.04829	2.43126	3.73126	1.90295	2.66996	-1.34496	7.96625e-18	9.89278e-17		hypothetical protein;Smp_039160	Putative uncharacterized protein [Source:UniProtKB/TrEMBL;Acc:G4M0J5]	_	_
SmVG_032735:Smp_143420	14.1587	10.1034	10.0015	11.2216	5.2409	3.79197	5.47442	4.16284	-1.28466	5e-05	0.000181778	13.6294	20.3166	15.0307	15.1116	4.66522	6.29544	3.31683	4.7661	-0.966536	2.50278e-13	3.07139e-12	8.67297	12.3732	8.989	9.04829	2.43126	3.73126	1.90295	2.66996	-1.34496	7.96625e-18	9.89278e-17		hypothetical protein;Smp_143420	Actin bundling/missing in metastasis-related [Source:UniProtKB/TrEMBL;Acc:G4M0J7]	_	_
SmVG_032735:Smp_189450	14.1587	10.1034	10.0015	11.2216	5.2409	3.79197	5.47442	4.16284	-1.28466	5e-05	0.000181778	13.6294	20.3166	15.0307	15.1116	4.66522	6.29544	3.31683	4.7661	-0.966536	2.50278e-13	3.07139e-12	8.67297	12.3732	8.989	9.04829	2.43126	3.73126	1.90295	2.66996	-1.34496	7.96625e-18	9.89278e-17		histidine kinase DhkL;note=predicted by EVM2;Smp_189450	Histidine kinase DhkL-like [Source:UniProtKB/TrEMBL;Acc:G4M0J6]	_	_
SmVG_008860:Smp_134620	18.4599	17.9694	17.3505	21.8152	6.58683	8.05384	9.629	6.78615	-1.28343	5e-05	0.000181778	19.4146	22.0552	20.8799	23.5514	4.63631	8.8187	5.457	5.92908	-1.00387	2.58652e-21	6.38648e-20	12.0076	13.1146	12.261	13.79	2.34907	4.99326	3.03366	3.23288	-1.39432	4.21008e-23	7.5072e-22		monocarboxylate transporter;Smp_134620	Putative monocarboxylate transporter [Source:UniProtKB/TrEMBL;Acc:G4VCC5]	_	_
SmVG_008860:Smp_169100	18.4599	17.9694	17.3505	21.8152	6.58683	8.05384	9.629	6.78615	-1.28343	5e-05	0.000181778	19.4146	22.0552	20.8799	23.5514	4.63631	8.8187	5.457	5.92908	-1.00387	2.58652e-21	6.38648e-20	12.0076	13.1146	12.261	13.79	2.34907	4.99326	3.03366	3.23288	-1.39432	4.21008e-23	7.5072e-22		monocarboxylate transporter;note=tmhmm%3B%3Bquery 1-113%3B;note=%3Bquery 1-34%3B;note=%3Bquery 95-113%3B;note=%3Bquery 35-57%3B;note=%3Bquery 72-94%3B;note=%3Bquery 58-71%3B;Smp_169100	Putative uncharacterized protein [Source:UniProtKB/TrEMBL;Acc:G4VCC6]	_	_
Smp_201060	242.432	259.589	198.688	241.546	99.642	113.612	80.39	93.7869	-1.28218	5e-05	0.000181778	463.898	454.86	402.336	431.505	123.851	133.072	147.918	165.436	-0.855856	1.42421e-21	3.5885e-20	296.558	277.733	243.436	259.994	64.3852	78.0627	83.9804	93.8391	-1.1996	3.69084e-21	5.80518e-20	GO:0003774,GO:0005737,GO:0005856,GO:0005874,GO:0005875,GO:0007017,GO:0030286	dynein light chain;note=iprscan%3BInterPro:IPR001372 : Dynein light chain%2C type 1%3BPfam:PF01221%3B%3Bscore%3D8.2E-68%3Bquery 1-89%3Bdescription%3DDynein light chain%2C type 1/2;note=iprscan%3BInterPro:IPR001372 : Dynein light chain%2C type 1%3BSuperfamily:SSF54648%3B%3Bscore%3D2.0E-37%3Bquery 1-89%3Bdescription%3DDynein light chain%2C type 1/2;Smp_201060
Smp_133580	10.1556	8.99137	8.59298	11.5218	3.98605	3.85167	4.49764	3.8128	-1.28176	5e-05	0.000181778	9.44891	11.5243	10.2864	12.2366	3.06444	4.44818	3.10119	3.81005	-0.845238	1.98381e-15	2.96633e-14	5.78652	6.71837	5.9622	6.99763	1.48409	2.49949	1.62611	1.96979	-1.19708	1.46676e-15	1.52405e-14		hypothetical protein;Smp_133580	Putative uncharacterized protein [Source:UniProtKB/TrEMBL;Acc:G4VDL5]	_	_
Smp_179490	31.8713	29.0542	22.3538	27.4989	11.7487	9.58814	15.1284	9.10744	-1.28143	5e-05	0.000181778	39.5185	46.1682	36.016	37.9992	12.4667	19.0679	9.68116	11.3479	-0.87885	1.91847e-10	1.73295e-09	24.578	27.5665	21.2352	22.106	6.31758	10.9524	5.29112	6.20233	-1.19551	1.53947e-14	1.46227e-13	GO:0005254,GO:0005887,GO:0016020,GO:0016021,GO:0034707,GO:1902476	hypothetical protein;Smp_179490	Bestrophin-related [Source:UniProtKB/TrEMBL;Acc:G4LYC4]	_	_
Smp_142050	16.6863	17.1845	13.4747	14.9406	6.39583	6.18918	7.23321	5.82761	-1.28019	5e-05	0.000181778	20.0878	20.7145	17.2893	17.3338	5.38111	7.51912	4.7827	6.00422	-0.908636	6.62593e-28	2.46641e-26	12.2812	12.2879	10.1743	10.0038	2.65528	4.34006	2.59162	3.32088	-1.25104	7.58211e-29	1.98439e-27	GO:0000165,GO:0000166,GO:0004672,GO:0004674,GO:0004707,GO:0005524,GO:0005622,GO:0006468,GO:0016301,GO:0016310,GO:0016740,GO:0016772	Serine/Threonine Kinase%2C CMGC Group%2C MAPK family%2C ERK subfamily;Smp_142050	Extracellular signal-regulated kinase 1/2,putative [Source:UniProtKB/TrEMBL;Acc:G4M1B1]	gi|158138507|ref|NP_001103361.1|	mitogen-activated protein kinase 3 isoform 3 [Homo sapiens]
Smp_035140	5.57093	5.35501	4.35232	6.06198	2.52241	1.3662	2.42706	2.47818	-1.27901	5e-05	0.000181778	5.39345	5.95523	5.0391	6.25199	1.75026	2.20694	0.952362	2.30583	-0.931906	2.01687e-07	1.19127e-06	3.3519	3.53501	3.02186	3.65438	0.909861	1.25994	0.536589	1.29368	-1.2413	5.13753e-10	3.04994e-09	GO:0005216,GO:0005515,GO:0006810,GO:0006811,GO:0016020,GO:0016021,GO:0034220,GO:0055085	transient receptor potential cation channel;Smp_035140	Putative transient receptor potential cation channel,subfamily m, member [Source:UniProtKB/TrEMBL;Acc:G4V813]	_	_
SmVG_025646	6.32661	6.26495	5.96387	5.08034	1.14632	2.75169	1.6804	4.17196	-1.27744	5e-05	0.000181778	13.6651	13.0921	14.2113	10.1058	1.43129	3.22125	3.28147	4.87428	-1.18172	6.09403e-08	3.93113e-07	11.4469	9.65969	9.85719	7.47118	0.673866	1.95114	2.31628	3.29904	-1.72067	2.26424e-09	1.24381e-08
SmVG_011546:Smp_018670	23.7651	23.2981	20.2504	20.8545	9.83462	8.86958	9.9424	7.76596	-1.27582	5e-05	0.000181778	26.2207	28.9155	25.1017	23.6514	7.23911	9.8503	6.39253	7.33892	-0.966024	3.30197e-32	1.57079e-30	15.9813	16.9224	14.5921	13.5697	3.57504	5.54704	3.40782	3.92289	-1.35219	1.3088e-34	4.65056e-33		tyrosine protein phosphatase non receptor type;Smp_018670	Putative 4.1 G protein [Source:UniProtKB/TrEMBL;Acc:G4VGL3]	gi|4506295|ref|NP_002821.1|	tyrosine-protein phosphatase non-receptor type 4 [Homo sapiens]
SmVG_011546:Smp_132370	23.7651	23.2981	20.2504	20.8545	9.83462	8.86958	9.9424	7.76596	-1.27582	5e-05	0.000181778	26.2207	28.9155	25.1017	23.6514	7.23911	9.8503	6.39253	7.33892	-0.966024	3.30197e-32	1.57079e-30	15.9813	16.9224	14.5921	13.5697	3.57504	5.54704	3.40782	3.92289	-1.35219	1.3088e-34	4.65056e-33		tyrosine protein phosphatase non receptor type%3B protein tyrosine phosphatase non receptor type;Smp_132370	Putative uncharacterized protein [Source:UniProtKB/TrEMBL;Acc:G4VGL4]	gi|223941882|ref|NP_001138841.1|	tyrosine-protein phosphatase non-receptor type 3 isoform 3 [Homo sapiens]
SmVG_011546:Smp_132390	23.7651	23.2981	20.2504	20.8545	9.83462	8.86958	9.9424	7.76596	-1.27582	5e-05	0.000181778	26.2207	28.9155	25.1017	23.6514	7.23911	9.8503	6.39253	7.33892	-0.966024	3.30197e-32	1.57079e-30	15.9813	16.9224	14.5921	13.5697	3.57504	5.54704	3.40782	3.92289	-1.35219	1.3088e-34	4.65056e-33		hypothetical protein;Smp_132390	Putative uncharacterized protein [Source:UniProtKB/TrEMBL;Acc:G4VGL5]	_	_
SmVG_024145:Smp_161070	7.11384	7.43174	6.03954	6.76801	2.56529	2.74518	3.16626	2.83557	-1.27381	5e-05	0.000181778	9.64805	10.2326	8.89413	9.32519	2.22476	3.90913	2.21076	2.96747	-0.977594	1.32435e-21	3.34371e-20	5.88322	6.12043	5.13133	5.32208	1.08747	2.24238	1.15162	1.58098	-1.34903	1.41407e-18	1.86803e-17		hypothetical protein;note=predicted by EVM2;Smp_161070	Putative uncharacterized protein [Source:UniProtKB/TrEMBL;Acc:G4VRT5]	_	_
SmVG_024145:Smp_174550	7.11384	7.43174	6.03954	6.76801	2.56529	2.74518	3.16626	2.83557	-1.27381	5e-05	0.000181778	9.64805	10.2326	8.89413	9.32519	2.22476	3.90913	2.21076	2.96747	-0.977594	1.32435e-21	3.34371e-20	5.88322	6.12043	5.13133	5.32208	1.08747	2.24238	1.15162	1.58098	-1.34903	1.41407e-18	1.86803e-17		hypothetical protein;Smp_174550	Putative uncharacterized protein [Source:UniProtKB/TrEMBL;Acc:G4VRT4]	_	_
Smp_197400	13.5203	18.5976	15.7547	14.4301	6.92275	8.54343	5.53062	4.79478	-1.27239	5e-05	0.000181778	23.1789	18.0215	21.7621	18.3881	5.38504	5.67949	7.08005	4.58211	-1.00409	5.36994e-11	5.17708e-10	14.1515	10.5498	12.5555	10.3764	2.64045	3.16337	3.68619	2.42555	-1.3947	1.29898e-11	9.31971e-11		hypothetical protein;Smp_197400	Putative uncharacterized protein [Source:UniProtKB/TrEMBL;Acc:G4VG86]	_	_
Smp_163380	3.89499	4.6171	5.00203	4.36109	1.18423	2.13273	2.1325	1.95982	-1.27056	5e-05	0.000181778	5.63831	5.06132	6.65523	5.06426	1.03959	2.20781	1.82337	1.89792	-0.932245	6.99134e-13	8.21166e-12	3.52762	2.98828	4.01781	3.02264	0.535337	1.29662	1.02723	1.07332	-1.24932	1.15772e-11	8.35549e-11	GO:0000166,GO:0004672,GO:0004674,GO:0005524,GO:0006468,GO:0016301,GO:0016310,GO:0016772	cyclin dependent kinase 2;Smp_163380	Serine/threonine kinase [Source:UniProtKB/TrEMBL;Acc:G4LZG2]	gi|4505569|ref|NP_003939.1|	cyclin-dependent kinase-like 2 [Homo sapiens]
Smp_151620	17.6516	14.8348	15.0011	14.2486	6.36177	6.69816	7.22113	5.31929	-1.26995	5e-05	0.000181778	16.0929	20.9155	17.6848	15.2193	3.7425	6.79	3.67107	4.08479	-1.1084	1.55087e-19	3.33478e-18	10.3726	12.6122	10.7425	9.13759	2.26856	4.14446	2.58286	2.68606	-1.35162	3.0514e-28	7.55941e-27	GO:0005509,GO:0005886,GO:0007155,GO:0007156,GO:0016020,GO:0016021	protocadherin 9;Smp_151620	Cadherin-related [Source:UniProtKB/TrEMBL;Acc:G4V5N0]	gi|165932370|ref|NP_078858.4|	protocadherin Fat 4 precursor [Homo sapiens]
SmVG_016632:Smp_042170	3.54083	2.8643	3.01749	3.26891	1.16986	1.10956	1.44906	1.54028	-1.26833	5e-05	0.000181778	3.96019	5.04111	4.67551	4.4664	1.04321	1.78971	1.29343	1.69394	-0.894719	1.55523e-18	3.06103e-17	2.51066	3.03066	2.7965	2.64221	0.565456	1.05351	0.686855	0.942402	-1.23173	4.2033e-19	5.77197e-18		deleted in lung and esophageal cancer protein 1;Smp_042170	Putative uncharacterized protein [Source:UniProtKB/TrEMBL;Acc:G4VJU1]	_	_
SmVG_016632:Smp_145030	3.54083	2.8643	3.01749	3.26891	1.16986	1.10956	1.44906	1.54028	-1.26833	5e-05	0.000181778	3.96019	5.04111	4.67551	4.4664	1.04321	1.78971	1.29343	1.69394	-0.894719	1.55523e-18	3.06103e-17	2.51066	3.03066	2.7965	2.64221	0.565456	1.05351	0.686855	0.942402	-1.23173	4.2033e-19	5.77197e-18		deleted in lung and esophageal cancer protein 1;Smp_145030	Putative uncharacterized protein [Source:UniProtKB/TrEMBL;Acc:G4VJU2]	gi|90669228|ref|NP_031363.2|	deleted in lung and esophageal cancer protein 1 isoform DLEC1-S3 [Homo sapiens]
Smp_062070	35.0814	31.0741	27.9104	34.9788	11.9742	15.1905	15.3922	11.0164	-1.26828	5e-05	0.000181778	46.2834	55.4171	45.2641	51.1783	12.2231	19.9363	15.416	13.5007	-0.93055	4.45992e-18	8.49316e-17	28.1145	32.431	26.1451	29.2612	5.98192	11.1467	8.1761	7.21438	-1.29925	3.81068e-23	6.82e-22	GO:0016491,GO:0055114	sulfide quinone reductase;Smp_062070	Sulfide quinone reductase, putative [Source:UniProtKB/TrEMBL;Acc:G4LZN7]	gi|10864011|ref|NP_067022.1|	sulfide:quinone oxidoreductase, mitochondrial precursor [Homo sapiens]
SmVG_025408:Smp_151960	7.42848	5.80817	5.77762	6.4219	2.08861	2.68843	3.21067	2.57859	-1.26741	5e-05	0.000181778	7.13933	10.1714	7.18214	7.48053	1.70207	3.12563	1.99668	2.54201	-0.97992	2.99333e-18	5.78978e-17	4.57755	6.28975	4.44256	4.46268	0.896628	1.84365	1.15208	1.46273	-1.37304	3.09829e-16	3.43174e-15		Rho GTPase activating protein 22;Smp_151960	Putative rho gtpase activating protein [Source:UniProtKB/TrEMBL;Acc:G4VRP1]	gi|7661882|ref|NP_055697.1|	rho GTPase-activating protein 25 isoform b [Homo sapiens]
SmVG_025408:Smp_151970	7.42848	5.80817	5.77762	6.4219	2.08861	2.68843	3.21067	2.57859	-1.26741	5e-05	0.000181778	7.13933	10.1714	7.18214	7.48053	1.70207	3.12563	1.99668	2.54201	-0.97992	2.99333e-18	5.78978e-17	4.57755	6.28975	4.44256	4.46268	0.896628	1.84365	1.15208	1.46273	-1.37304	3.09829e-16	3.43174e-15		Rho GTPase activating protein 22;Smp_151970	Putative uncharacterized protein [Source:UniProtKB/TrEMBL;Acc:G4VRP0]	_	_
SmVG_007996:Smp_148420	7.36183	6.73034	5.9269	7.53894	2.95624	2.90238	2.69653	2.89506	-1.2671	5e-05	0.000181778	7.76211	9.21472	7.64718	8.63285	2.19216	2.84468	2.1854	2.74716	-0.948389	1.57716e-27	5.63253e-26	4.81864	5.5005	4.51686	5.05056	1.10401	1.63435	1.19399	1.51076	-1.34172	6.40774e-28	1.55964e-26		coiled coil domain containing 88A;Smp_148420	Putative uncharacterized protein [Source:UniProtKB/TrEMBL;Acc:G4VC08]	gi|208022632|ref|NP_001129069.1|	girdin isoform 1 [Homo sapiens]
SmVG_007996:Smp_148430	7.36183	6.73034	5.9269	7.53894	2.95624	2.90238	2.69653	2.89506	-1.2671	5e-05	0.000181778	7.76211	9.21472	7.64718	8.63285	2.19216	2.84468	2.1854	2.74716	-0.948389	1.57716e-27	5.63253e-26	4.81864	5.5005	4.51686	5.05056	1.10401	1.63435	1.19399	1.51076	-1.34172	6.40774e-28	1.55964e-26		hook protein;Smp_148430	Putative uncharacterized protein [Source:UniProtKB/TrEMBL;Acc:G4VC09]	gi|50897852|ref|NP_060554.3|	girdin isoform 2 [Homo sapiens]
Smp_056990	119.077	102.084	81.0351	90.4808	45.2996	32.0632	57.2871	28.6496	-1.26582	5e-05	0.000181778	153.402	176.615	137.214	142.494	50.1479	86.1941	38.6395	45.6463	-0.793188	6.53473e-07	3.57683e-06	98.3382	108.251	83.5852	86.1687	26.5376	51.0999	22.3357	26.3218	-1.07722	1.8967e-09	1.05221e-08	GO:0004970,GO:0005234,GO:0016020,GO:0016021,GO:0035235	thyroid receptor interacting protein 11;Smp_056990	Putative uncharacterized protein [Source:UniProtKB/TrEMBL;Acc:G4V5I7]	_	_
Smp_145140	17.4782	15.2537	15.1472	18.0404	7.50502	5.56096	8.21261	6.20703	-1.26203	5e-05	0.000181778	19.0927	23.7895	21.2909	22.2463	6.26272	8.69307	4.51774	6.45424	-0.963402	1.625e-17	2.91435e-16	12.1812	14.4504	12.7389	13.2672	3.25463	5.09346	2.58986	3.67443	-1.33396	1.90684e-21	3.07368e-20	GO:0005102,GO:0005109,GO:0005576,GO:0005578,GO:0005615,GO:0007275,GO:0016020,GO:0016021,GO:0016055,GO:0030182,GO:0045165	wnt5%3B wingless type mmtv integration site family;note=pfam_scan%3BPfam:PF00110.14%3B%3BE()%3D9.3E-103%3Bscore%3D343.5%3B query 91-403%3Bdescription%3Dwnt;note=iprscan%3BInterPro:IPR005817 : Wnt superfamily%3BSMART:SM00097%3B%3Bscore%3D3.9E-127%3Bquery 93-403%3Bdescription%3DWnt superfamily;note=iprscan%3BInterPro:IPR005817 : Wnt superfamily%3BPfam:PF00110%3B%3Bscore%3D2.3E-128%3Bquery 90-403%3B…	Protein Wnt [Source:UniProtKB/TrEMBL;Acc:G4VJE5]	gi|13518021|ref|NP_078613.1|	protein Wnt-2b isoform WNT-2B2 [Homo sapiens]
SmVG_024781:Smp_043390	10.9407	13.2141	11.667	14.0159	4.24395	6.2466	4.72589	5.57319	-1.26137	5e-05	0.000181778	16.3553	14.9248	16.5641	17.7295	3.69738	5.42279	5.11254	6.06281	-0.92898	1.56338e-29	6.37828e-28	10.0307	8.80541	9.63287	10.2455	1.82788	3.06343	2.74704	3.27545	-1.30558	4.19713e-27	9.68324e-26		beta D xylosidase 2;Smp_043390	Putative uncharacterized protein [Source:UniProtKB/TrEMBL;Acc:G4VRX3]	_	_
SmVG_024781:Smp_145550	10.9407	13.2141	11.667	14.0159	4.24395	6.2466	4.72589	5.57319	-1.26137	5e-05	0.000181778	16.3553	14.9248	16.5641	17.7295	3.69738	5.42279	5.11254	6.06281	-0.92898	1.56338e-29	6.37828e-28	10.0307	8.80541	9.63287	10.2455	1.82788	3.06343	2.74704	3.27545	-1.30558	4.19713e-27	9.68324e-26		sister chromatid cohesion protein dcc1;Smp_145550	Dcc1-related [Source:UniProtKB/TrEMBL;Acc:G4VRX4]	_	_
SmVG_024781:Smp_145560	10.9407	13.2141	11.667	14.0159	4.24395	6.2466	4.72589	5.57319	-1.26137	5e-05	0.000181778	16.3553	14.9248	16.5641	17.7295	3.69738	5.42279	5.11254	6.06281	-0.92898	1.56338e-29	6.37828e-28	10.0307	8.80541	9.63287	10.2455	1.82788	3.06343	2.74704	3.27545	-1.30558	4.19713e-27	9.68324e-26		oxalate:formate antiporter;Smp_145560	Putative oxalate:formate antiporter [Source:UniProtKB/TrEMBL;Acc:G4VRX1]	_	_
Smp_080650	3.23154	3.51199	2.4211	2.9517	1.32667	1.00632	1.02236	1.70193	-1.26052	0.0005	0.00152459	3.49289	3.74802	3.18424	2.99759	1.03644	1.18553	0.733743	1.85991	-0.787357	0.000337522	0.00111544	2.21931	2.27336	1.94958	1.77987	0.533675	0.691241	0.407247	1.04272	-1.08211	2.53867e-05	7.78226e-05		camp dependent protein kinase regulatory chain;Smp_080650	Putative uncharacterized protein [Source:UniProtKB/TrEMBL;Acc:G4LZQ5]	_	_
Smp_042910	133.892	181.084	138.91	152.854	57.2713	71.4456	65.6813	59.0086	-1.25962	5e-05	0.000181778	196.372	152.704	160.903	161.825	40.156	63.0258	50.4151	52.0796	-0.918172	3.28466e-24	9.59011e-23	121.325	89.8943	94.3419	93.8022	20.527	36.0925	28.1532	28.7715	-1.29673	2.96016e-25	6.15815e-24	GO:0016020,GO:0016021	hypothetical protein;Smp_042910	Putative uncharacterized protein [Source:UniProtKB/TrEMBL;Acc:G4LX15]	_	_
Smp_141480	2.82768	4.02253	2.68092	1.9411	2.3313	0	1.54361	0.929344	-1.25576	0.00365	0.00907699	4.62291	4.86757	3.57	1.9401	1.3669	1.58098	0.143483	0.69818	-1.27504	0.0120684	0.0268549	3.0229	3.05207	2.21351	1.19988	0.728416	1.01155	0.0849627	0.405099	-1.4765	0.00069404	0.0016493		hypothetical protein;Smp_141480	Putative uncharacterized protein [Source:UniProtKB/TrEMBL;Acc:G4V7J2]	_	_
Smp_129610	2.89677	3.18195	3.07252	2.83809	1.59705	1.21949	0.890433	1.31493	-1.25545	5e-05	0.000181778	4.77588	5.29459	5.18499	5.31631	1.66946	1.67382	1.74075	1.67028	-0.840967	4.9696e-08	3.25347e-07	2.95464	3.20329	3.19622	3.16489	0.826745	0.971039	1.00292	0.942843	-1.2161	4.23965e-12	3.18743e-11	GO:0008152,GO:0016491,GO:0055114	malate dehydrogenase;Smp_129610	Putative malate dehydrogenase [Source:UniProtKB/TrEMBL;Acc:G4V698]	_	_
Smp_159740	25.0951	22.1523	20.1754	20.443	10.1923	8.44134	11.4134	6.82762	-1.25267	5e-05	0.000181778	26.5398	32.5003	26.2747	25.0996	7.35734	11.9822	6.22962	6.55051	-1.00245	1.12293e-12	1.28944e-11	16.4292	19.2778	15.3825	14.5299	3.62326	6.76731	3.3181	3.52695	-1.38243	1.49834e-17	1.82348e-16	GO:0005789,GO:0005887,GO:0008521,GO:0015295,GO:0015876,GO:0015992,GO:0016020,GO:0016021	solute carrier family 33;Smp_159740	Putative solute carrier family 33 (Acetyl-CoA transporter) [Source:UniProtKB/TrEMBL;Acc:G4V7N5]	gi|300360496|ref|NP_001177921.1|	acetyl-coenzyme A transporter 1 [Homo sapiens]
Smp_141690	1.93986	2.31038	1.84717	1.9593	0.551113	0.778312	1.0915	0.965031	-1.25062	5e-05	0.000181778	3.19433	2.95849	2.69133	2.9415	0.482436	1.20531	0.638289	1.37596	-0.971472	3.29919e-07	1.89507e-06	2.01881	1.77526	1.60864	1.72797	0.256206	0.714934	0.355673	0.774912	-1.23868	5.9345e-08	2.74611e-07		hypothetical protein;Smp_141690	Putative uncharacterized protein [Source:UniProtKB/TrEMBL;Acc:G4V6F2]	_	_
Smp_033200	5.01894	4.69056	4.49005	4.44099	2.60338	1.80102	1.82316	1.6119	-1.24962	5e-05	0.000181778	4.86707	5.41438	5.15798	4.41613	1.74279	1.66855	1.14746	1.42883	-0.939319	1.41187e-11	1.44425e-10	3.19224	3.46535	3.13663	2.76436	0.916242	1.01361	0.686608	0.848665	-1.30747	4.12959e-14	3.72965e-13	GO:0016020,GO:0016021	hypothetical protein;note=predicted by EVM2;note=tmhmm%3B%3Bquery 1-269%3B;note=%3Bquery 224-269%3B;note=%3Bquery 205-223%3B;note=%3Bquery 1-204%3B;Smp_033200
Smp_007210	14.7873	8.91037	7.09976	9.47918	4.92188	2.12415	7.09059	2.83282	-1.247	5e-05	0.000181778	10.7794	18.7181	9.7352	11.859	4.12654	7.44355	1.98216	3.14964	-0.937599	0.00131533	0.00380249	6.55078	10.9099	5.63641	6.81078	2.01091	4.15597	1.07897	1.68801	-1.22853	6.39231e-05	0.000182455	GO:0005096,GO:0005097,GO:0005622,GO:0006886,GO:0012505,GO:0017137,GO:0031338,GO:0032313,GO:0032851,GO:0090630	rab GTPase activating protein 1;Smp_007210	Putative rab6 gtpase activating protein, gapcena (Rabgap1 protein) [Source:UniProtKB/TrEMBL;Acc:G4VB12]	gi|164519084|ref|NP_036329.3|	rab GTPase-activating protein 1 [Homo sapiens]
Smp_149400	3.14545	3.59361	2.66827	2.1884	1.31087	1.81181	1.32397	0.438952	-1.24699	5e-05	0.000181778	4.43046	4.20024	3.51251	2.92853	1.01077	1.45919	1.44693	0.780414	-0.911933	3.22448e-06	1.58156e-05	2.65463	2.40933	1.99272	1.64897	0.491702	0.806356	0.76009	0.396305	-1.27212	2.80147e-07	1.17565e-06	GO:0004252,GO:0006508,GO:0008233,GO:0008236,GO:0016485,GO:0016787	subfamily S8B unassigned peptidase (S08 family);Smp_149400	Putative pc3-like endoprotease variant B [Source:UniProtKB/TrEMBL;Acc:G4VKQ9]	gi|20336242|ref|NP_000430.3|	neuroendocrine convertase 1 isoform 1 preproprotein [Homo sapiens]
Smp_140170	8.82966	7.48725	6.54812	8.09912	2.88365	3.4006	4.02422	2.74363	-1.24632	5e-05	0.000181778	8.42338	10.5263	7.84124	8.65083	2.09211	4.02603	2.31612	2.57554	-0.931149	3.70282e-14	4.88463e-13	5.35264	6.50103	4.75654	5.15509	1.06047	2.31799	1.30758	1.4325	-1.30462	9.83373e-14	8.66436e-13	GO:0005515,GO:0016020,GO:0016021	irregular chiasm C roughest protein;Smp_140170	Nephrin related [Source:UniProtKB/TrEMBL;Acc:G4M0V8]	_	_
SmVG_031568:Smp_005360	15.3793	11.4926	10.2487	13.4555	7.14935	3.63593	5.95316	4.58508	-1.24601	5e-05	0.000181778	16.4593	22.0066	16.0726	18.2845	6.41634	7.56235	3.88389	5.79812	-0.884571	3.63046e-09	2.77143e-08	9.8684	12.7843	9.40565	10.4389	3.1465	4.23781	2.11888	3.11168	-1.21764	1.23366e-13	1.07818e-12		hypothetical protein;note=predicted by EVM2;Smp_005360	Putative uncharacterized protein [Source:UniProtKB/TrEMBL;Acc:G4LZK3]	_	_
SmVG_031568:Smp_124970	15.3793	11.4926	10.2487	13.4555	7.14935	3.63593	5.95316	4.58508	-1.24601	5e-05	0.000181778	16.4593	22.0066	16.0726	18.2845	6.41634	7.56235	3.88389	5.79812	-0.884571	3.63046e-09	2.77143e-08	9.8684	12.7843	9.40565	10.4389	3.1465	4.23781	2.11888	3.11168	-1.21764	1.23366e-13	1.07818e-12		Phosphatidylinositol 4 phosphate 5 kinase type 1;Smp_124970	Phosphatidylinositol-4-phosphate 5-kinase type I, putative [Source:UniProtKB/TrEMBL;Acc:G4LZK4]	gi|31317309|ref|NP_036530.1|	phosphatidylinositol-4-phosphate 5-kinase type-1 gamma isoform 2 [Homo sapiens]
Smp_169660	12.0242	9.46754	10.0149	10.6115	4.433	3.76684	4.99941	4.56101	-1.24579	5e-05	0.000181778	12.5472	17.0418	14.4507	13.5718	4.03407	5.74033	3.26746	4.97081	-0.917047	2.41535e-22	6.34531e-21	7.76123	10.1323	8.49943	7.91554	2.03147	3.28183	1.78811	2.73142	-1.27857	2.70871e-22	4.59443e-21		hypothetical protein;Smp_169660	Putative uncharacterized protein [Source:UniProtKB/TrEMBL;Acc:G4VJG0]	_	_
Smp_157670	85.8453	84.8697	85.6749	96.5228	39.4801	36.3868	34.9651	38.0121	-1.24551	5e-05	0.000181778	91.4373	100.215	102.281	104.63	27.7849	33.2442	25.769	34.1244	-0.934718	2.48294e-48	2.33529e-46	57.7291	60.7874	61.2807	62.2468	14.2107	19.2656	14.3975	18.9968	-1.32607	2.61272e-46	1.47037e-44		hypothetical protein;Smp_157670	Putative uncharacterized protein [Source:UniProtKB/TrEMBL;Acc:G4VPB3]	_	_
Smp_197860	56.528	55.2624	47.8724	52.1561	19.2434	22.546	28.1481	19.4182	-1.2452	5e-05	0.000181778	91.7961	104.233	89.0928	89.7776	20.6645	40.1001	22.8127	25.9677	-1.00233	3.18399e-20	7.26481e-19	56.8935	61.9893	52.5935	52.4009	10.3131	22.8376	12.3879	14.081	-1.39267	4.19377e-24	8.18247e-23	GO:0003779	gelsolin;Smp_197860	Putative gelsolin [Source:UniProtKB/TrEMBL;Acc:G4VIJ2]	_	_
Smp_031220	14.0952	11.47	12.6194	10.3429	5.42215	4.72778	6.49903	3.834	-1.24438	5e-05	0.000181778	12.4321	16.8265	14.8116	11.921	3.82046	6.39171	3.08623	3.70076	-0.953139	7.27905e-12	7.6983e-11	7.9997	10.3541	8.97236	7.27727	2.11131	3.82063	1.76006	2.17759	-1.29334	5.35975e-12	3.99658e-11	GO:0006810,GO:0016020,GO:0016021	solute carrier family 35 member F1;Smp_031220	Solute carrier family 35-related [Source:UniProtKB/TrEMBL;Acc:G4VPL7]	gi|189027121|ref|NP_001025029.2|	solute carrier family 35 member F1 [Homo sapiens]
Smp_094980	6.13651	4.52397	2.32611	4.07516	0.454233	1.38482	3.90544	1.4608	-1.24364	0.0088	0.0197308	20.3541	28.4556	18.1288	19.0334	4.42696	13.032	5.86533	6.39654	-0.827312	4.98315e-05	0.000195492	15.1034	19.5485	13.2349	14.6466	2.74928	8.35402	3.34757	3.86184	-1.16425	1.55577e-06	5.79679e-06		transmembrane and TPR repeat containing protein;Smp_094980	Putative smile protein [Source:UniProtKB/TrEMBL;Acc:G4VRY4]	gi|224809432|ref|NP_861448.2|	transmembrane and TPR repeat-containing protein 3 [Homo sapiens]
Smp_156340	17.6298	16.2445	14.3314	17.1455	6.05879	7.35573	7.74857	6.43701	-1.24354	5e-05	0.000181778	17.513	20.2018	17.6463	17.9173	4.7576	7.44269	5.27128	6.40553	-0.864461	4.61006e-16	7.2082e-15	10.7487	11.9381	10.3834	10.3728	2.31693	4.1913	2.88905	3.4631	-1.2159	2.60219e-19	3.65057e-18	GO:0005506,GO:0009055,GO:0016020,GO:0016021,GO:0016705,GO:0020037,GO:0055114	hypothetical protein;Smp_156340	Putative uncharacterized protein [Source:UniProtKB/TrEMBL;Acc:G4VF77]	_	_
Smp_031180	4.30546	4.38697	1.32346	2.91295	1.4703	0.905158	1.73182	1.37016	-1.23902	5e-05	0.000181778	7.59681	8.92454	2.70995	5.22168	2.09292	2.63283	1.22449	1.9417	-0.796262	0.0105481	0.023877	4.68888	5.26043	1.5789	2.99626	1.01709	1.47509	0.646553	1.04367	-1.23184	0.000565297	0.00136941	GO:0006629,GO:0008374,GO:0016740,GO:0016746	phospholipase A;Smp_031180	Phosphatidylcholine-sterol acyltransferase (Lecithin-cholesterol acyltransferase)/ Phospholipase A [Source:UniProtKB/TrEMBL;Acc:G4VPL2]	gi|6912484|ref|NP_036452.1|	group XV phospholipase A2 precursor [Homo sapiens]
Smp_177000	5.71655	4.65596	4.60318	4.90609	2.4533	1.86506	1.97298	2.14255	-1.23718	5e-05	0.000181778	4.88225	6.54356	5.47748	5.32316	1.72517	1.84712	1.30544	1.95337	-0.925761	2.15533e-24	6.38362e-23	3.07289	3.951	3.26403	3.13356	0.893354	1.08464	0.747326	1.08401	-1.28511	1.06924e-21	1.74083e-20	GO:0016020,GO:0016021	transmembrane protein 132E;Smp_177000	Putative uncharacterized protein [Source:UniProtKB/TrEMBL;Acc:G4VG62]	_	_
Smp_147460	51.4508	53.8051	41.6334	46.4189	19.3146	17.8246	25.7169	19.2491	-1.23536	5e-05	0.000181778	73.8589	74.7487	63.3515	65.4925	18.1223	29.9045	16.0975	22.5062	-0.922372	9.09629e-20	1.98715e-18	45.1601	43.6779	36.5405	37.6681	9.01357	16.857	8.72043	12.176	-1.28605	1.51554e-23	2.82128e-22	GO:0016787,GO:0017040	ceramidase;Smp_147460	Ceramidase [Source:UniProtKB/TrEMBL;Acc:G4VN86]	gi|221218981|ref|NP_063946.2|	neutral ceramidase isoform a [Homo sapiens]
Smp_140610	133.294	184.752	137.839	153.604	54.0747	79.9698	60.0344	64.9766	-1.23434	5e-05	0.000181778	327.958	275.943	268.367	288.125	64.8997	90.0092	85.762	88.4537	-0.996905	1.52967e-31	7.03249e-30	198.945	160.038	154.775	164.184	31.9925	50.4666	45.8205	47.4344	-1.40673	3.83303e-30	1.07237e-28	GO:0003993,GO:0016311,GO:0016787,GO:0046872	iron:zinc purple acid phosphatase protein;Smp_140610	Acid phosphatase-related [Source:UniProtKB/TrEMBL;Acc:C4Q6M8]	gi|228008321|ref|NP_001004318.2|	iron/zinc purple acid phosphatase-like protein precursor [Homo sapiens]
Smp_189490	8.3485	6.83135	7.15188	6.85835	3.27747	2.56559	3.84657	2.74383	-1.23125	5e-05	0.000181778	6.66527	8.52234	7.79717	6.67023	2.10316	3.50059	1.78994	2.32633	-0.881708	2.52469e-15	3.70317e-14	4.90229	5.67315	5.38875	4.68479	1.38661	2.31311	1.34433	1.68886	-1.09446	1.31228e-20	2.01203e-19	GO:0004860,GO:0005515,GO:0005737,GO:0006469,GO:0016020,GO:0016021,GO:0019221,GO:0046426	matrix remodeling associated protein 5;Smp_189490	_	gi|38490688|ref|NP_849144.2|	immunoglobulin superfamily member 10 isoform 1 precursor [Homo sapiens]
Smp_124070	8.11868	8.39641	7.41969	9.38467	2.4415	5.14146	3.75701	2.85496	-1.23099	5e-05	0.000181778	18.5703	17.1611	18.0452	17.2799	4.52657	6.00892	6.27959	5.96511	-0.848555	5.74717e-08	3.72297e-07	11.905	10.4956	10.9117	10.36	2.36809	3.70286	3.61096	3.40842	-1.19496	1.11793e-10	7.13717e-10	GO:0005576	venom allergen (val) protein;Smp_124070	Venom allergen-like (VAL) 16 protein [Source:UniProtKB/TrEMBL;Acc:G4V6M9]	gi|11641247|ref|NP_071738.1|	Golgi-associated plant pathogenesis-related protein 1 [Homo sapiens]
Smp_154140	14.5574	12.774	11.3034	12.8149	5.3675	4.7405	6.77469	5.0529	-1.22989	5e-05	0.000181778	19.5162	22.9946	19.2338	20.4163	5.74424	9.63948	5.68084	7.84699	-0.805272	6.7667e-21	1.62519e-19	11.9749	13.6567	11.3026	11.8827	2.89691	5.5444	3.13414	4.31587	-1.09067	1.59673e-20	2.43664e-19	GO:0004252,GO:0006508,GO:0016787	membrane bound transcription factor site 1;Smp_154140	Site-1 peptidase (S08 family) [Source:UniProtKB/TrEMBL;Acc:G4VKD8]	gi|4506775|ref|NP_003782.1|	membrane-bound transcription factor site-1 protease preproprotein [Homo sapiens]
Smp_044060	8.51993	7.71915	6.52844	7.94216	3.40958	3.65914	2.72005	3.30485	-1.22983	5e-05	0.000181778	9.36435	11.6876	8.84425	9.49783	2.76413	3.07223	2.74669	3.23777	-0.937987	1.90855e-24	5.69378e-23	5.88466	7.1387	5.37738	5.5962	1.43331	1.77554	1.52556	1.80806	-1.32827	2.53909e-21	4.06588e-20	GO:0003824,GO:0004114,GO:0007165,GO:0008081,GO:0008152,GO:0016787,GO:0046872	high affinity cAMP specific and IBMX insensitive;Smp_044060	Putative camp-specific cyclic nucleotide phosphodiesterase [Source:UniProtKB/TrEMBL;Acc:G4VD32]	gi|27734721|ref|NP_002596.1|	high affinity cAMP-specific and IBMX-insensitive 3',5'-cyclic phosphodiesterase 8A isoform 1 [Homo sapiens]
SmVG_028693	125.676	74.6789	53.0963	95.0402	37.7636	21.7905	55.9904	33.2826	-1.22749	5e-05	0.000181778	63.8537	107.437	46.2985	68.4885	25.8757	40.597	12.0982	22.4222	-0.768492	0.00587973	0.0144024	79.5928	123.05	56.6967	90.9871	22.3177	48.4465	12.2714	23.1746	-1.16186	0.000158101	0.000421603
Smp_072450	10.9447	11.3158	9.87006	12.0369	4.46795	4.63098	4.80106	4.98845	-1.22548	5e-05	0.000181778	11.3409	12.1098	11.1251	11.7209	2.90096	4.34402	3.04808	4.14358	-0.90986	2.23761e-13	2.76526e-12	7.13107	7.28504	6.6246	6.96163	1.50078	2.54489	1.72577	2.34366	-1.27266	1.98623e-18	2.59222e-17	GO:0004930,GO:0007186,GO:0016020,GO:0016021	rhodopsin orphan GPCR;Smp_072450	Putative rhodopsin-like orphan GPCR [Source:UniProtKB/TrEMBL;Acc:G4VA47]	_	_
Smp_125020	10.8577	11.3961	10.18	9.83089	3.57128	5.37507	5.19818	3.95163	-1.22377	5e-05	0.000181778	31.3526	40.2347	33.1749	33.0534	12.1893	14.9398	10.949	13.8111	-0.689449	5.87247e-09	4.36994e-08	20.3726	25.1757	20.8004	20.3262	6.49901	8.99147	6.56771	8.12707	-0.954041	8.80852e-11	5.69454e-10	GO:0005875,GO:0007017,GO:0030286	dynein light chain;Smp_125020
Smp_061050	2.94137	2.54396	2.77514	2.54489	0.759723	1.19996	1.05236	1.61497	-1.22359	0.002	0.00530831	3.14554	3.59939	3.53969	3.00196	0.828978	1.07595	1.07008	1.45219	-0.8509	8.96514e-11	8.43846e-10	2.05759	2.18349	2.19377	1.83961	0.417657	0.674979	0.632159	0.835899	-1.18224	3.95704e-13	3.28999e-12		coiled coil domain containing protein 13;Smp_061050	Putative dna double-strand break repair rad50 ATPase [Source:UniProtKB/TrEMBL;Acc:G4VSQ1]	gi|154090997|ref|NP_653320.3|	coiled-coil domain-containing protein 13 [Homo sapiens]
Smp_171680	3.08709	3.17929	3.45811	3.34886	1.1406	1.47964	1.50617	1.47686	-1.22229	5e-05	0.000181778	3.40569	3.50203	4.01744	3.52033	0.815648	1.44927	1.01324	1.36524	-0.89886	9.39478e-21	2.22175e-19	2.09218	2.06766	2.34264	2.02451	0.400177	0.81562	0.535775	0.729161	-1.25001	4.40844e-20	6.49328e-19	GO:0005515,GO:0016020,GO:0016021	protein sidekick;Smp_171680	Putative uncharacterized protein [Source:UniProtKB/TrEMBL;Acc:G4VP76]	_	_
Smp_150650	129.21	139.746	115.143	118.492	56.9965	52.7633	48.3273	57.3315	-1.22224	0.00025	0.000810166	127.248	127.263	117.686	110.222	34.5644	38.4596	31.446	45.1056	-0.885921	2.84213e-24	8.31778e-23	87.0855	83.3127	75.8628	71.287	19.8567	24.2454	19.7631	27.8687	-1.25483	1.6053e-22	2.76134e-21	GO:0016020,GO:0016021	hypothetical protein;note=tmhmm%3B%3Bquery 1-78%3B;Smp_150650	Putative uncharacterized protein [Source:UniProtKB/TrEMBL;Acc:G4LXS5]	_	_
Smp_212010	6.40504	5.20495	3.25942	4.15208	1.98468	1.10881	2.50317	2.56269	-1.22111	5e-05	0.000181778	8.1363	11.7407	6.15702	8.57249	3.02571	3.49738	1.1016	3.10266	-0.951034	0.000538909	0.00170516	6.05642	8.14466	4.1597	5.61312	1.50644	2.26161	0.756889	2.02412	-1.3389	7.40219e-07	2.89778e-06	GO:0000139,GO:0005789,GO:0008203,GO:0015485,GO:0016020,GO:0016021,GO:0032933	sterol regulatory element binding protein;phosphopantothenate cysteine ligase;Smp_212010	Sterol response element binding protein cleavage-activating protein, putative [Source:UniProtKB/TrEMBL;Acc:G4M1J9]	gi|66932902|ref|NP_036367.2|	sterol regulatory element-binding protein cleavage-activating protein [Homo sapiens]
Smp_173100	10.2327	8.76282	8.58641	9.73242	3.95164	4.28374	3.52925	4.24267	-1.221	5e-05	0.000181778	8.72415	10.7838	9.41855	9.70818	2.60017	3.11479	2.78361	3.55427	-0.908619	1.75081e-29	7.11939e-28	5.32022	6.33024	5.44427	5.5375	1.28765	1.74745	1.45738	1.86765	-1.28325	1.85434e-29	4.98725e-28	GO:0005515,GO:0006950,GO:0009415,GO:0016020,GO:0016021	cell adhesion molecule;Smp_173100	Axon guidance protein [Source:UniProtKB/TrEMBL;Acc:G4VHL0]	_	_
Smp_153480	108.744	108.302	97.754	114.687	39.7706	45.5989	57.0244	41.994	-1.21987	5e-05	0.000181778	121.113	133.01	120.074	128.918	29.6434	56.1392	31.1356	38.2719	-0.947687	4.9482e-20	1.10247e-18	74.2597	78.1729	69.7745	74.2593	14.7399	31.6701	16.7341	20.5378	-1.31946	4.31508e-23	7.68037e-22	GO:0005215,GO:0006810,GO:0006811,GO:0006821,GO:0015379,GO:0016020,GO:0016021,GO:0022820,GO:0055085,GO:0071805,GO:1902476	solute carrier family 12;Smp_153480	Putative cation chloride cotransporter [Source:UniProtKB/TrEMBL;Acc:G4VNM7]	gi|31881740|ref|NP_064631.2|	solute carrier family 12 member 9 [Homo sapiens]
Smp_175330	10.6557	6.32688	4.61566	6.03526	3.13643	3.13872	2.96748	2.6456	-1.21688	5e-05	0.000181778	8.78842	14.1618	6.68996	7.81884	3.15716	3.5441	2.61085	3.12296	-0.798843	7.14889e-06	3.30885e-05	5.41345	8.57138	4.0655	4.63926	1.55541	1.9811	1.33248	1.69331	-1.21385	2.88368e-07	1.20703e-06		hypothetical protein;Smp_175330.2	Putative uncharacterized protein [Source:UniProtKB/TrEMBL;Acc:G4LZP9]	gi|24797145|ref|NP_722523.1|	sorting nexin-14 isoform a [Homo sapiens]
Smp_136620	76.6351	103.868	86.7455	65.0718	21.3392	38.0209	39.5596	44.0744	-1.21662	5e-05	0.000181778	84.7323	67.0379	77.6969	51.8971	12.8326	27.6855	20.4681	30.3228	-0.846233	4.03997e-07	2.29702e-06	53.2438	40.2125	45.7221	30.4426	6.92779	15.7094	11.1141	16.5706	-1.16855	8.10038e-08	3.68529e-07		hypothetical protein;Smp_136620	Putative uncharacterized protein [Source:UniProtKB/TrEMBL;Acc:C4Q4G9]	_	_
Smp_005790	32.601	29.7282	29.3941	28.0316	13.2896	11.6668	13.2426	13.4062	-1.21449	5e-05	0.000181778	32.5945	38.6828	35.3198	30.6691	9.93515	13.1822	8.47741	12.1924	-0.89478	9.40067e-44	7.72171e-42	19.8396	22.6609	20.207	17.5415	4.83229	7.31831	4.45599	6.43407	-1.26061	1.34187e-34	4.75072e-33	GO:0000166,GO:0001664,GO:0003924,GO:0004871,GO:0005525,GO:0006184,GO:0007165,GO:0007186,GO:0019001,GO:0031683,GO:0060158	guanine nucleotide binding protein (G protein);Smp_005790	Putative gtp-binding protein (Q) alpha-11 subunit, gna11 [Source:UniProtKB/TrEMBL;Acc:G4V734]	gi|5729850|ref|NP_006487.1|	guanine nucleotide-binding protein G(k) subunit alpha [Homo sapiens]
Smp_141660	13.4666	12.3721	11.8143	13.3806	6.24133	4.65477	6.2576	4.84069	-1.21431	5e-05	0.000181778	14.1503	16.4398	14.8324	14.8995	5.0843	6.65797	3.68148	4.63598	-0.859578	1.06293e-14	1.47648e-13	8.73541	9.74074	8.73114	8.64942	2.53155	3.78712	2.00074	2.51148	-1.18689	1.1315e-16	1.28845e-15	GO:0005245,GO:0005515,GO:0005891,GO:0007268,GO:0007528,GO:0008331,GO:0070588,GO:1901385	high voltage activated calcium channel beta;Smp_141660	Putative high voltage-activated calcium channel beta subunit 2 [Source:UniProtKB/TrEMBL;Acc:G4V6E8]	gi|40804470|ref|NP_954855.1|	voltage-dependent L-type calcium channel subunit beta-1 isoform 2 [Homo sapiens]
Smp_176950	2.91973	2.8601	2.46707	2.43512	1.63976	0.943575	1.10187	0.930273	-1.21063	0.0001	0.000349068	2.42664	2.68694	2.41693	2.22095	0.942399	0.915613	0.623558	0.672007	-0.868515	8.9633e-07	4.79743e-06	1.56772	1.66666	1.4964	1.34896	0.47808	0.545103	0.355976	0.376864	-1.23582	4.64756e-09	2.46856e-08		hypothetical protein;Smp_176950	Putative uncharacterized protein [Source:UniProtKB/TrEMBL;Acc:G4VAC7]	_	_
Smp_154700	1.62774	1.91176	1.08191	1.58285	0.606946	0.516401	0.982236	0.575266	-1.21057	0.0035	0.00876331	2.31396	2.46384	1.50478	1.79067	0.449516	1.13635	0.4787	0.615223	-0.857938	0.00322898	0.00847194	1.61622	1.72584	1.08034	1.16813	0.238246	0.761176	0.293157	0.439776	-1.1393	0.000192367	0.000505229		hypothetical protein;note=pfam_scan%3BPfam:PF08833.5%3B%3BE()%3D2.7E-5%3Bscore%3D23.6%3Bquer y 114-130%3Bdescription%3DAxin_b-cat_bind;Smp_154700	Putative uncharacterized protein [Source:UniProtKB/TrEMBL;Acc:G4V6H5]	_	_
Smp_150730	9.99212	10.6067	8.84289	9.83385	3.97807	3.80667	4.88575	4.33666	-1.20749	5e-05	0.000181778	11.0306	11.0203	10.2232	9.98825	2.88748	4.36487	2.62217	3.7362	-0.892572	2.39945e-31	1.09091e-29	6.82978	6.58362	6.08943	5.91301	1.42297	2.5049	1.47612	2.04652	-1.24143	1.31488e-30	3.74319e-29	GO:0004714,GO:0007155,GO:0016020,GO:0016021,GO:0016740,GO:0018108,GO:0070492	discoidin domain containing receptor 2;Smp_150730	Putative discoidin domain receptor [Source:UniProtKB/TrEMBL;Acc:G4V7C2]	gi|62420884|ref|NP_006173.2|	discoidin domain-containing receptor 2 precursor [Homo sapiens]
Smp_118040	2.28033	1.7388	2.06312	1.82944	0.957758	0.713538	0.846041	0.910596	-1.20665	0.0002	0.000662986	1.75985	2.58959	2.46492	1.97495	0.631807	0.946748	0.550314	0.754905	-0.849759	9.63182e-06	4.35659e-05	1.26105	1.65981	1.54968	1.14755	0.361113	0.560041	0.295303	0.44848	-1.2081	7.75257e-09	3.99995e-08	GO:0004930,GO:0004983,GO:0005887,GO:0007166,GO:0007186,GO:0007218,GO:0016020,GO:0016021	neuropeptide receptor;Smp_118040	Putative neuropeptide receptor [Source:UniProtKB/TrEMBL;Acc:G4V636]	gi|221316654|ref|NP_004876.2|	neuropeptide FF receptor 2 isoform 1 [Homo sapiens]
SmVG_024757:Smp_174340	8.13575	7.84185	6.20191	7.06352	2.44989	2.49936	4.06817	3.66285	-1.20551	5e-05	0.000181778	9.5385	10.3357	8.11619	8.38171	2.01599	4.18005	2.0634	3.76229	-0.893578	3.7648e-10	3.26662e-09	5.79193	5.9862	4.63384	4.77306	0.986357	2.32008	1.08854	2.00822	-1.22305	2.75633e-11	1.90189e-10		frizzled 9;note=predicted by EVM2;Smp_174340	Putative uncharacterized protein [Source:UniProtKB/TrEMBL;Acc:G4VRM2]	_	_
SmVG_024757:Smp_174350	8.13575	7.84185	6.20191	7.06352	2.44989	2.49936	4.06817	3.66285	-1.20551	5e-05	0.000181778	9.5385	10.3357	8.11619	8.38171	2.01599	4.18005	2.0634	3.76229	-0.893578	3.7648e-10	3.26662e-09	5.79193	5.9862	4.63384	4.77306	0.986357	2.32008	1.08854	2.00822	-1.22305	2.75633e-11	1.90189e-10		frizzled 4;Smp_174350
Smp_165530	4.59173	4.68484	4.22081	4.86626	2.40451	1.72266	2.33426	1.50137	-1.2055	5e-05	0.000181778	5.35656	5.86277	5.51182	5.70027	1.85313	2.45821	1.37062	1.57205	-0.890197	1.25996e-13	1.58894e-12	3.38047	3.51825	3.29519	3.35904	0.942681	1.42528	0.757286	0.851065	-1.23601	1.16466e-13	1.01971e-12	GO:0005622,GO:0007165	rho GTPase activating protein 20;Smp_165530	Putative uncharacterized protein [Source:UniProtKB/TrEMBL;Acc:C1LZZ3]	_	_
Smp_127810	35.7409	32.1728	35.1695	35.3786	15.4515	15.1004	15.7114	13.8618	-1.20345	5e-05	0.000181778	34.1867	45.1138	39.6813	38.1864	10.3079	14.04	7.70462	9.21287	-1.09771	1.60877e-19	3.44724e-18	22.2972	26.3722	25.2164	23.0785	5.71784	8.83317	5.90821	6.86032	-1.29866	2.22279e-40	1.00656e-38	GO:0005515,GO:0016020,GO:0016021	cell adhesion molecule:down regulated by;Smp_127810	Putative uncharacterized protein [Source:UniProtKB/TrEMBL;Acc:G4VMN7]	_	_
Smp_179360	51.2565	40.0215	36.6709	44.434	18.3139	14.9843	27.1386	14.58	-1.20033	5e-05	0.000181778	48.9392	66.2858	48.5219	54.3029	16.0313	29.274	13.2905	15.7779	-0.855264	1.2984e-07	7.96694e-07	29.5698	38.6284	27.7657	30.8967	7.80387	16.1473	7.04659	8.23396	-1.18159	1.46008e-10	9.19491e-10	GO:0005794,GO:0006810,GO:0016020,GO:0016021	sortilin;Smp_179360	Sortilin, putative [Source:UniProtKB/TrEMBL;Acc:G4LWE6]	gi|17149834|ref|NP_002950.3|	sortilin isoform 1 preproprotein [Homo sapiens]
Smp_148210	10.0677	6.42745	4.66955	7.19943	3.25358	2.74939	4.02582	2.31679	-1.20008	5e-05	0.000181778	5.72272	10.0718	4.77022	6.67138	2.02108	3.22648	1.68157	2.01965	-0.838284	2.84399e-05	0.000117037	3.82961	6.3637	3.02652	4.10267	1.12101	1.96839	0.950716	1.21423	-1.21177	1.02147e-06	3.92e-06	GO:0004871,GO:0004930,GO:0004993,GO:0007165,GO:0007186,GO:0007210,GO:0016020,GO:0016021	biogenic amine (5HT) receptor;Smp_148210	Putative biogenic amine (5HT) receptor [Source:UniProtKB/TrEMBL;Acc:G4VBX8]	gi|4504533|ref|NP_000854.1|	5-hydroxytryptamine receptor 1B [Homo sapiens]
Smp_018580	10.7848	9.01362	9.20661	10.6867	4.02436	4.62556	4.50453	4.13694	-1.19879	5e-05	0.000181778	10.6764	13.6742	12.0363	12.6752	3.21016	4.77536	3.73664	4.35377	-0.85793	3.7225e-18	7.12188e-17	6.51709	7.96914	6.98039	7.26911	1.59317	2.70499	1.99108	2.33205	-1.20654	1.19892e-18	1.59681e-17	GO:0005515	WD repeat containing protein WRAP73;note=predicted by EVM2;note=pfam_scan%3BPfam:PF00400.27%3B%3BE()%3D0.0050%3Bscore%3D16.5%3Bque ry 230-253%3Bdescription%3DWD40;note=pfam_scan%3BPfam:PF08662.6%3B%3BE()%3D7.3E-7%3Bscore%3D28.9%3Bquer y 96-215%3Bdescription%3DeIF2A;Smp_018580	Putative wd-repeat protein [Source:UniProtKB/TrEMBL;Acc:G4VGM3]	gi|224586777|ref|NP_060288.3|	WD repeat-containing protein WRAP73 [Homo sapiens]
Smp_092020	12.4651	12.1601	11.601	12.9895	4.81908	5.32685	6.60968	4.69271	-1.19825	5e-05	0.000181778	14.5653	15.3168	15.9383	16.5308	4.32031	7.43653	4.65325	5.43474	-0.810002	1.19616e-23	3.38025e-22	9.14475	9.30717	9.5189	9.81352	2.23282	4.27616	2.57407	3.01701	-1.12314	5.66013e-23	1.00195e-21		cement protein 3B variant 2;Smp_092020	Putative cement protein 3B variant 2 [Source:UniProtKB/TrEMBL;Acc:G4VAN6]	_	_
Smp_143690	47.3532	44.4457	36.2381	41.7431	20.2974	15.8383	23.4416	14.4258	-1.19801	5e-05	0.000181778	49.8207	54.5545	43.4739	45.0923	14.2017	22.6044	11.5091	12.4486	-0.927487	2.1309e-10	1.91362e-09	30.5752	32.7518	25.4181	26.3574	7.00675	12.5062	5.76511	6.80593	-1.30797	3.19603e-15	3.21785e-14	GO:0016020,GO:0016021,GO:0055085	feline leukemia virus subgroup C;Smp_143690	Feline leukemia virus subgroup C receptor-related [Source:UniProtKB/TrEMBL;Acc:G4VKF9]	gi|190341091|ref|NP_060261.2|	feline leukemia virus subgroup C receptor-related protein 2 isoform 1 [Homo sapiens]
Smp_095520	1256.53	1339.77	1176	1423.5	531.228	653.336	500.807	583.632	-1.19529	5e-05	0.000181778	1230.86	1261.51	1224.11	1322.45	327.658	410.272	395.061	455.509	-0.869472	4.85128e-40	3.41558e-38	793.859	771.937	741.072	792.568	172.522	243.01	217.723	259.215	-1.21949	1.8621e-29	4.99434e-28	GO:0003774,GO:0005737,GO:0005856,GO:0005874,GO:0005875,GO:0007017,GO:0030286	dynein light chain;Smp_095520	Dynein light chain [Source:UniProtKB/Swiss-Prot;Acc:Q94758]	gi|83267866|ref|NP_001032583.1|	dynein light chain 1, cytoplasmic [Homo sapiens]
SmVG_034859	2.14086	2.42712	2.49046	1.8003	1.42275	0.982675	0.458878	1.00843	-1.19375	0.00025	0.000810166	4.48847	4.01603	5.8639	3.4165	1.71647	1.12673	1.00346	2.17865	-0.836342	3.19215e-05	0.000129761	2.76579	2.584	3.6398	2.19056	0.973047	0.708136	0.63476	1.25592	-1.07109	3.30868e-05	9.95468e-05
SmVG_036002	3.44278	2.74993	2.27578	2.59618	1.42278	0.883222	1.61043	0.920819	-1.1937	5e-05	0.000181778	3.53762	4.62726	3.50636	3.80987	1.38544	2.00165	0.992493	1.16341	-0.789433	1.79602e-07	1.07057e-06	2.57348	3.32492	2.44079	2.62901	0.681547	1.29885	0.555306	0.73278	-1.21956	1.55323e-09	8.71599e-09	GO:0005198,GO:0005882,GO:0005637,GO:0005638
Smp_121660	48.4188	52.3963	43.7258	37.6037	17.4181	24.4228	20.5919	17.2449	-1.19284	5e-05	0.000181778	129.666	119.761	117.724	108.793	33.2896	45.855	48.4703	47.3027	-0.736094	4.47447e-17	7.69971e-16	81.6168	72.2857	70.0368	64.5313	17.3514	26.5633	27.2722	26.5544	-1.02176	2.73245e-16	3.03689e-15	GO:0005515	IDL peptide;Smp_121660	Putative uncharacterized protein [Source:UniProtKB/TrEMBL;Acc:G4LZA8]	_	_
Smp_194380	14.4893	21.1827	14.333	17.6539	4.41624	10.7393	5.92036	8.52317	-1.19273	5e-05	0.000181778	19.8908	14.6197	15.302	16.8797	2.89156	5.0183	6.84228	7.02547	-0.903817	7.57409e-06	3.48471e-05	12.6325	8.85565	9.33776	9.94527	1.58047	2.99442	3.99777	4.06563	-1.1696	6.87845e-07	2.70471e-06	GO:0016020,GO:0016263,GO:0016266,GO:0016267,GO:0016740,GO:0016757	glycoprotein N acetylgalactosamine;Smp_194380	Putative core 1 udp-galactose:n-acetylgalactosamine-alpha-r beta 1,3-galactosyltransferase [Source:UniProtKB/TrEMBL;Acc:G4VAU1]	gi|9910144|ref|NP_064541.1|	glycoprotein-N-acetylgalactosamine 3-beta-galactosyltransferase 1 [Homo sapiens]
SmVG_008455	2.32996	1.89607	1.26924	1.71124	1.02084	0.537081	0.875578	0.720452	-1.19214	5e-05	0.000181778	2.60121	3.39651	2.06685	2.34023	1.0233	1.28398	0.698943	0.908161	-0.716345	6.96306e-06	3.22653e-05	1.80906	2.29771	1.39926	1.49494	0.606398	0.924804	0.489467	0.661679	-0.851651	6.52017e-05	0.000185778
Smp_168670	4.97258	4.25137	3.50187	4.30887	1.9391	1.614	2.10305	1.80113	-1.19175	5e-05	0.000181778	5.31052	6.21228	5.07976	5.30567	1.8094	2.50539	1.91933	2.50823	-0.664701	2.1165e-10	1.90609e-09	3.24731	3.64818	2.93841	3.025	0.879095	1.3963	1.0141	1.34891	-0.927637	1.56592e-11	1.11528e-10	GO:0000166,GO:0004672,GO:0004674,GO:0004692,GO:0005524,GO:0006468,GO:0016301,GO:0016310,GO:0016740,GO:0016772	cGMP dependent protein kinase 1;Smp_168670	cGMP-dependent protein kinase,putative [Source:UniProtKB/TrEMBL;Acc:G4LX39]	gi|5453978|ref|NP_006250.1|	cGMP-dependent protein kinase 2 [Homo sapiens]
SmVG_030366:Smp_139530	6.89031	4.38318	4.49326	4.3574	2.29711	1.58135	3.26929	1.66613	-1.19108	5e-05	0.000181778	5.28973	8.78877	5.93757	5.29952	1.71715	3.35228	1.27325	1.70225	-0.928796	4.71435e-06	2.25138e-05	3.29991	5.24487	3.51483	3.10723	0.874363	1.91715	0.698929	0.932612	-1.26634	1.90909e-07	8.20253e-07		tumor protein p73;Smp_139530	Cellular tumor antigen P53, putative [Source:UniProtKB/TrEMBL;Acc:G4LYM1]	gi|187829017|ref|NP_001119713.1|	tumor protein p73 isoform c [Homo sapiens]
SmVG_030366:Smp_181780	6.89031	4.38318	4.49326	4.3574	2.29711	1.58135	3.26929	1.66613	-1.19108	5e-05	0.000181778	5.28973	8.78877	5.93757	5.29952	1.71715	3.35228	1.27325	1.70225	-0.928796	4.71435e-06	2.25138e-05	3.29991	5.24487	3.51483	3.10723	0.874363	1.91715	0.698929	0.932612	-1.26634	1.90909e-07	8.20253e-07		cellular tumor antigen p53;Smp_181780	Putative uncharacterized protein [Source:UniProtKB/TrEMBL;Acc:G4LYM2]	_	_
Smp_198690	11.9749	10.9129	11.2764	9.54581	4.32559	4.70626	6.02602	4.0972	-1.19024	5e-05	0.000181778	15.7105	17.8757	17.2943	14.5173	5.71503	7.53441	5.27189	6.2593	-0.713004	7.44114e-18	1.38913e-16	9.59386	10.4454	10.0437	8.33445	2.82398	4.25928	2.83412	3.39888	-0.978569	1.61389e-18	2.11479e-17	GO:0003824,GO:0004421,GO:0008152,GO:0008299,GO:0016740,GO:0016746	HMG-CoA synthase;Smp_198690	HMG-CoA synthase [Source:UniProtKB/TrEMBL;Acc:G4LWY6]	_	_
Smp_057060	40.6964	38.6841	41.7965	43.3354	18.1103	20.2981	16.1634	17.5691	-1.18931	5e-05	0.000181778	50.0468	57.9685	58.8486	55.7352	15.5914	17.7407	16.6266	18.4684	-0.911201	7.00356e-35	3.86954e-33	29.8366	33.0439	33.1328	30.9826	7.4259	9.71792	8.53237	9.5286	-1.29099	5.00046e-38	2.03701e-36	GO:0003824,GO:0005739,GO:0005829,GO:0006084,GO:0008410	hypothetical protein;Smp_057060	Putative uncharacterized protein [Source:UniProtKB/TrEMBL;Acc:G4V5J1]	_	_
Smp_201090	11.1643	10.7043	9.91819	9.4364	4.08213	4.63462	4.04865	5.31357	-1.18914	5e-05	0.000181778	9.75321	11.3875	10.5706	8.63651	2.79652	3.57835	2.63448	4.34494	-0.842784	3.91581e-09	2.98372e-08	6.70125	7.49518	6.51032	5.60508	1.50401	2.14236	1.54631	2.68764	-1.17399	2.31174e-11	1.61111e-10	GO:0016020,GO:0016021	hypothetical protein;note=tmhmm%3B%3Bquery 1-474%3B;note=%3Bquery 458-474%3B;note=%3Bquery 435-457%3B;note=%3Bquery 1-434%3B;Smp_201090	Putative uncharacterized protein Smp_201090 [Source:UniProtKB/TrEMBL;Acc:G4V6A2]	_	_
Smp_024820	42.8193	43.8531	39.2071	36.9289	16.8986	18.4584	19.369	16.6887	-1.18888	5e-05	0.000181778	122.492	123.788	113.731	113.589	39.1504	51.3529	40.3168	50.9198	-0.70244	4.51474e-28	1.70111e-26	72.5243	71.0732	64.1039	62.9682	18.2502	27.9191	20.0276	25.6436	-0.98073	2.53217e-28	6.30518e-27	GO:0016020,GO:0016021	tetraspanin family protein 16 invertebrate;Smp_024820	Tetraspanin, putative [Source:UniProtKB/TrEMBL;Acc:C4Q3U8]	gi|21264580|ref|NP_005716.2|	tetraspanin-2 [Homo sapiens]
SmVG_006320:Smp_019210	13.7269	12.7499	11.366	13.8218	5.41183	5.22997	6.74439	5.29179	-1.18788	5e-05	0.000181778	14.1821	17.0309	13.9475	15.5802	4.05851	6.68975	3.8313	4.93819	-0.896887	4.75424e-20	1.06504e-18	9.14407	10.5038	8.70226	9.58968	2.21518	3.96067	2.24229	2.8312	-1.23258	2.83093e-25	5.90191e-24		hypothetical protein;Smp_019210	Putative uncharacterized protein [Source:UniProtKB/TrEMBL;Acc:G4LUD4]	_	_
SmVG_006320:Smp_132700	13.7269	12.7499	11.366	13.8218	5.41183	5.22997	6.74439	5.29179	-1.18788	5e-05	0.000181778	14.1821	17.0309	13.9475	15.5802	4.05851	6.68975	3.8313	4.93819	-0.896887	4.75424e-20	1.06504e-18	9.14407	10.5038	8.70226	9.58968	2.21518	3.96067	2.24229	2.8312	-1.23258	2.83093e-25	5.90191e-24		nephrin;Smp_132700	Nephrin, putative [Source:UniProtKB/TrEMBL;Acc:G4LUD3]	_	_
Smp_194690	4.06176	3.78105	4.43981	4.29476	1.96216	1.31274	1.91266	2.09206	-1.18728	0.00175	0.00471158	4.83022	5.29575	6.20748	5.26694	1.73889	2.09734	1.24091	2.02057	-0.866496	2.94004e-16	4.70445e-15	3.09402	3.17151	3.748	3.17993	0.912822	1.24656	0.695464	1.13783	-1.19309	7.74944e-15	7.54485e-14	GO:0006508,GO:0008233,GO:0008237	zinc metalloprotease;Smp_194690	Putative zinc metalloprotease [Source:UniProtKB/TrEMBL;Acc:G4VGD9]	_	_
Smp_148290	8.59442	8.62502	7.65228	6.44442	3.03562	2.71931	4.89116	3.11294	-1.18653	5e-05	0.000181778	9.49226	10.9129	11.4505	7.59622	2.61561	4.99807	1.88249	2.50954	-0.964635	8.77441e-08	5.52707e-07	6.14602	6.89229	7.21383	4.71568	1.35027	2.9853	1.09945	1.45686	-1.31472	1.19953e-08	6.03547e-08	GO:0008270,GO:0046872	hypothetical protein;Smp_148290	Putative uncharacterized protein [Source:UniProtKB/TrEMBL;Acc:G4VBY7]	_	_
SmVG_018668	78.4701	67.7853	84.1031	66.761	31.1407	34.475	32.1808	33.2567	-1.18089	5e-05	0.000181778	71.8915	89.993	101.175	72.4956	22.7761	32.1975	26.1372	33.1424	-0.8131	5.75155e-36	3.31144e-34	46.1446	55.5905	61.2057	44.083	12.2183	19.2676	14.7722	18.746	-1.14654	2.71148e-27	6.3612e-26
Smp_213470	4.07791	2.6845	2.65201	2.87888	1.48877	0.998108	2.02177	0.91834	-1.17965	5e-05	0.000181778	5.45113	8.12217	5.04017	5.80813	2.29927	3.34587	1.09673	1.39659	-0.910081	0.000555177	0.001749	3.67173	5.61562	3.28752	3.67426	1.17393	1.97494	0.615988	0.827242	-1.28594	7.25848e-06	2.44274e-05	GO:0005198,GO:0005882,GO:0005637,GO:0005638	lamin%2C putative;Smp_213470
Smp_124710	1.70571	2.15368	1.55595	1.5856	0.419211	1.21825	0.766608	0.694593	-1.1759	5e-05	0.000181778	2.25713	2.21693	1.82433	1.76726	0.338613	0.689833	0.817163	0.595831	-0.96938	1.45887e-07	8.84581e-07	1.41734	1.30509	1.12343	1.0496	0.200009	0.410358	0.46737	0.357935	-1.24148	1.14001e-08	5.75384e-08	GO:0005089,GO:0005515,GO:0005622,GO:0035023,GO:0043547	hypothetical protein;Smp_124710	Putative uncharacterized protein [Source:UniProtKB/TrEMBL;Acc:G4VD57]	_	_
SmVG_016333	2.28092	2.94169	3.71138	2.66981	1.25219	1.29703	1.3589	1.22874	-1.17564	5e-05	0.000181778	3.95193	3.48911	5.80729	3.74359	1.0243	1.53462	1.17033	1.39606	-0.925858	1.34099e-13	1.68595e-12	2.38863	2.06208	3.35963	2.1642	0.505763	0.825966	0.62254	0.773328	-1.33369	6.05914e-13	4.90781e-12
Smp_035870	4.31083	2.8368	2.87681	2.52703	1.34826	1.79698	1.1806	1.23516	-1.17444	0.00015	0.000507999	2.96464	4.39266	3.56261	2.54214	0.817817	1.05447	1.06187	0.90075	-0.957969	1.0812e-06	5.71493e-06	1.79093	2.72218	2.11329	1.57773	0.420645	0.611726	0.563135	0.503884	-1.42119	1.50051e-08	7.43458e-08	GO:0005216,GO:0005249,GO:0005251,GO:0005267,GO:0006810,GO:0006811,GO:0006813,GO:0008076,GO:0016020,GO:0016021,GO:0055085,GO:0071805	Kv2 voltage gated potassium channel;Smp_035870	Putative voltage-gated potassium channel [Source:UniProtKB/TrEMBL;Acc:G4VMF2]	gi|27436974|ref|NP_004761.2|	potassium voltage-gated channel subfamily B member 2 [Homo sapiens]
Smp_180600	37.396	39.7294	37.5258	45.0381	17.4411	17.2956	19.6893	16.5572	-1.16972	5e-05	0.000181778	42.4176	42.0959	43.7789	47.1999	12.5019	18.6832	12.7012	15.553	-0.834397	1.06619e-37	6.98749e-36	25.7578	24.6568	25.3022	26.8598	6.17224	10.5379	6.78102	8.0697	-1.1533	1.69998e-31	5.07699e-30	GO:0001558,GO:0005515,GO:0005520,GO:0005576	Insulin growth factor binding protein 7;Smp_180600	Insulin-like growth factor binding protein-related [Source:UniProtKB/TrEMBL;Acc:G4VE46]	gi|19923632|ref|NP_112191.2|	kazal-type serine protease inhibitor domain-containing protein 1 precursor [Homo sapiens]
Smp_131940	15.2915	14.6608	13.1991	14.5869	6.85177	6.44794	6.61634	5.75443	-1.16942	5e-05	0.000181778	15.2546	16.9885	15.2862	15.1335	4.43345	6.01538	4.19483	4.98177	-0.910375	1.61645e-41	1.2294e-39	9.33566	10.0862	8.90215	8.69744	2.19473	3.3868	2.2538	2.65823	-1.2726	1.75581e-41	8.21852e-40	GO:0016020,GO:0016021	protein patched;Smp_131940	Putative patched 1 [Source:UniProtKB/TrEMBL;Acc:G4VNQ0]	gi|52145305|ref|NP_003729.3|	protein patched homolog 2 isoform 1 [Homo sapiens]
Smp_139330	1.75208	1.71446	1.66859	1.66507	0.684686	0.700273	0.868937	0.769898	-1.16922	5e-05	0.000181778	3.0643	3.72069	3.44609	3.23932	0.946348	1.43458	0.888744	1.20892	-0.857142	1.13538e-18	2.26727e-17	1.83121	2.04681	1.93546	1.76911	0.449357	0.805719	0.490529	0.645929	-1.12853	1.98017e-18	2.58777e-17	GO:0004889,GO:0005216,GO:0005230,GO:0005886,GO:0005892,GO:0006810,GO:0006811,GO:0007165,GO:0007271,GO:0015464,GO:0016020,GO:0016021,GO:0030054,GO:0034220,GO:0042166,GO:0045202,GO:0045211,GO:0098655,GO:0099565	nicotinic acetylcholine receptor non alpha;Smp_139330	NAChR subunit (ShAR1-beta-like) [Source:UniProtKB/TrEMBL;Acc:G4VN54]	gi|87567783|ref|NP_001034612.1|	acetylcholine receptor subunit alpha isoform a precursor [Homo sapiens]
Smp_137940	41.3968	40.0665	39.3372	45.9958	20.038	16.9614	17.5336	19.7056	-1.16785	5e-05	0.000181778	59.7009	60.5998	59.7876	62.4652	19.4416	23.769	16.8085	24.1725	-0.793813	2.6205e-23	7.22308e-22	49.248	45.5281	45.4863	46.3574	13.1718	17.0495	13.2923	19.6468	-1.00073	6.75623e-20	9.80213e-19	GO:0004385,GO:0005515,GO:0016301,GO:0016310,GO:0016740,GO:0046037,GO:0046710	guanylate kinase;Smp_137940	Putative guanylate kinase [Source:UniProtKB/TrEMBL;Acc:G4VGU4]	gi|4557529|ref|NP_001356.1|	disks large homolog 4 isoform 1 [Homo sapiens]
Smp_010820	24.9423	30.7967	22.862	24.9989	9.9928	13.1311	11.1435	11.8823	-1.16663	5e-05	0.000181778	43.2676	37.2778	35.8196	36.7612	10.6308	13.9749	13.3483	14.9772	-0.805723	4.37908e-27	1.51985e-25	26.4593	21.9763	20.7136	21.0795	5.19078	7.86795	7.00197	7.89509	-1.1346	3.69268e-23	6.6332e-22	GO:0003824,GO:0004497,GO:0004504,GO:0005507,GO:0005515,GO:0006518,GO:0016020,GO:0016829,GO:0055114	peptidylglycine alpha amidating monooxygenase;Smp_010820	Putative peptidyl-glycine alpha-amidating monooxygenase [Source:UniProtKB/TrEMBL;Acc:G4VMQ7]	gi|21070980|ref|NP_620176.1|	peptidyl-glycine alpha-amidating monooxygenase isoform c preproprotein [Homo sapiens]
SmVG_025567:Smp_117170	8.41719	6.66903	7.06408	7.33508	2.66355	3.6384	3.87185	2.97709	-1.16484	5e-05	0.000181778	7.81016	10.6275	9.46441	8.87132	2.05252	3.87413	2.44873	3.06629	-0.922251	5.63988e-15	8.06137e-14	4.98623	6.7222	5.93698	5.5757	1.22638	2.36024	1.58218	1.79824	-1.18864	1.78098e-14	1.67694e-13		innexin;Smp_117170	Putative innexin [Source:UniProtKB/TrEMBL;Acc:G4VSV5]	_	_
SmVG_025567:Smp_161890	8.41719	6.66903	7.06408	7.33508	2.66355	3.6384	3.87185	2.97709	-1.16484	5e-05	0.000181778	7.81016	10.6275	9.46441	8.87132	2.05252	3.87413	2.44873	3.06629	-0.922251	5.63988e-15	8.06137e-14	4.98623	6.7222	5.93698	5.5757	1.22638	2.36024	1.58218	1.79824	-1.18864	1.78098e-14	1.67694e-13		innexin;Smp_161890	Putative innexin [Source:UniProtKB/TrEMBL;Acc:G4VSV6]	_	_
Smp_154490	58.5662	46.4125	44.2259	48.065	19.9312	19.2558	32.887	15.9607	-1.16403	5e-05	0.000181778	52.5463	71.6573	55.9724	54.4367	15.2322	33.3828	14.1521	15.0833	-0.905121	8.85267e-07	4.74027e-06	32.0498	42.0737	32.479	31.2603	7.47626	18.7038	7.55763	8.04999	-1.21399	5.54937e-09	2.91417e-08	GO:0005515,GO:0007165	ras associating and dilute domain containing protein;Smp_154490	Putative multiple pdz domain protein [Source:UniProtKB/TrEMBL;Acc:G4VQM5]	_	_
SmVG_023113:Smp_142970	17.0111	18.9297	12.0254	14.5965	7.86732	6.32206	7.41825	6.32087	-1.16356	5e-05	0.000181778	46.7903	41.4012	33.1141	35.1748	12.2641	14.9384	10.3392	12.621	-0.874891	2.29338e-15	3.38809e-14	28.9632	24.5845	19.4902	20.564	6.16605	8.56101	5.71097	6.9154	-1.24023	1.52479e-19	2.16089e-18		palmitoyl protein thioesterase 1;Smp_142970	Putative palmitoyl-protein thioesterase [Source:UniProtKB/TrEMBL;Acc:G4VNU1]	gi|4506031|ref|NP_000301.1|	palmitoyl-protein thioesterase 1 isoform 1 precursor [Homo sapiens]
SmVG_023113:Smp_142980	17.0111	18.9297	12.0254	14.5965	7.86732	6.32206	7.41825	6.32087	-1.16356	5e-05	0.000181778	46.7903	41.4012	33.1141	35.1748	12.2641	14.9384	10.3392	12.621	-0.874891	2.29338e-15	3.38809e-14	28.9632	24.5845	19.4902	20.564	6.16605	8.56101	5.71097	6.9154	-1.24023	1.52479e-19	2.16089e-18		palmitoyl protein thioesterase;Smp_142980	Putative palmitoyl-protein thioesterase [Source:UniProtKB/TrEMBL;Acc:G4VNU2]	gi|4506031|ref|NP_000301.1|	palmitoyl-protein thioesterase 1 isoform 1 precursor [Homo sapiens]
SmVG_025144:Smp_118100	17.0087	15.0576	13.6707	14.8536	6.79193	5.71814	8.44715	6.1014	-1.163	5e-05	0.000181778	16.0409	19.5258	16.0377	16.0737	4.83336	8.38388	4.30255	5.94215	-0.82752	4.60907e-14	6.03489e-13	9.98778	11.7184	9.45185	9.36571	2.43508	4.73409	2.31	3.24445	-1.15341	9.25308e-17	1.06487e-15		tyrosine protein kinase transmembrane receptor;Smp_118100
SmVG_025144:Smp_157650	17.0087	15.0576	13.6707	14.8536	6.79193	5.71814	8.44715	6.1014	-1.163	5e-05	0.000181778	16.0409	19.5258	16.0377	16.0737	4.83336	8.38388	4.30255	5.94215	-0.82752	4.60907e-14	6.03489e-13	9.98778	11.7184	9.45185	9.36571	2.43508	4.73409	2.31	3.24445	-1.15341	9.25308e-17	1.06487e-15		tyrosine protein kinase transmembrane receptor;Smp_157650	Putative uncharacterized protein [Source:UniProtKB/TrEMBL;Acc:G4VPB9]	_	_
Smp_196110	98.1159	84.1652	100.843	98.7878	38.598	45.3992	46.9899	39.6958	-1.16192	5e-05	0.000181778	89.0205	109.814	116.614	102.637	26.9595	43.9483	31.154	34.1463	-0.869568	3.84606e-37	2.43012e-35	53.9327	64.0779	67.0776	58.3943	13.2802	24.4857	16.3745	18.1087	-1.21919	1.55441e-30	4.41217e-29	GO:0016020,GO:0016021,GO:0016787,GO:0017040,GO:0055114	ferric chelate reductase 1;Smp_196110	Ceramidase [Source:UniProtKB/TrEMBL;Acc:G4VNB4]	gi|147900821|ref|NP_001013682.2|	ferric-chelate reductase 1 [Homo sapiens]
Smp_135380	6.52572	5.45624	4.42911	4.93481	2.77708	1.65795	3.19343	1.91238	-1.16177	5e-05	0.000181778	5.53926	7.19742	5.19778	5.08167	1.93799	2.99754	1.25892	1.80616	-0.831895	9.07141e-07	4.84897e-06	3.43453	4.23731	3.01732	2.92441	0.952041	1.66063	0.644207	0.954216	-1.14874	2.84144e-08	1.36479e-07	GO:0000981,GO:0003676,GO:0003700,GO:0005622,GO:0005634,GO:0006351,GO:0006357,GO:0008270,GO:0040034,GO:0046872	hunchback;Smp_135380	Putative hunchback protein [Source:UniProtKB/TrEMBL;Acc:G4VQG9]	gi|210031219|ref|NP_612383.1|	zinc finger protein 845 [Homo sapiens]
Smp_181050	81.666	79.0542	61.4849	71.935	34.2196	29.3848	38.7955	29.1029	-1.16141	5e-05	0.000181778	91.9737	101.99	78.6714	84.0545	25.9147	39.6741	23.1846	27.9424	-0.872463	2.12303e-16	3.45545e-15	55.6627	59.3814	45.0778	47.5774	12.5987	22.0241	12.0372	14.6403	-1.22399	1.99565e-20	3.01235e-19	GO:0007018,GO:0016020,GO:0016021,GO:0019894	hypothetical protein;Smp_181050	Putative uncharacterized protein [Source:UniProtKB/TrEMBL;Acc:G4V5E4]	_	_
Smp_174060	2.63551	3.4108	3.22203	2.16892	1.08776	1.14812	1.62906	1.24886	-1.16127	0.00185	0.00495565	3.28562	2.64299	3.73841	2.10701	0.878916	1.48119	0.780306	1.27829	-0.706494	0.00151012	0.004302	2.1153	1.62775	2.3238	1.28614	0.469424	0.915725	0.453644	0.739169	-0.971649	0.000230948	0.000599921		hypothetical protein;Smp_174060	Putative uncharacterized protein [Source:UniProtKB/TrEMBL;Acc:G4VTT4]	_	_
Smp_130250	33.2334	24.7137	22.6388	27.2452	11.5299	8.40797	19.2701	9.06241	-1.15956	5e-05	0.000181778	31.2165	42.1052	33.4129	35.5021	11.5161	23.614	9.36212	12.1104	-0.719679	4.03626e-05	0.000160837	20.1068	25.912	20.3628	21.5497	6.11956	14.1554	5.48865	6.97061	-0.942465	1.64533e-06	6.09318e-06	GO:0000166,GO:0004672,GO:0004674,GO:0005524,GO:0006468,GO:0016301,GO:0016310,GO:0016772	dual specificity;Smp_130250	Dual specificity kinase [Source:UniProtKB/TrEMBL;Acc:G4VMK2]	gi|4758222|ref|NP_004705.1|	dual specificity tyrosine-phosphorylation-regulated kinase 1B isoform a [Homo sapiens]
Smp_161240	11.488	10.1617	11.5711	8.53862	5.22442	7.2568	2.8543	3.39644	-1.1566	0.00945	0.0209861	20.1021	23.6272	23.3831	29.9354	6.33691	7.80712	8.79871	8.75011	-0.793023	0.000248627	0.000844823	12.6783	14.1627	13.9121	17.7691	3.22504	4.51421	5.14619	4.84351	-1.12806	1.54879e-05	4.92617e-05		hypothetical protein;Smp_161240	Putative uncharacterized protein [Source:UniProtKB/TrEMBL;Acc:G4M0C1]	_	_
Smp_123360	9.8174	9.38268	8.84464	9.30803	4.47238	3.43142	5.23572	3.63622	-1.15484	5e-05	0.000181778	9.54889	11.2419	10.0072	9.75827	2.99458	4.68116	2.26836	3.17844	-0.898978	2.51172e-14	3.35649e-13	5.94627	6.74944	5.96099	5.72703	1.50835	2.69322	1.2362	1.73674	-1.2343	4.7011e-16	5.10825e-15		serine rich repeat protein 2;note=predicted by EVM2;Smp_123360	Serine-rich repeat protein 2 , putative [Source:UniProtKB/TrEMBL;Acc:G4LVL2]	_	_
Smp_123300	7.2574	6.14492	6.45479	5.85938	2.05874	3.76005	2.46469	3.28402	-1.15262	5e-05	0.000181778	5.21524	5.97894	5.8399	4.70804	1.02552	1.83506	1.91367	2.43226	-0.874245	1.34467e-09	1.08215e-08	4.11079	4.58328	4.40356	3.60496	0.764171	1.352	1.52869	1.63823	-1.17054	3.02884e-10	1.86049e-09	GO:0005515	follistatin;note=pfam_scan%3BPfam:PF07648.10%3B%3BE()%3D0.17%3Bscore%3D11.7%3Bquery 87-112%3Bdescription%3DKazal_2;note=pfam_scan%3BPfam:PF07648.10%3B%3BE()%3D2.6E-6%3Bscore%3D27.1%3Bque ry 399-424%3Bdescription%3DKazal_2;note=pfam_scan%3BPfam:PF07648.10%3B%3BE()%3D5.3E-9%3Bscore%3D35.7%3Bque ry 265-307%3Bdescription%3DKazal_2;note=iprscan%3BInterPro:IPR011497 : Protease inhibitor%2C Kazal-type%3…	Putative follistatin [Source:UniProtKB/TrEMBL;Acc:G4VLM0]	_	_
Smp_153930	4.82919	6.19149	6.08738	7.38987	2.43189	3.02824	2.54651	3.05779	-1.14673	5e-05	0.000181778	8.30933	6.75192	8.88472	9.80813	2.35806	2.73194	2.64108	3.60902	-0.822447	1.34451e-09	1.08215e-08	5.03238	3.9327	5.12945	5.64818	1.16679	1.55721	1.4075	1.94106	-1.16988	1.40293e-09	7.9136e-09	GO:0004222,GO:0006508,GO:0007155,GO:0008270,GO:0016020	invadolysin (M08 family);Smp_153930	Invadolysin (M08 family) [Source:UniProtKB/TrEMBL;Acc:G4VJ38]	gi|110556638|ref|NP_149018.2|	leishmanolysin-like peptidase isoform 2 [Homo sapiens]
Smp_196250	31.8682	22.1589	18.4324	22.5986	11.6368	7.26476	15.2073	8.8491	-1.14588	5e-05	0.000181778	32.2273	48.9178	29.0372	32.3614	11.026	19.0683	6.71203	10.5358	-0.892196	4.19926e-05	0.000166793	20.2146	29.3676	17.426	19.0701	5.64741	11.0168	3.78342	5.87282	-1.20098	2.25338e-07	9.58449e-07	GO:0003779,GO:0007010,GO:0051015	supervillin;Smp_196250	Putative supervillin [Source:UniProtKB/TrEMBL;Acc:G4V8Z1]	gi|150417973|ref|NP_068506.2|	supervillin isoform 2 [Homo sapiens]
Smp_153260	3.10927	3.7036	2.3374	2.98152	1.59214	1.19991	1.20854	1.48614	-1.14478	5e-05	0.000181778	4.27039	4.25729	3.06168	3.5621	1.40855	1.41726	0.77894	1.5818	-0.82459	1.06656e-06	5.64237e-06	2.75346	2.60213	1.86797	2.14176	0.738604	0.839458	0.446554	0.924941	-1.13715	3.86111e-07	1.57882e-06	GO:0016021	hypothetical protein;Smp_153260	Putative uncharacterized protein [Source:UniProtKB/TrEMBL;Acc:G4VNW7]	_	_
SmVG_024550	5.3583	2.40853	3.21589	3.75283	2.13757	0.72399	3.25109	0.56138	-1.14267	0.0098	0.0216575	2.89419	5.70354	2.97597	4.05881	1.31537	2.70115	0.453824	0.446858	-1.0385	0.0129902	0.0286473	2.32257	4.9024	2.27375	3.19048	0.892921	2.16002	0.530397	0.259422	-1.11822	0.0115734	0.0212082
Smp_127390	7.30959	5.29888	3.1358	5.48948	3.26079	1.73207	3.13775	1.49188	-1.14188	5e-05	0.000181778	4.85871	6.85742	3.44124	4.72132	1.36984	2.56106	1.02828	1.07472	-0.947875	7.52579e-05	0.000283889	3.33134	4.72032	2.21735	3.22085	0.931554	1.65005	0.728998	0.613939	-1.23391	7.4832e-05	0.000211178		hypothetical protein;Smp_127390	Putative uncharacterized protein [Source:UniProtKB/TrEMBL;Acc:G4LUH7]	_	_
Smp_166820	2.4485	2.02291	1.8892	2.14839	0.552112	0.9715	1.63206	0.703111	-1.14084	5e-05	0.000181778	2.97309	3.71679	3.21153	3.10127	0.734672	2.10164	0.90504	1.21723	-0.775428	9.19344e-06	4.17209e-05	1.79211	2.15332	1.82474	1.75053	0.35425	1.16052	0.470168	0.641432	-0.995936	7.38242e-06	2.47995e-05		hypothetical protein;Smp_166820	Putative uncharacterized protein [Source:UniProtKB/TrEMBL;Acc:G4VGI6]	gi|190194355|ref|NP_065941.2|	protein CIP2A [Homo sapiens]
SmVG_023745	71.5053	60.4009	49.2819	63.5036	33.2345	19.4769	36.0165	22.2805	-1.1403	5e-05	0.000181778	65.7277	79.6214	54.3454	63.8484	24.8009	33.1139	15.1017	20.2441	-0.783638	4.14659e-06	1.99415e-05	43.6871	51.6655	34.4702	41.3961	12.8284	20.5647	8.23812	11.8036	-1.11185	4.12628e-08	1.94545e-07	GO:0004719,GO:0006464
Smp_105360	2.13852	2.28408	2.09163	2.15557	0.667181	0.985851	1.45493	0.828786	-1.13899	5e-05	0.000181778	2.27572	2.36826	2.34382	2.16208	0.438532	1.29902	0.647362	0.714284	-0.891265	1.93023e-07	1.14283e-06	1.40441	1.40947	1.38734	1.25271	0.218764	0.738641	0.346383	0.383391	-1.15388	1.15248e-07	5.12119e-07	GO:0005509,GO:0005515,GO:0016020,GO:0030154	neurogenic locus notch protein;Smp_105360	Notch [Source:UniProtKB/TrEMBL;Acc:G4V5E1]	gi|148833508|ref|NP_060087.3|	neurogenic locus notch homolog protein 1 preproprotein [Homo sapiens]
Smp_064200	10.3087	6.95084	4.31327	7.05429	4.37529	1.67031	4.69477	2.26935	-1.13779	5e-05	0.000181778	8.90094	14.3443	6.35333	9.19297	3.33037	5.5872	1.93191	2.66986	-0.823706	0.00207303	0.0057064	5.7282	9.04205	3.98345	5.45005	1.7535	3.4263	1.06855	1.46162	-1.12934	0.000222262	0.000578594		ocrl type II inositol 5 phosphatase;note=predicted by EVM2;Smp_064200	Putative uncharacterized protein [Source:UniProtKB/TrEMBL;Acc:G4V759]	_	_
Smp_068500	43.6167	51.7043	41.6672	47.9674	19.3866	24.7802	18.2384	21.6766	-1.13731	5e-05	0.000181778	51.3381	45.5031	45.4029	47.0667	12.9402	16.0521	17.0154	18.3136	-0.824876	3.39622e-25	1.04092e-23	31.0612	26.6633	26.2124	26.9587	6.21683	8.97334	8.87424	9.53599	-1.15991	1.92629e-23	3.55196e-22		hypothetical protein;Smp_068500	Putative uncharacterized protein [Source:UniProtKB/TrEMBL;Acc:G4VTK1]	_	_
Smp_129260	64.9975	53.8912	49.4781	58.4398	25.3076	21.0263	36.3905	20.4386	-1.13654	5e-05	0.000181778	68.3752	87.4547	68.3848	71.93	21.9677	40.7896	18.9372	22.1581	-0.827661	3.94464e-08	2.62287e-07	41.2208	50.8878	39.1336	40.4585	10.5342	22.5113	9.71641	11.4649	-1.13153	5.66263e-11	3.76066e-10	GO:0003677,GO:0003910,GO:0003950,GO:0005634,GO:0005737,GO:0006273,GO:0006471,GO:0008270,GO:0016740,GO:0016757,GO:0051103,GO:0051287	poly (ADP ribose) polymerase;Smp_129260
Smp_019030	461.139	563.899	446.462	525.775	216.672	248.474	223.428	219.955	-1.13643	5e-05	0.000181778	606.77	525.336	522.331	558.801	158.82	210.806	180.844	196.898	-0.819832	9.02231e-35	4.91876e-33	366.739	304.282	298.432	316.054	77.5179	117.347	95.0802	104.685	-1.15525	1.03256e-26	2.35986e-25	GO:0004197,GO:0005615,GO:0005764,GO:0006508,GO:0008233,GO:0008234,GO:0016787,GO:0051603	hypothetical protein;Smp_019030	Cathepsin C [Source:UniProtKB/Swiss-Prot;Acc:Q26563]	gi|189083844|ref|NP_001805.3|	dipeptidyl peptidase 1 isoform a preproprotein [Homo sapiens]
Smp_158620	28.5311	27.5111	21.6933	28.0223	13.0202	11.633	13.5992	9.86856	-1.13603	0.00015	0.000507999	37.2372	40.0757	34.6143	39.4903	11.455	16.3358	10.9608	11.1611	-0.849824	9.95685e-19	1.99802e-17	22.1471	22.8314	19.4933	22.0017	5.44652	8.98781	5.60803	5.87558	-1.1801	2.18493e-17	2.61976e-16		retinaldehyde binding protein;Smp_158620	Retinaldehyde binding protein-related [Source:UniProtKB/TrEMBL;Acc:G4LZ90]	_	_
Smp_011030	16.59	19.1622	14.6702	15.2625	10.0741	6.67819	8.02327	5.14313	-1.13452	5e-05	0.000181778	24.8428	24.6034	21.4596	19.4264	8.04269	9.79069	5.45583	6.38175	-0.843407	4.26127e-10	3.66641e-09	15.5517	14.7562	12.7328	11.3867	4.12248	5.61876	3.00722	3.51502	-1.16078	1.68695e-09	9.40672e-09		heme binding protein 2;note=predicted by EVM2;Smp_011030
Smp_128760	20.3903	20.3987	21.1869	19.4095	8.72691	9.65255	8.4228	10.281	-1.134	5e-05	0.000181778	20.3141	22.2508	23.9796	20.5974	6.20615	7.61485	6.17134	9.05478	-0.846337	1.91951e-27	6.77658e-26	12.3499	13.2559	13.8753	11.9466	2.93983	4.28867	3.13444	4.83369	-1.24285	1.23322e-29	3.3632e-28	GO:0016020,GO:0016021	hypothetical protein;note=predicted by EVM2;note=tmhmm%3B%3Bquery 1-346%3B;note=%3Bquery 86-130%3B;note=%3Bquery 63-85%3B;note=%3Bquery 131-153%3B;note=%3Bquery 1-62%3B;note=%3Bquery 154-346%3B;Smp_128760	Putative uncharacterized protein [Source:UniProtKB/TrEMBL;Acc:G4VC59]	_	_
Smp_156680	5.40959	3.12494	3.01496	3.56202	2.55302	0.911207	1.19821	2.22854	-1.13287	5e-05	0.000181778	3.27434	6.28518	3.63602	3.95225	1.6399	1.15	0.703434	1.92859	-0.912213	0.000329296	0.00109125	2.03439	3.79442	2.23153	2.33498	0.894384	0.701306	0.347595	1.06902	-1.22242	9.12104e-05	0.000253721	GO:0005524,GO:0005622,GO:0016301,GO:0016310,GO:0035556,GO:0044267,GO:0046872	fyve finger containing phosphoinositide;Smp_156680
Smp_144310	3.75794	3.62196	3.0773	3.65175	1.72632	1.59693	2.0609	1.05188	-1.13237	5e-05	0.000181778	4.29337	5.1518	4.22199	4.671	1.52071	2.20725	1.21086	1.35278	-0.830135	7.78181e-11	7.38673e-10	2.73549	3.12615	2.50116	2.78443	0.758955	1.34012	0.730624	0.796169	-1.07792	2.06524e-10	1.28399e-09	GO:0005216,GO:0005249,GO:0005251,GO:0005267,GO:0005515,GO:0006810,GO:0006811,GO:0006813,GO:0008076,GO:0016020,GO:0016021,GO:0055085,GO:0071805	potassium voltage gated channel subfamily KQT;Smp_144310	Voltage-gated potassium channel, KCNQ [Source:UniProtKB/TrEMBL;Acc:G4VB79]	gi|26051264|ref|NP_742105.1|	potassium voltage-gated channel subfamily KQT member 2 isoform a [Homo sapiens]
Smp_090080	866.116	871.405	712.002	875.382	365.095	369.947	463.528	318.233	-1.13228	5e-05	0.000181778	1294.13	1356.12	1210.21	1330.06	388.395	630.519	396.551	443.217	-0.774357	2.76692e-19	5.82757e-18	817.763	818.76	725.768	791.568	201.732	366.859	225.923	250.99	-1.07334	3.3137e-19	4.60888e-18	GO:0004867,GO:0005615,GO:0010951	Estrogen regulated protein EP45;Smp_090080	Serpin, putative [Source:UniProtKB/TrEMBL;Acc:G4LYU6]	gi|170295807|ref|NP_001116224.1|	neuroserpin precursor [Homo sapiens]
Smp_140090	3.81955	1.86151	1.58639	1.35424	1.22192	0.838247	1.54745	0.330079	-1.13062	0.0027	0.00692927	2.4158	4.69781	2.2954	1.58558	0.821425	1.51666	0.774426	0.561303	-0.785638	0.00635079	0.015391	1.83546	3.28465	2.02513	1.40623	0.622509	1.09124	0.546332	0.438266	-1.08661	0.00108791	0.00248111		hypothetical protein;Smp_140090	Putative uncharacterized protein [Source:UniProtKB/TrEMBL;Acc:G4VMY8]	_	_
Smp_199900	28.6557	19.889	28.8296	27.9065	14.0061	10.9407	14.9455	8.33359	-1.12636	0.00085	0.00246206	19.1413	27.5233	28.8216	24.5123	8.46539	10.2945	5.72997	6.45319	-0.856705	0.00142163	0.00407062	25.0645	44.829	40.3074	45.3072	9.73274	20.7597	7.683	10.7478	-1.07624	6.4312e-05	0.000183458		phospholipid transport protein;Smp_199900	Phospholipid transport protein [Source:UniProtKB/TrEMBL;Acc:G4M251]	_	_
Smp_095630	241.972	240.936	214.265	219.67	105.037	104.5	115.423	95.3315	-1.12529	5e-05	0.000181778	275.621	301.333	275.302	248.549	78.3321	116.692	72.682	87.183	-0.882654	1.33636e-33	6.88926e-32	166.105	175.891	157.741	141.929	38.8771	65.4674	38.6532	46.2085	-1.24995	8.67615e-29	2.25256e-27	GO:0005887,GO:0007166,GO:0016020,GO:0016021	Tetraspanin%2CIPR000301 CD9:CD37:CD63;Smp_095630	CD9-like protein Sm-TSP-1 [Source:UniProtKB/TrEMBL;Acc:Q86D97]	gi|283135199|ref|NP_570139.3|	tetraspanin-18 [Homo sapiens]
SmVG_012159:Smp_099800	40.0213	34.9609	31.3502	34.5899	15.7244	13.8997	19.0425	16.0263	-1.12322	5e-05	0.000181778	54.1509	63.4201	54.1607	52.7527	18.0571	28.3695	17.1974	23.0184	-0.71143	6.08057e-21	1.46612e-19	33.1661	37.3337	31.4993	30.3628	8.97167	15.9309	9.20419	12.3493	-0.993841	2.04856e-19	2.89895e-18		hypothetical protein;Smp_099800	Putative uncharacterized protein [Source:UniProtKB/TrEMBL;Acc:G4VGH2]	gi|21536371|ref|NP_009041.2|	telomerase protein component 1 [Homo sapiens]
SmVG_012159:Smp_099810	40.0213	34.9609	31.3502	34.5899	15.7244	13.8997	19.0425	16.0263	-1.12322	5e-05	0.000181778	54.1509	63.4201	54.1607	52.7527	18.0571	28.3695	17.1974	23.0184	-0.71143	6.08057e-21	1.46612e-19	33.1661	37.3337	31.4993	30.3628	8.97167	15.9309	9.20419	12.3493	-0.993841	2.04856e-19	2.89895e-18		telomerase protein component%3B telomerase associated protein;Smp_099810	Putative uncharacterized protein [Source:UniProtKB/TrEMBL;Acc:G4VGH3]	gi|21536371|ref|NP_009041.2|	telomerase protein component 1 [Homo sapiens]
SmVG_012159:Smp_176890	40.0213	34.9609	31.3502	34.5899	15.7244	13.8997	19.0425	16.0263	-1.12322	5e-05	0.000181778	54.1509	63.4201	54.1607	52.7527	18.0571	28.3695	17.1974	23.0184	-0.71143	6.08057e-21	1.46612e-19	33.1661	37.3337	31.4993	30.3628	8.97167	15.9309	9.20419	12.3493	-0.993841	2.04856e-19	2.89895e-18		hypothetical protein;Smp_176890
SmVG_020582	3.05362	3.37592	2.76674	3.77704	1.62267	2.2059	0.688626	1.4406	-1.1227	0.00035	0.00110242	1.95012	1.82391	1.88544	2.50419	0.746897	0.392355	0.513699	0.641711	-0.988541	0.000253487	0.000859679	1.63004	1.42037	1.48447	1.73927	0.400845	0.362209	0.499321	0.450269	-1.30694	1.69018e-06	6.25211e-06
Smp_041550	46.4723	51.0044	39.7504	46.8928	21.0653	25.0019	20.7603	17.8609	-1.12041	5e-05	0.000181778	78.3169	78.087	70.8488	73.5705	22.2661	28.8708	23.7518	22.7349	-0.858302	6.0869e-30	2.55091e-28	49.1739	47.2943	42.2564	43.3091	11.1455	16.5126	12.9219	12.3474	-1.21386	1.31711e-27	3.13531e-26		hypothetical protein;Smp_041550	Putative uncharacterized protein [Source:UniProtKB/TrEMBL;Acc:G4LWX6]	_	_
Smp_018870	4.99741	4.54177	4.38692	5.34128	1.95065	3.29624	1.74032	1.8825	-1.1192	5e-05	0.000181778	5.74002	6.67744	5.99799	6.79233	1.50796	2.34655	2.4878	1.96648	-0.8562	5.43101e-10	4.62763e-09	3.54064	3.98306	3.52611	3.94476	0.77578	1.38083	1.34002	1.06917	-1.17896	5.64073e-11	3.74868e-10		hypothetical protein;Smp_018870	Putative uncharacterized protein [Source:UniProtKB/TrEMBL;Acc:G4VG16]	_	_
Smp_211310	3.68951	3.19569	3.57186	3.89788	1.43817	1.71478	1.58735	1.87027	-1.1187	5e-05	0.000181778	3.79618	4.80925	4.51456	4.51957	1.36726	1.77516	1.29879	2.06077	-0.748666	2.11788e-10	1.90609e-09	2.4243	2.97007	2.74131	2.70948	0.687732	1.04846	0.734584	1.16115	-1.05002	7.88168e-12	5.77396e-11	GO:0004016,GO:0004383,GO:0005622,GO:0005886,GO:0006182,GO:0007165,GO:0009190,GO:0016849,GO:0020037,GO:0035556	soluble guanylate cyclase gcy;Smp_211310
Smp_134440	23.2909	24.3298	24.032	26.2146	11.9157	10.7471	11.2911	11.1273	-1.1183	5e-05	0.000181778	44.1589	49.6957	47.2375	45.3844	14.8106	18.2541	12.8477	17.3719	-0.823522	1.19151e-30	5.20587e-29	27.4692	29.6576	27.9291	26.5974	7.63279	10.514	7.21721	9.65359	-1.15218	1.19998e-34	4.29522e-33	GO:0000166,GO:0004470,GO:0004471,GO:0006108,GO:0016020,GO:0016021,GO:0016491,GO:0016616,GO:0046872,GO:0051287,GO:0055114	NADP dependent malic enzyme%2C mitochondrial;Smp_134440.2	Malic enzyme [Source:UniProtKB/TrEMBL;Acc:G4VPZ9]	gi|239049447|ref|NP_001155058.1|	NADP-dependent malic enzyme, mitochondrial precursor [Homo sapiens]
SmVG_025537	1.76289	1.58493	1.79959	2.10828	0.850825	0.647212	0.802175	1.04282	-1.11795	0.0011	0.00310334	1.66302	1.5915	1.93513	1.90129	0.815863	0.611733	0.436775	0.864696	-0.704984	0.00156689	0.00444342	1.074	1.08192	1.29319	1.1611	0.42297	0.481445	0.226721	0.708652	-0.775513	0.00336151	0.00694707	GO:0006813,GO:0015269,GO:0016020
Smp_173010	2.211	1.86148	2.53035	1.90092	1.1631	0.847412	1.17186	0.736663	-1.1176	5e-05	0.000181778	1.72994	2.05968	2.52872	1.75355	0.661211	0.856105	0.545252	0.56644	-0.857271	1.46624e-07	8.88617e-07	1.10452	1.26268	1.54463	1.07376	0.356974	0.529096	0.325055	0.338284	-1.14539	1.07649e-08	5.45585e-08	GO:0004930,GO:0007186,GO:0008528,GO:0016020,GO:0016021	neuropeptide receptor a;Smp_173010	Putative dro/myosuppressin receptor [Source:UniProtKB/TrEMBL;Acc:G4V9Z6]	_	_
Smp_069240	55.9299	53.0836	44.4537	48.7373	24.5084	17.8815	29.8924	20.9753	-1.11652	5e-05	0.000181778	52.2959	59.7663	49.2603	48.249	16.9075	26.8713	11.5164	18.5775	-0.819845	1.03769e-08	7.42903e-08	32.9311	36.0181	29.415	28.6682	8.68665	15.5914	6.43279	10.334	-1.11857	4.32999e-12	3.25284e-11	GO:0005216,GO:0005244,GO:0005249,GO:0005251,GO:0005267,GO:0005515,GO:0006810,GO:0006811,GO:0006813,GO:0008076,GO:0016020,GO:0016021,GO:0034765,GO:0051260,GO:0055085,GO:0071805	potassium voltage gated channel protein Shaker;Smp_069240	Potassium channel protein; Putative voltage-gated potassium channel [Source:UniProtKB/TrEMBL;Acc:Q26597]	gi|5031819|ref|NP_005540.1|	potassium voltage-gated channel subfamily A member 10 [Homo sapiens]
Smp_024870	177.881	138.192	119.682	128.239	73.6374	49.0468	93.0482	44.415	-1.11635	5e-05	0.000181778	174.832	244.371	170.44	168.446	63.7324	107.987	41.8676	50.072	-0.84542	3.64295e-05	0.000146395	110.376	147.437	101.429	100.164	32.7924	62.8374	23.4961	28.1659	-1.13627	4.81457e-07	1.94098e-06		hypothetical protein;note=predicted by EVM2;Smp_024870	Putative uncharacterized protein [Source:UniProtKB/TrEMBL;Acc:G4VMA3]	_	_
SmVG_029464:Smp_149590	3.27473	3.20219	2.7816	3.53719	1.32319	1.37355	1.77465	1.43174	-1.11611	5e-05	0.000181778	5.67404	6.18547	6.08683	6.59529	1.80553	3.16188	2.02547	2.93453	-0.670006	4.24987e-12	4.62977e-11	3.46538	3.68984	3.60339	3.79246	0.924533	1.81187	1.09911	1.57337	-0.908411	1.05907e-10	6.79253e-10		gamma aminobutyric acid receptor subunit;Smp_149590	Putative uncharacterized protein [Source:UniProtKB/TrEMBL;Acc:G4LXZ7]	_	_
SmVG_029464:Smp_149600	3.27473	3.20219	2.7816	3.53719	1.32319	1.37355	1.77465	1.43174	-1.11611	5e-05	0.000181778	5.67404	6.18547	6.08683	6.59529	1.80553	3.16188	2.02547	2.93453	-0.670006	4.24987e-12	4.62977e-11	3.46538	3.68984	3.60339	3.79246	0.924533	1.81187	1.09911	1.57337	-0.908411	1.05907e-10	6.79253e-10		gamma aminobutyric acid receptor subunit;Smp_149600	Histone H4 [Source:UniProtKB/TrEMBL;Acc:G4LXZ8]	gi|4504309|ref|NP_003533.1|	histone H4 [Homo sapiens]
Smp_152090	10.6305	8.51838	7.75298	8.34385	3.49004	3.6401	5.89558	3.24055	-1.11557	5e-05	0.000181778	8.66385	12.0098	8.93797	8.77155	2.51957	5.34078	2.6027	3.0304	-0.821706	4.51716e-08	2.97625e-07	5.39292	7.12198	5.25774	5.14684	1.24772	3.04502	1.38272	1.62233	-1.12843	1.09019e-08	5.51928e-08	GO:0016020,GO:0016021	hypothetical protein;Smp_152090	Putative uncharacterized protein [Source:UniProtKB/TrEMBL;Acc:G4VB97]	_	_
SmVG_035659	15.7192	18.0386	16.7648	21.9897	5.69454	7.85057	8.80847	11.1152	-1.11541	0.0002	0.000662986	28.5684	22.5669	29.4816	31.4474	6.11525	10.0884	7.50103	15.6709	-0.792301	4.19653e-06	2.01659e-05	26.4355	17.601	25.9831	23.9754	5.15198	7.4563	7.53113	11.2008	-1.12856	3.47087e-07	1.43431e-06
Smp_035650	3.11417	3.1529	2.63833	2.36359	0.9613	1.29675	1.5763	1.36964	-1.11467	5e-05	0.000181778	2.53883	2.99531	1.71968	1.72477	0.366966	0.899891	0.318539	0.796318	-1.12616	3.88598e-06	1.87835e-05	1.80457	1.81135	1.51059	1.35457	0.242839	0.746755	0.424089	0.585558	-1.18806	1.07257e-08	5.44165e-08	GO:0003677,GO:0003700,GO:0005634,GO:0006355,GO:0043565	dorsal root ganglia homeobox protein;Smp_035650	Homeobox protein aristaless-related [Source:UniProtKB/TrEMBL;Acc:G4V7Q2]	gi|31563344|ref|NP_852124.1|	paired box protein Pax-3 isoform PAX3e [Homo sapiens]
Smp_066050	2.5468	2.97027	2.98472	3.51953	1.19896	1.1313	2.16201	1.05968	-1.11453	0.0003	0.000957893	3.18372	3.00951	3.69643	3.78157	0.832644	2.16536	1.06185	1.28109	-0.713208	0.00110558	0.00324871	2.01098	1.81682	2.29148	2.24224	0.431293	1.29235	0.598394	0.714951	-0.905291	0.000300515	0.000763921	GO:0003700,GO:0005634,GO:0006355	transcriptional enhancer factor TEF 1;Smp_066050	Transcriptional enhancer factor (Tef) related [Source:UniProtKB/TrEMBL;Acc:G4VP26]	_	_
SmVG_014788	49.42	46.374	43.4761	48.086	18.1062	18.6557	27.6683	22.1082	-1.11437	0.0002	0.000662986	56.5043	73.1819	61.6636	59.2607	13.4864	27.6519	11.3379	15.5149	-1.07829	1.48668e-12	1.68979e-11	54.4239	67.3819	57.5985	56.5592	10.9763	24.0616	9.51447	12.9152	-1.52283	4.06474e-17	4.77374e-16
Smp_156580	1.68875	1.47341	1.45713	1.502	0.571754	0.94555	0.792896	0.517358	-1.11428	0.0015	0.00410094	1.79039	2.40025	2.20501	1.9531	0.569661	0.785151	0.721072	0.639212	-0.840628	0.000238922	0.000813868	1.13603	1.45176	1.3451	1.16363	0.286859	0.470135	0.397013	0.35034	-1.21638	5.22822e-07	2.09732e-06	GO:0004672,GO:0004713,GO:0005524,GO:0006468,GO:0016301,GO:0016310,GO:0016772	Tyrosine protein kinase Dnt;Smp_156580	Tyrosine kinase [Source:UniProtKB/TrEMBL;Acc:G4M0Y1]	gi|54607020|ref|NP_001005861.1|	tyrosine-protein kinase RYK isoform 1 [Homo sapiens]
Smp_170340	21.7419	15.6891	23.414	25.1891	9.36049	10.2854	9.27931	10.8418	-1.11333	5e-05	0.000181778	20.3472	29.3542	30.8306	30.9598	8.20922	10.4325	9.67948	11.3507	-0.766062	2.29871e-14	3.07853e-13	11.3766	15.6959	16.2698	16.2256	3.56352	5.32231	4.52584	5.516	-1.08485	5.58202e-16	6.01958e-15	GO:0005201,GO:0005578,GO:0005581,GO:0016020,GO:0016021	collagen alpha 1(IV) chain;Smp_170340	Putative collagen alpha-1(V) chain [Source:UniProtKB/TrEMBL;Acc:G4V8A8]	gi|148536825|ref|NP_001836.2|	collagen alpha-1(IV) chain preproprotein [Homo sapiens]
Smp_166790	51.3101	48.2673	47.6471	39.746	24.9231	18.5129	21.8003	21.2423	-1.11239	5e-05	0.000181778	75.1411	81.0276	76.0328	64.2033	27.4608	30.5335	20.8482	31.2175	-0.735631	1.5275e-21	3.84088e-20	46.9501	48.6115	45.015	37.6429	13.8429	17.5837	11.4807	17.2349	-1.02278	2.29308e-20	3.44528e-19	GO:0005385,GO:0005623,GO:0006882,GO:0016020,GO:0016021,GO:0030001,GO:0046873,GO:0055085,GO:0071577	zinc transporter ZIP13;Smp_166790	Putative solute carrier family 39 (Zinc transporter) [Source:UniProtKB/TrEMBL;Acc:G4VGI2]	gi|55741750|ref|NP_065075.1|	zinc transporter ZIP10 precursor [Homo sapiens]
SmVG_030877:Smp_156800	2.84242	2.56638	2.40681	2.52226	1.72352	1.0991	0.789814	1.17207	-1.1115	0.00015	0.000507999	1.99275	2.61435	1.89153	2.05489	0.607374	0.556634	0.514679	0.635629	-1.03475	3.46747e-12	3.81112e-11	1.53483	1.90482	1.60703	1.5362	0.562463	0.457505	0.396294	0.547556	-1.19758	1.40775e-09	7.93622e-09		hypothetical protein;note=tmhmm%3B%3Bquery 1-303%3B;note=%3Bquery 227-303%3B;note=%3Bquery 204-226%3B;note=%3Bquery 1-203%3B;Smp_156800	Putative uncharacterized protein [Source:UniProtKB/TrEMBL;Acc:G4LZ35]	_	_
SmVG_030877:Smp_156810	2.84242	2.56638	2.40681	2.52226	1.72352	1.0991	0.789814	1.17207	-1.1115	0.00015	0.000507999	1.99275	2.61435	1.89153	2.05489	0.607374	0.556634	0.514679	0.635629	-1.03475	3.46747e-12	3.81112e-11	1.53483	1.90482	1.60703	1.5362	0.562463	0.457505	0.396294	0.547556	-1.19758	1.40775e-09	7.93622e-09		hypothetical protein;Smp_156810	Putative uncharacterized protein [Source:UniProtKB/TrEMBL;Acc:G4LZ34]	_	_
Smp_166170	8.12811	9.08727	6.8729	8.1935	2.58043	4.76165	3.39343	4.25157	-1.107	5e-05	0.000181778	10.8844	9.99711	9.23263	9.59224	2.72152	4.01379	4.3234	5.4911	-0.644774	1.41625e-07	8.62138e-07	6.38955	5.64157	5.12065	5.35994	1.27669	2.13332	2.19593	2.67575	-0.910112	1.63196e-09	9.12622e-09		hypothetical protein;note=predicted by EVM2;Smp_166170	Putative uncharacterized protein [Source:UniProtKB/TrEMBL;Acc:G4VJI2]	_	_
SmVG_000515:Smp_071520	26.2655	29.9219	25.5426	31.9179	13.5291	11.9254	14.1003	13.2226	-1.10658	0.00015	0.000507999	169.206	172.876	168.981	181.365	56.1195	74.2274	51.0444	62.8847	-0.789187	1.21638e-33	6.29708e-32	95.5407	94.8574	88.9012	96.3508	22.4024	34.6213	20.1907	25.6288	-1.33325	7.45299e-31	2.15318e-29		hypothetical protein;Smp_071520	Putative uncharacterized protein [Source:UniProtKB/TrEMBL;Acc:G4V9J7]	_	_
SmVG_000515:Smp_161030	26.2655	29.9219	25.5426	31.9179	13.5291	11.9254	14.1003	13.2226	-1.10658	0.00015	0.000507999	169.206	172.876	168.981	181.365	56.1195	74.2274	51.0444	62.8847	-0.789187	1.21638e-33	6.29708e-32	95.5407	94.8574	88.9012	96.3508	22.4024	34.6213	20.1907	25.6288	-1.33325	7.45299e-31	2.15318e-29		hypothetical protein;Smp_161030	Putative uncharacterized protein [Source:UniProtKB/TrEMBL;Acc:G4V9J6]	_	_
SmVG_001855:Smp_035180	3.13236	3.06203	3.59224	3.25173	1.44608	1.19253	2.06057	1.35613	-1.10649	5e-05	0.000181778	6.21082	6.46933	7.55253	5.72377	2.22294	3.32794	2.03354	2.75485	-0.665894	1.50232e-07	9.09139e-07	4.42987	4.62891	5.10993	3.97844	1.3953	2.18818	1.40595	1.56402	-0.948716	3.49347e-10	2.12445e-09		potassium voltage gated channel subfamily D;Smp_035180	Putative voltage-gated potassium channel [Source:UniProtKB/TrEMBL;Acc:G4V810]	gi|27436984|ref|NP_004971.2|	potassium voltage-gated channel subfamily D member 3 isoform 1 [Homo sapiens]
SmVG_001855:Smp_141190	3.13236	3.06203	3.59224	3.25173	1.44608	1.19253	2.06057	1.35613	-1.10649	5e-05	0.000181778	6.21082	6.46933	7.55253	5.72377	2.22294	3.32794	2.03354	2.75485	-0.665894	1.50232e-07	9.09139e-07	4.42987	4.62891	5.10993	3.97844	1.3953	2.18818	1.40595	1.56402	-0.948716	3.49347e-10	2.12445e-09		hypothetical protein;Smp_141190	Putative uncharacterized protein [Source:UniProtKB/TrEMBL;Acc:G4V809]	_	_
Smp_152020	41.5974	43.8339	33.9498	42.8759	18.4834	18.1446	22.0489	16.6987	-1.10611	5e-05	0.000181778	62.3136	64.068	55.411	62.5136	18.6187	28.6638	17.4792	20.4988	-0.810259	3.62749e-18	6.97259e-17	38.4861	37.9246	32.5313	36.3081	9.3076	16.2799	9.49325	11.1394	-1.1297	3.51069e-21	5.53973e-20	GO:0016020,GO:0016021,GO:0016246,GO:0033227,GO:0051033	SID1 transmembrane family;Smp_152020	Putative uncharacterized protein [Source:UniProtKB/TrEMBL;Acc:G4VB89]	gi|94721340|ref|NP_001035545.1|	SID1 transmembrane family member 2 precursor [Homo sapiens]
Smp_172340	2.72227	3.3192	2.50542	2.19953	1.24436	1.16286	1.3356	1.25102	-1.10564	5e-05	0.000181778	3.43762	3.96421	2.93275	2.60508	0.992478	1.2421	0.685111	1.10771	-0.90864	1.7445e-08	1.21229e-07	2.36875	2.4631	1.92731	1.74754	0.523591	0.830822	0.514482	0.683437	-1.18761	3.48592e-11	2.37668e-10		hypothetical protein;Smp_172340	Putative uncharacterized protein [Source:UniProtKB/TrEMBL;Acc:G4VAN2]	_	_
Smp_144660	3.54258	3.19197	3.63156	3.02263	1.6324	1.52062	1.54949	1.52302	-1.10475	5e-05	0.000181778	5.0335	6.03692	7.21772	6.07409	2.0522	2.64308	1.90486	2.7309	-0.700683	5.60307e-11	5.37777e-10	2.90497	3.19674	3.91042	2.87383	0.798984	1.1868	0.792974	1.26015	-1.13111	4.64717e-13	3.83756e-12	GO:0004674,GO:0005634,GO:0005737,GO:0006468,GO:0035556	EF hand domain containing family member B;Smp_144660	Putative uncharacterized protein [Source:UniProtKB/TrEMBL;Acc:G4LWU7]	gi|148613876|ref|NP_653316.3|	EF-hand domain-containing family member B [Homo sapiens]
Smp_170020	4.25645	3.87452	4.60531	4.17269	1.62335	1.65881	2.35451	2.22618	-1.10466	5e-05	0.000181778	5.89083	6.11715	7.77205	6.91534	2.35484	2.95266	2.09243	3.03372	-0.680596	4.39065e-09	3.32089e-08	3.69871	3.66602	4.60255	4.04551	1.20538	1.69541	1.15069	1.66447	-0.952379	2.75366e-10	1.69789e-09	GO:0004930,GO:0005887,GO:0007166,GO:0007186,GO:0007218,GO:0016020,GO:0016021	tachykinin receptor protein like;Smp_170020	Putative neuropeptide receptor [Source:UniProtKB/TrEMBL;Acc:G4VTS0]	gi|223718060|ref|NP_001138752.1|	mu-type opioid receptor isoform MOR-1G1 [Homo sapiens]
Smp_141290	127.315	111.551	98.1205	107.782	49.756	51.0127	60.0673	46.11	-1.1038	5e-05	0.000181778	121.016	147.885	111.689	117.348	34.3539	54.4686	32.7728	37.9524	-0.891026	1.05017e-17	1.92834e-16	74.5277	87.4834	67.6382	68.4092	17.9643	31.9609	19.4225	22.8555	-1.18791	2.60729e-23	4.78052e-22	GO:0005921,GO:0006810,GO:0006811,GO:0016020,GO:0016021,GO:0030054	innexin;Smp_141290	Putative innexin [Source:UniProtKB/TrEMBL;Acc:G4V7R1]	_	_
Smp_195190	1778.49	1775.44	1477.82	1551.18	828.582	824.501	876.143	536.557	-1.10248	5e-05	0.000181778	1635.02	1707.31	1447.25	1349.07	489.624	698.104	497.287	402.895	-0.783977	9.09248e-09	6.58604e-08	1026.96	1020.88	855.959	794.336	246.723	402.015	271.534	220.897	-1.08356	3.75201e-12	2.83175e-11		13 kDa tegumental antigen Sm13;Smp_195190	13 kDa tegumental antigen Sm13 [Source:UniProtKB/TrEMBL;Acc:Q7KPG1]	_	_
Smp_083580	81.2494	86.6899	120.813	124.873	33.4161	61.2714	30.4712	67.5073	-1.10222	5e-05	0.000181778	75.4265	77.8026	114.808	98.2661	17.6658	23.2375	46.3223	59.308	-0.72493	0.0121385	0.0269867	154.388	143.304	225.449	209.606	31.6634	46.5148	68.5483	91.2251	-1.04057	8.59746e-05	0.000240255		hypothetical protein;note=predicted by EVM2;Smp_083580
Smp_167190	4.59031	3.51879	3.945	4.68415	1.67162	2.05213	2.27506	1.79979	-1.10186	5e-05	0.000181778	4.43787	6.14597	5.75439	5.87285	1.64752	2.66538	1.84551	2.08318	-0.738872	1.76394e-14	2.38568e-13	2.79594	3.66105	3.35131	3.41392	0.798786	1.49248	1.00232	1.11414	-1.0544	7.50135e-13	6.0358e-12	GO:0005509,GO:0005515,GO:0016020,GO:0016021	fibrillin 1;Smp_167190	Putative uncharacterized protein Smp_167190 [Source:UniProtKB/TrEMBL;Acc:G4V7D5]	gi|281485550|ref|NP_000129.3|	fibrillin-1 precursor [Homo sapiens]
Smp_167360	9.45018	8.0954	7.76074	9.71097	4.34416	3.36018	4.69015	3.92463	-1.1015	5e-05	0.000181778	8.22279	10.2527	8.98435	9.78558	3.0019	4.26383	2.30735	3.30901	-0.822223	9.04993e-15	1.26709e-13	5.12423	6.10894	5.30441	5.75416	1.5249	2.49322	1.29897	1.83196	-1.12452	9.75569e-17	1.11874e-15		BTB:POZ domain containing protein 7;note=predicted by EVM2;Smp_167360	Putative uncharacterized protein [Source:UniProtKB/TrEMBL;Acc:G4LXA9]	_	_
Smp_045360	67.7684	56.2693	52.1357	61.0446	30.5467	20.3708	38.4355	21.227	-1.10112	5e-05	0.000181778	61.6991	80.584	62.291	67.4733	22.0611	36.3687	13.7301	17.9262	-0.905306	3.95863e-06	1.91122e-05	37.0488	46.6087	35.3062	38.063	10.5515	19.8693	7.4276	9.91902	-1.19915	3.4709e-09	1.8701e-08		calsyntenin 2;Smp_045360.3	Putative uncharacterized protein [Source:UniProtKB/TrEMBL;Acc:G4VBR3]	gi|57242755|ref|NP_055759.3|	calsyntenin-1 isoform 2 [Homo sapiens]
Smp_137490	4.73468	4.87701	3.91697	4.64437	1.85509	1.69061	3.24835	1.6839	-1.10001	5e-05	0.000181778	5.54495	5.52447	5.05203	5.33311	1.60783	3.09435	1.47767	1.58746	-0.797281	6.80024e-08	4.34123e-07	3.43893	3.30477	2.98889	3.13035	0.815323	1.78181	0.811181	0.87368	-1.0569	6.96035e-08	3.19076e-07	GO:0005515	PDZ domain protein;Smp_137490	PDZ domain protein, putative [Source:UniProtKB/TrEMBL;Acc:G4LWY5]	_	_
Smp_131010	5.53751	3.78507	3.25207	4.28687	2.24951	1.88627	2.58168	1.14909	-1.09993	5e-05	0.000181778	5.62613	8.1012	4.45393	6.12164	2.02319	3.4464	1.43423	1.37486	-0.856218	0.000413976	0.00133454	3.67931	5.01671	2.76508	3.69112	1.05267	1.95333	0.77951	0.749035	-1.19219	1.26552e-05	4.0812e-05	GO:0005509,GO:0005886,GO:0007155,GO:0007156,GO:0016020,GO:0016021	protocadherin gamma a10;Smp_131010	Putative protocadherin gamma [Source:UniProtKB/TrEMBL;Acc:G4VHE5]	gi|14589929|ref|NP_061908.1|	protocadherin-18 precursor [Homo sapiens]
Smp_149120	8.18171	6.81259	6.18204	6.49516	3.09961	3.20798	3.44824	3.16555	-1.09864	5e-05	0.000181778	8.29371	10.2529	8.52656	7.75402	2.91114	4.00856	2.84858	3.67826	-0.697201	4.6245e-19	9.54413e-18	5.14653	6.14941	5.06738	4.53321	1.49636	2.34057	1.61628	2.0417	-0.955186	9.46485e-18	1.16941e-16	GO:0000808,GO:0005509,GO:0005634,GO:0005886,GO:0006260,GO:0007155,GO:0007156,GO:0016020,GO:0016021	insect origin recognition complex subunit;Smp_149120	Putative insect origin recognition complex subunit [Source:UniProtKB/TrEMBL;Acc:G4VH99]	gi|189571674|ref|NP_071407.4|	cadherin-23 isoform 1 [Homo sapiens]
Smp_180680	4.70229	4.19531	4.57769	4.62813	1.94391	2.01195	2.42083	2.08675	-1.09695	5e-05	0.000181778	5.30938	6.10256	6.32665	5.52664	2.1809	2.82247	2.10629	2.54189	-0.622826	2.28414e-10	2.04527e-09	3.13006	3.57698	3.46461	3.09183	0.86925	1.42466	0.888424	1.17546	-1.06783	4.37607e-16	4.76039e-15	GO:0005488	armadillo repeat containing protein 2;Smp_180680	Putative uncharacterized protein [Source:UniProtKB/TrEMBL;Acc:G4VQ90]	gi|148762963|ref|NP_115507.4|	armadillo repeat-containing protein 2 [Homo sapiens]
Smp_194740	5.49793	4.4267	4.99046	3.49258	2.23636	1.61622	2.8789	1.87577	-1.09668	5e-05	0.000181778	7.00674	8.22883	8.44634	6.63099	2.43875	3.55416	1.28322	2.41504	-0.926379	2.22968e-07	1.31068e-06	4.55442	5.04742	5.05624	4.04552	1.22374	2.10597	0.772688	1.40418	-1.23131	2.18064e-10	1.354e-09	GO:0004930,GO:0007186,GO:0008528,GO:0016020,GO:0016021	G protein coupled receptor fragment;Smp_194740	Putative g-protein coupled receptor [Source:UniProtKB/TrEMBL;Acc:G4VAU7]	_	_
SmVG_024852:Smp_130750	24.5708	17.2647	17.2798	20.5194	9.4549	6.40348	15.068	6.33972	-1.09553	5e-05	0.000181778	26.1017	39.276	27.4296	30.7249	10.2679	20.0106	7.25743	8.87741	-0.785939	0.000254674	0.000862756	15.8849	22.9064	15.9877	17.5214	5.13949	11.275	4.00032	4.96822	-1.00658	9.21484e-06	3.05259e-05		enhancer of mRNA decapping protein 4;Smp_130750	Putative uncharacterized protein [Source:UniProtKB/TrEMBL;Acc:G4VSM0]	gi|45827771|ref|NP_055144.3|	enhancer of mRNA-decapping protein 4 [Homo sapiens]
SmVG_024852:Smp_199990	24.5708	17.2647	17.2798	20.5194	9.4549	6.40348	15.068	6.33972	-1.09553	5e-05	0.000181778	26.1017	39.276	27.4296	30.7249	10.2679	20.0106	7.25743	8.87741	-0.785939	0.000254674	0.000862756	15.8849	22.9064	15.9877	17.5214	5.13949	11.275	4.00032	4.96822	-1.00658	9.21484e-06	3.05259e-05		enhancer of mRNA decapping protein 4;Smp_199990	Serine/threonine kinase [Source:UniProtKB/TrEMBL;Acc:G4VSL9]	gi|45827771|ref|NP_055144.3|	enhancer of mRNA-decapping protein 4 [Homo sapiens]
SmVG_008518:Smp_170960	5.42356	5.48398	3.99013	4.64347	2.31598	2.33357	2.54772	1.95248	-1.09471	5e-05	0.000181778	6.63086	7.20945	5.43635	5.8186	2.1734	2.59813	1.69733	2.16083	-0.811167	1.17794e-14	1.62524e-13	4.18023	4.34792	3.2521	3.47149	1.1206	1.50727	0.943297	1.18884	-1.14476	3.1862e-13	2.67652e-12		serine rich repeat protein;Smp_170960	Putative serine-rich repeat protein [Source:UniProtKB/TrEMBL;Acc:G4VDT9]	_	_
[truncated: 1,769 more rows]
