# Supplementary material for: Pharmacological inhibition of lysine-specific demethylase 1 (LSD1) induces global transcriptional deregulation and ultrastructural alterations that impair viability in Schistosoma mansoni
Source: PLoS Negl Trop Dis. 2020 Jul 1;14(7):e0008332. doi: 10.1371/journal.pntd.0008332 (PMC7329083; doi:10.1371/journal.pntd.0008332)
Supplement: S6 Table — (XLSX) [file pntd.0008332.s014.xlsx]

## Sheet: Schistosomula_Down
List of downregulated genes_Schistosomula
geneID	fpkm-control_1-cuffquant	fpkm-control_0-cuffquant	fpkm-control_2-cuffquant	fpkm-control_3-cuffquant	fpkm-treated_3-cuffquant	fpkm-treated_0-cuffquant	fpkm-treated_2-cuffquant	fpkm-treated_1-cuffquant	log2(fold_change)-cuffdiff	p-value-cuffdiff	q-value-cuffdiff	tpm-control1-kallisto	tpm-control2-kallisto	tpm-control3-kallisto	tpm-control4-kallisto	tpm-treated1-kallisto	tpm-treated2-kallisto	tpm-treated3-kallisto	tpm-treated4-kallisto	b-sleuth	p-value-sleuth	q-value-sleuth	TPM-control1-sailfish	TPM-control2-sailfish	TPM-control3-sailfish	TPM-control4-sailfish	TPM-treated1-sailfish	TPM-treated2-sailfish	TPM-treated3-sailfish	TPM-treated4-sailfish	log2FC-edgeR	p-value-edgeR	q-value-edgeR	GO_terms	product_description	swissProtAnnotationOfSMansoniGene	humanHomologous-hit	humanHomologous-hitDescription
Smp_169190	86.6933	188.926	25.0733	45.6681	9.62143	10.5546	2.64109	8.75944	-3.45535	5e-05	0.0017469	219.715	87.7852	24.7958	36.928	9.7318	8.584	2.26581	6.14744	-2.20886	2.67946e-05	0.00218828	135.8	51.8245	16.3095	21.5065	5.97267	5.31819	1.5034	3.46935	-3.39868	1.09608e-08	1.53873e-06	GO:0005509,GO:0005875,GO:0007017,GO:0030286	tegument-allergen-like protein;note=pfam_scan%3BPfam:PF01221.13%3B%3BE()%3D2.7E-8%3Bscore%3D33.5%3Bque ry 99-174%3Bdescription%3DDynein_light;Smp_169190	Putative tegumental protein; Tegumental allergen-like protein [Source:UniProtKB/TrEMBL;Acc:C1M053]	_	_
Smp_137720	11.4302	19.3839	12.91	11.1464	2.23923	2.30434	0.549073	2.43309	-2.86613	5e-05	0.0017469	50.1387	34.5208	31.0238	26.5752	5.32402	5.8274	2.80433	4.43113	-1.85713	2.93976e-25	1.84867e-21	39.7599	26.0258	24.9048	20.287	4.53539	4.66856	2.044	2.64867	-2.69703	7.64571e-28	2.32557e-24		hypothetical protein;Smp_137720	Putative uncharacterized protein [Source:UniProtKB/TrEMBL;Acc:G4VBE1]	_	_
Smp_016490	53.88	59.4945	50.9342	48.5817	11.0972	6.22845	3.68298	8.80155	-2.83623	5e-05	0.0017469	86.9324	70.1644	69.2068	52.1299	8.1505	13.366	4.3435	9.57314	-1.93186	5.21528e-15	3.64403e-12	55.3062	42.9608	45.9701	31.1762	5.11797	8.73181	2.68114	5.40606	-2.67188	1.75434e-20	1.14346e-17		Saposin B domain containing protein;Smp_016490	Putative uncharacterized protein [Source:UniProtKB/TrEMBL;Acc:G4VHH3]	_	_
Smp_136730	27.6309	29.6829	18.5978	21.3029	4.51123	2.05812	1.89288	5.24999	-2.82571	5e-05	0.0017469	33.7052	25.9185	19.1405	17.7061	2.16136	4.95501	1.60808	3.27629	-1.95565	5.24955e-13	2.87059e-10	20.7142	15.1115	12.3195	9.97076	1.28669	2.89336	0.910305	1.68297	-2.74677	1.15913e-17	5.28855e-15	GO:0004190,GO:0005615,GO:0005764,GO:0006508,GO:0008233,GO:0016787,GO:0030163	cathepsin d (lysosomal aspartyl protease);Smp_136730	Subfamily A1A unassigned peptidase (A01 family) [Source:UniProtKB/TrEMBL;Acc:G4VFY7]	gi|4503143|ref|NP_001900.1|	cathepsin D preproprotein [Homo sapiens]
Smp_123920	12.5819	15.9607	10.4988	8.22572	1.32894	2.29091	1.12668	2.13515	-2.78	5e-05	0.0017469	21.1621	14.2581	12.7938	8.31459	2.32785	1.83528	0.828198	0.907533	-2.05924	6.58643e-13	3.45157e-10	13.762	8.59103	7.9768	5.06832	1.37262	1.29814	0.501151	0.450356	-2.92139	9.90922e-18	4.75903e-15		hypothetical protein;note=tmhmm%3B%3Bquery 1-191%3B;Smp_123920	Putative uncharacterized protein [Source:UniProtKB/TrEMBL;Acc:G4V6W3]	_	_
Smp_194910	140.303	156.566	152.14	110.929	30.3757	18.1938	10.0368	23.3265	-2.77275	5e-05	0.0017469	167.813	127.459	130.394	80.2784	15.1396	19.9531	7.55279	16.8799	-1.98558	1.00987e-15	7.47123e-13	107.004	77.3669	86.6331	48.2138	9.54972	12.5166	4.65696	9.48097	-2.79501	2.2711e-23	2.07238e-20		Saposin B domain containing protein;Smp_194910	Putative uncharacterized protein [Source:UniProtKB/TrEMBL;Acc:G4VHH1]	_	_
Smp_130100	10.5207	11.0855	9.44019	6.84433	1.74937	2.37224	0.458599	1.25972	-2.69783	0.0028	0.0398095	17.517	15.5837	13.7184	8.92046	2.71498	2.43301	1.04735	1.83288	-1.79022	4.33443e-17	4.95583e-14	10.6015	8.61062	8.42293	4.74017	1.50332	1.32068	0.676001	0.880121	-2.56625	1.61743e-24	2.10844e-21	GO:0001664,GO:0005737,GO:0008047,GO:0043085	saposin containing protein;Smp_130100	Saposin containing protein [Source:UniProtKB/TrEMBL;Acc:G4VBU4]	_	_
Smp_139160	313.017	355.578	273.706	265.68	59.5231	52.0983	23.9191	51.4186	-2.6918	5e-05	0.0017469	546.807	396.571	346.598	251.776	54.7166	59.9499	25.3722	43.6222	-1.95847	1.21723e-21	5.10304e-18	347.825	235.969	227.505	146.528	33.7827	37.3343	15.5604	23.5717	-2.78884	4.68292e-31	4.27317e-27	GO:0004197,GO:0005615,GO:0005764,GO:0006508,GO:0008233,GO:0008234,GO:0016787,GO:0051603	SmCL2 peptidase (C01 family);Smp_139160	SmCL2-like peptidase (C01 family) [Source:UniProtKB/TrEMBL;Acc:G4LUV1]	gi|22202619|ref|NP_666023.1|	cathepsin L1 preproprotein [Homo sapiens]
Smp_181070	5.46353	8.2988	7.14488	6.33805	1.73897	0.745788	0.695145	1.09551	-2.67187	5e-05	0.0017469	15.851	12.1278	14.4176	12.5632	1.73859	2.2113	1.12974	2.23263	-1.86924	3.26439e-19	4.5618e-16	10.0478	7.19476	9.22208	7.22727	1.03621	1.35929	0.657191	1.1877	-2.66419	1.29411e-23	1.31208e-20		hypothetical protein;Smp_181070	Putative uncharacterized protein [Source:UniProtKB/TrEMBL;Acc:G4VC40]	_	_
Smp_202610	47.011	58.4696	42.528	32.9681	10.3142	5.89272	3.09572	9.93021	-2.63014	5e-05	0.0017469	58.4947	38.2827	35.4832	22.2651	5.04161	8.51483	1.97511	4.74687	-1.88449	1.46078e-09	4.27262e-07	38.0432	24.6124	23.6977	13.6584	3.12735	5.39223	1.1891	2.75639	-2.66084	4.90305e-14	1.39814e-11	GO:0001664,GO:0005737,GO:0008047,GO:0043085	hypothetical protein;note=iprscan%3BInterPro:IPR011001 : Saposin-like%3BSuperfamily:SSF47862%3B%3Bscore%3D1.5E-14%3Bquery 39-118%3Bdescription%3DSaposin-like;note=iprscan%3BPANTHER:PTHR11480%3B%3Bscore%3D7.8E-6%3Bquery 42-121%3Bdescription%3Dnull;Smp_202610	Putative uncharacterized protein Smp_202610 [Source:UniProtKB/TrEMBL;Acc:G4VHH2]	_	_
Smp_123880	28.0709	28.4825	21.7119	23.2738	4.07193	5.18541	2.24779	5.11996	-2.6106	5e-05	0.0017469	44.8243	33.3376	24.8273	20.6119	5.45814	4.92598	2.21086	3.15388	-1.88675	2.17231e-21	6.83028e-18	28.7724	20.5624	16.7893	12.2226	4.06	3.32829	1.62026	2.01218	-2.53761	6.45049e-21	4.90506e-18	GO:0016020,GO:0016021	hypothetical protein;Smp_123880	Putative uncharacterized protein [Source:UniProtKB/TrEMBL;Acc:G4V6W8]	_	_
SmVG_014953:Smp_075800	110.399	107.618	103.902	95.454	20.722	15.5508	9.81495	23.9849	-2.57441	5e-05	0.0017469	255.41	211.396	191.52	145.277	25.758	38.9192	13.925	24.8193	-1.92674	5.05388e-20	9.13152e-17	156.395	121.285	119.565	80.5751	15.1149	22.5515	7.95725	12.685	-2.71359	1.41875e-27	3.23653e-24		hemoglobinase (C13 family);Smp_075800	Hemoglobinase [Source:UniProtKB/Swiss-Prot;Acc:P09841]	gi|56682964|ref|NP_001008530.1|	legumain preproprotein [Homo sapiens]
SmVG_014953:Smp_179170	110.399	107.618	103.902	95.454	20.722	15.5508	9.81495	23.9849	-2.57441	5e-05	0.0017469	255.41	211.396	191.52	145.277	25.758	38.9192	13.925	24.8193	-1.92674	5.05388e-20	9.13152e-17	156.395	121.285	119.565	80.5751	15.1149	22.5515	7.95725	12.685	-2.71359	1.41875e-27	3.23653e-24		hemoglobinase (C13 family);Smp_179170
SmVG_001798	2.93586	4.8087	2.69066	1.74861	0.900546	0.579214	0.231198	0.462594	-2.48684	5e-05	0.0017469	31.9883	18.3105	15.0985	8.04855	3.56785	2.51442	1.74491	2.56059	-1.7049	2.64914e-10	9.00492e-08	19.5948	10.5557	9.52599	4.52279	2.07972	1.42795	0.963882	1.34273	-2.53596	7.61887e-15	2.5749e-12
Smp_172590	90.9638	105.438	88.7162	82.7931	23.7947	14.833	10.4943	19.5053	-2.4225	5e-05	0.0017469	127.884	94.4704	84.4053	64.6149	13.5132	18.5924	8.11718	13.5564	-1.77225	1.53215e-20	3.85397e-17	76.4003	53.3561	51.8416	35.5545	7.84669	10.7506	4.57164	6.75002	-2.51645	1.14952e-28	5.2447e-25	GO:0004180,GO:0004185,GO:0006508,GO:0008233,GO:0016787,GO:0051603	family S10 unassigned peptidase (S10 family);Smp_172590	Family S10 unassigned peptidase (S10 family) [Source:UniProtKB/TrEMBL;Acc:G4VHZ1]	gi|119395729|ref|NP_000299.2|	lysosomal protective protein isoform a precursor [Homo sapiens]
Smp_128940	2.43933	3.0563	2.40575	2.86204	0.56268	0.3938	0.364248	0.702202	-2.41162	0.0003	0.00788397	3.32903	2.35849	2.01318	2.1417	0.341277	0.609472	0.262623	0.312897	-1.71155	2.32628e-16	2.25059e-13	2.0319	1.34346	1.26769	1.21432	0.200502	0.356298	0.149938	0.161417	-2.47198	1.71874e-19	1.04557e-16	GO:0004871,GO:0004930,GO:0005886,GO:0005887,GO:0007165,GO:0007186,GO:0007196,GO:0008066,GO:0016020,GO:0016021,GO:0042734,GO:0051966	metabotropic glutamate receptor;Smp_128940	Putative metabotropic glutamate receptor [Source:UniProtKB/TrEMBL;Acc:G4V9E9]	gi|4504141|ref|NP_000832.1|	metabotropic glutamate receptor 4 precursor [Homo sapiens]
Smp_014570.2	70.9317	78.4994	63.7709	71.1739	20.0569	10.8897	8.48306	14.4384	-2.4003	5e-05	0.0017469	169.844	119.049	91.6487	87.4111	14.8588	19.4756	9.27445	17.4387	-1.86569	2.26035e-18	2.84284e-15	102.059	67.5573	56.5923	48.0253	8.52377	11.1052	5.15128	8.72775	-2.65915	6.25336e-25	9.51032e-22		Saposin%2CIPR008139 Saposin;note=iprscan%3BInterPro:IPR008138 : Saposin-like type B%2C 2%3BPfam:PF03489%3B%3Bscore%3D7.0E-6%3Bquery 81-115%3Bdescription%3DSaposin-like type B%2C 2;note=iprscan%3BInterPro:IPR011001 : Saposin-like%3BSuperfamily:SSF47862%3B%3Bscore%3D4.7E-10%3Bquery 129-201%3Bdescription%3DSaposin-like;note=iprscan%3BInterPro:IPR011001 : Saposin-like%3BSuperfamily:SSF47862%3B%3Bscor…
Smp_004420	3.85328	4.51397	5.07722	2.20898	0.925044	0.692459	0.399144	1.03329	-2.35963	5e-05	0.0017469	9.02244	6.29335	7.46047	3.24307	1.11456	1.26163	0.804867	0.834715	-1.64324	5.80839e-20	9.13152e-17	5.50194	3.6336	4.67674	1.80042	0.65241	0.734396	0.456	0.424066	-2.45265	3.11717e-18	1.77776e-15	GO:0016020,GO:0016021	hypothetical protein;Smp_004420	Putative uncharacterized protein [Source:UniProtKB/TrEMBL;Acc:G4LXI1]	_	_
Smp_103610	1114.3	1015.28	911.417	1192.63	295.878	180.716	126.836	222.561	-2.35769	5e-05	0.0017469	2160.3	1846.98	1344.35	1540.68	229.08	311.452	144.638	263.257	-1.82954	5.58258e-20	9.13152e-17	1558.23	1260.21	981.329	1000.15	158.948	213.377	96.4407	154.964	-2.60177	1.58732e-25	2.89687e-22	GO:0004197,GO:0005615,GO:0005764,GO:0006508,GO:0008233,GO:0008234,GO:0016787,GO:0050790,GO:0051603	cathepsin B peptidase (C01 family);Smp_103610	Cathepsin B-like cysteine proteinase [Source:UniProtKB/Swiss-Prot;Acc:P25792]	gi|22538431|ref|NP_680090.1|	cathepsin B preproprotein [Homo sapiens]
Smp_031180	20.5901	31.8631	22.0536	9.51372	4.67913	3.8873	3.43868	4.5791	-2.34093	5e-05	0.0017469	63.1036	39.7215	34.7032	12.3342	5.49026	7.08055	4.18839	4.82493	-1.62802	3.30802e-08	7.70461e-06	38.3502	22.7186	21.7063	6.94547	3.22928	4.17849	2.38797	2.43244	-2.49449	5.37546e-13	1.44268e-10	GO:0006629,GO:0008374,GO:0016740,GO:0016746	phospholipase A;Smp_031180	Phosphatidylcholine-sterol acyltransferase (Lecithin-cholesterol acyltransferase)/ Phospholipase A [Source:UniProtKB/TrEMBL;Acc:G4VPL2]	gi|6912484|ref|NP_036452.1|	group XV phospholipase A2 precursor [Homo sapiens]
Smp_132740	21.6209	35.4191	20.4697	12.9528	8.34668	3.12172	3.21931	3.21915	-2.33681	5e-05	0.0017469	44.6348	23.1814	21.1042	11.416	3.00029	3.68719	2.91428	5.1718	-1.65604	6.08799e-08	1.3673e-05	26.7523	13.0114	12.9213	6.22447	1.75181	2.13414	1.60724	2.58442	-2.40528	6.33e-11	1.20336e-08	GO:0005506,GO:0006629,GO:0006633,GO:0016020,GO:0016021,GO:0016213,GO:0016491,GO:0016717,GO:0020037,GO:0055114	fatty acid desaturase 2;Smp_132740	Fatty acid desaturase, putative [Source:UniProtKB/TrEMBL;Acc:G4LUC5]	gi|4758334|ref|NP_004256.1|	fatty acid desaturase 2 [Homo sapiens]
SmVG_008628	10.86	14.2421	5.84678	12.145	3.78648	1.96689	0.740962	2.10779	-2.32472	5e-05	0.0017469	17.3512	10.1985	6.00045	8.76364	1.57347	2.72708	0.77021	1.85534	-1.60102	2.29271e-07	4.57706e-05	10.7759	5.98887	3.82635	4.97083	1.06276	1.6121	0.443322	1.13154	-2.2025	4.35292e-08	5.29606e-06
Smp_070240	525.47	813.861	640.929	411.626	206.435	85.8396	105.333	87.3836	-2.30212	5e-05	0.0017469	1914.54	1193.53	1472.34	750.118	222.861	244.636	257.194	379.569	-1.36035	1.28696e-07	2.74342e-05	1172.73	693.828	940.245	425.019	135.167	146.323	149.817	199.988	-1.91206	1.79304e-10	3.2723e-08	GO:0016020,GO:0016021	venom allergen-like (VAL) 7 protein;Smp_070240
SmVG_029154	326.553	521.636	323.892	176.893	110.146	51.0736	64.0025	48.6608	-2.30023	5e-05	0.0017469	551.489	295.609	272.13	122.057	40.441	40.1805	46.5667	57.2801	-1.59277	1.13603e-07	2.46341e-05	365.961	187.37	187.508	76.6247	26.9946	26.3661	29.9359	33.9917	-2.36049	5.62252e-12	1.16603e-09	GO:0004869
Smp_187140	15.861	20.6102	19.5362	14.6156	5.12488	4.07896	1.7147	3.9501	-2.24787	5e-05	0.0017469	22.0402	14.0048	16.5434	10.5204	3.31122	3.33815	1.28213	2.60106	-1.63243	7.20824e-12	3.12614e-09	13.78	8.34918	10.6481	6.16541	2.01182	2.00927	0.804494	1.37798	-2.32786	1.33438e-16	5.7982e-14	GO:0004197,GO:0005615,GO:0005764,GO:0006508,GO:0008234,GO:0051603	cathepsin L proteinase;Smp_187140	Subfamily C1A non-peptidase homologue (C01 family) [Source:UniProtKB/TrEMBL;Acc:G4LUV4]	gi|22202619|ref|NP_666023.1|	cathepsin L1 preproprotein [Homo sapiens]
Smp_105450	118.354	142.791	70.5406	132.482	38.8976	31.2832	11.4309	19.7447	-2.19521	5e-05	0.0017469	659.92	532.487	373.084	524.627	96.09	110.607	60.5459	118.882	-1.50918	1.80584e-11	7.5707e-09	425.439	323.188	248.295	310.892	60.518	68.7861	37.5069	66.1609	-2.11969	9.32504e-16	3.40364e-13	GO:0001664,GO:0005737,GO:0006629,GO:0008047,GO:0043085	saposin containing protein;Smp_105450.2	Saposin containing protein [Source:UniProtKB/TrEMBL;Acc:G4VC39]	_	_
Smp_162770	110.897	137.478	77.8007	108.847	32.7063	23.5738	15.5513	24.1729	-2.17992	5e-05	0.0017469	176.359	120.166	78.0991	92.7692	22.203	23.1384	13.323	20.1527	-1.58266	1.32213e-16	1.3857e-13	108.161	69.9256	49.7873	52.7768	13.2847	13.8247	7.76229	10.5995	-2.29704	1.70661e-22	1.41571e-19	GO:0016020,GO:0016021	lysosome associated membrane glycoprotein;note=tmhmm%3B%3Bquery 1-349%3B;Smp_162770	Putative uncharacterized protein [Source:UniProtKB/TrEMBL;Acc:G4VS56]	_	_
Smp_085010	49.7666	51.0373	42.7223	45.9328	17.1826	8.61159	6.89484	10.0925	-2.14682	5e-05	0.0017469	57.1654	49.1375	37.748	33.2279	8.01644	8.78711	5.08136	9.29263	-1.55674	3.62816e-16	3.25938e-13	37.2668	30.4907	25.587	20.549	5.1762	5.63177	3.22283	5.48811	-2.21562	3.88486e-18	2.08526e-15	GO:0004197,GO:0005615,GO:0005764,GO:0006508,GO:0008234,GO:0016787,GO:0051603	cathepsin B peptidase (C01 family);Smp_085010	Cathepsin B-like peptidase (C01 family) [Source:UniProtKB/TrEMBL;Acc:G4V5D3]	gi|224586907|ref|NP_055279.3|	tubulointerstitial nephritis antigen [Homo sapiens]
Smp_105420	1286.29	1257.73	1162.04	1595.8	503.665	243.877	159.103	293.523	-2.14326	5e-05	0.0017469	1417.56	1233.25	1074.01	1214.53	209.898	271.016	126.447	288.009	-1.56664	5.4217e-11	2.06632e-08	880.391	727.211	691.971	700.349	129.499	164.075	74.3775	154.401	-2.16784	1.26189e-14	4.11239e-12	GO:0001664,GO:0005737,GO:0006629,GO:0008047,GO:0043085	Saposin%2CIPR008139 Saposin;Smp_105420	Saposin containing protein [Source:UniProtKB/TrEMBL;Acc:G4VC43]	_	_
Smp_083430	3.27901	3.31476	4.40139	4.01906	1.44089	0.811429	0.281096	0.872412	-2.14025	5e-05	0.0017469	3.2815	2.64348	3.29697	2.65318	0.579462	0.700203	0.178926	0.645071	-1.63163	4.04071e-07	7.47353e-05	2.03144	1.58447	2.07813	1.49453	0.379246	0.384784	0.103317	0.336803	-2.28028	3.44381e-12	7.48208e-10		hypothetical protein;Smp_083430	Putative uncharacterized protein [Source:UniProtKB/TrEMBL;Acc:G4LXJ0]	_	_
Smp_028870	20.4318	23.9261	18.3385	25.9083	8.17341	4.84003	2.48073	5.97096	-2.04539	5e-05	0.0017469	52.5399	40.9305	32.8923	34.8375	7.23196	8.92946	3.72535	7.93459	-1.6168	5.06187e-13	2.87059e-10	31.3067	23.3565	20.2071	19.265	4.55245	5.74653	2.27303	4.23478	-2.16528	2.01286e-16	7.98582e-14	GO:0001664,GO:0005737,GO:0008047,GO:0043085	Zinc finger%2C C2H2 type domain containing protein;Smp_028870	Putative uncharacterized protein [Source:UniProtKB/TrEMBL;Acc:G4VBD6]	_	_
SmVG_030160:Smp_166530	23.1184	22.0074	20.2097	22.0939	6.15966	5.11466	2.93802	7.23898	-2.02705	5e-05	0.0017469	28.7219	24.7429	20.0614	18.5783	4.87876	7.01114	2.50376	3.64727	-1.51803	5.993e-16	4.71087e-13	17.1839	13.9125	12.4086	10.1783	2.84159	4.02982	1.43274	1.81881	-2.13399	9.62286e-21	6.75451e-18		phospholipase A;Smp_166530	Phosphatidylcholine-sterol acyltransferase (Lecithin-cholesterol acyltransferase)/ Phospholipase A [Source:UniProtKB/TrEMBL;Acc:C4QJA6]	gi|4557892|ref|NP_000220.1|	phosphatidylcholine-sterol acyltransferase precursor [Homo sapiens]
SmVG_030160:Smp_166530.2	23.1184	22.0074	20.2097	22.0939	6.15966	5.11466	2.93802	7.23898	-2.02705	5e-05	0.0017469	28.7219	24.7429	20.0614	18.5783	4.87876	7.01114	2.50376	3.64727	-1.51803	5.993e-16	4.71087e-13	17.1839	13.9125	12.4086	10.1783	2.84159	4.02982	1.43274	1.81881	-2.13399	9.62286e-21	6.75451e-18		phospholipase A;Smp_166530.2
SmVG_030160:Smp_166540	23.1184	22.0074	20.2097	22.0939	6.15966	5.11466	2.93802	7.23898	-2.02705	5e-05	0.0017469	28.7219	24.7429	20.0614	18.5783	4.87876	7.01114	2.50376	3.64727	-1.51803	5.993e-16	4.71087e-13	17.1839	13.9125	12.4086	10.1783	2.84159	4.02982	1.43274	1.81881	-2.13399	9.62286e-21	6.75451e-18		serine:threonine protein kinase Nek11;note=pfam_scan%3BPfam:PF00069.20%3B%3BE()%3D2.0E-45%3Bscore%3D154.8%3Bq uery 33-207%3Bdescription%3DPkinase;Smp_166540	Kinase [Source:UniProtKB/TrEMBL;Acc:C4QJA8]	gi|225637560|ref|NP_079076.3|	serine/threonine-protein kinase Nek11 isoform 1 [Homo sapiens]
Smp_010550	2915.41	3967.81	3171.52	1773.41	1081.65	580.4	688.843	627.647	-1.98955	5e-05	0.0017469	5018.27	3212.16	3343.39	1570.18	597.261	649.937	612.279	719.495	-1.35901	7.31316e-10	2.29944e-07	3198.84	1933.32	2201.98	924.165	373.687	401.445	368.207	383.741	-1.99161	1.63175e-14	5.1344e-12		hypothetical protein;note=tmhmm%3B%3Bquery 1-173%3B;Smp_010550	Putative uncharacterized protein [Source:UniProtKB/TrEMBL;Acc:G4VMN2]	_	_
Smp_140610	13.8714	13.2533	13.9927	10.3335	4.37995	3.59995	2.30969	2.86926	-1.96716	5e-05	0.0017469	24.6651	20.8954	19.9559	12.5285	3.7569	3.35844	2.62015	3.4869	-1.57783	1.8535e-25	1.84867e-21	14.7361	11.7248	12.3491	6.86561	2.14979	1.95608	1.495	1.75614	-2.28879	7.72696e-24	8.81357e-21	GO:0003993,GO:0016311,GO:0016787,GO:0046872	iron:zinc purple acid phosphatase protein;Smp_140610	Acid phosphatase-related [Source:UniProtKB/TrEMBL;Acc:C4Q6M8]	gi|228008321|ref|NP_001004318.2|	iron/zinc purple acid phosphatase-like protein precursor [Homo sapiens]
Smp_067060	904.867	814.699	949.607	1233.96	389.894	204.203	145.662	264.948	-1.95786	5e-05	0.0017469	1412.28	1363.27	1248.33	1437.05	250.756	356.568	158.87	323.151	-1.48023	6.34141e-11	2.34576e-08	1143.28	1031.31	967.359	1013.91	179.284	256.176	112.532	194.946	-2.16143	1.47243e-16	6.10724e-14	GO:0004197,GO:0005615,GO:0005764,GO:0006508,GO:0008233,GO:0008234,GO:0016787,GO:0050790,GO:0051603	cathepsin B peptidase (C01 family);Smp_067060	Cathepsin B-like peptidase (C01 family) [Source:UniProtKB/TrEMBL;Acc:G4V5C2]	gi|224586907|ref|NP_055279.3|	tubulointerstitial nephritis antigen [Homo sapiens]
Smp_032980	21.8763	36.1989	9.82827	14.6471	6.77237	8.95672	2.03285	3.82238	-1.93529	0.0001	0.00315175	50.3905	27.7117	9.77393	16.1323	12.121	3.36721	2.63275	3.73103	-1.3415	0.00184754	0.0392631	31.5334	15.9794	6.16859	8.97121	7.08461	1.97726	1.52934	1.91699	-1.95368	0.000330795	0.00796254	GO:0005509	calmodulin protein;Smp_032980	Putative uncharacterized protein [Source:UniProtKB/TrEMBL;Acc:G4VR88]	_	_
Smp_020080	5.15142	6.55398	3.86994	4.48026	1.487	1.07431	1.31536	1.45301	-1.91188	5e-05	0.0017469	12.7362	10.4207	7.55347	5.65262	2.0439	2.32453	1.97011	1.43167	-1.33646	5.37338e-16	4.5054e-13	7.74861	6.10248	4.80405	3.24549	1.2228	1.37092	1.14056	0.729032	-1.9983	9.42541e-18	4.75903e-15	GO:0000166,GO:0001664,GO:0003924,GO:0004871,GO:0005525,GO:0005834,GO:0006184,GO:0007165,GO:0007186,GO:0007188,GO:0019001,GO:0031683	GTP binding protein (I) alpha subunit alpha;Smp_020080	Putative gtp-binding protein (I) alpha-1subunit, gnai1 [Source:UniProtKB/TrEMBL;Acc:G4V8F6]	gi|4504051|ref|NP_002064.1|	guanine nucleotide-binding protein G(z) subunit alpha [Homo sapiens]
Smp_074430	13.6163	16.3334	19.8107	17.1756	7.04641	2.92403	3.27602	4.99102	-1.87588	5e-05	0.0017469	15.2194	11.3374	15.8074	10.3412	2.73708	3.97455	2.82713	4.05524	-1.16302	1.77081e-09	5.0617e-07	12.2461	7.99475	11.5154	7.41003	2.00407	2.73876	2.16998	2.26798	-1.7496	6.77954e-13	1.76752e-10	GO:0016020,GO:0016021	hypothetical protein;Smp_074430	Putative uncharacterized protein [Source:UniProtKB/TrEMBL;Acc:G4VLD1]	_	_
Smp_139240	12.0759	13.4826	12.9706	11.2497	5.01506	2.25409	3.11125	3.19512	-1.87452	5e-05	0.0017469	14.3237	11.1319	11.1838	8.67044	2.10409	2.81944	2.28406	2.70538	-1.3204	4.94135e-12	2.39028e-09	9.2347	6.75851	7.39794	5.16192	1.44521	2.04971	1.50628	1.49109	-1.80715	5.19523e-15	1.82333e-12	GO:0004197,GO:0005615,GO:0005764,GO:0006508,GO:0008234,GO:0016020,GO:0016021,GO:0051603	cathepsin S (C01 family);Smp_139240	Peptidase C1 family [Source:UniProtKB/TrEMBL;Acc:G4LUT7]	gi|23110962|ref|NP_004070.3|	cathepsin S isoform 1 preproprotein [Homo sapiens]
SmVG_011925:Smp_138260	5.86156	8.30645	4.32429	3.89269	2.33067	1.21836	1.51979	1.13823	-1.85055	5e-05	0.0017469	16.483	9.42893	7.93016	5.85002	2.29035	2.48313	2.29051	2.33035	-1.19955	4.2963e-11	1.68858e-08	9.95101	5.38023	4.9412	3.23894	1.31786	1.42952	1.27943	1.16697	-1.79034	3.08251e-12	6.86047e-10		hypothetical protein;Smp_138260	Putative uncharacterized protein [Source:UniProtKB/TrEMBL;Acc:G4VFH4]	_	_
SmVG_011925:Smp_138270	5.86156	8.30645	4.32429	3.89269	2.33067	1.21836	1.51979	1.13823	-1.85055	5e-05	0.0017469	16.483	9.42893	7.93016	5.85002	2.29035	2.48313	2.29051	2.33035	-1.19955	4.2963e-11	1.68858e-08	9.95101	5.38023	4.9412	3.23894	1.31786	1.42952	1.27943	1.16697	-1.79034	3.08251e-12	6.86047e-10		diaminopimelate epimerase DafE;Smp_138270
Smp_172180	1869.76	2550.33	2157.01	1398.47	880.977	415.542	512.922	420.609	-1.83851	5e-05	0.0017469	2747.13	1771.91	1970.64	1063.57	363.578	377.171	392.557	510.18	-1.28675	5.98562e-09	1.53635e-06	1731.38	1045.14	1263.87	608.717	216.221	223.301	226.819	260.736	-1.84084	1.54932e-12	3.79257e-10		MEG-8 family;note=tmhmm%3B%3Bquery 1-141%3B;Smp_172180	MEG-8 family [Source:UniProtKB/TrEMBL;Acc:G4VLP3]	_	_
SmVG_023113:Smp_142970	15.4359	20.0306	15.8046	10.1437	8.01952	2.83588	3.75961	3.36753	-1.77199	5e-05	0.0017469	26.5252	17.7493	18.999	10.2201	3.2842	4.35273	3.88546	5.87567	-1.24197	9.52257e-07	0.000146055	16.1286	10.161	11.8706	5.6854	1.90206	2.54581	2.21096	3.00569	-1.75778	2.89285e-09	4.39954e-07		palmitoyl protein thioesterase 1;Smp_142970	Putative palmitoyl-protein thioesterase [Source:UniProtKB/TrEMBL;Acc:G4VNU1]	gi|4506031|ref|NP_000301.1|	palmitoyl-protein thioesterase 1 isoform 1 precursor [Homo sapiens]
SmVG_023113:Smp_142980	15.4359	20.0306	15.8046	10.1437	8.01952	2.83588	3.75961	3.36753	-1.77199	5e-05	0.0017469	26.5252	17.7493	18.999	10.2201	3.2842	4.35273	3.88546	5.87567	-1.24197	9.52257e-07	0.000146055	16.1286	10.161	11.8706	5.6854	1.90206	2.54581	2.21096	3.00569	-1.75778	2.89285e-09	4.39954e-07		palmitoyl protein thioesterase;Smp_142980	Putative palmitoyl-protein thioesterase [Source:UniProtKB/TrEMBL;Acc:G4VNU2]	gi|4506031|ref|NP_000301.1|	palmitoyl-protein thioesterase 1 isoform 1 precursor [Homo sapiens]
SmVG_020438	12.5267	13.9125	10.4941	8.54104	4.63268	3.15571	2.65837	3.07508	-1.74976	5e-05	0.0017469	12.0142	9.15914	7.36223	5.26367	2.47785	1.78296	1.7776	2.06899	-1.22055	3.02604e-13	1.90292e-10	10.2471	7.3252	6.61975	4.11399	1.87122	1.6661	1.29203	1.35805	-1.83523	4.0014e-16	1.52136e-13
Smp_077610	9.01295	8.75408	11.8301	7.97296	3.57773	1.59308	3.06148	3.08087	-1.73158	5e-05	0.0017469	12.065	9.18685	11.353	6.40884	1.59801	2.90631	2.27797	2.01773	-1.29753	7.14003e-12	3.12614e-09	7.96142	5.63318	7.66449	4.06725	1.06604	1.91129	1.33777	1.15172	-1.89677	3.15592e-14	9.2896e-12	GO:0016020,GO:0016021	hypothetical protein;Smp_077610	Putative uncharacterized protein [Source:UniProtKB/TrEMBL;Acc:G4VL55]	_	_
Smp_126120	6.80297	6.72195	8.88689	3.73606	2.09655	1.35368	2.02453	2.85383	-1.65055	5e-05	0.0017469	16.3784	13.4449	16.6989	6.0765	3.22	5.27672	3.13998	2.94473	-1.07264	6.2822e-07	0.000106772	9.6013	7.35312	9.93567	3.23717	1.80164	2.98636	1.70732	1.44219	-1.59269	1.21317e-09	1.94214e-07		LAMA protein 2;Smp_126120	Putative uncharacterized protein [Source:UniProtKB/TrEMBL;Acc:G4VB02]	gi|229093316|ref|NP_775813.2|	putative phospholipase B-like 2 isoform 1 precursor [Homo sapiens]
Smp_142490	7.59764	6.60982	5.09977	4.22901	3.2678	0.950315	1.54098	1.80175	-1.63826	5e-05	0.0017469	11.9701	10.409	7.51316	5.2334	1.7864	2.22049	1.64585	2.58437	-1.22282	7.30809e-09	1.83828e-06	7.2397	5.69864	4.44447	2.68066	1.07688	1.1934	0.853621	1.19565	-1.77	3.76365e-09	5.53924e-07	GO:0016020,GO:0016021	Transmembrane protein 45B;Smp_142490	Epididymal membrane protein E9-related [Source:UniProtKB/TrEMBL;Acc:G4VE75]	gi|20270331|ref|NP_620143.1|	transmembrane protein 45B [Homo sapiens]
SmVG_022140:Smp_152940	5.28026	6.88386	4.68268	3.18782	2.36155	1.58086	1.10999	1.4993	-1.61255	5e-05	0.0017469	8.61316	6.04251	4.74609	2.70568	1.66365	1.83125	1.4486	1.6176	-0.968876	1.41507e-06	0.000202242	4.80331	3.236	2.61949	1.35835	0.838286	0.851587	0.630768	0.713898	-1.60273	1.41957e-08	1.96266e-06		otopetrin;Smp_152940	Putative otopetrin [Source:UniProtKB/TrEMBL;Acc:G4VMW5]	_	_
SmVG_022140:Smp_152950	5.28026	6.88386	4.68268	3.18782	2.36155	1.58086	1.10999	1.4993	-1.61255	5e-05	0.0017469	8.61316	6.04251	4.74609	2.70568	1.66365	1.83125	1.4486	1.6176	-0.968876	1.41507e-06	0.000202242	4.80331	3.236	2.61949	1.35835	0.838286	0.851587	0.630768	0.713898	-1.60273	1.41957e-08	1.96266e-06		hypothetical protein;Smp_152950	Putative uncharacterized protein [Source:UniProtKB/TrEMBL;Acc:G4VMW4]	_	_
SmVG_030363	1.58702	1.89692	0.934703	1.26806	0.567351	0.379386	0.453484	0.537607	-1.55315	5e-05	0.0017469	6.69217	4.35392	3.72789	2.57318	0.928784	1.08114	0.892527	1.03875	-1.261	1.16727e-12	5.87232e-10	3.80678	2.32667	2.06065	1.3678	0.522571	0.653386	0.52532	0.480113	-1.77465	7.80336e-14	2.15775e-11
SmVG_019882	3.61036	4.19351	5.11199	3.10183	2.12197	0.944764	1.41086	1.00841	-1.54584	0.0002	0.0055642	10.4175	13.0576	14.5477	5.97036	4.23196	3.47807	3.53011	4.62836	-0.789243	0.000618945	0.0191736	8.73624	9.12732	12.1176	4.99744	2.90322	2.24133	2.57201	2.62704	-1.34567	2.08896e-06	0.000164326
Smp_171190	613.801	832.312	686.699	407.391	308.821	171.997	229.681	184.086	-1.50565	5e-05	0.0017469	1890.12	1266.68	1384.5	684.913	351.155	391.071	428.122	400.552	-0.950803	7.24996e-07	0.000115421	1162.63	734.208	878.062	388.676	210.585	235.551	249.71	209.899	-1.39644	2.83489e-10	4.70335e-08		MEG-8 family;Smp_171190	MEG-8 family [Source:UniProtKB/TrEMBL;Acc:G4VCW5]	_	_
Smp_158490	4.70581	6.82397	3.01174	2.74879	2.02034	1.86204	0.878675	1.36127	-1.49781	5e-05	0.0017469	8.06492	4.7363	3.03051	2.3301	1.87366	1.24307	0.888253	1.29532	-0.979264	0.000190197	0.00911741	5.04041	2.75824	1.92863	1.32049	1.11866	0.738014	0.512393	0.675381	-1.49912	2.31702e-05	0.00108984	GO:0003676,GO:0005622,GO:0008270,GO:0046872	Ras guanine nucleotide exchange factor RasGEFB;note=pfam_scan%3BPfam:PF13465.1%3B%3BE()%3D0.0050%3Bscore%3D16.9%3Bquer y 795-818%3Bdescription%3Dzf-H2C2_2;note=pfam_scan%3BPfam:PF13465.1%3B%3BE()%3D6.3E-8%3Bscore%3D32.4%3Bquer y 767-791%3Bdescription%3Dzf-H2C2_2;note=iprscan%3BInterPro:IPR007087 : Zinc finger%2C C2H2-type%3BPfam:PF00096%3B%3Bscore%3D1.6E-6%3Bquery 781-803%3Bdescription%3DZinc fin…	Putative ras guanine nucleotide exchange factor RasGEFB [Source:UniProtKB/TrEMBL;Acc:G4V6R8]	gi|74027274|ref|NP_001027544.1|	zinc finger protein 226 isoform a [Homo sapiens]
Smp_124520	15.9763	19.8216	19.0118	6.68164	3.54446	6.59726	6.35877	5.7254	-1.46814	5e-05	0.0017469	23.9801	17.1806	19.5795	5.56597	6.6533	6.04687	5.72054	2.49848	-0.924546	0.00216045	0.0427723	14.553	9.76135	12.2173	3.08904	3.91449	3.61583	3.57169	1.27064	-1.38784	2.19051e-05	0.00104106		hypothetical protein;Smp_124520	Putative uncharacterized protein [Source:UniProtKB/TrEMBL;Acc:G4LXH8]	_	_
Smp_163630	63.6824	73.5004	63.0849	61.9014	42.553	19.5849	17.0156	17.2943	-1.44268	5e-05	0.0017469	274.53	203.102	232.593	147.468	51.0714	57.3741	45.327	79.1006	-1.1204	3.37338e-07	6.42833e-05	250.405	164.543	194.737	110.637	37.3275	40.5527	34.0141	55.1244	-1.6886	1.44832e-09	2.27861e-07		developmentally regulated antigen 10;MEG-4 (10.3) family;Smp_163630.2	MEG-4 (10.3) family [Source:UniProtKB/TrEMBL;Acc:G4V7K7]	_	_
Smp_056990	51.4512	65.5214	38.5849	43.0316	29.5783	16.623	11.3277	16.324	-1.42706	5e-05	0.0017469	120.132	81.7054	53.4541	52.1075	26.6395	24.0513	13.7864	27.4361	-1.01096	3.15311e-05	0.00244429	76.166	49.2722	35.2924	30.8186	16.6442	14.8747	8.4065	15.0518	-1.43897	2.81266e-07	2.82039e-05	GO:0004970,GO:0005234,GO:0016020,GO:0016021,GO:0035235	thyroid receptor interacting protein 11;Smp_056990	Putative uncharacterized protein [Source:UniProtKB/TrEMBL;Acc:G4V5I7]	_	_
Smp_121950	6.84396	10.2371	9.15713	4.48935	2.55375	2.38049	3.77351	2.83871	-1.41208	5e-05	0.0017469	14.603	7.83637	9.27814	4.25322	2.63305	2.97473	3.40008	1.74587	-0.973651	5.7063e-06	0.000658423	8.99316	4.65242	5.8894	2.464	1.59749	1.84064	2.03221	0.914918	-1.45734	3.25229e-07	3.19109e-05		hypothetical protein;note=trans_spliced (SO:0000870);note=predicted by EVM2;Smp_121950	Putative uncharacterized protein [Source:UniProtKB/TrEMBL;Acc:G4VAU6]	_	_
SmVG_025638:Smp_102210	17.863	21.601	17.7705	13.4207	11.58	5.82571	3.8607	5.80665	-1.38394	0.00315	0.0430866	25.4299	17.9748	15.709	10.5418	4.8841	5.28983	2.92695	6.53121	-1.09319	1.58693e-05	0.00144629	17.6145	12.0235	12.1051	7.04865	3.54746	3.71989	2.22983	3.92834	-1.4569	4.31863e-08	5.29606e-06		lysosomal alpha mannosidase;Smp_102210	Putative uncharacterized protein [Source:UniProtKB/TrEMBL;Acc:G4VTI0]	_	_
SmVG_025638:Smp_131580	17.863	21.601	17.7705	13.4207	11.58	5.82571	3.8607	5.80665	-1.38394	0.00315	0.0430866	25.4299	17.9748	15.709	10.5418	4.8841	5.28983	2.92695	6.53121	-1.09319	1.58693e-05	0.00144629	17.6145	12.0235	12.1051	7.04865	3.54746	3.71989	2.22983	3.92834	-1.4569	4.31863e-08	5.29606e-06		lysosomal alpha mannosidase;Smp_131580	Putative lysosomal alpha-mannosidase (Mannosidase alpha class 2b member 1) [Source:UniProtKB/TrEMBL;Acc:G4VTI2]	gi|51477714|ref|NP_002363.2|	alpha-mannosidase 2 [Homo sapiens]
Smp_035560	71.317	74.5711	59.8032	90.3085	47.4591	22.5799	20.4795	23.4717	-1.37669	5e-05	0.0017469	172.206	140.191	116.696	142.599	39.6822	46.0381	30.9585	51.0764	-1.05341	1.93167e-08	4.76364e-06	104.064	79.893	71.1182	77.9143	22.7788	26.2248	17.1425	25.2144	-1.4853	6.17708e-11	1.19927e-08		hypothetical protein;Smp_035560.2	Putative uncharacterized protein [Source:UniProtKB/TrEMBL;Acc:G4V7P2]	_	_
Smp_131500	103.775	89.6971	88.1256	111.101	47.2833	39.1623	23.7506	42.1473	-1.3661	5e-05	0.0017469	118.007	115.307	91.3708	91.782	37.5127	40.675	19.8443	30.3363	-1.01768	1.42596e-10	4.98175e-08	72.9424	66.8359	58.129	51.6789	22.4308	24.0294	11.3308	15.6635	-1.44373	2.18365e-12	4.98145e-10	GO:0016020,GO:0016021	Transmembrane protein 60;note=pfam_scan%3BPfam:PF10269.4%3B%3BE()%3D5.9E-6%3Bscore%3D25.9%3Bquer y 7-98%3Bdescription%3DTmemb_185A;Smp_131500	Putative transmembrane protein 60 [Source:UniProtKB/TrEMBL;Acc:G4VTJ7]	gi|14269580|ref|NP_116325.1|	transmembrane protein 60 [Homo sapiens]
Smp_141680	13.5966	15.55	16.9228	6.92858	5.86946	5.19437	3.91885	5.83547	-1.3481	5e-05	0.0017469	19.4591	14.1372	16.96	5.92875	4.89618	5.66884	3.24458	3.49283	-0.94881	3.39297e-05	0.00258877	11.8834	8.177	10.6863	3.32911	2.89048	3.30604	1.84494	1.78027	-1.45707	2.4516e-07	2.53802e-05	GO:0005578,GO:0005615,GO:0007155,GO:0030198,GO:0050839	fasciclin domain containing protein;Smp_141680	Putative uncharacterized protein [Source:UniProtKB/TrEMBL;Acc:G4V6F1]	_	_
Smp_176100	3.69372	4.89444	6.60887	2.60623	1.71079	1.44699	2.50604	1.3777	-1.33818	5e-05	0.0017469	5.35529	3.57069	5.40855	2.71866	2.00145	1.68985	2.32151	1.53107	-0.616092	0.000399634	0.0145266	3.51009	2.3104	3.5455	1.49175	1.44294	1.09709	1.35392	0.813774	-0.853919	0.000602654	0.0118036	GO:0005385,GO:0005886,GO:0006812,GO:0008324,GO:0010043,GO:0016020,GO:0016021,GO:0016023,GO:0055085,GO:0061088,GO:0071577,GO:0098655	UDP glucose:glycoprotein glucosyltransferase;Smp_176100	Cation efflux protein/ zinc transporter,putative [Source:UniProtKB/TrEMBL;Acc:G4M1R4]	gi|21359890|ref|NP_037441.2|	zinc transporter 4 [Homo sapiens]
SmVG_024384:Smp_077330	4.36552	5.29059	2.58024	2.82601	2.01401	1.38654	0.950718	1.64557	-1.32867	5e-05	0.0017469	8.2864	5.22157	3.11603	3.16974	1.74063	1.69148	1.00212	1.37154	-0.998116	3.59312e-06	0.000438744	5.11839	3.17145	1.98138	1.83517	1.17658	1.1184	0.602485	0.782114	-1.39477	2.52787e-06	0.000192223		hypothetical protein;Smp_077330	Putative uncharacterized protein [Source:UniProtKB/TrEMBL;Acc:G4VTM9]	_	_
SmVG_024384:Smp_163810	4.36552	5.29059	2.58024	2.82601	2.01401	1.38654	0.950718	1.64557	-1.32867	5e-05	0.0017469	8.2864	5.22157	3.11603	3.16974	1.74063	1.69148	1.00212	1.37154	-0.998116	3.59312e-06	0.000438744	5.11839	3.17145	1.98138	1.83517	1.17658	1.1184	0.602485	0.782114	-1.39477	2.52787e-06	0.000192223		laminin gamma 1 chain;Smp_163810	Putative laminin gamma-1 chain [Source:UniProtKB/TrEMBL;Acc:G4VTM7]	gi|38788416|ref|NP_005550.2|	laminin subunit alpha-1 precursor [Homo sapiens]
SmVG_024384:Smp_187680	4.36552	5.29059	2.58024	2.82601	2.01401	1.38654	0.950718	1.64557	-1.32867	5e-05	0.0017469	8.2864	5.22157	3.11603	3.16974	1.74063	1.69148	1.00212	1.37154	-0.998116	3.59312e-06	0.000438744	5.11839	3.17145	1.98138	1.83517	1.17658	1.1184	0.602485	0.782114	-1.39477	2.52787e-06	0.000192223		hypothetical protein;note=tmhmm%3B%3Bquery 1-105%3B;note=%3Bquery 87-105%3B;note=%3Bquery 64-86%3B;note=%3Bquery 1-63%3B;Smp_187680	Putative uncharacterized protein [Source:UniProtKB/TrEMBL;Acc:G4VTM8]	_	_
Smp_203580	909.429	865.543	1226.35	719.041	519.041	355.887	234.109	379.11	-1.32193	5e-05	0.0017469	860.611	803.799	1078.12	503.714	286.681	320.363	168.513	273.248	-0.92597	1.09069e-05	0.00110626	519.361	489.238	727.797	305.874	184.348	203.396	104.474	157.188	-1.33163	2.68183e-08	3.49596e-06		hypothetical protein;Smp_203580
Smp_050520	16.9897	22.2019	17.9157	11.2959	8.72136	7.83357	4.45119	6.71288	-1.30319	5e-05	0.0017469	28.2281	18.2036	18.6255	9.31207	7.51307	6.70472	3.88826	5.54334	-0.9339	1.56138e-05	0.00143339	16.9211	10.2479	11.4518	5.07501	4.34417	3.83332	2.17643	2.76413	-1.374	1.7845e-07	1.93852e-05	GO:0005509,GO:0005515,GO:0007154,GO:0007275,GO:0016020,GO:0016021	neurogenic locus notch protein;Smp_050520	Notch [Source:UniProtKB/TrEMBL;Acc:G4VH90]	gi|134244285|ref|NP_000426.2|	neurogenic locus notch homolog protein 3 precursor [Homo sapiens]
Smp_212450	24.4792	17.955	22.0176	19.7928	16.9871	5.6751	4.79183	6.86185	-1.29571	5e-05	0.0017469	40.8434	43.1269	43.0181	32.1391	9.88049	9.17133	5.68819	18.4363	-1.19804	0.000189245	0.00911741	28.2865	27.6857	29.1075	19.6937	6.55378	6.069	3.79456	10.4506	-1.5052	4.5588e-05	0.00183256	GO:0016020,GO:0016021,GO:0016788	placental protein 11;Smp_212450	Putative uncharacterized protein [Source:UniProtKB/TrEMBL;Acc:G4LY12]	gi|289063433|ref|NP_001165910.1|	poly(U)-specific endoribonuclease isoform 1 precursor [Homo sapiens]
Smp_124000	485.398	615.786	589.353	359.279	296.28	167.733	199.67	177.194	-1.28553	5e-05	0.0017469	2497.55	1717.52	1970.54	941.517	492.971	527.217	498.735	565.075	-0.988021	3.10783e-07	6.01341e-05	1485.84	961.279	1193.67	513.13	281.652	298.42	276.408	281.229	-1.44808	2.5514e-10	4.47722e-08	GO:0016020,GO:0016021	MEG-14;note=tmhmm%3B%3Bquery 1-118%3B;Smp_124000	MEG-14 [Source:UniProtKB/TrEMBL;Acc:G4V6N9]	_	_
Smp_054350	4.69372	4.66565	4.4244	3.16117	2.34253	2.08342	1.36827	1.17115	-1.28258	5e-05	0.0017469	12.4423	9.04117	8.5325	5.14336	3.16674	3.01956	2.97752	2.71019	-0.871418	6.39737e-10	2.06307e-07	7.55125	5.18054	5.23731	3.02987	1.88476	1.79695	1.793	1.37921	-1.27006	1.11662e-09	1.81949e-07	GO:0000981,GO:0003677,GO:0003700,GO:0005634,GO:0006351,GO:0006355,GO:0006357,GO:0043565	Forkhead box protein D3;Smp_054350	Putative forkhead protein/ forkhead protein domain [Source:UniProtKB/TrEMBL;Acc:G4VQJ9]	_	_
Smp_008610	14.8291	15.6865	15.8911	13.6725	10.5066	3.59092	4.86951	5.82177	-1.27718	5e-05	0.0017469	19.2224	15.7525	15.9894	12.263	3.81063	5.8014	4.14499	7.46379	-0.935256	7.47623e-05	0.00447755	11.1658	8.59598	9.50355	6.43299	2.1887	3.23714	2.24098	3.56159	-1.25914	1.6759e-05	0.000812021	GO:0004531,GO:0005622,GO:0006259,GO:0006309	deoxyribonuclease ii;Smp_008610	Deoxyribonuclease II-related [Source:UniProtKB/TrEMBL;Acc:G4LWH7]	gi|194473657|ref|NP_067056.2|	deoxyribonuclease-2-beta isoform 1 precursor [Homo sapiens]
Smp_212710	5.24046	5.81182	5.71041	3.96422	3.45009	1.9109	1.64469	1.58456	-1.27074	5e-05	0.0017469	7.19257	5.30975	5.57677	3.39498	1.71487	1.47918	1.47161	1.93496	-0.978355	7.1239e-08	1.57188e-05	4.43892	3.09125	3.4759	1.93205	1.01254	0.883981	0.856121	0.99265	-1.42222	3.66042e-08	4.57553e-06		gynecophoral canal protein%2C putative;Smp_212710	Putative gynecophoral canal protein [Source:UniProtKB/TrEMBL;Acc:G4VG71]	gi|209862907|ref|NP_006466.2|	periostin isoform 1 [Homo sapiens]
Smp_154670	9.9969	9.07849	10.2476	10.1338	5.08059	4.09862	4.08111	3.13515	-1.26698	5e-05	0.0017469	9.63975	9.01982	8.77358	7.11794	3.48726	2.91557	3.0153	2.68025	-0.878255	1.26999e-09	3.80301e-07	5.85644	5.16912	5.52933	3.95055	2.06813	1.69279	1.72143	1.3549	-1.27724	1.57937e-12	3.79257e-10	GO:0003829,GO:0008109,GO:0008375,GO:0016020,GO:0016740,GO:0016757	glycosyltransferase 14 family member;Smp_154670	Putative glycosyltransferase 14 family member [Source:UniProtKB/TrEMBL;Acc:G4V6I1]	gi|21614523|ref|NP_001481.2|	beta-1,3-galactosyl-O-glycosyl-glycoprotein beta-1,6-N-acetylglucosaminyltransferase [Homo sapiens]
Smp_147460	12.0046	17.7956	12.7175	10.1663	6.05993	4.95777	5.014	6.02167	-1.25637	5e-05	0.0017469	28.4338	16.1322	13.6624	9.0736	5.68238	6.338	5.2534	4.26881	-0.89154	2.22034e-07	4.50407e-05	16.9862	9.21595	8.47345	4.99978	3.31758	3.66915	3.03471	2.18678	-1.3667	9.25138e-08	1.08229e-05	GO:0016787,GO:0017040	ceramidase;Smp_147460	Ceramidase [Source:UniProtKB/TrEMBL;Acc:G4VN86]	gi|221218981|ref|NP_063946.2|	neutral ceramidase isoform a [Homo sapiens]
Smp_075390	4.73162	5.6185	3.63537	3.81047	2.2601	1.86961	2.0396	1.30924	-1.25072	5e-05	0.0017469	5.4269	3.87423	3.23425	2.07327	1.5886	1.11259	1.05751	1.17859	-0.859839	4.43025e-05	0.003088	3.53837	2.40489	2.05624	1.5302	1.14297	0.762166	0.862241	0.678659	-1.14526	1.18003e-05	0.000626033		hypothetical protein;note=predicted by EVM2;Smp_075390	Putative uncharacterized protein [Source:UniProtKB/TrEMBL;Acc:G4LX26]	_	_
SmVG_019934	2.0409	2.29215	1.09965	1.533	1.22699	0.61657	0.499875	0.589097	-1.24812	5e-05	0.0017469	4.43046	3.42358	2.2308	1.86517	1.38038	1.12678	0.88598	1.1417	-0.758864	2.95939e-05	0.0023409	2.77962	2.00815	1.3743	1.04674	0.717574	0.573285	0.501135	0.568963	-1.24521	1.95274e-06	0.000156305
Smp_127460	2.30968	2.77659	1.16557	2.33135	1.03725	0.810856	0.365838	1.4198	-1.24006	0.00015	0.00443311	5.04476	4.21759	1.90566	2.4226	1.15441	1.5268	0.741274	1.02109	-0.899398	6.84764e-05	0.00428471	3.53876	2.75488	1.49574	1.61061	0.748489	0.981216	0.4317	0.53364	-1.49534	1.11428e-06	9.50261e-05		hypothetical protein;Smp_127460	Putative myosin heavy chain [Source:UniProtKB/TrEMBL;Acc:G4VEV4]	gi|110227629|ref|NP_060900.2|	translin-associated factor X-interacting protein 1 [Homo sapiens]
Smp_143680	5.24414	6.87474	2.85329	4.81877	3.35744	2.05843	1.16775	1.92637	-1.21761	5e-05	0.0017469	8.86509	5.71717	3.16475	4.08774	2.07152	2.01748	1.05003	2.23368	-0.887213	0.00126134	0.0311703	5.35071	3.24094	1.96801	2.25433	1.19939	1.16247	0.596908	1.11742	-1.28554	4.67531e-05	0.00186587		laminin subunit;Smp_143680	_	gi|28559088|ref|NP_000417.2|	laminin subunit alpha-2 isoform a precursor [Homo sapiens]
SmVG_007521:Smp_098020	14.0481	17.5849	11.585	10.3017	7.49153	5.19206	5.37954	5.029	-1.21267	5e-05	0.0017469	56.3725	42.9691	48.2254	26.5949	15.6616	16.7391	17.6908	18.6399	-0.732945	2.24421e-05	0.00186923	34.2289	24.4017	30.1386	14.7753	9.34456	9.6953	10.0982	9.50111	-1.04728	2.47544e-07	2.53802e-05		hypothetical protein;Smp_098020	Putative uncharacterized protein [Source:UniProtKB/TrEMBL;Acc:C1M0Q8]	_	_
SmVG_007521:Smp_176020	14.0481	17.5849	11.585	10.3017	7.49153	5.19206	5.37954	5.029	-1.21267	5e-05	0.0017469	56.3725	42.9691	48.2254	26.5949	15.6616	16.7391	17.6908	18.6399	-0.732945	2.24421e-05	0.00186923	34.2289	24.4017	30.1386	14.7753	9.34456	9.6953	10.0982	9.50111	-1.04728	2.47544e-07	2.53802e-05		MEG 11;Smp_176020
SmVG_012696:Smp_018800	16.9298	18.693	15.7095	13.5265	8.97833	7.27019	5.48685	6.36678	-1.20662	5e-05	0.0017469	26.475	20.2143	18.569	12.8852	7.43368	7.15202	5.39536	6.21988	-0.904196	1.64146e-13	1.08656e-10	16.97	12.2042	11.464	7.47454	4.73581	4.35921	3.18597	3.2377	-1.29165	2.06601e-14	6.28412e-12		subfamily A1A unassigned peptidase (A01 family);Smp_018800	Subfamily A1A unassigned peptidase (A01 family) [Source:UniProtKB/TrEMBL;Acc:G4VG09]	gi|21040360|ref|NP_620476.1|	beta-secretase 2 isoform C preproprotein [Homo sapiens]
SmVG_012696:Smp_132470	16.9298	18.693	15.7095	13.5265	8.97833	7.27019	5.48685	6.36678	-1.20662	5e-05	0.0017469	26.475	20.2143	18.569	12.8852	7.43368	7.15202	5.39536	6.21988	-0.904196	1.64146e-13	1.08656e-10	16.97	12.2042	11.464	7.47454	4.73581	4.35921	3.18597	3.2377	-1.29165	2.06601e-14	6.28412e-12		subfamily A1A unassigned peptidase (A01 family);Smp_132470	Subfamily A1A unassigned peptidase (A01 family) [Source:UniProtKB/TrEMBL;Acc:G4VG10]	gi|4503143|ref|NP_001900.1|	cathepsin D preproprotein [Homo sapiens]
Smp_201330	13.6196	10.8634	13.1349	14.1369	6.21531	5.28296	5.5008	5.42871	-1.20641	5e-05	0.0017469	13.7042	13.2258	12.4961	11.6898	3.72213	5.1406	4.1812	3.87572	-0.931092	2.28266e-08	5.52097e-06	9.19326	8.69029	8.84131	7.28251	3.12489	3.32154	2.72404	2.08141	-1.31785	1.51741e-12	3.79257e-10		egg protein CP391S;Smp_201330	Putative uncharacterized protein Smp_201330 [Source:UniProtKB/TrEMBL;Acc:G4LV63]	_	_
SmVG_001558	1.45395	1.37274	1.10427	1.60266	0.471802	0.804933	0.304484	0.829764	-1.1986	0.00135	0.0235831	8.26754	5.94649	4.58531	4.96907	1.96229	2.16411	1.27054	1.17061	-1.12085	2.74187e-11	1.1124e-08	5.10467	3.36573	2.9638	2.93187	1.15492	1.33553	0.726027	0.639211	-1.64133	1.80739e-12	4.22883e-10
Smp_149870	56.7281	55.0969	44.387	39.02	34.6981	15.3874	16.5485	18.438	-1.19843	5e-05	0.0017469	109.463	86.697	72.1764	55.3202	23.1858	28.0453	19.0103	36.4669	-0.921661	4.66344e-05	0.00313961	72.1744	53.5226	46.827	32.3854	13.9297	17.1593	11.275	19.6618	-1.24744	1.09971e-05	0.000590286	GO:0008152,GO:0016787	cat eye syndrome critical region protein%3B cat eye syndrome candidate region protein;Smp_149870	Putative uncharacterized protein [Source:UniProtKB/TrEMBL;Acc:G4VI45]	gi|14861834|ref|NP_149061.1|	cat eye syndrome chromosome region, candidate 5 isoform 2 precursor [Homo sapiens]
Smp_202130	18.6621	21.0833	20.651	17.3867	16.2343	5.86106	6.34073	6.41791	-1.15813	0.0001	0.00315175	31.5634	22.7678	22.8354	19.551	6.56432	6.81737	6.99343	12.1154	-0.924073	0.000184774	0.0090424	17.9793	12.2202	13.0871	9.4808	3.34786	3.59074	3.71384	5.58198	-1.25729	7.43607e-05	0.00264588	GO:0005875,GO:0007017,GO:0016020,GO:0016021	hypothetical protein;note=tmhmm%3B%3Bquery 1-102%3B;note=%3Bquery 1-31%3B;note=%3Bquery 87-102%3B;note=%3Bquery 32-54%3B;note=%3Bquery 64-86%3B;note=%3Bquery 55-63%3B;Smp_202130	Putative uncharacterized protein Smp_202130 [Source:UniProtKB/TrEMBL;Acc:G4VFD6]	gi|18087855|ref|NP_542408.1|	dynein light chain 2, cytoplasmic [Homo sapiens]
Smp_125320	44.8409	50.6235	52.9273	37.0467	29.4053	14.8961	24.2831	14.8788	-1.15172	5e-05	0.0017469	345.877	246.786	319.265	161.339	82.9334	78.9982	99.4851	102.972	-0.875749	1.6912e-05	0.00151999	209.842	141.549	198.463	89.5845	48.7024	46.402	56.8704	52.4017	-1.24997	6.13069e-08	7.36086e-06		MEG-9;Smp_125320	MEG-9 [Source:UniProtKB/TrEMBL;Acc:G4V726]	_	_
Smp_042150	100.728	122.948	135.437	54.1173	55.681	43.3796	43.1013	44.7374	-1.14468	5e-05	0.0017469	137.913	98.2289	123.652	42.5975	37.8149	41.2351	34.441	31.7928	-0.750845	0.000500821	0.0166636	86.0389	58.2545	79.6909	24.7379	23.0465	25.101	20.173	17.4121	-1.1607	2.77341e-06	0.000207437	GO:0005509,GO:0005875,GO:0007017,GO:0030286	tegument-allergen-like protein;Smp_042150	Putative dynein light chain 1, cytoplasmic; Tegumental antigen [Source:UniProtKB/TrEMBL;Acc:G4VJT8]	_	_
Smp_012440	309.915	371.405	254.637	209.6	153.62	135.792	101.043	132.185	-1.13216	5e-05	0.0017469	373.565	261.662	203.861	137.669	103.249	106.638	68.7227	74.3713	-0.805767	8.8534e-07	0.000139186	225.94	149.526	127.2	76.4714	60.6003	61.8777	38.9113	37.742	-1.2108	8.19371e-09	1.16824e-06	GO:0005215,GO:0006810,GO:0016020,GO:0016021,GO:0022857,GO:0022891,GO:0055085	glucose transport protein;Smp_012440	Glucose transport protein; Putative glucose transport protein [Source:UniProtKB/TrEMBL;Acc:Q26579]	gi|4557851|ref|NP_000331.1|	solute carrier family 2, facilitated glucose transporter member 2 [Homo sapiens]
Smp_159490	2.34417	2.50518	2.21753	2.33562	1.57755	1.3285	0.752321	0.646905	-1.12694	0.0003	0.00788397	3.37408	2.8187	2.67142	2.18022	1.30234	0.825973	0.796891	0.983614	-0.869835	7.9878e-06	0.000881251	2.00231	1.55042	1.59257	1.14939	0.723355	0.456641	0.427785	0.470381	-1.2655	3.8847e-07	3.77105e-05	GO:0000139,GO:0005794,GO:0006486,GO:0016020,GO:0016021,GO:0016740,GO:0016757,GO:0030246	polypeptide GalNAc transferase 6;Smp_159490	Putative n-acetylgalactosaminyltransferase [Source:UniProtKB/TrEMBL;Acc:G4VQ97]	gi|194018457|ref|NP_001030017.2|	polypeptide N-acetylgalactosaminyltransferase-like 6 [Homo sapiens]
Smp_146720	24.6052	28.3697	23.1963	21.213	16.8135	10.2299	6.35021	11.5448	-1.11574	5e-05	0.0017469	45.0136	34.278	30.2338	22.716	12.6699	14.9982	7.27706	13.8036	-0.840806	4.09238e-05	0.00299244	27.3336	19.5849	18.7901	12.5311	7.40519	8.69851	4.10372	7.02593	-1.16762	8.02283e-07	7.1076e-05	GO:0005515,GO:0016020,GO:0016021	tissue type plasminogen activator;Smp_146720	Putative uncharacterized protein [Source:UniProtKB/TrEMBL;Acc:G4VK82]	_	_
Smp_075370	30.4459	45.6702	31.1501	17.0742	12.9441	13.8871	16.9274	14.0296	-1.10545	5e-05	0.0017469	48.3945	27.33	26.3659	12.4404	11.449	11.8019	12.1126	7.17132	-0.728325	0.000837971	0.0235775	29.5277	15.848	16.7728	7.11152	6.85144	7.02544	7.0406	3.74718	-1.15435	2.82789e-05	0.00124659		hypothetical protein;note=predicted by EVM2;Smp_075370	Putative uncharacterized protein [Source:UniProtKB/TrEMBL;Acc:G4LX29]	_	_
Smp_148790	5.52655	5.34619	4.25546	4.92287	3.53158	1.92711	1.73926	2.15429	-1.1003	5e-05	0.0017469	8.00478	6.98169	4.79225	4.82102	2.65198	2.61417	1.827	2.6537	-0.749608	2.18741e-06	0.00028362	4.83094	3.98826	2.97315	2.66242	1.56453	1.52383	1.07796	1.35308	-1.05591	9.81122e-08	1.13326e-05		laminin subunit beta 1;Smp_148790	Laminin beta chain-related [Source:UniProtKB/TrEMBL;Acc:G4LWP4]	gi|143770880|ref|NP_031382.2|	laminin subunit beta-4 precursor [Homo sapiens]
Smp_017730	45.668	58.6747	41.8282	31.9987	25.2203	22.7187	14.041	21.6346	-1.09143	5e-05	0.0017469	73.2997	48.5402	41.5306	26.724	21.4418	20.8361	11.6689	15.5011	-0.808889	2.10468e-05	0.0017647	44.3933	27.7076	25.8862	14.7919	12.5637	12.0988	6.61108	7.90819	-1.19215	1.61339e-07	1.775e-05	GO:0005515	200-kDa GPI-anchored surface glycoprotein;Smp_017730	200-kDa GPI-anchored surface glycoprotein [Source:UniProtKB/TrEMBL;Acc:G4VP56]	_	_
Smp_149860	39.6938	38.6456	43.1086	36.0895	33.0807	12.6336	12.6663	15.9077	-1.08449	5e-05	0.0017469	46.5218	40.6789	42.4809	29.6873	12.5621	16.1449	10.3719	20.439	-0.832115	0.000217037	0.00989015	28.5299	23.6946	26.9469	16.3715	7.62775	9.59892	6.16123	10.6945	-1.0843	4.51339e-05	0.00182233		cat eye syndrome critical region protein 5;Smp_149860	Putative uncharacterized protein [Source:UniProtKB/TrEMBL;Acc:G4VI46]	_	_
Smp_002600	17.1599	16.7976	15.927	17.4244	13.3646	5.76646	6.66951	6.07352	-1.07842	5e-05	0.0017469	25.6182	22.0259	19.3704	17.5655	6.7659	8.2421	6.21666	9.66888	-0.841258	2.73122e-06	0.000340104	14.892	12.0805	11.4891	9.15756	3.75139	4.55395	3.32197	4.55822	-1.16303	6.98555e-07	6.3112e-05	GO:0004180,GO:0004185,GO:0006508,GO:0008236,GO:0008239,GO:0016787	Lysosomal Pro X carboxypeptidase;Smp_002600	Lysosomal Pro-Xaa carboxypeptidase (S28 family) [Source:UniProtKB/TrEMBL;Acc:G4VF49]	gi|62420888|ref|NP_037511.2|	dipeptidyl peptidase 2 preproprotein [Homo sapiens]
Smp_144450	5.945	6.69884	3.55436	5.28216	4.01879	2.12541	1.41246	2.64682	-1.07396	5e-05	0.0017469	7.56896	5.7113	3.21342	4.01667	1.99056	2.47651	1.0222	2.27892	-0.803999	0.00254385	0.0473889	4.3224	3.05731	1.92148	2.15269	1.09249	1.37947	0.569381	1.062	-1.14655	0.000210158	0.00567365	GO:0000166,GO:0003676	apobec 1 complementation factor;Smp_144450	Apobec-1 complementation factor-related [Source:UniProtKB/TrEMBL;Acc:G4M1J4]	gi|21450675|ref|NP_659416.1|	probable RNA-binding protein 46 [Homo sapiens]
Smp_167630	23.1342	24.8062	26.6575	20.9983	16.5258	10.4038	8.06816	10.4733	-1.072	5e-05	0.0017469	31.2823	23.9244	25.9124	18.1175	10.0712	10.2485	6.72605	10.3877	-0.803715	4.40946e-07	8.03735e-05	18.9732	13.7712	16.3354	10.0939	5.96398	6.04884	3.86187	5.32831	-1.13817	2.67081e-08	3.49596e-06	GO:0005385,GO:0005887,GO:0006882,GO:0016020,GO:0016021,GO:0030001,GO:0046873,GO:0055085,GO:0071578	zinc transporter foi;Smp_167630	Solute carrier family, putative [Source:UniProtKB/TrEMBL;Acc:G4LVV0]	gi|223633937|ref|NP_689938.2|	zinc transporter ZIP12 isoform 2 [Homo sapiens]
Smp_131420	4.25043	4.76566	1.98247	3.39992	2.13733	1.34976	1.69686	1.68158	-1.06847	0.00075	0.0158697	5.52035	3.69189	1.608	2.67065	0.916019	1.58123	1.19319	0.980499	-0.805547	0.00110821	0.0289169	3.72319	2.47932	1.24354	1.7042	0.695346	0.983407	0.846396	0.584649	-1.21977	0.000143081	0.0042253	GO:0016020,GO:0016021	testis specific protein pbs13;note=predicted by EVM2;note=pfam_scan%3BPfam:PF05794.8%3B%3BE()%3D1.2E-70%3Bscore%3D238.2%3Bqu ery 74-475%3Bdescription%3DTcp11;note=iprscan%3BInterPro:IPR008862 : T-complex 11%3BPfam:PF05794%3B%3Bscore%3D1.9E-49%3Bquery 73-522%3Bdescription%3DT-complex 11;note=tmhmm%3B%3Bquery 1-523%3B;note=%3Bquery 382-523%3B;note=%3Bquery 359-381%3B;note=%3Bquery 1-358%3B;Smp_1314…
Smp_199660	6.28131	6.46138	3.52499	4.61367	3.36419	2.21361	1.90875	2.59007	-1.0512	0.0001	0.00315175	7.45934	6.50873	3.28908	4.27605	2.13767	2.66709	1.68231	2.51456	-0.664216	0.00146668	0.0342233	5.12991	4.60239	2.39005	2.68545	1.40246	1.80072	1.16932	1.40661	-1.00688	0.000313518	0.00773202	GO:0000166,GO:0004672,GO:0004674,GO:0005524,GO:0006468,GO:0016301,GO:0016310,GO:0016772	serine:threonine protein;Smp_199660	Protein kinase [Source:UniProtKB/TrEMBL;Acc:G4M1Y8]	gi|41281453|ref|NP_055535.2|	STE20-like serine/threonine-protein kinase [Homo sapiens]
SmVG_020010	6.21059	6.87001	5.6142	6.38848	5.50406	2.52194	1.83425	2.25759	-1.04959	5e-05	0.0017469	9.15607	7.28504	6.66704	5.46336	2.16865	2.23848	1.64473	3.24905	-0.963394	1.45205e-05	0.00134829	7.08875	5.56474	5.43166	3.77339	1.47477	1.50147	1.17154	2.04269	-1.39779	2.21578e-06	0.000171347
Smp_146250	7.65106	9.53357	6.31677	4.60575	5.21362	2.97404	1.9134	3.49052	-1.04822	0.0001	0.00315175	14.3451	9.66615	8.15382	4.72011	3.05414	4.12298	2.24174	3.50053	-0.82475	0.000284048	0.0117403	8.99241	5.69627	5.19296	2.74142	1.86587	2.56063	1.30862	1.84757	-1.21574	4.24737e-05	0.00173799	GO:0003824,GO:0004560,GO:0005975,GO:0006004,GO:0008152,GO:0016787,GO:0016798	fucosidase%2C alpha L 2%2C plasma;Smp_146250	Alpha-l-fucosidase, putative [Source:UniProtKB/TrEMBL;Acc:G4LY49]	gi|119360348|ref|NP_000138.2|	tissue alpha-L-fucosidase precursor [Homo sapiens]
SmVG_008690	8.7384	7.15822	6.24604	8.44359	5.96839	1.896	2.85775	4.08401	-1.04669	0.0039	0.0483557	22.9444	24.1184	18.1418	18.1208	9.3966	10.2088	7.33765	11.6259	-0.579583	0.0015809	0.0359935	17.2393	15.0619	12.1366	11.6481	6.29176	7.3096	4.82299	6.93825	-0.750858	0.00427478	0.0445391	GO:0006812,GO:0016021,GO:0016887
Smp_131020	10.1152	11.1643	8.6152	6.94518	6.03136	3.77337	4.05563	3.97994	-1.04613	5e-05	0.0017469	16.0841	11.6178	9.30813	6.29891	4.36674	4.49986	3.90081	4.30015	-0.70685	1.45796e-05	0.00134829	9.96065	6.76261	5.96815	3.55882	2.60329	2.64167	2.23492	2.22055	-1.06794	6.07052e-06	0.000378503	GO:0016020,GO:0016021	transmembrane and TPR repeat containing protein;Smp_131020	Putative uncharacterized protein [Source:UniProtKB/TrEMBL;Acc:G4VHF1]	_	_
Smp_041460	195.705	298.087	154.157	173.386	116.487	96.4198	101.262	86.6948	-1.03486	5e-05	0.0017469	327.912	183.646	136.234	125.322	81.7156	76.5801	75.9767	63.5195	-0.707866	1.69345e-05	0.00151999	202.189	107.364	86.9347	72.09	49.4878	45.6403	44.6035	33.9373	-1.09274	2.37518e-07	2.49121e-05	GO:0005887,GO:0007166,GO:0016020,GO:0016021	tetraspanin CD63 receptor;Smp_041460	Tetraspanin, putative [Source:UniProtKB/TrEMBL;Acc:G4LWW2]	_	_
Smp_139810	12.3959	14.6546	11.583	8.1952	5.77132	5.6531	5.63165	5.85764	-1.03118	5e-05	0.0017469	18.4646	13.0369	11.5092	7.21234	5.43322	5.87929	4.6895	3.88092	-0.720729	4.26819e-08	9.7602e-06	11.4748	7.77181	7.38817	4.18762	3.36428	3.59976	2.81236	2.08828	-1.07628	2.99564e-09	4.48119e-07	GO:0003341,GO:0005930,GO:0016874,GO:0036159,GO:0060285	coiled coil domain containing protein 39;Smp_139810	Putative ubiquitin-protein ligase BRE1 [Source:UniProtKB/TrEMBL;Acc:G4VDG5]	gi|157785668|ref|NP_852091.1|	coiled-coil domain-containing protein 39 [Homo sapiens]
Smp_085840	2730.86	3358.88	3166.95	2215.44	2107.37	1038.77	1405.64	1071.46	-1.02866	5e-05	0.0017469	3430.93	2432.51	2724.42	1585.35	854.566	903.036	1004.78	1119.65	-0.738464	8.80111e-05	0.00506116	2092.64	1389.37	1711.13	874.415	508.22	537.136	581.898	563.985	-1.04769	2.46584e-06	0.000189082		MEG-4 (10.3) family;Smp_085840	MEG-4 (10.3) family [Source:UniProtKB/TrEMBL;Acc:C4QKE8]	_	_
Smp_208030	8.43061	7.5042	7.21828	6.39492	4.33067	3.64837	2.80226	3.73469	-1.02542	5e-05	0.0017469	9.35566	8.85143	7.3866	5.50429	3.53408	3.90763	2.54121	2.73539	-0.72636	4.08717e-13	2.44783e-10	5.7142	5.13362	4.63178	3.13933	2.13273	2.34206	1.47396	1.42394	-1.04902	5.23521e-12	1.11096e-09	GO:0005515	hypothetical protein;note=pfam_scan%3BPfam:PF13895.1%3B%3BE()%3D1.1E-4%3Bscore%3D22.1%3Bquer y 2827-2916%3Bdescription%3DIg_2;Smp_208030	Putative uncharacterized protein [Source:UniProtKB/TrEMBL;Acc:G4VE00]	_	_
SmVG_012328:Smp_013310	12.1524	15.7285	11.0113	7.24099	5.16535	5.55277	6.46623	5.69334	-1.01186	5e-05	0.0017469	28.3721	19.8882	19.8187	10.5693	9.0475	9.17726	8.58938	6.53062	-0.644571	1.02297e-05	0.00107349	17.6619	11.8597	12.7133	6.24462	5.50212	5.65233	5.14927	3.62063	-0.962135	9.9595e-08	1.13601e-05		hypothetical protein;Smp_013310	Putative uncharacterized protein [Source:UniProtKB/TrEMBL;Acc:G4VEH7]	_	_
SmVG_012328:Smp_129350	12.1524	15.7285	11.0113	7.24099	5.16535	5.55277	6.46623	5.69334	-1.01186	5e-05	0.0017469	28.3721	19.8882	19.8187	10.5693	9.0475	9.17726	8.58938	6.53062	-0.644571	1.02297e-05	0.00107349	17.6619	11.8597	12.7133	6.24462	5.50212	5.65233	5.14927	3.62063	-0.962135	9.9595e-08	1.13601e-05		ras and EF hand domain containing protein;Smp_129350	Putative rab [Source:UniProtKB/TrEMBL;Acc:G4VEH6]	gi|190358517|ref|NP_004209.2|	ras-related protein Rab-11B [Homo sapiens]
Smp_126540	23.2155	25.2517	21.6517	16.2208	13.8319	10.7441	7.53018	10.8816	-1.0061	5e-05	0.0017469	32.6657	26.209	22.6336	14.7433	10.5548	11.1352	6.58184	9.0604	-0.763327	2.10762e-06	0.000276336	19.3391	14.6659	13.8576	8.09798	6.18903	6.42943	3.7591	4.5561	-1.08657	1.77554e-08	2.41818e-06	GO:0005198,GO:0007155,GO:0031012	hypothetical protein;Smp_126540	Putative uncharacterized protein [Source:UniProtKB/TrEMBL;Acc:G4V7J0]	_	_
Smp_143750	4.63537	5.13741	3.7172	2.72859	2.51597	2.04686	1.89753	1.62374	-1.00449	5e-05	0.0017469	7.3191	5.81998	4.15112	2.61537	2.09508	2.13904	1.72103	1.70849	-0.722237	2.04798e-05	0.00174036	4.46334	3.37013	2.56327	1.52331	1.16812	1.31208	0.962999	0.902843	-1.10397	8.76865e-06	0.00048789	GO:0016020,GO:0016021	transmembrane protein 63A;Smp_143750	Putative metazoan probable membrane protein [Source:UniProtKB/TrEMBL;Acc:G4VSR7]	gi|270288733|ref|NP_055513.2|	transmembrane protein 63A [Homo sapiens]
Smp_171140	10.6646	13.0836	6.13482	8.71631	6.44158	5.14425	4.21131	3.44518	-1.00429	5e-05	0.0017469	21.5764	14.4945	9.46889	9.7881	6.88221	5.18956	5.25176	6.04852	-0.643122	0.000574393	0.0183354	13.4732	8.60164	6.23723	5.74741	4.18388	3.1476	3.12395	3.30306	-0.969254	7.73137e-05	0.0026927	GO:0016020,GO:0016021	serine rich repeat protein;note=predicted by EVM2;note=tmhmm%3B%3Bquery 1-789%3B;note=%3Bquery 765-789%3B;note=%3Bquery 742-764%3B;note=%3Bquery 1-741%3B;Smp_171140	Putative serine-rich repeat protein [Source:UniProtKB/TrEMBL;Acc:G4VCV5]	_	_
Smp_156390	12.223	13.4122	9.34121	9.67688	6.97568	4.97113	4.45509	5.90362	-1.00137	5e-05	0.0017469	20.1539	16.0198	11.3907	10.1444	6.46075	7.06682	4.8732	5.18383	-0.703983	3.738e-09	9.79434e-07	12.8286	9.48785	7.29703	5.87145	3.89466	4.19706	2.88366	2.72172	-1.05371	6.32434e-09	9.16026e-07	GO:0005515,GO:0005543,GO:0007165	growth factor receptor bound protein;Smp_156390	Putative growth factor receptor-bound protein [Source:UniProtKB/TrEMBL;Acc:G4VF71]	gi|42740893|ref|NP_976241.1|	ras-associated and pleckstrin homology domains-containing protein 1 isoform 3 [Homo sapiens]
Smp_123100	2715.56	3515.81	3066.83	2811.12	2370.27	1121.71	1383.48	1182.73	-0.99916	5e-05	0.0017469	5996.34	4240.2	4795.16	3060.95	1747.25	1679.99	1861.08	2102.24	-0.673125	9.07683e-05	0.00514231	3656.48	2418.16	3246.58	1678.37	1118.61	1065.04	1125.35	1164.36	-0.95098	5.06505e-06	0.000330133	GO:0016020,GO:0016021	hypothetical protein;note=tmhmm%3B%3Bquery 1-40%3B;Smp_123100	Putative uncharacterized protein [Source:UniProtKB/TrEMBL;Acc:G4VLG4]	_	_
Smp_086470	2.00541	2.36222	1.43082	1.61393	0.70062	1.47745	0.625659	0.939561	-0.985628	0.00085	0.0173346	4.53436	3.26462	2.97857	2.80253	2.14332	1.94811	1.65272	1.35356	-0.478209	0.00264657	0.0487349	2.79271	1.98219	1.98453	1.55425	1.36791	1.13218	0.93249	0.710123	-0.709643	0.000258079	0.00650545	GO:0005509,GO:0005875,GO:0007017,GO:0030286	tegument-allergen-like protein;Smp_086470	Putative 22.6kDa tegument-associated antigen [Source:UniProtKB/TrEMBL;Acc:G4VA23]	_	_
Smp_077880	117.957	117.434	126.341	103.106	83.4471	52.5398	43.5998	55.5155	-0.983439	5e-05	0.0017469	149.697	131.413	139.546	90.2315	51.9026	58.8537	40.44	58.5983	-0.711734	4.90318e-06	0.000570994	92.1975	76.064	86.838	51.6167	31.0226	35.4542	23.358	30.5587	-0.994645	1.30198e-07	1.46674e-05	GO:0005509,GO:0005544	annexin;Smp_077880	Putative annexin [Source:UniProtKB/TrEMBL;Acc:G4VL82]	_	_
Smp_000755	54.7198	58.1803	58.3964	46.2643	36.2369	27.0403	21.45	26.7386	-0.964817	5e-05	0.0017469	83.1267	63.9736	64.468	44.5166	28.3418	29.6981	19.9538	24.9731	-0.731562	2.60011e-09	7.26703e-07	49.7011	35.9903	39.5613	24.2305	16.3024	17.0247	11.0693	12.363	-1.05985	5.50976e-11	1.09297e-08	GO:0004222,GO:0006508,GO:0008237,GO:0016020,GO:0016021,GO:0016787	family M13 non peptidase ue (M13 family);Smp_000755	Family M13 non-peptidase homologue (M13 family) [Source:UniProtKB/TrEMBL;Acc:G4V669]	_	_
SmVG_035866	4.00039	4.52437	2.4187	3.50874	1.98836	2.26016	1.44194	1.7266	-0.962371	0.00105	0.0201806	7.11367	6.24068	3.39487	3.91239	3.09937	2.83371	1.78354	1.78214	-0.590608	0.000496315	0.0166164	4.57129	3.95463	2.35338	2.32394	1.95102	1.78643	1.03416	1.06196	-0.895172	0.00053	0.0108436
Smp_075360	10.3428	17.1097	11.4251	7.18595	5.5298	5.18905	6.61598	6.31287	-0.961925	5e-05	0.0017469	18.7563	9.93282	10.4626	5.45838	4.39188	5.45245	4.99533	3.09016	-0.669087	0.00067659	0.0202976	11.7022	5.85732	6.71649	3.14231	2.77999	3.4411	2.96212	1.68246	-1.01693	0.000191943	0.00526224		hypothetical protein;note=predicted by EVM2;Smp_075360	Putative uncharacterized protein [Source:UniProtKB/TrEMBL;Acc:G4LX30]	_	_
Smp_155890	33.7098	38.2459	35.5092	27.9943	24.2861	16.9834	10.4043	17.9143	-0.960945	5e-05	0.0017469	53.7488	39.8025	40.7628	27.5029	19.1589	21.1121	10.0466	18.3064	-0.699243	0.000398264	0.0145266	34.251	23.9102	26.4272	15.8401	11.3371	12.6058	6.04251	9.69832	-0.986429	1.48905e-05	0.000742493	GO:0003824,GO:0004035,GO:0008152,GO:0016311,GO:0016787,GO:0016791	alkaline phosphatase;Smp_155890	Putative alkaline phosphatase [Source:UniProtKB/TrEMBL;Acc:G4VJ94]	gi|94721246|ref|NP_001623.3|	alkaline phosphatase, placental type preproprotein [Homo sapiens]
Smp_146120	6.0556	7.62133	4.08024	5.56234	4.75121	2.64147	2.13653	2.53585	-0.950703	5e-05	0.0017469	8.77046	6.08978	3.84491	4.38841	2.32082	2.64026	1.84421	3.00533	-0.656069	0.00272305	0.0497281	5.3773	3.54175	2.40492	2.47971	1.39432	1.51995	1.08981	1.51857	-0.946357	0.000325271	0.00794277	GO:0003824,GO:0004114,GO:0007165,GO:0008081,GO:0008152,GO:0016787,GO:0046872	high affinity cGMP specific 3'%2C5' cyclic;Smp_146120	Putative high-affinity cgmp-specific 3,5-cyclic phosphodiesterase [Source:UniProtKB/TrEMBL;Acc:G4VDB6]	gi|48762722|ref|NP_001001569.1|	high affinity cGMP-specific 3',5'-cyclic phosphodiesterase 9A isoform d [Homo sapiens]
Smp_079640	5.44088	5.84398	4.78866	4.91123	3.93691	2.55312	1.6904	2.68386	-0.949748	5e-05	0.0017469	6.06418	4.90109	4.15091	3.51767	2.10288	2.31312	1.23445	2.01689	-0.729092	1.15812e-05	0.00114691	3.65186	2.78311	2.55348	1.94011	1.21149	1.34158	0.69147	0.988807	-1.02718	7.07699e-06	0.000413958	GO:0005215,GO:0016020,GO:0016021,GO:0034220,GO:0055085	monocarboxylate transporter;Smp_079640	Putative monocarboxylate transporter [Source:UniProtKB/TrEMBL;Acc:G4V7W3]	_	_
Smp_130070	7.07312	8.74056	6.78818	6.45132	4.23984	3.91042	3.03266	3.903	-0.945493	5e-05	0.0017469	10.9056	7.62244	6.98075	5.53746	3.75825	3.90564	2.5805	2.85813	-0.683236	3.28318e-09	8.78566e-07	6.52161	4.35796	4.26246	3.0508	2.15443	2.25657	1.4406	1.41675	-1.01572	1.94295e-08	2.60726e-06	GO:0005515,GO:0016020,GO:0016021	nephrin;Smp_130070	Putative nephrin [Source:UniProtKB/TrEMBL;Acc:G4VBT7]	gi|4758822|ref|NP_004637.1|	nephrin precursor [Homo sapiens]
SmVG_025381:Smp_104270	39.284	39.7343	41.1167	32.0768	24.2243	18.0159	18.5103	18.305	-0.945143	5e-05	0.0017469	46.1607	40.0244	40.1103	25.0227	18.8882	19.4715	17.9051	14.2695	-0.581321	5.6292e-12	2.62216e-09	27.9157	22.8378	24.84	13.7307	10.96	11.2194	10.019	7.25986	-0.862449	4.05764e-11	8.228e-09		ectonucleotide pyrophosphatase:phosphodiesterase;Smp_104270	Putative ectonucleotide pyrophosphatase/phosphodiesterase [Source:UniProtKB/TrEMBL;Acc:G4VRB5]	gi|91823274|ref|NP_006200.3|	ectonucleotide pyrophosphatase/phosphodiesterase family member 2 isoform 1 preproprotein [Homo sapiens]
SmVG_025381:Smp_180390	39.284	39.7343	41.1167	32.0768	24.2243	18.0159	18.5103	18.305	-0.945143	5e-05	0.0017469	46.1607	40.0244	40.1103	25.0227	18.8882	19.4715	17.9051	14.2695	-0.581321	5.6292e-12	2.62216e-09	27.9157	22.8378	24.84	13.7307	10.96	11.2194	10.019	7.25986	-0.862449	4.05764e-11	8.228e-09		mitochondrial carrier 2;Smp_180390	Putative mitochondrial carrier [Source:UniProtKB/TrEMBL;Acc:G4VRB6]	gi|7657347|ref|NP_055157.1|	mitochondrial carrier homolog 2 [Homo sapiens]
Smp_166890	20.7388	26.5753	20.0374	19.7613	19.9618	8.864	8.20657	8.30913	-0.942051	5e-05	0.0017469	29.754	20.091	17.8169	15.2893	7.66195	7.32692	6.45292	11.1668	-0.757299	0.000700751	0.0208168	18.2885	11.684	11.2734	8.6202	4.54445	4.3499	3.70734	5.76133	-1.02905	0.000133488	0.00410128		ATPase;Smp_166890	ATPase, putative [Source:UniProtKB/TrEMBL;Acc:G4M1D0]	_	_
Smp_128220	6.9829	7.58754	7.08438	6.21891	5.72782	3.69954	1.64684	3.47624	-0.937843	5e-05	0.0017469	13.2717	10.4313	9.90095	6.73305	4.52139	4.74765	2.55778	4.73824	-0.724553	0.000251471	0.0107944	8.06905	5.97359	6.18932	3.71809	2.65476	2.74671	1.42976	2.39821	-1.01171	6.94597e-05	0.00250522	GO:0005515,GO:0016020,GO:0016021	neurogenic locus notch;Smp_128220	Putative pro-neuregulin-4, membrane-bound isoform (Pro-NRG4) [Source:UniProtKB/TrEMBL;Acc:G4VD78]	gi|134244285|ref|NP_000426.2|	neurogenic locus notch homolog protein 3 precursor [Homo sapiens]
Smp_156530	15.183	16.5051	9.4448	12.4383	10.9511	6.32952	4.23551	6.49536	-0.93544	5e-05	0.0017469	22.978	19.4009	10.9035	12.5803	6.68616	7.51219	3.7098	7.53636	-0.77277	0.00120447	0.0303742	14.6223	11.4124	6.98896	7.12949	3.9217	4.35372	2.21878	3.90775	-1.08165	0.000167357	0.00478725	GO:0003824,GO:0004497,GO:0004504,GO:0005507,GO:0005515,GO:0006518,GO:0016020,GO:0016715,GO:0055114	peptidylglycine alpha amidating monooxygenase;Smp_156530
Smp_130580	81.0623	88.9497	74.6615	62.0605	58.0963	36.0101	27.219	39.6464	-0.93018	5e-05	0.0017469	141.654	108.997	96.9249	65.3845	47.359	53.2867	31.2263	47.9637	-0.641629	0.000220645	0.00995857	85.5428	61.6974	59.8202	35.6638	27.4927	30.4712	17.4083	23.7922	-0.913417	1.0825e-05	0.000584485	GO:0005515,GO:0032502	disabled 2;Smp_130580	Putative uncharacterized protein [Source:UniProtKB/TrEMBL;Acc:G4VRS1]	_	_
Smp_121930	6.76877	5.93529	6.76942	7.26804	4.47404	3.11941	2.51049	4.01037	-0.921923	0.0001	0.00315175	9.44746	9.4571	8.7422	8.30425	4.79857	5.75279	2.5691	3.7033	-0.63257	5.31748e-05	0.00345185	5.99612	5.57103	5.38401	4.75434	2.80133	3.30734	1.52178	1.96124	-0.894271	4.45519e-05	0.00180683	GO:0016020,GO:0016021	hypothetical protein;Smp_121930	Putative uncharacterized protein [Source:UniProtKB/TrEMBL;Acc:G4VGD0]	_	_
Smp_136550	6.51799	6.93446	5.78721	4.06141	4.15892	2.70938	2.31414	3.19853	-0.912273	5e-05	0.0017469	8.30532	6.59497	5.85746	3.50355	2.54822	3.10122	1.97686	2.52856	-0.671013	4.44405e-05	0.003088	4.97491	3.711	3.57024	1.93419	1.45755	1.79311	1.10043	1.25834	-0.983185	2.23361e-05	0.00105604	GO:0004672,GO:0004715,GO:0005102,GO:0005524,GO:0006468,GO:0007169,GO:0016020,GO:0016021,GO:0016301,GO:0016310,GO:0016772,GO:0030154,GO:0031234,GO:0038083,GO:0042127,GO:0045087	tyrosine protein kinase transmembrane receptor;Smp_136550	Tyrosine kinase [Source:UniProtKB/TrEMBL;Acc:G4LX52]	gi|5031927|ref|NP_005583.1|	muscle, skeletal receptor tyrosine-protein kinase isoform 1 [Homo sapiens]
Smp_144590	2.80067	3.47821	2.29266	2.52644	2.17566	1.0785	1.19455	1.47905	-0.904738	5e-05	0.0017469	4.4057	3.03188	2.33525	2.17295	1.08532	1.46492	1.05547	1.38034	-0.680046	0.000109471	0.00593455	2.72422	1.79157	1.47421	1.22024	0.646506	0.882851	0.611606	0.721255	-0.974361	6.67378e-05	0.00242623	GO:0005096,GO:0005622,GO:0005737,GO:0007165,GO:0031235,GO:0043087,GO:0043547,GO:0046580,GO:0051056,GO:0032318	ras gtpase activating protein;Smp_144590	Putative synaptic ras gtpase activating protein, syngap [Source:UniProtKB/TrEMBL;Acc:G4V7T0]	gi|4758808|ref|NP_004832.1|	ras GTPase-activating protein nGAP isoform 1 [Homo sapiens]
Smp_154760	15.3557	16.489	13.6907	15.7896	13.651	7.27926	4.98736	6.85413	-0.904027	5e-05	0.0017469	22.1232	18.1801	15.2164	14.9754	7.33595	7.58205	4.72799	9.42595	-0.7389	0.000395446	0.0145001	12.9784	10.0297	9.1668	7.95992	4.13005	4.24577	2.5769	4.58275	-0.991009	5.44233e-05	0.00206922	GO:0005509,GO:0005515	egf domain protein;Smp_154760	Egf-like domain protein [Source:UniProtKB/TrEMBL;Acc:G4V9N7]	gi|148833508|ref|NP_060087.3|	neurogenic locus notch homolog protein 1 preproprotein [Homo sapiens]
SmVG_031555	2.94396	3.51651	5.03591	4.1412	3.36381	1.55002	1.69533	1.75603	-0.902547	0.0002	0.0055642	8.43342	5.86453	8.33969	6.36297	3.67781	2.89453	3.07318	3.42856	-0.621612	5.88981e-05	0.00374122	5.03074	3.32197	5.02768	3.46422	2.02524	1.64715	1.80012	1.69812	-0.896997	3.19204e-05	0.00133612	GO:0005875,GO:0007017
Smp_007210	3.46496	4.74743	2.7381	2.31542	2.05676	1.48226	1.71341	1.85096	-0.901145	0.0001	0.00315175	6.37953	4.04313	3.09706	2.19504	1.56859	1.99077	1.91074	1.37948	-0.598062	0.000677822	0.0202976	3.82962	2.29968	1.93778	1.20313	0.915986	1.15456	1.05776	0.703071	-0.930532	0.000332463	0.00796254	GO:0005096,GO:0005097,GO:0005622,GO:0006886,GO:0012505,GO:0017137,GO:0031338,GO:0032313,GO:0032851,GO:0090630	rab GTPase activating protein 1;Smp_007210	Putative rab6 gtpase activating protein, gapcena (Rabgap1 protein) [Source:UniProtKB/TrEMBL;Acc:G4VB12]	gi|164519084|ref|NP_036329.3|	rab GTPase-activating protein 1 [Homo sapiens]
Smp_000660	85.7653	89.1859	100.092	83.3156	73.908	40.7449	35.0077	44.0519	-0.887486	5e-05	0.0017469	156.411	128.968	143.069	96.0631	56.2057	59.3515	42.5712	65.3793	-0.680958	4.17844e-05	0.0030377	94.1938	73.1302	88.454	53.0068	32.8076	34.2063	24.124	33.2699	-0.947963	2.08241e-06	0.000164326	GO:0003824,GO:0004587,GO:0005737,GO:0008152,GO:0008483,GO:0010121,GO:0016740,GO:0019544,GO:0030170,GO:0042802	ornithine--oxo-acid transaminase;Smp_000660	Ornithine--oxo-acid transaminase [Source:UniProtKB/TrEMBL;Acc:G4LYG5]	gi|226442705|ref|NP_001140062.1|	alanine--glyoxylate aminotransferase 2-like 1 isoform 2 [Homo sapiens]
SmVG_024005:Smp_194800	7.43523	8.76743	6.10255	6.1417	5.52462	3.47313	3.09281	3.32452	-0.883929	5e-05	0.0017469	12.4257	8.7439	7.29136	5.71838	3.93335	4.03294	3.20743	3.89997	-0.617913	2.86547e-05	0.00229548	7.48996	4.95301	4.4729	3.16946	2.29414	2.287	1.7802	1.94515	-0.907544	7.83265e-06	0.000446706		ATP dependent RNA helicase Ddx1;note=manually curated%2C based on EST sequences%3B annotation provided by Ricardo De Marco and Alan Wilson (University of York);note=pfam_scan%3BPfam:PF00622.23%3B%3BE()%3D2.4E-10%3Bscore%3D40.4%3Bqu ery 81-218%3Bdescription%3DSPRY;note=pfam_scan%3BPfam:PF00622.23%3B%3BE()%3D9.5E-16%3Bscore%3D57.8%3Bqu ery 297-422%3Bdescription%3DSPRY;note=iprscan%3BInterPro:IPR003…	SPRY domain containing protein [Source:UniProtKB/TrEMBL;Acc:G4VQJ8]	gi|4826686|ref|NP_004930.1|	ATP-dependent RNA helicase DDX1 [Homo sapiens]
SmVG_024005:Smp_194810	7.43523	8.76743	6.10255	6.1417	5.52462	3.47313	3.09281	3.32452	-0.883929	5e-05	0.0017469	12.4257	8.7439	7.29136	5.71838	3.93335	4.03294	3.20743	3.89997	-0.617913	2.86547e-05	0.00229548	7.48996	4.95301	4.4729	3.16946	2.29414	2.287	1.7802	1.94515	-0.907544	7.83265e-06	0.000446706		band 4;Smp_194810	Band 4.1-like protein [Source:UniProtKB/TrEMBL;Acc:G4VQJ7]	gi|32490572|ref|NP_036439.2|	band 4.1-like protein 3 [Homo sapiens]
SmVG_029392:Smp_088180	7.10292	6.60422	5.78935	6.78918	4.66784	3.2534	2.801	3.59655	-0.876368	5e-05	0.0017469	8.01138	6.98417	5.68199	5.79012	3.1324	3.18629	2.60247	3.03763	-0.621792	1.74537e-06	0.000238603	5.05091	4.29523	3.76123	3.45791	2.00894	1.99722	1.62713	1.63528	-0.891813	9.81491e-07	8.44916e-05		hypothetical protein;note=predicted by EVM2;Smp_088180	Putative uncharacterized protein [Source:UniProtKB/TrEMBL;Acc:G4LXW7]	_	_
SmVG_029392:Smp_170150	7.10292	6.60422	5.78935	6.78918	4.66784	3.2534	2.801	3.59655	-0.876368	5e-05	0.0017469	8.01138	6.98417	5.68199	5.79012	3.1324	3.18629	2.60247	3.03763	-0.621792	1.74537e-06	0.000238603	5.05091	4.29523	3.76123	3.45791	2.00894	1.99722	1.62713	1.63528	-0.891813	9.81491e-07	8.44916e-05		hypothetical protein;Smp_170150	Putative uncharacterized protein [Source:UniProtKB/TrEMBL;Acc:G4LXW8]	_	_
Smp_156370	8.15757	8.56079	5.85943	5.08761	3.84998	3.54939	2.62088	5.08784	-0.87276	5e-05	0.0017469	11.9686	9.73869	6.64217	5.13996	3.74327	5.59931	2.57677	2.97697	-0.634089	0.000433096	0.0154307	7.39311	5.76477	4.28419	2.98515	2.31225	3.40843	1.57589	1.60935	-0.920316	0.000257881	0.00650545		coiled coil domain containing protein 147;Smp_156370	Putative uncharacterized protein [Source:UniProtKB/TrEMBL;Acc:G4VF73]	gi|110624781|ref|NP_003793.2|	myosin-13 [Homo sapiens]
Smp_004590	4.88117	6.90733	5.39321	3.59113	3.41968	2.33356	3.0094	2.60556	-0.869696	0.00025	0.00680816	6.78316	4.0946	4.48416	2.41433	1.8311	2.12904	2.09294	1.70947	-0.599779	0.000391682	0.0144862	4.14721	2.35606	2.80836	1.35751	1.06738	1.25698	1.19851	0.888635	-0.927	0.000242154	0.0062953		hypothetical protein;Smp_004590	Putative uncharacterized protein [Source:UniProtKB/TrEMBL;Acc:G4VHE1]	_	_
Smp_098710	32.8001	37.2083	36.7104	25.0471	21.5654	16.568	16.8094	17.3017	-0.867019	5e-05	0.0017469	56.0194	42.2349	45.1121	25.3842	18.5678	21.7777	17.4241	16.8946	-0.615543	1.70481e-06	0.000235619	33.3412	23.7137	27.7831	13.8737	10.7238	12.501	9.72141	8.45153	-0.918584	2.80371e-08	3.60336e-06	GO:0003756,GO:0005615,GO:0006457,GO:0016020,GO:0016021,GO:0016491,GO:0016971,GO:0016972,GO:0030173,GO:0055114	quiescin q6 sulfhydryl oxidase;Smp_098710	Quiescin q6-related sulfhydryl oxidase [Source:UniProtKB/TrEMBL;Acc:G4M193]	gi|13325075|ref|NP_002817.2|	sulfhydryl oxidase 1 isoform a [Homo sapiens]
SmVG_002464:Smp_008190	23.0746	25.3862	16.8882	15.3095	13.6713	9.61696	9.67984	11.4034	-0.862191	5e-05	0.0017469	29.6604	23.342	16.3628	12.4326	9.08056	10.6823	7.96758	8.27188	-0.609951	4.22806e-05	0.00303864	17.7531	13.2348	10.1399	6.86424	5.31865	6.19318	4.52076	4.20403	-0.9175	1.23724e-06	0.000102635		rho guanine nucleotide exchange factor 11;Smp_008190	Putative uncharacterized protein [Source:UniProtKB/TrEMBL;Acc:G4V7I1]	_	_
SmVG_002464:Smp_126600	23.0746	25.3862	16.8882	15.3095	13.6713	9.61696	9.67984	11.4034	-0.862191	5e-05	0.0017469	29.6604	23.342	16.3628	12.4326	9.08056	10.6823	7.96758	8.27188	-0.609951	4.22806e-05	0.00303864	17.7531	13.2348	10.1399	6.86424	5.31865	6.19318	4.52076	4.20403	-0.9175	1.23724e-06	0.000102635		hypothetical protein;Smp_126600	Putative uncharacterized protein [Source:UniProtKB/TrEMBL;Acc:G4V7I0]	_	_
SmVG_016404:Smp_145410	6.70369	8.42482	4.87249	6.69503	4.64885	3.85778	2.60036	3.62714	-0.857463	5e-05	0.0017469	12.6921	8.89851	6.4588	6.73923	4.34004	4.71674	2.84387	3.47697	-0.63381	1.11877e-05	0.00111673	7.74955	5.15798	4.08989	3.7894	2.59375	2.75375	1.69142	1.81986	-0.912704	2.81872e-06	0.000209112		STARP antigen;note=predicted by EVM2;Smp_145410	Putative starp antigen [Source:UniProtKB/TrEMBL;Acc:G4VIV0]	_	_
SmVG_016404:Smp_187390	6.70369	8.42482	4.87249	6.69503	4.64885	3.85778	2.60036	3.62714	-0.857463	5e-05	0.0017469	12.6921	8.89851	6.4588	6.73923	4.34004	4.71674	2.84387	3.47697	-0.63381	1.11877e-05	0.00111673	7.74955	5.15798	4.08989	3.7894	2.59375	2.75375	1.69142	1.81986	-0.912704	2.81872e-06	0.000209112		hypothetical protein;Smp_187390	Putative uncharacterized protein [Source:UniProtKB/TrEMBL;Acc:G4VIV1]	_	_
Smp_015020	15.2315	16.9608	12.4267	17.0971	13.1684	7.2493	6.56578	7.19054	-0.852748	5e-05	0.0017469	23.5026	17.8713	13.8134	15.6599	7.93079	7.93232	6.71299	8.9937	-0.627598	7.99904e-05	0.00472319	14.1121	10.1082	8.51285	8.60421	4.63322	4.53625	3.72691	4.48858	-0.899751	1.52884e-05	0.000754092	GO:0000166,GO:0005391,GO:0005524,GO:0005887,GO:0006754,GO:0006810,GO:0006811,GO:0006812,GO:0006813,GO:0006814,GO:0006883,GO:0010107,GO:0010248,GO:0015077,GO:0015672,GO:0015991,GO:0016020,GO:0016021,GO:0016787,GO:0016820,GO:0019829,GO:0030007,GO:0036376,GO:0043231,GO:0046872	sodium potassium transporting ATPase alpha subunit;Smp_015020	Sodium potassium transporting ATPase alpha subunit [Source:UniProtKB/TrEMBL;Acc:G4VGA5]	gi|28373113|ref|NP_777617.1|	sarcoplasmic/endoplasmic reticulum calcium ATPase 3 isoform f [Homo sapiens]
Smp_034660	18.8404	20.5706	19.6999	16.4658	12.4555	9.10145	9.38882	10.963	-0.850688	5e-05	0.0017469	22.9799	17.7465	17.5541	12.1829	7.73714	9.58094	7.09185	6.93714	-0.628037	9.69178e-10	2.97301e-07	13.9334	10.2541	10.9899	6.80383	4.57949	5.57208	4.01719	3.53729	-0.931074	1.8054e-09	2.79224e-07	GO:0000902,GO:0005086,GO:0032012,GO:0043547	IQ motif and SEC7 domain containing protein 1;Smp_034660	Cytohesin-related guanine nucleotide-exchange protein [Source:UniProtKB/TrEMBL;Acc:G4V948]	gi|197304786|ref|NP_001127854.1|	IQ motif and SEC7 domain-containing protein 1 isoform a [Homo sapiens]
Smp_150640	4.46419	4.71016	3.48501	5.4104	3.57538	2.2325	1.85884	2.43289	-0.839279	0.00055	0.012615	5.95271	5.21677	3.77077	4.91227	2.13277	2.27931	1.54574	2.31452	-0.704979	2.37388e-05	0.00195139	3.63855	3.00886	2.36342	2.76786	1.32778	1.32314	0.877382	1.22218	-0.990355	8.78015e-05	0.00298951		hypothetical protein;note=predicted by EVM2;Smp_150640	Putative uncharacterized protein [Source:UniProtKB/TrEMBL;Acc:G4LXS6]	_	_
Smp_196990	4.57058	5.89972	4.56704	3.76399	2.41776	3.18287	2.21025	2.72147	-0.836007	0.00075	0.0158697	8.08879	5.77624	5.55998	3.72291	3.61048	3.16394	2.35862	1.58261	-0.610276	0.000108375	0.00590059	5.51878	3.74078	3.8328	2.31209	2.35983	2.07286	1.6142	0.959927	-0.861373	9.68407e-05	0.00323689	GO:0016020,GO:0016021	protocadherin 11;Smp_196990	Putative uncharacterized protein [Source:UniProtKB/TrEMBL;Acc:G4V6G2]	_	_
Smp_147050	9.14104	12.4283	9.92079	9.43398	6.76465	4.72573	5.64403	5.82959	-0.833577	5e-05	0.0017469	25.8603	17.8484	16.45	12.7249	9.84433	11.2292	9.70903	7.05303	-0.471847	1.01114e-06	0.000153218	16.3892	10.7678	10.6165	7.19155	6.04722	6.73681	5.72104	3.85658	-0.685677	3.88844e-06	0.000277065	GO:0005524,GO:0006810,GO:0006811,GO:0015991,GO:0015992,GO:0016820,GO:0033178,GO:0033180,GO:0046034,GO:0046961	v type proton atpase catalytic subunit a;Smp_147050	Putative atp synthase alpha subunit vacuolar [Source:UniProtKB/TrEMBL;Acc:G4VKT8]	gi|19913424|ref|NP_001681.2|	V-type proton ATPase catalytic subunit A [Homo sapiens]
SmVG_035516	3.59956	4.16757	3.84981	4.39528	3.02153	2.06399	1.85789	2.08161	-0.82717	5e-05	0.0017469	6.34188	5.03542	5.34455	4.79146	2.88058	2.3611	2.29821	2.58197	-0.588885	6.89522e-07	0.000111181	6.83602	4.72325	5.93591	4.29788	2.70189	2.44257	2.19665	2.21677	-0.850633	1.61452e-07	1.775e-05
Smp_194720	2.1552	1.81748	2.1185	2.67687	1.83703	0.984311	0.868331	1.259	-0.825215	0.0011	0.0208745	5.52092	4.83851	4.25009	3.87827	2.3545	2.18418	1.33943	2.39131	-0.655367	0.000226687	0.0100037	3.37988	3.0141	2.88972	2.26521	1.38457	1.34766	0.797589	1.27972	-0.92427	0.000128467	0.00399633	GO:0005737,GO:0007165	hypothetical protein;Smp_194720	Family S33 non-peptidase homologue (S33 family) [Source:UniProtKB/TrEMBL;Acc:G4VGD5]	gi|32130514|ref|NP_071922.2|	protein NDRG3 isoform b [Homo sapiens]
Smp_176770	4.03427	4.78828	2.60243	3.0911	2.23358	1.95849	1.69463	2.33366	-0.820381	5e-05	0.0017469	6.50358	4.71726	2.94918	2.901	2.28096	2.72703	1.5481	1.58855	-0.547651	0.000770101	0.0221942	4.01495	2.73302	1.87983	1.64552	1.40918	1.62387	0.897466	0.81953	-0.822612	0.000247724	0.0063466	GO:0005085,GO:0005622,GO:0007264,GO:0043547	dedicator of cytokinesis protein;Smp_176770	Dock-9, putative [Source:UniProtKB/TrEMBL;Acc:G4LV04]	_	_
Smp_179360	39.17	49.4303	30.5744	32.157	29.0959	21.8997	15.4426	19.2727	-0.820164	5e-05	0.0017469	66.6377	46.3837	35.3146	31.1083	23.3001	21.9739	15.3869	20.917	-0.591954	0.000278585	0.0116019	39.5881	25.972	21.5314	16.7277	13.1738	12.2565	8.46943	10.3045	-0.876341	1.68188e-05	0.000812021	GO:0005794,GO:0006810,GO:0016020,GO:0016021	sortilin;Smp_179360	Sortilin, putative [Source:UniProtKB/TrEMBL;Acc:G4LWE6]	gi|17149834|ref|NP_002950.3|	sortilin isoform 1 preproprotein [Homo sapiens]
Smp_020340	3.31646	3.4731	2.95054	3.85564	2.59171	1.81477	1.49544	1.83365	-0.813577	0.0001	0.00315175	5.66356	4.58902	3.92142	4.13816	2.35268	2.51199	1.62112	2.27401	-0.576702	1.92308e-05	0.00167963	3.7184	2.82559	2.54915	2.51681	1.56648	1.57532	0.999959	1.29006	-0.767062	0.000185337	0.00520216	GO:0000023,GO:0003824,GO:0004553,GO:0004558,GO:0005975,GO:0008152,GO:0016787,GO:0016798,GO:0030246,GO:0032450	alpha glucosidase;Smp_020340	Putative alpha-glucosidase [Source:UniProtKB/TrEMBL;Acc:G4V8C4]	gi|221316699|ref|NP_004659.2|	maltase-glucoamylase, intestinal [Homo sapiens]
Smp_146760	17.522	20.3808	23.4639	14.2604	14.6585	9.13145	11.6198	7.92653	-0.803328	0.0007	0.0153523	31.425	23.4045	28.5037	15.2972	10.2764	9.43192	11.7191	11.0658	-0.646197	0.000214534	0.00981163	20.741	14.7293	19.2913	9.41187	7.17242	6.43185	7.44326	6.45473	-0.854745	8.87841e-06	0.000491003		hypothetical protein;Smp_146760	_	_	_
Smp_126260	12.9219	17.4237	10.7629	7.48741	7.54793	7.28914	6.09625	6.9766	-0.800056	5e-05	0.0017469	18.2697	11.7074	9.02668	5.66322	6.00858	5.85586	4.26467	3.79619	-0.574684	0.00193144	0.0404863	11.0752	6.70943	5.64635	3.12931	3.51138	3.43563	2.43775	1.93795	-0.911665	0.000126619	0.00395683	GO:0004721,GO:0006470,GO:0016787	serine:threonine protein phosphatase 2B;Smp_126260	Serine/threonine-protein phosphatase [Source:UniProtKB/TrEMBL;Acc:G4VPZ6]	gi|6715568|ref|NP_000935.1|	serine/threonine-protein phosphatase 2B catalytic subunit alpha isoform isoform 1 [Homo sapiens]
Smp_175590	5.05359	7.04649	6.97766	4.03453	3.24967	3.17302	3.40816	3.49398	-0.794541	0.0003	0.00788397	8.62928	5.45131	6.68108	3.23755	2.95838	3.51587	2.89247	2.07551	-0.530965	0.000567459	0.0181601	5.14228	3.00913	4.01724	1.74213	1.65008	1.96626	1.55712	1.00262	-0.827377	0.000321412	0.00790534	GO:0000166,GO:0004672,GO:0004713,GO:0005515,GO:0005524,GO:0006468,GO:0016020,GO:0016021,GO:0016301,GO:0016310,GO:0016740,GO:0016772,GO:0018108	proto oncogene tyrosine protein kinase receptor;note=pfam_scan%3BPfam:PF07714.12%3B%3BE()%3D5.0E-74%3Bscore%3D248.5%3Bq uery 583-879%3Bdescription%3DPkinase_Tyr;note=iprscan%3BInterPro:IPR001245 : Tyrosine protein kinase%3BPRINTS:PR00109%3B%3Bscore%3D9.3E-26%3Bquery 737-755%3Bdescription%3DTyrosine protein kinase;note=iprscan%3BInterPro:IPR001245 : Tyrosine protein kinase%3BSMART:SM00219%3B%3Bsco…	Tyrosine kinase [Source:UniProtKB/TrEMBL;Acc:G4V918]	gi|221316639|ref|NP_000132.3|	fibroblast growth factor receptor 2 isoform 1 precursor [Homo sapiens]
Smp_126140	6.96436	8.44902	4.7436	4.68282	4.73113	3.29037	2.83122	3.52736	-0.788583	0.0001	0.00315175	10.8793	7.79631	5.12277	4.00463	3.47668	3.67699	2.77684	2.93147	-0.539651	0.00186357	0.039458	6.65282	4.50661	3.24036	2.26209	2.09478	2.18973	1.60012	1.52485	-0.839134	0.000399534	0.00904653	GO:0007155,GO:0007229,GO:0008305,GO:0016020,GO:0016021	integrin alpha 5;Smp_126140	Alpha integrin receptor 1; Putative integrin alpha [Source:UniProtKB/TrEMBL;Acc:C4PYZ0]	gi|56237029|ref|NP_002196.2|	integrin alpha-5 precursor [Homo sapiens]
SmVG_025466:Smp_129820	8.39837	9.09997	7.60001	7.55595	6.06748	3.94991	4.08552	4.82702	-0.786603	5e-05	0.0017469	11.2725	8.71743	7.45922	6.23596	3.74791	4.99778	3.28235	3.68819	-0.587097	4.55483e-07	8.18373e-05	6.69327	4.85703	4.54659	3.38339	2.13882	2.83591	1.82592	1.83258	-0.838946	1.29108e-06	0.000105189		ATP binding cassette%2C sub family C (CFTR:MRP);Smp_129820	Putative multidrug resistance protein 1 (ATP-binding cassette C1) [Source:UniProtKB/TrEMBL;Acc:G4VS41]	gi|134142345|ref|NP_063953.2|	multidrug resistance-associated protein 1 isoform 3 [Homo sapiens]
SmVG_025466:Smp_189630	8.39837	9.09997	7.60001	7.55595	6.06748	3.94991	4.08552	4.82702	-0.786603	5e-05	0.0017469	11.2725	8.71743	7.45922	6.23596	3.74791	4.99778	3.28235	3.68819	-0.587097	4.55483e-07	8.18373e-05	6.69327	4.85703	4.54659	3.38339	2.13882	2.83591	1.82592	1.83258	-0.838946	1.29108e-06	0.000105189		multidrug resistance protein 1;Smp_189630
Smp_014780	100.087	114.505	92.1985	84.6234	75.8345	52.0999	46.0979	52.9141	-0.786345	5e-05	0.0017469	164.831	126.227	111.195	84.8798	56.1173	59.3638	44.4553	56.417	-0.624727	4.07619e-06	0.00048825	99.0175	71.7751	68.8602	46.7921	32.6796	34.4629	25.2011	28.797	-0.898643	5.24778e-07	4.83697e-05	GO:0003779,GO:0005509,GO:0005515,GO:0051015,GO:0051017,GO:0051764,GO:0070830,GO:1902396	alpha actinin%2C sarcomeric;Smp_014780.2	Putative alpha-actinin [Source:UniProtKB/TrEMBL;Acc:G4VBW4]	gi|4501893|ref|NP_001094.1|	alpha-actinin-2 [Homo sapiens]
SmVG_028674:Smp_163480	14.3782	17.8724	12.2654	17.108	15.0509	7.15978	6.23171	7.30561	-0.785634	5e-05	0.0017469	22.6874	15.7287	12.3863	14.8356	6.79249	7.19457	5.22698	9.29992	-0.663832	0.0019536	0.0407149	14.165	9.36714	8.05844	8.71222	4.22472	4.39914	3.14523	5.08782	-0.912049	0.000465779	0.00985637		hypothetical protein;Smp_163480	Putative uncharacterized protein [Source:UniProtKB/TrEMBL;Acc:G4LXD7]	_	_
SmVG_028674:Smp_163490	14.3782	17.8724	12.2654	17.108	15.0509	7.15978	6.23171	7.30561	-0.785634	5e-05	0.0017469	22.6874	15.7287	12.3863	14.8356	6.79249	7.19457	5.22698	9.29992	-0.663832	0.0019536	0.0407149	14.165	9.36714	8.05844	8.71222	4.22472	4.39914	3.14523	5.08782	-0.912049	0.000465779	0.00985637		hypothetical protein;note=predicted by EVM2;Smp_163490	Putative uncharacterized protein [Source:UniProtKB/TrEMBL;Acc:G4LXD8]	_	_
SmVG_028674:Smp_173110	14.3782	17.8724	12.2654	17.108	15.0509	7.15978	6.23171	7.30561	-0.785634	5e-05	0.0017469	22.6874	15.7287	12.3863	14.8356	6.79249	7.19457	5.22698	9.29992	-0.663832	0.0019536	0.0407149	14.165	9.36714	8.05844	8.71222	4.22472	4.39914	3.14523	5.08782	-0.912049	0.000465779	0.00985637		hypothetical protein;Smp_173110	Putative uncharacterized protein [Source:UniProtKB/TrEMBL;Acc:G4LXD5]	_	_
Smp_042020	58.6322	70.1163	56.819	60.1016	57.1561	28.6396	28.7525	27.9967	-0.7853	0.00015	0.00443311	73.5245	50.784	46.1696	40.9662	22.677	22.6455	20.1606	28.9521	-0.625113	0.000521579	0.0169946	45.434	29.8167	29.6043	23.4849	13.7239	13.5497	11.747	15.2068	-0.873168	4.90987e-05	0.00191362	GO:0016020,GO:0016021,GO:0016787	ectonucleoside triphosphate diphosphohydrolase;Smp_042020	ATP-diphosphohydrolase 1; Putative atp-diphosphohydrolase 1 [Source:UniProtKB/TrEMBL;Acc:Q7YTA4]	_	_
Smp_149330	9.49409	8.66862	5.10325	6.59508	5.41418	4.27093	3.18675	4.51033	-0.780655	5e-05	0.0017469	10.0308	9.40292	4.62247	5.33773	3.81975	4.08778	2.52622	3.20507	-0.563312	0.00214094	0.0427723	6.19598	5.47624	2.94245	3.06399	2.32128	2.43737	1.49788	1.68968	-0.850269	0.000460862	0.00977993	GO:0005509,GO:0005886,GO:0007155,GO:0007156,GO:0016020,GO:0016021	cadherin egf lag seven pass;Smp_149330	Putative cadherin [Source:UniProtKB/TrEMBL;Acc:G4VIB1]	gi|13325064|ref|NP_001399.1|	cadherin EGF LAG seven-pass G-type receptor 2 precursor [Homo sapiens]
Smp_011680	17.9799	21.6399	22.8801	17.1302	15.8146	10.634	9.60695	10.5557	-0.772634	5e-05	0.0017469	36.3517	27.108	31.6045	19.3586	13.9616	14.3767	11.1061	13.9821	-0.576467	4.60066e-05	0.00313961	21.8105	15.2765	19.3199	10.5466	7.95093	8.21366	6.16257	6.95775	-0.832288	2.63164e-06	0.00019846	GO:0007155,GO:0016020,GO:0016021	CD36 class B scavenger receptor;Smp_011680	CD36-like class B scavenger receptor [Source:UniProtKB/TrEMBL;Acc:G4VSZ3]	_	_
Smp_031300	32.8621	35.8691	36.5044	33.31	32.5954	16.3617	17.0628	15.5573	-0.764125	5e-05	0.0017469	36.7689	28.5938	29.5308	23.0739	12.9506	13.2291	12.1845	16.1532	-0.597393	0.000180581	0.00890655	22.7277	17.0568	18.9387	13.2834	8.03248	8.0731	7.11545	8.5675	-0.81804	3.10976e-05	0.00132261	GO:0006950	universal stress protein;Smp_031300	Putative universal stress protein [Source:UniProtKB/TrEMBL;Acc:G4VPM6]	_	_
Smp_033330	39.05	52.9742	48.2636	37.7426	38.3968	22.5444	21.6047	22.3337	-0.763389	5e-05	0.0017469	81.2831	53.2355	60.4594	39.7418	25.9334	26.9117	25.5794	29.4599	-0.570704	0.000260203	0.0109451	50.3756	30.8986	37.3041	21.7917	15.0074	15.4984	14.5156	14.7171	-0.822568	3.51773e-05	0.00145906	GO:0005623,GO:0009055,GO:0015035,GO:0045454,GO:0055114	sh3 domain binding glutamic acid rich;Smp_033330	SH3 domain-binding glutamic acid-rich-like protein [Source:UniProtKB/TrEMBL;Acc:G4M0V9]	gi|4506925|ref|NP_003013.1|	SH3 domain-binding glutamic acid-rich-like protein [Homo sapiens]
SmVG_031401:Smp_076500	2.67866	2.5978	2.57676	1.84497	1.63059	1.22298	1.34649	1.52929	-0.759344	5e-05	0.0017469	3.96588	3.39277	3.20407	1.85676	1.45126	1.89935	1.40408	1.24525	-0.540194	1.02057e-05	0.00107349	2.39968	1.94215	2.00238	1.03628	0.86185	1.11104	0.803766	0.649014	-0.79868	5.58121e-06	0.000356144		dystrophin%2Cs A:C:F:G:H;Smp_076500	Dystrophin-like protein [Source:UniProtKB/TrEMBL;Acc:G4LZH2]	gi|5032311|ref|NP_004013.1|	dystrophin Dp140ab isoform [Homo sapiens]
SmVG_031401:Smp_163360	2.67866	2.5978	2.57676	1.84497	1.63059	1.22298	1.34649	1.52929	-0.759344	5e-05	0.0017469	3.96588	3.39277	3.20407	1.85676	1.45126	1.89935	1.40408	1.24525	-0.540194	1.02057e-05	0.00107349	2.39968	1.94215	2.00238	1.03628	0.86185	1.11104	0.803766	0.649014	-0.79868	5.58121e-06	0.000356144		dystrophin;Smp_163360	Dystrophin, putative [Source:UniProtKB/TrEMBL;Acc:G4LZH1]	gi|5032283|ref|NP_003997.1|	dystrophin Dp427m isoform [Homo sapiens]
SmVG_031401:Smp_187280	2.67866	2.5978	2.57676	1.84497	1.63059	1.22298	1.34649	1.52929	-0.759344	5e-05	0.0017469	3.96588	3.39277	3.20407	1.85676	1.45126	1.89935	1.40408	1.24525	-0.540194	1.02057e-05	0.00107349	2.39968	1.94215	2.00238	1.03628	0.86185	1.11104	0.803766	0.649014	-0.79868	5.58121e-06	0.000356144		hypothetical protein;Smp_187280	Putative uncharacterized protein [Source:UniProtKB/TrEMBL;Acc:G4LZH3]	_	_
Smp_132270	9.3174	11.1816	7.16442	6.87767	4.76584	5.74081	4.37923	5.62398	-0.751996	0.0001	0.00315175	12.513	8.59102	6.04565	4.91419	4.74128	4.88818	3.37489	2.70447	-0.51391	0.000675959	0.0202976	7.76199	5.07973	3.912	2.82747	2.91319	2.96454	1.99734	1.40615	-0.786265	0.000378404	0.00865895	GO:0003676,GO:0003723	poly(rC) binding protein 3;Smp_132270	Putative poly(Rc) binding protien [Source:UniProtKB/TrEMBL;Acc:G4VGP4]	gi|222352151|ref|NP_006187.2|	poly(rC)-binding protein 1 [Homo sapiens]
Smp_154730	5.22686	6.42224	4.02315	4.21829	2.40497	3.17392	2.83512	3.39896	-0.75171	0.0011	0.0208745	6.09228	4.44469	3.11217	2.96537	2.39103	2.68142	2.01987	1.20288	-0.526092	0.000767117	0.0221794	3.81299	2.59398	2.09561	1.61073	1.40784	1.58986	1.14319	0.68299	-0.797127	0.000521832	0.0107005	GO:0000166,GO:0003676	rna binding protein musashi;note=pfam_scan%3BPfam:PF00076.17%3B%3BE()%3D2.1E-16%3Bscore%3D59.1%3Bqu ery 81-140%3Bdescription%3DRRM_1;note=pfam_scan%3BPfam:PF00076.17%3B%3BE()%3D2.2E-19%3Bscore%3D68.7%3Bqu ery 171-236%3Bdescription%3DRRM_1;note=iprscan%3BInterPro:IPR000504 : RNA recognition motif%2C RNP-1%3BSMART:SM00360%3B%3Bscore%3D1.1E-24%3Bquery 170-242%3Bdescription%3DRNA recognition motif%2C…
Smp_136470	5.82921	6.60304	3.67169	5.09957	4.29021	3.36292	2.21447	2.81838	-0.741069	0.00215	0.0330718	9.05026	6.77841	4.2747	4.98161	3.60279	3.34272	2.3056	3.06294	-0.519773	0.00193532	0.0404999	5.50585	3.94392	2.74029	2.79077	2.24013	2.05953	1.39276	1.56965	-0.719196	0.000558252	0.0111467	GO:0005089,GO:0005622,GO:0035023,GO:0043547	pleckstrin y domain containing family G;Smp_136470	Putative rho/rac guanine nucleotide exchange factor [Source:UniProtKB/TrEMBL;Acc:G4VT51]	gi|111154084|ref|NP_941374.2|	pleckstrin homology domain-containing family G member 5 isoform b [Homo sapiens]
Smp_001390	15.1357	19.6601	13.1792	10.437	10.8886	7.95611	8.18354	7.99416	-0.737985	5e-05	0.0017469	22.8613	15.7838	13.8114	8.52936	8.53354	8.72999	7.467	6.70627	-0.44281	0.00231136	0.0444496	13.647	8.78036	8.26553	4.56592	4.82602	4.91736	4.11177	3.32484	-0.70204	0.000563323	0.011199		nck associated protein 1;Smp_001390	Putative uncharacterized protein [Source:UniProtKB/TrEMBL;Acc:G4VDW3]	gi|34485727|ref|NP_005328.2|	nck-associated protein 1-like isoform 1 [Homo sapiens]
SmVG_018828:Smp_057950	148.991	159.262	137.178	109.094	90.1613	85.0928	69.7995	87.7498	-0.736582	5e-05	0.0017469	212.968	172.892	153.534	100.909	87.8083	94.9793	64.2681	62.0767	-0.546745	4.98218e-07	8.70289e-05	124.857	95.0107	91.8589	53.2963	49.1677	52.8464	34.7333	29.905	-0.812895	4.91147e-07	4.57318e-05		hypothetical protein;Smp_057950
SmVG_018828:Smp_153310	148.991	159.262	137.178	109.094	90.1613	85.0928	69.7995	87.7498	-0.736582	5e-05	0.0017469	212.968	172.892	153.534	100.909	87.8083	94.9793	64.2681	62.0767	-0.546745	4.98218e-07	8.70289e-05	124.857	95.0107	91.8589	53.2963	49.1677	52.8464	34.7333	29.905	-0.812895	4.91147e-07	4.57318e-05		cell polarity protein%3B lethal giant larvae;Smp_153310	Cell polarity protein [Source:UniProtKB/TrEMBL;Acc:G4VK20]	gi|62912476|ref|NP_004131.3|	lethal(2) giant larvae protein homolog 1 [Homo sapiens]
SmVG_018828:Smp_153310.2	148.991	159.262	137.178	109.094	90.1613	85.0928	69.7995	87.7498	-0.736582	5e-05	0.0017469	212.968	172.892	153.534	100.909	87.8083	94.9793	64.2681	62.0767	-0.546745	4.98218e-07	8.70289e-05	124.857	95.0107	91.8589	53.2963	49.1677	52.8464	34.7333	29.905	-0.812895	4.91147e-07	4.57318e-05		cell polarity protein%3B lethal giant larvae;Smp_153310.2
SmVG_018828:Smp_153320	148.991	159.262	137.178	109.094	90.1613	85.0928	69.7995	87.7498	-0.736582	5e-05	0.0017469	212.968	172.892	153.534	100.909	87.8083	94.9793	64.2681	62.0767	-0.546745	4.98218e-07	8.70289e-05	124.857	95.0107	91.8589	53.2963	49.1677	52.8464	34.7333	29.905	-0.812895	4.91147e-07	4.57318e-05		lethal(2) giant larvae protein 2;Smp_153320	Putative uncharacterized protein [Source:UniProtKB/TrEMBL;Acc:G4VK22]	_	_
Smp_170550	30.6521	38.759	30.7468	22.6932	21.1411	17.5219	18.1801	17.0479	-0.733441	5e-05	0.0017469	82.5209	57.1016	56.8217	33.272	30.4454	30.1318	29.0206	22.7317	-0.508886	9.46612e-05	0.00529135	49.8922	32.6389	35.2769	18.517	17.9038	17.5547	16.5364	11.6222	-0.777038	4.71094e-06	0.000316083		granulin;Smp_170550.2	Putative granulin [Source:UniProtKB/TrEMBL;Acc:G4V750]	gi|4504151|ref|NP_002078.1|	granulins precursor [Homo sapiens]
Smp_039870	5.44996	7.38405	5.9502	4.33755	3.80681	3.47542	3.18752	3.45533	-0.731566	5e-05	0.0017469	13.1857	8.76944	8.62854	5.55793	5.12569	5.00521	4.25578	3.66974	-0.492648	2.85987e-05	0.00229548	7.77455	4.95659	5.2989	3.04834	2.91398	2.94997	2.3997	1.82529	-0.745891	2.86869e-05	0.00125248	GO:0005515	vasodilator stimulated phosphoprotein;Smp_039870	Putative vasodilator-stimulated phosphoprotein [Source:UniProtKB/TrEMBL;Acc:C4Q805]	_	_
Smp_143840	112.498	124.703	107.643	94.5887	89.0103	62.1901	51.884	61.843	-0.730043	5e-05	0.0017469	204.247	161.372	152.873	109.532	82.9686	86.1121	64.4794	78.0207	-0.51803	1.70405e-05	0.00151999	121.371	90.3538	93.168	59.1793	47.509	48.8001	35.5895	38.4573	-0.748	6.01313e-06	0.000378503	GO:0004645,GO:0005737,GO:0005975,GO:0005980,GO:0008184,GO:0016740,GO:0016757,GO:0030170	glycogen phosphorylase;Smp_143840	Putative glycogen phosphorylase [Source:UniProtKB/TrEMBL;Acc:G4VSJ5]	gi|21361370|ref|NP_002853.2|	glycogen phosphorylase, brain form [Homo sapiens]
Smp_179660	14.5983	17.1586	10.2336	12.6479	9.09456	8.72417	7.27317	7.88707	-0.728366	5e-05	0.0017469	19.7508	14.3325	9.61561	9.88094	8.06745	7.52625	6.05016	5.38888	-0.488498	6.88815e-05	0.00428872	11.8123	8.13718	5.8921	5.42047	4.65454	4.35566	3.32233	2.67239	-0.755059	2.74601e-05	0.00122231	GO:0016020,GO:0016021	hypothetical protein;note=predicted by EVM2;note=tmhmm%3B%3Bquery 1-905%3B;note=%3Bquery 85-137%3B;note=%3Bquery 467-485%3B;note=%3Bquery 860-905%3B;note=%3Bquery 62-84%3B;note=%3Bquery 138-160%3B;note=%3Bquery 444-466%3B;note=%3Bquery 486-508%3B;note=%3Bquery 837-859%3B;note=%3Bquery 1-61%3B;note=%3Bquery 161-443%3B;note=%3Bquery 509-836%3B;Smp_179660	Putative uncharacterized protein [Source:UniProtKB/TrEMBL;Acc:G4VDS9]	_	_
Smp_065290	11.8554	16.345	8.36863	10.0757	7.19337	7.59539	6.89678	6.51755	-0.725864	5e-05	0.0017469	20.3548	13.0748	9.35175	8.26221	8.12584	7.41793	6.5507	4.50957	-0.444797	0.00209967	0.0424558	12.6127	7.67518	5.95131	4.703	4.84487	4.44968	3.78808	2.37783	-0.699667	0.00135305	0.0211413	GO:0000166,GO:0004672,GO:0004674,GO:0004683,GO:0005524,GO:0006468,GO:0016301,GO:0016310,GO:0016740,GO:0016772	calcium:calmodulin dependent protein kinase I;Smp_065290	Putative calcium/calmodulin-dependent protein kinase [Source:UniProtKB/TrEMBL;Acc:G4VCT2]	gi|83776596|ref|NP_076951.2|	caM kinase-like vesicle-associated protein [Homo sapiens]
SmVG_024781:Smp_043390	5.23023	5.174	4.93099	5.74349	4.09105	2.63157	2.75369	3.29999	-0.722316	5e-05	0.0017469	6.8901	5.63926	4.78803	4.69602	2.76823	3.44767	2.44089	2.57058	-0.507939	2.83563e-08	6.729e-06	4.14714	3.20608	2.96892	2.58995	1.60757	1.9963	1.36851	1.29276	-0.739741	2.29847e-07	2.43878e-05		beta D xylosidase 2;Smp_043390	Putative uncharacterized protein [Source:UniProtKB/TrEMBL;Acc:G4VRX3]	_	_
SmVG_024781:Smp_145550	5.23023	5.174	4.93099	5.74349	4.09105	2.63157	2.75369	3.29999	-0.722316	5e-05	0.0017469	6.8901	5.63926	4.78803	4.69602	2.76823	3.44767	2.44089	2.57058	-0.507939	2.83563e-08	6.729e-06	4.14714	3.20608	2.96892	2.58995	1.60757	1.9963	1.36851	1.29276	-0.739741	2.29847e-07	2.43878e-05		sister chromatid cohesion protein dcc1;Smp_145550	Dcc1-related [Source:UniProtKB/TrEMBL;Acc:G4VRX4]	_	_
SmVG_024781:Smp_145560	5.23023	5.174	4.93099	5.74349	4.09105	2.63157	2.75369	3.29999	-0.722316	5e-05	0.0017469	6.8901	5.63926	4.78803	4.69602	2.76823	3.44767	2.44089	2.57058	-0.507939	2.83563e-08	6.729e-06	4.14714	3.20608	2.96892	2.58995	1.60757	1.9963	1.36851	1.29276	-0.739741	2.29847e-07	2.43878e-05		oxalate:formate antiporter;Smp_145560	Putative oxalate:formate antiporter [Source:UniProtKB/TrEMBL;Acc:G4VRX1]	_	_
Smp_156770	69.1029	85.2989	68.4436	61.71	56.8517	36.2857	41.423	38.1015	-0.72076	5e-05	0.0017469	122.151	89.9941	82.245	62.8335	43.3393	45.4171	42.4121	44.4652	-0.51675	3.96754e-05	0.00293528	72.9691	50.5805	49.9544	33.7658	24.5308	25.6999	23.301	21.8344	-0.750812	4.98501e-06	0.000327253		major tegumental antigen SM15;Smp_156770	Major tegumental antigen SM15; Putative major tegumental antigen SM15 [Source:UniProtKB/TrEMBL;Acc:Q05645]	_	_
Smp_149270	3.22121	3.93569	2.19202	3.38098	1.92643	1.88145	2.04249	1.90215	-0.715484	0.0013	0.023022	4.38655	3.0033	1.90209	2.44093	1.55664	1.64527	1.46803	1.03062	-0.523826	0.000628513	0.019382	2.6841	1.74058	1.1982	1.3714	0.922712	0.978396	0.868132	0.549821	-0.790163	0.000752132	0.0138371		hypothetical protein;Smp_149270	Putative uncharacterized protein [Source:UniProtKB/TrEMBL;Acc:G4VIA0]	_	_
SmVG_018907:Smp_159230	7.29997	8.30603	5.86555	6.83191	4.13574	4.45723	4.63321	4.02878	-0.713967	5e-05	0.0017469	10.0141	7.998	5.83996	5.4948	4.00098	4.11293	4.12858	2.73925	-0.49349	6.57905e-07	0.000110326	6.61337	4.85063	4.28335	3.57306	2.89087	2.8343	2.69539	1.61877	-0.642677	2.20726e-06	0.000171347		synaptic vesicle membrane protein VAT 1;Smp_159230	Putative quinone oxidoreductase [Source:UniProtKB/TrEMBL;Acc:G4VKE4]	gi|18379349|ref|NP_006364.2|	synaptic vesicle membrane protein VAT-1 homolog [Homo sapiens]
SmVG_018907:Smp_159240	7.29997	8.30603	5.86555	6.83191	4.13574	4.45723	4.63321	4.02878	-0.713967	5e-05	0.0017469	10.0141	7.998	5.83996	5.4948	4.00098	4.11293	4.12858	2.73925	-0.49349	6.57905e-07	0.000110326	6.61337	4.85063	4.28335	3.57306	2.89087	2.8343	2.69539	1.61877	-0.642677	2.20726e-06	0.000171347		hypothetical protein;Smp_159240	Putative uncharacterized protein [Source:UniProtKB/TrEMBL;Acc:G4VKE3]	_	_
SmVG_018907:Smp_159260	7.29997	8.30603	5.86555	6.83191	4.13574	4.45723	4.63321	4.02878	-0.713967	5e-05	0.0017469	10.0141	7.998	5.83996	5.4948	4.00098	4.11293	4.12858	2.73925	-0.49349	6.57905e-07	0.000110326	6.61337	4.85063	4.28335	3.57306	2.89087	2.8343	2.69539	1.61877	-0.642677	2.20726e-06	0.000171347		protein broad minded;Smp_159260	Putative uncharacterized protein [Source:UniProtKB/TrEMBL;Acc:G4VKE2]	_	_
SmVG_035501	15.3002	17.6104	23.2233	14.3281	14.0154	9.34575	9.57011	10.1106	-0.711105	0.0038	0.0477064	20.0551	16.2403	20.9988	11.9312	9.31372	10.0104	7.23639	8.07247	-0.51262	3.16783e-05	0.00244429	13.625	9.90537	15.2103	7.27448	5.64556	6.31241	4.82562	4.63383	-0.77612	8.01397e-06	0.000451404	GO:0004252,GO:0006508
Smp_181270	3.80596	4.07678	2.73773	4.69711	3.1564	2.04138	1.8065	2.36332	-0.709439	0.00015	0.00443311	4.79489	3.97462	2.8756	4.13537	2.26057	2.53293	1.74929	2.06571	-0.435183	0.0018425	0.0392631	3.00729	2.3756	1.84636	2.40143	1.37983	1.49031	1.04104	1.08825	-0.654985	0.00124835	0.0199495		protein couch potato;Smp_181270.2	Putative uncharacterized protein [Source:UniProtKB/TrEMBL;Acc:G4VGC7]	_	_
Smp_105410	133.206	149.185	129.579	102.93	104.234	75.1918	64.0878	72.6322	-0.703706	5e-05	0.0017469	195.467	145.034	129.257	83.5506	72.1567	72.456	54.5047	63.3742	-0.538594	0.000165968	0.00839015	116.781	81.269	78.9425	45.1814	41.415	41.1435	30.0702	31.3946	-0.802273	9.85137e-06	0.000538286	GO:0005215,GO:0006810,GO:0016020,GO:0016021,GO:0022857,GO:0022891,GO:0055085	glucose transport protein;Smp_105410	Putative glucose transport protein [Source:UniProtKB/TrEMBL;Acc:G4VC44]	gi|4557851|ref|NP_000331.1|	solute carrier family 2, facilitated glucose transporter member 2 [Homo sapiens]
Smp_205540	27.3787	34.2602	35.0648	23.6235	17.5405	15.704	23.6466	17.2709	-0.698209	0.00045	0.010904	39.4855	25.8238	35.2548	18.9423	16.1118	17.0953	14.8914	12.3553	-0.462895	0.00162978	0.0368664	50.3805	35.3406	44.5757	20.8192	19.4639	21.5797	22.8692	11.3057	-0.682722	0.000662683	0.0125717		hypothetical protein;Smp_205540
Smp_105220	258.229	333.379	252.95	182.821	177.04	174.447	125.73	159.74	-0.6897	5e-05	0.0017469	591.09	397.255	361.372	213.041	220.076	206.099	141.605	148.414	-0.568183	0.000477771	0.0162843	360.361	227.534	224.86	117.388	128.248	119.077	80.097	75.1815	-0.867237	2.74303e-05	0.00122231		hypothetical protein;Smp_105220	DIF_5 [Source:UniProtKB/TrEMBL;Acc:B8Y6H3]	_	_
SmVG_002760:Smp_172990	13.2714	15.7058	9.94005	10.6036	10.4703	6.94676	6.41281	6.88301	-0.689194	5e-05	0.0017469	18.1564	13.3856	9.56149	8.7634	6.42746	6.8246	5.59213	6.12917	-0.487166	0.000496145	0.0166164	11.3136	7.83252	6.10927	5.05974	3.88534	4.12648	3.26622	3.23967	-0.732359	0.000145921	0.00428182		leucine rich repeat containing protein 68;Smp_172990	Putative leucine rich repeat-containing [Source:UniProtKB/TrEMBL;Acc:G4V9Z8]	_	_
SmVG_002760:Smp_173000	13.2714	15.7058	9.94005	10.6036	10.4703	6.94676	6.41281	6.88301	-0.689194	5e-05	0.0017469	18.1564	13.3856	9.56149	8.7634	6.42746	6.8246	5.59213	6.12917	-0.487166	0.000496145	0.0166164	11.3136	7.83252	6.10927	5.05974	3.88534	4.12648	3.26622	3.23967	-0.732359	0.000145921	0.00428182		r specific enoyl coenzyme a hydratase;Smp_173000	Putative r-specific enoyl-CoA hydratase [Source:UniProtKB/TrEMBL;Acc:G4V9Z7]	_	_
SmVG_014595:Smp_210600	8.77908	10.6824	8.70295	7.65282	6.63812	5.08359	5.302	5.21048	-0.687876	5e-05	0.0017469	11.8628	8.39613	7.8433	5.73102	4.37085	4.65163	4.06117	3.79115	-0.501652	2.10927e-06	0.000276336	7.38123	5.0258	5.03499	3.35959	2.63508	2.78149	2.45638	2.02979	-0.753561	3.27788e-06	0.000237386		aspartyl aminopeptidase (M18 family);Smp_210600	Aspartyl aminopeptidase (M18 family) [Source:UniProtKB/TrEMBL;Acc:G4LVY6]	_	_
SmVG_014595:Smp_210610	8.77908	10.6824	8.70295	7.65282	6.63812	5.08359	5.302	5.21048	-0.687876	5e-05	0.0017469	11.8628	8.39613	7.8433	5.73102	4.37085	4.65163	4.06117	3.79115	-0.501652	2.10927e-06	0.000276336	7.38123	5.0258	5.03499	3.35959	2.63508	2.78149	2.45638	2.02979	-0.753561	3.27788e-06	0.000237386		aspartyl aminopeptidase;note=iprscan%3BInterPro:IPR001948 : Peptidase M18%2C aminopeptidase I%3BPRINTS:PR00932%3B%3Bscore%3D5.3E-31%3Bquery 311-329%3Bdescription%3DPeptidase M18%2C aminopeptidase I;note=iprscan%3BInterPro:IPR001948 : Peptidase M18%2C aminopeptidase I%3BPRINTS:PR00932%3B%3Bscore%3D5.3E-31%3Bquery 86-102%3Bdescription%3DPeptidase M18%2C aminopeptidase I;note=iprscan%3BInterPro:IPR0…	Putative uncharacterized protein Smp_210610 [Source:UniProtKB/TrEMBL;Acc:G4LVY7]	gi|156416028|ref|NP_036232.2|	aspartyl aminopeptidase [Homo sapiens]
Smp_010280	10.2354	12.5118	16.2667	9.78459	9.03085	6.36854	8.19059	6.70909	-0.687563	0.00015	0.00443311	39.5208	25.4631	32.4747	18.3384	12.7619	14.2352	15.1814	12.6187	-0.544302	0.000238396	0.0104122	23.8142	14.2894	19.9003	9.94818	7.27909	7.90363	8.28913	6.22185	-0.815892	1.44943e-05	0.000730722	GO:0016787,GO:0047372	monoacylglycerol lipase abhd12;note=iprscan%3BInterPro:IPR003140 : Phospholipase/carboxylesterase%3BPfam:PF02230%3B%3Bscore%3D2.3E-6 %3Bquery 261-310%3Bdescription%3DPhospholipase/carboxylesterase;note=iprscan%3BPANTHER:PTHR12277%3B%3Bscore%3D1.4E-57%3Bquery 55-341%3Bdescription%3Dnull;note=iprscan%3BSuperfamily:SSF53474%3B%3Bscore%3D2.8E-31%3Bquery 105-334%3Bdescription%3Dnull;note=iprscan%3BPAN…	Putative uncharacterized protein Smp_010280 [Source:UniProtKB/TrEMBL;Acc:G4LUH2]	gi|32528310|ref|NP_861535.1|	abhydrolase domain-containing protein 12B isoform c [Homo sapiens]
Smp_134430	5.94451	6.40785	5.73167	5.66877	4.49973	3.63287	2.35789	4.2756	-0.68581	0.0001	0.00315175	8.7784	6.86497	5.9899	5.45689	3.8403	4.5447	2.23477	3.1201	-0.532911	0.000211194	0.0097273	5.35361	3.94424	3.78274	3.07077	2.24243	2.65851	1.30253	1.60032	-0.757751	5.41892e-05	0.00206894	GO:0003677,GO:0003700,GO:0004222,GO:0005509,GO:0005515,GO:0005634,GO:0006355,GO:0006508,GO:0008233,GO:0008237,GO:0008270,GO:0016787,GO:0043565,GO:0046872	bone morphogenetic protein;Smp_134430	Putative tolloid [Source:UniProtKB/TrEMBL;Acc:G4VQ02]	gi|22547221|ref|NP_036596.3|	tolloid-like protein 1 isoform 1 precursor [Homo sapiens]
SmVG_001354:Smp_214180	32.2918	34.6181	32.461	31.7623	28.3332	18.0321	17.0901	18.2855	-0.681902	5e-05	0.0017469	51.6976	40.9071	38.4798	32.6291	19.9709	20.927	16.357	21.8643	-0.5556	4.38362e-05	0.003088	31.1805	23.3131	23.8088	17.9538	11.6354	12.1129	9.24911	11.0899	-0.778601	6.96598e-06	0.000410094		calpain;Smp_214180
SmVG_001354:Smp_214190	32.2918	34.6181	32.461	31.7623	28.3332	18.0321	17.0901	18.2855	-0.681902	5e-05	0.0017469	51.6976	40.9071	38.4798	32.6291	19.9709	20.927	16.357	21.8643	-0.5556	4.38362e-05	0.003088	31.1805	23.3131	23.8088	17.9538	11.6354	12.1129	9.24911	11.0899	-0.778601	6.96598e-06	0.000410094		calpain;Smp_214190
SmVG_022153:Smp_033130	12.2838	13.4907	12.2397	9.3035	7.71499	7.12143	7.61217	7.16596	-0.676076	0.0001	0.00315175	17.8574	13.3463	12.8966	8.0853	6.80232	7.14811	6.42893	5.04674	-0.526252	5.25837e-07	9.05952e-05	10.6944	7.53194	7.90431	4.3985	3.93238	4.09112	3.57236	2.51755	-0.793936	1.84809e-07	1.98398e-05		hypothetical protein;note=predicted by EVM2;Smp_033130	Putative uncharacterized protein [Source:UniProtKB/TrEMBL;Acc:G4VMX9]	_	_
SmVG_022153:Smp_140020	12.2838	13.4907	12.2397	9.3035	7.71499	7.12143	7.61217	7.16596	-0.676076	0.0001	0.00315175	17.8574	13.3463	12.8966	8.0853	6.80232	7.14811	6.42893	5.04674	-0.526252	5.25837e-07	9.05952e-05	10.6944	7.53194	7.90431	4.3985	3.93238	4.09112	3.57236	2.51755	-0.793936	1.84809e-07	1.98398e-05		hypothetical protein;note=predicted by EVM2;Smp_140020	Putative uncharacterized protein [Source:UniProtKB/TrEMBL;Acc:G4VMX8]	_	_
Smp_011270	563.206	573.915	659.406	459.417	465.759	331.185	274.868	343.401	-0.672713	5e-05	0.0017469	996.836	876.153	995.352	568.683	481.222	529.443	356.583	443.075	-0.455103	0.000804469	0.0229411	616.635	512.022	629.029	320.46	287.995	312.268	205.165	229.769	-0.661296	0.000218363	0.00582621		sj ts4 protein;Smp_011270.2	Putative sj-Ts4 protein [Source:UniProtKB/TrEMBL;Acc:G4VD83]	_	_
Smp_000260	305.947	329.886	298.983	274.881	269.008	177.164	137.9	175.225	-0.671909	5e-05	0.0017469	454.086	357.27	327.715	252.041	181.256	182.882	124.85	183.525	-0.551299	0.000243498	0.0105968	269.552	199.751	198.967	134.932	102.767	102.929	68.4152	89.7827	-0.77618	6.1353e-05	0.00226658	GO:0001664,GO:0005737,GO:0005764,GO:0006629,GO:0006665,GO:0008047,GO:0043085	proactivator polypeptide;Smp_000260	Saposin containing protein [Source:UniProtKB/TrEMBL;Acc:G4LVS4]	gi|110224476|ref|NP_001035930.1|	proactivator polypeptide isoform b preproprotein [Homo sapiens]
Smp_160620	21.6549	27.7962	21.1846	22.5782	20.3872	14.2004	11.0446	12.9034	-0.671232	5e-05	0.0017469	41.2447	28.0184	23.8229	21.7473	13.508	13.4505	9.98121	13.7889	-0.62921	5.06961e-05	0.00335581	26.4013	17.0222	16.8523	13.1732	9.41894	9.15727	6.66908	8.03923	-0.802454	1.4434e-05	0.000730722	GO:0004222,GO:0006508,GO:0008237,GO:0016020,GO:0016021	subfamily M12B unassigned peptidase;Smp_160620.2	Subfamily M12B unassigned peptidase (M12 family) [Source:UniProtKB/TrEMBL;Acc:C4QGD8]	gi|4501915|ref|NP_003807.1|	disintegrin and metalloproteinase domain-containing protein 9 precursor [Homo sapiens]
Smp_211150	18.3842	21.4709	19.1318	15.9205	14.8563	10.0481	10.655	11.4866	-0.671035	5e-05	0.0017469	23.0625	17.0184	16.7498	11.8419	8.74328	10.1441	7.8739	8.02935	-0.49278	2.39581e-06	0.000304364	14.4283	9.88699	10.6232	6.6831	5.221	6.10544	4.72354	4.16061	-0.706265	6.2521e-06	0.000382889	GO:0004386,GO:0005515	MAGUK p55 subfamily;Smp_211150	ATP-dependent RNA helicase, putative [Source:UniProtKB/TrEMBL;Acc:G4LUN8]	gi|111154074|ref|NP_775767.2|	MAGUK p55 subfamily member 7 [Homo sapiens]
SmVG_031568:Smp_005360	4.01429	4.90375	3.86968	4.50906	3.49225	2.17412	2.6966	2.54423	-0.665223	0.0005	0.011737	7.53655	5.45241	4.89588	4.37753	2.77157	3.32202	2.90057	2.45945	-0.484758	7.69497e-05	0.00456508	4.66148	3.20144	3.04886	2.58433	1.66226	2.01868	1.67697	1.37973	-0.691973	6.28616e-05	0.00231295		hypothetical protein;note=predicted by EVM2;Smp_005360	Putative uncharacterized protein [Source:UniProtKB/TrEMBL;Acc:G4LZK3]	_	_
SmVG_031568:Smp_124970	4.01429	4.90375	3.86968	4.50906	3.49225	2.17412	2.6966	2.54423	-0.665223	0.0005	0.011737	7.53655	5.45241	4.89588	4.37753	2.77157	3.32202	2.90057	2.45945	-0.484758	7.69497e-05	0.00456508	4.66148	3.20144	3.04886	2.58433	1.66226	2.01868	1.67697	1.37973	-0.691973	6.28616e-05	0.00231295		Phosphatidylinositol 4 phosphate 5 kinase type 1;Smp_124970	Phosphatidylinositol-4-phosphate 5-kinase type I, putative [Source:UniProtKB/TrEMBL;Acc:G4LZK4]	gi|31317309|ref|NP_036530.1|	phosphatidylinositol-4-phosphate 5-kinase type-1 gamma isoform 2 [Homo sapiens]
Smp_163520	84.9615	100.993	111.267	68.4093	66.5667	53.3142	60.6805	50.2	-0.663988	5e-05	0.0017469	104.121	75.3667	93.5236	48.1355	43.2558	42.4317	44.4706	35.8803	-0.453414	0.000862259	0.0239926	64.8153	44.4444	60.182	27.6773	26.2051	25.4618	26.2759	19.1236	-0.68643	5.29575e-05	0.00203041		hypothetical protein;Smp_163520	Putative uncharacterized protein [Source:UniProtKB/TrEMBL;Acc:G4LXE1]	_	_
Smp_073280	10.9137	12.9648	9.63373	9.69561	7.51586	7.24458	6.68942	5.88564	-0.660516	5e-05	0.0017469	13.344	10.2943	9.00384	7.05422	6.31192	5.71824	5.19817	4.12881	-0.440914	4.49174e-05	0.00310399	8.27382	5.84997	5.48298	3.84868	3.68371	3.20419	2.97561	2.07663	-0.670921	3.12148e-05	0.00132261	GO:0016020,GO:0016021	hypothetical protein;Smp_073280	Putative uncharacterized protein [Source:UniProtKB/TrEMBL;Acc:G4VA88]	_	_
SmVG_008325:Smp_146060	24.2233	24.6832	18.1248	21.3311	16.6777	12.986	9.7977	16.5298	-0.658232	0.00295	0.0409727	35.8398	30.5867	23.8007	20.3836	16.4477	20.6504	11.4131	12.6921	-0.432197	0.000185883	0.00906144	21.8073	17.334	14.7303	11.1224	9.51117	11.9746	6.42253	6.35162	-0.623901	0.000113018	0.00361855		Ral GTPase activating protein subunit alpha 1;Smp_146060	Putative tuberin [Source:UniProtKB/TrEMBL;Acc:G4VDA7]	gi|118600961|ref|NP_065076.2|	ral GTPase-activating protein subunit alpha-2 [Homo sapiens]
SmVG_008325:Smp_146070	24.2233	24.6832	18.1248	21.3311	16.6777	12.986	9.7977	16.5298	-0.658232	0.00295	0.0409727	35.8398	30.5867	23.8007	20.3836	16.4477	20.6504	11.4131	12.6921	-0.432197	0.000185883	0.00906144	21.8073	17.334	14.7303	11.1224	9.51117	11.9746	6.42253	6.35162	-0.623901	0.000113018	0.00361855		hypothetical protein;Smp_146070	Putative uncharacterized protein [Source:UniProtKB/TrEMBL;Acc:G4VDA8]	_	_
Smp_050220	40.8461	50.4993	31.9519	29.1779	22.4001	25.6791	25.9865	22.7362	-0.655469	5e-05	0.0017469	67.0298	44.5608	32.8375	27.3565	25.9837	22.6206	22.7864	14.3107	-0.492744	0.000517624	0.0169946	40.1837	25.6618	20.5384	15.3463	15.0167	13.25	12.7317	7.44579	-0.76023	4.68256e-05	0.00186587	GO:0006836,GO:0019905	complexin;Smp_050220	Complexin, putative [Source:UniProtKB/TrEMBL;Acc:G4LWK6]	_	_
Smp_199210	6.86089	9.27068	5.58827	5.72903	5.19794	4.18838	3.6173	4.45277	-0.652993	0.00095	0.0189874	16.8333	10.4688	8.24678	6.99183	5.84837	5.63983	4.62453	4.57474	-0.502552	0.000413309	0.014879	10.1158	5.96941	5.29013	3.93906	3.43302	3.31042	2.68959	2.41743	-0.778036	0.000360128	0.00839944	GO:0000166,GO:0005388,GO:0005524,GO:0005887,GO:0006810,GO:0006811,GO:0006812,GO:0006816,GO:0016020,GO:0016021,GO:0016787,GO:0019829,GO:0030165,GO:0043231,GO:0046872,GO:0051480,GO:0070588	plasma membrane calcium transporting ATPase;Smp_199210	Plasma membrane calcium-transporting atpase,putative [Source:UniProtKB/TrEMBL;Acc:G4M1H5]	gi|48255951|ref|NP_001001331.1|	plasma membrane calcium-transporting ATPase 2 isoform 1 [Homo sapiens]
Smp_149130	11.784	11.4327	10.0525	9.1732	7.20556	7.78	4.46141	7.56013	-0.652169	0.0001	0.00315175	16.6938	14.4352	12.1022	9.71326	8.54636	9.25958	5.25511	6.48378	-0.421258	0.000392763	0.0144862	10.0726	8.15278	7.36905	5.2526	4.88752	5.26788	2.90108	3.16141	-0.610291	0.000920579	0.0160925	GO:0003779,GO:0005509,GO:0005515	fimbrin:plastin;Smp_149130	Putative fimbrin/plastin [Source:UniProtKB/TrEMBL;Acc:G4VH98]	gi|167614506|ref|NP_002289.2|	plastin-2 [Homo sapiens]
Smp_124980	22.319	24.0536	21.4971	17.5882	14.679	14.5006	11.8544	13.4732	-0.648767	0.0011	0.0208745	25.6685	19.4536	17.7666	11.8543	11.1557	10.8628	8.50953	7.11915	-0.490901	0.000317586	0.0126401	16.5081	11.8411	11.8912	7.19303	7.18901	6.89786	5.39983	4.07251	-0.735508	0.000135616	0.00410156	GO:0005737	Tumor necrosis factor%2C alpha induced protein;Smp_124980	Tumor necrosis factor induced protein, putative [Source:UniProtKB/TrEMBL;Acc:G4LZK5]	_	_
SmVG_032736:Smp_039130	33.5068	38.5733	32.8317	30.189	26.1775	20.8462	18.8805	20.3014	-0.648184	5e-05	0.0017469	59.1948	43.589	39.4878	30.1363	24.3653	25.1926	19.1764	19.3255	-0.486449	3.92545e-07	7.36872e-05	35.8243	24.9368	24.544	16.6603	14.1749	14.4496	10.7168	9.74048	-0.726491	4.12534e-07	3.96249e-05		Niemann Pick C1 protein;Smp_039130	Niemann-pick C1 (NPC1) [Source:UniProtKB/TrEMBL;Acc:G4M0J8]	gi|255652944|ref|NP_000262.2|	Niemann-Pick C1 protein precursor [Homo sapiens]
SmVG_032736:Smp_177270	33.5068	38.5733	32.8317	30.189	26.1775	20.8462	18.8805	20.3014	-0.648184	5e-05	0.0017469	59.1948	43.589	39.4878	30.1363	24.3653	25.1926	19.1764	19.3255	-0.486449	3.92545e-07	7.36872e-05	35.8243	24.9368	24.544	16.6603	14.1749	14.4496	10.7168	9.74048	-0.726491	4.12534e-07	3.96249e-05		Niemann Pick C1 protein;Smp_177270	Putative uncharacterized protein [Source:UniProtKB/TrEMBL;Acc:G4M0J9]	_	_
SmVG_032736:Smp_188720	33.5068	38.5733	32.8317	30.189	26.1775	20.8462	18.8805	20.3014	-0.648184	5e-05	0.0017469	59.1948	43.589	39.4878	30.1363	24.3653	25.1926	19.1764	19.3255	-0.486449	3.92545e-07	7.36872e-05	35.8243	24.9368	24.544	16.6603	14.1749	14.4496	10.7168	9.74048	-0.726491	4.12534e-07	3.96249e-05		Niemann Pick C1 protein;Smp_188720	Putative uncharacterized protein [Source:UniProtKB/TrEMBL;Acc:G4M0K1]	gi|255652944|ref|NP_000262.2|	Niemann-Pick C1 protein precursor [Homo sapiens]
SmVG_032736:Smp_188730	33.5068	38.5733	32.8317	30.189	26.1775	20.8462	18.8805	20.3014	-0.648184	5e-05	0.0017469	59.1948	43.589	39.4878	30.1363	24.3653	25.1926	19.1764	19.3255	-0.486449	3.92545e-07	7.36872e-05	35.8243	24.9368	24.544	16.6603	14.1749	14.4496	10.7168	9.74048	-0.726491	4.12534e-07	3.96249e-05		Niemann Pick C1 protein;Smp_188730	Putative uncharacterized protein [Source:UniProtKB/TrEMBL;Acc:G4M0K0]	_	_
Smp_138150	5.25823	5.51303	4.4049	5.36116	4.19772	3.15122	2.58392	3.17651	-0.647648	5e-05	0.0017469	6.62602	5.44726	4.33572	4.34812	3.05643	3.07852	2.2019	2.54484	-0.47696	2.42624e-06	0.000305149	4.03104	3.12906	2.74424	2.50501	1.80665	1.8153	1.30952	1.34203	-0.679901	1.22629e-05	0.000646812	GO:0005622,GO:0007165,GO:0008289	rho type gtpase activating protein;Smp_138150	Rho-type gtpase activating protein, putative [Source:UniProtKB/TrEMBL;Acc:G4LW97]	gi|256017148|ref|NP_872584.2|	rho GTPase-activating protein 7 isoform 1 [Homo sapiens]
Smp_073890	3.37588	3.8012	3.44758	2.79479	2.3777	2.24922	2.01457	1.93477	-0.645903	0.00315	0.0430866	3.66133	2.7242	2.51006	1.76483	1.6884	1.45528	1.27191	1.0908	-0.474918	0.00182307	0.0392616	2.36806	1.66293	1.67127	1.05462	1.05861	0.910658	0.781431	0.618121	-0.718804	0.00047293	0.00994352		Ankyrin repeat and fibronectin type III;note=predicted by EVM2;Smp_073890	Putative uncharacterized protein [Source:UniProtKB/TrEMBL;Acc:G4M052]	_	_
Smp_081430	8.49811	8.99151	9.11371	9.2341	9.54371	4.88148	4.25542	4.22471	-0.645785	0.0017	0.0277103	21.0746	16.7632	17.6825	13.3484	8.95558	7.64381	5.99826	10.2688	-0.579833	0.00212023	0.0425977	12.9637	9.76454	11.2303	7.46403	5.28683	4.47334	3.48978	5.32334	-0.791946	0.00070576	0.0132239	GO:0000166,GO:0008152,GO:0016491,GO:0055114	retinol dehydrogenase 11;Smp_081430	Short chain dehydrogenase,putative [Source:UniProtKB/TrEMBL;Acc:G4LV77]	gi|225579078|ref|NP_001139443.1|	retinol dehydrogenase 13 isoform 1 [Homo sapiens]
Smp_067000	65.288	79.8949	68.4968	61.0214	53.9305	42.0416	39.5656	40.3432	-0.643263	5e-05	0.0017469	124.508	90.3055	90.9069	64.3001	50.8944	53.348	45.3742	42.124	-0.468423	2.08904e-07	4.30719e-05	75.1752	51.3923	56.6552	35.7994	29.9586	31.2541	25.6911	21.2484	-0.691119	3.06784e-07	3.04283e-05		hypothetical protein;Smp_067000.2	Putative uncharacterized protein [Source:UniProtKB/TrEMBL;Acc:G4VIJ4]	_	_
SmVG_015669:Smp_118560	25.6245	30.5819	24.4833	20.7918	21.4792	14.4125	14.4739	14.6132	-0.643176	5e-05	0.0017469	43.5098	31.3119	26.2153	18.8889	14.3238	15.5365	12.4457	14.0467	-0.549	0.000158958	0.00812687	26.188	17.8252	16.2932	10.5461	8.44912	9.07856	7.13084	7.2499	-0.81142	1.15396e-05	0.000615783		hypothetical protein;Smp_118560	Putative uncharacterized protein [Source:UniProtKB/TrEMBL;Acc:G4VIL9]	_	_
SmVG_015669:Smp_156630	25.6245	30.5819	24.4833	20.7918	21.4792	14.4125	14.4739	14.6132	-0.643176	5e-05	0.0017469	43.5098	31.3119	26.2153	18.8889	14.3238	15.5365	12.4457	14.0467	-0.549	0.000158958	0.00812687	26.188	17.8252	16.2932	10.5461	8.44912	9.07856	7.13084	7.2499	-0.81142	1.15396e-05	0.000615783		hypothetical protein;Smp_156630	Putative uncharacterized protein [Source:UniProtKB/TrEMBL;Acc:G4VIL8]	gi|218505750|ref|NP_001136221.1|	estrogen-induced gene 121-like protein isoform 1 [Homo sapiens]
SmVG_015669:Smp_187900	25.6245	30.5819	24.4833	20.7918	21.4792	14.4125	14.4739	14.6132	-0.643176	5e-05	0.0017469	43.5098	31.3119	26.2153	18.8889	14.3238	15.5365	12.4457	14.0467	-0.549	0.000158958	0.00812687	26.188	17.8252	16.2932	10.5461	8.44912	9.07856	7.13084	7.2499	-0.81142	1.15396e-05	0.000615783		hypothetical protein;note=iprscan%3BPANTHER:PTHR22727%3B%3Bscore%3D9.2E-10%3Bquery 8-91%3Bdescription%3Dnull;Smp_187900	Putative uncharacterized protein [Source:UniProtKB/TrEMBL;Acc:G4VIL7]	gi|218505750|ref|NP_001136221.1|	estrogen-induced gene 121-like protein isoform 1 [Homo sapiens]
SmVG_022343:Smp_041630	39.9212	45.2525	27.9788	37.7211	22.8973	23.7047	22.0437	28.0723	-0.641483	5e-05	0.0017469	64.3636	50.1245	33.6564	36.0936	27.6151	33.0409	23.339	17.1775	-0.426389	8.93653e-05	0.00510885	39.2374	29.0279	21.2896	20.196	16.4233	19.3462	13.4816	8.86733	-0.643355	6.0597e-05	0.00225693		BCL2 apoptosis inhibitor%2Cdomain containing protein;Smp_041630	Putative uncharacterized protein [Source:UniProtKB/TrEMBL;Acc:G4VMZ7]	_	_
SmVG_022343:Smp_168470	39.9212	45.2525	27.9788	37.7211	22.8973	23.7047	22.0437	28.0723	-0.641483	5e-05	0.0017469	64.3636	50.1245	33.6564	36.0936	27.6151	33.0409	23.339	17.1775	-0.426389	8.93653e-05	0.00510885	39.2374	29.0279	21.2896	20.196	16.4233	19.3462	13.4816	8.86733	-0.643355	6.0597e-05	0.00225693		BCL2 apoptosis inhibitor%2Cdomain containing protein;Smp_168470.2	Putative uncharacterized protein [Source:UniProtKB/TrEMBL;Acc:G4VMZ8]	_	_
SmVG_022343:Smp_168470.2	39.9212	45.2525	27.9788	37.7211	22.8973	23.7047	22.0437	28.0723	-0.641483	5e-05	0.0017469	64.3636	50.1245	33.6564	36.0936	27.6151	33.0409	23.339	17.1775	-0.426389	8.93653e-05	0.00510885	39.2374	29.0279	21.2896	20.196	16.4233	19.3462	13.4816	8.86733	-0.643355	6.0597e-05	0.00225693		BCL2 apoptosis inhibitor%2Cdomain containing protein;Smp_168470.2
Smp_127940	21.6387	28.3404	20.2627	22.1557	18.0642	14.2075	12.7927	14.5023	-0.633348	5e-05	0.0017469	33.0134	21.5239	18.711	17.0257	12.4659	13.2689	10.01	10.2838	-0.483692	1.2671e-05	0.00121651	19.7437	12.2461	11.615	9.43553	7.24895	7.71521	5.64352	5.2654	-0.722907	4.33653e-06	0.000295305	GO:0005215,GO:0005452,GO:0005887,GO:0006810,GO:0006811,GO:0006820,GO:0008509,GO:0015698,GO:0015701,GO:0016020,GO:0016021,GO:0051453,GO:0098656	sodium driven chloride bicarbonate exchanger;Smp_127940	Putative sodium bicarbonate cotransporter (Nbc2, 3) [Source:UniProtKB/TrEMBL;Acc:G4VMR3]	gi|295821221|ref|NP_001171486.1|	sodium-driven chloride bicarbonate exchanger isoform 1 [Homo sapiens]
Smp_144430	15.716	17.7848	12.7047	13.5999	10.8214	9.42906	8.47797	9.87209	-0.631655	5e-05	0.0017469	28.5306	20.2369	17.3337	14.5966	12.0924	12.855	8.76705	9.08965	-0.452218	1.31548e-05	0.00124397	16.6619	10.9907	10.3079	7.79294	6.80506	7.07967	4.92906	4.45713	-0.670639	2.02722e-05	0.000968504	GO:0003779,GO:0005488,GO:0016043,GO:0017048,GO:0030036	formin protein CG32138 like;Smp_144430	Formin-like [Source:UniProtKB/TrEMBL;Acc:G4M1J2]	gi|33356148|ref|NP_005883.2|	formin-like protein 1 [Homo sapiens]
Smp_128810	30.6592	32.2899	25.5347	25.9151	19.3403	19.7792	17.0658	17.7552	-0.629637	5e-05	0.0017469	35.2832	28.982	22.3328	18.5675	16.6369	15.5579	12.6944	10.4398	-0.463636	2.58162e-07	5.07329e-05	21.3606	16.5184	13.8304	10.2813	9.66254	9.0108	7.14978	5.26524	-0.696918	1.20119e-06	0.000100558	GO:0005789,GO:0006506,GO:0016020,GO:0016021,GO:0016758	gpi mannosyltransferase 1;Smp_128810	Putative uncharacterized protein [Source:UniProtKB/TrEMBL;Acc:G4VC51]	gi|21553315|ref|NP_660150.1|	GPI mannosyltransferase 1 [Homo sapiens]
Smp_143690	9.38408	10.7093	9.63029	8.87217	8.56307	5.30521	5.38162	5.81657	-0.622687	0.0003	0.00788397	12.9093	9.15682	9.20091	6.3292	4.75048	5.56869	4.25379	4.97526	-0.462719	0.000612911	0.0190461	7.7777	5.39807	5.65347	3.47818	2.58555	3.00942	2.3357	2.43042	-0.748323	0.000116386	0.00371337	GO:0016020,GO:0016021,GO:0055085	feline leukemia virus subgroup C;Smp_143690	Feline leukemia virus subgroup C receptor-related [Source:UniProtKB/TrEMBL;Acc:G4VKF9]	gi|190341091|ref|NP_060261.2|	feline leukemia virus subgroup C receptor-related protein 2 isoform 1 [Homo sapiens]
SmVG_019084:Smp_213620	5.74508	6.96521	5.45011	4.78854	4.26736	3.29014	3.98667	3.40027	-0.618819	0.0007	0.0153523	9.04865	6.74493	6.29036	4.44182	3.69998	3.9494	3.71075	2.98615	-0.424647	0.000223811	0.00995857	5.46815	3.91122	3.93944	2.4509	2.13139	2.3182	2.10765	1.51877	-0.645341	0.000118963	0.00375619		hypothetical protein;Smp_213620
SmVG_019084:Smp_213630	5.74508	6.96521	5.45011	4.78854	4.26736	3.29014	3.98667	3.40027	-0.618819	0.0007	0.0153523	9.04865	6.74493	6.29036	4.44182	3.69998	3.9494	3.71075	2.98615	-0.424647	0.000223811	0.00995857	5.46815	3.91122	3.93944	2.4509	2.13139	2.3182	2.10765	1.51877	-0.645341	0.000118963	0.00375619		hypothetical protein;Smp_213630
Smp_122900	14.7675	18.3543	14.4487	10.4372	9.58419	10.1451	8.73905	9.35234	-0.617072	5e-05	0.0017469	27.7435	19.0748	16.5782	10.0972	11.0754	10.7886	8.45352	7.14892	-0.462849	0.00166305	0.0374015	16.9714	10.9993	10.3289	5.59878	6.43896	6.2637	4.76926	3.63252	-0.72575	0.000157748	0.00454085	GO:0007165	beta arrestin;Smp_122900	Putative beta-arrestin 1 [Source:UniProtKB/TrEMBL;Acc:G4VCF9]	gi|156071467|ref|NP_004303.2|	arrestin-C [Homo sapiens]
Smp_016600	5.27282	6.60135	5.88019	4.90905	4.03271	3.46355	3.70256	3.57912	-0.616919	0.0005	0.011737	12.7518	9.44652	9.13765	6.88268	4.35057	4.97874	4.08446	3.82545	-0.613801	4.99279e-10	1.65248e-07	7.91146	5.45715	5.708	3.89896	2.60953	2.86342	2.45486	1.90881	-0.892285	2.73673e-10	4.70335e-08	GO:0006810,GO:0006835,GO:0015293,GO:0016020,GO:0016021,GO:0017153,GO:0055085	solute carrier family 1;Smp_016600	Putative solute carrier family 1 (Glial high affinity glutamate transporter) [Source:UniProtKB/TrEMBL;Acc:G4VKW8]	gi|169790839|ref|NP_004163.3|	excitatory amino acid transporter 1 isoform 1 [Homo sapiens]
Smp_146950	3.34484	3.53103	3.6173	3.54925	2.77279	2.08126	1.79765	2.51359	-0.615538	0.00045	0.010904	4.54938	3.62014	3.76378	3.10318	2.04371	2.54655	1.58471	1.77577	-0.480646	4.36871e-05	0.003088	2.86356	2.15574	2.40201	1.7846	1.28853	1.53878	0.95062	0.986388	-0.660545	7.63948e-05	0.00267089	GO:0005515	basement membrane specific heparan sulfate;note=pfam_scan%3BPfam:PF00057.13%3B%3BE()%3D2.7E-6%3Bscore%3D27.0%3Bque ry 593-630%3Bdescription%3DLdl_recept_a;note=pfam_scan%3BPfam:PF13895.1%3B%3BE()%3D0.21%3Bscore%3D11.5%3Bquery 2030-2093%3Bdescription%3DIg_2;note=pfam_scan%3BPfam:PF13895.1%3B%3BE()%3D0.0054%3Bscore%3D16.6%3Bquer y 35-91%3Bdescription%3DIg_2;note=pfam_scan%3BPfam:PF13895.1%3B%3BE()%…	Putative uncharacterized protein [Source:UniProtKB/TrEMBL;Acc:G4VE01]	gi|126012571|ref|NP_005520.4|	basement membrane-specific heparan sulfate proteoglycan core protein precursor [Homo sapiens]
Smp_181010	15.8505	20.8811	17.2877	14.7855	13.925	12.3422	9.79122	8.87246	-0.614803	0.001	0.0196383	24.2007	15.4567	15.1684	10.0435	9.43451	7.79814	7.206	7.00361	-0.516079	0.000183278	0.00900423	16.4717	10.1938	11.402	6.63338	7.04906	5.56548	5.52886	4.36395	-0.660785	0.000331883	0.00796254	GO:0007229,GO:0016020,GO:0016021	integrin alpha ps;Smp_181010	Putative integrin alpha-ps [Source:UniProtKB/TrEMBL;Acc:G4VDY6]	_	_
Smp_017230	15.9824	19.3954	14.5015	13.3629	11.1948	9.3341	11.0324	9.81761	-0.611992	0.0004	0.00993278	20.9878	14.9303	12.2013	9.78033	7.60437	8.55557	7.85995	5.93522	-0.461291	4.67063e-05	0.00313961	12.2796	8.26261	7.46871	5.30043	4.29364	4.79156	4.31312	2.98868	-0.694485	7.78432e-05	0.00270083	GO:0004514,GO:0004516,GO:0005737,GO:0009435,GO:0016740,GO:0016757	nicotinamide phosphoribosyltransferase;Smp_017230	Nicotinate phosphoribosyltransferase related pre-B cell enhancing factor [Source:UniProtKB/TrEMBL;Acc:G4VE80]	gi|5031977|ref|NP_005737.1|	nicotinamide phosphoribosyltransferase precursor [Homo sapiens]
SmVG_024701:Smp_096420	7.74665	10.5688	8.33275	6.55064	4.37676	6.08922	5.67891	5.57745	-0.611951	0.0005	0.011737	16.0178	10.8444	11.8114	7.20318	8.41572	7.13661	6.49959	3.80304	-0.408406	0.00183622	0.0392631	9.64997	6.13956	7.32149	3.95931	4.85014	4.10279	3.63305	1.91243	-0.614142	0.00193988	0.0269839		hypothetical protein;Smp_096420	Putative uncharacterized protein [Source:UniProtKB/TrEMBL;Acc:G4VR54]	_	_
SmVG_024701:Smp_175060	7.74665	10.5688	8.33275	6.55064	4.37676	6.08922	5.67891	5.57745	-0.611951	0.0005	0.011737	16.0178	10.8444	11.8114	7.20318	8.41572	7.13661	6.49959	3.80304	-0.408406	0.00183622	0.0392631	9.64997	6.13956	7.32149	3.95931	4.85014	4.10279	3.63305	1.91243	-0.614142	0.00193988	0.0269839		hypothetical protein;Smp_175060	Putative uncharacterized protein [Source:UniProtKB/TrEMBL;Acc:G4VR53]	_	_
SmVG_024701:Smp_188230	7.74665	10.5688	8.33275	6.55064	4.37676	6.08922	5.67891	5.57745	-0.611951	0.0005	0.011737	16.0178	10.8444	11.8114	7.20318	8.41572	7.13661	6.49959	3.80304	-0.408406	0.00183622	0.0392631	9.64997	6.13956	7.32149	3.95931	4.85014	4.10279	3.63305	1.91243	-0.614142	0.00193988	0.0269839		hypothetical protein;Smp_188230	Putative uncharacterized protein [Source:UniProtKB/TrEMBL;Acc:G4VR55]	_	_
Smp_135010	65.1564	63.0766	58.2376	52.3869	54.2718	34.9111	27.7852	39.3847	-0.611345	5e-05	0.0017469	181.025	152.746	128.004	92.8994	68.6473	77.761	47.8942	67.3876	-0.570144	0.000145822	0.00754732	107.763	85.7723	78.2852	50.5757	39.5786	44.3938	26.728	33.5082	-0.815758	1.33321e-05	0.000683455	GO:0005215,GO:0016020,GO:0016021,GO:0034220	oxalate:formate antiporter;Smp_135010	Putative oxalate:formate antiporter [Source:UniProtKB/TrEMBL;Acc:G4VQE3]	_	_
SmVG_002865:Smp_122050	8.35877	9.1781	8.56824	8.13067	6.81042	5.39034	5.18838	5.02598	-0.611033	0.0002	0.0055642	9.66309	7.69044	7.1431	5.95589	4.40874	4.59831	3.75737	3.59288	-0.4478	3.90878e-05	0.00292624	5.84519	4.34964	4.4493	3.33075	2.60158	2.60297	2.13133	1.82272	-0.663363	4.83802e-06	0.000319905		lag1 longevity assurance 1;Smp_122050	(Dihydro)ceramide Synthase (LAG1) [Source:UniProtKB/TrEMBL;Acc:G4VAV7]	gi|11641421|ref|NP_067090.1|	LAG1 longevity assurance homolog 1 isoform 1 [Homo sapiens]
SmVG_002865:Smp_187170	8.35877	9.1781	8.56824	8.13067	6.81042	5.39034	5.18838	5.02598	-0.611033	0.0002	0.0055642	9.66309	7.69044	7.1431	5.95589	4.40874	4.59831	3.75737	3.59288	-0.4478	3.90878e-05	0.00292624	5.84519	4.34964	4.4493	3.33075	2.60158	2.60297	2.13133	1.82272	-0.663363	4.83802e-06	0.000319905		hypothetical protein;Smp_187170	Putative uncharacterized protein [Source:UniProtKB/TrEMBL;Acc:G4VAV8]	_	_
SmVG_002865:Smp_194790	8.35877	9.1781	8.56824	8.13067	6.81042	5.39034	5.18838	5.02598	-0.611033	0.0002	0.0055642	9.66309	7.69044	7.1431	5.95589	4.40874	4.59831	3.75737	3.59288	-0.4478	3.90878e-05	0.00292624	5.84519	4.34964	4.4493	3.33075	2.60158	2.60297	2.13133	1.82272	-0.663363	4.83802e-06	0.000319905		hypothetical protein;Smp_194790	Putative uncharacterized protein [Source:UniProtKB/TrEMBL;Acc:G4VAV9]	_	_
SmVG_012159:Smp_099800	20.3088	18.6736	13.0587	22.6889	14.3559	12.3275	9.75877	12.7143	-0.604309	5e-05	0.0017469	32.0249	30.3325	20.0988	27.203	18.3433	19.4462	13.3009	13.3391	-0.369455	0.000919755	0.0254237	19.3941	17.26	12.494	15.0743	10.621	11.2171	7.49307	6.77545	-0.560946	0.00041729	0.00926465		hypothetical protein;Smp_099800	Putative uncharacterized protein [Source:UniProtKB/TrEMBL;Acc:G4VGH2]	gi|21536371|ref|NP_009041.2|	telomerase protein component 1 [Homo sapiens]
SmVG_012159:Smp_099810	20.3088	18.6736	13.0587	22.6889	14.3559	12.3275	9.75877	12.7143	-0.604309	5e-05	0.0017469	32.0249	30.3325	20.0988	27.203	18.3433	19.4462	13.3009	13.3391	-0.369455	0.000919755	0.0254237	19.3941	17.26	12.494	15.0743	10.621	11.2171	7.49307	6.77545	-0.560946	0.00041729	0.00926465		telomerase protein component%3B telomerase associated protein;Smp_099810	Putative uncharacterized protein [Source:UniProtKB/TrEMBL;Acc:G4VGH3]	gi|21536371|ref|NP_009041.2|	telomerase protein component 1 [Homo sapiens]
SmVG_012159:Smp_176890	20.3088	18.6736	13.0587	22.6889	14.3559	12.3275	9.75877	12.7143	-0.604309	5e-05	0.0017469	32.0249	30.3325	20.0988	27.203	18.3433	19.4462	13.3009	13.3391	-0.369455	0.000919755	0.0254237	19.3941	17.26	12.494	15.0743	10.621	11.2171	7.49307	6.77545	-0.560946	0.00041729	0.00926465		hypothetical protein;Smp_176890
Smp_153480	29.2754	34.0184	23.4393	22.3932	18.9716	19.0048	15.9248	17.9696	-0.602522	0.0001	0.00315175	39.8957	28.8269	21.2088	17.7557	16.8051	16.4962	12.488	10.7623	-0.448614	0.000191381	0.00911741	24.1052	16.4046	13.1363	9.78169	9.80574	9.5623	7.03599	5.47131	-0.682433	7.51416e-05	0.00265763	GO:0005215,GO:0006810,GO:0006811,GO:0006821,GO:0015379,GO:0016020,GO:0016021,GO:0022820,GO:0055085,GO:0071805,GO:1902476	solute carrier family 12;Smp_153480	Putative cation chloride cotransporter [Source:UniProtKB/TrEMBL;Acc:G4VNM7]	gi|31881740|ref|NP_064631.2|	solute carrier family 12 member 9 [Homo sapiens]
Smp_072870	8.25927	8.90122	7.60224	6.66698	5.3964	5.38376	4.98508	5.03383	-0.595609	0.00265	0.0383421	13.9425	10.7142	9.78287	6.81122	5.94258	6.53265	5.42284	4.28358	-0.43198	0.00126148	0.0311703	8.94822	6.23016	6.31139	3.94575	3.4357	3.89323	3.18831	2.32548	-0.658511	0.000254351	0.00644709	GO:0005869	alpha centractin;note=predicted by EVM2;note=pfam_scan%3BPfam:PF00022.14%3B%3BE()%3D6.3E-131%3Bscore%3D436.2%3B query 9-373%3Bdescription%3DActin;note=iprscan%3BInterPro:IPR004000 : Actin/actin-like%3BPfam:PF00022%3B%3Bscore%3D2.6E-178%3Bquery 6-375%3Bdescription%3DActin/actin-like;note=iprscan%3BInterPro:IPR004000 : Actin/actin-like%3BSMART:SM00268%3B%3Bscore%3D7.0E-192%3Bquery 9-375%3Bdescripti…
Smp_167550	47.0437	48.103	44.8176	37.4994	32.5298	29.4711	24.0405	31.4435	-0.595049	5e-05	0.0017469	63.2277	53.0938	47.5454	35.0636	30.5232	32.9791	21.9137	22.3566	-0.440809	4.78293e-07	8.47252e-05	37.5376	29.4929	28.3941	18.599	17.2238	18.3981	11.814	10.8768	-0.640424	4.16619e-06	0.000285838	GO:0005515,GO:0005547,GO:0005768,GO:0006886,GO:0006897,GO:0007154,GO:0016023,GO:0016050,GO:0019898,GO:0035091,GO:0045335,GO:0090389	sorting nexin 33;Smp_167550	Sorting nexin, putative [Source:UniProtKB/TrEMBL;Acc:G4LXL2]	gi|23397574|ref|NP_695003.1|	sorting nexin-33 [Homo sapiens]
Smp_210760	4.53896	5.12906	4.59579	3.58034	2.93508	2.96677	2.73084	3.18305	-0.594741	0.0027	0.0389405	5.87015	4.23697	3.57421	2.79254	2.19509	2.32956	1.74312	1.4419	-0.575305	3.11867e-05	0.00243624	3.89981	2.74693	2.73479	1.77954	1.60312	1.79658	1.35232	0.927315	-0.680604	0.000138341	0.0041662	GO:0000413,GO:0003755,GO:0005515,GO:0016853	WD repeat containing protein 81;Smp_210760	Putative rotamase [Source:UniProtKB/TrEMBL;Acc:G4V8N5]	gi|313151183|ref|NP_001186211.1|	lipopolysaccharide-responsive and beige-like anchor protein [Homo sapiens]
Smp_166930	61.5424	80.8671	64.3821	46.9769	43.5768	41.1389	44.7057	39.0108	-0.591344	0.00025	0.00680816	88.5776	59.2873	58.3822	35.8183	36.6878	35.3002	34.5626	24.6363	-0.405933	0.00108119	0.028439	52.3812	33.047	35.5536	19.392	21.0135	20.0648	19.2284	12.1989	-0.630097	0.000188211	0.00525206	GO:0000166,GO:0005525,GO:0005622,GO:0006886,GO:0007264,GO:0015031	ADP ribosylation factor protein 8B like;Smp_166930	ADP-ribosylation factor-like 10, arl10 [Source:UniProtKB/TrEMBL;Acc:G4VC98]	gi|4502209|ref|NP_001653.1|	ADP-ribosylation factor 5 [Homo sapiens]
Smp_149080	17.5049	19.5491	13.2596	15.8649	13.6779	10.6858	8.582	11.0005	-0.590626	0.00015	0.00443311	23.8556	18.4995	12.5708	13.4085	9.99084	11.1372	6.96954	8.43185	-0.443781	0.0013009	0.0316676	14.709	10.8236	8.04967	7.64647	6.01014	6.63908	4.0132	4.43462	-0.662796	0.000358612	0.00839059		protein FAM160A1;note=predicted by EVM2;note=pfam_scan%3BPfam:PF10257.4%3B%3BE()%3D3.9E-47%3Bscore%3D160.7%3Bqu ery 2-259%3Bdescription%3DRAI16-like;note=iprscan%3BInterPro:IPR019384 : Retinoic acid induced 16-like protein%3BPfam:PF10257%3B%3Bscore%3D2.5E-12%3Bquery 1-259%3Bdescription%3DRetinoic acid induced 16-like protein;Smp_149080	Putative uncharacterized protein [Source:UniProtKB/TrEMBL;Acc:G4LWJ1]	_	_
Smp_143830	40.1798	45.2533	35.2905	36.8217	32.7315	24.8887	23.037	24.367	-0.585045	5e-05	0.0017469	68.2433	53.3977	41.1289	35.6022	27.7355	27.7685	22.2249	23.4088	-0.483425	1.06532e-05	0.00109824	41.4731	30.5569	25.7551	19.8227	16.3638	16.3234	12.815	11.9723	-0.707908	4.10509e-06	0.00028378	GO:0001676,GO:0003824,GO:0004467,GO:0006633,GO:0008152	long chain fatty acid transport protein 1;Smp_143830	Putative ffa transport protein [Source:UniProtKB/TrEMBL;Acc:G4VSJ8]	gi|38524616|ref|NP_940982.1|	long-chain fatty acid transport protein 1 [Homo sapiens]
Smp_095630	127.23	149.115	128.022	128.889	129.489	80.541	64.3956	82.987	-0.577236	5e-05	0.0017469	185.899	132.856	121.906	101.034	70.665	74.9303	50.8391	71.9502	-0.521293	0.000389408	0.0144631	110.643	74.8498	74.5567	55.2889	41.0279	42.8544	28.822	36.4747	-0.740248	5.66538e-05	0.00214509	GO:0005887,GO:0007166,GO:0016020,GO:0016021	Tetraspanin%2CIPR000301 CD9:CD37:CD63;Smp_095630	CD9-like protein Sm-TSP-1 [Source:UniProtKB/TrEMBL;Acc:Q86D97]	gi|283135199|ref|NP_570139.3|	tetraspanin-18 [Homo sapiens]
Smp_176940	13.5619	15.4291	12.2236	11.0906	12.0547	7.32606	7.24943	8.46572	-0.575652	0.0004	0.00993278	25.0637	18.8264	15.878	12.5916	8.95111	10.4642	7.86144	9.97	-0.472979	0.00129647	0.0316676	15.0574	10.7255	9.90594	6.9157	5.17304	6.00329	4.41643	5.00594	-0.684706	0.000372207	0.00857674	GO:0003333,GO:0005887,GO:0015171,GO:0015179,GO:0015297,GO:0015807,GO:0016020,GO:0016021,GO:1902475	cationic amino acid transporter;Smp_176940	Putative cationic amino acid transporter [Source:UniProtKB/TrEMBL;Acc:G4VAD5]	gi|258645169|ref|NP_003037.4|	low affinity cationic amino acid transporter 2 isoform 1 [Homo sapiens]
Smp_165700	5.96385	6.85889	6.27181	4.12533	3.71494	3.94832	4.16455	3.76391	-0.574581	0.00195	0.0306759	8.78549	6.22644	6.21137	3.51868	3.68618	3.78111	3.65735	2.45601	-0.399602	0.00231038	0.0444496	5.47343	3.74881	3.98557	2.23057	2.2755	2.37231	2.25379	1.42196	-0.577325	0.00175053	0.0252747	GO:0005097,GO:0005622,GO:0032313,GO:0032851	USP6 N terminal protein;Smp_165700.2	USP6 N-terminal-like protein [Source:UniProtKB/TrEMBL;Acc:G4VLZ7]	gi|310133501|ref|XP_003118533.1|	PREDICTED: TBC1 domain family member 3H-like [Homo sapiens]
Smp_196090	6.53208	6.88192	5.06291	4.78978	3.31383	3.71435	4.24714	4.34792	-0.574573	0.00315	0.0430866	8.57378	7.1422	5.14069	4.155	3.76612	4.36638	3.74582	2.09637	-0.41484	0.000631781	0.0194277	5.44677	4.25199	3.29297	2.40963	2.23312	2.58989	2.23333	1.09577	-0.634644	0.00100933	0.0173123	GO:0016020,GO:0016021,GO:0019887,GO:0030165,GO:0045859	kinase D interacting substrate of 220 kDa;Smp_196090	Putative tgf-beta receptor [Source:UniProtKB/TrEMBL;Acc:G4VFP5]	_	_
Smp_181050	32.5967	36.5079	23.886	32.8464	26.3956	21.8072	15.8223	20.4994	-0.574115	0.0001	0.00315175	45.8275	35.7087	24.8547	29.0045	21.5245	21.1097	14.0624	17.5231	-0.423997	0.00196382	0.0407633	27.3792	19.9372	15.0864	15.6202	12.2115	11.856	7.69406	8.61312	-0.623874	0.000466625	0.00985637	GO:0007018,GO:0016020,GO:0016021,GO:0019894	hypothetical protein;Smp_181050	Putative uncharacterized protein [Source:UniProtKB/TrEMBL;Acc:G4V5E4]	_	_
Smp_152130	20.6226	24.3491	18.1538	23.2101	20.5495	13.5103	11.3129	12.6277	-0.573893	5e-05	0.0017469	30.3308	22.2791	18.5109	19.8701	12.6901	13.1032	9.7978	13.165	-0.449521	0.00171533	0.0378323	18.1907	12.5582	11.3898	10.8439	7.31469	7.46801	5.4798	6.61959	-0.640471	0.000455616	0.00974622	GO:0005516,GO:0008017,GO:0016303,GO:0016740,GO:0036092	calmodulin regulated spectrin associated protein;Smp_152130	Similar to Serine-rich adhesin for platelets [Source:UniProtKB/TrEMBL;Acc:G4VB99]	gi|122937255|ref|NP_001073898.1|	calmodulin-regulated spectrin-associated protein 3 isoform 1 [Homo sapiens]
Smp_043670	44.4064	46.2537	40.5147	43.8851	37.6746	26.2247	25.1649	28.7662	-0.571137	5e-05	0.0017469	89.7169	72.5713	63.2682	56.7236	38.4025	45.1049	33.52	37.9073	-0.42631	3.02867e-05	0.00238072	53.1317	40.3245	38.1908	30.557	21.7897	25.5552	18.4304	18.606	-0.613499	2.91308e-05	0.00125386	GO:0000166,GO:0003824,GO:0003872,GO:0005524,GO:0005737,GO:0005945,GO:0006002,GO:0006096,GO:0008152,GO:0016301,GO:0016310,GO:0016740,GO:0046872,GO:0061615	6 phosphofructokinase;Smp_043670.2	6-phosphofructokinase [Source:UniProtKB/TrEMBL;Acc:G4VKA5]	gi|266453619|ref|NP_001160158.1|	6-phosphofructokinase, muscle type isoform 1 [Homo sapiens]
SmVG_020234:Smp_164120	9.91714	10.8214	6.95823	7.71852	6.48144	6.41601	5.28491	5.68933	-0.569073	5e-05	0.0017469	11.8407	9.18526	6.09645	5.77526	5.31135	5.0072	3.86758	3.45906	-0.431208	0.000358697	0.0137123	7.25999	5.34418	3.85742	3.25731	3.17405	2.96705	2.2395	1.79425	-0.665153	0.000183543	0.00516923		protein dopey 1;Smp_164120	Dopey-related [Source:UniProtKB/TrEMBL;Acc:G4VL71]	gi|45827701|ref|NP_005119.2|	protein dopey-2 [Homo sapiens]
SmVG_020234:Smp_164130	9.91714	10.8214	6.95823	7.71852	6.48144	6.41601	5.28491	5.68933	-0.569073	5e-05	0.0017469	11.8407	9.18526	6.09645	5.77526	5.31135	5.0072	3.86758	3.45906	-0.431208	0.000358697	0.0137123	7.25999	5.34418	3.85742	3.25731	3.17405	2.96705	2.2395	1.79425	-0.665153	0.000183543	0.00516923		protein dopey 1;Smp_164130	Dopey-related [Source:UniProtKB/TrEMBL;Acc:G4VL72]	_	_
Smp_036020	26.5845	30.3774	19.9949	21.2142	16.4472	18.9381	14.4747	16.6729	-0.561226	0.00015	0.00443311	32.2987	24.2854	17.0384	15.4844	15.6009	14.3709	10.6592	8.87064	-0.405829	0.000710406	0.0209737	20.3926	14.5497	11.0335	9.00971	9.53809	8.8382	6.3045	4.70486	-0.628132	0.000341652	0.00811869	GO:0005515,GO:0016020,GO:0016021	hypothetical protein;Smp_036020	Putative uncharacterized protein [Source:UniProtKB/TrEMBL;Acc:G4VHT4]	_	_
Smp_130300	11.0054	13.1367	9.61137	11.1136	9.43781	7.41617	6.31593	7.24813	-0.560729	5e-05	0.0017469	15.1288	11.0905	8.93609	8.73762	6.11747	6.09616	4.90017	5.5521	-0.477559	4.69307e-05	0.00313961	8.87895	6.15476	5.43722	4.74097	3.74824	3.76774	2.83568	2.73055	-0.629295	2.48074e-05	0.00114327	GO:0000166,GO:0005391,GO:0005524,GO:0005887,GO:0006754,GO:0006810,GO:0006811,GO:0006812,GO:0006813,GO:0006814,GO:0006883,GO:0010107,GO:0010248,GO:0015077,GO:0015672,GO:0015991,GO:0016020,GO:0016021,GO:0016787,GO:0016820,GO:0019829,GO:0030007,GO:0036376,GO:0043231,GO:0046872	Na+:K+ ATPase alpha subunit;Smp_130300	Putative na+/k+ atpase alpha subunit [Source:UniProtKB/TrEMBL;Acc:G4VGA0]	gi|4502285|ref|NP_001672.1|	sarcoplasmic/endoplasmic reticulum calcium ATPase 2 isoform a [Homo sapiens]
Smp_043170	23.5866	27.6132	23.2124	16.8105	14.9454	15.4273	16.3428	15.1395	-0.560504	0.00055	0.012615	39.5149	29.6937	28.5865	16.9547	17.8989	17.5418	16.6265	10.8071	-0.409744	0.00046113	0.0160655	23.9707	17.0346	17.8263	9.38254	10.4319	10.1276	9.33767	5.47773	-0.63374	0.000219219	0.00583199	GO:0000226,GO:0005737,GO:0008283,GO:0015630,GO:0021987	transforming acidic coiled coil containing;Smp_043170	Putative transforming acidic coiled-coil containing protein 1/2 [Source:UniProtKB/TrEMBL;Acc:G4VIX4]	gi|5454102|ref|NP_006333.1|	transforming acidic coiled-coil-containing protein 3 [Homo sapiens]
SmVG_029164:Smp_169420	11.0169	12.8734	8.90042	9.2958	8.17987	7.19498	5.84111	7.35989	-0.558562	0.00085	0.0173346	13.5193	9.8611	7.29915	6.91322	5.3657	6.04177	3.41828	4.35297	-0.495253	0.000782683	0.0224744	9.03339	6.31949	5.01304	4.15139	3.94509	3.96176	2.63979	2.46858	-0.618985	0.000492973	0.0102703		hypothetical protein;note=tmhmm%3B%3Bquery 1-109%3B;note=%3Bquery 1-74%3B;note=%3Bquery 75-94%3B;note=%3Bquery 95-109%3B;Smp_169420	Putative uncharacterized protein [Source:UniProtKB/TrEMBL;Acc:G4LXU2]	_	_
SmVG_029164:Smp_169430	11.0169	12.8734	8.90042	9.2958	8.17987	7.19498	5.84111	7.35989	-0.558562	0.00085	0.0173346	13.5193	9.8611	7.29915	6.91322	5.3657	6.04177	3.41828	4.35297	-0.495253	0.000782683	0.0224744	9.03339	6.31949	5.01304	4.15139	3.94509	3.96176	2.63979	2.46858	-0.618985	0.000492973	0.0102703		partitioning defective 3;Smp_169430	Cell polarity protein [Source:UniProtKB/TrEMBL;Acc:G4LXU3]	gi|21361831|ref|NP_062565.2|	partitioning defective 3 homolog isoform 1 [Homo sapiens]
SmVG_018935:Smp_143980	25.9901	27.9399	20.6313	19.7183	19.6411	15.1753	13.5957	15.791	-0.554301	0.0002	0.0055642	33.6676	26.6935	19.4738	15.8253	14.2972	14.7768	10.8226	11.3091	-0.429617	0.000496762	0.0166164	20.3678	15.1714	12.0268	8.66263	8.24465	8.48381	6.04303	5.65494	-0.652758	9.7832e-05	0.00324624		hypothetical protein;Smp_143980	Putative uncharacterized protein [Source:UniProtKB/TrEMBL;Acc:G4VKH9]	_	_
SmVG_018935:Smp_143990	25.9901	27.9399	20.6313	19.7183	19.6411	15.1753	13.5957	15.791	-0.554301	0.0002	0.0055642	33.6676	26.6935	19.4738	15.8253	14.2972	14.7768	10.8226	11.3091	-0.429617	0.000496762	0.0166164	20.3678	15.1714	12.0268	8.66263	8.24465	8.48381	6.04303	5.65494	-0.652758	9.7832e-05	0.00324624		hypothetical protein;Smp_143990	Putative uncharacterized protein [Source:UniProtKB/TrEMBL;Acc:G4VKI0]	_	_
Smp_135280	23.344	24.673	16.4214	19.5539	15.4834	15.1887	12.1039	14.4374	-0.553904	0.0002	0.0055642	27.3981	22.8897	14.7764	14.8838	13.1745	13.2118	9.27486	8.72013	-0.407509	0.000361438	0.0137752	16.316	12.8771	9.01678	8.1207	7.56139	7.54472	5.14344	4.33209	-0.621292	0.000145934	0.00428182	GO:0005086,GO:0005488,GO:0005802,GO:0016192,GO:0032012,GO:0043547	brefeldin A inhibited guanine;Smp_135280	Putative brefeldin A-inhibited guanine nucleotide-exchange protein [Source:UniProtKB/TrEMBL;Acc:G4VQ77]	gi|150417986|ref|NP_006411.2|	brefeldin A-inhibited guanine nucleotide-exchange protein 2 [Homo sapiens]
Smp_055870	180.45	209.44	186.898	159.405	141.146	126.448	118.966	115.439	-0.552399	5e-05	0.0017469	309.834	238.247	236.731	163.78	139.667	139.823	128.19	110.995	-0.414479	1.28797e-06	0.000188359	199.406	145.607	157.364	98.436	89.0484	87.5971	79.3748	63.0662	-0.615956	5.25612e-06	0.000337761	GO:0000149,GO:0005484,GO:0006887,GO:0006906,GO:0016020,GO:0016021,GO:0016192,GO:0031201	vesicleassociated membrane protein;Smp_055870	IMP25 protein; Synaptobrevin, putative [Source:UniProtKB/TrEMBL;Acc:Q26586]	gi|5032137|ref|NP_005629.1|	vesicle-associated membrane protein 7 isoform 1 [Homo sapiens]
Smp_081190	26.4933	30.6241	29.6252	20.8802	21.139	18.2151	15.1118	19.1622	-0.547653	0.00225	0.0340294	38.3145	28.3825	29.6819	17.9173	17.34	18.6321	13.219	13.6514	-0.397251	0.00171337	0.0378323	22.9323	15.9269	18.516	9.95434	10.1438	10.8304	7.46657	6.89693	-0.606691	0.00143963	0.0221528	GO:0000166,GO:0005525,GO:0005622,GO:0007264,GO:0016020	GTP binding protein rhoA;Smp_081190	Putative rho3 GTPase; Rho3 GTPase [Source:UniProtKB/TrEMBL;Acc:Q8I8A0]	gi|111494248|ref|NP_001036143.1|	rho-related GTP-binding protein RhoC precursor [Homo sapiens]
Smp_095620	43.3561	52.6386	34.1894	34.229	31.5225	28.0572	25.8624	27.1658	-0.546017	0.0002	0.0055642	70.0628	50.7065	36.8082	31.9816	28.5452	29.2581	23.7712	21.6174	-0.405041	0.000750055	0.0217627	42.5146	29.0542	22.9652	17.8378	16.8624	16.9945	13.4589	11.0869	-0.624003	0.000182617	0.00515907	GO:0005856,GO:0016020,GO:0016021	hypothetical protein;Smp_095620	4.1 G protein, putative [Source:UniProtKB/TrEMBL;Acc:G4M101]	gi|117500790|ref|NP_777598.3|	FERM domain-containing protein 3 [Homo sapiens]
Smp_172250	7.39492	7.44221	6.67068	6.61767	6.38384	3.66341	4.60039	4.6282	-0.545084	0.00335	0.04467	8.2131	6.92501	5.86307	4.91271	3.12811	4.15897	3.45102	3.60174	-0.413284	0.00155939	0.0357892	5.00354	4.05791	3.69009	2.7813	1.90349	2.47223	1.98479	1.86502	-0.583942	0.00249584	0.0317194		inositol 5 phosphatase;note=predicted by EVM2;Smp_172250	Putative inositol 5-phosphatase [Source:UniProtKB/TrEMBL;Acc:G4VLN0]	_	_
Smp_131250	52.0539	59.62	49.7992	49.2165	46.7757	34.9301	31.9556	30.7928	-0.544506	0.00035	0.00891215	62.572	52.415	48.7447	40.7933	26.4515	29.119	24.9579	31.2916	-0.430489	0.00171713	0.0378323	45.4893	32.6518	32.6705	23.7743	18.5447	18.368	15.7708	16.1308	-0.613628	9.89032e-05	0.0032699	GO:0016020,GO:0016021	hypothetical protein;Smp_131250	NDRG4 protein (S33 family) [Source:UniProtKB/TrEMBL;Acc:G4VKX1]	_	_
Smp_164760	24.3668	25.7148	22.4634	19.1159	15.8457	15.2443	16.4398	15.7307	-0.535	0.0005	0.011737	31.981	26.6203	23.4588	16.1823	15.0075	16.1777	14.5838	10.1087	-0.385087	2.07012e-05	0.00174738	18.7299	14.6759	14.2462	8.69307	8.51491	9.13372	8.02475	4.93727	-0.581825	2.63107e-05	0.00118854	GO:0005515	cell adhesion molecule;Smp_164760	Putative uncharacterized protein [Source:UniProtKB/TrEMBL;Acc:C4QII1]	_	_
Smp_133420	6.7317	7.80935	4.84204	5.83089	4.44431	4.42764	4.15155	4.4255	-0.53108	0.00215	0.0330718	9.25642	6.84681	4.94961	4.63281	4.00058	4.28456	3.36981	2.59217	-0.404306	0.00047198	0.0161746	5.70892	3.98573	3.07049	2.65047	2.42029	2.52801	1.91084	1.34181	-0.631129	0.000624315	0.0120187	GO:0000166,GO:0004672,GO:0004674,GO:0005524,GO:0005634,GO:0005737,GO:0006468,GO:0008360,GO:0016301,GO:0016310,GO:0016772,GO:0018105	serine:threonine protein kinase;Smp_133420	Serine/threonine kinase [Source:UniProtKB/TrEMBL;Acc:G4LYB2]	gi|98986450|ref|NP_071331.2|	casein kinase I isoform gamma-1 [Homo sapiens]
Smp_163780	60.0738	63.4111	50.5504	57.4779	49.3878	39.5176	34.8705	36.9359	-0.526619	0.00015	0.00443311	75.467	61.59	48.7986	46.3355	36.6956	35.8704	28.6111	29.89	-0.393751	1.05977e-05	0.00109824	44.978	34.6513	29.8039	25.0848	20.9591	20.403	15.8828	14.8952	-0.583044	2.51897e-05	0.00115506	GO:0005515	WD repeat containing protein 26;Smp_163780	Putative wd-repeat protein [Source:UniProtKB/TrEMBL;Acc:G4VTN3]	gi|264681558|ref|NP_079436.4|	WD repeat-containing protein 26 isoform a [Homo sapiens]
Smp_147470	19.6138	23.3882	17.8471	16.7523	12.4915	12.9929	15.2371	13.1619	-0.526242	0.0008	0.0165775	27.3902	19.1409	15.8985	13.07	11.2253	11.576	11.4469	6.96355	-0.42305	5.48238e-05	0.00351795	17.1908	11.3912	10.3258	7.60932	6.97864	7.08414	7.02144	3.82873	-0.618945	0.000197906	0.00540687	GO:0016020,GO:0016021	SLIT and NTRK protein 5 like;Smp_147470	Putative leucine-rich transmembrane proteins [Source:UniProtKB/TrEMBL;Acc:G4VNB5]	_	_
Smp_150730	5.59552	6.01905	3.77374	6.05822	3.73821	3.93312	3.15203	4.09961	-0.523209	0.00325	0.0439872	6.36767	5.17352	3.3177	4.37633	3.19959	3.49525	2.39619	1.95465	-0.389282	0.00124491	0.0309433	3.89674	2.98419	2.08043	2.47243	1.88395	2.06755	1.3736	1.01749	-0.587546	0.00235931	0.0304592	GO:0004714,GO:0007155,GO:0016020,GO:0016021,GO:0016740,GO:0018108,GO:0070492	discoidin domain containing receptor 2;Smp_150730	Putative discoidin domain receptor [Source:UniProtKB/TrEMBL;Acc:G4V7C2]	gi|62420884|ref|NP_006173.2|	discoidin domain-containing receptor 2 precursor [Homo sapiens]
SmVG_011546:Smp_018670	11.0558	11.7205	12.4006	9.72568	8.81582	7.53513	7.72714	7.40533	-0.512207	0.0011	0.0208745	14.3495	11.3038	12.4111	8.19151	6.91016	7.39032	6.29565	5.63522	-0.388894	2.82232e-05	0.00229009	8.60794	6.41217	7.62887	4.48369	3.98384	4.22884	3.50129	2.82428	-0.581931	1.51132e-05	0.000749498		tyrosine protein phosphatase non receptor type;Smp_018670	Putative 4.1 G protein [Source:UniProtKB/TrEMBL;Acc:G4VGL3]	gi|4506295|ref|NP_002821.1|	tyrosine-protein phosphatase non-receptor type 4 [Homo sapiens]
SmVG_011546:Smp_132370	11.0558	11.7205	12.4006	9.72568	8.81582	7.53513	7.72714	7.40533	-0.512207	0.0011	0.0208745	14.3495	11.3038	12.4111	8.19151	6.91016	7.39032	6.29565	5.63522	-0.388894	2.82232e-05	0.00229009	8.60794	6.41217	7.62887	4.48369	3.98384	4.22884	3.50129	2.82428	-0.581931	1.51132e-05	0.000749498		tyrosine protein phosphatase non receptor type%3B protein tyrosine phosphatase non receptor type;Smp_132370	Putative uncharacterized protein [Source:UniProtKB/TrEMBL;Acc:G4VGL4]	gi|223941882|ref|NP_001138841.1|	tyrosine-protein phosphatase non-receptor type 3 isoform 3 [Homo sapiens]
SmVG_011546:Smp_132390	11.0558	11.7205	12.4006	9.72568	8.81582	7.53513	7.72714	7.40533	-0.512207	0.0011	0.0208745	14.3495	11.3038	12.4111	8.19151	6.91016	7.39032	6.29565	5.63522	-0.388894	2.82232e-05	0.00229009	8.60794	6.41217	7.62887	4.48369	3.98384	4.22884	3.50129	2.82428	-0.581931	1.51132e-05	0.000749498		hypothetical protein;Smp_132390	Putative uncharacterized protein [Source:UniProtKB/TrEMBL;Acc:G4VGL5]	_	_
SmVG_025144:Smp_118100	9.86511	7.71821	6.32512	7.54032	5.37477	6.17814	4.36065	6.13788	-0.512131	0.00295	0.0409727	9.41158	10.0034	5.95193	6.13439	5.70759	5.87184	3.71768	3.06569	-0.384334	0.00132437	0.0319705	5.73586	5.85203	3.72873	3.41966	3.39207	3.46488	2.1469	1.56882	-0.569769	0.00422469	0.0441079		tyrosine protein kinase transmembrane receptor;Smp_118100
SmVG_025144:Smp_157650	9.86511	7.71821	6.32512	7.54032	5.37477	6.17814	4.36065	6.13788	-0.512131	0.00295	0.0409727	9.41158	10.0034	5.95193	6.13439	5.70759	5.87184	3.71768	3.06569	-0.384334	0.00132437	0.0319705	5.73586	5.85203	3.72873	3.41966	3.39207	3.46488	2.1469	1.56882	-0.569769	0.00422469	0.0441079		tyrosine protein kinase transmembrane receptor;Smp_157650	Putative uncharacterized protein [Source:UniProtKB/TrEMBL;Acc:G4VPB9]	_	_
Smp_159890	8.03477	8.64453	6.46242	7.31713	5.88551	5.66778	4.86174	4.96557	-0.51056	0.00145	0.0248013	11.1493	8.98075	6.95623	6.67518	5.4324	5.61203	4.34079	3.78804	-0.393531	9.23236e-05	0.00520697	7.29951	5.5045	4.68646	4.01392	3.31668	3.41374	2.66502	2.0988	-0.595459	1.65149e-05	0.000805874	GO:0004180,GO:0004181,GO:0004185,GO:0005615,GO:0005886,GO:0006508,GO:0006518,GO:0008270,GO:0009986,GO:0016020,GO:0016021,GO:0016485,GO:0016787	carboxypeptidase d;Smp_159890	Metallocarboxypeptidase D peptidase unit 2 (M14 family) [Source:UniProtKB/TrEMBL;Acc:G4M1C3]	gi|22202611|ref|NP_001295.2|	carboxypeptidase D isoform 1 precursor [Homo sapiens]
SmVG_000056:Smp_089700	39.1221	44.0636	40.5283	33.4784	29.5776	25.5037	29.4828	25.905	-0.508889	0.0003	0.00788397	53.0131	41.3978	41.0542	28.6715	24.2531	25.7962	24.9289	18.6907	-0.381662	4.33889e-06	0.000514814	31.1968	22.9344	24.8228	15.425	13.7058	14.6352	13.6921	9.16295	-0.564381	6.39552e-06	0.000386484		integrin beta 2;Smp_089700	Integrin beta [Source:UniProtKB/TrEMBL;Acc:G4V5U8]	gi|19743823|ref|NP_596867.1|	integrin beta-1 isoform 1A precursor [Homo sapiens]
SmVG_000056:Smp_171080	39.1221	44.0636	40.5283	33.4784	29.5776	25.5037	29.4828	25.905	-0.508889	0.0003	0.00788397	53.0131	41.3978	41.0542	28.6715	24.2531	25.7962	24.9289	18.6907	-0.381662	4.33889e-06	0.000514814	31.1968	22.9344	24.8228	15.425	13.7058	14.6352	13.6921	9.16295	-0.564381	6.39552e-06	0.000386484		hypothetical protein;Smp_171080	Putative uncharacterized protein [Source:UniProtKB/TrEMBL;Acc:G4V5U9]	_	_
Smp_212360	47.0434	49.9175	39.6019	44.9838	42.7517	29.7576	24.1932	30.9181	-0.50848	0.0003	0.00788397	58.0292	47.8366	37.2441	36.3671	27.3194	28.9941	19.7526	25.3923	-0.396647	0.00130427	0.0316676	35.1417	27.328	23.3378	20.2777	16.0078	16.97	11.2913	13.0605	-0.56783	0.000553696	0.0111182	GO:0016020,GO:0016021	GRAM domain containing protein 1A;Smp_212360	Putative uncharacterized protein [Source:UniProtKB/TrEMBL;Acc:G4VBY5]	gi|187936935|ref|NP_060047.3|	GRAM domain-containing protein 1C isoform 1 [Homo sapiens]
Smp_036990	33.9367	43.9539	34.2752	28.1165	24.6171	26.912	24.055	23.2589	-0.505122	0.00125	0.0226255	72.3491	50.9658	45.7696	31.9701	31.3106	28.9687	23.4201	23.1198	-0.431941	0.000267987	0.0112349	43.3994	28.3316	26.2553	17.3292	19.1024	16.7497	13.4932	11.9282	-0.587253	0.000637505	0.0122211	GO:0005515,GO:0005737,GO:0006897	sh domain grb%3B endophilin;Smp_036990	Sh3-containing grb2-like protein 3 (Endophilin III) [Source:UniProtKB/TrEMBL;Acc:G4LV14]	gi|9910352|ref|NP_064530.1|	endophilin-B2 [Homo sapiens]
SmVG_024473:Smp_017710	15.3771	16.2587	14.1476	13.8247	10.7681	10.358	10.3852	10.5283	-0.503761	0.001	0.0196383	21.7103	17.9525	16.192	13.2179	10.5398	11.3694	9.8233	7.8059	-0.387984	1.07565e-05	0.00109988	13.0082	10.2245	10.1099	7.37403	6.16324	6.66273	5.61781	4.00894	-0.575644	4.76773e-07	4.48511e-05		rab11 family interacting protein 3;note=predicted by EVM2;note=pfam_scan%3BPfam:PF13499.1%3B%3BE()%3D6.5E-8%3Bscore%3D32.4%3Bquer y 11-78%3Bdescription%3DEF_hand_5;Smp_017710	Putative rab [Source:UniProtKB/TrEMBL;Acc:G4VP59]	_	_
SmVG_024473:Smp_131900	15.3771	16.2587	14.1476	13.8247	10.7681	10.358	10.3852	10.5283	-0.503761	0.001	0.0196383	21.7103	17.9525	16.192	13.2179	10.5398	11.3694	9.8233	7.8059	-0.387984	1.07565e-05	0.00109988	13.0082	10.2245	10.1099	7.37403	6.16324	6.66273	5.61781	4.00894	-0.575644	4.76773e-07	4.48511e-05		Rab11 family interacting protein 4;note=pfam_scan%3BPfam:PF09457.5%3B%3BE()%3D1.1E-9%3Bscore%3D37.8%3Bquer y 118-157%3Bdescription%3DRBD-FIP;note=iprscan%3BInterPro:IPR019018 : Rab11-binding domain %2C FIP domain%2C C-terminal%3BPfam:PF09457%3B%3Bscore%3D8.3E-9%3Bquery 118-158%3Bdescription%3DRab11-binding domain %2C FIP domain%2C C-terminal;Smp_131900	Putative rab-interacting protein [Source:UniProtKB/TrEMBL;Acc:G4VP58]	_	_
Smp_212570	21.5578	24.1778	17.7434	21.9852	17.1071	15.748	12.0923	15.3584	-0.503026	0.0012	0.0219854	30.4786	23.2396	18.1274	17.6084	14.5816	15.3424	10.3307	10.5205	-0.392548	4.31263e-05	0.00308181	18.3767	13.1246	11.2164	9.6975	8.54569	8.84648	5.88225	5.32395	-0.584405	0.000134678	0.00410156	GO:0003824,GO:0008152	disco interacting protein 2 (dip2);Smp_212570	Disco-interacting protein 2 (Dip2), putative [Source:UniProtKB/TrEMBL;Acc:G4LY16]	gi|225735625|ref|NP_001139586.1|	disco-interacting protein 2 homolog A isoform e [Homo sapiens]
Smp_133600	35.0745	34.3265	30.6281	28.4866	24.9944	21.5437	22.7074	21.6182	-0.500168	0.00195	0.0306759	39.4931	33.7595	28.4974	21.809	19.3931	19.6754	18.2439	14.3079	-0.358382	0.00085477	0.0238899	24.2758	19.5753	17.9463	12.1234	11.5356	11.6893	10.6794	7.26638	-0.524209	0.000329235	0.00796254	GO:0003983,GO:0006011,GO:0008152,GO:0016740,GO:0016779,GO:0070569	hypothetical protein;Smp_133600	Putative utp-glucose-1-phosphate uridylyltransferase 2 (Udp-glucose pyrophosphorylase 2) [Source:UniProtKB/TrEMBL;Acc:G4VDL3]	gi|48255966|ref|NP_006750.3|	UTP--glucose-1-phosphate uridylyltransferase isoform a [Homo sapiens]
Smp_169180	9.0801	9.88543	7.00808	9.73053	6.86919	6.34285	5.38175	6.66196	-0.49948	0.00045	0.010904	12.8349	10.3618	7.499	8.49436	6.45701	7.07538	4.69507	4.72039	-0.368809	0.000201259	0.00944489	7.67753	5.86124	4.60552	4.69152	3.75439	4.08291	2.6616	2.35578	-0.552323	0.000228232	0.00601913	GO:0004553,GO:0005576,GO:0005975,GO:0030248,GO:0004842,GO:0005488,GO:0005515,GO:0005622,GO:0005634,GO:0005737,GO:0006464,GO:0016567,GO:0016874,GO:0042787	E3 ubiquitin protein ligase HECTD1;Smp_169180	Putative uncharacterized protein [Source:UniProtKB/TrEMBL;Acc:G4VA25]	_	_
Smp_148100	32.6975	34.6225	33.6894	24.0638	21.5986	21.6613	19.7707	25.456	-0.499242	0.00255	0.0373751	57.5287	44.4936	41.8712	25.7238	25.4003	27.8721	19.9942	18.0657	-0.422908	0.000131507	0.00692035	36.5001	27.1058	26.7501	15.2856	15.9875	17.5458	11.8196	10.5259	-0.601183	0.000348514	0.00821754	GO:0016020,GO:0016021,GO:0016853	hypothetical protein;Smp_148100	Putative prokaryotic DNA topoisomerase [Source:UniProtKB/TrEMBL;Acc:G4V8J6]	_	_
SmVG_032331:Smp_093160	15.026	17.5838	13.5513	12.8943	12.9076	10.604	8.80283	9.48047	-0.498743	0.0008	0.0165775	25.2842	19.9777	15.9082	13.5554	11.4219	11.1841	8.42394	10.2108	-0.410176	0.000980051	0.0266913	15.4097	11.5436	10.0527	7.60831	6.74248	6.55852	4.85772	5.29667	-0.596215	0.00034572	0.00817631		STARP antigen;Smp_093160
SmVG_032331:Smp_212420	15.026	17.5838	13.5513	12.8943	12.9076	10.604	8.80283	9.48047	-0.498743	0.0008	0.0165775	25.2842	19.9777	15.9082	13.5554	11.4219	11.1841	8.42394	10.2108	-0.410176	0.000980051	0.0266913	15.4097	11.5436	10.0527	7.60831	6.74248	6.55852	4.85772	5.29667	-0.596215	0.00034572	0.00817631		SH3 domain containing kinase binding protein 1;note=pfam_scan%3BPfam:PF00018.23%3B%3BE()%3D3.2E-12%3Bscore%3D45.5%3Bqu ery 5-48%3Bdescription%3DSH3_1;note=pfam_scan%3BPfam:PF00018.23%3B%3BE()%3D1.0E-11%3Bscore%3D43.8%3Bqu ery 158-206%3Bdescription%3DSH3_1;note=iprscan%3BInterPro:IPR001452 : Src homology-3%3BPfam:PF00018%3B%3Bscore%3D3.5E-17%3Bquery 1-55%3Bdescription%3DSrc homology-3 domain;note=…
Smp_045480	50.9214	59.6793	41.9333	50.095	38.2324	38.2309	32.4364	34.928	-0.494498	0.00075	0.0158697	84.0447	62.9536	48.1004	46.1866	40.0688	38.8744	29.1646	26.3134	-0.405995	8.68202e-06	0.000949511	50.0938	35.3772	29.2738	24.9261	22.9198	21.9601	16.1013	13.0022	-0.611057	2.60238e-05	0.00118143	GO:0005515	protein numb;Smp_045480.2	Cell polarity protein [Source:UniProtKB/TrEMBL;Acc:G4LXP6]	gi|20070356|ref|NP_003735.3|	protein numb homolog isoform 3 [Homo sapiens]
Smp_133690	24.9457	30.5629	21.1589	23.7149	20.6904	18.1286	14.5772	17.8741	-0.494132	0.00085	0.0173346	35.0356	23.6451	18.9723	17.8534	15.6778	15.9524	10.8809	11.3988	-0.386569	0.00100036	0.0270571	21.9376	14.2857	12.5353	10.3981	9.59548	9.74643	6.45227	6.25358	-0.591149	0.000407644	0.00911841	GO:0004714,GO:0007155,GO:0016020,GO:0016021,GO:0016740,GO:0018108	discoidin domain containing receptor 2;Smp_133690	Putative discoidin domain receptor [Source:UniProtKB/TrEMBL;Acc:G4VDF2]	_	_
Smp_079010	52.9313	68.1874	51.0443	45.7098	38.4529	44.3106	37.9357	34.1309	-0.492799	0.00105	0.0201806	71.0852	47.6099	43.4307	32.4897	35.9999	29.109	27.3225	20.2699	-0.360802	0.00102566	0.027388	43.6238	27.656	27.5539	18.5818	21.5832	17.441	15.9527	10.6739	-0.551032	0.000583242	0.0115446	GO:0000166,GO:0001932,GO:0005952,GO:0007165,GO:0008603,GO:0016301,GO:0016310,GO:0030552,GO:0045859	cAMP dependent protein kinase type II regulatory;Smp_079010	Camp-dependent protein kinase type II-alpha regulatory subunit, putative [Source:UniProtKB/TrEMBL;Acc:G4LV34]	gi|47132585|ref|NP_002727.2|	cAMP-dependent protein kinase type II-beta regulatory subunit [Homo sapiens]
Smp_032520	177.544	174.718	213.998	181.414	189.43	114.74	102.904	125.342	-0.48986	0.00115	0.0213294	322.853	270.623	302.705	214.84	150.854	174.266	126.092	163.478	-0.42054	0.00139438	0.0332772	192.514	151.604	183.799	115.531	85.6106	98.0628	69.3796	80.6484	-0.592849	0.000615683	0.0119231	GO:0016020,GO:0016021	lysosome associated membrane glycoprotein;Smp_032520	Putative lysosome-associated membrane glycoprotein [Source:UniProtKB/TrEMBL;Acc:G4VSF3]	_	_
Smp_146430	26.3696	29.81	29.1481	23.9756	22.2683	18.555	16.9274	20.0904	-0.489734	0.00095	0.0189874	38.4598	27.7814	26.9276	20.4128	16.5707	18.5701	12.9914	13.2111	-0.437611	1.85058e-06	0.000250266	26.8383	18.2084	18.6788	12.751	10.9998	11.7699	8.10538	7.55041	-0.675359	3.31279e-06	0.000238026	GO:0003831,GO:0003945,GO:0005975,GO:0016020,GO:0016021,GO:0016740,GO:0016757	beta 14 galactosyltransferase;Smp_146430	Putative beta-1,4-galactosyltransferase [Source:UniProtKB/TrEMBL;Acc:G4VRQ9]	_	_
SmVG_022204:Smp_126500	6.09217	8.2631	6.37092	6.56879	5.78806	4.41833	4.62031	4.61689	-0.489342	0.0008	0.0165775	10.2419	7.22482	4.95636	5.26026	3.73813	3.48236	2.6748	3.03251	-0.564063	9.066e-05	0.00514231	7.60525	5.21557	4.61583	3.84314	3.16588	3.19106	2.49164	2.175	-0.639517	1.06175e-05	0.000576695		tensin C1 domain containing phosphatase;Smp_126500	Putative tensin [Source:UniProtKB/TrEMBL;Acc:G4VN41]	_	_
SmVG_022204:Smp_126510	6.09217	8.2631	6.37092	6.56879	5.78806	4.41833	4.62031	4.61689	-0.489342	0.0008	0.0165775	10.2419	7.22482	4.95636	5.26026	3.73813	3.48236	2.6748	3.03251	-0.564063	9.066e-05	0.00514231	7.60525	5.21557	4.61583	3.84314	3.16588	3.19106	2.49164	2.175	-0.639517	1.06175e-05	0.000576695		hypothetical protein;note=predicted by EVM2;Smp_126510	Putative uncharacterized protein [Source:UniProtKB/TrEMBL;Acc:G4VN40]	_	_
Smp_131570	7.08679	7.67681	5.54467	6.92102	5.56354	4.80952	4.05616	4.98273	-0.488215	0.0015	0.0253677	7.3673	5.73954	2.76661	4.07537	2.30725	2.7388	1.49395	1.82975	-0.667132	0.00121552	0.0304534	5.01027	3.84723	2.88464	2.81856	2.30411	2.48522	1.64395	1.51507	-0.59002	0.000211372	0.00568958	GO:0004221,GO:0006511,GO:0016579,GO:0036459	ubiquitin carboxyl terminal hydrolase;Smp_131570	Ubiquitin-specific peptidase 9X (C19 family) [Source:UniProtKB/TrEMBL;Acc:G4VTI3]	_	_
Smp_172400	7.61061	7.79647	5.56654	7.28765	6.13552	4.40337	3.95787	5.66707	-0.487056	0.0028	0.0398095	9.93032	7.93703	5.62505	6.51603	4.44952	5.68271	3.38963	3.77226	-0.383957	0.00184783	0.0392631	6.01638	4.56382	3.52222	3.64075	2.63949	3.31638	1.93559	1.92605	-0.566759	0.00183702	0.026274	GO:0000166,GO:0005488,GO:0005515,GO:0005524,GO:0005622,GO:0005886,GO:0005942,GO:0007154,GO:0016301,GO:0016303,GO:0016310,GO:0016740,GO:0016772,GO:0016773,GO:0035005,GO:0035091,GO:0036092,GO:0046854,GO:0048015	phosphatidylinositol 4 phosphate 3 kinase C2;Smp_172400	Phosphatidylinositol-4,5-bisphosphate 3-kinase catalytic subunit alpha PI3K [Source:UniProtKB/TrEMBL;Acc:G4VAN8]	gi|157671929|ref|NP_002636.2|	phosphatidylinositol-4-phosphate 3-kinase C2 domain-containing subunit alpha [Homo sapiens]
Smp_003140	23.1781	25.071	23.8978	19.8276	17.1286	16.1743	15.3967	17.0126	-0.485073	0.00075	0.0158697	30.9338	25.0567	22.8352	15.954	13.6643	14.4519	11.7641	10.5173	-0.446806	1.31241e-06	0.000189726	19.6863	14.6261	15.6063	9.32604	8.83731	9.41256	7.39401	5.62774	-0.608737	5.23331e-06	0.000337761	GO:0005515,GO:0005768,GO:0006897,GO:0007154,GO:0016050,GO:0019898,GO:0035091	sorting nexin 32;Smp_003140	Putative sorting nexin [Source:UniProtKB/TrEMBL;Acc:G4V6X9]	gi|23111038|ref|NP_003091.2|	sorting nexin-2 [Homo sapiens]
Smp_160820	11.8577	14.6351	12.7457	9.99685	9.345	9.05993	9.34267	7.43015	-0.485031	0.00405	0.049669	16.8127	12.1978	12.196	7.7049	8.2869	7.01977	7.37787	5.21534	-0.37288	0.000660576	0.0199713	10.4915	7.20511	7.77429	4.39847	5.00528	4.25585	4.34384	2.80497	-0.555435	0.00127544	0.020276	GO:0016020,GO:0016021	hypothetical protein;Smp_160820	Putative uncharacterized protein [Source:UniProtKB/TrEMBL;Acc:G4VFV3]	_	_
Smp_142890	9.09483	10.0592	9.57842	7.29675	6.40198	6.07427	6.83523	6.47086	-0.482782	0.004	0.0493918	14.2567	10.6805	10.6453	6.80691	6.8787	7.74739	6.04542	4.59637	-0.337082	0.00226041	0.0438047	8.6736	6.04666	6.78504	3.86881	4.10841	4.65943	3.51371	2.39328	-0.495061	0.00239241	0.0308343	GO:0004842,GO:0005622,GO:0005634,GO:0005737,GO:0006464,GO:0016567,GO:0016874,GO:0042787	E3 ubiquitin protein ligase HERC4;Smp_142890	Putative hect E3 ubiquitin ligase [Source:UniProtKB/TrEMBL;Acc:G4VNS7]	gi|7657152|ref|NP_055421.1|	probable E3 ubiquitin-protein ligase HERC3 [Homo sapiens]
Smp_028030	18.8179	22.713	17.0032	15.6537	13.8471	14.6143	10.6573	13.99	-0.482233	0.0007	0.0153523	24.1948	18.1026	14.7428	11.8736	11.2934	11.5931	7.72534	7.34429	-0.419606	7.11417e-05	0.00436463	15.0432	10.2304	9.36061	6.68982	7.06579	7.14485	4.59036	3.80486	-0.576912	0.000379416	0.00865895	GO:0005096,GO:0005515,GO:0005622,GO:0005737,GO:0007165,GO:0030336,GO:0043547,GO:0048365	slit robo rho gtpase activating protein 1;Smp_028030	Putative slit-robo rho gtpase activating protein [Source:UniProtKB/TrEMBL;Acc:G4V633]	gi|258613907|ref|NP_001158213.1|	rho GTPase-activating protein 4 isoform 1 [Homo sapiens]
Smp_169960	30.9896	32.0325	34.8553	25.6091	25.7285	22.8015	20.8379	19.2441	-0.478779	0.00335	0.04467	42.0601	35.0987	37.1105	21.5149	21.5155	19.9366	18.7466	16.7373	-0.372216	0.000499707	0.0166636	25.3929	19.9692	22.8919	11.9769	12.5405	11.6131	10.5492	8.49136	-0.567861	0.00037957	0.00865895	GO:0004721,GO:0004725,GO:0006470,GO:0008138,GO:0016311,GO:0016787,GO:0016791,GO:0035335	dual specificity protein phosphatase;Smp_169960	Putative dual specificity protein phosphatase [Source:UniProtKB/TrEMBL;Acc:G4VLR2]	gi|29826315|ref|NP_542178.2|	dual specificity protein phosphatase 15 isoform a [Homo sapiens]
Smp_142650	24.1523	28.8442	25.1492	19.6584	16.5586	17.9652	16.0959	19.5899	-0.478227	0.001	0.0196383	42.1217	30.5164	30.6105	19.6293	20.1852	22.802	16.5693	12.5055	-0.359602	0.000387984	0.0144631	25.4976	17.4242	19.0071	10.8332	11.8593	13.2687	9.35978	6.37363	-0.542955	0.000296635	0.00733549	GO:0005515	hypothetical protein;Smp_142650.2	Putative uncharacterized protein [Source:UniProtKB/TrEMBL;Acc:G4V656]	_	_
SmVG_000342:Smp_020360	167.335	190.026	147.547	125.942	117.454	128.505	98.054	109.119	-0.477366	0.00155	0.0260181	245.149	188.223	159.872	116.277	122.298	114.19	87.8983	81.1384	-0.372776	0.000256269	0.0108522	150.619	109.954	101.45	66.1823	73.7506	68.0482	51.2428	42.9894	-0.562565	0.000326415	0.00794277		hypothetical protein;Smp_020360	Putative uncharacterized protein [Source:UniProtKB/TrEMBL;Acc:G4V8C3]	_	_
SmVG_000342:Smp_020370	167.335	190.026	147.547	125.942	117.454	128.505	98.054	109.119	-0.477366	0.00155	0.0260181	245.149	188.223	159.872	116.277	122.298	114.19	87.8983	81.1384	-0.372776	0.000256269	0.0108522	150.619	109.954	101.45	66.1823	73.7506	68.0482	51.2428	42.9894	-0.562565	0.000326415	0.00794277		reticulon 1;Smp_020370	Putative reticulon/nogo [Source:UniProtKB/TrEMBL;Acc:G4V8C2]	gi|47519490|ref|NP_997403.1|	reticulon-4 isoform D [Homo sapiens]
Smp_010690	23.6541	29.1406	24.9727	19.8614	18.1251	18.0836	17.8283	16.1094	-0.476938	0.00135	0.0235831	32.6997	23.8831	23.4691	15.4508	16.6436	15.6315	14.3763	10.2946	-0.333712	0.000345478	0.0133293	20.0359	13.7825	14.5155	8.64544	9.69002	8.99756	8.22622	5.24171	-0.526226	0.000408641	0.00911841	GO:0005856,GO:0005885,GO:0015629,GO:0030833,GO:0034314	actin related protein 2:3 complex%2C subunit 2;Smp_010690	Putative arp2/3 [Source:UniProtKB/TrEMBL;Acc:G4VMP1]	gi|23238211|ref|NP_690601.1|	actin-related protein 2/3 complex subunit 2 [Homo sapiens]
SmVG_032685:Smp_081370	19.6269	21.4328	15.8643	15.5972	13.1213	12.0432	13.8487	13.2009	-0.473963	0.00115	0.0213294	28.9664	22.1749	17.5774	14.2234	12.8271	14.0942	12.7785	9.19356	-0.34276	0.000245981	0.0106679	17.5439	12.7357	11.0076	7.95365	7.57207	8.23489	7.30671	4.7378	-0.527223	0.000243989	0.00632499		microtubule associated protein 1S;Smp_081370	Putative uncharacterized protein [Source:UniProtKB/TrEMBL;Acc:G4M0I4]	_	_
SmVG_032685:Smp_166030	19.6269	21.4328	15.8643	15.5972	13.1213	12.0432	13.8487	13.2009	-0.473963	0.00115	0.0213294	28.9664	22.1749	17.5774	14.2234	12.8271	14.0942	12.7785	9.19356	-0.34276	0.000245981	0.0106679	17.5439	12.7357	11.0076	7.95365	7.57207	8.23489	7.30671	4.7378	-0.527223	0.000243989	0.00632499		erythrocyte membrane protein;Smp_166030	Erythrocyte membrane protein, putative [Source:UniProtKB/TrEMBL;Acc:G4M0I3]	_	_
Smp_074080	33.9584	38.4129	25.9152	29.8699	23.8365	25.0809	19.9013	23.5624	-0.472235	0.0013	0.023022	39.8512	30.086	21.5077	20.176	20.087	19.644	14.154	12.0498	-0.347532	0.00144933	0.0340079	23.6889	16.8575	13.0644	10.9075	11.3965	11.1399	7.80079	5.96085	-0.535048	0.00090005	0.0158495	GO:0000166,GO:0004672,GO:0005524,GO:0006468,GO:0016301,GO:0016310,GO:0016772	serine:threonine protein kinase NLK;Smp_074080	Serine/threonine kinase [Source:UniProtKB/TrEMBL;Acc:G4VGJ2]	gi|149408126|ref|NP_057315.3|	serine/threonine-protein kinase NLK [Homo sapiens]
Smp_176130	11.2505	12.7121	9.81696	9.03312	7.23861	8.31329	7.08544	8.25493	-0.470793	0.0016	0.0266096	16.5546	13.1719	10.6626	8.43202	9.4643	9.58293	6.66888	5.10131	-0.29974	0.00235076	0.0447962	9.84774	7.34922	6.20261	4.50584	5.2357	5.17816	3.5316	2.48947	-0.474286	0.00241485	0.0310359		plasma membrane calcium transporting ATPase;Smp_176130
Smp_070310	8.27966	10.8091	7.56428	7.52301	5.93969	6.46624	5.58556	6.73628	-0.466852	0.00345	0.0455987	14.3132	9.5273	8.07546	7.00059	6.43718	6.93386	4.94435	4.23548	-0.363859	0.000334046	0.0131704	8.65133	5.54626	5.05767	3.94233	3.81243	4.01839	2.89034	2.16608	-0.555471	0.000659328	0.0125341	GO:0005096,GO:0005097,GO:0005622,GO:0006886,GO:0012505,GO:0017137,GO:0031338,GO:0032313,GO:0032851,GO:0090630	ecotropic viral integration site 5 protein;Smp_070310	Putative ecotropic viral integration site [Source:UniProtKB/TrEMBL;Acc:G4VTA3]	gi|229577000|ref|NP_001153416.1|	EVI5-like protein isoform 1 [Homo sapiens]
Smp_029390	93.5483	108.536	95.0815	88.6843	77.7821	67.5466	68.4798	65.6964	-0.465166	0.0008	0.0165775	143.431	109.308	106.112	81.483	73.2978	73.5667	66.7969	52.9833	-0.320861	0.000116713	0.00630001	83.7559	59.7601	62.8022	42.4584	40.5001	40.3765	35.4553	24.9682	-0.480112	3.12431e-05	0.00132261	GO:0005524,GO:0006810,GO:0006811,GO:0015991,GO:0015992,GO:0016787,GO:0016820,GO:0033178,GO:0033180,GO:0046034	vacuolar V type H(+) ATPase B subunit;Smp_029390	ATP synthase subunit beta vacuolar,putative [Source:UniProtKB/TrEMBL;Acc:G4LWA8]	gi|19913426|ref|NP_001683.2|	V-type proton ATPase subunit B, kidney isoform [Homo sapiens]
Smp_046060	91.154	95.5731	68.6781	88.8148	74.7637	61.0468	49.8504	64.8662	-0.458364	0.0032	0.0435722	142.546	118.805	89.2215	93.9796	74.2737	80.8305	54.4257	60.9943	-0.327568	0.0013136	0.0318286	82.3117	64.8823	52.7758	49.3765	40.9829	44.1745	29.234	29.2809	-0.485998	0.00173403	0.0251948	GO:0000166,GO:0003774,GO:0003779,GO:0005515,GO:0005524,GO:0016459	myosin heavy chain%2C non muscle;Smp_046060	Putative myosin-10 (Myosin heavy chain, nonmuscle IIb) (Nonmuscle myosin heavy chain IIb) (NMMHC II-b) (NMMHC-IIB) (Cellular myosin heavy chain, type B) (Nonmuscle myosin heavy chain-B) (NMMHC-B) [Source:UniProtKB/TrEMBL;Acc:G4VPS2]	gi|224831241|ref|NP_001139281.1|	myosin-14 isoform 3 [Homo sapiens]
SmVG_008822:Smp_128730	42.8951	44.2784	37.8801	43.7318	40.8253	26.4428	28.0602	27.5664	-0.457766	0.0018	0.0288192	58.1569	48.53	40.5801	39.8813	27.0591	29.0082	24.6206	27.3517	-0.374199	0.000483906	0.0164046	34.9336	27.4271	24.8479	21.8833	15.763	16.7054	13.9177	13.799	-0.532613	0.000325982	0.00794277		protein transport protein Sec24A;Smp_128730	Sec24-related A, B [Source:UniProtKB/TrEMBL;Acc:G4VC64]	gi|116174780|ref|NP_068817.1|	protein transport protein Sec24A [Homo sapiens]
SmVG_008822:Smp_128740	42.8951	44.2784	37.8801	43.7318	40.8253	26.4428	28.0602	27.5664	-0.457766	0.0018	0.0288192	58.1569	48.53	40.5801	39.8813	27.0591	29.0082	24.6206	27.3517	-0.374199	0.000483906	0.0164046	34.9336	27.4271	24.8479	21.8833	15.763	16.7054	13.9177	13.799	-0.532613	0.000325982	0.00794277		protein transport protein sec24b;Smp_128740	Sec24-related A, B [Source:UniProtKB/TrEMBL;Acc:G4VC63]	gi|112382212|ref|NP_006314.2|	protein transport protein Sec24B isoform a [Homo sapiens]
Smp_124240	52.4481	54.7554	56.22	48.7334	48.1739	33.7412	40.9617	31.9782	-0.454213	0.00215	0.0330718	71.1226	59.0311	59.9129	45.4339	32.7537	34.5494	36.8525	30.7375	-0.376626	4.96357e-05	0.00330301	42.7873	33.6161	37.1643	25.089	18.9775	20.0671	20.8255	15.5091	-0.548537	6.37588e-05	0.00233654	GO:0005890,GO:0006813,GO:0006814,GO:0016020,GO:0016021	sodium:potassium dependent atpase beta subunit;Smp_124240	Putative sodium/potassium-dependent atpase beta subunit; Sodium/potassium ATPase1 beta subunit [Source:UniProtKB/TrEMBL;Acc:C4PY08]	gi|4502277|ref|NP_001668.1|	sodium/potassium-transporting ATPase subunit beta-1 [Homo sapiens]
Smp_083730	361.986	391.924	347.662	303.627	328.752	252.546	199.432	245.312	-0.453687	0.0037	0.0469083	592.256	477.194	432.452	319.173	290.78	294.2	206.135	251.175	-0.374639	0.00128146	0.0316017	358.228	271.289	267.767	174.972	170.158	169.482	116.432	126.956	-0.540481	0.00105433	0.0178161		hypothetical protein;Smp_083730	Putative uncharacterized protein [Source:UniProtKB/TrEMBL;Acc:G4V6T7]	_	_
SmVG_009094:Smp_039340	22.918	24.3585	17.3271	19.9589	16.9127	16.3838	13.5692	15.0322	-0.450129	0.002	0.0312986	33.5958	26.4711	18.854	18.3244	17.2547	15.9197	12.5249	11.0723	-0.357901	0.000247256	0.0106864	20.3942	15.1583	11.8072	10.2467	10.1686	9.26508	7.12582	5.65797	-0.545278	0.000331137	0.00796254		hypothetical protein;Smp_039340	Putative uncharacterized protein [Source:UniProtKB/TrEMBL;Acc:G4VDD7]	_	_
SmVG_009094:Smp_143520	22.918	24.3585	17.3271	19.9589	16.9127	16.3838	13.5692	15.0322	-0.450129	0.002	0.0312986	33.5958	26.4711	18.854	18.3244	17.2547	15.9197	12.5249	11.0723	-0.357901	0.000247256	0.0106864	20.3942	15.1583	11.8072	10.2467	10.1686	9.26508	7.12582	5.65797	-0.545278	0.000331137	0.00796254		hypothetical protein;Smp_143520	Putative uncharacterized protein [Source:UniProtKB/TrEMBL;Acc:G4VDD9]	_	_
SmVG_009094:Smp_143530	22.918	24.3585	17.3271	19.9589	16.9127	16.3838	13.5692	15.0322	-0.450129	0.002	0.0312986	33.5958	26.4711	18.854	18.3244	17.2547	15.9197	12.5249	11.0723	-0.357901	0.000247256	0.0106864	20.3942	15.1583	11.8072	10.2467	10.1686	9.26508	7.12582	5.65797	-0.545278	0.000331137	0.00796254		hypothetical protein;Smp_143530	Putative uncharacterized protein [Source:UniProtKB/TrEMBL;Acc:G4VDD8]	_	_
SmVG_011538:Smp_074010	23.6738	24.7562	21.5546	19.3226	18.5696	15.7988	14.7353	16.3148	-0.449075	0.0028	0.0398095	37.649	30.8371	27.3132	20.4511	18.6456	19.9547	16.3777	14.5714	-0.333503	7.24431e-05	0.0044229	23.0007	17.8266	17.1194	11.5473	11.0966	11.7973	9.4464	7.6102	-0.497931	8.06179e-05	0.00277599		8 oxoguanine DNA glycosylase;Smp_074010.2	Putative 8-oxoguanine DNA glycosylase [Source:UniProtKB/TrEMBL;Acc:G4VGK0]	gi|4505495|ref|NP_002533.1|	N-glycosylase/DNA lyase isoform 1a [Homo sapiens]
SmVG_011538:Smp_074010.2	23.6738	24.7562	21.5546	19.3226	18.5696	15.7988	14.7353	16.3148	-0.449075	0.0028	0.0398095	37.649	30.8371	27.3132	20.4511	18.6456	19.9547	16.3777	14.5714	-0.333503	7.24431e-05	0.0044229	23.0007	17.8266	17.1194	11.5473	11.0966	11.7973	9.4464	7.6102	-0.497931	8.06179e-05	0.00277599		8 oxoguanine DNA glycosylase;Smp_074010.2
SmVG_011538:Smp_074020	23.6738	24.7562	21.5546	19.3226	18.5696	15.7988	14.7353	16.3148	-0.449075	0.0028	0.0398095	37.649	30.8371	27.3132	20.4511	18.6456	19.9547	16.3777	14.5714	-0.333503	7.24431e-05	0.0044229	23.0007	17.8266	17.1194	11.5473	11.0966	11.7973	9.4464	7.6102	-0.497931	8.06179e-05	0.00277599		AP 2 complex subunit alpha 2;Smp_074020	Putative alpha adaptin carboxyl-terminal domain [Source:UniProtKB/TrEMBL;Acc:G4VGJ9]	gi|19913414|ref|NP_055018.2|	AP-2 complex subunit alpha-1 isoform 1 [Homo sapiens]
Smp_058450	12.85	12.4079	10.2706	11.1709	11.2317	7.61758	6.9065	8.45241	-0.449062	0.0037	0.0469083	16.422	14.4957	10.8457	10.1128	7.55024	8.53595	6.26219	7.53656	-0.373768	0.0017802	0.0386027	9.83893	8.18237	6.78569	5.59631	4.39487	4.93065	3.56687	3.75729	-0.547279	0.000825366	0.014855	GO:0005515	protein phosphatase 1 regulatory subunit;Smp_058450	Protein phosphatase 1 regulatory inhibitor subunit 16a, putative [Source:UniProtKB/TrEMBL;Acc:G4LX82]	_	_
Smp_095910	68.179	74.6381	74.993	57.267	53.4049	45.2011	55.0093	48.6825	-0.443355	0.0018	0.0288192	116.875	91.6574	97.8253	61.6283	58.6665	60.9909	59.4332	44.2412	-0.313747	0.000295677	0.0119959	69.0965	51.0201	59.0821	33.0418	33.2569	34.3067	32.5705	21.7211	-0.474269	0.000292778	0.00725978	GO:0000166,GO:0003924,GO:0005047,GO:0005525,GO:0005785,GO:0006184,GO:0006614,GO:0006810,GO:0006886,GO:0017111	signal recognition particle receptor subunit;Smp_095910	Putative signal recognition particle receptor alpha subunit (Sr-alpha) [Source:UniProtKB/TrEMBL;Acc:G4VDN9]	gi|295424842|ref|NP_001171313.1|	signal recognition particle receptor subunit alpha isoform 2 [Homo sapiens]
Smp_162040	98.3529	96.439	97.6955	86.5819	81.3177	63.6791	67.5408	66.4119	-0.442458	0.0019	0.0301525	114.334	98.9197	92.6492	66.9635	56.3057	61.1863	52.0421	45.8389	-0.368836	8.85901e-06	0.000960516	67.585	54.9441	56.1607	35.9517	31.9048	34.5647	28.5542	22.4928	-0.547372	4.75662e-06	0.000316818	GO:0016020,GO:0016021	Transmembrane 9 superfamily protein;Smp_162040	Putative transmembrane 9 superfamily member [Source:UniProtKB/TrEMBL;Acc:G4V6Z5]	_	_
Smp_145420	11.4613	13.0705	9.68105	10.5684	10.1919	7.83295	6.94209	8.0102	-0.44143	0.0029	0.0407174	16.5763	12.6239	9.79092	9.26958	7.72593	8.34274	6.15296	6.25304	-0.346252	0.000401896	0.0145667	9.93494	7.18828	6.06865	5.10488	4.52096	4.83834	3.48849	3.21232	-0.513093	0.000598097	0.0117792	GO:0002116,GO:0004872,GO:0005515,GO:0005622,GO:0005887,GO:0007165,GO:0007275,GO:0008045,GO:0016020,GO:0016021,GO:0017154,GO:0030334,GO:0048841,GO:0071526,GO:1902287	plexin A3;Smp_145420	Putative plexin [Source:UniProtKB/TrEMBL;Acc:G4VIV2]	gi|262118282|ref|NP_115618.3|	plexin-A1 precursor [Homo sapiens]
SmVG_007407:Smp_081410	43.202	46.3906	42.4774	40.8173	34.6667	30.8094	34.0648	27.8449	-0.440628	0.0035	0.0458561	71.0639	56.819	53.6185	42.262	37.2832	36.4111	34.7065	29.6049	-0.298633	0.00136218	0.0327574	42.1208	31.6332	32.4345	22.5663	21.0836	20.6652	19.0947	14.4427	-0.447877	0.000419832	0.00929847		serine:threonine protein kinase 3;Smp_081410
SmVG_007407:Smp_094090	43.202	46.3906	42.4774	40.8173	34.6667	30.8094	34.0648	27.8449	-0.440628	0.0035	0.0458561	71.0639	56.819	53.6185	42.262	37.2832	36.4111	34.7065	29.6049	-0.298633	0.00136218	0.0327574	42.1208	31.6332	32.4345	22.5663	21.0836	20.6652	19.0947	14.4427	-0.447877	0.000419832	0.00929847		serine:threonine protein kinase 3;Smp_094090	Serine/threonine kinase [Source:UniProtKB/TrEMBL;Acc:G4LV74]	gi|6005810|ref|NP_009112.1|	mitogen-activated protein kinase kinase kinase kinase 1 isoform 2 [Homo sapiens]
Smp_131700	20.3173	21.3195	15.957	16.852	13.4858	13.615	13.7235	14.087	-0.439086	0.0024	0.0358172	21.9229	17.8457	13.465	11.9724	11.2474	12.1582	10.0243	7.10416	-0.303502	0.000654137	0.0198243	13.0939	10.0099	8.18757	6.5851	6.41703	6.95552	5.56644	3.58951	-0.473811	0.000798236	0.0145387	GO:0000166,GO:0004672,GO:0004674,GO:0004697,GO:0005515,GO:0005524,GO:0005622,GO:0006468,GO:0016301,GO:0016310,GO:0016740,GO:0016772,GO:0018105,GO:0035556,GO:0046872	protein kinase c epsilon type;Smp_131700	Serine/threonine kinase [Source:UniProtKB/TrEMBL;Acc:G4VE95]	gi|4885563|ref|NP_005391.1|	protein kinase C epsilon type [Homo sapiens]
Smp_003620	31.9051	39.707	38.0468	30.904	28.9297	25.493	23.2448	26.0308	-0.438822	0.00325	0.0439872	53.1725	39.3154	43.9145	30.0066	27.5132	30.3495	23.0421	21.7724	-0.305024	0.000374563	0.0141044	31.7252	22.1107	26.7689	16.2109	15.6596	17.2024	12.6908	10.6596	-0.459355	0.000405807	0.00911841	GO:0000166,GO:0005525,GO:0007049,GO:0031105	septin;Smp_003620	Putative septin [Source:UniProtKB/TrEMBL;Acc:G4V6M1]	gi|148352331|ref|NP_001779.3|	septin-7 isoform 1 [Homo sapiens]
Smp_085290	199.114	215.017	215.186	155.611	166.864	139.194	138.435	137.547	-0.431441	0.0026	0.0378006	564.029	465.476	469.843	295.57	268.994	285.491	246.577	229.473	-0.358403	0.000211917	0.0097273	346.366	271.588	299.458	168.342	162.952	170.228	143.967	120.657	-0.536527	0.000185852	0.00520216		Tropomyosin 1%2Cs 9A:A:B;Smp_085290	Tropomyosin, putative [Source:UniProtKB/TrEMBL;Acc:G4LV43]	_	_
Smp_137020	49.7454	56.925	54.5097	47.2961	48.9006	34.5065	37.0771	34.4979	-0.427781	0.0034	0.0451364	67.2329	51.6818	52.1701	36.8433	31.678	33.4371	31.0709	28.8763	-0.318856	0.000845969	0.0237215	41.916	30.3316	33.3088	21.1237	19.1914	20.1295	18.4681	15.4191	-0.472078	0.000832678	0.0149277	GO:0005622,GO:0006810	phosphatidylinositol transfer protein alpha;Smp_137020	Phosphatidylinositol transfer protein [Source:UniProtKB/TrEMBL;Acc:G4VIB5]	gi|32307140|ref|NP_036549.2|	cytoplasmic phosphatidylinositol transfer protein 1 isoform a [Homo sapiens]
Smp_045560	114.357	124.09	116.158	113.337	104.539	79.6078	90.4062	73.8053	-0.425759	0.0031	0.0427923	181.975	138.975	127.732	105.466	82.092	80.4868	81.6112	72.3473	-0.369996	3.49539e-05	0.00264829	111.709	81.2344	80.6137	59.3534	49.21	47.8181	47.2562	37.9082	-0.542078	4.8102e-05	0.00190839	GO:0005509,GO:0005544	annexin;Smp_045560	Annexin [Source:UniProtKB/TrEMBL;Acc:G4VI62]	gi|51895795|ref|NP_004297.2|	annexin A13 isoform a [Homo sapiens]
Smp_129050	35.5551	35.6712	32.9271	33.62	32.981	24.2718	20.9398	25.0005	-0.416949	0.0038	0.0477064	43.883	37.7005	31.8589	27.9039	22.6172	24.2382	16.7943	19.5774	-0.361766	0.000172506	0.00864386	26.6655	21.6762	19.9226	15.798	13.4944	14.4244	9.8867	10.0925	-0.495302	0.00036698	0.00849921	GO:0000166,GO:0003924,GO:0005515,GO:0005525,GO:0005543,GO:0006184	dynamin 1;Smp_129050	Putative dynamin [Source:UniProtKB/TrEMBL;Acc:G4V9H8]	gi|42544243|ref|NP_056384.2|	dynamin-3 isoform a [Homo sapiens]
Smp_159150	44.3068	52.908	49.3399	39.57	35.716	33.8673	33.9002	35.9428	-0.416768	0.0036	0.0461599	72.7548	53.1821	54.2859	36.677	34.6798	37.3562	30.0433	23.5228	-0.367848	9.13014e-06	0.000981451	43.3956	29.7585	33.1515	19.845	19.822	21.2134	16.5378	11.5928	-0.557797	2.33837e-05	0.00109424	GO:0016020,GO:0016021	hypothetical protein;Smp_159150	Putative uncharacterized protein [Source:UniProtKB/TrEMBL;Acc:G4VAE9]	_	_
Smp_017010	65.7025	73.1717	53.8718	65.4456	53.3776	48.5967	41.9747	49.4728	-0.416691	0.0033	0.0444637	89.1639	70.919	53.3877	55.5421	46.0532	48.3847	35.0045	33.5296	-0.327587	0.000107995	0.00590059	53.5557	39.6877	32.6533	30.1335	26.6116	27.5707	19.5758	16.9328	-0.473487	0.000673903	0.0127316	GO:0003677,GO:0003723,GO:0005488,GO:0005515,GO:0016070	hypothetical protein;Smp_017010	Putative uncharacterized protein [Source:UniProtKB/TrEMBL;Acc:G4VTK3]	gi|311771714|ref|NP_001185730.1|	eukaryotic translation initiation factor 4 gamma 3 isoform 1 [Homo sapiens]
SmVG_031352:Smp_031880	48.6351	53.75	52.4259	41.4926	39.7246	34.55	40.7255	32.2892	-0.414435	0.0039	0.0483557	57.7198	45.5197	46.1226	30.427	29.8245	28.2671	30.5853	21.6219	-0.309399	0.000672867	0.0202941	34.4777	25.5714	28.1122	16.4516	17.0792	16.0606	16.9654	10.6438	-0.465099	0.000702004	0.0131806		Immunoglobulin domain containing protein;Smp_031880	Basigin related; Ig domain-containing protein [Source:UniProtKB/TrEMBL;Acc:C4Q5U5]	_	_
SmVG_031352:Smp_198920	48.6351	53.75	52.4259	41.4926	39.7246	34.55	40.7255	32.2892	-0.414435	0.0039	0.0483557	57.7198	45.5197	46.1226	30.427	29.8245	28.2671	30.5853	21.6219	-0.309399	0.000672867	0.0202941	34.4777	25.5714	28.1122	16.4516	17.0792	16.0606	16.9654	10.6438	-0.465099	0.000702004	0.0131806		Coatomer delta subunit;Smp_198920
