# Supplementary material for: Pharmacological inhibition of lysine-specific demethylase 1 (LSD1) induces global transcriptional deregulation and ultrastructural alterations that impair viability in Schistosoma mansoni
Source: PLoS Negl Trop Dis. 2020 Jul 1;14(7):e0008332. doi: 10.1371/journal.pntd.0008332 (PMC7329083; doi:10.1371/journal.pntd.0008332)
Supplement: S7 Table — (XLSX) [file pntd.0008332.s015.xlsx]

## Sheet: Common_Down_Male_Female
						List of commonly downregulated genes_Female_Male
geneID	female: fpkm-treated_1-cuffquant	female: fpkm-treated_3-cuffquant	female: log2(fold_change)-cuffdiff	female: tpm-treated1-kallisto	female: tpm-treated2-kallisto	female: tpm-treated3-kallisto	female: TPM-control3-sailfish	female: TPM-control4-sailfish	female: TPM-treated1-sailfish	male: fpkm-treated_1-cuffquant	male: fpkm-treated_3-cuffquant	male: log2(fold_change)-cuffdiff	male: tpm-treated1-kallisto	male: tpm-treated2-kallisto	male: tpm-treated3-kallisto	male: TPM-control3-sailfish	male: TPM-control4-sailfish	male: TPM-treated1-sailfish	TPM-treated2-sailfish	TPM-treated3-sailfish	TPM-treated4-sailfish	log2FC-edgeR	p-value-edgeR
Smp_164550	0	0	#NAME?	7.68166	4.072	14.5387	263.739	235.591	8.56986	3.98617	6.1027	-5.74081	45.8388	58.9822	21.0723	1427.4	1219.67	33.1214	55.7989	20.9766	22.1232	-4.82758	2.54702e-125
Smp_000755	27.0282	36.1065	-1.3622	8.817	19.4357	15.8946	34.2516	44.7836	4.50588	1.53262	1.16325	-4.66204	1.35189	1.85613	2.1644	33.9296	39.2702	0.667313	1.03699	1.15193	0.73434	-4.74825	5.17709e-161
SmVG_016723	1.51596	3.38662	-3.84369	0.307025	1.75555	1.54985	18.2092	15.3344	0.168356	0.441018	0.372575	-5.61228	0.447046	0.728964	0.855878	13.2569	10.8631	0.271015	0.444388	0.482111	0.619967	-4.39191	6.35465e-75
Smp_160360	7.98026	7.98443	-0.445215	3.28223	5.4884	4.50736	5.0643	6.80741	1.81024	6.28894	5.68429	-4.30553	3.53717	6.44229	2.95936	62.555	68.0131	1.90167	3.75744	1.71476	3.04552	-4.22003	3.17806e-180
Smp_164320	1.48371	4.90111	-4.48602	0.454317	1.41506	3.1967	35.7988	39.971	0.238792	0.666572	0.78381	-4.29294	0.473034	1.02505	1.50977	15.8404	17.1621	0.237885	0.588345	0.824902	0.808213	-4.20331	9.74506e-64
Smp_196830	0	0	#NAME?	0	1.831	5.46518	63.9931	60.3614	0	0	0	#NAME?	0.6574	2.93586	2.08158	54.4011	55.1235	1.31948	2.60736	2.39306	2.70752	-4.19494	1.67608e-53
Smp_136730	281.059	967.164	-2.51469	116.246	212.366	466.795	1502.07	1682.7	65.6762	12.9977	23.0353	-4.34896	7.79212	13.3604	45.8056	299.691	358.208	4.23514	7.79317	25.3579	14.3603	-4.14128	8.74119e-19
Smp_149930	0.546525	1.12112	-2.04369	0.265833	0.294073	0.640049	1.65864	1.37671	0.126448	0.204091	0.0755333	-4.71466	0.319432	0.366024	0.160296	3.43131	3.82022	0.158714	0.21863	0.10425	0.0557219	-4.08435	4.7338e-61
Smp_008610	52.1652	139.938	-2.35106	15.3177	35.3954	58.7699	218.809	223.911	7.32384	9.64683	12.8472	-4.01204	3.86556	9.55676	13.3196	110.602	129.896	1.81039	5.10049	6.76416	6.15567	-4.06048	1.03687e-45
Smp_056460	0.560109	2.40341	-2.54634	3.92288	4.63641	8.26548	19.0565	20.1309	2.2799	1.03056	1.10856	-3.90944	6.71891	5.85777	5.29636	73.8152	89.5304	3.73359	3.54534	3.11918	2.87863	-4.05615	4.17979e-109
Smp_128860	3.14686	4.03493	-1.2833	1.98286	2.00486	2.97351	5.43201	4.49194	1.06747	0.994526	1.28035	-4.02814	1.41437	1.09971	0.640488	14.7953	15.9309	0.711044	0.624415	0.349787	0.645588	-3.98961	1.66748e-62
Smp_126420	0.989034	2.01239	-1.69429	1.15141	0.623458	0.359398	2.201	2.39239	0.525654	2.5609	1.72533	-3.8296	0.909078	2.14149	0.923332	15.5666	15.2564	0.43844	1.16948	0.481292	0.746953	-3.87085	9.44293e-83
Smp_131410	1.37846	1.98125	-3.26718	0.868059	1.23418	1.99695	13.8934	13.811	0.408423	0.647265	0.904764	-3.68083	0.584571	0.756001	0.70993	10.97	9.63489	0.346276	0.435043	0.404555	0.678352	-3.83529	5.77993e-91
Smp_170630	0.816064	2.65029	-3.44146	0.365225	0.573523	1.69973	11.9545	12.0155	0.19922	4.00817	3.25507	-3.80408	2.24238	3.71339	2.31203	30.5691	29.4726	1.1139	2.16487	1.28795	1.58589	-3.80041	2.55456e-195
Smp_143300	0.587115	1.33816	-1.57217	0.341606	0.402417	0.199262	1.3162	1.1046	0.180472	0.323337	0.224696	-3.7947	0.22481	0.342426	0.199377	2.38559	2.93428	0.122194	0.192442	0.119767	0.102965	-3.76411	1.33783e-61
Smp_193350	0.91886	1.99561	-1.46854	0.789294	0.891004	1.44184	3.38429	3.38449	0.413569	0.2822	0.0689386	-3.68983	0.280347	0.28338	0.239958	2.63786	3.09042	0.14037	0.214345	0.165073	0.126772	-3.62654	4.63878e-40
Smp_085180	3.31188	11.3413	-3.2793	0.704245	2.65155	7.4754	42.1114	47.1985	0.367308	1.23752	1.82127	-3.76968	0.446954	1.29202	1.77179	14.6854	15.2509	0.325197	0.830203	1.04094	1.16703	-3.58659	2.74045e-53
SmVG_029173	11.1114	13.1292	-2.76519	1.74232	11.6557	8.74592	112.071	126.614	1.797	1.73639	2.58104	-3.98455	1.30925	3.45539	9.45529	65.4364	71.8431	0.729412	3.4008	6.04403	4.18219	-3.55896	8.00876e-25
Smp_137720	52.9244	125.547	-2.85916	34.5935	80.9814	135.969	794.957	857.592	21.3433	18.9872	24.7993	-3.82946	19.7161	39.8322	55.701	461.386	435.107	12.4306	27.9634	39.1961	36.1496	-3.55597	1.43106e-37
SmVG_000820	0.162175	0.387874	-3.44926	0.087836	0.213447	0.208108	1.20166	1.19791	0.0461183	0.407932	0.149622	-3.6161	0.257423	0.393862	0.045709	2.31696	1.8085	0.139373	0.195313	0.0765813	0.125424	-3.49373	2.21554e-37
Smp_172590	118.55	297.096	-2.32121	34.3815	79.5267	131.199	475.904	489.095	17.8104	31.3303	58.5607	-3.40151	14.3487	32.7017	62.4204	321.975	354.554	7.1561	18.3123	32.9585	30.2004	-3.48352	1.44664e-20
Smp_016490	301.445	780.157	-2.41784	87.8653	226.615	275.736	1184.55	1403.87	49.9322	83.3024	119.398	-3.53983	61.1977	87.3017	144.272	801.182	907.376	32.1463	51.9127	83.4739	74.3198	-3.45456	6.27712e-34
Smp_001100	1.14936	2.60903	-2.48028	1.34596	1.09265	1.14224	8.21246	7.21192	0.720685	3.15217	1.85196	-3.50844	2.35877	4.45905	3.48582	26.3472	26.8677	1.16302	2.6001	1.956	1.57505	-3.40829	8.4778e-111
Smp_014570.2	134.025	321.116	-2.01545	45.1411	117.693	193.383	695.339	821.74	23.8643	30.6988	44.9946	-3.09481	29.2737	53.7534	81.4982	432.859	441.851	14.6001	30.6674	43.7146	38.3416	-3.37944	5.80121e-34
Smp_002600	116.966	251.324	-2.06101	43.7535	92.6099	150.162	414.823	435.192	21.5236	26.5603	32.9063	-3.28738	17.9961	32.7841	46.2225	239.086	248.386	8.52413	17.7633	23.5134	19.2859	-3.37935	1.94348e-39
Smp_174700	0.59294	1.92053	-2.82552	0.0959579	0.313974	0.557583	2.70478	2.41055	0.0652449	0.60546	0.443881	-3.27624	0.1726	0.498219	0.433834	2.6008	2.72747	0.0880339	0.287	0.237046	0.211397	-3.30691	4.12654e-49
Smp_049850	0.909692	0.933259	-1.95026	0.527668	0.767442	1.27175	2.97126	2.47657	0.46355	1.24664	1.7915	-3.90474	1.07849	1.42236	1.38778	20.0741	16.5835	0.80423	1.26688	1.28808	1.3362	-3.28974	6.30329e-97
Smp_028870	71.4187	169.801	-2.19882	37.3165	91.7964	144.739	457.464	523.892	18.7766	16.8151	33.9606	-3.09825	20.9688	30.3541	56.8296	277.466	291.388	10.3507	16.794	30.18	31.5115	-3.24246	4.37733e-26
Smp_211020	1.12221	1.44455	-1.84656	0.766209	0.645472	0.614236	2.04807	2.48374	0.428184	4.94677	2.87452	-3.20401	2.25116	4.62216	3.24235	23.4567	21.5307	1.15305	2.65184	1.8217	1.57557	-3.18037	1.26888e-111
Smp_160830	32.6386	53.394	-2.27636	10.3848	27.3908	29.8904	104.914	120.146	5.34611	6.20373	10.0645	-3.18869	6.51563	9.84103	10.1596	57.4649	65.9072	3.22622	5.56267	5.45411	6.78483	-3.16543	3.5898e-62
Smp_085010	99.121	227.343	-2.43784	20.7058	60.8622	101.788	404.05	454.142	12.2485	35.5672	51.3314	-3.04278	17.9574	33.6809	52.515	262.774	278.241	9.96202	20.3887	31.5585	26.9113	-3.14246	6.37162e-30
Smp_158520	17.0072	20.7128	-1.63194	6.15224	9.75243	7.34243	22.5763	29.8136	3.19627	2.71287	3.09407	-3.01195	1.23026	2.2444	2.696	12.7146	14.3329	0.597205	1.25224	1.41501	1.3756	-3.12722	2.65729e-44
Smp_123880	40.3486	84.1791	-2.86264	16.3198	26.7778	41.8153	263.563	247.473	9.72378	42.8096	32.8333	-2.77896	17.5231	49.0378	40.8905	234.135	212.106	9.70853	30.2068	24.6101	19.8319	-3.09744	4.75881e-38
SmVG_014953:Smp_075800	417.868	1206.56	-2.31213	244.121	580.774	1187.08	4327.37	4598.71	127.733	110.716	201.348	-2.88922	109.975	209.137	396.966	1508.83	1627.05	56.2757	120.772	219.751	197.217	-3.02058	2.729e-18
SmVG_014953:Smp_179170	417.868	1206.56	-2.31213	244.121	580.774	1187.08	4327.37	4598.71	127.733	110.716	201.348	-2.88922	109.975	209.137	396.966	1508.83	1627.05	56.2757	120.772	219.751	197.217	-3.02058	2.729e-18
Smp_149820	1.3352	1.51104	-1.25932	0.944275	1.32738	1.38895	2.74396	3.17971	0.513811	0.701407	0.556677	-2.82095	0.944257	1.09032	1.15202	4.83165	5.41179	0.485155	0.670283	0.643052	0.4323	-3.00563	5.11042e-36
Smp_170280	0.54795	1.28645	-2.36713	0.419949	0.444205	0.574535	2.59843	2.20137	0.223435	3.39221	1.42279	-2.98831	1.7335	3.43378	1.34777	8.7736	10.2711	0.87968	1.96714	0.748121	0.777759	-2.93531	2.94942e-26
Smp_042720	1.65619	1.26233	-2.7731	0.258139	0.957156	0.500372	3.43755	3.19716	0.143843	0.702826	0.569924	-2.8846	0.387937	0.560008	0.41685	3.02246	2.60744	0.202837	0.328744	0.23727	0.248759	-2.92831	1.13857e-35
Smp_146840	2.12882	4.54799	-1.2858	0.753997	1.5236	0.81957	3.31358	3.6702	0.421073	1.49837	1.26092	-2.7814	1.14059	1.52602	0.999552	5.71127	6.76947	0.571416	0.88768	0.552849	0.690167	-2.89983	3.3692e-46
Smp_142490	17.7652	33.4297	-2.34671	3.9753	13.8641	15.4886	51.357	59.5012	1.84913	6.11099	5.91119	-3.12317	4.54507	7.86796	7.2612	35.8849	35.0471	2.16261	4.26464	3.64537	3.93082	-2.88957	4.30116e-52
Smp_155570	17.7414	33.852	-2.74847	10.6024	22.8126	32.8814	221.762	219.861	7.15773	30.8043	19.8524	-1.97474	18.5304	32.4816	26.7289	156.313	160.616	10.8524	21.8277	17.5025	14.6811	-2.88468	2.79781e-70
Smp_006760	3.36656	5.39412	-2.32263	0.828571	2.63418	3.18017	10.7528	10.3973	0.463761	1.81203	1.46473	-3.00421	0.904615	1.79801	1.53804	8.81821	8.06927	0.455608	1.0259	0.883711	0.954434	-2.88267	1.60824e-64
SmVG_006871	2.03738	4.90843	-3.69127	2.53908	2.97184	3.11761	16.3542	15.8978	0.859504	2.70984	2.17277	-3.27545	1.86768	3.40058	4.00063	12.3414	14.9976	0.861123	1.72847	1.43055	1.69147	-2.8823	1.89192e-46
Smp_147070	3.48003	4.35001	-2.49862	1.17276	1.99111	2.46792	10.9094	9.66052	0.647924	7.6785	5.3812	-2.78241	4.9657	6.91775	3.51101	31.2048	30.2603	2.54299	3.99291	1.93247	2.62207	-2.86723	2.47408e-86
Smp_139160	332.872	1212.96	-2.52998	131.221	315.745	804.068	2761.84	2902.93	75.2721	51.7048	101.576	-2.73378	35.199	63.5704	135.679	465.167	553.09	18.973	38.5566	78.933	69.0825	-2.82023	1.70767e-15
Smp_132270	4.38625	8.60156	-1.90358	1.69368	2.57036	2.37514	7.65882	7.34608	0.940646	5.01371	3.54489	-2.79072	1.79614	4.31966	2.51094	13.155	14.9435	0.935378	2.58758	1.41999	1.72605	-2.80623	2.42253e-50
Smp_086480	38.3103	48.9542	-1.01951	14.6163	20.7555	11.4939	35.8883	38.2748	7.88941	42.9886	39.9254	-2.74898	23.1999	35.9233	29.221	177.114	186.683	12.1853	20.987	16.4065	18.4054	-2.78276	7.01424e-126
Smp_202610	185.776	405.05	-2.41477	31.9265	99.4448	120.757	574.624	612.864	19.1372	104.072	157.922	-2.76722	51.0228	87.3537	129.909	561.273	558.116	28.0515	53.7568	79.1926	77.5946	-2.76158	3.83261e-26
Smp_000190	9.61452	16.6672	-2.55533	3.58148	7.39767	8.47447	39.6258	41.2513	1.80805	3.82355	4.22362	-2.74838	3.28684	4.26028	4.28934	20.2745	20.1526	1.64496	2.41786	2.33134	2.44756	-2.71053	3.71765e-104
Smp_055780	4.05096	11.5335	-2.84495	0.732907	2.68144	4.6637	25.3603	25.0806	0.38755	5.60998	6.63182	-2.57171	3.08503	5.59231	5.63456	24.8883	27.0258	1.57493	3.19044	3.03444	3.57379	-2.66322	4.24922e-57
Smp_175390	1.63378	1.66766	-1.37417	0.501189	1.03413	0.5224	1.65367	1.51076	0.278483	1.55188	0.93476	-2.93404	0.955215	1.40246	1.11813	5.60786	6.03846	0.526097	0.880912	0.699682	0.557381	-2.63474	9.32116e-65
Smp_094710	0.99089	2.31046	-1.11546	1.06627	1.90198	1.71762	4.34835	3.64608	0.482321	0.909325	1.15801	-2.63637	1.53275	2.15437	3.00871	12.1148	12.5329	0.698407	1.12647	1.43087	1.28193	-2.6235	1.64634e-32
Smp_212430	3.51794	3.17337	-2.28933	0.353627	0.964495	0.569524	6.56397	10.3973	0.425086	0.403483	0.298329	-2.74656	0.184134	0.284585	0.371044	1.56372	1.97435	0.0928082	0.223158	0.333386	0.207393	-2.6091	1.16022e-23
Smp_146050	1.16029	0.954925	-0.7092	0.713412	0.670442	0.638298	1.24091	1.13496	0.38867	2.00188	3.20127	-2.46345	1.9767	2.1428	2.44573	11.4616	11.2514	1.01737	1.31653	1.41244	1.7724	-2.59674	6.7879e-65
Smp_201130	2.83324	3.36378	-0.907436	1.07652	2.01214	1.1945	2.70412	2.86922	0.568081	3.3788	4.58614	-2.6365	2.72808	3.80554	3.04699	18.466	17.9406	1.45643	2.21239	1.681	2.25903	-2.58495	9.99939e-57
Smp_139240	225.845	568.02	-1.91574	50.3222	126.443	248.493	588.464	739.003	28.9343	56.8591	99.1322	-2.55348	25.398	48.0052	83.9164	259.572	283.399	13.6091	28.5826	48.9954	47.1316	-2.57602	7.67695e-16
Smp_016600	0.94849	1.54133	-1.90902	3.66764	5.54391	7.42589	22.073	20.259	1.935	3.98929	2.79951	-2.19616	4.04844	6.15231	4.81061	20.5474	22.0585	2.06397	3.49764	2.60926	2.64504	-2.57493	1.36644e-106
Smp_197370	10.357	19.6616	-1.88716	10.591	10.3243	11.5333	38.0601	31.7829	4.67724	38.9334	37.7572	-2.58796	34.0684	49.2567	41.8524	166.208	174.943	14.3812	24.2858	18.7964	21.282	-2.57468	7.16807e-125
SmVG_019735:Smp_068700	17.8759	22.7925	-0.431972	6.58795	11.6533	11.107	11.9032	16.6161	3.1557	0.830066	1.01536	-2.47485	0.359146	0.812825	0.48711	2.93137	2.76069	0.208497	0.443338	0.278526	0.472842	-2.57131	7.77964e-35
SmVG_019735:Smp_159370	17.8759	22.7925	-0.431972	6.58795	11.6533	11.107	11.9032	16.6161	3.1557	0.830066	1.01536	-2.47485	0.359146	0.812825	0.48711	2.93137	2.76069	0.208497	0.443338	0.278526	0.472842	-2.57131	7.77964e-35
Smp_187140	124.078	354.054	-2.57872	24.6807	70.3075	131.379	557.85	563.534	13.526	71.2004	85.9668	-2.52975	29.4342	61.7169	76.5559	244.172	257.869	15.2945	35.9854	43.4126	40.4319	-2.55984	2.62285e-23
Smp_003440	2.0067	2.20162	-0.665549	1.69777	1.71947	1.21429	2.29767	2.36137	0.903458	4.14353	3.8173	-2.72037	3.71987	5.54739	4.26975	20.7336	19.7425	1.90313	3.21741	2.29344	2.38174	-2.54881	9.3687e-112
Smp_196840	9.1675	16.9294	-1.55969	6.77584	8.21364	8.02829	25.3081	22.3448	3.03639	25.5966	23.9209	-2.53582	17.6747	30.2843	22.9227	100.154	103.78	7.59445	15.2488	10.5969	12.5721	-2.5381	4.66908e-89
Smp_128940	3.78637	9.91874	-2.21419	0.578426	2.32173	4.2555	12.6854	12.1331	0.303205	2.66344	4.90212	-2.45622	2.05468	2.63199	2.96364	12.5358	13.4773	1.02184	1.5	1.61813	2.47884	-2.53467	1.26348e-37
Smp_098340	53.3782	60.7439	-0.578099	16.4556	27.828	17.2046	27.6581	38.5901	9.15468	3.98442	5.60799	-2.50428	1.51556	3.53267	4.39278	17.3635	15.956	0.794364	2.07952	2.5226	2.53366	-2.52508	1.01964e-29
Smp_164590	4.28331	8.08463	-1.84133	3.45643	4.51667	4.24202	16.347	13.7401	1.69346	20.0837	16.3446	-2.52482	16.854	26.8657	19.2227	82.4198	87.2026	7.84282	14.3609	9.78056	11.2427	-2.46573	2.22268e-98
Smp_162110	0.639925	0.987929	-1.42643	0.409182	0.604096	1.15596	2.40776	2.1593	0.234318	0.379897	0.804515	-2.15458	0.490909	0.885681	0.627673	3.39998	4.13521	0.264573	0.508571	0.347614	0.686934	-2.46501	3.75625e-30
Smp_127370	2.96811	8.85819	-2.23618	0.341188	1.55228	3.55612	10.2226	10.1322	0.191877	5.93484	5.50606	-2.42644	2.10435	4.70344	3.84064	15.1758	13.3471	1.05564	2.69202	2.0633	2.40379	-2.44666	2.77571e-36
Smp_074430	14.0582	27.4894	-2.09299	1.51398	7.83199	10.7326	44.9707	53.6129	2.13193	10.3958	13.4808	-2.64375	3.20742	9.41382	8.66457	42.9717	49.4123	2.48345	7.34468	7.36501	8.67906	-2.44211	6.25086e-22
Smp_151590	2.72996	5.14059	-2.13971	1.04582	2.34	3.55199	10.6968	11.4056	0.523092	1.46405	1.9254	-2.38938	1.51281	2.17537	2.27548	8.84201	8.65896	0.726627	1.24307	1.1913	1.35269	-2.43797	5.28935e-71
Smp_050390	198.834	192.111	-0.616076	116.918	141.233	178.467	178.439	219.097	55.0138	325.345	238.921	-2.41173	304.606	332.036	190.095	869.218	951	140.192	175.248	95.0648	118.184	-2.40981	1.90942e-37
Smp_130070	0.95226	1.67349	-1.74949	0.257464	0.674033	0.759078	2.06783	2.00371	0.133881	1.32371	1.31458	-2.38854	1.08393	1.35265	0.997598	4.69344	5.30862	0.552069	0.774621	0.527715	0.702689	-2.40277	1.7579e-62
Smp_105420	2767.47	5901.04	-1.88684	861.52	1702.87	2224.54	6132.77	6718.96	477.709	716.922	946.95	-2.41631	433.993	657.444	849.252	2483.95	2703.6	227.086	385.742	488.08	481.528	-2.39532	8.01639e-25
SmVG_030160:Smp_166530.1	16.5177	34.8067	-2.42125	4.07688	11.6185	22.3983	73.455	74.2991	2.12556	9.32372	13.618	-2.23461	7.96616	9.59994	11.6485	44.3252	44.1544	3.98837	5.47001	6.19338	8.04329	-2.38748	8.44056e-51
SmVG_030160:Smp_166530.2	16.5177	34.8067	-2.42125	4.07688	11.6185	22.3983	73.455	74.2991	2.12556	9.32372	13.618	-2.23461	7.96616	9.59994	11.6485	44.3252	44.1544	3.98837	5.47001	6.19338	8.04329	-2.38748	8.44056e-51
SmVG_030160:Smp_166540	16.5177	34.8067	-2.42125	4.07688	11.6185	22.3983	73.455	74.2991	2.12556	9.32372	13.618	-2.23461	7.96616	9.59994	11.6485	44.3252	44.1544	3.98837	5.47001	6.19338	8.04329	-2.38748	8.44056e-51
Smp_039810	1.05643	2.10891	-1.26192	0.583923	0.700568	0.715065	2.14379	1.71979	0.31118	2.29763	1.57351	-2.38724	1.96775	2.53164	1.38944	6.1595	7.05801	1.03408	1.46975	0.804095	0.918576	-2.38271	1.52548e-31
SmVG_031722:Smp_102780	1.54484	2.3242	-2.29165	0.330298	1.60191	2.62283	8.71313	9.4452	0.230559	0.926714	1.49722	-2.3603	0.861926	1.46957	1.51682	6.88729	6.33973	0.479633	0.986134	0.999099	1.29569	-2.38223	2.31456e-37
SmVG_031722:Smp_204810	1.54484	2.3242	-2.29165	0.330298	1.60191	2.62283	8.71313	9.4452	0.230559	0.926714	1.49722	-2.3603	0.861926	1.46957	1.51682	6.88729	6.33973	0.479633	0.986134	0.999099	1.29569	-2.38223	2.31456e-37
Smp_124240	24.4602	37.85	-0.815293	18.7835	16.5366	13.2126	31.8949	29.9958	9.88848	44.333	37.5573	-2.33472	32.5819	46.631	32.377	153.882	146.376	16.1693	26.4348	17.4623	20.1589	-2.37266	1.4875e-138
SmVG_025265:Smp_024290	1.19309	2.30682	-2.16472	0.325704	0.667902	0.777505	3.41082	2.74829	0.184718	1.50876	1.08309	-2.39811	0.681837	1.46181	0.946549	4.12023	3.67865	0.37066	0.860232	0.51964	0.539183	-2.3665	8.56119e-44
SmVG_025265:Smp_135340	1.19309	2.30682	-2.16472	0.325704	0.667902	0.777505	3.41082	2.74829	0.184718	1.50876	1.08309	-2.39811	0.681837	1.46181	0.946549	4.12023	3.67865	0.37066	0.860232	0.51964	0.539183	-2.3665	8.56119e-44
Smp_129530	0.88481	1.28158	-1.62244	0.570332	0.734575	0.52619	1.72579	1.74667	0.332275	1.40193	0.837264	-2.42899	0.880181	1.7645	0.315749	2.68893	3.58842	0.459062	1.07849	0.182015	0.49881	-2.34725	3.0389e-10
Smp_181070	103.735	253.858	-1.36088	104.961	133.868	250.378	396.156	435.258	56.4749	16.2678	24.0207	-2.33851	21.2336	27.6391	48.3162	129.2	134.203	11.0701	16.0427	27.2455	24.1023	-2.33268	1.81681e-20
SmVG_008628	74.8929	235.772	-1.73774	33.6602	46.6772	78.2659	266.271	258.608	18.3881	39.0301	45.3745	-2.20328	18.0848	38.7428	39.3978	153.123	126.799	9.38705	22.5574	22.3892	23.2139	-2.32592	5.25257e-35
Smp_121930	11.6298	23.2542	-1.9849	3.69543	9.5311	17.4586	40.9215	42.1188	1.89822	3.97214	6.43541	-2.32122	3.75468	6.20742	6.60355	23.4646	23.421	1.92358	3.57969	3.56628	4.92813	-2.30389	1.75582e-35
Smp_200240	24.1953	39.0817	-1.6359	11.9124	19.275	15.7316	41.7921	46.8435	6.8612	54.6952	51.0094	-2.3941	41.7304	59.8222	51.375	186.505	203.214	22.393	35.8436	30.5847	33.0346	-2.30005	1.87174e-68
SmVG_030892	3.38709	4.98038	-1.61533	2.2764	1.86659	1.94389	6.02957	7.37874	1.32547	13.3416	12.9427	-2.2966	8.18989	11.2309	7.58839	34.8238	38.3813	4.60687	7.12989	4.40112	6.19037	-2.2965	8.02323e-82
SmVG_001558	0.445321	1.91137	-2.39185	0.73885	2.47985	4.18754	13.2639	13.2454	0.405662	0.926392	0.855591	-1.9779	1.74213	3.02162	3.30714	10.425	11.228	0.9402	1.7541	1.91658	1.94732	-2.29614	4.13073e-32
Smp_145320	0.629067	1.96905	-1.99663	0.695164	0.740853	1.63184	3.32746	4.64832	0.39876	1.03759	0.716383	-2.67206	1.56013	1.82434	0.941965	5.30321	5.40339	0.804262	1.04544	0.576086	0.895899	-2.28982	1.78592e-42
Smp_212710	9.09242	14.5736	-2.02773	3.16357	5.46662	6.0718	26.7215	29.2548	1.6723	22.8018	18.8888	-2.0919	11.1463	22.1368	16.6647	64.0263	62.4832	5.64123	12.621	9.14428	9.41005	-2.27182	1.16411e-71
Smp_156960	2.5575	6.08972	-2.63153	1.3225	2.6624	2.06295	20.2931	16.2684	0.821451	37.5718	13.1882	-2.22127	18.7783	52.4015	13.524	92.05	92.6019	9.99891	31.8854	7.71072	10.4644	-2.26905	2.58272e-12
Smp_124760	3.6909	5.75875	-1.68436	1.39073	2.41412	2.1223	6.85288	6.51094	0.730401	2.05372	1.62772	-2.233	1.26957	1.93517	1.06231	4.68174	5.61277	0.6202	1.0913	0.575461	0.818913	-2.26443	6.79806e-45
Smp_194910	1534.29	3918.85	-1.95149	311.183	878.108	1150.9	3647.49	4116.74	178.256	409.325	664.188	-2.25179	199.46	352.8	542.462	1422.61	1439.05	108.364	212.867	319.971	326.186	-2.24928	7.64611e-15
SmVG_019873:Smp_123650	1.81177	3.08626	-1.08642	0.742463	1.18947	1.4721	2.90317	2.42038	0.413747	5.04769	3.27278	-2.22185	3.11014	4.98398	2.80522	11.9373	12.3761	1.57988	2.87289	1.54053	1.71121	-2.24733	2.63559e-54
SmVG_019873:Smp_123660	1.81177	3.08626	-1.08642	0.742463	1.18947	1.4721	2.90317	2.42038	0.413747	5.04769	3.27278	-2.22185	3.11014	4.98398	2.80522	11.9373	12.3761	1.57988	2.87289	1.54053	1.71121	-2.24733	2.63559e-54
Smp_143680	0.852662	1.37508	-1.67671	0.387041	0.615231	0.641555	1.94243	1.91353	0.201091	1.78813	1.82591	-2.22122	1.06342	1.87317	1.07113	4.80982	5.22427	0.52555	1.06288	0.57154	1.00284	-2.24455	4.72021e-50
Smp_149390	1.9723	2.98854	-0.937993	0.658458	1.2517	0.929442	1.96207	1.97797	0.350322	2.4267	2.26505	-2.26069	1.52059	2.33058	1.55678	6.73449	7.3649	0.773783	1.34256	0.871823	1.211	-2.24422	2.77827e-88
Smp_126120	15.0022	33.0905	-2.53195	11.1784	20.5768	46.622	150.279	154.125	5.48483	16.837	19.7648	-2.2159	19.624	33.3927	36.662	109.848	108.03	9.33155	18.1554	18.8949	19.1344	-2.24142	6.06994e-40
Smp_024180	9.82185	16.4748	-2.16298	14.9782	16.9621	32.2049	80.519	93.0791	7.97541	11.3618	14.0579	-2.27453	20.8761	24.7396	32.6718	97.48	92.3232	10.5444	14.2617	17.5987	17.856	-2.23729	6.47146e-34
Smp_150640	295.469	290.263	-0.528743	125.131	227.167	174.621	200.385	308.936	66.9815	7.43343	6.71821	-2.14225	5.17567	8.70021	13.6569	26.5832	34.4667	2.5967	4.98359	7.39438	3.63781	-2.22726	2.87762e-15
Smp_073280	2.09048	3.62661	-0.982691	1.42176	1.29183	1.56955	3.00411	2.31975	0.765078	6.1932	4.67842	-2.26169	3.36475	5.15685	3.40765	13.6917	13.7354	1.71019	2.95536	1.88024	2.42068	-2.20076	5.89421e-92
SmVG_022099:Smp_127880	1.99213	5.20103	-1.90149	1.10376	1.66907	1.80745	6.85061	7.39591	0.630568	4.70743	3.26709	-2.24917	3.23364	5.43584	2.89949	12.8591	13.2111	1.71108	3.18006	1.65472	2.24478	-2.20053	2.09332e-42
SmVG_022099:Smp_145900	1.99213	5.20103	-1.90149	1.10376	1.66907	1.80745	6.85061	7.39591	0.630568	4.70743	3.26709	-2.24917	3.23364	5.43584	2.89949	12.8591	13.2111	1.71108	3.18006	1.65472	2.24478	-2.20053	2.09332e-42
Smp_146790	1.10476	1.76743	-1.20503	0.478659	0.566737	0.397708	1.38932	1.37887	0.280345	2.51886	1.69077	-2.19411	2.01537	2.49379	0.971731	5.89291	6.71516	1.14272	1.50892	0.581355	0.788163	-2.19799	3.44277e-20
SmVG_008690	3.43535	3.44132	-1.64211	4.0408	7.37399	10.1697	20.2431	16.6511	2.49896	4.69315	2.07648	-2.48284	15.4348	17.0203	9.7965	32.8148	48.7403	7.84477	10.1722	5.15052	4.83494	-2.19156	5.02231e-15
Smp_124980	23.3915	34.0708	-1.03947	8.47943	13.057	12.8779	25.4784	24.4253	5.01786	11.9604	11.1673	-2.16338	9.49942	10.5981	8.3126	33.5621	38.3537	5.11366	6.37617	4.95345	5.78541	-2.18643	8.99316e-67
SmVG_035093	0.316836	0.686526	-3.04854	0	0.368432	0.756347	2.53566	4.05516	0.115458	0	0	#NAME?	0.390202	0.2828	0.68349	2.64959	2.0399	0.283835	0.37225	0.28017	0.440926	-2.1755	3.07682e-10
SmVG_011949:Smp_030050	1.06149	1.47503	-2.23933	0.228018	0.560709	0.695723	2.68603	2.49479	0.123751	0.834278	0.596937	-2.07718	0.17382	0.734638	0.508733	1.66122	1.65907	0.0898479	0.434458	0.288881	0.285611	-2.17242	3.09129e-18
SmVG_011949:Smp_138390	1.06149	1.47503	-2.23933	0.228018	0.560709	0.695723	2.68603	2.49479	0.123751	0.834278	0.596937	-2.07718	0.17382	0.734638	0.508733	1.66122	1.65907	0.0898479	0.434458	0.288881	0.285611	-2.17242	3.09129e-18
Smp_165210	2.0749	3.16612	-2.14754	0.646219	1.45547	1.54872	5.51164	5.22814	0.317566	2.37606	2.3002	-2.321	1.86353	2.46857	1.60516	7.11866	7.25805	0.927277	1.46106	0.85934	1.34107	-2.17031	3.24304e-83
Smp_074900	6.89213	11.1308	-1.41797	3.0698	4.8561	6.1237	13.5177	12.706	1.56187	5.50779	7.46675	-2.01335	5.23894	6.3516	5.60964	20.1745	23.2796	2.57763	3.54871	3.00669	4.27649	-2.16113	6.4893e-65
Smp_160300	0.463878	1.0559	-2.64151	0.228086	0.626223	0.844665	4.59189	4.72719	0.157145	0.185619	0.183558	-1.88709	0.235863	0.282971	0.842269	2.2526	2.05588	0.143594	0.250118	0.490045	0.345299	-2.14869	1.20735e-13
Smp_126230	3.61804	6.94022	-1.28498	1.45975	1.31874	2.15981	3.82567	5.25551	1.08799	1.8322	1.68352	-2.37305	1.26146	1.36636	0.741017	5.18756	4.70789	0.839911	1.14905	0.60927	0.868889	-2.14227	1.43195e-26
Smp_074080	10.6797	13.8632	-1.18302	3.19311	6.31133	5.45846	12.0435	13.2694	1.59751	9.32993	7.81793	-2.05959	6.13373	8.01283	6.14333	23.6357	22.3214	3.01895	4.47929	3.2344	3.35202	-2.1331	3.70558e-103
SmVG_034311:Smp_165480	2.65131	3.27012	-1.42095	1.07473	2.05107	1.08515	4.92486	5.4706	0.557282	1.35656	1.68571	-1.72788	1.5754	1.74942	2.5599	6.72884	7.97728	0.778941	0.985028	1.35737	1.05154	-2.12078	6.35776e-22
SmVG_034311:Smp_192300	2.65131	3.27012	-1.42095	1.07473	2.05107	1.08515	4.92486	5.4706	0.557282	1.35656	1.68571	-1.72788	1.5754	1.74942	2.5599	6.72884	7.97728	0.778941	0.985028	1.35737	1.05154	-2.12078	6.35776e-22
SmVG_025684:Smp_163700	2.52725	3.36268	-1.34432	1.46119	2.03693	2.38547	5.68231	6.18489	0.74202	1.03614	1.53369	-1.98433	1.02682	1.39147	1.61936	5.3247	4.68769	0.531083	0.844986	0.876098	1.07871	-2.08967	2.8568e-47
SmVG_025684:Smp_204320	2.52725	3.36268	-1.34432	1.46119	2.03693	2.38547	5.68231	6.18489	0.74202	1.03614	1.53369	-1.98433	1.02682	1.39147	1.61936	5.3247	4.68769	0.531083	0.844986	0.876098	1.07871	-2.08967	2.8568e-47
Smp_167630	1.51461	3.33896	-1.19994	0.885643	1.02197	2.43579	3.08086	3.53292	0.463522	11.992	9.47773	-2.02677	8.6798	11.5135	7.19663	27.2737	29.5862	4.24556	6.47609	3.86676	5.10099	-2.08369	1.03962e-73
Smp_181060	2.16933	4.26439	-1.44304	0.83141	2.20487	5.42646	10.355	9.32021	0.462369	1.78254	3.08095	-2.0109	1.71999	2.57107	1.98186	9.68039	7.11832	0.949633	1.51251	1.02434	2.12439	-2.0771	3.75243e-29
SmVG_029207	1.41059	1.87255	-1.18	1.15976	1.28354	1.72636	2.15426	2.4748	0.490937	5.01115	3.31533	-2.07968	3.91143	5.47035	3.48724	11.1736	10.1285	1.56555	2.62924	1.69393	1.80529	-2.07145	9.57025e-73
SmVG_020021:Smp_141980	0.921067	1.89673	-1.1752	0.263004	0.3427	0.250954	1.22769	1.24774	0.258354	3.37757	2.94312	-2.00985	1.74973	2.10965	1.13467	6.91852	7.65546	1.18479	1.67811	1.07173	1.36102	-2.06473	8.47343e-51
SmVG_020021:Smp_141990	0.921067	1.89673	-1.1752	0.263004	0.3427	0.250954	1.22769	1.24774	0.258354	3.37757	2.94312	-2.00985	1.74973	2.10965	1.13467	6.91852	7.65546	1.18479	1.67811	1.07173	1.36102	-2.06473	8.47343e-51
Smp_167460	0.623771	1.26947	-1.65908	0.183473	0.440244	0.444169	1.07031	1.06227	0.104396	1.52656	0.932985	-2.02695	0.54984	1.50775	0.651741	2.46918	2.79172	0.278116	0.868843	0.354079	0.47726	-2.05449	1.54989e-17
Smp_149010	1.27114	1.77432	-1.30541	0.596833	0.745505	0.452823	1.73279	1.52531	0.324044	3.03005	2.08861	-1.97772	1.45383	2.84399	1.08825	5.01148	5.81107	0.747483	1.66564	0.601792	0.96332	-2.03967	3.22962e-24
SmVG_015690:Smp_119050	18.44	29.8878	-1.18012	15.4279	18.091	18.8199	40.655	33.9769	7.14933	76.3528	77.6317	-2.04504	64.8655	97.1623	77.225	234.477	237.2	28.6126	49.3923	36.6591	45.317	-2.03559	3.5984e-85
SmVG_015690:Smp_135560	18.44	29.8878	-1.18012	15.4279	18.091	18.8199	40.655	33.9769	7.14933	76.3528	77.6317	-2.04504	64.8655	97.1623	77.225	234.477	237.2	28.6126	49.3923	36.6591	45.317	-2.03559	3.5984e-85
Smp_179570	0.742537	1.01172	-2.21817	0.201201	0.526674	0.375216	1.60371	1.57545	0.112997	2.11482	1.40337	-1.90982	1.44686	2.1446	0.693052	3.94251	4.46524	0.791077	1.28385	0.416828	0.951653	-2.01328	1.07559e-16
Smp_099440	1.27222	2.7858	-1.42433	1.30514	1.16517	0.666664	2.97598	2.56692	0.729913	5.22108	2.92125	-2.05624	3.24573	5.60643	3.2152	11.6109	11.6037	1.70555	3.29749	1.87409	2.08046	-2.00789	9.88772e-32
SmVG_025638:Smp_102210	6.28939	12.183	-2.22395	2.29771	3.25931	4.38175	20.5047	19.1208	1.41303	16.5292	10.3102	-1.99742	10.3693	15.0972	7.04647	31.4229	39.1664	6.42905	10.1559	5.05544	5.7596	-1.99844	3.2318e-28
SmVG_025638:Smp_131580	6.28939	12.183	-2.22395	2.29771	3.25931	4.38175	20.5047	19.1208	1.41303	16.5292	10.3102	-1.99742	10.3693	15.0972	7.04647	31.4229	39.1664	6.42905	10.1559	5.05544	5.7596	-1.99844	3.2318e-28
Smp_199210	4.98056	7.66137	-1.51607	3.25217	4.96038	4.96916	15.1523	9.86419	1.72228	21.2726	12.6293	-1.95441	17.6281	28.9884	13.4688	49.0467	59.8436	8.87148	16.4416	7.43964	9.74423	-1.98908	3.84917e-24
Smp_131020	2.11726	4.74647	-1.86422	1.6751	1.6209	1.61338	6.92997	6.67462	0.880612	17.7534	5.74103	-1.95402	8.7829	19.9151	6.0984	27.9931	27.2127	4.50685	11.4939	3.37377	3.41682	-1.98531	1.95338e-11
Smp_205770	30.7285	43.6192	-2.03575	16.1971	18.0222	13.2871	101.586	74.7356	11.4714	63.5266	32.9023	-1.94329	23.8734	31.7433	19.9989	124.573	123.99	16.3549	34.947	16.8415	18.1533	-1.98474	2.66455e-21
Smp_203030	3.16091	6.08485	-2.85477	2.32764	6.62503	4.47862	38.4093	32.1637	1.0584	4.6799	4.22141	-1.66835	9.06115	17.5231	15.4147	37.1047	38.2216	4.22196	9.01637	7.65329	7.30552	-1.98052	7.99356e-37
Smp_015100	5.39064	9.28678	-0.763986	1.85185	3.152	3.68152	5.48026	5.73331	0.929743	1.76877	1.08824	-1.93111	1.03595	1.4959	1.28388	3.56602	3.30529	0.50309	0.854824	0.675953	0.473168	-1.97614	3.92303e-24
Smp_154760	8.64238	11.5689	-0.653518	4.9648	6.68026	7.81358	11.7432	10.3263	2.49502	18.0694	17.2431	-1.95493	13.961	19.5501	15.2956	54.1351	55.396	6.70097	10.7386	7.90053	9.34904	-1.97418	3.54391e-51
Smp_121920	0.879812	1.51251	-1.40531	0.410454	0.655428	0.473209	1.39297	1.71833	0.207843	0.392468	0.515049	-1.90141	0.492743	0.473826	0.603942	1.53425	1.37422	0.215554	0.270529	0.320813	0.30735	-1.96306	1.25655e-20
Smp_176540	1.20525	2.02387	-0.741201	0.942793	0.85321	0.570475	1.42526	1.16174	0.48026	3.83429	3.09394	-1.91373	2.9197	3.79149	2.26998	8.56219	8.77794	1.42497	2.12446	1.19331	1.53757	-1.95766	1.74159e-52
Smp_144910	12.1367	18.5344	-1.29404	9.48273	10.9496	9.86707	26.0079	22.7612	4.39111	42.4257	39.5419	-1.95436	31.43	51.3249	40.7355	114.837	118.862	13.8482	26.3143	19.3569	22.8247	-1.94414	3.01247e-66
Smp_154680	0.801391	1.67486	-0.927119	1.04962	0.626454	0.68156	1.46287	1.71275	0.574488	0.957645	1.06983	-1.83598	0.798766	1.32296	1.34085	3.75851	3.4992	0.461394	0.745853	0.668855	0.67128	-1.942	1.7334e-24
Smp_149130	2.79174	5.33032	-0.888598	1.5078	1.89791	1.6279	3.30974	3.48802	0.757678	2.63162	2.69756	-1.89129	2.57929	2.78133	2.17121	6.99419	8.46486	1.2519	1.53865	1.13701	1.40108	-1.92805	9.8379e-33
SmVG_025381:Smp_104270	62.5859	137.326	-2.39054	18.7026	39.5688	53.593	206.803	209.554	9.68424	59.216	50.3698	-1.96281	33.9559	57.4631	46.5989	118.45	130.796	16.8959	32.4774	24.9847	25.7013	-1.92364	1.35088e-41
SmVG_025381:Smp_180390	62.5859	137.326	-2.39054	18.7026	39.5688	53.593	206.803	209.554	9.68424	59.216	50.3698	-1.96281	33.9559	57.4631	46.5989	118.45	130.796	16.8959	32.4774	24.9847	25.7013	-1.92364	1.35088e-41
Smp_148670	1.27618	1.01684	-1.38577	0.523908	0.982799	0.405986	1.12805	1.00056	0.289997	1.91873	2.16787	-1.92175	1.16304	2.10969	1.92879	5.61807	5.36323	0.629285	1.1919	1.04427	1.35424	-1.9174	1.0308e-32
Smp_212330	0.275509	1.07924	-1.37836	0.988415	1.25014	1.67433	4.31674	3.79338	0.537633	2.34352	2.02528	-1.8706	7.60782	10.2874	2.35761	12.8026	17.3782	3.70671	6.05742	1.32857	3.21909	-1.89206	6.80937e-09
Smp_010770.2	10.8919	12.9492	-0.767555	6.38839	8.12128	5.87418	11.1174	12.1236	3.16682	10.3898	10.962	-1.83949	10.4748	12.5807	9.28426	28.5334	26.1007	5.05923	6.88976	4.84814	6.24324	-1.89034	2.9249e-52
Smp_194720	0.402217	0.593104	-1.16204	0.402384	0.353057	0.620676	1.53238	1.32222	0.223726	1.3124	1.57188	-1.72405	1.98992	2.89128	1.91999	6.75942	6.66429	1.01248	1.72144	1.12703	1.41636	-1.88826	6.56455e-56
Smp_136710	10.725	18.1835	-0.930935	6.16571	8.38298	5.56476	14.2369	12.6764	3.22128	40.5361	25.5299	-1.92283	24.8222	45.9756	22.6846	77.487	88.374	12.2717	25.8876	12.1685	15.26	-1.88381	7.81109e-29
Smp_123830	6.16737	13.1542	-1.10792	4.64134	5.35427	4.65314	13.0181	12.0735	2.1623	24.907	23.1957	-1.86226	20.5633	28.3956	21.6776	67.0348	67.0486	9.1574	14.5853	10.4316	12.2949	-1.88093	1.67696e-67
Smp_143410	1.33672	1.70133	-1.44244	0.654232	1.17541	0.893562	2.4924	2.15795	0.32019	3.62331	3.05985	-1.92974	4.00084	4.94343	3.4131	11.5347	10.9925	2.00438	2.75238	1.81909	2.09261	-1.87446	3.42722e-67
Smp_155050	3.80595	5.3444	-1.80763	1.20773	1.68084	1.54205	7.20719	6.32035	0.795358	7.81945	6.85461	-1.81183	4.11927	6.5006	3.11366	13.7857	15.3606	2.38903	4.07854	2.28356	3.19744	-1.87395	4.93795e-57
Smp_121190	1.31934	2.27441	-1.16858	0.830623	1.05416	0.812631	1.84302	1.85427	0.438883	8.40239	10.2781	-1.88302	7.15595	8.99915	7.4132	22.5083	24.7065	3.57074	5.16236	4.06362	5.66715	-1.86414	1.92715e-68
Smp_162500	0.565276	0.840854	-1.23789	0.336156	0.505347	1.00608	1.16536	1.59338	0.193696	0.784409	0.54058	-2.26379	1.16812	1.23424	0.911591	3.84157	3.45146	0.606696	0.72406	0.537593	0.564704	-1.86408	6.22983e-24
Smp_211180	7.04126	9.11809	-1.0525	2.86502	6.49927	6.35254	9.09975	8.95907	1.36056	4.31201	4.56838	-1.83629	3.81638	5.52262	5.14232	12.4953	12.4372	1.79932	2.9734	2.60439	2.81191	-1.86381	3.35413e-47
Smp_162770	164.831	343.858	-1.57962	49.2269	114.69	144.153	366.658	364.425	26.8833	86.3082	114.439	-1.71576	36.7931	89.8978	108.293	221.644	228.423	19.0746	52.213	60.438	61.6438	-1.86136	2.35627e-12
Smp_031190	4.93421	7.81802	-0.974217	3.52848	4.22877	4.65325	8.25472	10.3271	1.83439	2.66504	1.91999	-1.72864	2.61662	3.09633	2.48644	6.13636	6.63581	1.30728	1.74145	1.35373	1.46698	-1.8609	7.57103e-23
Smp_065290	4.20426	8.6997	-0.765307	3.358	2.84247	2.45951	5.78766	4.91629	1.82351	9.83358	8.19702	-1.82634	6.91381	9.97881	6.50657	20.889	19.6089	3.57663	5.75902	3.64499	4.34777	-1.86025	2.38829e-52
Smp_171020	5.109	9.22032	-1.13626	2.1268	3.14948	2.40123	8.34289	7.29472	1.2293	17.6411	13.5043	-1.72396	10.9956	17.9157	11.5546	40.0218	42.4558	6.02547	10.9435	6.82827	7.4318	-1.8466	5.1428e-51
Smp_084090	1.89819	3.38144	-0.927361	1.79081	1.61363	1.66753	2.73286	2.67384	0.922379	6.11791	8.11465	-1.85549	6.77538	6.99598	5.62061	18.3013	19.4529	3.32841	3.8789	2.95527	4.85279	-1.84388	1.55064e-51
SmVG_007958:Smp_130120	4.0826	3.28634	-0.617342	1.70048	3.65607	3.80074	3.93782	5.68788	0.877821	3.05329	2.86921	-1.69521	2.70632	3.87513	2.69458	8.84871	8.27846	1.34301	2.20623	1.42457	1.80847	-1.83289	6.50868e-60
SmVG_007958:Smp_130140	4.0826	3.28634	-0.617342	1.70048	3.65607	3.80074	3.93782	5.68788	0.877821	3.05329	2.86921	-1.69521	2.70632	3.87513	2.69458	8.84871	8.27846	1.34301	2.20623	1.42457	1.80847	-1.83289	6.50868e-60
Smp_011680	14.7049	27.6935	-1.92829	10.5406	14.0366	19.7892	59.6366	60.0419	5.32714	46.5509	44.5241	-1.83129	38.8609	66.8525	50.4396	147.482	146.381	19.118	37.5103	26.7911	30.9004	-1.8315	2.08501e-61
Smp_149720	2.59073	4.17157	-1.16661	3.1739	2.03914	1.84359	6.21918	7.21228	1.43366	20.5243	10.3281	-1.45412	16.9425	35.0336	10.0407	51.4847	40.8075	8.5926	19.8331	5.47442	7.91343	-1.8271	2.33329e-12
Smp_127820	12.4264	16.9072	-0.955703	4.63988	9.00207	7.00406	16.7008	17.3211	2.22896	9.06551	8.3549	-1.70109	5.53516	10.7524	8.1413	24.5405	22.4327	3.04326	5.8292	4.92558	4.08636	-1.81209	6.06147e-43
Smp_197450	2.47538	3.21887	-2.14368	0.922008	1.80521	1.4517	7.59877	5.64015	0.508196	4.52337	3.3759	-1.75509	2.83011	4.95976	3.1953	9.05332	10.2138	1.47793	2.86373	1.81072	2.04889	-1.8038	1.31489e-29
Smp_020080	5.4393	12.7524	-1.69704	3.76354	6.27976	10.8172	22.7166	22.2277	1.99939	5.43256	5.46981	-1.82264	5.54257	8.92262	6.4672	19.6802	18.8566	2.82998	5.19977	3.5988	5.09748	-1.80302	1.6224e-43
Smp_149740	3.86027	5.43115	-0.843078	2.26702	2.70989	2.58956	5.1297	4.86565	1.1488	9.18054	8.80194	-1.77038	7.32603	10.3371	7.79205	26.5532	23.3595	3.6168	5.73014	4.06888	5.0087	-1.79606	2.01952e-68
Smp_161220	9.12285	11.0077	-1.71157	5.57255	7.23334	6.6349	21.3143	21.7561	3.13797	8.12781	8.9362	-1.8031	7.31987	9.83552	7.3691	23.9159	22.4606	3.88054	5.88857	4.32105	5.54041	-1.79068	1.97066e-41
Smp_170110	13.1082	20.0846	-1.73747	5.91163	9.68014	8.28777	29.1861	29.1799	3.02612	20.3275	9.59182	-1.78339	11.2431	20.2717	6.04417	24.0441	30.4807	5.77268	11.8022	3.4056	5.10366	-1.78944	1.49166e-10
Smp_146720	3.31935	6.00296	-1.8122	2.02238	2.82381	3.86544	11.9386	11.3077	1.05421	14.6378	10.4117	-1.83701	11.591	18.8322	10.1801	33.1417	36.8073	5.7881	10.6295	5.52558	7.24033	-1.78363	8.36804e-39
Smp_036010	7.75313	12.9482	-2.32549	2.62123	5.62154	6.0033	29.38	24.8775	1.44394	7.95289	7.28889	-1.66895	6.58391	9.81159	10.2252	21.3471	22.4316	3.40633	5.75758	5.74814	5.10096	-1.7798	1.06986e-31
Smp_205400	0.783395	0	-2.09794	0.319783	0.46456	0.693526	2.20372	1.52608	0.199355	1.04578	0.912894	-1.82115	1.04947	1.13798	0.964851	2.54401	3.5771	0.701622	0.835443	0.523983	0.661342	-1.77746	6.70163e-07
SmVG_018887	14.3812	26.7534	-2.2547	3.13147	3.52898	2.20196	48.0146	44.6221	2.62545	183.639	94.5804	-1.88301	34.7164	95.4041	43.7819	330.008	260.92	37.1793	93.2402	50.2475	44.1843	-1.76419	3.04046e-22
Smp_159650	5.61514	9.64068	-1.17349	1.26383	4.90892	6.91509	13.5078	16.3868	1.00398	1.99281	2.58812	-1.40437	1.90243	3.12332	2.84791	9.2222	8.59275	1.35089	2.42101	2.15161	2.25125	-1.76335	2.53599e-29
Smp_165670	3.31273	20.8135	-1.3502	0	3.44662	2.03634	22.2917	24.4666	0	6.38706	7.65132	-2.1612	3.8984	7.24936	0	30.8208	26.2222	3.37435	11.7933	3.04328	2.10862	-1.75231	7.08839e-07
Smp_123860	0.702134	2.91729	-1.54165	0.761865	0.483462	0.387514	2.07107	1.9914	0.430476	5.72473	3.49456	-1.71309	2.54623	5.29257	2.41557	8.0561	8.66477	1.38261	3.0985	1.36488	1.75626	-1.7485	2.68484e-21
Smp_050520	2.47801	4.94067	-1.94972	1.49271	1.87095	2.83949	7.7258	8.50989	0.771419	17.4045	11.4043	-1.68429	10.99	17.8549	7.99352	28.2318	29.0763	5.37211	9.97274	4.18333	5.93911	-1.74554	9.733e-28
Smp_125250	22.5595	48.9058	-1.57345	5.69663	15.0761	18.6654	41.1698	46.5815	2.98649	11.2688	19.4175	-1.8183	8.61729	11.3042	16.1456	34.0729	33.7764	4.46891	6.68103	9.17711	10.292	-1.74243	9.56157e-16
SmVG_031577	11.722	14.8496	-1.20869	5.28666	6.43347	6.89597	13.1611	13.7082	2.84096	32.6174	31.3129	-1.69907	22.0383	27.3556	25.6591	63.2721	65.0923	11.1393	15.829	14.1406	13.9769	-1.73878	1.30466e-60
Smp_098710	14.3818	19.6759	-0.784395	7.76932	10.9032	11.8967	20.1017	20.729	4.00945	28.5879	21.7908	-1.73052	22.084	34.0736	22.1342	64.7085	66.9528	10.8288	19.1391	11.7981	13.4517	-1.73693	1.21149e-58
Smp_132070	8.12301	11.1278	-0.362428	4.73979	5.19804	4.64146	6.38665	6.36879	2.49202	10.171	9.98637	-1.68983	7.21915	10.1949	9.67163	23.6703	24.4076	3.67018	5.86622	5.41114	5.0679	-1.73456	1.30134e-56
Smp_035160	1.93452	3.98528	-0.970774	0.980355	1.55407	1.27354	2.16398	3.20834	0.488654	2.88673	1.10588	-1.87262	1.85471	3.62715	0.806464	4.41529	4.89119	1.01134	2.08332	0.447819	0.698721	-1.73193	5.58783e-09
Smp_102400	22.0764	55.0905	-1.2185	4.85527	12.9028	21.2009	32.7529	40.797	2.60418	13.1915	17.4041	-1.6194	6.1087	11.7473	14.2445	26.6457	27.8703	3.17046	6.88438	8.11244	8.64573	-1.72694	5.36107e-12
SmVG_025646	1.6265	5.39351	-2.22495	0.360264	2.04436	2.66331	12.7391	14.3248	0.255755	1.6804	4.17196	-1.27744	1.43129	3.22125	3.28147	9.85719	7.47118	0.673866	1.95114	2.31628	3.29904	-1.72067	2.26424e-09
Smp_154730	8.80518	11.1983	-0.793999	3.24445	4.48822	3.49627	6.40589	7.08515	1.74997	5.94454	3.81437	-1.71237	3.07718	4.68612	2.05515	7.96196	7.36956	1.6271	2.75562	1.15657	1.65607	-1.72027	5.88793e-16
Smp_141390	13.5242	19.2083	-0.751856	8.76465	9.9933	7.77989	16.106	13.6909	4.6728	23.9181	13.4705	-1.61729	13.627	27.4246	14.7984	39.6426	42.5278	6.76791	15.231	8.4796	8.15442	-1.7195	7.31869e-26
Smp_025830	2.82881	3.45048	-0.723008	2.77244	4.1224	3.54106	5.26649	6.10891	1.37683	1.21416	1.65262	-1.65641	2.661	3.54015	3.29437	7.54295	7.53926	1.24943	1.83964	1.67527	1.84007	-1.71894	3.57295e-46
Smp_128220	1.59365	2.20429	-1.61655	0.971559	1.50469	2.50915	4.91951	5.1626	0.500939	7.61407	5.7737	-1.56445	5.85482	10.1529	5.5534	17.5683	17.5749	2.91816	5.77275	3.03529	3.96805	-1.70719	2.80411e-43
Smp_133690	9.67208	17.2436	-1.05831	3.8428	5.8572	5.55113	12.5204	13.1686	2.14881	12.6414	10.9579	-1.66132	7.45737	11.8295	8.72321	23.2992	22.7541	3.86128	6.87112	4.98608	5.52415	-1.69733	1.90146e-66
Smp_040510	11.8256	11.5708	-1.64659	3.49972	7.23964	6.22023	16.826	17.0255	1.80035	12.4934	14.4762	-1.57863	8.98019	12.1408	10.3179	27.2188	25.6989	4.39151	6.78871	5.49971	7.04596	-1.69527	8.39489e-63
Smp_130050	1.04647	0.503396	-1.62675	0.685268	0.896409	0.79966	1.94485	2.32307	0.367623	3.43734	3.07232	-1.68871	3.3335	3.67231	2.83403	9.75845	7.77368	1.67945	2.11905	1.54778	2.10546	-1.69252	2.38874e-26
SmVG_033761:Smp_139280	1.62093	2.21159	-1.13297	0.571442	0.930279	0.531735	1.99915	1.54277	0.472588	4.92027	2.37559	-1.57286	2.98335	4.59167	2.58457	8.72634	7.52123	1.59879	2.73824	1.55434	1.21323	-1.68921	4.27421e-18
SmVG_033761:Smp_175730	1.62093	2.21159	-1.13297	0.571442	0.930279	0.531735	1.99915	1.54277	0.472588	4.92027	2.37559	-1.57286	2.98335	4.59167	2.58457	8.72634	7.52123	1.59879	2.73824	1.55434	1.21323	-1.68921	4.27421e-18
Smp_163630	3.36836	5.85731	-0.949527	8.08336	6.14324	8.14951	21.2524	10.2486	4.82741	33.7014	26.8841	-1.62033	79.3652	113.799	40.7301	104.659	163.726	44.4966	70.8308	24.2871	46.1168	-1.68829	2.46729e-07
Smp_135420	1.39804	1.23497	-0.865988	0.824523	1.217	0.827031	1.36648	1.36167	0.426375	3.40613	2.90518	-1.79513	2.16335	3.79647	2.61624	7.65963	7.65529	1.07027	2.13127	1.40189	1.77376	-1.67694	3.18687e-43
Smp_213900	7.78263	10.4809	-0.65083	5.87515	7.19175	5.46314	9.58913	8.16199	2.70331	21.3481	18.9495	-1.6964	15.5702	24.9245	19.1703	47.0187	45.6365	6.77996	12.64	8.96636	10.1323	-1.67511	2.02215e-51
Smp_026810	0.427448	0.532343	-2.52099	0.146412	0.402537	0.636465	2.28905	2.11732	0.177305	0.446054	0.388944	-2.59607	0.308547	0.625354	0.370564	2.32778	1.88134	0.336234	0.702365	0.394044	0.553162	-1.6729	1.37609e-27
Smp_074190	0.851897	1.36914	-1.94558	0.64997	0.997729	0.614587	2.18773	2.58359	0.336318	1.24387	1.28049	-2.02062	1.08123	1.63357	1.10409	3.28574	2.86818	0.560968	1.01254	0.587641	0.917698	-1.66822	3.61858e-27
Smp_145510	4.61008	5.24593	-1.89753	1.61086	5.5456	8.29334	17.4623	17.3673	0.830353	2.52875	2.49678	-1.5695	3.69169	5.13887	3.24835	10.9091	10.9213	1.82615	2.9225	1.78907	2.71763	-1.65745	2.66131e-44
Smp_013630	4.6519	7.90899	-0.818235	1.54058	2.61881	1.95547	4.2614	4.28531	0.839754	6.44549	4.59009	-1.66179	3.37895	5.61322	3.77431	10.103	11.1509	1.73817	3.29801	2.09002	2.30461	-1.65284	1.32255e-33
Smp_132610	2.27589	4.54113	-1.44599	0.795943	0.942785	0.476129	3.82714	3.81138	0.685066	12.8627	7.13143	-1.55663	5.00722	9.37024	3.59755	16.3331	16.185	3.03386	6.46824	2.9756	3.19736	-1.64592	2.72542e-21
Smp_166060	1.01867	1.2167	-1.21692	0.44485	0.627401	0.973013	1.58435	1.78843	0.253885	2.12345	0.969837	-1.67575	1.3173	2.24095	0.663112	2.5347	3.03955	0.729498	1.32366	0.36785	0.582679	-1.64103	1.25623e-07
Smp_188700	15.9371	12.939	-1.51204	8.42379	12.7015	10.9769	29.6944	27.0048	4.64397	8.48081	5.74774	-1.61849	7.92292	9.98948	3.89892	15.5277	14.5741	4.14645	5.8957	2.23786	3.24393	-1.64022	1.29396e-09
Smp_043220	100.281	158.828	-1.36305	40.6474	54.2401	52.8764	144.794	140.247	21.5825	328.844	294.825	-1.59954	231.465	276.466	182.102	550.427	579.469	116.824	157.497	99.401	129.117	-1.63775	7.99513e-43
Smp_153990	4.3733	4.10785	-1.28325	3.92602	7.81592	6.13035	13.4001	13.7887	1.79204	11.0583	8.48768	-1.60082	12.9139	22.0018	11.6472	38.1685	32.1491	6.20346	12.1465	6.15875	7.91521	-1.63538	4.5632e-39
Smp_035210	10.7768	17.0746	-0.720291	9.80147	9.62178	7.41044	12.7209	12.8482	5.00218	34.3907	28.4387	-1.63936	29.5277	41.1424	28.0365	77.8041	79.4972	14.659	23.1455	14.9203	18.1922	-1.63345	1.58526e-61
Smp_200060	5.66909	9.18999	-0.798628	1.89384	2.70755	3.89266	11.2326	12.0429	1.96809	4.15957	6.16341	-1.7213	2.05396	3.62607	4.23566	17.1894	17.5898	2.03004	3.0562	4.43366	5.3315	-1.62919	2.33466e-12
SmVG_007629	0.948669	2.39443	-2.10725	0.187186	0.203664	0.666824	3.77403	3.98656	0.341099	0.78462	1.27786	-1.48027	0.50672	0.406656	0.662915	3.05727	2.55381	0.445101	0.456442	0.832874	0.796577	-1.61177	1.28454e-10
Smp_017730	16.6669	33.0612	-1.21944	7.89516	11.0635	13.777	34.4794	30.8461	4.12857	99.8546	80.4739	-1.51767	59.8215	98.5065	65.2998	177.172	175.493	29.8582	55.8752	35.2357	40.7443	-1.60967	1.12449e-44
Smp_137580	2.01883	3.04983	-1.87316	1.08233	2.05889	1.89914	6.21939	6.56696	0.552373	13.8912	8.74157	-1.57887	8.28596	17.8604	8.21352	25.1741	25.4636	4.03987	9.87885	4.32033	5.74665	-1.60911	2.89237e-21
Smp_174690	4.40697	6.19811	-1.21963	2.26229	3.78746	2.9757	6.78679	7.31083	1.28688	11.1539	6.0303	-1.49825	7.32557	11.3951	5.51695	17.9252	18.7285	3.85711	7.01328	3.1857	4.00196	-1.60573	5.45427e-22
Smp_123350	1.3448	1.61176	-1.12433	0.600085	0.805319	0.358364	1.34819	1.32706	0.371878	1.84258	1.49234	-1.75782	1.39351	2.05249	1.25249	3.78731	4.02209	0.776626	1.26738	0.72545	0.944352	-1.58999	5.41404e-19
Smp_077610	23.3499	49.3095	-1.8846	6.4887	14.9759	21.4944	64.2025	70.802	3.61542	21.3391	24.9822	-1.54589	11.8652	22.7209	21.2606	42.6461	46.0733	6.2245	13.5817	12.4979	14.6253	-1.58087	1.79479e-14
Smp_212450	6.9825	12.7351	-1.0217	5.72629	8.15594	10.8901	14.3546	17.6587	3.42318	18.1949	23.3122	-1.56379	23.9988	33.608	28.3221	78.4102	83.6629	14.1517	21.2687	16.1206	21.9415	-1.58082	2.42042e-47
Smp_020340	0.665495	1.04787	-0.912904	0.514491	0.540756	0.882997	1.46246	1.18638	0.317976	2.17919	1.46517	-1.53491	1.66421	2.85294	2.06402	5.44874	5.35932	0.940497	1.7781	1.21386	1.15848	-1.57738	2.87513e-35
Smp_129060	4.22435	6.39135	-0.660266	2.43557	2.69889	1.9185	4.32542	3.67357	1.33968	9.07401	9.44423	-1.53746	6.57206	9.12706	7.92827	19.7878	18.3329	3.39574	5.34561	4.33338	5.15769	-1.56798	3.73825e-65
Smp_103610	239.194	568.667	-1.97987	129.675	304.562	621.246	1806.78	1799.64	75.1898	190.004	282.027	-1.45468	165.681	333.894	560.604	981.592	1113.37	91.9815	211.721	338.337	280.901	-1.56236	2.71221e-07
Smp_156910	21.4723	28.7571	-1.39406	9.1299	14.6124	10.8326	35.3533	30.9654	4.98333	66.3725	42.5297	-1.46825	39.7588	69.1782	32.3166	102.778	101.857	20.6767	40.3143	18.4377	23.6371	-1.56233	9.834e-21
Smp_170820	2.87443	3.03941	-1.37262	1.8697	3.03289	2.1087	6.50123	4.60166	0.896509	9.00087	5.07714	-1.60696	6.88901	13.4098	6.46329	18.7407	18.6296	3.31547	7.25827	3.32354	3.75219	-1.56058	1.00818e-20
SmVG_011530	3.96994	2.69634	-1.26418	1.00918	2.49414	3.08095	4.21214	5.87314	0.508192	5.12219	7.69083	-1.6427	4.13482	5.05453	5.42336	18.7567	11.7244	2.07745	2.89211	2.99505	3.97504	-1.55761	9.56758e-15
SmVG_023508:Smp_011990	10.9567	17.0366	-1.83252	5.98837	9.7516	10.0155	36.1282	32.7968	3.12772	15.7245	11.1921	-1.52662	16.0697	20.284	17.2273	38.3511	43.1495	8.04932	11.4418	9.34386	7.74914	-1.55728	2.25747e-28
SmVG_023508:Smp_177540	10.9567	17.0366	-1.83252	5.98837	9.7516	10.0155	36.1282	32.7968	3.12772	15.7245	11.1921	-1.52662	16.0697	20.284	17.2273	38.3511	43.1495	8.04932	11.4418	9.34386	7.74914	-1.55728	2.25747e-28
Smp_160240	1.66331	1.50479	-0.842177	1.50328	1.66897	1.59137	3.04862	2.49276	0.791866	2.16646	2.27423	-1.71707	3.90483	3.77227	2.00118	6.46215	6.24026	1.89985	2.13066	1.07058	1.8046	-1.53312	5.26925e-14
Smp_081430	6.35022	10.123	-1.47065	4.75493	4.75184	3.97084	11.9264	8.46461	2.52179	41.5405	24.2204	-1.60995	33.043	43.7937	22.1235	64.2893	66.6611	16.7318	25.027	12.1031	15.3034	-1.53072	1.46693e-19
Smp_131470	2.70966	4.72032	-1.61743	0.389098	1.93992	2.97973	5.97837	7.78182	0.267388	1.53762	2.33647	-1.33207	1.56825	2.14321	2.22595	4.69704	5.26535	0.880863	1.44914	1.18119	1.6443	-1.52492	2.28196e-17
SmVG_014788	45.2399	43.975	-0.621749	18.9823	30.1534	25.4593	65.5518	90.9291	16.0927	27.6683	22.1082	-1.11437	13.4864	27.6519	11.3379	57.5985	56.5592	10.9763	24.0616	9.51447	12.9152	-1.52283	4.06474e-17
Smp_156770	21.3661	34.7091	-1.04885	12.4007	17.0516	15.4326	35.5231	32.0132	6.23149	142.172	77.57	-1.46262	91.3687	167.613	67.9384	200.955	234.187	44.3039	93.5895	35.6129	45.4396	-1.51629	6.64723e-14
Smp_129380	1.40142	2.1299	-0.743336	0.858714	1.06567	0.789208	1.47351	1.63091	0.448718	1.78632	1.4191	-1.61762	1.11952	1.81343	1.05988	3.13088	2.83907	0.573275	1.03864	0.574995	0.76126	-1.51479	3.17999e-24
Smp_028490	6.1663	7.35718	-1.15039	5.76917	10.3219	5.78559	11.1315	12.254	3.03065	6.77992	4.38579	-1.75	7.57203	15.9044	9.88436	23.6977	24.1726	3.7899	9.05352	5.46571	5.31501	-1.51255	9.99924e-24
Smp_161250	7.3821	10	-1.23231	3.00655	4.79061	4.74157	11.5289	10.6242	1.56171	17.7633	16.0151	-1.38092	11.9974	16.7339	10.0774	30.0293	28.0792	5.9475	9.42678	5.43114	7.57094	-1.51232	6.56579e-48
Smp_207040	0.988582	1.75761	-2.026	0.202849	0.871951	1.2131	2.86979	2.77826	0.139847	1.01833	0.892682	-1.89006	0.856915	1.35173	0.915471	2.52281	2.58507	0.431229	0.834995	0.534415	0.664029	-1.51155	3.69804e-20
Smp_060570	37.1599	41.1988	-0.488998	12.6798	22.0521	15.8216	22.5939	25.0782	6.85535	23.1492	16.765	-1.54343	14.0632	21.4682	14.4455	36.0302	34.8654	7.17504	12.2825	7.94348	8.23272	-1.50985	3.5392e-43
Smp_179660	10.7364	19.7422	-0.964274	3.32625	6.54201	5.18957	11.868	11.6522	1.72423	13.7211	9.72499	-1.49067	6.30309	12.5193	8.69917	18.0925	18.5204	3.08914	7.00291	4.66322	4.62641	-1.4972	1.64278e-29
SmVG_029660	1.18757	1.49602	-1.15064	0.46976	0.737179	0.610522	1.37644	1.70074	0.341409	2.88766	2.15004	-1.50761	1.72785	2.74764	1.82187	3.70559	4.70827	1.0185	1.68049	1.18939	0.981253	-1.49699	2.28292e-09
Smp_180500	0.699033	1.01923	-1.04131	0.441293	0.810992	0.754692	1.29707	1.2697	0.209254	0.48468	0.495781	-1.56969	0.552339	0.887586	0.760136	1.46222	1.48602	0.270955	0.45524	0.409083	0.34061	-1.49604	4.59605e-20
Smp_064750	8.56213	7.70927	-0.449611	2.83857	5.896	4.90508	5.43696	6.32223	1.48607	8.42382	7.35261	-1.46111	5.63251	8.6656	5.33758	15.7876	13.3801	2.82569	4.91161	2.86835	3.94244	-1.49505	1.1569e-49
Smp_153000	1.84504	2.27822	-1.18325	1.24301	1.62479	1.89905	3.3232	3.22304	0.67435	17.7788	16.8277	-1.56345	14.0217	23.607	15.8648	41.8808	38.8513	6.93241	13.1152	8.35356	11.2313	-1.49368	3.12516e-49
SmVG_022378:Smp_126470	14.1076	15.4742	-0.378246	11.8181	13.2678	8.60817	16.7601	15.3706	6.47964	38.1523	37.899	-1.39522	38.1289	53.7036	32.7406	90.8277	96.9136	19.6598	30.9537	18.4881	25.9079	-1.49137	1.98465e-43
SmVG_022378:Smp_126480	14.1076	15.4742	-0.378246	11.8181	13.2678	8.60817	16.7601	15.3706	6.47964	38.1523	37.899	-1.39522	38.1289	53.7036	32.7406	90.8277	96.9136	19.6598	30.9537	18.4881	25.9079	-1.49137	1.98465e-43
Smp_198050	2.99529	2.97436	-0.977343	1.53427	2.47302	2.86166	4.12743	3.2578	0.837378	3.8864	4.64369	-1.47869	4.03219	4.10739	2.44412	7.18843	7.61978	1.99834	2.52038	1.29399	2.70313	-1.4811	1.29482e-13
SmVG_018669:Smp_168500	4.58278	6.48592	-0.820952	4.20704	5.41776	3.89074	6.57379	6.06367	2.24339	6.74698	4.21922	-1.59266	5.49155	8.68181	4.2458	11.3922	11.7347	2.8439	5.04456	2.40045	3.1499	-1.47947	4.71295e-16
SmVG_018669:Smp_198230	4.58278	6.48592	-0.820952	4.20704	5.41776	3.89074	6.57379	6.06367	2.24339	6.74698	4.21922	-1.59266	5.49155	8.68181	4.2458	11.3922	11.7347	2.8439	5.04456	2.40045	3.1499	-1.47947	4.71295e-16
Smp_141680	10.4076	16.8881	-1.42961	5.00433	6.66692	7.42922	19.3077	17.6577	2.62641	43.6466	29.3089	-1.4367	26.396	43.3897	24.0254	58.2942	65.6235	13.2498	24.7308	13.0105	14.649	-1.47569	2.17714e-25
Smp_175980	7.32421	10.8332	-0.603164	4.24264	4.72091	4.32086	6.1257	6.52897	2.18392	4.91865	3.75708	-1.43486	2.76176	4.50361	3.40132	7.21906	7.60601	1.38871	2.55071	1.85196	1.78589	-1.47094	1.39334e-31
Smp_062560	1.97553	3.59214	-0.638621	1.21134	1.2169	0.664364	1.88097	1.73699	0.655946	4.95479	4.93493	-1.34845	3.13773	5.10417	4.78974	10.1412	9.22637	1.6282	2.97295	2.71225	2.49895	-1.46843	1.50408e-23
Smp_142620	1.67765	2.1943	-0.861588	0.732087	1.19638	0.858476	1.86699	1.77882	0.361328	4.98278	4.06058	-1.46949	2.89838	4.79256	2.44102	7.42145	6.80409	1.44827	2.7079	1.31044	2.05203	-1.46452	1.35228e-28
Smp_141030	0.201023	2.61739	-2.24765	0.71106	0.413011	1.38934	6.05239	6.03733	0.467822	4.64907	3.65156	-1.32414	6.57905	11.4115	4.28724	15.0272	18.8911	4.4747	7.73558	2.71026	4.16725	-1.45669	1.60578e-10
Smp_150340	7.12782	9.08845	-0.609554	1.96637	4.34508	4.01043	5.29626	5.43623	1.02105	5.55675	6.89317	-1.43379	4.1159	5.0224	3.91212	10.1655	9.18282	2.04451	2.84459	2.12545	3.13793	-1.45416	6.84136e-46
Smp_180240	3.54454	7.01017	-0.557771	2.93587	3.03262	2.11803	4.50582	4.50881	1.50564	20.7694	16.9629	-1.43411	18.7274	25.8328	16.0335	39.5694	39.3121	9.18363	14.3884	8.50156	10.9399	-1.45329	2.14684e-39
Smp_165440	3.88532	5.044	-0.903986	2.06708	3.36883	2.58855	4.92505	5.94287	1.03988	6.10164	6.12778	-1.40619	5.18045	8.20915	7.5188	16.4165	14.1589	2.5073	4.54052	3.93982	3.95149	-1.45288	9.0608e-37
Smp_138200	2.43152	2.42094	-0.823917	0.484767	1.55915	1.48304	1.99105	2.27501	0.243244	2.29986	2.40911	-1.39975	1.30792	2.09032	1.59214	4.0338	3.26692	0.660084	1.17714	0.862272	1.22242	-1.44936	1.06304e-19
Smp_079010	39.7869	48.5283	-0.685555	15.2583	22.405	15.2486	28.3135	29.6861	8.28479	44.8787	30.7278	-1.39149	26.0518	38.4914	24.6914	59.0323	57.1646	13.3785	22.1647	13.6976	14.2187	-1.44303	3.41504e-33
Smp_136180	2.63968	2.91199	-1.31273	0.998413	2.09808	1.7061	3.60376	3.73912	0.526381	3.18161	2.31395	-1.36669	2.39931	3.79841	1.75974	4.69112	4.82694	1.12395	2.12451	0.829828	1.29671	-1.44069	2.0468e-15
Smp_163970	11.2241	13.3149	-0.696585	5.30013	8.58383	8.97527	12.49	13.9508	2.76689	10.7651	9.88477	-1.47198	7.92299	11.7313	9.76035	19.6865	20.0884	3.95144	6.65504	5.32008	5.83957	-1.43969	3.93783e-47
SmVG_020579:Smp_149460	1.84796	2.37491	-0.999421	0.616965	1.09773	1.12078	2.20478	2.07422	0.368725	4.96304	4.93292	-1.39935	3.52405	4.61335	2.4888	9.28864	7.6503	1.93121	2.75896	1.41178	2.53483	-1.438	8.50747e-26
SmVG_020579:Smp_149470	1.84796	2.37491	-0.999421	0.616965	1.09773	1.12078	2.20478	2.07422	0.368725	4.96304	4.93292	-1.39935	3.52405	4.61335	2.4888	9.28864	7.6503	1.93121	2.75896	1.41178	2.53483	-1.438	8.50747e-26
Smp_170870	5.76796	8.2894	-0.694431	2.42123	3.70768	4.01205	5.92558	6.00113	1.2832	6.75377	4.93663	-1.36595	4.90488	7.1376	4.6699	10.4712	10.587	2.49043	4.10438	2.55019	2.79653	-1.43516	1.14865e-33
Smp_160210	1.41554	1.79601	-1.06642	0.239319	1.19024	0.710753	1.056	1.09988	0.124382	1.04541	0.788345	-1.40939	0.301242	0.973319	0.560331	1.34556	1.21633	0.170298	0.52626	0.341192	0.456627	-1.43308	5.41961e-11
SmVG_030124:Smp_078060	2.33054	3.0479	-0.525536	0.919722	1.51756	1.31628	2.11993	1.72322	0.498685	5.67186	5.65695	-1.40017	3.68121	5.55753	3.13185	8.79827	8.80151	1.87097	3.18572	1.74825	2.72994	-1.43036	3.57084e-32
SmVG_030124:Smp_078070	2.33054	3.0479	-0.525536	0.919722	1.51756	1.31628	2.11993	1.72322	0.498685	5.67186	5.65695	-1.40017	3.68121	5.55753	3.13185	8.79827	8.80151	1.87097	3.18572	1.74825	2.72994	-1.43036	3.57084e-32
SmVG_030124:Smp_164260	2.33054	3.0479	-0.525536	0.919722	1.51756	1.31628	2.11993	1.72322	0.498685	5.67186	5.65695	-1.40017	3.68121	5.55753	3.13185	8.79827	8.80151	1.87097	3.18572	1.74825	2.72994	-1.43036	3.57084e-32
Smp_194650	3.5655	4.68622	-1.11835	1.38531	2.28208	2.10367	4.48086	4.45238	0.707446	7.77869	3.93585	-1.40298	3.40272	7.70811	2.602	8.13243	7.94115	1.64417	4.31179	1.40387	1.99894	-1.42676	3.52448e-09
SmVG_000886	2.56152	3.10617	-1.59068	0.214912	0.561887	0.419513	3.28683	2.87656	0.181338	7.44212	8.84765	-1.33711	2.64481	4.39748	4.58448	14.8036	12.5187	1.91417	3.61971	3.40901	3.83057	-1.42592	9.37823e-10
Smp_076320	5.51756	7.28074	-2.11075	2.74789	4.19326	2.27793	12.2832	21.0015	1.39014	0.977122	1.15712	-1.48793	0.930588	1.07579	0.295973	2.14192	2.00655	0.449167	0.593039	0.158191	0.713298	-1.42151	6.9063e-07
SmVG_025004	0.629936	1.59201	-1.47985	0.210676	0.642728	1.23343	2.17852	1.79258	0.0938339	7.83837	5.01757	-1.45672	5.83075	11.0524	3.54109	8.77977	12.4338	2.78978	6.08394	1.71724	3.25421	-1.4207	7.75668e-06
SmVG_022083:Smp_127790	0.895728	1.76159	-0.80212	0.425791	0.520829	0.475451	1.16452	1.15697	0.23836	1.44112	1.25335	-1.35595	1.03859	1.36515	0.604848	2.26049	1.92679	0.51306	0.797827	0.474176	0.62341	-1.41971	1.57566e-18
SmVG_022083:Smp_127800	0.895728	1.76159	-0.80212	0.425791	0.520829	0.475451	1.16452	1.15697	0.23836	1.44112	1.25335	-1.35595	1.03859	1.36515	0.604848	2.26049	1.92679	0.51306	0.797827	0.474176	0.62341	-1.41971	1.57566e-18
Smp_147050	21.1734	31.4796	-1.33532	9.71919	15.6346	13.8724	37.4614	33.4502	4.99595	23.5276	18.3948	-1.37061	17.9791	29.1009	20.8063	47.8698	48.1438	9.44427	16.5791	11.5873	13.6694	-1.41434	4.59512e-53
Smp_152050	22.7904	47.8138	-1.24602	9.03	20.303	23.8697	51.6784	49.2142	4.76056	15.7905	17.4022	-1.50909	8.44094	21.5013	22.7157	38.3399	37.4473	4.27776	12.4418	12.5391	12.8538	-1.41304	4.02829e-10
Smp_156230	38.1895	51.3854	-0.849728	21.012	26.2553	23.8284	37.2846	39.4207	11.7196	127.389	137.47	-1.37614	117.073	124.729	130.196	280.937	266.671	63.1294	76.0568	78.8363	75.4355	-1.40743	4.69789e-24
Smp_140610	61.7024	124.971	-1.66128	32.9212	57.1381	85.4617	212.907	239.227	17.1189	60.0344	64.9766	-1.23434	64.8997	90.0092	85.762	154.775	164.184	31.9925	50.4666	45.8205	47.4344	-1.40673	3.83303e-30
SmVG_007665:Smp_139900	4.50157	4.83668	-0.674651	1.89111	3.01761	2.39089	3.84972	4.7164	1.07688	3.81297	2.84086	-1.34937	2.25158	3.87655	2.58923	5.69352	5.06679	1.14704	2.28104	1.47718	1.47569	-1.39463	2.93187e-22
SmVG_007665:Smp_210240	4.50157	4.83668	-0.674651	1.89111	3.01761	2.39089	3.84972	4.7164	1.07688	3.81297	2.84086	-1.34937	2.25158	3.87655	2.58923	5.69352	5.06679	1.14704	2.28104	1.47718	1.47569	-1.39463	2.93187e-22
Smp_180810	4.68252	7.33904	-1.27906	2.52966	3.06465	4.18327	8.42186	8.13034	1.28576	18.4355	13.2536	-1.38959	12.2384	17.7172	11.1748	25.2193	27.6526	5.95037	9.83842	5.92771	6.61054	-1.39456	2.40714e-31
SmVG_008860:Smp_134620	5.74299	8.47212	-1.91585	1.79006	3.43615	2.18814	10.6946	9.638	0.930036	9.629	6.78615	-1.28343	4.63631	8.8187	5.457	12.261	13.79	2.34907	4.99326	3.03366	3.23288	-1.39432	4.21008e-23
SmVG_008860:Smp_169100	5.74299	8.47212	-1.91585	1.79006	3.43615	2.18814	10.6946	9.638	0.930036	9.629	6.78615	-1.28343	4.63631	8.8187	5.457	12.261	13.79	2.34907	4.99326	3.03366	3.23288	-1.39432	4.21008e-23
Smp_144960	2.38779	2.86698	-1.40184	0.734071	1.32461	0.995021	2.84455	3.1742	0.394297	1.95523	1.13049	-1.31498	1.54603	1.7696	0.883827	2.35407	2.56654	0.78326	1.01371	0.484399	0.520731	-1.39364	7.58738e-10
Smp_007780	1.15776	1.8373	-1.31537	0.430625	0.953686	0.898995	1.8997	1.9036	0.215049	1.82338	1.76106	-1.44757	0.956053	2.18522	1.24101	2.5826	2.4857	0.459401	1.19575	0.640769	0.91652	-1.38729	1.05344e-07
Smp_134210	2.60679	3.23871	-1.06409	1.4149	1.67825	1.45565	3.07153	3.34891	0.734432	13.4319	5.28474	-1.31738	6.80911	13.0007	5.73994	14.966	15.4039	3.40152	7.33832	3.16306	2.81644	-1.38683	1.70662e-10
Smp_130100	215.582	477.33	-1.99734	117.536	201.703	221.966	550.841	602.6	61.2776	167.693	189.861	-1.44726	131.266	209.337	236.737	375.896	384.134	65.4324	118.713	126.738	128.441	-1.38619	7.65653e-14
SmVG_029474	13.4279	21.8211	-0.993271	6.38719	10.1663	10.5359	17.33	19.1669	3.00544	10.5524	9.58134	-1.39659	9.03806	11.7489	5.89794	13.9867	15.263	4.08372	6.1578	2.92062	4.88553	-1.38508	5.67851e-13
Smp_171990	4.86301	4.97003	-1.4398	1.10148	3.36108	4.17446	5.72724	5.58065	0.51774	5.49502	3.09294	-1.4427	4.04859	6.09637	2.49186	6.21495	6.76678	1.80497	3.23037	1.33011	1.7587	-1.38401	1.0907e-08
Smp_159740	3.36757	6.15479	-0.683254	1.86222	1.95815	1.32561	4.13033	2.96981	0.959614	11.4134	6.82762	-1.25267	7.35734	11.9822	6.22962	15.3825	14.5299	3.62326	6.76731	3.3181	3.52695	-1.38243	1.49834e-17
SmVG_024080:Smp_167820	9.50822	10.5095	-0.716428	3.36822	6.35639	4.42866	7.37754	8.42655	1.73816	5.42025	5.54601	-1.34771	3.86108	5.24254	4.10839	9.09101	8.93056	1.86691	2.93172	2.22385	2.76549	-1.37789	3.56439e-41
SmVG_024080:Smp_198430	9.50822	10.5095	-0.716428	3.36822	6.35639	4.42866	7.37754	8.42655	1.73816	5.42025	5.54601	-1.34771	3.86108	5.24254	4.10839	9.09101	8.93056	1.86691	2.93172	2.22385	2.76549	-1.37789	3.56439e-41
Smp_104970	4.37914	6.60191	-1.02307	1.38375	2.76264	2.39236	5.08102	6.0646	0.754072	1.55957	0.906406	-1.33948	0.759214	1.46099	1.12093	1.84962	2.19254	0.3756	0.823075	0.602119	0.437421	-1.37434	8.33253e-11
Smp_070240	1.0981	2.58449	-1.68258	3.05447	2.57066	2.83376	8.7363	4.18524	1.66614	28.6778	15.187	-1.43216	38.1025	58.1013	14.4336	35.395	55.0924	19.5571	33.6668	8.21998	20.5624	-1.36393	0.000310945
Smp_157540	6.45412	6.89843	-0.489625	3.39075	5.25529	4.56898	5.94413	6.31019	1.67103	10.3315	9.04698	-1.40219	9.25674	11.7264	6.67599	17.868	18.1276	4.52272	6.53514	3.53856	5.33588	-1.36312	4.3324e-30
Smp_168950	2.14641	2.45777	-1.06548	1.33519	1.7259	1.88385	3.44938	2.55105	0.669151	3.13253	2.6981	-1.43953	3.29184	3.70246	2.108	4.25866	5.13997	1.61945	2.0997	1.07471	1.77831	-1.36172	2.24734e-08
Smp_086530	82	148.563	-1.39004	32.4531	43.9511	34.3492	127.273	140.135	17.9895	475.47	454.6	-1.31077	243.323	388.457	338.805	674.439	716.222	127.436	229.211	196.125	202.81	-1.35594	1.27555e-29
Smp_145130	1.14106	1.72731	-1.62983	0.496764	0.844854	0.782522	1.83262	1.44392	0.312816	1.84149	1.39679	-1.88809	1.46263	1.92584	0.908455	3.10244	3.40112	0.935135	1.4363	0.668941	1.04327	-1.35304	1.85359e-12
SmVG_028751:Smp_163500	1.99702	1.61069	-1.0915	0.589997	1.31482	0.971089	1.76911	2.07621	0.309753	3.20831	2.46215	-1.31346	2.11309	3.17846	1.90295	4.29892	4.40745	1.0626	1.82686	1.07695	1.30528	-1.35242	1.28867e-25
SmVG_028751:Smp_163510	1.99702	1.61069	-1.0915	0.589997	1.31482	0.971089	1.76911	2.07621	0.309753	3.20831	2.46215	-1.31346	2.11309	3.17846	1.90295	4.29892	4.40745	1.0626	1.82686	1.07695	1.30528	-1.35242	1.28867e-25
SmVG_028751:Smp_163530	1.99702	1.61069	-1.0915	0.589997	1.31482	0.971089	1.76911	2.07621	0.309753	3.20831	2.46215	-1.31346	2.11309	3.17846	1.90295	4.29892	4.40745	1.0626	1.82686	1.07695	1.30528	-1.35242	1.28867e-25
SmVG_011546:Smp_018670	4.94658	6.9619	-1.15123	2.26773	3.24384	3.21688	7.04524	6.68755	1.16067	9.9424	7.76596	-1.27582	7.23911	9.8503	6.39253	14.5921	13.5697	3.57504	5.54704	3.40782	3.92289	-1.35219	1.3088e-34
SmVG_011546:Smp_132370	4.94658	6.9619	-1.15123	2.26773	3.24384	3.21688	7.04524	6.68755	1.16067	9.9424	7.76596	-1.27582	7.23911	9.8503	6.39253	14.5921	13.5697	3.57504	5.54704	3.40782	3.92289	-1.35219	1.3088e-34
SmVG_011546:Smp_132390	4.94658	6.9619	-1.15123	2.26773	3.24384	3.21688	7.04524	6.68755	1.16067	9.9424	7.76596	-1.27582	7.23911	9.8503	6.39253	14.5921	13.5697	3.57504	5.54704	3.40782	3.92289	-1.35219	1.3088e-34
Smp_084010	6.41174	9.47397	-0.941254	2.70168	4.27965	2.71014	5.77387	6.13827	1.39607	11.6163	9.30897	-1.30657	7.14488	10.8123	8.03028	16.088	15.7702	3.55826	6.1375	4.38872	4.59549	-1.35108	1.42252e-34
SmVG_024145:Smp_161070	2.63734	3.59967	-1.24518	1.33118	2.07749	1.36163	4.45814	4.47875	0.670545	3.16626	2.83557	-1.27381	2.22476	3.90913	2.21076	5.13133	5.32208	1.08747	2.24238	1.15162	1.58098	-1.34903	1.41407e-18
SmVG_024145:Smp_174550	2.63734	3.59967	-1.24518	1.33118	2.07749	1.36163	4.45814	4.47875	0.670545	3.16626	2.83557	-1.27381	2.22476	3.90913	2.21076	5.13133	5.32208	1.08747	2.24238	1.15162	1.58098	-1.34903	1.41407e-18
SmVG_032735:Smp_039160	5.66553	5.767	-0.849835	2.2827	4.50463	3.44651	5.26083	6.71575	1.26802	5.47442	4.16284	-1.28466	4.66522	6.29544	3.31683	8.989	9.04829	2.43126	3.73126	1.90295	2.66996	-1.34496	7.96625e-18
SmVG_032735:Smp_143420	5.66553	5.767	-0.849835	2.2827	4.50463	3.44651	5.26083	6.71575	1.26802	5.47442	4.16284	-1.28466	4.66522	6.29544	3.31683	8.989	9.04829	2.43126	3.73126	1.90295	2.66996	-1.34496	7.96625e-18
SmVG_032735:Smp_189450	5.66553	5.767	-0.849835	2.2827	4.50463	3.44651	5.26083	6.71575	1.26802	5.47442	4.16284	-1.28466	4.66522	6.29544	3.31683	8.989	9.04829	2.43126	3.73126	1.90295	2.66996	-1.34496	7.96625e-18
SmVG_007996:Smp_148420	2.84197	3.95262	-0.677917	1.45374	1.92372	1.64454	2.50503	3.05581	0.766174	2.69653	2.89506	-1.2671	2.19216	2.84468	2.1854	4.51686	5.05056	1.10401	1.63435	1.19399	1.51076	-1.34172	6.40774e-28
SmVG_007996:Smp_148430	2.84197	3.95262	-0.677917	1.45374	1.92372	1.64454	2.50503	3.05581	0.766174	2.69653	2.89506	-1.2671	2.19216	2.84468	2.1854	4.51686	5.05056	1.10401	1.63435	1.19399	1.51076	-1.34172	6.40774e-28
Smp_212010	1.85657	0.77417	-1.34321	0.994401	2.10598	2.02656	4.63173	4.05799	0.649941	2.50317	2.56269	-1.22111	3.02571	3.49738	1.1016	4.1597	5.61312	1.50644	2.26161	0.756889	2.02412	-1.3389	7.40219e-07
Smp_197760	3.04325	3.99135	-1.59643	1.06489	1.90195	1.31281	4.34597	5.11013	0.608538	4.13847	2.03018	-1.35296	2.75944	4.16222	0.786271	3.30114	4.92918	1.4816	2.49721	0.465496	1.13688	-1.33721	0.000186151
Smp_015630	2.40923	5.10591	-0.702814	1.41125	1.45195	1.02589	2.63215	2.40622	0.811969	9.65383	6.89345	-1.33012	5.35999	8.0797	4.26528	12.5073	10.6306	2.79747	4.85639	2.41543	3.3161	-1.33717	2.67655e-23
Smp_166890	4.44318	7.49157	-1.13555	1.59302	2.52183	1.76296	5.60133	4.64642	0.838488	20.9308	13.8967	-1.29075	10.8024	18.7991	8.08399	22.9878	21.9655	5.50842	10.8653	4.45368	6.47032	-1.33703	1.177e-15
Smp_071610	64.229	98.2584	-1.67427	37.0449	60.5652	70.3178	163.664	176.279	17.6478	51.0805	48.636	-1.37277	55.6824	73.0905	63.3285	118.119	124.443	26.1907	39.6274	31.9692	34.4056	-1.33195	3.38047e-34
Smp_204390	3.45349	3.00039	-0.898504	1.32839	2.11451	0.777404	2.45185	2.36871	0.725429	2.77296	1.8946	-1.29674	1.2491	2.31122	1.36621	2.929	3.33228	0.63366	1.31425	0.726758	0.83485	-1.3312	1.51597e-16
Smp_044060	1.20256	1.33472	-0.885758	0.62582	0.842636	0.912952	1.31099	1.91518	0.334541	2.72005	3.30485	-1.22983	2.76413	3.07223	2.74669	5.37738	5.5962	1.43331	1.77554	1.52556	1.80806	-1.32827	2.53909e-21
Smp_173030	1.8754	3.75325	-0.968081	1.35367	1.44671	0.972411	3.5794	3.09916	0.740885	7.8356	4.18893	-1.43401	5.61752	9.36636	4.28453	11.3118	12.236	2.91856	5.54759	2.41434	3.02128	-1.32614	2.50384e-10
Smp_157670	10.0022	16.5889	-0.357195	6.52901	6.10861	5.99327	8.68756	8.99766	3.53666	34.9651	38.0121	-1.24551	27.7849	33.2442	25.769	61.2807	62.2468	14.2107	19.2656	14.3975	18.9968	-1.32607	2.61272e-46
Smp_149240	1.58689	1.84033	-1.31924	0.790037	1.17071	1.0009	2.33147	2.49767	0.461336	3.43946	2.06016	-1.3697	2.43289	4.011	2.37649	5.42917	4.70363	1.16317	2.17666	1.04728	1.40823	-1.3235	6.35052e-17
Smp_170550	20.4689	39.2251	-2.00663	16.9501	24.9923	27.2583	98.9131	87.2917	8.95315	59.4441	30.1049	-1.44087	60.1496	107.099	53.007	124.482	128.076	30.0765	60.6316	28.7432	30.2153	-1.31992	1.78787e-14
Smp_153480	25.5498	41.3273	-1.5648	6.77709	15.6041	14.6547	42.3517	35.9429	3.50475	57.0244	41.994	-1.21987	29.6434	56.1392	31.1356	69.7745	74.2593	14.7399	31.6701	16.7341	20.5378	-1.31946	4.31508e-23
Smp_127460	3.3126	4.0501	-1.40326	1.45579	3.33409	3.801	8.00245	9.19191	0.957427	3.29771	4.21258	-1.39357	4.15426	5.49292	4.74076	11.7151	11.2178	2.16673	3.41501	2.72387	4.18819	-1.31908	6.88085e-22
Smp_160740	16.7521	17.9826	-1.63309	6.30296	13.9681	12.6434	33.8903	36.8141	3.36339	22.0536	17.4194	-1.47631	18.8808	30.8777	18.2046	47.048	42.7999	9.64583	17.8184	10.0247	14.0551	-1.31188	8.16261e-37
Smp_143690	15.6791	21.6452	-0.933161	5.6409	9.98116	6.80177	15.1082	17.7234	2.67218	23.4416	14.4258	-1.19801	14.2017	22.6044	11.5091	25.4181	26.3574	7.00675	12.5062	5.76511	6.80593	-1.30797	3.19603e-15
SmVG_024781:Smp_043390	4.20072	8.34762	-2.26379	1.27977	2.76448	4.9761	16.0033	15.9722	0.665192	4.72589	5.57319	-1.26137	3.69738	5.42279	5.11254	9.63287	10.2455	1.82788	3.06343	2.74704	3.27545	-1.30558	4.19713e-27
SmVG_024781:Smp_145550	4.20072	8.34762	-2.26379	1.27977	2.76448	4.9761	16.0033	15.9722	0.665192	4.72589	5.57319	-1.26137	3.69738	5.42279	5.11254	9.63287	10.2455	1.82788	3.06343	2.74704	3.27545	-1.30558	4.19713e-27
SmVG_024781:Smp_145560	4.20072	8.34762	-2.26379	1.27977	2.76448	4.9761	16.0033	15.9722	0.665192	4.72589	5.57319	-1.26137	3.69738	5.42279	5.11254	9.63287	10.2455	1.82788	3.06343	2.74704	3.27545	-1.30558	4.19713e-27
Smp_094890	1.59821	2.15282	-0.64466	0.597301	1.02757	0.821636	1.24305	1.30109	0.321694	2.1906	2.17762	-1.34144	1.97083	2.28925	1.35277	3.38159	3.88073	0.978752	1.32674	0.728481	1.2124	-1.30065	4.53019e-18
Smp_062070	109.563	114.304	-0.510342	55.9155	106.473	66.5792	82.8062	117.743	28.3753	15.3922	11.0164	-1.26828	12.2231	19.9363	15.416	26.1451	29.2612	5.98192	11.1467	8.1761	7.21438	-1.29925	3.81068e-23
Smp_127810	5.66809	8.51445	-0.971056	2.25359	3.1422	2.76164	8.21958	6.75821	1.33354	15.7114	13.8618	-1.20345	10.3079	14.04	7.70462	25.2164	23.0785	5.71784	8.83317	5.90821	6.86032	-1.29866	2.22279e-40
Smp_132410	0.331774	0.941993	-3.75014	0.56413	0.979361	0	3.92733	3.21022	0.245277	4.84996	1.59009	-1.45068	2.10625	5.43969	1.696	6.37643	4.3914	1.31598	3.26307	1.16048	1.21341	-1.29736	1.66335e-05
Smp_042910	65.1596	98.1501	-1.64977	25.3127	40.6952	37.6034	113.523	115.35	13.5994	65.6813	59.0086	-1.25962	40.156	63.0258	50.4151	94.3419	93.8022	20.527	36.0925	28.1532	28.7715	-1.29673	2.96016e-25
SmVG_030219:Smp_000520	3.67787	4.67115	-1.70101	1.2385	2.55625	1.90479	6.8741	6.77005	0.663979	11.7884	7.7623	-1.41347	6.86026	12.0812	5.37349	14.859	14.7254	3.57844	7.01607	3.03077	4.47132	-1.29467	1.62449e-15
SmVG_030219:Smp_000530	3.67787	4.67115	-1.70101	1.2385	2.55625	1.90479	6.8741	6.77005	0.663979	11.7884	7.7623	-1.41347	6.86026	12.0812	5.37349	14.859	14.7254	3.57844	7.01607	3.03077	4.47132	-1.29467	1.62449e-15
SmVG_031240	22.8692	28.7081	-1.01677	6.36664	13.7377	9.74383	17.0953	25.5318	3.34892	1.53828	1.36009	-1.30219	0.839879	1.4711	1.47684	2.25651	2.01146	0.408329	0.813126	0.794236	0.642125	-1.29138	2.83933e-10
Smp_147460	16.829	26.7698	-1.54087	6.6085	12.6314	11.2698	33.1725	32.2451	3.49194	25.7169	19.2491	-1.23536	18.1223	29.9045	16.0975	36.5405	37.6681	9.01357	16.857	8.72043	12.176	-1.28605	1.51554e-23
Smp_213470	0.813164	1.23948	-1.32374	0.70258	1.14683	1.24875	2.243	2.30821	0.35414	2.02177	0.91834	-1.17965	2.29927	3.34587	1.09673	3.28752	3.67426	1.17393	1.97494	0.615988	0.827242	-1.28594	7.25848e-06
Smp_173100	1.86756	2.63051	-0.796141	0.859127	1.06434	1.49659	2.09965	1.95407	0.4486	3.52925	4.24267	-1.221	2.60017	3.11479	2.78361	5.44427	5.5375	1.28765	1.74745	1.45738	1.86765	-1.28325	1.85434e-29
Smp_131940	4.0831	5.32052	-1.43062	1.06627	2.44255	1.76613	5.66227	4.86336	0.577158	6.61634	5.75443	-1.16942	4.43345	6.01538	4.19483	8.90215	8.69744	2.19473	3.3868	2.2538	2.65823	-1.2726	1.75581e-41
Smp_166960	3.51733	6.06976	-1.44075	1.66092	2.75523	2.31901	5.89056	6.38879	0.856817	7.22458	5.36633	-1.39984	4.71402	7.9576	5.17528	10.5088	10.9843	2.29647	4.43935	2.79322	3.2607	-1.26981	3.81366e-33
Smp_161420	1.47384	1.35118	-0.665698	1.60736	1.86975	0.952116	1.99349	2.08263	0.820731	7.76416	5.89627	-1.41986	8.33691	12.9654	8.26278	17.0506	17.119	4.19697	7.42072	4.36802	5.30134	-1.26326	1.12582e-24
Smp_005790	9.76932	12.8898	-0.601948	4.10661	6.21826	5.40396	9.12716	9.14047	2.09333	13.2426	13.4062	-1.21449	9.93515	13.1822	8.47741	20.207	17.5415	4.83229	7.31831	4.45599	6.43407	-1.26061	1.34187e-34
Smp_171140	9.82694	13.7482	-1.27048	5.45902	9.78148	6.45136	15.3948	13.5542	3.03898	35.2967	13.8167	-1.40856	24.317	46.4016	17.031	48.0708	46.0689	12.7432	27.2956	9.78027	11.3557	-1.25383	4.3656e-08
Smp_142050	2.73194	3.85673	-1.41211	1.38264	1.79182	2.00047	4.32298	3.93903	0.686802	7.23321	5.82761	-1.28019	5.38111	7.51912	4.7827	10.1743	10.0038	2.65528	4.34006	2.59162	3.32088	-1.25104	7.58211e-29
SmVG_024144:Smp_095580	10.2015	12.2914	-0.621159	7.68683	10.7057	8.73773	14.1061	14.689	3.78362	17.7108	13.8518	-1.07928	17.3356	28.2197	15.3478	34.1258	32.8869	8.30085	15.4879	7.96852	9.42531	-1.25098	2.53247e-21
SmVG_024144:Smp_095590	10.2015	12.2914	-0.621159	7.68683	10.7057	8.73773	14.1061	14.689	3.78362	17.7108	13.8518	-1.07928	17.3356	28.2197	15.3478	34.1258	32.8869	8.30085	15.4879	7.96852	9.42531	-1.25098	2.53247e-21
Smp_095630	73.1958	86.2252	-0.336743	35.6712	45.2002	34.7875	49.1514	52.4485	18.7361	115.423	95.3315	-1.12529	78.3321	116.692	72.682	157.741	141.929	38.8771	65.4674	38.6532	46.2085	-1.24995	8.67615e-29
Smp_163380	3.77324	4.37671	-1.50049	1.06485	2.50644	2.27053	5.81472	6.07479	0.560034	2.1325	1.95982	-1.27056	1.03959	2.20781	1.82337	4.01781	3.02264	0.535337	1.29662	1.02723	1.07332	-1.24932	1.15772e-11
SmVG_002891	125.634	152.456	-0.592474	110.002	177.475	123.486	186.731	242.986	57.2862	104.225	77.5386	-1.29811	149.882	212.489	149.936	314.782	321.255	77.0852	123.856	86.6432	90.5231	-1.2436	1.14053e-31
Smp_153070	16.1948	27.5824	-1.24194	17.7747	28.9129	41.6982	60.659	76.2552	9.11722	2.81557	4.56534	-1.28548	8.55016	9.30824	12.2316	19.321	16.9694	4.35162	5.30066	6.56786	8.75178	-1.24307	8.04076e-07
Smp_150730	2.4521	3.96798	-1.63682	0.958437	1.48455	1.67508	4.85087	4.44549	0.526952	4.88575	4.33666	-1.20749	2.88748	4.36487	2.62217	6.08943	5.91301	1.42297	2.5049	1.47612	2.04652	-1.24143	1.31488e-30
SmVG_023113:Smp_142970	6.58183	6.62369	-0.828988	6.76718	9.30103	9.12202	12.3391	12.4653	3.55276	7.41825	6.32087	-1.16356	12.2641	14.9384	10.3392	19.4902	20.564	6.16605	8.56101	5.71097	6.9154	-1.24023	1.52479e-19
SmVG_023113:Smp_142980	6.58183	6.62369	-0.828988	6.76718	9.30103	9.12202	12.3391	12.4653	3.55276	7.41825	6.32087	-1.16356	12.2641	14.9384	10.3392	19.4902	20.564	6.16605	8.56101	5.71097	6.9154	-1.24023	1.52479e-19
Smp_210000	3.13571	4.24094	-1.49732	0.952983	1.29221	1.65339	7.5271	6.90866	0.638103	4.70698	4.70083	-1.05863	3.77822	5.27404	2.46456	8.52851	9.04873	2.71338	3.94347	2.22597	2.878	-1.2398	1.37275e-09
Smp_130580	330.865	345.537	-0.524907	146.784	308.578	178.066	243.365	310.867	75.9302	48.9619	30.2229	-1.37884	37.8014	62.6748	43.6197	79.1784	85.4242	18.678	35.7213	23.4648	21.0757	-1.23691	2.56261e-21
SmVG_006320:Smp_019210	1.78022	2.01258	-0.570696	0.535612	1.15955	1.00955	1.33583	1.24975	0.319508	6.74439	5.29179	-1.18788	4.05851	6.68975	3.8313	8.70226	9.58968	2.21518	3.96067	2.24229	2.8312	-1.23258	2.83093e-25
SmVG_006320:Smp_132700	1.78022	2.01258	-0.570696	0.535612	1.15955	1.00955	1.33583	1.24975	0.319508	6.74439	5.29179	-1.18788	4.05851	6.68975	3.8313	8.70226	9.58968	2.21518	3.96067	2.24229	2.8312	-1.23258	2.83093e-25
Smp_007210	1.58462	3.11173	-1.20483	1.06905	1.29396	1.11256	2.4188	2.20011	0.532486	7.09059	2.83282	-1.247	4.12654	7.44355	1.98216	5.63641	6.81078	2.01091	4.15597	1.07897	1.68801	-1.22853	6.39231e-05
Smp_089460	55.8692	77.9787	-0.715459	27.6716	48.3743	37.9906	65.9355	72.4363	15.1295	80.2204	46.6593	-1.32234	61.6526	100.639	51.9634	122.751	125.013	32.0553	58.791	29.4408	36.6843	-1.22848	9.10709e-18
Smp_181050	41.0775	53.8781	-1.10267	16.2082	28.1211	23.8977	51.5353	52.4019	8.13375	38.7955	29.1029	-1.16141	25.9147	39.6741	23.1846	45.0778	47.5774	12.5987	22.0241	12.0372	14.6403	-1.22399	1.99565e-20
SmVG_024757:Smp_174340	1.50991	1.66887	-1.52951	0.915859	1.04075	0.439935	2.42229	2.01037	0.476646	4.06817	3.66285	-1.20551	2.01599	4.18005	2.0634	4.63384	4.77306	0.986357	2.32008	1.08854	2.00822	-1.22305	2.75633e-11
SmVG_024757:Smp_174350	1.50991	1.66887	-1.52951	0.915859	1.04075	0.439935	2.42229	2.01037	0.476646	4.06817	3.66285	-1.20551	2.01599	4.18005	2.0634	4.63384	4.77306	0.986357	2.32008	1.08854	2.00822	-1.22305	2.75633e-11
Smp_201700	7.69577	9.60286	-1.15774	1.43378	3.99387	3.368	8.41701	9.55736	1.71318	9.62028	7.49975	-1.09262	6.93161	7.84916	6.85364	12.3001	11.95	3.95833	5.92277	4.43478	3.85101	-1.22304	4.18835e-07
SmVG_031568:Smp_005360	3.73667	5.58967	-0.795486	2.08783	3.22673	2.61898	4.9561	5.20906	1.07464	5.95316	4.58508	-1.24601	6.41634	7.56235	3.88389	9.40565	10.4389	3.1465	4.23781	2.11888	3.11168	-1.21764	1.23366e-13
SmVG_031568:Smp_124970	3.73667	5.58967	-0.795486	2.08783	3.22673	2.61898	4.9561	5.20906	1.07464	5.95316	4.58508	-1.24601	6.41634	7.56235	3.88389	9.40565	10.4389	3.1465	4.23781	2.11888	3.11168	-1.21764	1.23366e-13
Smp_154490	11.909	16.7038	-0.632297	4.41636	7.86517	5.28165	10.4335	9.66438	2.26104	32.887	15.9607	-1.16403	15.2322	33.3828	14.1521	32.479	31.2603	7.47626	18.7038	7.55763	8.04999	-1.21399	5.54937e-09
Smp_041550	16.2365	21.7463	-0.520308	13.5495	13.7186	12.4394	18.5356	21.2468	7.03479	20.7603	17.8609	-1.12041	22.2661	28.8708	23.7518	42.2564	43.3091	11.1455	16.5126	12.9219	12.3474	-1.21386	1.31711e-27
Smp_175330	3.26238	4.05536	-1.59881	1.06539	2.19618	1.92541	5.81238	7.88767	0.574543	2.96748	2.6456	-1.21688	3.15716	3.5441	2.61085	4.0655	4.63926	1.55541	1.9811	1.33248	1.69331	-1.21385	2.88368e-07
Smp_196250	2.14271	3.48242	-0.719836	1.37435	1.68697	1.542	2.94367	2.56882	0.747838	15.2073	8.8491	-1.14588	11.026	19.0683	6.71203	17.426	19.0701	5.64741	11.0168	3.78342	5.87282	-1.20098	2.25338e-07
Smp_045360	7.2936	11.2751	-0.92759	2.6791	3.57171	3.19702	9.16593	6.59618	1.48162	38.4355	21.227	-1.10112	22.0611	36.3687	13.7301	35.3062	38.063	10.5515	19.8693	7.4276	9.91902	-1.19915	3.4709e-09
Smp_179490	4.46702	7.4986	-1.30287	2.13073	3.91432	3.45179	7.26919	6.95288	1.13081	15.1284	9.10744	-1.28143	12.4667	19.0679	9.68116	21.2352	22.106	6.31758	10.9524	5.29112	6.20233	-1.19551	1.53947e-14
SmVG_006915:Smp_031430	6.71906	9.34092	-0.56203	4.74958	4.19284	3.21196	5.9054	5.76871	2.50585	11.0045	6.25741	-1.04188	7.44673	11.0171	4.65576	11.1822	11.3662	3.70222	6.27658	2.51589	2.90883	-1.18662	1.63334e-08
SmVG_006915:Smp_139150	6.71906	9.34092	-0.56203	4.74958	4.19284	3.21196	5.9054	5.76871	2.50585	11.0045	6.25741	-1.04188	7.44673	11.0171	4.65576	11.1822	11.3662	3.70222	6.27658	2.51589	2.90883	-1.18662	1.63334e-08
Smp_144030	13.4469	18.7454	-1.17628	5.82537	10.661	7.37835	17.0688	16.5413	3.32762	26.6414	17.585	-1.37678	20.2347	31.9655	18.7581	40.8337	40.5915	10.6858	19.1291	11.149	13.1496	-1.18576	1.7437e-25
Smp_179360	12.6676	19.1154	-0.854853	7.2215	9.4454	7.38013	14.4877	15.9026	3.63592	27.1386	14.58	-1.20033	16.0313	29.274	13.2905	27.7657	30.8967	7.80387	16.1473	7.04659	8.23396	-1.18159	1.46008e-10
Smp_144970	12.4925	17.1742	-0.994206	3.76308	8.78568	7.35251	15.0308	15.4183	1.92641	20.7593	18.103	-1.05552	14.1808	22.1205	12.7323	28.9978	29.4336	6.90536	12.3084	6.67028	9.22865	-1.18148	2.17513e-25
Smp_018870	5.98587	5.20725	-0.859337	2.26375	4.12645	2.35786	4.54378	8.30607	1.18096	1.74032	1.8825	-1.1192	1.50796	2.34655	2.4878	3.52611	3.94476	0.77578	1.38083	1.34002	1.06917	-1.17896	5.64073e-11
Smp_157380	5.8745	9.0425	-0.478898	4.85623	8.8234	10.5533	12.3734	10.0958	2.33893	17.5732	21.4353	-1.08776	30.7862	33.3735	31.2465	65.0096	54.4573	14.4632	18.0642	15.6888	21.2099	-1.17002	1.63747e-25
Smp_194380	15.76	33.1637	-0.770453	2.41583	8.7804	8.83821	13.9728	13.278	1.32085	5.92036	8.52317	-1.19273	2.89156	5.0183	6.84228	9.33776	9.94527	1.58047	2.99442	3.99777	4.06563	-1.1696	6.87845e-07
Smp_136620	8.01888	15.7104	-1.64002	4.81446	4.13514	4.7745	13.1443	13.2167	2.40528	39.5596	44.0744	-1.21662	12.8326	27.6855	20.4681	45.7221	30.4426	6.92779	15.7094	11.1141	16.5706	-1.16855	8.10038e-08
SmVG_028693	27.5169	40.0918	-1.10453	9.80739	16.8667	10.9569	55.0256	50.4256	11.6032	55.9904	33.2826	-1.22749	25.8757	40.597	12.0982	56.6967	90.9871	22.3177	48.4465	12.2714	23.1746	-1.16186	0.000158101
Smp_068500	10.8525	12.7106	-0.568304	4.46432	6.3628	4.5929	6.68238	7.51734	2.18144	18.2384	21.6766	-1.13731	12.9402	16.0521	17.0154	26.2124	26.9587	6.21683	8.97334	8.87424	9.53599	-1.15991	1.92629e-23
Smp_105450	517.615	1232.7	-2.17927	734.882	1758.33	1942.85	7080.75	6956.04	424.225	287.158	331.308	-1.03682	623.967	1106.27	1265.21	1650.18	1730.68	334.493	665.177	735.049	698.858	-1.15681	7.42381e-08
Smp_019030	391.546	734.83	-1.35235	137.495	249.765	368.078	702.001	729.145	71.0228	223.428	219.955	-1.13643	158.82	210.806	180.844	298.432	316.054	77.5179	117.347	95.0802	104.685	-1.15525	1.03256e-26
SmVG_025144:Smp_118100	2.56522	4.1126	-0.716746	1.15434	1.68361	0.872441	2.31173	2.16146	0.601117	8.44715	6.1014	-1.163	4.83336	8.38388	4.30255	9.45185	9.36571	2.43508	4.73409	2.31	3.24445	-1.15341	9.25308e-17
SmVG_025144:Smp_157650	2.56522	4.1126	-0.716746	1.15434	1.68361	0.872441	2.31173	2.16146	0.601117	8.44715	6.1014	-1.163	4.83336	8.38388	4.30255	9.45185	9.36571	2.43508	4.73409	2.31	3.24445	-1.15341	9.25308e-17
Smp_180600	4.08056	6.95515	-0.59631	2.1211	2.78248	1.74003	3.48326	3.7097	1.06834	19.6893	16.5572	-1.16972	12.5019	18.6832	12.7012	25.3022	26.8598	6.17224	10.5379	6.78102	8.0697	-1.1533	1.69998e-31
Smp_134440	9.7738	8.86237	-0.4697	5.48685	10.0824	10.283	11.6345	11.7517	2.93557	11.2911	11.1273	-1.1183	14.8106	18.2541	12.8477	27.9291	26.5974	7.63279	10.514	7.21721	9.65359	-1.15218	1.19998e-34
Smp_135380	1.03021	1.75649	-1.6408	0.474676	0.692708	0.881273	1.89948	1.98551	0.235133	3.19343	1.91238	-1.16177	1.93799	2.99754	1.25892	3.01732	2.92441	0.952041	1.66063	0.644207	0.954216	-1.14874	2.84144e-08
SmVG_018668	17.2336	21.673	-0.450048	8.47546	10.8827	11.2194	17.0873	15.4308	4.67293	32.1808	33.2567	-1.18089	22.7761	32.1975	26.1372	61.2057	44.083	12.2183	19.2676	14.7722	18.746	-1.14654	2.71148e-27
Smp_197410	5.64611	7.26727	-1.24503	1.88937	3.09391	3.39718	7.14528	7.39528	1.05329	9.31337	7.58669	-1.07892	4.84483	8.00545	5.25366	10.6448	10.5304	2.63383	4.88747	3.08097	3.53276	-1.14525	5.19543e-28
Smp_123290	27.6071	47.5378	-1.68747	10.5164	17.2828	17.0871	54.6287	56.7158	5.54907	58.7793	49.2737	-1.06977	38.0349	54.9583	36.0618	69.1702	71.3627	19.101	31.016	19.6311	23.7602	-1.13601	4.79847e-28
Smp_010820	6.0389	6.97757	-0.470228	4.62517	4.92054	3.23471	5.20422	5.74841	2.42207	11.1435	11.8823	-1.16663	10.6308	13.9749	13.3483	20.7136	21.0795	5.19078	7.86795	7.00197	7.89509	-1.1346	3.69268e-23
Smp_129260	23.4057	23.9388	-1.0806	8.94581	18.6416	10.4994	23.7688	27.7942	4.40629	36.3905	20.4386	-1.13654	21.9677	40.7896	18.9372	39.1336	40.4585	10.5342	22.5113	9.71641	11.4649	-1.13153	5.66263e-11
Smp_152020	14.8834	21.8108	-1.65593	6.87089	13.0726	12.866	34.275	35.8794	3.56126	22.0489	16.6987	-1.10611	18.6187	28.6638	17.4792	32.5313	36.3081	9.3076	16.2799	9.49325	11.1394	-1.1297	3.51069e-21
Smp_064200	3.6423	4.28171	-1.12846	1.44811	2.79634	1.83921	4.76252	5.44004	0.821713	4.69477	2.26935	-1.13779	3.33037	5.5872	1.93191	3.98345	5.45005	1.7535	3.4263	1.06855	1.46162	-1.12934	0.000222262
Smp_152090	0.921859	1.63406	-1.17095	0.941761	0.707077	0.763429	1.74303	1.91763	0.489707	5.89558	3.24055	-1.11557	2.51957	5.34078	2.6027	5.25774	5.14684	1.24772	3.04502	1.38272	1.62233	-1.12843	1.09019e-08
Smp_167360	2.3358	2.65335	-0.711695	0.808125	1.37598	1.11972	1.71525	1.92419	0.433838	4.69015	3.92463	-1.1015	3.0019	4.26383	2.30735	5.30441	5.75416	1.5249	2.49322	1.29897	1.83196	-1.12452	9.75569e-17
Smp_125210	1.64783	2.79291	-1.7536	0.214752	0.99035	0.493067	2.64895	1.8468	0.123219	14.3735	7.67409	-1.08541	5.56668	11.7601	4.06994	10.8713	12.0232	3.00841	7.0883	2.46649	3.54328	-1.122	2.57424e-07
Smp_008710	1.7452	2.91768	-0.685663	0.906364	1.05791	0.923372	1.72853	1.74771	0.465732	6.68733	5.59823	-1.06181	4.76753	6.75342	3.64176	8.06189	8.42631	2.35871	3.84635	1.9469	2.87972	-1.12199	5.73762e-17
Smp_202970	199.071	228.788	-0.817484	47.6846	99.73	84.108	122.102	179.522	24.9677	111.092	90.4981	-0.895859	7.74209	13.0334	10.5461	25.3976	30.2757	7.50151	13.8115	8.68941	7.70399	-1.12169	4.18011e-13
Smp_123720	59.7831	62.4094	-0.649832	20.5982	44.1872	29.0916	42.2268	61.6484	10.5713	2.72802	2.00154	-1.03443	1.68514	3.07843	3.08054	3.47583	4.3048	0.861106	1.73954	1.6713	1.01577	-1.11904	1.18334e-05
Smp_138770	7.80996	8.05795	-0.589886	1.94316	4.87048	3.48841	5.05882	5.6791	1.02037	8.84655	7.18633	-1.07113	5.23756	8.37286	3.53418	10.0053	9.05963	2.60119	4.75467	1.93356	3.55393	-1.11879	3.6706e-11
SmVG_022264:Smp_010660	4.67353	8.07647	-1.06122	2.72756	3.25645	3.41886	7.0578	7.68779	1.49782	14.6555	11.1689	-1.08742	8.43002	15.1359	8.77631	19.2793	17.9584	4.4365	8.97826	5.03075	6.13899	-1.11817	1.05279e-22
SmVG_022264:Smp_010670	4.67353	8.07647	-1.06122	2.72756	3.25645	3.41886	7.0578	7.68779	1.49782	14.6555	11.1689	-1.08742	8.43002	15.1359	8.77631	19.2793	17.9584	4.4365	8.97826	5.03075	6.13899	-1.11817	1.05279e-22
Smp_121950	21.716	36.4283	-1.49921	9.73671	13.9034	9.93459	39.5685	35.9694	5.21831	126.447	73.2776	-0.989732	68.8699	130.663	61.2283	136.237	133.437	35.1829	75.744	33.956	39.0534	-1.11546	5.37862e-11
SmVG_023745	5.52846	10.2808	-1.09411	3.0437	4.24168	4.28276	9.04497	7.49115	1.70103	36.0165	22.2805	-1.1403	24.8009	33.1139	15.1017	34.4702	41.3961	12.8284	20.5647	8.23812	11.8036	-1.11185	4.12628e-08
Smp_130300	10.2863	14.9789	-0.875522	3.9461	6.61293	6.3839	12.4407	11.543	2.02815	18.8949	16.3567	-1.03997	12.8089	17.9605	12.9368	23.6358	22.0909	6.21499	10.0597	6.7153	7.90618	-1.10428	2.74893e-27
Smp_024370	24.2443	35.3233	-0.396204	17.9004	19.389	16.8145	23.7482	22.8442	9.09935	46.2451	48.7086	-1.07479	46.5201	54.8303	48.8314	81.9046	81.8535	22.6094	30.4337	25.7721	28.9845	-1.09843	1.12252e-32
Smp_124910	4.57023	6.62224	-0.581535	2.01397	2.94898	2.39737	3.62695	3.51962	1.04889	12.0864	10.8062	-1.0742	7.61725	11.2321	7.72829	13.5305	13.16	3.76982	6.29823	4.15342	5.23559	-1.09559	5.3629e-24
SmVG_035997	5.88054	5.60149	-0.922393	2.84062	4.55529	5.96124	11.8923	5.60232	1.72834	22.1351	25.3374	-0.924667	21.9461	24.7243	20.5044	42.4703	43.1351	12.0373	15.1641	11.9883	18.147	-1.09496	5.67257e-12
Smp_146010	9.83884	9.71033	-0.972256	3.50383	6.65358	5.93451	10.0849	12.4746	1.82332	5.67949	5.18414	-1.03154	3.41027	5.70444	3.60955	6.73737	6.8574	1.59439	3.20861	1.85359	2.57466	-1.0945	1.52574e-14
Smp_189490	7.04038	7.39891	-0.338011	2.13611	4.04925	3.03401	3.62175	4.57653	1.23598	3.84657	2.74383	-1.23125	2.10316	3.50059	1.78994	5.38875	4.68479	1.38661	2.31311	1.34433	1.68886	-1.09446	1.31228e-20
Smp_154140	3.08738	3.49186	-1.35671	1.55469	2.93218	2.43045	5.78551	5.83326	0.842561	6.77469	5.0529	-1.22989	5.74424	9.63948	5.68084	11.3026	11.8827	2.89691	5.5444	3.13414	4.31587	-1.09067	1.59673e-20
Smp_130260	7.64069	12.9166	-1.69366	2.82367	5.00366	3.89726	16.3286	14.7217	1.54587	44.5983	32.479	-0.973248	29.4178	46.9063	26.7067	54.8645	55.1007	15.1429	27.1034	14.8266	17.485	-1.08237	2.82697e-18
Smp_156530	2.05222	5.54746	-1.26289	1.32374	1.48477	1.27139	4.97957	3.93939	0.707745	11.6902	8.67342	-0.880887	7.92578	13.7445	6.01014	13.2117	15.6366	4.13346	7.97859	3.27096	4.50426	-1.08143	3.11449e-08
Smp_131690	4.37135	6.00316	-0.897492	1.99652	3.33108	2.98832	5.35734	7.42226	1.07312	3.34422	2.89048	-0.982557	2.77018	3.68038	2.62001	4.72617	4.46754	1.48914	2.13246	1.44186	1.72945	-1.07979	9.91495e-14
Smp_076300	1.28397	2.26702	-1.46262	1.00171	0.775415	0.646269	2.52678	2.4671	0.548526	11.0596	5.21459	-1.06353	6.33905	10.3187	2.75461	8.40977	9.69326	3.26725	5.91219	1.52735	2.74803	-1.07827	0.000123009
Smp_056990	9.46027	22.6753	-1.63196	7.43466	9.63682	7.38864	33.0692	35.4399	4.31408	57.2871	28.6496	-1.26582	50.1479	86.1941	38.6395	83.5852	86.1687	26.5376	51.0999	22.3357	26.3218	-1.07722	1.8967e-09
SmVG_018828:Smp_057950	58.0834	74.9251	-0.86202	25.8074	45.6741	38.0486	69.4432	71.4105	12.6143	95.779	69.5839	-1.0257	67.7576	110.244	61.399	122.23	119.17	32.2408	60.125	31.6888	37.7407	-1.07685	1.68931e-15
SmVG_018828:Smp_153310.1	58.0834	74.9251	-0.86202	25.8074	45.6741	38.0486	69.4432	71.4105	12.6143	95.779	69.5839	-1.0257	67.7576	110.244	61.399	122.23	119.17	32.2408	60.125	31.6888	37.7407	-1.07685	1.68931e-15
SmVG_018828:Smp_153310.2	58.0834	74.9251	-0.86202	25.8074	45.6741	38.0486	69.4432	71.4105	12.6143	95.779	69.5839	-1.0257	67.7576	110.244	61.399	122.23	119.17	32.2408	60.125	31.6888	37.7407	-1.07685	1.68931e-15
SmVG_018828:Smp_153320	58.0834	74.9251	-0.86202	25.8074	45.6741	38.0486	69.4432	71.4105	12.6143	95.779	69.5839	-1.0257	67.7576	110.244	61.399	122.23	119.17	32.2408	60.125	31.6888	37.7407	-1.07685	1.68931e-15
Smp_165170	4.41369	7.37325	-1.36277	1.25314	3.18536	4.17208	8.18004	8.46467	0.652636	7.05494	7.25986	-0.972164	4.86936	8.06214	4.50399	9.00328	9.6237	2.407	4.54886	2.44368	4.28203	-1.07634	4.1834e-14
Smp_199900	9.12626	21.3278	-1.97549	6.94556	4.86124	3.20114	59.9092	50.8053	8.18389	14.9455	8.33359	-1.12636	8.46539	10.2945	5.72997	40.3074	45.3072	9.73274	20.7597	7.683	10.7478	-1.07624	6.4312e-05
Smp_134080	8.49866	8.92729	-0.570523	3.15561	6.07813	4.21181	5.6946	7.27353	1.67259	8.88477	7.95163	-1.05639	5.77742	9.62235	5.32123	11.5475	11.1047	2.91172	5.47393	2.86382	4.55884	-1.07494	4.09727e-16
Smp_090080	502.979	689.718	-0.612721	209.008	456.598	343.903	490.599	662.285	115.277	463.528	318.233	-1.13228	388.395	630.519	396.551	725.768	791.568	201.732	366.859	225.923	250.99	-1.07334	3.3137e-19
Smp_157590	11.5133	18.0921	-0.720874	6.08285	8.27413	6.90744	12.9249	12.2692	3.10701	23.4706	16.7011	-1.02242	16.4103	24.2722	13.8839	26.452	27.4127	8.15777	13.6643	7.44636	8.6979	-1.07256	6.61415e-16
Smp_169260	7.10355	14.3669	-2.46929	3.52769	4.30021	2.58742	25.8351	21.3987	1.85974	47.7286	24.3615	-1.00179	22.7361	44.0061	17.7061	38.6692	39.8956	11.412	24.8466	9.67497	11.7081	-1.07243	1.43899e-07
SmVG_022204:Smp_126500	1.63202	2.47405	-0.560816	0.747352	0.820087	0.642717	1.9387	1.6163	0.591251	6.26361	5.35645	-1.07286	4.96922	6.46746	2.976	9.10677	9.69775	3.03074	4.51763	2.47613	3.57015	-1.06991	1.26688e-14
SmVG_022204:Smp_126510	1.63202	2.47405	-0.560816	0.747352	0.820087	0.642717	1.9387	1.6163	0.591251	6.26361	5.35645	-1.07286	4.96922	6.46746	2.976	9.10677	9.69775	3.03074	4.51763	2.47613	3.57015	-1.06991	1.26688e-14
Smp_150740	7.89456	11.4102	-1.54627	2.07317	5.05175	3.55009	10.9178	16.1595	1.14751	9.69164	7.35249	-0.954884	4.71519	9.06596	4.22648	9.4176	9.94536	2.44927	5.2778	2.47202	3.46123	-1.068	2.25057e-13
Smp_144770	15.0662	19.2549	-0.690017	6.87762	10.441	9.55483	15.0269	15.4828	3.56079	26.1803	20.8893	-1.01396	16.9455	26.7831	16.9526	30.3066	31.912	8.40434	15.0875	9.12331	10.9735	-1.06675	1.30359e-21
SmVG_032736:Smp_039130	41.0954	51.1318	-1.1193	17.3806	38.1947	25.7418	52.4434	69.2792	9.05146	23.439	14.6288	-1.08155	19.5057	31.9399	21.5187	34.6648	39.3561	9.61788	18.066	11.392	11.0776	-1.06496	2.09016e-16
SmVG_032736:Smp_177270	41.0954	51.1318	-1.1193	17.3806	38.1947	25.7418	52.4434	69.2792	9.05146	23.439	14.6288	-1.08155	19.5057	31.9399	21.5187	34.6648	39.3561	9.61788	18.066	11.392	11.0776	-1.06496	2.09016e-16
SmVG_032736:Smp_188720	41.0954	51.1318	-1.1193	17.3806	38.1947	25.7418	52.4434	69.2792	9.05146	23.439	14.6288	-1.08155	19.5057	31.9399	21.5187	34.6648	39.3561	9.61788	18.066	11.392	11.0776	-1.06496	2.09016e-16
SmVG_032736:Smp_188730	41.0954	51.1318	-1.1193	17.3806	38.1947	25.7418	52.4434	69.2792	9.05146	23.439	14.6288	-1.08155	19.5057	31.9399	21.5187	34.6648	39.3561	9.61788	18.066	11.392	11.0776	-1.06496	2.09016e-16
Smp_198650	2.26606	2.11126	-1.06751	1.81284	2.68475	1.90855	4.79199	3.64885	0.912217	3.31208	3.51523	-1.07445	4.37261	5.21234	2.61455	5.57704	6.55425	2.17355	2.89754	1.34242	2.99015	-1.06336	3.8182e-05
SmVG_031401:Smp_076500	2.33459	3.1852	-0.918266	1.48873	1.91212	1.84426	3.47255	2.86081	0.781862	9.16803	8.45545	-1.03838	7.53358	10.5696	6.38594	13.2614	13.9449	3.77527	6.00319	3.46716	5.21246	-1.06313	2.11241e-19
SmVG_031401:Smp_163360	2.33459	3.1852	-0.918266	1.48873	1.91212	1.84426	3.47255	2.86081	0.781862	9.16803	8.45545	-1.03838	7.53358	10.5696	6.38594	13.2614	13.9449	3.77527	6.00319	3.46716	5.21246	-1.06313	2.11241e-19
SmVG_031401:Smp_187280	2.33459	3.1852	-0.918266	1.48873	1.91212	1.84426	3.47255	2.86081	0.781862	9.16803	8.45545	-1.03838	7.53358	10.5696	6.38594	13.2614	13.9449	3.77527	6.00319	3.46716	5.21246	-1.06313	2.11241e-19
Smp_160460	4.96132	7.06766	-0.734888	1.48322	2.97927	2.71269	4.8223	4.6893	0.78029	12.8768	12.72	-1.01986	8.64423	12.2706	8.77826	16.8692	16.0742	4.23492	6.90422	4.72793	6.01918	-1.06209	2.59046e-30
Smp_021920	12.0798	19.7703	-0.505369	12.5829	12.3068	13.6408	15.9358	18.2275	6.39823	39.9562	63.3584	-1.04005	71.5683	57.7142	72.9949	116.559	134.396	34.9212	31.9903	38.7844	47.1943	-1.06164	3.31313e-10
Smp_204050	0.721424	0.708506	-1.92361	0.231489	0.937078	1.07186	3.20766	3.22324	0.156236	1.46861	1.869	-1.29082	1.67338	2.40491	2.60305	5.88241	4.3494	1.15525	1.62458	1.67805	1.80815	-1.05963	1.61548e-12
SmVG_025079:Smp_086110	0.393277	0.85698	-1.92028	0.3553	0.413394	0.4775	1.49646	1.23481	0.189384	0.865709	0.48978	-0.90637	0.796553	0.881214	0.669241	1.09116	1.31898	0.405974	0.516802	0.369292	0.412555	-1.05879	9.74593e-09
SmVG_025079:Smp_168970	0.393277	0.85698	-1.92028	0.3553	0.413394	0.4775	1.49646	1.23481	0.189384	0.865709	0.48978	-0.90637	0.796553	0.881214	0.669241	1.09116	1.31898	0.405974	0.516802	0.369292	0.412555	-1.05879	9.74593e-09
Smp_058190	6.02996	7.26173	-0.878459	4.22261	8.36172	8.73871	12.8004	14.4118	2.2221	4.4718	6.76583	-0.835028	8.91208	9.52234	9.49282	17.0001	16.2714	4.463	5.46223	5.18225	6.62806	-1.0565	8.08794e-17
SmVG_000056:Smp_089700	21.5883	30.4993	-0.711859	10.8997	14.5832	12.4561	21.7319	21.4593	5.46897	49.0013	36.2863	-1.00484	31.3817	48.8234	27.7334	53.055	55.5479	14.9375	26.6703	14.2805	17.5213	-1.05396	3.48446e-17
SmVG_000056:Smp_171080	21.5883	30.4993	-0.711859	10.8997	14.5832	12.4561	21.7319	21.4593	5.46897	49.0013	36.2863	-1.00484	31.3817	48.8234	27.7334	53.055	55.5479	14.9375	26.6703	14.2805	17.5213	-1.05396	3.48446e-17
Smp_169050	8.35799	10.4192	-0.449225	3.02579	5.75022	4.20232	6.18065	7.37229	1.48534	13.6325	11.7276	-0.97949	9.5135	14.3914	12.208	19.2917	18.1198	4.62216	8.0068	6.36366	5.99866	-1.05176	1.72212e-22
Smp_158550	2.70736	5.46418	-1.38936	1.18429	1.81079	2.43153	4.82112	5.10687	0.595235	9.71291	8.76352	-0.998573	6.7143	9.42351	6.76842	11.7402	13.0191	3.29842	5.23723	3.55636	4.47238	-1.05149	1.03835e-26
Smp_134430	1.66167	2.30862	-1.0229	0.787985	1.08401	1.05087	2.1404	2.17718	0.408911	4.9894	4.94672	-0.971283	3.05024	5.29028	3.91612	6.82949	7.16628	1.55246	3.01426	2.13342	2.74121	-1.05055	1.78292e-16
Smp_042020	11.6076	16.7668	-0.883271	4.6025	6.16928	3.97472	11.6145	9.7733	2.53745	90.0662	48.1376	-0.939075	39.4786	77.0047	35.9894	76.3767	72.1076	20.4065	44.7808	20.1094	22.199	-1.04837	1.85091e-09
SmVG_020546:Smp_035930	4.41091	4.52103	-0.739597	1.93402	3.65914	2.96252	4.3376	4.49926	1.00747	7.48422	6.79444	-0.99914	5.86287	9.00697	6.28024	11.8994	10.8149	2.91096	5.09031	3.37186	4.14787	-1.0479	1.11243e-25
SmVG_020546:Smp_141530	4.41091	4.52103	-0.739597	1.93402	3.65914	2.96252	4.3376	4.49926	1.00747	7.48422	6.79444	-0.99914	5.86287	9.00697	6.28024	11.8994	10.8149	2.91096	5.09031	3.37186	4.14787	-1.0479	1.11243e-25
SmVG_000311	6.23165	7.06397	-0.787434	12.8691	19.1297	21.4391	43.3748	53.4121	9.34617	1.69423	3.79206	-0.960088	4.62673	5.42985	9.40852	21.2358	18.0598	2.4236	4.07007	6.61641	8.31668	-1.04623	0.000797847
Smp_196920	5.45569	7.65141	-0.733379	1.60405	3.01267	2.29759	3.80582	5.76581	0.837311	3.81414	2.93801	-1.03256	2.46069	3.29323	2.26169	4.32681	3.81961	1.23579	1.87264	1.22724	1.38076	-1.04559	8.32497e-17
Smp_001410	18.7889	17.2098	-0.355408	9.68561	14.1456	9.80732	12.7285	15.5172	4.84425	12.1394	12.0975	-0.921728	12.4346	15.1331	11.7061	18.3881	18.7372	5.99845	8.44702	6.13724	7.32593	-1.04503	9.26109e-20
Smp_152990	1.12917	2.11721	-1.31279	0.131085	0.68592	0.339833	1.14854	1.04975	0.0689961	2.3339	1.61322	-0.836128	0.63706	1.95573	1.77878	1.85875	2.83132	0.319314	1.11976	0.956607	0.843187	-1.04434	0.000219366
Smp_173380	2.44476	3.52162	-1.10173	0.847522	1.3656	0.776974	2.838	2.19496	0.508917	10.0701	8.38137	-1.00374	7.63038	8.17064	4.06221	10.3349	10.3627	3.64496	4.80356	2.61077	3.67729	-1.0442	5.2107e-12
Smp_181270	2.12328	1.81568	-0.671883	0.718047	1.40432	1.35859	1.59288	1.71914	0.356861	2.38949	2.763	-1.051	1.66382	2.40179	1.87459	4.65165	2.83761	0.828478	1.39809	1.03631	1.40332	-1.04278	1.37725e-11
Smp_083580	32.9269	61.4154	-1.00116	15.7802	20.0476	21.0544	116.386	142.091	26.2704	30.4712	67.5073	-1.10222	17.6658	23.2375	46.3223	225.449	209.606	31.6634	46.5148	68.5483	91.2251	-1.04057	8.59746e-05
SmVG_015140:Smp_114470	5.4433	6.79435	-0.666324	2.69365	5.50528	3.98722	6.28987	7.76257	1.426	5.21034	3.10184	-1.04895	4.83378	7.78777	4.12962	7.75352	8.48666	2.43316	4.45837	2.33907	2.62643	-1.04036	2.34413e-12
SmVG_015140:Smp_138100	5.4433	6.79435	-0.666324	2.69365	5.50528	3.98722	6.28987	7.76257	1.426	5.21034	3.10184	-1.04895	4.83378	7.78777	4.12962	7.75352	8.48666	2.43316	4.45837	2.33907	2.62643	-1.04036	2.34413e-12
SmVG_012657:Smp_172330	2.81966	3.99455	-0.59956	1.14378	1.56724	1.14094	2.32682	2.29235	0.663518	15.299	10.0894	-0.920014	6.50003	13.8222	6.09926	13.2671	14.4739	3.37918	8.02404	3.58206	4.79202	-1.03359	5.73918e-10
SmVG_012657:Smp_196080	2.81966	3.99455	-0.59956	1.14378	1.56724	1.14094	2.32682	2.29235	0.663518	15.299	10.0894	-0.920014	6.50003	13.8222	6.09926	13.2671	14.4739	3.37918	8.02404	3.58206	4.79202	-1.03359	5.73918e-10
Smp_164810	1.18321	1.36692	-0.840903	0.429017	0.724251	0.649809	1.22339	1.15284	0.300996	3.56939	2.74963	-1.07979	2.69163	3.86043	1.76019	5.18811	5.13235	1.81168	2.62681	1.25333	1.72293	-1.02773	1.18731e-08
SmVG_015105	1.39979	2.00132	-0.922947	0.783251	1.08925	1.28381	1.97736	1.74273	0.394962	2.10477	1.95844	-1.03558	1.65499	2.31598	1.65465	2.98205	2.63288	0.800488	1.28609	0.821812	1.03478	-1.02525	7.91376e-16
Smp_166790	15.8907	17.1249	-0.782775	12.59	16.1944	18.8466	23.3481	24.94	6.67294	21.8003	21.2423	-1.11239	27.4608	30.5335	20.8482	45.015	37.6429	13.8429	17.5837	11.4807	17.2349	-1.02278	2.29308e-20
SmVG_024005:Smp_194800	7.20758	9.34687	-0.775743	3.40129	5.33857	4.30302	8.00136	6.04432	1.70681	19.612	10.811	-0.993014	11.4278	21.2517	8.92385	18.4947	18.6476	5.50771	11.8313	4.67203	6.03839	-1.02183	4.13452e-07
SmVG_024005:Smp_194810	7.20758	9.34687	-0.775743	3.40129	5.33857	4.30302	8.00136	6.04432	1.70681	19.612	10.811	-0.993014	11.4278	21.2517	8.92385	18.4947	18.6476	5.50771	11.8313	4.67203	6.03839	-1.02183	4.13452e-07
Smp_125160	3.78138	5.73697	-0.931797	1.19909	1.84121	1.2424	4.03007	3.97477	0.804497	7.54066	7.39058	-0.92867	4.30262	6.16663	3.76361	7.9538	7.97337	2.30202	3.62968	2.41366	3.34066	-1.0217	3.37731e-23
Smp_143340	0.820315	1.43761	-1.19464	0.412552	0.437479	0.398671	1.99654	1.86581	0.385432	4.50538	4.25993	-1.06201	3.18499	4.80096	3.00985	6.34111	7.17767	1.96804	3.2985	1.97004	2.87794	-1.02099	1.90657e-14
SmVG_031352:Smp_031880	32.0108	45.0229	-0.462969	15.0107	18.9374	15.1895	22.1112	23.275	7.6195	62.2616	45.661	-0.997948	36.5778	55.0652	36.4059	62.9207	61.8495	17.8181	30.5732	19.2062	20.5764	-1.02077	4.25364e-20
SmVG_031352:Smp_198920	32.0108	45.0229	-0.462969	15.0107	18.9374	15.1895	22.1112	23.275	7.6195	62.2616	45.661	-0.997948	36.5778	55.0652	36.4059	62.9207	61.8495	17.8181	30.5732	19.2062	20.5764	-1.02077	4.25364e-20
Smp_162900	7.25945	7.84858	-0.694423	1.81365	4.53085	3.31781	5.23771	6.12175	0.933359	8.09671	10.3759	-0.973282	6.28726	7.6109	7.31821	11.6628	11.6809	3.14374	4.26953	3.93874	4.98853	-1.018	7.03938e-24
Smp_144450	5.7882	8.32376	-1.06879	2.34582	3.48928	2.99575	5.93111	6.02036	1.21628	8.25745	6.30402	-0.948631	5.02996	7.75397	3.69991	7.17394	7.82811	2.33577	4.15851	1.95636	2.70371	-1.01777	2.75323e-11
Smp_007330	7.00045	8.95161	-0.922778	4.467	5.92534	6.69682	9.58407	9.29657	2.26303	5.02861	4.21656	-1.0251	3.88646	6.1627	3.907	6.81267	6.94216	1.87765	3.46863	2.03255	2.73392	-1.01777	1.38445e-14
Smp_176610	19.4385	35.6744	-1.77971	6.43351	11.1815	7.48142	34.8942	32.3064	3.46755	108.133	56.4957	-0.962824	46.6194	93.4343	46.1835	83.8262	88.0175	23.9126	54.2034	25.5286	25.9812	-1.01684	2.33654e-08
Smp_151100	2.37614	3.27779	-0.52343	1.54407	2.19458	1.70832	2.37998	2.449	0.778944	5.82501	5.88378	-1.06243	6.29742	7.77438	4.35385	8.93147	9.69983	3.09101	4.24692	2.31865	3.8712	-1.01677	6.84979e-13
Smp_103160	25.5683	35.5116	-0.812425	13.521	23.1789	16.8044	34.4276	33.5754	6.87227	41.7317	32.3867	-0.94521	34.8384	53.6175	30.4308	61.4027	57.6806	17.1667	29.8669	16.2464	20.4116	-1.01419	1.50157e-17
Smp_153780	4.71877	7.34385	-0.479741	1.83189	2.89084	2.26386	3.44361	3.64853	0.938878	28.7354	23.8237	-0.969806	16.3818	27.2951	16.0096	30.5615	32.1523	8.00314	15.1928	8.49267	11.5131	-1.0122	1.39278e-19
Smp_144590	3.00552	3.89656	-0.475529	1.25812	1.86987	1.19939	2.35074	2.16872	0.673968	7.79276	5.37941	-1.0056	4.59381	7.61858	3.87013	7.79321	8.13302	2.34551	4.40945	2.1537	2.86346	-1.01171	1.37509e-11
Smp_102340	23.846	30.9915	-0.845094	7.97021	14.6674	12.4213	21.3895	21.6949	4.06128	37.1037	36.5576	-0.972676	24.2887	34.6454	23.8356	40.7326	43.1104	11.8152	19.2383	12.5221	17.2512	-1.0086	2.79353e-24
Smp_041370	3.64463	4.67349	-0.349603	1.72497	2.64764	2.44056	2.87557	2.85602	0.891483	4.49028	4.64212	-1.01849	3.67644	4.37363	2.81448	5.93604	5.36606	1.82177	2.47972	1.48479	2.37365	-1.00785	5.90421e-18
SmVG_024852:Smp_130750	20.2838	23.2957	-0.859479	9.99521	19.7026	12.7365	21.6002	29.3856	5.20918	15.068	6.33972	-1.09553	10.2679	20.0106	7.25743	15.9877	17.5214	5.13949	11.275	4.00032	4.96822	-1.00658	9.21484e-06
SmVG_024852:Smp_199990	20.2838	23.2957	-0.859479	9.99521	19.7026	12.7365	21.6002	29.3856	5.20918	15.068	6.33972	-1.09553	10.2679	20.0106	7.25743	15.9877	17.5214	5.13949	11.275	4.00032	4.96822	-1.00658	9.21484e-06
Smp_145420	4.812	5.98687	-0.748796	1.44496	3.13913	2.72518	4.66909	4.5126	0.750133	8.35964	8.83319	-0.964292	6.07027	8.69833	6.37277	11.5376	10.4721	3.02307	4.90121	3.46242	4.7085	-1.00596	1.13621e-23
Smp_201600	1.26463	1.70827	-0.908857	1.56616	1.2198	1.00331	2.46036	2.27977	0.824582	4.9558	4.83097	-0.927747	4.49624	7.00728	4.46888	9.47023	7.37426	2.30229	4.12947	2.54171	3.4867	-1.00577	1.98561e-16
SmVG_020027:Smp_214000	3.82892	4.50159	-0.440338	1.33762	2.70126	2.44454	3.10379	3.13936	0.716324	8.0353	8.51858	-0.894799	6.59813	7.7876	5.1872	10.4736	10.2624	3.32708	4.43013	2.84095	4.23201	-1.0029	4.5296e-21
SmVG_020027:Smp_214010	3.82892	4.50159	-0.440338	1.33762	2.70126	2.44454	3.10379	3.13936	0.716324	8.0353	8.51858	-0.894799	6.59813	7.7876	5.1872	10.4736	10.2624	3.32708	4.43013	2.84095	4.23201	-1.0029	4.5296e-21
Smp_137940	4.08024	4.79044	-0.748361	3.61255	3.78034	2.90508	7.43764	8.88818	2.83278	17.5336	19.7056	-1.16785	19.4416	23.769	16.8085	45.4863	46.3574	13.1718	17.0495	13.2923	19.6468	-1.00073	6.75623e-20
Smp_160580	19.4891	22.0169	-0.644939	13.8987	20.0837	15.8311	24.6879	24.5746	7.40082	61.7741	37.8637	-1.02958	57.3629	93.4849	50.3881	95.2015	91.2001	29.2081	53.6153	28.0162	32.3583	-0.999895	9.21738e-13
Smp_123680	9.5234	12.3237	-0.643952	4.14579	6.97348	4.54346	10.1685	9.16111	2.16938	27.1369	19.7812	-0.869295	18.507	32.9636	17.3101	33.9892	35.3141	9.33547	19.0444	9.48085	12.4684	-0.996883	2.03191e-14
Smp_071150	31.9278	39.3293	-0.537928	16.9083	19.2754	13.0056	23.57	22.1907	8.98585	52.9221	23.5126	-0.990441	29.9708	48.2671	19.2125	41.3064	41.7867	15.117	27.5228	10.6257	11.5336	-0.996607	1.06955e-05
SmVG_012251:Smp_159720	3.04065	4.79592	-0.563898	1.28979	1.96418	1.84712	3.13757	3.37969	0.718986	11.2732	7.02385	-0.955302	6.35287	11.8452	5.4946	12.3431	12.0476	3.33934	6.86799	3.09384	3.97979	-0.996049	7.92041e-10
SmVG_012251:Smp_192080	3.04065	4.79592	-0.563898	1.28979	1.96418	1.84712	3.13757	3.37969	0.718986	11.2732	7.02385	-0.955302	6.35287	11.8452	5.4946	12.3431	12.0476	3.33934	6.86799	3.09384	3.97979	-0.996049	7.92041e-10
Smp_166820	2.32382	2.933	-1.06097	1.11667	2.12065	1.49817	3.63312	3.30887	0.582573	1.63206	0.703111	-1.14084	0.734672	2.10164	0.90504	1.82474	1.75053	0.35425	1.16052	0.470168	0.641432	-0.995936	7.38242e-06
SmVG_012159:Smp_099800	9.91436	12.7624	-1.16744	5.97369	10.1281	10.3475	17.7008	17.4952	3.12369	19.0425	16.0263	-1.12322	18.0571	28.3695	17.1974	31.4993	30.3628	8.97167	15.9309	9.20419	12.3493	-0.993841	2.04856e-19
SmVG_012159:Smp_099810	9.91436	12.7624	-1.16744	5.97369	10.1281	10.3475	17.7008	17.4952	3.12369	19.0425	16.0263	-1.12322	18.0571	28.3695	17.1974	31.4993	30.3628	8.97167	15.9309	9.20419	12.3493	-0.993841	2.04856e-19
SmVG_012159:Smp_176890	9.91436	12.7624	-1.16744	5.97369	10.1281	10.3475	17.7008	17.4952	3.12369	19.0425	16.0263	-1.12322	18.0571	28.3695	17.1974	31.4993	30.3628	8.97167	15.9309	9.20419	12.3493	-0.993841	2.04856e-19
Smp_102190	16.3109	19.1399	-0.935121	3.45218	7.67485	4.49702	11.5836	19.0541	2.57427	17.4058	13.8198	-0.974352	9.83996	12.6284	9.07339	22.2924	21.6608	6.60055	9.71708	5.99436	6.52476	-0.993711	6.26566e-12
Smp_040080	29.3188	34.1838	-1.02126	12.3296	20.5134	18.8222	30.0627	34.052	6.5123	38.24	36.7585	-1.04193	28.1238	39.4001	30.7919	50.331	47.197	13.8349	22.3431	16.5693	20.2842	-0.990063	3.06521e-26
Smp_139230	3.32921	4.59317	-1.17878	1.98766	2.64513	3.19921	6.69906	6.98111	0.925975	4.60011	4.20557	-0.819806	3.95565	5.55108	3.78597	6.19122	6.62978	1.81253	3.00885	1.95063	2.58537	-0.988353	8.15422e-21
Smp_209010	4.92351	5.61012	-1.29872	1.48876	3.42269	2.62123	5.51108	5.51837	0.862719	10.3754	5.29986	-1.05438	5.39288	9.59569	3.09274	8.47962	8.43127	2.92176	5.88835	1.73753	2.76011	-0.987544	0.00010471
Smp_131500	172.919	262.733	-0.622538	51.0684	120.824	134.419	161.157	171.224	27.4329	47.5601	78.5809	-0.92719	43.2133	54.2079	66.9722	91.5436	90.9351	21.9651	31.2757	37.0441	44.3424	-0.987515	8.16702e-08
Smp_161680	7.8012	8.65227	-0.405633	4.54593	8.22492	6.97	8.1722	9.19512	2.34193	6.81412	6.30595	-0.935379	7.11846	10.6452	7.86392	13.078	13.2731	3.51076	5.99705	4.14697	5.11262	-0.986474	1.00658e-25
SmVG_002486	2.98631	3.92693	-0.718513	0.904432	1.78277	1.05607	3.42626	3.38565	1.07739	3.75869	1.90513	-1.02903	1.49576	2.30968	1.34701	4.01602	3.68639	1.27322	2.54317	1.09864	1.12382	-0.985794	4.27996e-06
Smp_086470	6.76238	13.9242	-1.48446	4.08168	8.87976	9.67918	20.1582	19.2367	2.16935	7.50368	9.4257	-1.03884	6.20482	10.4644	11.5048	15.2757	16.0843	3.22951	6.13708	6.22938	7.31069	-0.984901	1.1971e-08
Smp_129120	5.26318	5.26732	-0.474641	1.37717	3.9926	2.98246	4.38682	4.53304	0.782395	12.3379	8.2621	-0.92936	7.96123	13.4662	5.36543	14.6484	13.5704	4.12449	7.87486	3.06687	5.06411	-0.9846	1.35518e-08
Smp_051930	27.6263	30.0303	-1.13547	9.18844	20.0737	14.477	42.4588	41.7208	5.54186	22.0934	17.4289	-0.761717	15.8402	26.91	15.8769	32.289	31.5344	8.93446	16.6607	9.96567	11.1439	-0.983037	5.36333e-19
Smp_154670	7.53008	15.2593	-1.77201	1.96466	4.26088	3.77052	11.3496	13.5194	1.02969	23.1885	16.092	-0.965593	13.0414	19.7726	12.5809	19.9002	20.9979	6.53533	11.2598	6.78551	7.17344	-0.982686	3.32447e-13
Smp_199290	37.0179	50.1233	-1.18898	12.1968	23.6488	16.9795	38.7504	61.7712	7.00542	16.8866	6.2223	-1.00966	11.5089	16.0992	6.02465	14.1782	18.9345	6.35523	10.3886	3.36745	3.83099	-0.981464	0.000949786
Smp_024820	8.0063	9.99274	-0.500125	14.587	16.1626	13.3535	15.4087	17.1744	6.88617	19.369	16.6887	-1.18888	39.1504	51.3529	40.3168	64.1039	62.9682	18.2502	27.9191	20.0276	25.6436	-0.98073	2.53217e-28
SmVG_036118	0.186849	1.62568	-1.80158	0.301569	0.219207	0.325293	1.87727	2.04215	0.217764	2.97269	2.05581	-0.83983	3.28665	3.95255	3.18227	5.77013	5.1899	2.03805	2.57075	1.9786	1.72036	-0.979553	2.21051e-08
Smp_198690	5.78686	4.85535	-0.779087	2.68175	5.44198	4.29116	6.02214	7.6103	1.36645	6.02602	4.0972	-1.19024	5.71503	7.53441	5.27189	10.0437	8.33445	2.82398	4.25928	2.83412	3.39888	-0.978569	1.61389e-18
SmVG_002880:Smp_144280	4.01936	5.56707	-0.613549	2.48336	2.99806	2.2996	4.45893	3.48446	1.28605	20.6388	13.6251	-0.91633	14.1817	22.7532	10.032	22.2283	21.4111	7.14098	13.0065	5.48184	7.88792	-0.978549	2.96291e-08
SmVG_002880:Smp_144290	4.01936	5.56707	-0.613549	2.48336	2.99806	2.2996	4.45893	3.48446	1.28605	20.6388	13.6251	-0.91633	14.1817	22.7532	10.032	22.2283	21.4111	7.14098	13.0065	5.48184	7.88792	-0.978549	2.96291e-08
SmVG_002880:Smp_144300	4.01936	5.56707	-0.613549	2.48336	2.99806	2.2996	4.45893	3.48446	1.28605	20.6388	13.6251	-0.91633	14.1817	22.7532	10.032	22.2283	21.4111	7.14098	13.0065	5.48184	7.88792	-0.978549	2.96291e-08
Smp_126260	3.22523	5.16713	-1.28605	1.3801	1.96107	2.4733	5.20322	4.711	0.72767	19.4591	16.8452	-0.925761	11.4835	16.9273	10.206	20.2989	17.9176	5.76266	9.67302	5.59991	7.80211	-0.976254	3.57548e-19
Smp_176770	1.73391	3.00556	-1.46426	0.779964	1.34423	1.62036	3.64957	3.93347	0.424563	3.65677	3.48878	-1.03176	2.68033	4.27729	2.33096	4.86366	4.73748	1.37851	2.46537	1.31731	2.00911	-0.974788	5.80108e-17
Smp_198700	1.961	3.43062	-1.5775	1.27369	1.80559	2.41915	5.29365	3.98593	0.665193	8.15996	5.78056	-1.00641	6.95522	10.1112	4.47391	9.62942	9.54369	3.45333	5.66369	2.34476	3.49542	-0.972599	4.76063e-06
Smp_129840	2.51431	3.53592	-0.913328	1.01367	1.58983	1.07795	2.58868	2.72856	0.507327	4.53633	3.88513	-0.915977	3.06178	4.31166	3.5385	5.30175	5.2062	1.482	2.39983	1.8494	1.83437	-0.971066	3.39158e-17
Smp_020270	1.96823	1.51133	-0.592681	0.731196	1.44509	1.24811	1.59353	1.57468	0.385113	4.75978	6.0923	-0.961009	4.25031	5.42851	3.73583	7.81845	7.53969	2.1426	3.0836	2.04548	3.76168	-0.970413	1.66262e-13
SmVG_015979:Smp_151540	1.01554	1.70335	-0.982387	0.401619	0.62472	0.292944	1.10371	1.08232	0.269456	2.78982	2.09198	-1.01678	1.33735	2.60836	1.26304	2.77119	2.93422	0.780279	1.60548	0.785695	1.08376	-0.969637	1.73233e-07
SmVG_015979:Smp_192490	1.01554	1.70335	-0.982387	0.401619	0.62472	0.292944	1.10371	1.08232	0.269456	2.78982	2.09198	-1.01678	1.33735	2.60836	1.26304	2.77119	2.93422	0.780279	1.60548	0.785695	1.08376	-0.969637	1.73233e-07
Smp_196950	1.25082	1.81764	-1.93657	0.667641	0.720332	0.454068	2.42121	4.39436	0.37978	1.07533	1.07195	-0.900596	0.942648	1.01487	0.611451	1.13344	1.6624	0.487702	0.596779	0.349375	0.517209	-0.968731	3.70953e-06
Smp_015020	4.97747	7.49726	-1.07012	2.67975	3.87187	2.80865	7.27161	4.83825	1.36746	20.6538	12.072	-1.01946	14.4295	22.7534	11.6305	23.1569	24.6175	7.12063	12.7258	6.24692	7.51934	-0.968092	6.13808e-11
Smp_173340	4.24201	5.62648	-0.608151	2.07207	3.38003	3.40542	4.38665	5.15098	1.07258	9.15199	11.0765	-0.882267	6.31739	9.92273	5.99073	14.3388	10.2788	3.20328	5.66017	3.2594	5.83444	-0.967827	1.58574e-12
SmVG_016350:Smp_063930	2.70745	3.99683	-1.21109	0.917868	1.69953	1.2599	2.98508	3.685	0.515944	6.45558	4.87855	-0.899538	4.0141	6.17888	3.1933	6.03519	6.63502	2.03693	3.58808	1.79409	2.37441	-0.966934	1.71791e-10
SmVG_016350:Smp_156640	2.70745	3.99683	-1.21109	0.917868	1.69953	1.2599	2.98508	3.685	0.515944	6.45558	4.87855	-0.899538	4.0141	6.17888	3.1933	6.03519	6.63502	2.03693	3.58808	1.79409	2.37441	-0.966934	1.71791e-10
Smp_007550	11.7273	12.3392	-1.05597	5.90852	10.1767	9.99632	16.6135	19.0765	3.08923	12.1966	11.407	-0.859664	9.76234	16.3268	9.93893	16.2701	17.2203	4.89285	9.2295	5.4228	7.2676	-0.966887	3.35046e-15
SmVG_025272:Smp_024450	18.0196	19.5702	-0.718238	5.39966	11.743	8.7661	12.7358	16.2164	2.82187	13.7293	10.3919	-0.911142	7.97182	13.177	7.13217	13.4646	13.1289	3.93927	7.45621	3.88292	5.10046	-0.963073	1.02341e-12
SmVG_025272:Smp_135400	18.0196	19.5702	-0.718238	5.39966	11.743	8.7661	12.7358	16.2164	2.82187	13.7293	10.3919	-0.911142	7.97182	13.177	7.13217	13.4646	13.1289	3.93927	7.45621	3.88292	5.10046	-0.963073	1.02341e-12
Smp_128680	5.53287	8.61975	-0.433476	2.42624	3.67621	3.90822	5.56395	4.89863	1.24024	15.1569	15.3349	-0.826824	10.6955	16.0196	11.9039	21.3366	18.5713	5.23134	8.98421	6.33275	8.01275	-0.962302	3.1777e-29
Smp_179690	6.95376	7.32661	-0.867234	3.02874	6.00848	4.35512	8.34519	9.28009	1.65863	6.90237	4.57907	-0.916827	6.3637	8.97763	4.50958	9.50341	9.41517	3.22791	5.2464	2.38385	3.09642	-0.960947	4.42845e-08
Smp_149120	3.6683	4.3968	-0.438041	1.95264	3.10786	3.14444	3.64894	4.46227	1.05347	3.44824	3.16555	-1.09864	2.91114	4.00856	2.84858	5.06738	4.53321	1.49636	2.34057	1.61628	2.0417	-0.955186	9.46485e-18
Smp_052810	14.7007	15.92	-0.658559	9.28164	16.3706	12.4697	17.0956	19.6657	4.89124	16.9088	15.3149	-1.02891	21.0915	28.8848	20.5123	34.6411	37.924	10.7508	16.6478	11.2182	13.8885	-0.954866	5.48018e-24
Smp_154580	25.4035	32.7843	-0.486624	13.9264	16.816	14.1711	21.679	20.6881	7.10331	49.6406	41.867	-0.939078	37.813	49.2149	30.487	58.7743	52.0068	19.0075	28.1427	16.5974	22.0507	-0.950728	1.28912e-17
Smp_053900	141.769	205.898	-1.48733	94.0332	146.801	167.959	312.563	380.893	50.1013	132.912	114.228	-1.05755	142.358	193.682	180.395	245.186	248.391	71.5719	110.063	98.3574	95.9147	-0.950482	2.58246e-16
Smp_199750	4.012	3.62939	-1.05363	2.12839	3.65597	1.87675	4.88421	5.97951	1.18795	5.8823	2.68946	-1.07496	9.31704	9.11557	3.63124	7.89176	10.4395	5.0831	5.66541	2.0194	2.90948	-0.94929	0.0020128
Smp_070310	4.14689	5.1446	-0.550811	1.77205	3.03424	2.4534	3.94852	3.82413	0.929289	7.14785	5.83359	-0.862629	5.3529	7.72399	4.21641	7.65993	8.63709	2.6932	4.36689	2.28697	3.21804	-0.947471	6.06534e-13
Smp_131420	4.20719	6.55003	-1.10472	1.07791	2.38987	2.03372	4.81723	5.03051	0.566109	7.85084	3.18217	-0.886777	3.46959	6.22337	1.91497	5.22923	5.16922	2.20921	3.9644	1.15083	1.53191	-0.947394	0.00125152
Smp_144850	18.1705	26.2742	-0.700783	6.40052	10.4837	9.08866	15.7379	16.3698	3.63686	54.7647	32.7901	-0.906284	28.8014	46.8367	24.0251	45.9045	50.946	14.9151	27.3283	13.652	15.5678	-0.946258	3.5927e-10
Smp_179230	3.04199	4.83333	-0.807993	1.18009	1.88774	1.9142	3.68854	4.01996	0.99276	4.87293	2.5453	-1.08231	2.19498	3.31472	1.85046	4.31425	5.67275	1.99331	3.38705	1.53896	1.59349	-0.945749	0.000105731
Smp_128350	6.44871	7.44999	-0.878875	1.45861	3.89092	3.01265	5.16779	6.39809	0.780038	2.97433	2.99499	-0.885572	1.7723	2.82793	2.69153	3.52632	3.80842	0.898571	1.62276	1.50361	1.45272	-0.94557	2.21657e-08
Smp_111980	32.5257	74.082	-0.944545	20.2986	28.2595	44.4688	105.077	135.879	19.3335	34.9149	87.5547	-0.937358	42.2623	43.9365	81.0925	228.189	209.383	38.1089	44.172	77.7457	97.257	-0.945253	0.000732017
SmVG_002464:Smp_008190	8.88516	11.8121	-1.04476	4.76493	5.81326	4.41183	10.7856	9.2354	2.49886	27.1793	17.5846	-0.90727	16.1311	26.2613	12.8743	25.2931	24.5481	8.05414	14.8005	6.9683	8.98219	-0.945061	1.00828e-09
SmVG_002464:Smp_126600	8.88516	11.8121	-1.04476	4.76493	5.81326	4.41183	10.7856	9.2354	2.49886	27.1793	17.5846	-0.90727	16.1311	26.2613	12.8743	25.2931	24.5481	8.05414	14.8005	6.9683	8.98219	-0.945061	1.00828e-09
SmVG_023228:Smp_114540	5.25448	7.95542	-0.607922	3.15037	3.22621	3.29953	7.22797	6.05965	1.98444	29.3743	27.9254	-0.815721	22.2876	32.4509	17.2892	39.4789	40.6764	13.2395	21.1212	12.3314	16.9441	-0.943419	1.97083e-13
SmVG_023228:Smp_139100	5.25448	7.95542	-0.607922	3.15037	3.22621	3.29953	7.22797	6.05965	1.98444	29.3743	27.9254	-0.815721	22.2876	32.4509	17.2892	39.4789	40.6764	13.2395	21.1212	12.3314	16.9441	-0.943419	1.97083e-13
Smp_133250	6.47481	8.44258	-0.748312	2.55236	2.93881	3.13325	6.0427	4.74406	1.28523	16.7715	15.9576	-0.906567	9.39934	14.2609	9.28931	17.8969	16.3829	4.63934	7.87429	5.188	6.60582	-0.943409	1.90914e-26
Smp_130250	0.988554	2.10644	-2.08135	0.906031	1.1337	1.08095	4.08914	3.63881	0.50606	19.2701	9.06241	-1.15956	11.5161	23.614	9.36212	20.3628	21.5497	6.11956	14.1554	5.48865	6.97061	-0.942465	1.64533e-06
Smp_160820	8.24131	13.3979	-0.605663	4.28741	5.08794	5.16477	9.14471	8.49094	2.32109	15.0363	13.4115	-0.836837	9.92426	14.256	8.69542	16.4324	16.0424	5.15769	8.23222	4.83002	6.53116	-0.941169	6.76565e-20
SmVG_001542:Smp_000820.1	20.3824	27.2074	-0.434298	6.86909	10.8148	10.744	12.8619	14.3366	3.61643	48.3595	54.757	-0.883404	35.541	40.2692	40.6531	58.6089	58.4459	17.8261	22.97	22.1353	23.9472	-0.940276	3.38261e-15
SmVG_001542:Smp_000820.2	20.3824	27.2074	-0.434298	6.86909	10.8148	10.744	12.8619	14.3366	3.61643	48.3595	54.757	-0.883404	35.541	40.2692	40.6531	58.6089	58.4459	17.8261	22.97	22.1353	23.9472	-0.940276	3.38261e-15
SmVG_001542:Smp_114660	20.3824	27.2074	-0.434298	6.86909	10.8148	10.744	12.8619	14.3366	3.61643	48.3595	54.757	-0.883404	35.541	40.2692	40.6531	58.6089	58.4459	17.8261	22.97	22.1353	23.9472	-0.940276	3.38261e-15
Smp_121580	6.19623	8.92741	-0.407929	3.27857	4.69098	3.86409	5.15986	5.97287	1.66641	18.4576	22.931	-0.909094	14.5859	20.6274	16.0189	25.4805	27.9115	7.22361	11.6884	8.63183	12.9168	-0.935649	1.88312e-17
Smp_131490	1.63714	1.93337	-1.3394	0.214893	0.802996	1.10366	2.5357	2.37885	0.180345	1.03382	1.8244	-0.733417	0.55705	1.01124	1.21914	2.49041	1.85661	0.429264	0.752912	0.775481	1.08456	-0.935614	7.28708e-07
Smp_143840	107.75	128.454	-0.573019	71.154	99.2106	75.0484	105.846	113.585	35.5275	178.971	130.689	-0.964091	163.145	241.498	142.811	244.637	256.79	78.6628	133.027	74.5096	90.483	-0.934783	2.09246e-13
SmVG_033807:Smp_062950	26.3143	38.6594	-0.543098	13.8806	14.1378	12.7229	20.526	19.0171	7.39071	46.9001	32.556	-0.951892	24.7993	37.8721	22.6858	39.996	36.5926	12.5806	21.5524	12.682	14.8359	-0.932609	1.49812e-14
SmVG_033807:Smp_156090	26.3143	38.6594	-0.543098	13.8806	14.1378	12.7229	20.526	19.0171	7.39071	46.9001	32.556	-0.951892	24.7993	37.8721	22.6858	39.996	36.5926	12.5806	21.5524	12.682	14.8359	-0.932609	1.49812e-14
Smp_063090	18.4489	17.4998	-0.455994	10.2211	16.2564	11.3169	16.0431	17.9541	5.08964	15.9743	13.0263	-0.88277	16.0994	22.3451	15.18	24.7726	26.5045	7.8511	12.4608	8.02504	9.18316	-0.932602	3.85899e-19
Smp_020480	10.2855	9.01373	-0.956467	2.92379	6.25746	6.25141	8.73156	10.6225	1.53475	5.39856	5.88833	-0.919145	3.9035	5.20117	4.59464	7.78898	6.49057	1.9081	2.95821	2.43893	3.01307	-0.932	1.07765e-21
Smp_157070	20.9051	27.6609	-0.718393	7.94535	13.3531	15.5617	20.9416	20.8572	4.18914	25.3666	20.3355	-0.917848	14.2649	24.0843	18.3161	27.0698	26.5858	7.24877	13.6944	10.1387	10.0658	-0.931594	3.87404e-16
Smp_137370	1.38516	2.54617	-0.717161	0.744957	0.887867	1.00832	1.81208	1.21925	0.430217	16.8082	7.93203	-0.963101	9.59095	18.0461	5.7499	13.391	16.2632	5.35123	11.1768	3.32138	4.90121	-0.931427	0.000443807
SmVG_020340:Smp_091650	19.1618	32.9684	-0.866213	7.70056	11.4051	7.73502	21.565	19.7753	4.04279	63.8984	47.8598	-0.949243	34.2236	53.0641	34.0078	64.718	68.5431	18.5364	33.0408	19.2265	23.5433	-0.931418	8.59432e-15
SmVG_020340:Smp_091660	19.1618	32.9684	-0.866213	7.70056	11.4051	7.73502	21.565	19.7753	4.04279	63.8984	47.8598	-0.949243	34.2236	53.0641	34.0078	64.718	68.5431	18.5364	33.0408	19.2265	23.5433	-0.931418	8.59432e-15
SmVG_029651:Smp_096370	2.40168	3.51305	-0.829583	0.81476	1.47406	1.18566	2.56548	2.22022	0.418358	3.72702	3.49275	-0.911729	2.63721	3.49323	2.80086	4.59991	4.17126	1.28854	1.99014	1.52497	1.69068	-0.930485	6.40013e-24
SmVG_029651:Smp_173270	2.40168	3.51305	-0.829583	0.81476	1.47406	1.18566	2.56548	2.22022	0.418358	3.72702	3.49275	-0.911729	2.63721	3.49323	2.80086	4.59991	4.17126	1.28854	1.99014	1.52497	1.69068	-0.930485	6.40013e-24
SmVG_029651:Smp_175050	2.40168	3.51305	-0.829583	0.81476	1.47406	1.18566	2.56548	2.22022	0.418358	3.72702	3.49275	-0.911729	2.63721	3.49323	2.80086	4.59991	4.17126	1.28854	1.99014	1.52497	1.69068	-0.930485	6.40013e-24
Smp_014670	24.2708	31.7674	-0.634165	13.8074	18.5179	15.5743	23.6211	22.8559	6.69819	41.7414	43.3888	-0.926543	37.3148	46.1983	35.5069	60.3218	57.9684	17.5612	25.0826	17.9792	23.7646	-0.930124	1.63803e-25
SmVG_029796:Smp_133360	5.21573	6.53344	-0.761476	2.1324	4.0895	2.43759	4.33289	4.98239	1.11151	9.13976	4.95702	-0.93402	6.89481	10.9689	4.90636	9.50693	10.3167	3.53477	6.1594	2.57292	3.34629	-0.929681	7.36293e-07
SmVG_029796:Smp_133370	5.21573	6.53344	-0.761476	2.1324	4.0895	2.43759	4.33289	4.98239	1.11151	9.13976	4.95702	-0.93402	6.89481	10.9689	4.90636	9.50693	10.3167	3.53477	6.1594	2.57292	3.34629	-0.929681	7.36293e-07
Smp_046280	6.05614	7.94903	-1.04305	2.62097	4.87069	4.81097	7.72583	10.0462	1.29859	2.64371	1.87648	-1.06522	1.7015	3.1011	1.61541	2.64554	2.82643	0.758673	1.73637	0.93501	1.17865	-0.929552	1.26666e-06
Smp_017420	11.8887	21.2945	-1.03817	3.85777	8.70874	7.78865	20.5561	21.0326	2.174	24.7619	22.9996	-0.71461	16.0841	31.0249	20.9667	33.8986	37.7625	8.47113	18.378	11.9768	13.3538	-0.929307	5.6761e-13
Smp_118190	20.4418	21.3382	-0.967784	9.56139	25.761	23.4268	46.8059	54.3638	5.08841	9.61481	5.87109	-1.00104	12.2904	20.8492	9.03785	23.087	19.9798	7.10981	16.2573	5.9921	5.78863	-0.928781	0.000834314
Smp_133420	3.88102	4.57927	-0.64554	1.39938	2.38132	2.07567	3.17659	3.47478	0.739017	8.01294	7.57779	-0.86297	5.55802	7.41656	4.36785	8.80767	8.0185	2.81655	4.2265	2.39873	3.65322	-0.927139	3.45663e-15
Smp_136800	5.06091	5.67919	-1.17081	1.51787	2.63491	3.0254	5.59669	6.19944	0.861146	6.17703	7.28914	-0.904253	4.45885	4.98411	3.79335	8.51778	7.30655	2.50144	3.12218	2.26495	3.22483	-0.92691	6.18606e-18
Smp_007760	9.01141	12.0661	-1.19927	11.5853	11.3391	13.9905	21.6238	24.0618	5.77212	30.423	19.9509	-1.00821	39.4109	51.2121	27.7455	55.4457	57.4464	19.0798	28.511	14.6732	19.0378	-0.924901	8.18097e-12
SmVG_031466:Smp_070630	6.0511	8.88781	-0.74511	3.10932	3.44218	2.82446	5.73098	5.12722	1.68219	31.5941	21.7673	-0.870081	17.7456	26.8191	14.4927	25.8674	27.3304	9.34701	15.9588	8.06232	10.3378	-0.922558	8.84612e-10
SmVG_031466:Smp_070640	6.0511	8.88781	-0.74511	3.10932	3.44218	2.82446	5.73098	5.12722	1.68219	31.5941	21.7673	-0.870081	17.7456	26.8191	14.4927	25.8674	27.3304	9.34701	15.9588	8.06232	10.3378	-0.922558	8.84612e-10
SmVG_008369:Smp_147760	4.38828	5.24534	-0.640403	2.2418	3.34803	2.94408	4.14118	4.75958	1.15168	5.69264	6.36371	-0.892138	5.0359	6.26624	4.52165	7.61004	8.044	2.48052	3.55657	2.4125	3.39136	-0.921567	2.11417e-20
SmVG_008369:Smp_147770	4.38828	5.24534	-0.640403	2.2418	3.34803	2.94408	4.14118	4.75958	1.15168	5.69264	6.36371	-0.892138	5.0359	6.26624	4.52165	7.61004	8.044	2.48052	3.55657	2.4125	3.39136	-0.921567	2.11417e-20
SmVG_035383	2.84363	2.50254	-1.06284	1.69471	2.63696	1.40401	3.78288	3.90191	0.822054	3.06483	2.06189	-1.00292	2.71589	4.3112	1.66256	3.45367	3.36751	1.30304	2.55312	0.899525	1.67075	-0.917664	0.00073302
Smp_164760	6.72047	9.1545	-0.518089	3.02858	4.66932	3.02149	5.185	4.5056	1.53827	16.8714	13.3377	-0.884595	10.9433	17.333	13.3676	19.7778	19.5355	5.22042	9.50725	6.9716	6.83264	-0.91731	1.11014e-16
SmVG_035941	14.3294	18.7339	-0.758099	5.27987	7.32312	6.67896	12.471	13.6295	2.81531	39.6638	36.7797	-0.785278	22.6023	31.2079	23.7573	45.8123	36.0478	11.9259	18.2521	13.1173	15.4993	-0.913278	1.2407e-23
Smp_144610	9.21536	15.3616	-0.986033	3.42276	6.74802	9.45983	13.6112	11.6336	1.88249	20.9368	12.0423	-0.955378	17.8573	23.8389	8.8477	21.4102	22.3697	9.25107	13.7044	5.24897	7.67595	-0.91283	3.51849e-05
Smp_194760	32.0864	43.9035	-0.827722	13.1402	21.3929	13.5215	28.7488	32.3457	6.90174	56.4054	37.8022	-0.876854	34.3509	55.8169	28.605	53.3545	54.3089	17.2101	31.7121	15.5047	19.4537	-0.911656	4.546e-11
Smp_213430	3.84549	4.11155	-1.79761	0.983598	2.36969	2.18189	6.55209	8.63857	0.757565	9.23142	5.90489	-0.919033	5.93992	8.57747	4.47835	10.3387	10.6997	3.74038	5.95284	2.81939	3.97143	-0.911161	4.34587e-08
Smp_018640	2.73222	3.15338	-0.519781	1.23061	2.29331	2.0076	2.76926	2.16053	0.628575	4.00312	3.38661	-0.81327	3.50068	5.01269	3.98381	6.42431	5.55093	1.74559	2.83653	2.1654	2.26174	-0.911023	9.32055e-17
Smp_166170	4.1987	7.83986	-0.862964	1.97144	3.46667	4.83465	4.75453	5.08813	0.926557	3.39343	4.25157	-1.107	2.72152	4.01379	4.3234	5.12065	5.35994	1.27669	2.13332	2.19593	2.67575	-0.910112	1.63196e-09
Smp_004190	19.4268	25.7872	-0.484223	11.7859	14.1687	13.602	17.8727	18.3693	5.80949	26.9733	32.791	-0.850687	25.663	30.772	29.6367	40.2845	45.4846	12.1821	16.5784	15.225	18.085	-0.905828	1.12911e-15
Smp_137650	14.1244	15.7896	-0.819671	4.89239	10.273	9.01289	13.9406	15.7112	2.52036	16.1456	11.8363	-0.901983	11.0053	17.359	9.69095	17.5075	17.1365	5.39789	9.69145	5.12465	6.81819	-0.903504	3.30565e-14
Smp_168520	14.0746	17.8744	-0.644066	6.87973	10.3323	8.25568	13.2358	14.292	3.52586	24.6057	18.3992	-0.853212	17.2186	26.7093	15.2609	26.7555	26.052	8.48636	14.9485	8.18199	10.4692	-0.90072	2.15326e-14
Smp_070940	35.5744	50.4965	-1.59103	10.4513	19.5022	15.8435	48.5999	55.303	6.5711	59.7699	36.711	-0.914727	31.0717	47.7602	23.1094	56.7093	55.5233	18.1693	31.1721	11.976	17.5847	-0.899999	5.73393e-07
Smp_127940	13.5806	19.4443	-0.740429	4.67993	8.21098	6.16168	12.3212	12.676	2.47018	32.6452	26.0097	-0.849929	18.7874	30.3429	18.8551	31.0302	30.4768	9.41689	17.1678	10.2053	12.4773	-0.899722	1.69937e-16
Smp_136550	26.8744	28.1966	-0.315612	9.54264	18.1478	13.6264	15.0813	15.8484	4.76888	20.5642	14.1513	-0.818364	13.1618	20.4856	10.1582	18.8076	19.3758	6.4005	11.3892	5.34536	6.83961	-0.894615	7.5032e-10
Smp_175140	7.81078	10.1111	-0.602097	4.296	6.09971	6.09293	8.24246	8.61423	2.39477	9.16106	6.35665	-0.932771	3.23081	9.60305	3.23815	7.39558	8.0194	1.82989	5.91085	1.79397	3.85174	-0.890628	0.00194955
Smp_170510	16.6581	21.0943	-0.905292	6.6063	10.3437	7.04934	16.6266	17.6523	3.41925	26.5052	19.0788	-0.850919	15.6134	25.0846	14.1859	24.4358	24.2491	7.72801	14.0123	7.59023	9.32303	-0.888846	4.94891e-12
Smp_203190	10.4228	15.1617	-0.65769	4.9757	5.95082	3.38659	8.18486	8.22196	2.69884	40.0817	50.4868	-0.854061	25.9957	34.6503	37.5153	54.182	47.0139	13.3221	19.936	20.8953	23.5042	-0.8883	5.59134e-11
Smp_082360	12.6108	19.635	-0.367545	3.76474	4.6451	2.65053	9.15474	7.80099	2.90365	52.5785	36.6814	-0.785477	20.5335	34.474	13.023	41.9493	41.2088	13.981	24.5647	14.184	15.4178	-0.888123	1.05831e-09
Smp_005060	15.5501	19.348	-0.398823	8.82195	12.0919	10.0618	17.3597	21.9762	5.59144	12.7442	9.76168	-0.857603	11.4434	16.6139	10.0423	22.4417	21.4283	7.24724	12.0621	7.19211	7.93878	-0.886919	2.86729e-12
Smp_130620	3.27919	4.37331	-0.613295	1.35654	2.38575	1.56547	2.96028	2.89716	0.704306	15.455	9.47959	-0.840988	9.28695	16.3928	9.30194	14.5464	14.2756	4.43994	9.07124	4.86266	5.11067	-0.88624	2.08453e-09
Smp_012440	100.966	148.852	-0.68498	28.3909	51.9237	39.2119	75.3911	88.2249	14.9285	317.628	178.447	-0.839297	153.671	256.069	106.377	216.589	215.022	76.7679	144.878	57.481	75.9002	-0.8817	3.93397e-06
SmVG_022170:Smp_134590	6.88672	7.52732	-0.564713	2.47205	5.2495	3.04605	4.67713	6.54991	1.21903	2.11737	2.48894	-0.865287	1.95613	2.2941	1.93928	2.92849	3.21303	0.972281	1.30514	1.00009	1.45286	-0.88129	7.78005e-12
SmVG_022170:Smp_134600	6.88672	7.52732	-0.564713	2.47205	5.2495	3.04605	4.67713	6.54991	1.21903	2.11737	2.48894	-0.865287	1.95613	2.2941	1.93928	2.92849	3.21303	0.972281	1.30514	1.00009	1.45286	-0.88129	7.78005e-12
Smp_046290	181.947	237.649	-0.517238	81.9841	118.207	110.587	144.158	162.377	42.3256	212.357	225.557	-0.805075	165.638	212.72	193.324	274.146	267.053	80.7096	116.47	102.606	111.475	-0.87973	1.41248e-17
SmVG_011237:Smp_013970	6.1824	5.98644	-1.11134	1.69446	4.42506	3.88567	7.61858	8.69096	0.888329	2.044	1.80199	-0.852451	1.28975	2.17476	1.28068	2.16138	2.22846	0.642021	1.23034	0.701795	0.964191	-0.873655	2.99849e-07
SmVG_011237:Smp_129710	6.1824	5.98644	-1.11134	1.69446	4.42506	3.88567	7.61858	8.69096	0.888329	2.044	1.80199	-0.852451	1.28975	2.17476	1.28068	2.16138	2.22846	0.642021	1.23034	0.701795	0.964191	-0.873655	2.99849e-07
Smp_125200	2.31017	3.37384	-0.866447	0.991369	1.21193	1.07281	2.29447	2.43208	0.615699	12.1757	10.643	-0.845456	5.95997	9.61312	6.20913	10.9451	10.0364	3.2066	5.6532	3.43563	4.62173	-0.873126	2.30961e-14
Smp_153700	14.4212	21.2179	-0.350064	7.61612	8.6589	6.71441	9.17179	9.72177	3.79602	61.7834	48.5943	-0.869091	39.8794	54.7174	32.8976	54.3473	58.6148	19.3017	30.4129	17.2512	22.1746	-0.872077	2.50739e-13
Smp_038870	47.3895	49.6842	-0.526714	20.7297	33.2475	25.4309	34.2608	40.7553	10.1562	35.8605	26.1744	-0.881748	24.3345	38.037	23.5122	36.1513	38.0025	11.4622	20.5141	12.1522	14.5199	-0.871866	2.098e-14
Smp_169960	17.9808	26.2135	-0.348828	11.2011	13.2419	9.97814	15.2877	14.2401	5.66679	32.1012	23.8714	-0.850672	25.4843	33.6563	21.404	35.852	32.3576	12.4652	18.9033	11.4525	12.596	-0.866811	9.9616e-13
Smp_157340	9.76232	11.3996	-0.982529	3.24082	6.56053	4.35065	8.94981	10.4764	1.6649	10.9793	8.90853	-0.850094	7.36552	11.409	5.27944	10.9259	10.8257	3.57955	6.35162	2.76616	4.61452	-0.866237	1.11541e-09
Smp_022400	190.964	182.686	-0.682445	108.963	168.269	152.234	194.231	255.278	55.9147	79.0709	75.748	-0.823581	86.5263	105.88	74.3213	122.276	122.982	42.2229	58.7934	39.1115	49.6373	-0.865553	4.61329e-18
Smp_021950	29.8863	31.8637	-1.02694	12.8585	24.8911	18.2331	33.8424	36.1825	6.66065	34.8524	17.7103	-0.87706	24.848	42.796	14.5185	30.9542	31.8142	12.1151	23.9466	7.79846	11.0315	-0.863208	0.000360143
Smp_179870	7.77329	8.14178	-0.589334	4.66659	8.31277	7.22219	11.1024	11.24	2.81504	10.6641	6.11589	-0.777418	7.96372	15.7702	8.82695	15.7455	15.0053	4.54131	9.53957	4.93768	5.01897	-0.863134	9.58249e-08
Smp_128750	4.04151	5.72093	-0.341141	2.37144	3.56952	2.92761	3.53024	3.99745	1.26282	4.74613	3.52257	-0.857563	3.57656	5.29479	3.56136	5.41024	5.8224	1.81007	3.01443	1.96311	2.22865	-0.862109	2.70409e-15
Smp_062980	81.9875	97.453	-0.551939	19.79	28.0656	21.6245	54.0137	57.6116	15.3996	123.243	98.8797	-0.809537	45.5356	75.6363	37.0841	104.284	102.575	32.9463	55.7779	35.5024	41.3518	-0.862094	3.97948e-18
SmVG_035501	3.65608	6.13246	-0.718081	3.22715	2.51842	4.11084	5.43509	4.85185	1.81455	15.2949	12.2854	-0.913794	10.5255	14.605	11.2113	16.9193	17.442	5.70954	9.05171	6.25269	6.69733	-0.861486	7.57203e-18
Smp_163950	7.86019	8.67824	-0.789119	2.50652	4.32199	3.023	6.36825	7.46529	1.33414	20.1668	15.7489	-0.807646	12.306	18.0544	9.89747	17.796	18.8132	6.15978	10.2567	5.32428	7.24086	-0.859078	2.31212e-12
Smp_134140	3.44702	5.50362	-1.06348	1.7035	2.05839	2.05974	5.43867	4.98704	1.06612	18.507	18.5103	-0.763606	14.5497	16.6259	9.13198	21.7948	23.363	8.09562	11.2869	7.36152	10.0445	-0.855348	5.61393e-15
Smp_126180	8.95547	10.8956	-0.961415	6.09733	7.46473	7.0837	12.1728	11.9254	3.11707	22.2189	17.0242	-0.885136	15.996	25.3544	14.0032	23.1695	23.6168	7.70621	14.3167	7.24341	9.68557	-0.854572	1.24686e-09
Smp_123230	12.7146	22.0677	-0.794885	6.1621	10.7029	13.4514	18.2841	24.989	3.36874	22.122	22.752	-0.910334	15.5189	26.8756	20.9694	34.454	34.3216	8.02213	15.5806	11.403	15.3997	-0.851956	1.33837e-12
Smp_077720	57.5992	76.4027	-0.454911	21.6255	36.0149	20.6124	42.6222	43.7635	12.1027	179.918	148.978	-0.68958	119.573	182.336	125.811	199.464	203.129	63.1991	107.095	72.0239	79.2417	-0.851417	2.10094e-17
Smp_097180	10.9752	12.3664	-0.823013	5.70967	11.3032	6.20109	13.4201	14.8687	2.81002	11.1464	9.33128	-0.701231	13.6868	17.1516	9.06294	18.4444	17.1135	6.73576	9.79541	5.04023	7.78509	-0.850225	1.66981e-10
Smp_042140	50.2552	76.8978	-1.54156	24.8974	46.0453	30.5458	93.5174	103.209	13.4517	98.1088	68.6696	-0.917611	62.0642	121.018	75.05	115.691	115.484	31.7116	70.1986	41.9295	45.7698	-0.849553	3.2633e-11
Smp_174190	0.669143	0.701617	-1.09436	0.376961	0.548178	0.786424	1.22831	1.11204	0.205417	1.30021	1.65935	-0.906228	1.84033	2.35154	1.16866	2.79917	2.51451	0.95388	1.41342	0.659498	1.14561	-0.848313	8.41423e-07
Smp_131080	3.77579	4.51214	-0.767768	3.31818	4.2302	3.88578	4.73064	6.27749	1.75769	8.88398	6.62294	-0.776475	10.7167	15.3054	12.6533	16.8952	18.4337	5.54074	8.86839	7.02449	6.54496	-0.846479	7.08975e-11
Smp_020070	12.3055	28.5334	-1.68627	5.4827	8.3362	6.86043	29.251	25.5434	2.99098	103.558	48.449	-0.826339	48.6979	107.432	44.3353	79.7152	84.5357	25.0004	62.1782	24.5621	28.5365	-0.845507	3.97443e-05
Smp_078280	2.05223	2.14601	-0.610024	0.835069	1.57772	0.907508	1.94173	2.0457	0.429786	2.89568	2.13609	-0.779999	1.91005	3.20269	1.50083	3.55202	3.09636	1.061	1.98277	0.943652	1.44851	-0.844187	1.71885e-08
SmVG_002045:Smp_119170	4.02104	5.47593	-0.638313	1.99875	2.64671	1.88776	3.17288	3.73654	0.991459	6.97656	3.93202	-0.813321	4.75252	6.57964	2.7222	4.84648	5.26509	2.36523	3.65245	1.4322	1.90642	-0.843577	0.000293928
SmVG_002045:Smp_160960	4.02104	5.47593	-0.638313	1.99875	2.64671	1.88776	3.17288	3.73654	0.991459	6.97656	3.93202	-0.813321	4.75252	6.57964	2.7222	4.84648	5.26509	2.36523	3.65245	1.4322	1.90642	-0.843577	0.000293928
SmVG_002045:Smp_160970	4.02104	5.47593	-0.638313	1.99875	2.64671	1.88776	3.17288	3.73654	0.991459	6.97656	3.93202	-0.813321	4.75252	6.57964	2.7222	4.84648	5.26509	2.36523	3.65245	1.4322	1.90642	-0.843577	0.000293928
SmVG_000011:Smp_173020	1.8251	1.88096	-0.934034	0.614558	1.25574	0.841148	1.5392	1.65217	0.342436	2.20259	2.03511	-0.906326	1.40077	2.08572	1.24746	2.64603	2.49237	0.736593	1.34581	0.739619	1.19911	-0.842564	4.43435e-10
SmVG_000011:Smp_200370	1.8251	1.88096	-0.934034	0.614558	1.25574	0.841148	1.5392	1.65217	0.342436	2.20259	2.03511	-0.906326	1.40077	2.08572	1.24746	2.64603	2.49237	0.736593	1.34581	0.739619	1.19911	-0.842564	4.43435e-10
Smp_199810	2.42452	3.11709	-0.997962	0.700638	1.43423	1.63589	2.40841	2.66636	0.347819	4.1186	4.29918	-0.817138	3.3961	3.5947	2.47155	4.21846	4.81739	1.76989	2.10773	1.31216	2.08906	-0.839641	1.40672e-06
Smp_030370	533.282	702.431	-1.02564	332.533	442.096	545.903	852.924	929.447	167.174	735.209	820.744	-0.869562	633.244	838.498	851.062	1079.15	1065.55	306.042	460.165	437.034	460.982	-0.839079	9.79919e-12
SmVG_018800:Smp_154560	10.9381	12.8687	-0.623073	4.32164	8.06538	7.2741	10.1707	10.9953	2.21104	13.1116	11.5163	-0.771057	9.36841	13.995	9.00848	14.4683	15.5161	4.61444	7.82516	4.81389	6.42723	-0.838429	4.27094e-16
SmVG_018800:Smp_193460	10.9381	12.8687	-0.623073	4.32164	8.06538	7.2741	10.1707	10.9953	2.21104	13.1116	11.5163	-0.771057	9.36841	13.995	9.00848	14.4683	15.5161	4.61444	7.82516	4.81389	6.42723	-0.838429	4.27094e-16
Smp_033330	17.9642	20.3431	-0.728468	10.7861	14.3635	13.4777	18.9941	16.7303	5.46315	30.9545	27.7384	-0.949814	35.3016	40.5718	27.8784	49.9179	41.2991	17.5358	23.1227	14.87	19.0652	-0.836803	9.41824e-13
SmVG_031551	5.78274	7.82835	-0.457855	3.42764	4.21298	3.62948	4.73294	5.12544	1.74951	23.9743	23.634	-0.866196	17.6952	23.7766	18.1041	30.0097	25.4973	8.74416	13.3565	9.72708	12.2315	-0.834723	4.89793e-25
Smp_176480	1.5664	1.6015	-0.986926	0.95579	1.36458	1.08508	1.8222	2.27121	0.545976	4.76804	3.05715	-0.86162	3.65245	5.32232	1.75851	4.24467	4.66634	1.97873	3.13949	1.02688	2.14886	-0.83151	0.00119407
Smp_199160	20.0461	24.612	-1.16715	8.10446	17.2735	20.5791	33.3338	36.558	4.00971	21.6751	23.5916	-0.608221	18.885	27.1411	24.1535	35.0319	32.5467	9.19161	15.1321	12.3508	14.8954	-0.83017	9.38741e-17
Smp_076960	4.39338	5.49891	-0.526666	1.52785	2.89882	2.49629	3.70088	3.91159	0.807713	7.4202	5.28086	-0.834967	5.44185	7.57872	4.40158	7.55083	7.62509	2.70377	4.32487	2.41444	2.91297	-0.82929	8.89256e-11
SmVG_014595:Smp_210600	8.72471	12.4317	-1.13866	2.94973	4.96356	3.25084	9.99528	11.2112	1.66221	22.6691	11.6448	-0.753976	9.6686	20.1079	8.81086	16.7547	16.0312	5.11945	12.0286	5.25018	5.70347	-0.828774	2.84475e-05
SmVG_014595:Smp_210610	8.72471	12.4317	-1.13866	2.94973	4.96356	3.25084	9.99528	11.2112	1.66221	22.6691	11.6448	-0.753976	9.6686	20.1079	8.81086	16.7547	16.0312	5.11945	12.0286	5.25018	5.70347	-0.828774	2.84475e-05
Smp_168240	1.76611	2.56225	-0.660989	1.33634	1.05578	0.769091	1.61492	1.47223	0.723464	10.6582	8.12814	-0.788146	6.54919	9.46664	4.08196	8.56832	9.01637	3.43531	5.59641	2.33799	3.84594	-0.827474	2.50962e-06
Smp_178940	20.5653	24.3511	-0.532209	6.41629	10.7168	5.9228	10.3838	14.9548	4.06088	13.5653	6.8286	-0.827484	5.94921	10.7188	5.78035	10.3609	11.1552	3.28425	6.94162	3.6498	3.44963	-0.825995	2.34209e-07
Smp_199120	6.97315	9.24896	-0.760629	3.73055	6.29122	5.92362	9.27814	9.47881	1.97937	13.6025	9.73527	-0.86934	10.7862	18.1424	9.32511	17.2916	17.8055	5.65938	10.8326	5.34825	7.00995	-0.820658	2.56805e-10
Smp_020300	7.38026	8.73424	-0.470455	3.71748	5.66511	4.0074	6.32993	6.1215	1.8734	13.0537	10.5647	-0.791267	10.5097	14.8581	8.22673	16.0989	13.4193	5.12346	8.26547	4.30867	6.17638	-0.820156	6.37669e-11
SmVG_007105:Smp_087750	7.01988	9.39643	-0.551043	2.99289	4.73549	4.3608	6.44043	6.12854	1.73007	16.1634	15.8103	-0.746432	12.0863	15.8061	11.6077	18.1534	17.3878	6.01018	9.01517	6.2366	7.90347	-0.819402	6.92144e-20
SmVG_007105:Smp_169900.1	7.01988	9.39643	-0.551043	2.99289	4.73549	4.3608	6.44043	6.12854	1.73007	16.1634	15.8103	-0.746432	12.0863	15.8061	11.6077	18.1534	17.3878	6.01018	9.01517	6.2366	7.90347	-0.819402	6.92144e-20
SmVG_007105:Smp_169900.2	7.01988	9.39643	-0.551043	2.99289	4.73549	4.3608	6.44043	6.12854	1.73007	16.1634	15.8103	-0.746432	12.0863	15.8061	11.6077	18.1534	17.3878	6.01018	9.01517	6.2366	7.90347	-0.819402	6.92144e-20
Smp_153550	67.5568	83.4235	-0.685886	28.419	37.2896	44.0907	63.5822	61.7766	16.4311	191.665	221.315	-0.81835	117.031	161.744	163.267	215.258	214.633	61.6967	95.9698	93.9782	102.065	-0.817025	5.69346e-10
Smp_130520	72.4921	93.5649	-0.564805	27.3365	53.398	38.2295	60.7011	67.0938	14.0013	59.6348	48.8311	-0.823762	45.5244	65.8465	41.0831	67.1002	65.25	22.4335	36.7461	21.8649	26.7629	-0.814392	4.60148e-15
Smp_146700	7.52976	11.6359	-0.779817	3.20277	4.43162	3.86397	7.41565	7.0553	1.57193	22.2254	13.3515	-0.699604	13.0356	19.5401	10.9663	17.6201	16.517	5.95985	10.8069	5.54761	5.91165	-0.81162	8.54063e-08
Smp_174540	4.47749	7.04793	-0.427087	3.05192	3.57892	2.97573	4.31555	5.48715	1.6411	12.7495	10.7076	-0.870765	8.90149	14.1264	9.9519	16.2275	16.2867	4.64354	8.19559	5.63065	6.79767	-0.810219	1.0546e-15
SmVG_007994:Smp_148390	7.27312	6.46642	-0.549183	2.42285	4.45469	5.44945	6.16067	6.60829	1.23944	4.94825	4.99502	-0.730314	3.64629	5.20824	4.14369	6.36607	5.65542	1.81587	3.01421	2.25744	2.65042	-0.809368	1.39738e-21
SmVG_007994:Smp_148400	7.27312	6.46642	-0.549183	2.42285	4.45469	5.44945	6.16067	6.60829	1.23944	4.94825	4.99502	-0.730314	3.64629	5.20824	4.14369	6.36607	5.65542	1.81587	3.01421	2.25744	2.65042	-0.809368	1.39738e-21
Smp_083430	15.7842	35.1465	-0.859414	2.40886	8.28618	13.1722	16.8814	18.5419	1.20097	11.8486	21.7773	-0.609297	5.43217	9.66636	12.3321	14.3175	12.7167	2.79326	5.74615	6.92429	9.14914	-0.805582	0.00095361
Smp_088950	21.244	27.7791	-1.02277	7.84328	15.1514	17.1514	30.9585	30.5058	4.07846	21.13	20.5502	-0.730965	15.9472	23.0985	16.9074	24.358	24.6858	7.93539	13.0219	9.13261	11.5542	-0.805532	2.31526e-19
Smp_095620	80.2778	96.6421	-0.459415	33.3282	63.4646	45.451	58.5216	77.5766	17.3846	71.1986	51.1503	-0.713339	51.2111	78.0078	39.1544	69.4948	66.2688	25.5069	44.1935	21.2351	28.9575	-0.805242	1.39398e-07
Smp_158820	5.20836	6.50275	-0.847228	2.0422	3.50853	2.77843	5.32505	5.42842	1.04655	12.9834	9.38062	-0.775747	8.78367	12.6658	6.35348	12.2395	12.2002	4.42918	7.34437	3.67405	5.01572	-0.803753	1.92313e-09
Smp_174410	9.41293	9.27186	-0.558104	3.65016	6.47971	8.06646	8.65401	8.40179	1.89822	9.03531	11.6454	-0.651379	6.9762	9.84389	8.27308	14.2996	11.8811	3.45297	5.49809	4.41081	6.33254	-0.803416	4.48835e-10
Smp_205600	35.303	62.5521	-0.839458	21.17	37.4909	46.0361	106.929	131.205	17.5853	14.7068	25.0665	-0.840023	20.4464	22.1715	33.5426	65.2782	61.64	16.4917	19.2355	26.155	27.8729	-0.801418	1.42328e-05
Smp_006920	8.17292	9.03901	-0.343231	5.16948	8.28674	6.3145	9.75575	9.83013	2.80358	15.2445	13.7161	-0.740892	11.653	16.1075	9.604	16.924	15.3996	5.64627	8.91129	5.0418	7.36094	-0.80129	1.16555e-14
SmVG_023957:Smp_159420	1.42599	1.95963	-0.744125	0.642856	1.04193	1.28437	2.05623	1.69266	0.313804	4.17642	3.01109	-0.764655	3.60187	4.85515	2.93759	4.67277	4.29394	1.72584	2.6424	1.50629	1.69275	-0.79954	5.59388e-09
SmVG_023957:Smp_179370	1.42599	1.95963	-0.744125	0.642856	1.04193	1.28437	2.05623	1.69266	0.313804	4.17642	3.01109	-0.764655	3.60187	4.85515	2.93759	4.67277	4.29394	1.72584	2.6424	1.50629	1.69275	-0.79954	5.59388e-09
Smp_163570	5.39918	7.315	-0.382995	3.91052	5.15558	6.38377	5.72852	6.43617	1.96272	13.3622	29.2069	-0.793647	21.0743	17.987	25.3304	36.953	37.8851	10.0843	9.85725	13.1928	19.4308	-0.796171	0.000164957
Smp_159900	11.9145	13.4725	-0.48419	9.96895	14.4318	12.0599	15.5887	16.1722	4.90907	14.9309	12.1316	-0.832486	22.7613	25.8486	19.0353	30.9796	27.2737	10.7108	14.1354	10.2092	11.7622	-0.795684	4.71602e-15
Smp_000320	9.43304	11.1135	-0.47602	9.12954	9.28805	7.55167	14.3948	12.8325	4.93058	23.8906	21.9265	-0.62257	32.3136	44.1517	26.6488	45.9678	46.212	16.8471	25.992	14.9735	20.2918	-0.795613	4.44209e-13
Smp_143310	1.91662	3.42584	-1.00574	0.988342	1.14129	1.1266	2.51249	3.35148	0.60116	5.65134	5.68485	-0.661713	3.73571	5.59388	3.04168	5.72995	5.73083	1.97896	3.24678	1.74957	2.9836	-0.79543	1.33516e-06
Smp_132320	4.39945	4.59118	-0.79353	1.5201	3.10313	2.34489	3.75208	4.80795	0.824387	10.4958	9.61267	-0.743377	7.02442	10.6761	8.11496	12.0782	11.4058	3.54815	6.17146	4.39105	5.25117	-0.793092	2.70306e-16
Smp_126540	5.81765	9.57449	-0.490912	3.18901	4.31017	4.37127	6.86763	6.90713	1.64197	26.9109	31.2416	-0.773743	23.2055	31.1222	25.1583	39.3553	38.7257	11.1875	17.1801	13.1562	18.4317	-0.790703	4.28119e-13
Smp_033040	6.12259	7.2591	-0.633421	3.42651	3.61622	2.84367	4.32619	5.2287	1.80285	29.8769	28.7586	-0.759562	18.8267	25.92	21.709	29.0505	30.5242	9.36057	14.7313	11.6901	13.0745	-0.790418	3.01908e-16
Smp_177280	4.38834	4.26027	-0.864298	2.08622	4.52642	3.61436	5.67935	6.15951	1.0362	8.30731	6.20863	-0.741552	8.41529	12.1279	6.31189	11.275	11.5785	4.12751	6.72401	3.34494	4.61842	-0.788296	1.94285e-08
SmVG_022298:Smp_118970	10.4694	11.4289	-0.3934	3.60589	6.10101	4.37641	6.88316	6.88271	2.07092	13.4491	12.647	-0.76114	8.30025	12.0535	8.82167	14.5697	13.7085	4.41959	7.20557	4.98599	5.98607	-0.787499	3.88546e-19
SmVG_022298:Smp_173940	10.4694	11.4289	-0.3934	3.60589	6.10101	4.37641	6.88316	6.88271	2.07092	13.4491	12.647	-0.76114	8.30025	12.0535	8.82167	14.5697	13.7085	4.41959	7.20557	4.98599	5.98607	-0.787499	3.88546e-19
Smp_054770	3.44033	3.50956	-0.579111	1.46229	3.58336	3.49923	3.98897	4.73197	0.76328	1.72596	1.63172	-0.723633	1.71534	2.47481	1.97397	2.81044	2.56935	0.770315	1.3513	0.964593	1.2572	-0.787487	1.30308e-10
Smp_006040	180.777	180.358	-0.409942	65.3546	94.5246	59.9847	95.4431	103.886	36.0862	277.385	229.779	-0.763054	153.285	227.773	185.196	277.306	258.014	80.8186	136.663	106.371	105.339	-0.786574	1.92806e-15
SmVG_024377:Smp_163920	4.75898	5.28518	-0.59343	2.25266	3.45286	3.19079	4.62047	4.45925	1.18695	6.99565	7.79041	-0.776662	5.67327	7.71707	5.37037	8.8898	8.49362	2.81943	4.34379	2.92197	4.47701	-0.785505	7.78661e-16
SmVG_024377:Smp_188590	4.75898	5.28518	-0.59343	2.25266	3.45286	3.19079	4.62047	4.45925	1.18695	6.99565	7.79041	-0.776662	5.67327	7.71707	5.37037	8.8898	8.49362	2.81943	4.34379	2.92197	4.47701	-0.785505	7.78661e-16
Smp_013040	165.754	225.431	-0.924286	102.16	129.002	135.56	248.647	251.31	55.906	140.709	122.725	-0.780644	122.961	184.423	143.874	199.536	206.908	65.6964	113.4	80.5731	77.21	-0.784573	5.50457e-11
Smp_129170	1.66843	3.48359	-1.31806	0.803255	1.12736	0.714547	2.66332	2.3534	0.424799	9.68121	5.41109	-0.800611	4.29112	9.63716	3.47101	7.49757	6.76009	2.30864	5.67987	1.94443	2.84715	-0.782485	0.000586234
Smp_027430	2.32441	2.02193	-0.624603	1.64977	2.33052	1.86016	2.84844	2.89265	0.894922	6.47371	5.42852	-0.881491	7.84982	9.3507	6.46594	11.5405	10.1483	4.00624	5.36456	3.66803	4.68681	-0.781326	6.03963e-11
Smp_138750	9.84778	11.7614	-1.17597	3.24851	5.72972	3.92522	9.03083	10.3216	1.73092	18.6916	16.3227	-0.754531	10.3256	16.9923	14.0044	18.122	18.8206	5.33177	10.1353	7.95242	7.94539	-0.7813	1.7916e-10
Smp_149910	5.04371	6.67935	-0.518856	2.02864	3.46638	2.40697	4.31125	3.76821	1.05765	11.6253	9.79275	-0.736633	7.30329	11.7551	5.99963	10.8407	10.551	3.5957	6.54826	3.20339	5.06829	-0.78096	2.68487e-08
SmVG_007071:Smp_210100	1.10462	1.66214	-0.995814	0.729309	0.999011	1.17957	1.52752	1.70859	0.355759	2.5497	2.83841	-0.777854	1.36434	2.46843	1.49302	2.46446	2.84547	0.739876	1.4219	0.813779	1.39951	-0.780204	9.44082e-07
SmVG_007071:Smp_210110	1.10462	1.66214	-0.995814	0.729309	0.999011	1.17957	1.52752	1.70859	0.355759	2.5497	2.83841	-0.777854	1.36434	2.46843	1.49302	2.46446	2.84547	0.739876	1.4219	0.813779	1.39951	-0.780204	9.44082e-07
Smp_210730	3.29102	3.95506	-0.475327	1.70392	2.3655	2.13009	2.56029	2.82663	0.873038	6.89154	6.12083	-0.721467	5.99483	7.90744	5.51915	9.07919	8.01702	2.97035	4.40002	2.93674	3.70331	-0.777382	5.25659e-20
Smp_169330	9.91965	10.7617	-0.586342	3.09885	6.17708	3.8806	7.21131	7.512	1.55875	6.66167	4.21995	-0.723822	3.2879	6.29094	2.90378	5.1623	4.53812	1.6177	3.50206	1.54655	2.00307	-0.776913	2.55971e-05
Smp_158630	9.01824	9.93324	-0.827332	3.08554	6.49685	4.38	7.87123	9.01544	1.62031	15.3748	11.433	-0.661501	9.60614	17.1544	11.1668	15.9339	15.9932	4.83775	9.77283	6.0946	6.62973	-0.776368	3.13364e-11
SmVG_025641:Smp_131530	7.6632	8.75392	-0.54922	2.98041	4.46234	3.353	5.78326	5.08635	1.64744	12.9508	10.1144	-0.729642	7.68413	11.5863	6.62304	11.3439	11.2724	3.9532	6.80674	3.844	4.89922	-0.775687	3.82545e-10
SmVG_025641:Smp_131550	7.6632	8.75392	-0.54922	2.98041	4.46234	3.353	5.78326	5.08635	1.64744	12.9508	10.1144	-0.729642	7.68413	11.5863	6.62304	11.3439	11.2724	3.9532	6.80674	3.844	4.89922	-0.775687	3.82545e-10
Smp_210330	16.3656	21.2332	-0.523794	5.55308	8.35058	6.26032	10.7714	11.9373	3.14713	26.3753	15.8373	-0.695687	12.9821	21.3321	11.7694	20.6692	18.5725	7.02698	12.9787	6.87232	7.30904	-0.767197	1.06266e-07
Smp_155180	7.31316	10.2036	-0.9637	4.02042	8.61746	5.8448	15.5823	16.9245	2.86558	13.9758	7.07471	-0.652373	11.1901	21.2784	10.3933	22.0792	23.9611	8.10216	16.3937	7.60269	8.755	-0.76607	7.96219e-05
Smp_061680	7.0761	9.74877	-0.494256	3.16108	4.51289	4.19318	5.78106	5.71982	1.55745	18.0041	16.2452	-0.75415	12.0985	16.6192	9.93746	16.63	15.1814	5.86652	9.14235	5.20132	7.55108	-0.76596	2.51585e-11
Smp_097820	2.27717	3.0968	-0.581236	1.03263	1.39309	1.17203	2.12854	1.72003	0.439262	5.45528	5.1674	-0.682677	3.74634	5.12935	3.31632	4.71199	4.62344	1.71957	2.63415	1.57537	2.23448	-0.763275	3.57789e-11
Smp_172250	6.9793	11.3456	-0.715988	4.69527	3.97002	3.89882	7.41539	7.00711	2.54444	42.9438	29.1897	-0.669286	27.0111	37.4548	18.194	28.8957	34.0903	13.7033	21.6506	10.0474	13.2245	-0.761512	2.26757e-05
Smp_172400	5.43425	5.96897	-1.25863	1.83893	3.54351	3.74252	6.97035	6.75594	0.961119	11.3099	9.7354	-0.696635	7.97131	11.0618	6.32892	11.1838	10.5118	3.98679	6.2888	3.4368	4.92476	-0.761234	5.1072e-12
Smp_197920	36.3233	48.0807	-0.713495	17.2959	27.6174	20.0998	36.902	42.228	9.14345	40.4535	31.5649	-0.67258	29.4581	45.3813	30.5139	44.1079	45.0648	14.9452	25.9767	17.0601	17.7405	-0.758569	5.34523e-13
Smp_131220	3.69114	5.2122	-0.843036	1.59972	2.68724	2.34247	4.27872	4.97356	0.852485	4.14162	3.07429	-0.702094	2.84081	4.42578	2.12226	3.67562	3.80235	1.41694	2.51706	1.1647	1.78802	-0.757201	4.18391e-06
SmVG_015539:Smp_149880	3.55951	4.86373	-1.05283	0.868021	2.09618	3.01332	4.44637	4.68167	0.667793	7.44249	6.86726	-0.8954	4.74636	6.94358	4.81471	9.83326	8.03692	2.85674	4.62476	3.23271	4.18952	-0.756527	2.49957e-18
SmVG_015539:Smp_149890	3.55951	4.86373	-1.05283	0.868021	2.09618	3.01332	4.44637	4.68167	0.667793	7.44249	6.86726	-0.8954	4.74636	6.94358	4.81471	9.83326	8.03692	2.85674	4.62476	3.23271	4.18952	-0.756527	2.49957e-18
Smp_154160	61.9536	71.0717	-0.362407	28.3697	46.5482	36.4331	44.7469	44.0082	14.9492	73.1464	63.6157	-0.798108	56.2797	79.0479	61.22	85.2023	86.2533	28.8888	45.6433	34.4344	36.6182	-0.756223	6.14443e-17
Smp_175590	5.44258	6.69139	-0.865055	3.05492	3.47449	2.03982	5.2723	5.62593	1.48188	6.33785	3.96489	-0.729299	4.49285	6.72078	3.91882	6.3225	5.69813	2.10027	3.70155	2.01031	2.06212	-0.755392	6.18461e-07
Smp_170940	2.53457	2.36727	-0.735551	0.892207	1.75615	1.07805	2.33448	2.33973	0.521636	4.91251	3.41699	-0.743873	2.68013	5.34912	2.47371	4.79274	4.36523	1.40143	3.15915	1.4123	2.01683	-0.754507	1.46195e-06
Smp_138010	1.13166	1.25833	-1.38764	0.294111	0.769169	0.582919	1.40079	1.4996	0.152008	2.83074	1.84175	-0.696523	1.48019	2.7798	1.83382	3.16153	1.88522	0.73352	1.53804	0.974767	0.986082	-0.753761	4.28668e-05
Smp_042440	19.0112	26.2057	-0.582768	13.4355	22.934	16.8622	25.6719	27.1459	7.15858	9.3083	10.4999	-0.853141	9.42794	16.3753	12.9185	21.0018	18.366	4.9483	9.5742	7.10879	10.0715	-0.753642	1.08813e-08
Smp_008620	2.56661	3.26675	-1.1103	1.20922	1.76579	2.14384	3.617	3.39003	0.583208	8.93109	7.73873	-0.671219	5.68001	9.05639	5.6809	9.08915	8.17841	2.67965	4.95113	2.8835	3.76605	-0.753501	7.33446e-15
Smp_072870	11.0622	12.8875	-0.872035	5.08352	8.68221	6.20512	11.8405	12.9942	2.57714	19.8649	13.6158	-0.727408	13.2152	22.1785	9.82867	16.9057	17.8441	6.5785	12.432	5.20208	7.30534	-0.75277	1.10116e-05
Smp_152330	21.419	31.7834	-0.422547	9.7158	12.2733	10.8425	15.5581	15.8073	5.25908	43.5168	39.4578	-0.71189	30.1352	39.716	27.3573	42.7194	41.1047	15.4208	22.9223	15.3461	19.6898	-0.752716	2.91574e-15
Smp_212210	35.8434	46.0481	-0.935205	15.3087	30.2865	23.2412	47.7508	55.4158	8.19908	34.9528	14.6886	-0.79117	18.3915	46.2742	14.2209	24.5167	31.6147	9.42362	26.5063	7.95802	11.3096	-0.752645	0.0105284
Smp_001950	10.5789	16.8669	-0.765863	6.20961	11.0186	6.89876	15.0143	17.0968	3.27345	32.0279	27.1081	-0.926825	34.8865	48.7192	36.0785	54.1312	54.131	17.8971	28.3047	20.1364	24.4643	-0.751248	3.86576e-18
Smp_145840	1.90024	2.40441	-1.09004	0.746824	1.7203	1.5674	2.31011	2.5898	0.348604	3.81728	1.79244	-0.850484	1.83897	4.77004	1.30116	2.62125	3.13535	0.931548	2.69313	0.677484	1.14028	-0.751243	0.010648
Smp_011560	41.526	71.9146	-0.704168	29.234	28.1283	23.3252	58.0433	52.2475	17.1492	252.131	216.57	-0.700653	186.662	260.736	172.973	297.407	306.374	104.998	165.279	108.267	127.553	-0.750094	1.00855e-13
Smp_174490	15.7595	19.8049	-0.934629	5.93972	11.1221	6.85061	15.0041	17.1963	2.94842	25.0114	15.8281	-0.626169	14.7669	26.8845	13.4488	20.3488	21.6811	7.20292	14.9783	7.04979	8.34389	-0.749443	1.08891e-06
Smp_082370	7.48859	7.46447	-0.4423	2.45687	5.46846	4.24665	4.5199	4.45664	1.21227	1.55946	1.58893	-0.681788	0.997691	1.63782	0.914405	1.5629	1.368	0.470108	0.895721	0.467788	0.770217	-0.746788	3.43511e-05
Smp_009070	18.4117	23.8149	-0.434655	10.6982	11.7281	9.63028	14.875	13.7066	5.15686	59.3716	41.6334	-0.714685	31.9425	57.032	34.6212	52.9888	47.8544	14.8222	30.5281	17.3484	19.2217	-0.746249	4.92735e-10
SmVG_012648:Smp_023570	7.1923	9.03036	-1.51772	1.94323	4.40036	2.44929	8.19261	8.68142	1.02465	7.49779	5.25449	-0.667211	4.85327	7.44887	5.02025	6.75544	6.6276	2.38153	4.21124	2.70045	2.5947	-0.743665	1.73805e-07
SmVG_012648:Smp_116630	7.1923	9.03036	-1.51772	1.94323	4.40036	2.44929	8.19261	8.68142	1.02465	7.49779	5.25449	-0.667211	4.85327	7.44887	5.02025	6.75544	6.6276	2.38153	4.21124	2.70045	2.5947	-0.743665	1.73805e-07
SmVG_012648:Smp_134890	7.1923	9.03036	-1.51772	1.94323	4.40036	2.44929	8.19261	8.68142	1.02465	7.49779	5.25449	-0.667211	4.85327	7.44887	5.02025	6.75544	6.6276	2.38153	4.21124	2.70045	2.5947	-0.743665	1.73805e-07
Smp_161120	12.5302	15.4559	-0.54408	4.78831	7.99302	6.55802	10.2803	9.5063	2.41539	27.0734	25.469	-0.693054	18.5326	25.7274	17.8864	26.9352	25.9671	8.969	14.237	9.39579	11.8712	-0.743319	3.11229e-16
Smp_049580	5.821	7.99613	-0.979772	2.23553	3.42739	2.62402	5.9207	5.57251	1.15935	18.3486	14.9567	-0.676901	9.48756	16.4367	10.1863	16.5041	13.3391	4.72432	9.3311	5.4796	6.9906	-0.743184	9.73911e-11
SmVG_011538:Smp_074010.1	15.0665	16.6598	-0.598351	7.58825	12.8345	9.26435	14.9272	14.9033	4.04103	25.599	17.1653	-0.789401	19.9103	31.7236	17.0676	27.7397	27.1405	10.1778	18.267	9.46071	11.3653	-0.742495	9.84714e-08
SmVG_011538:Smp_074010.2	15.0665	16.6598	-0.598351	7.58825	12.8345	9.26435	14.9272	14.9033	4.04103	25.599	17.1653	-0.789401	19.9103	31.7236	17.0676	27.7397	27.1405	10.1778	18.267	9.46071	11.3653	-0.742495	9.84714e-08
SmVG_011538:Smp_074020	15.0665	16.6598	-0.598351	7.58825	12.8345	9.26435	14.9272	14.9033	4.04103	25.599	17.1653	-0.789401	19.9103	31.7236	17.0676	27.7397	27.1405	10.1778	18.267	9.46071	11.3653	-0.742495	9.84714e-08
SmVG_016736:Smp_055640	5.83537	5.79679	-1.054	2.2243	4.21044	3.55232	6.76805	7.77398	1.26325	13.2974	10.6474	-0.659599	9.4609	14.5959	8.98633	15.9557	13.4524	5.04066	8.58246	5.21939	6.4255	-0.740981	1.49217e-13
SmVG_016736:Smp_055650	5.83537	5.79679	-1.054	2.2243	4.21044	3.55232	6.76805	7.77398	1.26325	13.2974	10.6474	-0.659599	9.4609	14.5959	8.98633	15.9557	13.4524	5.04066	8.58246	5.21939	6.4255	-0.740981	1.49217e-13
Smp_000670	26.4075	33.7102	-0.475015	10.6637	18.4026	11.7197	19.4979	20.6006	5.68027	39.1251	22.759	-0.748099	24.3992	40.6126	19.4192	31.4055	32.6726	12.2396	23.0745	10.7819	12.6671	-0.736981	6.27098e-06
Smp_212570	37.0023	43.6272	-0.348362	12.7925	23.8106	17.7116	25.2351	28.7633	6.79908	30.9724	31.1442	-0.649007	20.4143	30.62	21.499	33.6909	30.589	10.1672	17.3308	11.7018	15.5922	-0.734551	2.18347e-17
Smp_143430	7.91915	11.7481	-0.555571	3.68333	4.9404	4.21516	6.50328	7.34366	1.89274	13.4495	10.4533	-0.646192	8.11107	12.6324	7.00167	10.8715	11.2836	4.02873	7.11379	3.75222	4.87787	-0.733853	1.01439e-08
SmVG_024190:Smp_162790	6.0153	8.50246	-0.845477	3.06865	4.86842	4.94322	8.07275	8.02068	1.53011	10.9794	7.44121	-0.668666	8.51941	13.9478	8.10805	11.9307	11.4583	4.11533	7.68524	4.14076	4.94422	-0.733218	2.51186e-08
SmVG_024190:Smp_183250	6.0153	8.50246	-0.845477	3.06865	4.86842	4.94322	8.07275	8.02068	1.53011	10.9794	7.44121	-0.668666	8.51941	13.9478	8.10805	11.9307	11.4583	4.11533	7.68524	4.14076	4.94422	-0.733218	2.51186e-08
SmVG_025039:Smp_061970	3.57975	4.13897	-0.422476	1.85944	2.46013	2.32624	3.15442	3.22641	1.01909	7.23675	6.3939	-0.670986	4.93036	7.6874	5.88664	7.94641	6.98149	2.45749	4.34745	3.21082	3.58611	-0.731417	4.55173e-11
SmVG_025039:Smp_155490	3.57975	4.13897	-0.422476	1.85944	2.46013	2.32624	3.15442	3.22641	1.01909	7.23675	6.3939	-0.670986	4.93036	7.6874	5.88664	7.94641	6.98149	2.45749	4.34745	3.21082	3.58611	-0.731417	4.55173e-11
Smp_127140	8.33274	11.2205	-0.677955	2.91012	5.07133	4.36683	7.45182	7.84298	1.49191	12.3264	10.3091	-0.66338	9.14344	11.3189	7.5531	11.4136	11.0763	4.49922	6.35072	4.02425	4.84152	-0.725473	3.30634e-11
Smp_045200	259.481	403.644	-0.457624	90.9908	147.758	100.083	181.96	195.731	51.5831	1071.71	947.289	-0.674832	657.6	924.654	606.891	972.186	957.555	355.98	556.365	356.668	455.276	-0.725416	3.28239e-13
Smp_129500	5.25622	4.76631	-0.507733	2.76242	4.94172	4.50806	5.39316	5.8612	1.38885	2.41219	2.32568	-0.745107	2.41044	3.43049	1.98019	3.30488	2.84071	1.17558	1.87341	1.04387	1.56436	-0.721427	1.11045e-06
SmVG_001354:Smp_214180	15.7467	26.8922	-0.88762	8.07286	11.5876	7.82494	19.5845	16.4798	4.15713	100.886	61.2149	-0.665408	61.7668	112.512	56.288	87.1016	87.6557	30.751	63.3623	30.1533	35.5944	-0.721193	6.39218e-06
SmVG_001354:Smp_214190	15.7467	26.8922	-0.88762	8.07286	11.5876	7.82494	19.5845	16.4798	4.15713	100.886	61.2149	-0.665408	61.7668	112.512	56.288	87.1016	87.6557	30.751	63.3623	30.1533	35.5944	-0.721193	6.39218e-06
SmVG_029153:Smp_053190	6.52672	7.37629	-0.586524	2.6228	4.4625	3.37023	5.31002	5.92304	1.37781	8.0174	8.12819	-0.6461	6.30099	8.02455	5.44652	8.73072	8.32394	3.1538	4.53546	2.94091	4.1543	-0.720361	3.30275e-14
SmVG_029153:Smp_150660	6.52672	7.37629	-0.586524	2.6228	4.4625	3.37023	5.31002	5.92304	1.37781	8.0174	8.12819	-0.6461	6.30099	8.02455	5.44652	8.73072	8.32394	3.1538	4.53546	2.94091	4.1543	-0.720361	3.30275e-14
SmVG_029153:Smp_150670	6.52672	7.37629	-0.586524	2.6228	4.4625	3.37023	5.31002	5.92304	1.37781	8.0174	8.12819	-0.6461	6.30099	8.02455	5.44652	8.73072	8.32394	3.1538	4.53546	2.94091	4.1543	-0.720361	3.30275e-14
Smp_075420	13.0489	18.2474	-0.800192	5.01969	6.73557	3.32092	10.003	8.45126	2.72897	79.9432	43.8888	-0.689985	33.4234	63.4371	30.7683	48.5688	48.3286	17.3963	36.9744	17.3112	18.8951	-0.71976	1.70833e-05
SmVG_002865:Smp_122050	8.3534	8.76483	-0.69462	2.87922	4.76665	4.35555	5.45093	6.98226	1.49171	7.16677	7.2878	-0.676943	4.45856	6.22895	4.62158	7.04016	6.03567	2.19169	3.5004	2.49271	3.27338	-0.719028	2.08218e-12
SmVG_002865:Smp_187170	8.3534	8.76483	-0.69462	2.87922	4.76665	4.35555	5.45093	6.98226	1.49171	7.16677	7.2878	-0.676943	4.45856	6.22895	4.62158	7.04016	6.03567	2.19169	3.5004	2.49271	3.27338	-0.719028	2.08218e-12
SmVG_002865:Smp_194790	8.3534	8.76483	-0.69462	2.87922	4.76665	4.35555	5.45093	6.98226	1.49171	7.16677	7.2878	-0.676943	4.45856	6.22895	4.62158	7.04016	6.03567	2.19169	3.5004	2.49271	3.27338	-0.719028	2.08218e-12
Smp_176130	7.60809	11.0375	-0.506599	2.91744	5.19318	5.65736	7.28805	7.02774	1.45942	15.8402	21.2437	-0.702797	12.4088	15.7403	15.2308	23.7996	18.6785	6.00003	8.66975	7.81523	10.33	-0.718533	6.49528e-09
Smp_211150	7.72676	9.51789	-0.907443	2.5841	4.57988	3.41686	7.03116	6.81483	1.40118	17.7615	11.6186	-0.682592	8.47745	15.5828	8.16821	12.7829	13.094	4.32177	9.06078	4.47491	5.31869	-0.717757	7.11078e-07
SmVG_000039:Smp_130920	2.29715	2.90671	-0.828337	0.996084	2.14096	2.1634	3.71866	3.08643	0.540409	8.74028	6.55817	-0.718004	9.92764	14.4594	7.55586	13.1507	12.4408	5.09566	8.36621	4.18467	5.82786	-0.717034	5.30976e-07
SmVG_000039:Smp_130930	2.29715	2.90671	-0.828337	0.996084	2.14096	2.1634	3.71866	3.08643	0.540409	8.74028	6.55817	-0.718004	9.92764	14.4594	7.55586	13.1507	12.4408	5.09566	8.36621	4.18467	5.82786	-0.717034	5.30976e-07
Smp_079560	19.3637	21.187	-0.7862	6.51652	14.8233	13.8176	19.7369	21.3392	2.96618	5.76585	3.69319	-0.765678	3.46022	6.25849	3.67476	4.81606	4.90014	1.60317	3.3597	1.81943	1.89354	-0.714704	7.80683e-05
Smp_166930	38.5682	50.7486	-0.459556	22.0337	23.404	19.2811	28.2801	27.877	11.1645	86.3564	61.3706	-0.702294	52.4362	78.0623	46.9961	71.5028	65.8824	25.4451	43.2635	24.7191	28.2774	-0.711898	1.56265e-09
Smp_124390	15.8569	17.0534	-1.22746	9.24897	14.0831	12.4817	23.158	27.1341	4.67579	17.9306	16.4519	-0.703324	16.4524	23.5442	13.3559	19.4157	22.5724	7.99872	13.1728	7.09365	10.579	-0.711715	4.87101e-08
Smp_001390	5.66473	8.07102	-0.921476	2.04626	4.0346	2.74281	5.30041	5.34226	1.02056	10.6224	6.33344	-0.814881	6.19676	10.2349	5.46413	7.81419	8.18189	2.94944	5.72444	2.80236	3.5528	-0.709034	1.32393e-05
Smp_096320	12.8825	15.262	-0.727981	5.11252	7.824	6.07172	11.0279	10.9039	2.72082	19.2169	10.4542	-0.668359	9.50169	17.7817	8.39247	14.3246	12.5827	4.8479	10.1958	4.67184	5.01336	-0.708444	5.51153e-05
SmVG_015550:Smp_149790	7.61609	9.73444	-1.05441	3.41342	5.15004	4.19327	9.41026	9.87412	1.85999	18.1717	12.0665	-0.696916	11.5962	18.5209	8.69599	15.4119	14.1154	5.92675	10.6822	4.79813	6.56673	-0.708435	4.98609e-06
SmVG_015550:Smp_149810.1	7.61609	9.73444	-1.05441	3.41342	5.15004	4.19327	9.41026	9.87412	1.85999	18.1717	12.0665	-0.696916	11.5962	18.5209	8.69599	15.4119	14.1154	5.92675	10.6822	4.79813	6.56673	-0.708435	4.98609e-06
SmVG_015550:Smp_149810.2	7.61609	9.73444	-1.05441	3.41342	5.15004	4.19327	9.41026	9.87412	1.85999	18.1717	12.0665	-0.696916	11.5962	18.5209	8.69599	15.4119	14.1154	5.92675	10.6822	4.79813	6.56673	-0.708435	4.98609e-06
Smp_128230	38.1069	54.7113	-0.325345	20.5993	22.7256	22.4234	26.2783	31.2037	10.6309	50.0893	32.3665	-0.680671	28.1365	44.8889	25.8597	37.0669	40.9733	14.0996	25.512	14.0472	15.1302	-0.708313	9.33904e-08
Smp_139190	4.09631	4.85564	-0.999017	1.32381	2.48363	1.95141	4.21577	4.49657	0.704215	6.11605	5.17426	-0.675187	3.88444	5.44727	3.42502	5.43252	5.44019	1.9637	3.09691	1.86939	2.45247	-0.70809	3.90379e-10
Smp_125300	1.69112	1.97518	-0.550685	0.697775	1.56902	1.56583	1.75268	1.9556	0.370864	4.44377	3.62846	-0.685002	3.8684	5.49191	3.30014	5.8075	4.82851	1.95597	3.04364	1.75164	2.23869	-0.706515	7.35635e-11
Smp_147220	8.50181	10.9326	-0.978947	3.15515	5.38261	3.40841	9.04115	9.80947	1.79098	15.3985	8.90221	-0.618511	7.91268	14.1278	6.27328	11.3143	11.2644	4.22339	8.43769	3.59347	4.54219	-0.706369	3.64124e-05
Smp_159050	6.60701	8.22413	-1.15404	2.14162	3.8824	1.69334	6.23065	6.90663	1.14117	23.5555	13.9131	-0.638139	11.4453	22.4966	10.8859	16.0362	17.4018	5.85854	12.9404	6.05628	7.16879	-0.705721	4.70206e-05
Smp_147060	1.95918	4.27157	-1.00079	1.8581	1.02672	0.882164	2.70663	2.81619	1.04593	6.49104	4.59411	-0.716446	5.04168	4.86771	3.2665	6.14513	3.28671	2.48957	2.85986	1.8241	2.11498	-0.704968	0.0117659
SmVG_025587:Smp_026540	5.00202	6.17517	-0.767253	2.13512	3.87225	3.59783	5.36523	5.59817	1.31945	9.23712	6.05354	-0.849629	6.53202	10.2072	6.07231	10.7983	10.1548	3.78348	6.45765	3.78733	4.61889	-0.700193	1.05566e-11
SmVG_025587:Smp_136500	5.00202	6.17517	-0.767253	2.13512	3.87225	3.59783	5.36523	5.59817	1.31945	9.23712	6.05354	-0.849629	6.53202	10.2072	6.07231	10.7983	10.1548	3.78348	6.45765	3.78733	4.61889	-0.700193	1.05566e-11
SmVG_025587:Smp_187700	5.00202	6.17517	-0.767253	2.13512	3.87225	3.59783	5.36523	5.59817	1.31945	9.23712	6.05354	-0.849629	6.53202	10.2072	6.07231	10.7983	10.1548	3.78348	6.45765	3.78733	4.61889	-0.700193	1.05566e-11
Smp_179560	9.12543	14.3437	-0.805372	3.06404	6.18901	5.50942	9.20448	9.60888	1.56779	14.2012	11.8139	-0.635285	9.9334	15.9298	9.93894	13.8153	14.0611	4.86672	8.92062	5.33675	6.06362	-0.699718	1.52308e-08
Smp_177060	9.68167	13.783	-0.671669	2.83212	5.58797	4.63254	7.40717	8.43367	1.45104	16.5687	13.4856	-0.638312	9.46676	14.5399	8.46227	13.7005	12.146	4.64211	8.18956	4.51016	6.07563	-0.699617	1.49349e-09
Smp_155030	3.12223	3.23447	-0.649301	1.26944	2.14027	1.52614	2.58663	2.54778	0.66307	5.53444	3.36823	-0.71918	3.63707	6.05529	2.45139	4.54538	4.38244	1.82966	3.4449	1.35211	1.89039	-0.698262	0.000261129
Smp_127840	5.70142	5.5858	-0.537015	3.12804	3.80419	3.70944	4.70677	5.18959	1.59205	10.1208	7.22014	-0.650203	5.96974	10.6253	6.28788	9.02866	9.34182	2.91557	5.92512	3.36465	3.92144	-0.697711	5.02515e-07
Smp_034870	47.0231	57.1741	-0.635699	25.1479	34.6251	24.4403	41.1749	39.2719	12.1194	90.8815	51.7256	-0.720407	52.6283	97.5893	51.0383	72.0338	71.2942	24.5731	52.3835	25.8398	27.7704	-0.697597	1.20236e-05
Smp_148410	3.21159	3.54271	-0.699282	0.757255	1.88591	1.16098	2.43418	2.36319	0.464515	6.0382	5.68451	-0.641486	3.8694	5.52899	2.58871	4.96628	4.84896	1.92229	3.27027	1.64229	2.64776	-0.697419	2.63626e-05
Smp_150350	9.39642	11.5008	-0.724253	5.4028	8.34172	7.65915	13.1461	14.9023	2.92456	15.8994	13.1155	-0.607263	12.6387	20.0353	10.956	18.3193	17.5265	6.40713	11.5147	6.11661	8.62106	-0.696454	3.23297e-09
Smp_155920	31.1798	37.1734	-1.04036	11.5853	21.4602	15.2814	35.4014	42.1436	6.09238	47.3608	35.6274	-0.62179	29.8844	49.1785	25.8043	42.682	44.6166	14.8643	27.7766	13.8855	19.0553	-0.694604	4.95177e-08
Smp_135080	40.5003	45.5183	-0.332699	18.1292	28.2082	19.767	30.8564	28.3268	8.92879	56.3287	45.6447	-0.611851	34.5507	59.3559	37.8087	54.32	51.0943	16.8793	33.07	19.5701	22.9096	-0.694346	4.03591e-09
Smp_145110	1.83309	2.13405	-0.951797	0.604673	1.44724	1.3184	2.04767	2.30637	0.313644	1.00029	0.803684	-1.0058	0.827098	1.23927	0.692085	1.24714	1.09437	0.394517	0.692706	0.387796	0.551147	-0.692817	1.81413e-05
Smp_160860	3.18676	1.68089	-0.993849	0.992633	1.48393	1.10342	2.52259	2.83043	0.562274	3.31149	3.20604	-0.808226	2.67505	3.42867	2.19927	3.75155	4.492	1.60405	2.09709	1.4597	1.94067	-0.692401	0.000163439
SmVG_012771:Smp_015070.1	16.509	21.7736	-0.862402	8.51187	16.0529	12.1957	21.657	23.645	4.52762	25.2122	17.1346	-0.780422	21.8528	36.1255	19.8167	29.8166	30.7554	10.8406	20.1178	10.682	13.3085	-0.691971	9.35934e-09
SmVG_012771:Smp_015070.2	16.509	21.7736	-0.862402	8.51187	16.0529	12.1957	21.657	23.645	4.52762	25.2122	17.1346	-0.780422	21.8528	36.1255	19.8167	29.8166	30.7554	10.8406	20.1178	10.682	13.3085	-0.691971	9.35934e-09
SmVG_012771:Smp_117810	16.509	21.7736	-0.862402	8.51187	16.0529	12.1957	21.657	23.645	4.52762	25.2122	17.1346	-0.780422	21.8528	36.1255	19.8167	29.8166	30.7554	10.8406	20.1178	10.682	13.3085	-0.691971	9.35934e-09
SmVG_011669:Smp_129390	2.47528	2.82068	-1.0275	0.617943	1.40743	1.24338	2.28724	2.69596	0.327596	3.61818	3.7192	-0.655147	2.35721	3.12144	2.41361	3.7122	3.39265	1.17448	1.77319	1.30955	1.69488	-0.691423	9.99115e-13
SmVG_011669:Smp_129400	2.47528	2.82068	-1.0275	0.617943	1.40743	1.24338	2.28724	2.69596	0.327596	3.61818	3.7192	-0.655147	2.35721	3.12144	2.41361	3.7122	3.39265	1.17448	1.77319	1.30955	1.69488	-0.691423	9.99115e-13
Smp_158930	8.01217	9.77046	-0.768378	3.8466	6.11357	4.67963	9.28666	10.2504	1.96258	9.3296	5.74971	-0.637434	5.37875	10.3499	5.74852	8.52795	7.89941	2.59141	5.76066	3.06611	3.27258	-0.690478	5.64843e-06
Smp_000260	306.12	495.319	-0.737679	126.303	221.724	199.15	350.7	388.309	63.3069	524.222	381.342	-0.608995	373.7	578.609	352.553	468.949	520.011	181.491	320.606	185.956	205.179	-0.689822	2.80307e-07
Smp_129210	19.0571	22.7985	-1.01257	5.49562	11.9354	8.35284	17.2955	19.2014	2.84518	24.2881	17.8081	-0.656263	13.4244	22.4586	11.8532	18.0576	18.8363	6.66315	12.7162	6.38383	8.92065	-0.688585	7.75337e-07
Smp_198330	4.50267	5.68703	-0.95642	1.69185	3.37665	2.73486	5.18512	5.92412	0.905186	5.4817	5.69797	-0.662915	5.21423	5.93807	3.46704	5.90034	7.03936	2.5879	3.36746	1.88459	3.15402	-0.687963	3.21222e-06
Smp_123710	4.02139	3.4357	-0.426976	1.27996	2.4435	2.42846	2.53367	2.78371	0.687659	7.90219	9.5585	-0.605319	6.14205	7.33438	4.95919	9.0238	7.94582	3.10547	4.18512	2.73015	4.6572	-0.683725	8.71011e-09
SmVG_000370:Smp_133020	5.60145	5.74526	-0.489687	6.23108	8.23309	6.14522	8.55454	8.81998	3.25735	9.95653	8.24361	-0.763503	15.9522	23.0221	12.7585	19.9751	19.7944	7.91847	13.0309	6.92272	9.50898	-0.682401	1.87646e-08
SmVG_000370:Smp_191040	5.60145	5.74526	-0.489687	6.23108	8.23309	6.14522	8.55454	8.81998	3.25735	9.95653	8.24361	-0.763503	15.9522	23.0221	12.7585	19.9751	19.7944	7.91847	13.0309	6.92272	9.50898	-0.682401	1.87646e-08
Smp_155020	7.62295	9.21898	-0.66475	2.90443	7.28985	5.80522	8.31249	9.42917	1.55906	8.95264	7.05648	-0.669745	7.35722	12.7438	7.64435	11.7821	10.7102	3.69504	7.3011	4.17363	5.34848	-0.68075	5.44851e-09
SmVG_029167:Smp_156100	9.90606	12.7885	-0.515216	3.92638	6.92989	5.00846	9.18499	10.3564	2.18141	14.6204	12.6165	-0.576176	10.2434	16.143	9.00638	14.8976	16.2711	5.77749	9.8876	5.41746	7.33828	-0.680429	9.31365e-08
SmVG_029167:Smp_156110	9.90606	12.7885	-0.515216	3.92638	6.92989	5.00846	9.18499	10.3564	2.18141	14.6204	12.6165	-0.576176	10.2434	16.143	9.00638	14.8976	16.2711	5.77749	9.8876	5.41746	7.33828	-0.680429	9.31365e-08
Smp_124020	35.6862	36.5795	-0.32457	10.1752	20.7984	14.4431	15.7132	24.5851	5.23134	13.1265	10.5966	-0.676743	7.23291	10.8703	8.13868	10.3957	10.3741	3.69357	6.24403	4.58573	4.59959	-0.679436	2.74355e-09
Smp_158830	8.684	10.2305	-0.81749	2.95991	6.02315	4.24037	7.99439	9.18039	1.53706	13.0219	9.56078	-0.663738	8.17221	14.3696	8.47538	13.2818	11.8532	4.12821	8.14857	4.56147	5.5558	-0.677948	8.724e-08
Smp_164450	19.4004	23.7073	-0.916791	9.97721	16.997	14.722	25.6552	29.1342	5.02909	19.4041	18.4147	-0.486628	18.0066	26.1495	17.6151	24.629	25.1266	8.72919	14.5417	9.23254	11.0137	-0.671246	7.07105e-12
Smp_006290	2.42061	2.48067	-0.609449	1.76358	2.22556	2.82712	3.62122	3.40784	1.01172	9.26283	7.49348	-0.676659	7.72442	12.5671	8.06525	12.6479	11.7508	3.94912	7.36253	4.35253	5.61597	-0.666897	3.99989e-10
Smp_029390	111.844	147.399	-0.672779	59.2875	84.7275	68.2393	106.123	107.438	28.5159	131.639	90.0936	-0.692068	86.9851	146.145	97.762	127.32	114.089	40.7127	78.9021	49.4837	49.5269	-0.666233	1.38214e-08
Smp_175640	12.0871	15.7572	-0.916725	3.29349	7.8951	6.24506	11.5262	12.6118	1.55528	14.5132	14.3259	-0.611416	10.7571	13.8936	8.97822	14.8291	13.1684	5.05734	7.45785	5.0987	6.80662	-0.663893	1.8069e-14
Smp_155750	3.17814	3.43108	-0.358405	2.3586	3.6052	3.08369	3.22624	3.36231	1.11419	5.96428	4.94876	-0.738108	6.46039	9.24547	5.92182	8.91071	8.11961	3.02083	4.98444	3.03845	4.08262	-0.662833	1.00015e-12
Smp_103670	1.82772	2.59988	-1.89142	1.299	2.43602	2.54123	7.04635	5.85851	0.726165	8.43509	8.08954	-0.735059	5.40024	9.82426	5.0129	11.7076	9.8523	2.68127	6.30271	2.91615	5.87898	-0.66277	0.00167247
Smp_161480	23.2046	24.0084	-0.989163	8.68081	17.3107	12.6312	26.7475	28.2544	4.40669	19.8315	13.0349	-0.690638	13.659	22.5474	12.1899	18.7468	17.3409	6.51844	12.4922	6.51097	7.56997	-0.662504	7.40649e-07
Smp_205270	2.37656	2.50223	-1.60275	3.90783	5.33954	5.08431	9.55823	10.0391	2.05132	11.0886	11.3311	-1.03313	32.4817	38.038	31.8177	41.2995	44.7604	16.5561	21.6453	17.5523	19.6059	-0.662404	5.27804e-07
Smp_160500	2.39103	2.60792	-0.782175	0.512335	1.58968	1.52717	2.10795	2.21647	0.256919	1.37175	1.40245	-0.659511	1.26467	1.46177	1.02933	1.50481	1.46788	0.622418	0.821663	0.538744	0.760859	-0.661502	5.1337e-06
Smp_208060	18.6613	21.1656	-0.564439	16.0029	27.0756	23.5491	26.4176	26.3924	8.09328	28.5126	23.3787	-1.04591	42.4653	59.7439	41.9834	57.5007	61.3463	21.1273	33.5699	22.1932	27.7442	-0.661133	1.30287e-11
SmVG_022976:Smp_041520	4.79697	4.27657	-0.58412	1.35504	3.15237	2.65762	3.85011	4.09025	0.710855	5.00241	5.45779	-0.555253	4.17849	5.37024	3.85986	6.15796	5.45659	2.09389	3.09724	2.11761	2.99593	-0.660044	7.52561e-13
SmVG_022976:Smp_144780	4.79697	4.27657	-0.58412	1.35504	3.15237	2.65762	3.85011	4.09025	0.710855	5.00241	5.45779	-0.555253	4.17849	5.37024	3.85986	6.15796	5.45659	2.09389	3.09724	2.11761	2.99593	-0.660044	7.52561e-13
Smp_140890	30.3271	36.5071	-0.851115	13.0292	21.5441	19.0079	33.0018	34.0782	6.43713	50.5608	36.8757	-0.650179	28.39	51.5794	27.5989	42.2035	40.4622	13.7703	28.5869	14.4219	19.1573	-0.659415	4.0778e-06
SmVG_024396:Smp_163680	2.83818	2.4371	-0.464805	0.748757	1.71273	1.77988	1.92024	1.92229	0.381029	6.91403	7.45828	-0.575229	4.56476	6.12054	4.17543	7.85537	5.6547	2.18797	3.38631	2.28234	3.42215	-0.657778	1.29144e-08
SmVG_024396:Smp_163690	2.83818	2.4371	-0.464805	0.748757	1.71273	1.77988	1.92024	1.92229	0.381029	6.91403	7.45828	-0.575229	4.56476	6.12054	4.17543	7.85537	5.6547	2.18797	3.38631	2.28234	3.42215	-0.657778	1.29144e-08
Smp_037780	23.772	29.1575	-0.491979	11.9973	14.4431	13.3387	17.0773	16.7283	6.17326	88.2141	69.0306	-0.637097	52.4938	79.6207	56.6281	73.9894	72.6796	25.9125	44.468	30.2112	32.1877	-0.657514	2.01412e-11
SmVG_035170	2.95044	3.96186	-0.671485	0.386808	1.00434	0.732112	2.19547	2.39158	0.514027	5.59643	4.25073	-0.724569	1.0505	1.99629	1.60118	4.47928	3.87154	1.59611	2.65135	1.79096	2.01354	-0.657462	2.41473e-08
SmVG_012328:Smp_013310	2.99389	4.83486	-0.973512	2.52445	3.76968	2.68929	5.93295	5.92007	1.4219	19.2013	13.0156	-0.743038	18.6682	29.589	14.8588	25.1953	24.7425	9.69842	17.2847	8.38735	10.7821	-0.656835	2.21868e-06
SmVG_012328:Smp_129350	2.99389	4.83486	-0.973512	2.52445	3.76968	2.68929	5.93295	5.92007	1.4219	19.2013	13.0156	-0.743038	18.6682	29.589	14.8588	25.1953	24.7425	9.69842	17.2847	8.38735	10.7821	-0.656835	2.21868e-06
Smp_136470	1.43961	1.99841	-0.705071	0.757706	1.07878	0.863598	1.81121	1.22407	0.37875	11.0712	6.6904	-0.626272	6.73174	11.54	5.57186	8.49327	9.04631	3.30946	6.50585	2.94965	3.67436	-0.656786	5.2414e-05
SmVG_008822:Smp_128730	27.8879	35.7078	-0.779703	12.3248	19.7151	16.1192	30.1327	27.5992	6.23715	53.8649	33.2011	-0.558788	33.979	56.7689	27.6707	41.9208	42.4615	16.7083	31.4286	14.6501	17.4607	-0.656123	5.42706e-05
SmVG_008822:Smp_128740	27.8879	35.7078	-0.779703	12.3248	19.7151	16.1192	30.1327	27.5992	6.23715	53.8649	33.2011	-0.558788	33.979	56.7689	27.6707	41.9208	42.4615	16.7083	31.4286	14.6501	17.4607	-0.656123	5.42706e-05
Smp_175120	24.8837	29.375	-0.838728	15.758	25.4446	13.7616	28.8383	31.453	7.7742	51.1018	34.7071	-0.510258	48.9124	76.5732	40.4415	55.627	60.88	23.4678	42.0909	20.8884	23.8362	-0.654442	1.99643e-05
Smp_197710	4.09887	7.03027	-0.586568	3.21791	5.01842	6.49943	6.80231	6.16959	1.57304	5.18458	4.87659	-0.838771	8.95632	9.82802	4.91384	8.76374	9.48296	4.44317	5.54377	2.65245	5.70887	-0.652428	0.00125182
Smp_058360	12.0971	18.7724	-0.774926	7.77122	12.7122	14.9939	20.4884	17.6432	3.97341	16.023	13.3662	-0.681333	18.0713	24.049	17.8546	23.3317	24.1061	8.96519	13.4223	9.41801	10.9159	-0.651298	4.28756e-13
Smp_170350	26.2107	37.9583	-0.509919	12.389	22.3618	17.5181	25.442	26.5427	6.08931	39.4255	36.827	-0.604813	33.8948	50.6109	33.8499	44.8547	46.9386	15.9033	27.4593	17.1225	21.9128	-0.649443	5.80368e-12
Smp_125820	14.5467	15.8738	-0.903871	4.28112	8.60803	6.17225	11.6703	14.4785	2.26119	19.4397	15.6026	-0.644741	14.4975	17.6887	9.48754	16.2673	16.5907	7.29981	10.1184	5.18347	8.06379	-0.648395	3.79663e-06
Smp_022130	12.0288	12.6227	-0.59098	6.83537	9.78157	8.97782	12.8164	13.0663	3.62624	22.6811	18.3645	-0.553649	16.7946	27.3898	15.4432	22.8968	22.2306	8.39268	15.5979	8.37704	10.9032	-0.647313	6.76837e-08
Smp_005500	22.6848	27.5209	-0.313156	10.8697	20.713	16.5083	18.6319	27.9714	5.57321	5.15779	4.16782	-0.588354	5.14375	7.53716	5.44996	6.15361	7.35184	2.52136	4.20987	2.93235	3.06982	-0.646537	4.84867e-07
Smp_198930	3.05302	5.68532	-0.599913	1.38026	1.94467	1.33831	3.25802	2.63934	0.75489	32.8446	23.2027	-0.574572	17.5308	31.4859	16.9951	24.9047	26.2914	8.82257	17.8852	9.30898	11.5869	-0.644896	2.18277e-06
SmVG_019003:Smp_173220	9.46299	12.8582	-0.765522	3.89369	5.4021	4.18875	8.67824	9.64716	2.1243	17.0402	13.7183	-0.557421	9.93577	14.9476	7.69399	13.728	14.0894	5.55645	9.36204	5.09112	6.67129	-0.644012	1.49988e-07
SmVG_019003:Smp_173230	9.46299	12.8582	-0.765522	3.89369	5.4021	4.18875	8.67824	9.64716	2.1243	17.0402	13.7183	-0.557421	9.93577	14.9476	7.69399	13.728	14.0894	5.55645	9.36204	5.09112	6.67129	-0.644012	1.49988e-07
Smp_141010	22.6944	25.08	-0.383222	11.1208	17.0369	16.5562	19.6521	19.2792	5.78364	37.5968	30.6306	-0.569232	25.3246	40.682	25.9443	35.1333	33.8405	12.5529	22.7732	13.9925	17.1141	-0.642208	7.84327e-07
SmVG_024392:Smp_163730	1.26002	1.88942	-1.02663	0.453127	0.899057	0.893712	1.63618	1.95504	0.270684	1.86654	1.71929	-0.717315	1.31466	2.04627	1.31212	2.17587	1.9057	0.725813	1.26475	0.748223	1.01086	-0.641544	4.50678e-09
SmVG_024392:Smp_163740	1.26002	1.88942	-1.02663	0.453127	0.899057	0.893712	1.63618	1.95504	0.270684	1.86654	1.71929	-0.717315	1.31466	2.04627	1.31212	2.17587	1.9057	0.725813	1.26475	0.748223	1.01086	-0.641544	4.50678e-09
Smp_075370	20.6414	49.9361	-1.16336	11.2432	11.5627	7.09931	29.6582	28.9923	6.06434	235.671	125.429	-0.601618	104.342	197.923	78.5698	138.625	141.659	53.0658	113.846	43.267	56.3799	-0.63948	0.000772685
Smp_124520	10.3105	21.5081	-1.26835	4.72466	7.1577	5.01022	15.1647	14.2899	2.44196	62.7807	33.5611	-0.729297	37.6865	62.837	33.7139	47.6501	47.021	18.6867	35.1874	18.7723	19.0066	-0.639242	1.91469e-05
SmVG_014995:Smp_163040	2.76092	3.70912	-1.19563	0.845214	1.87896	1.47419	3.35139	3.5629	0.431559	3.42705	2.64725	-0.667474	2.38056	3.31696	1.85845	2.91876	2.89948	1.21205	1.90341	1.0907	1.47373	-0.639153	6.45096e-06
SmVG_014995:Smp_185620	2.76092	3.70912	-1.19563	0.845214	1.87896	1.47419	3.35139	3.5629	0.431559	3.42705	2.64725	-0.667474	2.38056	3.31696	1.85845	2.91876	2.89948	1.21205	1.90341	1.0907	1.47373	-0.639153	6.45096e-06
SmVG_033367:Smp_103360	10.5421	13.5679	-0.519908	4.38372	7.53386	5.43022	9.80402	9.1872	2.23027	25.6103	22.0907	-0.554955	17.9449	28.1936	17.7823	25.4026	24.6173	8.8316	15.8342	9.33501	11.6108	-0.638718	1.10617e-10
SmVG_033367:Smp_174480	10.5421	13.5679	-0.519908	4.38372	7.53386	5.43022	9.80402	9.1872	2.23027	25.6103	22.0907	-0.554955	17.9449	28.1936	17.7823	25.4026	24.6173	8.8316	15.8342	9.33501	11.6108	-0.638718	1.10617e-10
SmVG_033367:Smp_179790	10.5421	13.5679	-0.519908	4.38372	7.53386	5.43022	9.80402	9.1872	2.23027	25.6103	22.0907	-0.554955	17.9449	28.1936	17.7823	25.4026	24.6173	8.8316	15.8342	9.33501	11.6108	-0.638718	1.10617e-10
SmVG_033367:Smp_179800	10.5421	13.5679	-0.519908	4.38372	7.53386	5.43022	9.80402	9.1872	2.23027	25.6103	22.0907	-0.554955	17.9449	28.1936	17.7823	25.4026	24.6173	8.8316	15.8342	9.33501	11.6108	-0.638718	1.10617e-10
Smp_152130	7.10828	10.6112	-0.698846	3.46289	4.7557	4.13636	7.63958	7.05482	1.78189	21.3676	16.0732	-0.609733	15.9018	22.0329	11.487	18.4004	18.5958	7.86001	12.3407	6.1527	8.41975	-0.638528	8.69989e-06
SmVG_019971:Smp_080700.3	11.5764	16.1305	-0.972308	4.61687	7.33183	5.77502	12.8874	13.2767	2.46285	22.3728	16.9839	-0.525365	15.7905	21.921	12.7062	18.1931	19.543	8.03114	12.5528	7.00902	8.81723	-0.63508	3.91622e-07
SmVG_019971:Smp_080700.4	11.5764	16.1305	-0.972308	4.61687	7.33183	5.77502	12.8874	13.2767	2.46285	22.3728	16.9839	-0.525365	15.7905	21.921	12.7062	18.1931	19.543	8.03114	12.5528	7.00902	8.81723	-0.63508	3.91622e-07
SmVG_019971:Smp_165660	11.5764	16.1305	-0.972308	4.61687	7.33183	5.77502	12.8874	13.2767	2.46285	22.3728	16.9839	-0.525365	15.7905	21.921	12.7062	18.1931	19.543	8.03114	12.5528	7.00902	8.81723	-0.63508	3.91622e-07
Smp_170530	11.3719	20.3544	-0.592015	5.13119	8.3423	7.01924	11.8839	13.656	2.57476	22.3307	19.6029	-0.585144	16.5505	24.1563	15.5759	23.0969	20.7809	7.95294	13.1426	8.03212	10.4595	-0.632538	5.58463e-11
SmVG_007218:Smp_118010	4.28159	5.53262	-0.702492	1.93613	3.03076	2.84453	4.13549	3.92269	0.994905	14.3888	11.2971	-0.582871	9.61833	14.8922	9.37904	14.4027	12.9475	4.78664	8.46467	5.07906	6.05203	-0.631309	8.15472e-10
SmVG_007218:Smp_158100.1	4.28159	5.53262	-0.702492	1.93613	3.03076	2.84453	4.13549	3.92269	0.994905	14.3888	11.2971	-0.582871	9.61833	14.8922	9.37904	14.4027	12.9475	4.78664	8.46467	5.07906	6.05203	-0.631309	8.15472e-10
SmVG_007218:Smp_158100.2	4.28159	5.53262	-0.702492	1.93613	3.03076	2.84453	4.13549	3.92269	0.994905	14.3888	11.2971	-0.582871	9.61833	14.8922	9.37904	14.4027	12.9475	4.78664	8.46467	5.07906	6.05203	-0.631309	8.15472e-10
Smp_165000	9.2308	9.19453	-0.491121	2.81196	6.13088	5.5482	7.01036	7.38816	1.46317	10.6203	12.6494	-0.551547	7.93585	10.3585	8.07858	12.313	10.7525	3.96833	5.87129	4.39599	6.39341	-0.630733	8.84888e-11
Smp_194980	41.0147	78.7417	-0.715777	15.9951	16.2919	14.4938	36.0922	32.532	8.31309	432.189	254.653	-0.487947	168.887	300.378	123.462	230.338	206.117	86.5223	172.381	67.0684	88.0638	-0.627369	0.000741676
Smp_180790	5.0102	5.96268	-0.910792	1.96466	3.08793	2.34866	4.37403	5.48586	1.02706	6.40288	4.30546	-0.593399	3.82992	6.17093	4.42738	5.35687	5.56188	1.91556	3.51109	2.41349	2.2304	-0.626941	2.38956e-05
Smp_097500	2.79208	3.76791	-0.887994	1.12485	1.83347	1.63274	2.25096	2.54536	0.554196	4.18864	2.54116	-0.666432	2.1047	3.89103	1.68039	2.73621	2.54004	1.05062	2.14721	0.812879	1.25345	-0.626288	0.00120177
Smp_157240	3.22385	2.83339	-0.599295	1.45027	2.29339	1.01496	1.90542	2.43215	0.734959	9.24972	7.43226	-0.605289	6.8247	11.2924	6.44018	10.1592	8.3833	3.37292	6.40633	3.44717	4.28117	-0.626135	3.4309e-06
SmVG_024753:Smp_150770	2.17261	2.83948	-0.826331	0.857192	1.42589	1.29041	2.2653	2.25003	0.431505	8.44018	8.21943	-0.601275	6.11852	8.37683	5.46833	8.63921	7.63376	2.96247	4.61773	2.8743	4.0798	-0.623512	7.34341e-11
SmVG_024753:Smp_172870	2.17261	2.83948	-0.826331	0.857192	1.42589	1.29041	2.2653	2.25003	0.431505	8.44018	8.21943	-0.601275	6.11852	8.37683	5.46833	8.63921	7.63376	2.96247	4.61773	2.8743	4.0798	-0.623512	7.34341e-11
Smp_003140	43.1505	48.6762	-0.495939	15.6697	30.2351	23.1627	32.8621	39.3066	8.30173	27.8507	21.6288	-0.50898	17.2755	28.4162	18.6498	26.424	25.5309	9.28017	17.28	11.4252	11.4417	-0.623446	1.64342e-08
Smp_164040	12.5225	8.09662	-1.0878	4.41717	8.15127	7.46722	12.4479	15.1475	2.4859	4.48325	3.39822	-0.647304	3.1874	4.82919	3.30924	4.72943	4.40957	1.68557	2.88073	1.91445	2.18972	-0.622509	8.80524e-05
SmVG_009094:Smp_039340	10.058	10.3619	-0.52586	4.08729	7.26735	7.57643	9.01304	8.79537	2.18403	14.0499	12.8538	-0.557068	12.0895	15.7001	10.1618	13.9665	14.3079	6.09615	8.98714	5.59736	7.34696	-0.622039	2.06074e-08
SmVG_009094:Smp_143520	10.058	10.3619	-0.52586	4.08729	7.26735	7.57643	9.01304	8.79537	2.18403	14.0499	12.8538	-0.557068	12.0895	15.7001	10.1618	13.9665	14.3079	6.09615	8.98714	5.59736	7.34696	-0.622039	2.06074e-08
SmVG_009094:Smp_143530	10.058	10.3619	-0.52586	4.08729	7.26735	7.57643	9.01304	8.79537	2.18403	14.0499	12.8538	-0.557068	12.0895	15.7001	10.1618	13.9665	14.3079	6.09615	8.98714	5.59736	7.34696	-0.622039	2.06074e-08
Smp_176780	6.44421	5.09127	-0.606332	1.92997	4.46981	3.19443	4.25124	5.58513	0.975947	2.21622	2.44772	-0.617254	1.47302	2.24714	1.41773	2.01274	2.02566	0.733391	1.32175	0.869846	1.19382	-0.621351	0.000276102
Smp_164340	2.28974	3.65541	-0.390849	0.687148	1.19135	0.825515	1.86289	1.79167	0.457499	3.44106	2.78772	-0.527247	2.18824	3.10073	1.59488	2.95778	2.7705	1.15468	1.82687	1.02636	1.37013	-0.619645	2.76642e-06
SmVG_012256:Smp_169230	5.90913	7.74384	-0.45862	2.90427	4.08996	3.66116	4.80587	4.83898	1.41294	10.5104	7.71418	-0.522696	7.93585	10.0886	5.40089	9.14029	8.99989	3.95854	5.85637	3.24401	3.99147	-0.618961	2.6353e-06
SmVG_012256:Smp_169240	5.90913	7.74384	-0.45862	2.90427	4.08996	3.66116	4.80587	4.83898	1.41294	10.5104	7.71418	-0.522696	7.93585	10.0886	5.40089	9.14029	8.99989	3.95854	5.85637	3.24401	3.99147	-0.618961	2.6353e-06
SmVG_012256:Smp_186990	5.90913	7.74384	-0.45862	2.90427	4.08996	3.66116	4.80587	4.83898	1.41294	10.5104	7.71418	-0.522696	7.93585	10.0886	5.40089	9.14029	8.99989	3.95854	5.85637	3.24401	3.99147	-0.618961	2.6353e-06
Smp_048240	21.7442	23.818	-0.70718	9.52197	15.0366	13.9881	22.1776	23.6711	5.08932	32.2583	27.7211	-0.465945	23.6253	36.597	24.8313	31.7755	32.3985	11.9921	20.8917	13.8113	15.6147	-0.618889	5.63588e-10
Smp_165700	6.91027	7.89495	-0.737682	2.51448	4.52183	3.13752	6.14237	5.93999	1.34576	13.2139	7.92448	-0.558339	8.18739	12.9425	6.20297	9.80841	9.52175	4.24941	7.53719	3.46909	4.53311	-0.618839	0.000199142
SmVG_018953:Smp_061510	12.3044	12.464	-0.660955	3.12832	7.93018	6.68373	10.2056	12.1554	1.77276	12.8288	9.89726	-0.567304	7.4829	12.8557	6.02358	11.8462	10.8791	4.08673	7.85243	4.09767	5.46738	-0.61742	4.96301e-06
SmVG_018953:Smp_155220	12.3044	12.464	-0.660955	3.12832	7.93018	6.68373	10.2056	12.1554	1.77276	12.8288	9.89726	-0.567304	7.4829	12.8557	6.02358	11.8462	10.8791	4.08673	7.85243	4.09767	5.46738	-0.61742	4.96301e-06
Smp_028930	6.99003	7.37074	-0.542029	3.00519	4.69652	3.28644	4.44481	5.9159	1.53512	6.7914	5.80834	-0.466189	4.65209	7.0943	4.36408	6.16615	5.48756	2.27284	3.9563	2.30331	2.99571	-0.616855	8.44586e-07
Smp_131800	14.4218	17.0598	-0.366638	5.08875	8.07499	5.86635	10.3996	10.3051	3.11037	21.8048	17.813	-0.547385	12.1687	19.3794	10.8631	18.1747	17.4203	6.55955	11.5264	6.853	8.65589	-0.616578	1.49784e-09
Smp_144760	8.1418	10.848	-0.334061	3.58285	5.37006	4.42611	5.8187	5.55282	1.85011	15.3203	12.5866	-0.588143	9.81001	14.8964	9.75072	13.7485	12.9831	4.80772	8.30766	5.1674	6.2426	-0.616305	1.84776e-09
Smp_032280	5.18855	6.21111	-1.05451	1.46334	2.20203	1.65785	5.30779	5.58967	0.890387	7.66378	7.55132	-0.598023	3.93369	4.42902	2.5088	6.03045	6.17145	2.58425	3.57126	2.30373	3.21832	-0.612339	9.78069e-08
Smp_021590	9.92258	8.70001	-0.86251	3.55317	8.09747	5.90565	9.95508	13.1291	1.79537	3.03185	2.61248	-0.539476	2.96785	3.71756	2.38889	3.54602	3.29735	1.46582	2.06864	1.25358	1.44461	-0.61222	9.08229e-05
SmVG_015669:Smp_118560	9.21586	13.0128	-0.615475	4.48399	6.42437	4.93419	11.5982	9.56092	2.39794	54.4692	37.1007	-0.474517	40.8663	65.2475	30.0183	47.8651	52.6967	20.465	36.9966	16.3641	21.5127	-0.612194	0.000186081
SmVG_015669:Smp_156630	9.21586	13.0128	-0.615475	4.48399	6.42437	4.93419	11.5982	9.56092	2.39794	54.4692	37.1007	-0.474517	40.8663	65.2475	30.0183	47.8651	52.6967	20.465	36.9966	16.3641	21.5127	-0.612194	0.000186081
SmVG_015669:Smp_187900	9.21586	13.0128	-0.615475	4.48399	6.42437	4.93419	11.5982	9.56092	2.39794	54.4692	37.1007	-0.474517	40.8663	65.2475	30.0183	47.8651	52.6967	20.465	36.9966	16.3641	21.5127	-0.612194	0.000186081
SmVG_029164:Smp_169420	8.31173	12.0827	-0.710428	1.92164	4.88042	5.38614	8.92157	11.2618	1.13259	8.9778	7.52672	-0.49949	5.49627	7.20638	4.11694	8.07201	7.9789	3.15699	4.66551	2.80682	3.6569	-0.61081	6.98187e-08
SmVG_029164:Smp_169430	8.31173	12.0827	-0.710428	1.92164	4.88042	5.38614	8.92157	11.2618	1.13259	8.9778	7.52672	-0.49949	5.49627	7.20638	4.11694	8.07201	7.9789	3.15699	4.66551	2.80682	3.6569	-0.61081	6.98187e-08
Smp_137680	3.46339	5.1275	-0.708773	1.44293	2.40199	1.73748	3.58955	3.10885	0.773916	10.2349	7.64909	-0.590443	7.29909	10.2224	5.32161	8.35322	8.85338	3.68053	5.84256	2.89381	4.07853	-0.607997	2.13259e-05
SmVG_002760:Smp_172990	6.4574	9.27345	-0.812829	3.28561	4.1952	3.4681	6.43302	6.18279	1.7808	23.579	14.8255	-0.582914	13.0418	22.2538	10.2326	16.6977	17.1192	6.733	12.976	5.70192	7.80752	-0.606358	0.000166446
SmVG_002760:Smp_173000	6.4574	9.27345	-0.812829	3.28561	4.1952	3.4681	6.43302	6.18279	1.7808	23.579	14.8255	-0.582914	13.0418	22.2538	10.2326	16.6977	17.1192	6.733	12.976	5.70192	7.80752	-0.606358	0.000166446
SmVG_001738:Smp_003110.1	16.2999	29.8789	-0.497227	14.0794	11.7177	10.7474	17.5753	16.2847	6.9952	103.515	88.0458	-0.576057	76.5073	105.539	62.0612	96.2558	103.894	36.7767	58.0349	32.2748	44.5968	-0.605803	3.26157e-06
SmVG_001738:Smp_003110.2	16.2999	29.8789	-0.497227	14.0794	11.7177	10.7474	17.5753	16.2847	6.9952	103.515	88.0458	-0.576057	76.5073	105.539	62.0612	96.2558	103.894	36.7767	58.0349	32.2748	44.5968	-0.605803	3.26157e-06
SmVG_001738:Smp_197080	16.2999	29.8789	-0.497227	14.0794	11.7177	10.7474	17.5753	16.2847	6.9952	103.515	88.0458	-0.576057	76.5073	105.539	62.0612	96.2558	103.894	36.7767	58.0349	32.2748	44.5968	-0.605803	3.26157e-06
SmVG_035057:Smp_130400	6.71107	8.27618	-0.824892	3.83656	5.39225	4.41496	9.5339	9.68523	2.16722	12.6772	8.90177	-0.602033	9.27349	15.3143	8.55606	12.6794	12.6488	4.93905	9.16097	4.84674	6.05619	-0.605598	8.59678e-06
SmVG_035057:Smp_139110	6.71107	8.27618	-0.824892	3.83656	5.39225	4.41496	9.5339	9.68523	2.16722	12.6772	8.90177	-0.602033	9.27349	15.3143	8.55606	12.6794	12.6488	4.93905	9.16097	4.84674	6.05619	-0.605598	8.59678e-06
SmVG_035057:Smp_139120	6.71107	8.27618	-0.824892	3.83656	5.39225	4.41496	9.5339	9.68523	2.16722	12.6772	8.90177	-0.602033	9.27349	15.3143	8.55606	12.6794	12.6488	4.93905	9.16097	4.84674	6.05619	-0.605598	8.59678e-06
Smp_134570	3.35674	5.17	-0.588296	2.22757	2.209	2.2781	2.97993	3.82079	1.23149	13.7194	15.7603	-0.530676	11.0183	14.4826	8.35499	13.3597	15.353	5.81913	8.45908	4.70859	8.98058	-0.605432	1.18515e-05
Smp_156160	5.12387	6.64152	-0.405044	1.51287	2.50537	1.9617	3.76917	3.63214	0.8849	7.4139	6.77601	-0.495157	3.78582	5.63586	3.23111	5.81954	5.90537	2.30424	3.83735	2.33108	3.25442	-0.605004	1.68691e-07
SmVG_029037:Smp_014440	5.59927	5.40437	-0.782725	1.70298	3.5743	1.62585	4.16762	4.83987	0.828182	6.83308	4.90674	-0.529708	3.41567	6.40445	3.82607	4.82711	4.87291	1.60399	3.54916	2.01698	2.28435	-0.603148	1.4259e-05
SmVG_029037:Smp_129990	5.59927	5.40437	-0.782725	1.70298	3.5743	1.62585	4.16762	4.83987	0.828182	6.83308	4.90674	-0.529708	3.41567	6.40445	3.82607	4.82711	4.87291	1.60399	3.54916	2.01698	2.28435	-0.603148	1.4259e-05
SmVG_020674:Smp_077560	17.7411	24.4582	-0.647407	6.99334	11.2728	7.56343	14.7827	14.7774	3.76493	27.8288	17.9447	-0.50126	17.3911	26.6904	15.9259	22.047	21.0533	8.85263	15.259	8.88193	9.32798	-0.597322	2.93054e-06
SmVG_020674:Smp_198280	17.7411	24.4582	-0.647407	6.99334	11.2728	7.56343	14.7827	14.7774	3.76493	27.8288	17.9447	-0.50126	17.3911	26.6904	15.9259	22.047	21.0533	8.85263	15.259	8.88193	9.32798	-0.597322	2.93054e-06
Smp_105090	6.2121	8.20943	-0.46118	2.23521	3.42754	3.04869	5.10318	5.34825	1.31884	12.5899	10.3477	-0.534399	6.96093	11.1139	5.71213	10.819	10.9	4.18536	7.03869	3.99315	5.348	-0.597314	7.40972e-08
Smp_155000	16.59	21.6129	-0.725594	5.80942	9.95612	8.03371	13.5767	15.0317	2.90864	25.88	24.1326	-0.569122	16.9608	23.3685	16.0797	23.0339	20.7383	8.11859	12.7515	8.35831	10.9755	-0.597165	1.73387e-11
Smp_099310	36.4004	42.8634	-0.678433	14.7032	24.7108	18.3222	27.7946	32.2058	7.39962	46.7015	29.7887	-0.631824	25.8413	47.4663	27.4215	37.2116	34.9983	12.5176	26.0452	14.3774	15.6031	-0.595713	4.07895e-06
SmVG_018971:Smp_026040	5.55087	5.50113	-0.718566	1.82309	4.00256	2.72218	4.85593	5.51897	0.974918	6.24682	5.514	-0.468454	4.26096	6.60223	4.27541	5.91188	5.3283	2.12552	3.77363	2.31419	3.00164	-0.594106	2.65724e-07
SmVG_018971:Smp_136250.1	5.55087	5.50113	-0.718566	1.82309	4.00256	2.72218	4.85593	5.51897	0.974918	6.24682	5.514	-0.468454	4.26096	6.60223	4.27541	5.91188	5.3283	2.12552	3.77363	2.31419	3.00164	-0.594106	2.65724e-07
SmVG_018971:Smp_136250.2	5.55087	5.50113	-0.718566	1.82309	4.00256	2.72218	4.85593	5.51897	0.974918	6.24682	5.514	-0.468454	4.26096	6.60223	4.27541	5.91188	5.3283	2.12552	3.77363	2.31419	3.00164	-0.594106	2.65724e-07
SmVG_018971:Smp_136250.3	5.55087	5.50113	-0.718566	1.82309	4.00256	2.72218	4.85593	5.51897	0.974918	6.24682	5.514	-0.468454	4.26096	6.60223	4.27541	5.91188	5.3283	2.12552	3.77363	2.31419	3.00164	-0.594106	2.65724e-07
Smp_097590	8.02281	9.15401	-0.76105	3.5509	6.11184	5.23347	8.68007	8.76785	1.76777	14.6635	8.73756	-0.634629	10.0012	16.8159	6.58754	11.0318	11.1767	4.87925	9.33629	3.44395	5.2049	-0.593857	0.00285116
Smp_032510	35.6698	44.1774	-0.593483	21.1924	30.5999	29.3553	38.6052	43.4071	10.6991	30.7632	19.9025	-0.618157	22.1866	38.7576	22.7526	27.2655	28.45	10.705	21.2536	11.8448	12.5167	-0.592203	5.3123e-05
Smp_140360	9.77344	12.7815	-0.524292	3.0972	6.31	4.6402	8.01625	7.84925	1.62614	16.5309	12.9316	-0.508393	9.84754	16.026	10.4468	15.3249	13.5019	4.97077	9.1204	5.68305	6.3322	-0.592182	9.02715e-09
Smp_068440	23.3609	33.3331	-0.782564	10.8343	15.1021	13.2181	25.0086	24.6074	5.44655	56.8213	47.187	-0.491206	37.2909	54.6251	31.8667	43.7024	43.6828	17.6842	29.9291	16.6639	22.0202	-0.591878	6.80262e-07
Smp_127620	14.0454	17.0389	-1.04769	4.57663	8.92251	7.2001	16.0803	16.7389	2.31866	20.7912	16.5686	-0.551859	12.1258	20.3377	12.1296	17.5247	16.1361	5.91891	11.3211	6.38292	8.04769	-0.588536	1.92487e-07
SmVG_008325:Smp_146060	9.79493	13.6675	-0.874088	4.50416	8.39875	6.84185	11.3235	11.1119	2.32895	39.3015	25.8922	-0.712132	27.1275	46.5614	23.9561	34.2163	33.9447	13.3372	26.2036	12.698	16.1859	-0.587824	0.000127764
SmVG_008325:Smp_146070	9.79493	13.6675	-0.874088	4.50416	8.39875	6.84185	11.3235	11.1119	2.32895	39.3015	25.8922	-0.712132	27.1275	46.5614	23.9561	34.2163	33.9447	13.3372	26.2036	12.698	16.1859	-0.587824	0.000127764
Smp_132560	9.89811	12.1538	-0.840711	2.74361	6.01122	3.77409	8.30478	8.87463	1.43333	15.8758	10.0188	-0.516335	8.27464	15.1606	7.50163	10.5901	10.4151	3.97456	8.37601	3.9544	4.62933	-0.585934	0.000179767
Smp_031000	17.3937	22.209	-0.60744	8.41752	16.1882	12.3719	18.4325	21.6833	4.39722	46.8347	33.7819	-0.532592	27.4604	45.3497	26.8673	35.769	35.0694	13.5511	25.3739	14.3689	16.6865	-0.584736	2.01084e-06
Smp_156950	9.26622	10.9133	-0.358867	3.68345	6.31528	5.03333	7.24776	7.17599	1.87391	9.72252	8.2478	-0.501129	6.76229	10.1691	5.89871	8.75951	8.35374	3.31434	5.74681	3.0972	4.17358	-0.58465	1.31059e-06
Smp_194590	13.3995	13.9104	-0.85549	6.17494	13.3682	12.1353	16.4933	16.4785	3.08358	25.4575	20.5667	-0.652167	22.6521	35.6632	22.2839	29.244	29.1831	10.8748	19.6176	11.5622	14.5352	-0.584586	9.72358e-09
Smp_095910	62.2788	77.9586	-0.628654	47.0177	54.741	47.1689	68.7475	69.8276	23.6348	91.7602	62.9915	-0.582913	84.1126	116.451	66.0912	85.6391	86.493	40.7934	64.2922	34.7944	39.8485	-0.582857	0.000107047
Smp_167550	32.6436	39.2372	-0.537781	15.618	22.6733	20.3066	28.7177	27.4849	7.78207	72.8076	55.2753	-0.565591	52.5524	78.3665	45.9583	67.0756	62.7905	25.6252	43.5913	24.0043	29.8874	-0.582589	1.12665e-07
Smp_131030	9.53196	10.4751	-0.622455	4.46924	6.95877	5.5003	9.41602	11.1444	2.45754	8.67318	9.23511	-0.569659	6.48579	10.5241	6.61681	10.6358	10.128	3.41526	6.27361	3.74191	5.90879	-0.582584	1.61215e-06
Smp_176440	16.1783	21.2733	-0.763331	7.06473	10.4455	10.2428	15.3977	16.43	3.53604	37.8229	26.6986	-0.549614	23.2075	36.055	18.4986	27.0226	28.0277	11.2642	19.9522	9.73491	13.0534	-0.581076	1.15047e-05
SmVG_024146:Smp_071600.1	44.634	53.5268	-0.494641	29.0549	37.5233	29.6248	40.4442	44.3779	14.4221	82.4722	55.1768	-0.62167	65.8719	94.6044	59.3748	80.2967	71.8132	32.1653	52.7578	30.8833	33.8994	-0.579555	2.62403e-06
SmVG_024146:Smp_071600.2	44.634	53.5268	-0.494641	29.0549	37.5233	29.6248	40.4442	44.3779	14.4221	82.4722	55.1768	-0.62167	65.8719	94.6044	59.3748	80.2967	71.8132	32.1653	52.7578	30.8833	33.8994	-0.579555	2.62403e-06
SmVG_024146:Smp_071630	44.634	53.5268	-0.494641	29.0549	37.5233	29.6248	40.4442	44.3779	14.4221	82.4722	55.1768	-0.62167	65.8719	94.6044	59.3748	80.2967	71.8132	32.1653	52.7578	30.8833	33.8994	-0.579555	2.62403e-06
SmVG_018935:Smp_143980	8.37298	12.3333	-1.22157	2.92183	5.41946	4.73962	11.389	10.9614	1.50557	31.4284	22.8353	-0.513376	19.5942	32.6556	18.316	25.4462	26.4799	9.72188	18.4587	9.7543	12.0644	-0.578689	2.47472e-06
SmVG_018935:Smp_143990	8.37298	12.3333	-1.22157	2.92183	5.41946	4.73962	11.389	10.9614	1.50557	31.4284	22.8353	-0.513376	19.5942	32.6556	18.316	25.4462	26.4799	9.72188	18.4587	9.7543	12.0644	-0.578689	2.47472e-06
Smp_070920	31.5793	35.2987	-0.559075	15.8099	26.1449	20.4739	28.274	32.7926	8.62023	35.0768	27.6953	-0.536553	33.5874	40.5034	23.5413	33.5074	36.1171	16.7593	23.1304	12.7746	17.5509	-0.578094	4.03251e-05
Smp_002280	24.719	31.7212	-0.589817	13.8465	19.8435	15.3394	23.6099	24.4821	6.91902	41.487	29.1709	-0.576769	30.1005	48.5887	27.9716	35.2841	36.4875	14.4145	26.5494	14.5583	16.7483	-0.577899	1.31371e-05
SmVG_002622:Smp_147990.1	17.2107	21.1355	-0.823032	7.9698	14.8236	10.4049	18.532	19.5908	3.94042	20.3081	10.8573	-0.59893	15.1706	25.7947	15.37	17.5962	19.8487	7.24863	14.1375	7.86134	7.54744	-0.57675	0.000122349
SmVG_002622:Smp_147990.2	17.2107	21.1355	-0.823032	7.9698	14.8236	10.4049	18.532	19.5908	3.94042	20.3081	10.8573	-0.59893	15.1706	25.7947	15.37	17.5962	19.8487	7.24863	14.1375	7.86134	7.54744	-0.57675	0.000122349
SmVG_002622:Smp_147990.3	17.2107	21.1355	-0.823032	7.9698	14.8236	10.4049	18.532	19.5908	3.94042	20.3081	10.8573	-0.59893	15.1706	25.7947	15.37	17.5962	19.8487	7.24863	14.1375	7.86134	7.54744	-0.57675	0.000122349
SmVG_002622:Smp_148000	17.2107	21.1355	-0.823032	7.9698	14.8236	10.4049	18.532	19.5908	3.94042	20.3081	10.8573	-0.59893	15.1706	25.7947	15.37	17.5962	19.8487	7.24863	14.1375	7.86134	7.54744	-0.57675	0.000122349
Smp_172390	9.0127	12.9728	-0.387877	4.06913	5.971	4.84592	6.41955	7.69251	2.05562	14.7503	11.0813	-0.588398	9.59639	15.6545	9.18725	12.4357	11.8085	4.65873	8.72286	4.79932	5.95754	-0.572727	4.56027e-07
Smp_150470	4.62219	4.96343	-0.584239	1.64106	2.97145	1.95196	3.63015	4.05497	0.884119	7.42011	5.55017	-0.463051	4.02703	8.12783	3.26836	5.31892	5.11114	1.9857	4.48162	1.70244	2.92719	-0.572659	0.00351815
SmVG_012602:Smp_138440	7.40485	8.00724	-0.750305	2.09987	4.89557	3.28496	6.05308	6.36632	1.14171	12.8148	10.9973	-0.551469	10.5955	13.6195	7.29809	11.4901	11.8737	5.42686	7.77648	4.0381	6.12229	-0.572638	7.14194e-05
SmVG_012602:Smp_138450	7.40485	8.00724	-0.750305	2.09987	4.89557	3.28496	6.05308	6.36632	1.14171	12.8148	10.9973	-0.551469	10.5955	13.6195	7.29809	11.4901	11.8737	5.42686	7.77648	4.0381	6.12229	-0.572638	7.14194e-05
Smp_163980	4.04364	5.78373	-0.52936	1.088	1.90908	1.49625	3.1819	3.20968	0.721602	6.33534	4.9586	-0.463625	3.02164	4.42056	2.06056	4.40707	4.30459	1.85118	2.91313	1.59865	2.0692	-0.572474	3.25328e-06
Smp_018760	30.6419	38.6692	-0.657953	14.2101	22.2664	21.6102	30.0425	31.2789	7.21282	41.9192	37.4438	-0.592159	30.9501	45.6283	37.5618	43.3851	41.1903	15.0953	25.4423	19.8276	20.6698	-0.571844	1.41917e-09
Smp_173330	18.3239	20.233	-0.846491	5.97955	11.5321	8.38734	14.5232	16.9929	3.03981	26.3223	20.522	-0.510873	15.2572	25.1804	14.4809	19.8987	18.9371	7.38868	13.9099	7.62434	10.0078	-0.5712	9.45767e-07
Smp_162510	3.31245	4.1031	-1.30945	1.55472	3.61235	2.67301	6.8103	7.22767	0.808978	10.3638	7.6364	-0.645637	10.3904	15.8144	9.87761	13.8194	13.7774	5.09738	8.92171	5.27856	6.92995	-0.569366	4.3028e-09
Smp_164880	11.9404	13.7131	-0.761963	9.94791	15.8053	12.9813	22.2069	22.1715	5.15559	27.428	29.1152	-0.528883	23.6182	32.9544	22.3014	31.3507	28.9531	11.534	18.3373	11.8439	17.0734	-0.56832	7.71358e-09
Smp_133270	25.2163	29.312	-0.959107	11.7424	20.3129	19.6595	31.2398	32.7373	6.08625	33.4436	29.975	-0.580418	24.8256	39.4121	29.3492	36.4751	34.3539	12.391	22.1201	15.8536	17.8841	-0.567779	2.09967e-10
Smp_123180	20.1706	27.4692	-0.671306	8.22867	13.6206	10.7139	18.6636	19.6973	4.24744	45.8852	38.269	-0.454382	33.9595	49.2167	26.8863	38.7404	40.1745	16.8387	27.7017	14.4232	19.6188	-0.567367	6.04086e-06
Smp_018460	21.3253	24.0927	-0.40428	11.4587	15.0253	12.2385	16.0692	18.2552	6.05401	17.871	14.9066	-0.536203	14.6932	19.6027	12.7203	16.8697	18.1002	7.352	11.1548	7.09436	9.10071	-0.567132	2.75112e-07
Smp_165800	3.37185	4.18693	-0.745844	1.55368	2.74956	3.23395	4.31277	4.28816	0.795985	11.3403	11.9695	-0.532833	9.58941	13.1893	10.125	13.6274	12.7947	4.71932	7.37579	5.53783	7.11792	-0.565938	4.07416e-11
SmVG_002359:Smp_067120	40.0116	46.9368	-0.526122	15.4755	26.119	23.7471	31.9879	34.1151	7.83236	43.1917	46.6538	-0.489486	33.5686	45.3879	40.5794	49.7341	44.9103	16.2534	25.1616	21.1987	24.0504	-0.565875	2.23342e-10
SmVG_002359:Smp_159070.1	40.0116	46.9368	-0.526122	15.4755	26.119	23.7471	31.9879	34.1151	7.83236	43.1917	46.6538	-0.489486	33.5686	45.3879	40.5794	49.7341	44.9103	16.2534	25.1616	21.1987	24.0504	-0.565875	2.23342e-10
SmVG_002359:Smp_159070.2	40.0116	46.9368	-0.526122	15.4755	26.119	23.7471	31.9879	34.1151	7.83236	43.1917	46.6538	-0.489486	33.5686	45.3879	40.5794	49.7341	44.9103	16.2534	25.1616	21.1987	24.0504	-0.565875	2.23342e-10
SmVG_002359:Smp_159070.3	40.0116	46.9368	-0.526122	15.4755	26.119	23.7471	31.9879	34.1151	7.83236	43.1917	46.6538	-0.489486	33.5686	45.3879	40.5794	49.7341	44.9103	16.2534	25.1616	21.1987	24.0504	-0.565875	2.23342e-10
Smp_083040	44.3342	56.2348	-0.413911	21.3666	29.574	23.3175	33.7766	33.6982	10.7804	82.5573	66.6515	-0.531991	51.0973	80.7198	49.0782	69.5884	61.589	24.9596	45.0769	25.8453	33.3893	-0.56526	1.45774e-07
SmVG_029614:Smp_149500	8.01042	9.35102	-0.628813	5.02668	6.87415	5.43444	8.41138	8.65007	2.56386	13.3657	9.89802	-0.582702	12.1245	17.1381	10.4556	13.7195	13.656	5.96949	9.56296	5.49898	6.27609	-0.563831	4.28008e-06
SmVG_029614:Smp_166210	8.01042	9.35102	-0.628813	5.02668	6.87415	5.43444	8.41138	8.65007	2.56386	13.3657	9.89802	-0.582702	12.1245	17.1381	10.4556	13.7195	13.656	5.96949	9.56296	5.49898	6.27609	-0.563831	4.28008e-06
Smp_088990	9.52758	12.3991	-1.06053	3.28442	5.9754	4.01407	9.62627	10.6247	1.71977	21.55	19.8762	-0.485795	14.5904	20.1488	13.9333	18.3234	18.8132	7.42433	11.7265	7.59831	9.39863	-0.563738	1.13601e-08
Smp_194610	1.57734	1.95276	-1.12883	0.596135	1.08245	1.02805	2.04049	1.73801	0.347062	5.42716	4.5997	-0.609117	3.64938	5.04609	2.69649	4.22719	4.69684	2.02628	3.19677	1.61248	2.52791	-0.563128	0.000143158
Smp_043650	21.9664	29.4199	-0.616835	13.0697	12.0174	12.7694	19.4776	17.9566	7.11656	177.099	168.528	-0.548238	110.999	149.035	101.005	150.811	132.67	57.9806	88.1268	58.3712	79.2421	-0.562641	1.57072e-07
SmVG_029200:Smp_169450	10.8504	14.7018	-0.99725	5.56872	8.57697	5.25424	13.1523	14.4781	2.87923	30.8404	17.2236	-0.584371	19.3758	35.6037	17.6621	23.9031	25.3309	9.59499	20.0936	9.42364	10.9245	-0.561467	0.000377896
SmVG_029200:Smp_177920	10.8504	14.7018	-0.99725	5.56872	8.57697	5.25424	13.1523	14.4781	2.87923	30.8404	17.2236	-0.584371	19.3758	35.6037	17.6621	23.9031	25.3309	9.59499	20.0936	9.42364	10.9245	-0.561467	0.000377896
SmVG_011514:Smp_066290	11.9264	16.5906	-0.400863	3.81678	7.90882	7.40308	9.70726	10.0726	2.1294	21.5346	19.1592	-0.550289	13.1275	20.6255	12.193	19.9946	19.2605	7.21136	12.9895	7.29832	10.8075	-0.561182	2.58464e-06
SmVG_011514:Smp_126550	11.9264	16.5906	-0.400863	3.81678	7.90882	7.40308	9.70726	10.0726	2.1294	21.5346	19.1592	-0.550289	13.1275	20.6255	12.193	19.9946	19.2605	7.21136	12.9895	7.29832	10.8075	-0.561182	2.58464e-06
SmVG_011514:Smp_157980	11.9264	16.5906	-0.400863	3.81678	7.90882	7.40308	9.70726	10.0726	2.1294	21.5346	19.1592	-0.550289	13.1275	20.6255	12.193	19.9946	19.2605	7.21136	12.9895	7.29832	10.8075	-0.561182	2.58464e-06
Smp_172240	9.18835	12.6773	-0.379483	5.07591	6.17067	4.89764	7.20539	6.36439	2.71967	16.8228	14.6563	-0.582661	13.1	16.7496	10.3297	15.8276	14.8936	6.69184	9.48701	5.81437	7.55455	-0.560979	2.11124e-07
Smp_137450	30.1594	32.1075	-0.451936	14.2995	20.1731	18.5742	30.8807	45.541	12.2345	27.4344	26.2845	-0.534373	23.5772	28.6097	23.9378	41.5633	41.4652	16.6057	22.4799	17.2089	21.5184	-0.559902	9.6815e-10
Smp_139070	12.8446	13.3043	-0.547545	5.57698	9.34693	8.13881	11.9474	12.0907	2.98437	41.182	30.7968	-0.465712	26.9743	45.8738	24.4186	40.6437	33.8612	13.7994	26.5991	13.6508	17.7688	-0.559345	3.25587e-05
Smp_176600	9.87417	11.5106	-0.433419	4.95083	7.88748	6.84504	9.87239	9.75886	2.55364	12.3411	9.29276	-0.5516	9.08294	15.1937	9.1038	11.8194	11.8794	4.53819	8.55679	4.87916	5.7031	-0.556139	4.24212e-06
Smp_180150	3.4819	5.70025	-0.700774	1.5862	2.37259	2.11057	3.76063	3.97628	0.82362	7.85899	8.04181	-0.491794	7.07932	7.89034	5.29677	8.72933	7.7283	3.49711	4.44102	2.83172	4.2069	-0.555982	3.88012e-07
Smp_210790	35.7882	44.5349	-0.434416	17.2147	31.8526	19.5162	33.7392	34.3695	8.90846	62.4233	49.597	-0.481129	54.8096	85.3864	54.5364	71.0348	67.6609	27.1292	48.255	29.3315	34.4989	-0.554114	9.70855e-08
Smp_154420	52.4321	63.004	-0.566806	22.6874	39.8639	29.7029	48.1049	44.5192	11.1676	87.6699	59.9984	-0.56562	59.1391	97.8512	54.1337	73.1329	71.306	28.0759	53.384	27.76	34.2013	-0.552727	5.22271e-05
Smp_194070	6.20259	8.47697	-0.559086	1.95282	3.39014	2.74478	4.82731	6.64899	1.20098	8.74234	7.07212	-0.503209	5.23178	7.62049	4.96644	7.31347	7.06888	3.00929	4.85183	3.03179	3.22687	-0.552359	8.01889e-07
Smp_128810	12.9884	17.8693	-0.933934	4.77164	7.48189	5.54476	12.4929	12.7181	2.49311	26.1875	20.1038	-0.500278	14.9683	23.9692	13.6726	19.8269	18.8043	7.42029	13.5329	7.35308	9.52865	-0.552251	1.22413e-06
Smp_123670	42.6135	56.608	-0.702833	17.9582	32.5339	23.9756	44.8668	46.5065	8.97254	85.5593	70.593	-0.391735	59.5785	105.761	67.187	81.7196	83.713	29.1596	58.9484	35.1564	39.0138	-0.550773	1.9014e-06
Smp_014780	46.0411	66.2944	-0.33212	28.0498	36.6186	26.4536	43.6966	41.8587	14.6367	170.43	101.814	-0.48466	115.246	205.69	84.5296	132.46	133.263	57.1909	115.884	45.5544	59.9046	-0.547241	0.00505282
Smp_047190	14.0617	18.1494	-0.627025	5.05561	9.26585	6.52116	12.0397	13.907	2.60999	19.9656	13.7571	-0.411532	12.2431	20.3399	10.505	14.707	14.4903	6.04479	11.3051	5.55918	6.85539	-0.547097	0.000184526
SmVG_001478:Smp_196220	26.7134	31.7989	-1.164	12.4684	19.126	16.5635	39.6687	37.6276	6.49419	32.6733	24.2631	-0.468816	25.4157	37.7094	22.2176	28.1801	30.7972	13.0658	21.9363	12.2287	14.5128	-0.546509	4.64859e-05
SmVG_001478:Smp_197020	26.7134	31.7989	-1.164	12.4684	19.126	16.5635	39.6687	37.6276	6.49419	32.6733	24.2631	-0.468816	25.4157	37.7094	22.2176	28.1801	30.7972	13.0658	21.9363	12.2287	14.5128	-0.546509	4.64859e-05
SmVG_031728:Smp_080620	4.95431	4.78654	-0.719982	1.63844	3.14036	2.18215	4.14118	4.16839	0.837877	11.335	9.35264	-0.453134	5.33235	10.7411	6.48435	8.98612	8.21938	2.59753	5.95689	3.33879	4.29291	-0.54574	1.03534e-05
SmVG_031728:Smp_165610	4.95431	4.78654	-0.719982	1.63844	3.14036	2.18215	4.14118	4.16839	0.837877	11.335	9.35264	-0.453134	5.33235	10.7411	6.48435	8.98612	8.21938	2.59753	5.95689	3.33879	4.29291	-0.54574	1.03534e-05
Smp_198970	12.9301	17.0724	-0.395097	6.76359	9.85178	7.91643	11.8631	10.6119	3.51027	44.4243	33.8676	-0.42605	28.0673	50.2167	30.1815	42.5487	39.0262	14.0038	28.1948	16.1252	19.2925	-0.545443	1.68304e-05
Smp_158600	56.1628	77.0393	-0.7959	22.4929	38.6051	30.9886	52.9871	58.4816	11.3894	70.1115	47.5903	-0.573762	43.6528	70.7389	46.1298	55.956	55.9037	21.2061	39.0579	24.0355	25.5076	-0.545002	1.07843e-06
Smp_166400	7.87586	9.07334	-0.51955	3.39752	5.39735	4.94923	6.28177	7.06435	1.54242	15.9123	15.9292	-0.481724	12.5785	16.1081	11.4524	15.2205	13.2526	5.64767	8.50468	5.79069	7.55703	-0.542538	2.28157e-10
Smp_096790	182.954	294.613	-0.628354	108.007	100.343	189.788	195.274	195.918	59.1226	526.568	684.095	-0.522502	397.575	456.346	438.328	510.334	535.487	210.11	271.235	249.497	319.998	-0.541821	4.58159e-05
Smp_213890	34.4464	45.1934	-0.512169	22.7591	30.9172	27.5997	38.0452	36.2263	11.0269	58.584	56.141	-0.550095	57.8227	72.8865	40.5695	61.4003	60.4064	26.9383	39.5048	20.6062	33.6367	-0.541565	0.000170361
Smp_163130	39.6279	56.0733	-0.456019	16.4835	24.8414	19.2887	30.464	30.4076	8.76593	64.697	44.1903	-0.502306	38.1052	61.2414	43.1592	53.3014	50.5837	19.1674	34.9255	23.675	22.13	-0.541419	4.84778e-06
Smp_156590	27.4689	38.7725	-0.465944	15.2481	23.0708	22.3697	30.5731	28.204	7.7768	49.7654	46.0758	-0.492077	33.8544	61.0489	45.2429	55.1396	51.8174	16.5273	33.7646	23.873	28.3721	-0.541088	9.17148e-07
Smp_143830	17.4036	19.2492	-0.659007	8.71135	13.7186	10.0234	15.5932	16.4464	4.67905	18.186	16.4632	-0.4714	18.8012	21.347	12.9607	18.8547	20.9987	9.64284	12.4841	7.31911	10.649	-0.538772	3.56405e-05
Smp_013440	137.613	168.177	-0.324469	51.8793	87.5575	61.1304	68.8667	107.222	28.1965	27.2713	16.4787	-0.538353	17.1802	25.9042	16.2166	18.6315	20.5512	8.8704	15.1539	9.12167	9.24726	-0.538593	0.000682254
Smp_138290	5.17673	8.07563	-1.10324	1.96516	3.31487	1.83629	5.01479	5.07999	1.07066	30.7934	16.4938	-0.451376	14.3105	26.896	10.2243	17.7168	16.4803	7.18068	15.4304	5.56917	7.63277	-0.53853	0.00884565
Smp_136260	28.569	35.2593	-0.413011	22.2441	34.4123	25.1172	31.055	36.3601	11.2315	25.8909	18.7847	-0.636186	30.0551	46.4985	28.0109	34.4885	36.5736	14.642	25.7369	14.7058	17.2756	-0.536447	2.12917e-05
Smp_094950	6.38619	7.30698	-0.4636	2.93364	4.85797	4.94059	6.58829	6.90458	1.50051	11.0142	11.0277	-0.380752	9.63092	13.2376	10.9616	13.5996	13.3562	4.74747	7.37552	5.86326	6.48533	-0.536111	4.97993e-08
Smp_142520	3.49612	4.00773	-0.505618	1.42249	2.66449	2.42844	3.36744	3.24283	0.769162	5.79213	4.94867	-0.51106	4.47081	6.71033	5.04423	6.50417	5.88987	2.27365	3.91313	2.75736	2.91412	-0.535601	5.34199e-08
Smp_022630	8.29456	11.9416	-0.808556	4.80034	6.05372	4.94698	11.2681	11.2524	2.69632	30.842	25.5968	-0.505999	21.7651	32.5586	17.7345	30.6077	31.7604	12.4297	20.5298	11.8751	15.5592	-0.5334	2.12575e-07
Smp_094420	110.868	121.862	-0.360712	65.7307	92.1289	61.9383	101.52	110.379	35.0885	143.871	100.553	-0.41966	103.716	190.008	120.619	147.228	139.991	52.7631	108.073	66.9184	64.4063	-0.53087	5.80923e-05
Smp_159730.1	18.3543	27.7362	-0.598294	8.86042	11.4389	10.271	17.347	17.1038	4.33428	44.9474	42.2124	-0.499939	34.4502	43.766	29.4421	38.7321	38.0994	16.4272	23.7457	15.5587	20.0933	-0.530776	3.4547e-08
Smp_212140	1.27765	1.61168	-0.768484	0.487501	1.14029	0.986576	1.47986	1.72627	0.272196	1.45783	1.20004	-0.550038	1.23188	2.22296	1.22332	2.01182	1.64166	0.704242	1.34713	0.746159	0.953006	-0.530553	0.000432369
SmVG_029163:Smp_086920	3.66693	3.66258	-0.777991	2.17865	4.15989	3.33986	4.81659	5.2092	1.18411	5.48503	3.58598	-0.724475	5.69738	9.14884	4.84554	7.2151	7.13835	2.98461	5.40573	2.8221	3.68443	-0.529708	3.4961e-05
SmVG_029163:Smp_169400	3.66693	3.66258	-0.777991	2.17865	4.15989	3.33986	4.81659	5.2092	1.18411	5.48503	3.58598	-0.724475	5.69738	9.14884	4.84554	7.2151	7.13835	2.98461	5.40573	2.8221	3.68443	-0.529708	3.4961e-05
Smp_149370	7.75335	8.04072	-0.515792	1.8703	4.01882	3.22325	4.43783	5.32682	1.05405	11.2654	10.2192	-0.554134	7.04249	9.29659	5.86162	10.1788	9.86102	3.92222	5.87175	3.57312	5.19096	-0.529515	2.16154e-05
Smp_144840	78.4038	87.2647	-0.402467	29.3265	43.3864	33.5415	42.1209	54.2069	15.0062	66.6674	56.0123	-0.500965	43.3685	56.3765	34.7185	44.3892	46.0091	21.3531	31.7976	18.5066	24.8619	-0.526125	1.78521e-05
Smp_153840	7.30935	9.02829	-0.806663	2.33311	4.80848	4.14072	7.17072	7.85527	1.18787	11.6198	11.0455	-0.416174	7.48981	11.4435	7.9612	10.6158	9.62038	3.67693	6.39639	4.21093	5.79787	-0.525927	5.70109e-09
SmVG_022208:Smp_164270	1.70599	2.1999	-0.526882	0.634573	0.82522	0.94612	1.53786	1.58326	0.359339	3.41596	4.60565	-0.438979	2.55338	2.5392	1.93087	3.57806	3.29463	1.4814	1.72873	1.46386	2.08655	-0.52314	3.26769e-06
SmVG_022208:Smp_198340	1.70599	2.1999	-0.526882	0.634573	0.82522	0.94612	1.53786	1.58326	0.359339	3.41596	4.60565	-0.438979	2.55338	2.5392	1.93087	3.57806	3.29463	1.4814	1.72873	1.46386	2.08655	-0.52314	3.26769e-06
Smp_065130	4.30411	5.89543	-0.514102	3.10445	5.80717	5.20908	6.08514	6.77988	1.59431	5.93929	5.75659	-0.514005	8.271	11.2823	8.57123	11.0627	9.99139	4.07959	6.39202	4.62638	5.39789	-0.516951	6.13866e-09
Smp_142890	6.56096	5.67296	-0.746727	2.16724	4.99503	4.77033	5.91076	6.6695	1.13948	9.7895	8.598	-0.491298	7.79647	10.6452	7.17022	10.0525	9.1011	3.94915	6.1364	3.95459	5.4963	-0.515934	2.97581e-07
Smp_026510	21.4017	23.8334	-0.332798	7.70796	12.0303	7.41722	12.4949	11.5655	4.28504	26.3757	22.3574	-0.433818	15.333	22.8867	14.4247	20.2568	19.0699	8.2219	13.3963	8.37704	10.2389	-0.514496	2.98433e-07
Smp_154650	17.9795	26.1749	-0.369903	6.80601	10.5257	10.3286	13.8127	12.6481	3.48891	35.9036	28.4753	-0.448224	22.3393	31.9311	18.7656	26.245	25.354	11.0434	18.0045	10.0521	12.9608	-0.513699	4.50274e-06
Smp_179880	1.00538	1.21147	-0.832482	0.332056	0.81903	0.713157	1.41055	1.47227	0.268978	2.95772	3.05401	-0.46885	3.0426	3.70442	2.40723	4.91203	4.04589	1.70424	2.74263	1.77706	2.40098	-0.513183	4.27395e-07
Smp_058980	18.4207	24.9597	-0.70923	11.8948	16.9847	12.661	22.759	23.4003	5.91569	44.1031	30.436	-0.471234	33.5879	57.5461	32.9071	41.9918	41.2402	16.2086	31.7926	17.2002	19.6675	-0.512671	5.62004e-05
Smp_212490	7.06759	9.05075	-0.871753	2.73223	4.44813	3.33133	7.7011	8.82879	1.54723	15.2568	10.3732	-0.543277	7.60767	15.3107	8.54478	12.8762	12.2052	4.45763	9.45246	5.3554	6.27296	-0.511069	5.83933e-05
Smp_176360	4.41627	4.58814	-0.44516	1.89661	3.16672	2.44351	2.99741	3.51537	1.0009	5.83774	5.35231	-0.49147	4.62536	5.80187	3.41996	5.1665	4.80408	2.31994	3.35404	1.90117	2.86329	-0.509911	2.2512e-05
Smp_072890	7.85602	9.7628	-0.463063	2.81429	5.42853	4.35556	6.12855	6.75974	1.51374	8.25883	6.78965	-0.49992	5.92091	8.19119	5.02376	6.87235	6.91624	2.98105	4.69404	2.7605	3.65102	-0.509012	3.90334e-06
Smp_196690	26.1436	37.0302	-0.552938	11.503	15.5807	12.1995	21.429	19.9557	5.9236	54.6276	47.7715	-0.479469	38.9122	48.4764	32.0974	43.6811	40.4924	19.0897	27.4748	17.1858	21.807	-0.508859	5.59147e-07
Smp_140330	19.5185	23.4213	-0.616124	11.3837	15.2894	13.6135	22.5074	20.1392	5.92563	50.2416	30.4099	-0.416428	37.1875	60.932	23.7938	41.7991	40.2349	18.3569	34.4133	12.8373	18.6622	-0.508343	0.00657719
SmVG_001170:Smp_049450	5.14505	6.94417	-0.535448	1.94265	3.32987	2.67673	4.84404	4.26947	0.998963	10.7343	11.6687	-0.397972	7.89857	10.7054	8.01489	10.4992	9.69464	3.9013	5.97136	4.29395	5.81083	-0.507166	2.73673e-08
SmVG_001170:Smp_148600	5.14505	6.94417	-0.535448	1.94265	3.32987	2.67673	4.84404	4.26947	0.998963	10.7343	11.6687	-0.397972	7.89857	10.7054	8.01489	10.4992	9.69464	3.9013	5.97136	4.29395	5.81083	-0.507166	2.73673e-08
SmVG_001170:Smp_148610	5.14505	6.94417	-0.535448	1.94265	3.32987	2.67673	4.84404	4.26947	0.998963	10.7343	11.6687	-0.397972	7.89857	10.7054	8.01489	10.4992	9.69464	3.9013	5.97136	4.29395	5.81083	-0.507166	2.73673e-08
SmVG_001170:Smp_148620	5.14505	6.94417	-0.535448	1.94265	3.32987	2.67673	4.84404	4.26947	0.998963	10.7343	11.6687	-0.397972	7.89857	10.7054	8.01489	10.4992	9.69464	3.9013	5.97136	4.29395	5.81083	-0.507166	2.73673e-08
Smp_094380	4.75696	6.86076	-0.762846	2.04177	3.46787	2.60209	5.5295	6.75855	1.14393	10.8538	5.86148	-0.461512	6.50289	12.1219	4.32555	8.65161	8.24477	3.50217	7.40689	2.59377	3.57438	-0.506307	0.0185004
SmVG_007859:Smp_047410	24.3076	31.6872	-0.474268	8.25623	17.227	11.8568	17.8315	18.36	3.94038	31.2525	25.8257	-0.398734	18.1904	33.5961	23.8917	27.0664	26.763	8.41398	17.9478	12.0302	12.4275	-0.50594	2.2261e-05
SmVG_007859:Smp_047420	24.3076	31.6872	-0.474268	8.25623	17.227	11.8568	17.8315	18.36	3.94038	31.2525	25.8257	-0.398734	18.1904	33.5961	23.8917	27.0664	26.763	8.41398	17.9478	12.0302	12.4275	-0.50594	2.2261e-05
Smp_150280	3.43853	5.59196	-0.507067	1.70582	2.75545	2.69051	3.38577	3.83623	0.891989	4.15921	4.16392	-0.491862	3.4103	4.3406	2.33069	3.7751	3.33191	1.73346	2.48674	1.3015	2.16491	-0.50549	0.000632187
Smp_162630	70.9692	81.6815	-0.381292	37.932	56.9427	44.5997	59.855	60.7068	18.4426	103.929	70.6918	-0.462412	69.9955	121.983	72.8839	88.7927	83.3516	32.9063	66.1415	36.9158	39.967	-0.505099	0.000173106
Smp_149050	25.6435	35.1506	-0.557424	8.5075	16.9363	12.9651	17.9286	21.867	4.57916	39.1522	31.8732	-0.525804	22.0923	37.0927	23.1536	29.2195	30.178	11.1336	21.1453	12.8009	16.2682	-0.504256	1.53527e-06
Smp_134530	6.29766	9.99538	-0.852645	2.1333	3.65477	3.22811	6.1734	7.0302	1.12661	14.707	10.7394	-0.490778	8.67185	13.1336	7.33231	10.6012	10.6636	4.3192	7.50227	4.05315	5.1428	-0.502812	1.97564e-05
Smp_210090	3.40032	3.98239	-0.484994	1.90545	2.31788	1.84462	2.64735	2.79758	1.01163	4.99563	3.32075	-0.507418	2.77182	4.67285	2.57994	3.40451	3.52615	1.48774	2.79021	1.43212	1.68402	-0.502108	0.00455784
SmVG_020443:Smp_150390.1	10.945	12.8164	-0.476532	5.0579	8.85577	6.65521	9.85389	9.67126	2.67381	13.5233	10.5054	-0.455645	12.4674	16.5806	9.19913	13.4193	14.1288	6.41714	9.60039	5.06243	7.06781	-0.501489	0.000217725
SmVG_020443:Smp_150390.3	10.945	12.8164	-0.476532	5.0579	8.85577	6.65521	9.85389	9.67126	2.67381	13.5233	10.5054	-0.455645	12.4674	16.5806	9.19913	13.4193	14.1288	6.41714	9.60039	5.06243	7.06781	-0.501489	0.000217725
SmVG_020443:Smp_194110	10.945	12.8164	-0.476532	5.0579	8.85577	6.65521	9.85389	9.67126	2.67381	13.5233	10.5054	-0.455645	12.4674	16.5806	9.19913	13.4193	14.1288	6.41714	9.60039	5.06243	7.06781	-0.501489	0.000217725
SmVG_033617:Smp_142030	5.00984	5.47088	-0.808779	2.65888	4.57369	3.71215	5.37752	7.52804	1.37541	2.81226	2.55313	-0.426116	3.30507	4.2086	2.93932	3.7231	3.69966	1.65569	2.37401	1.60702	1.85251	-0.49936	8.63274e-06
SmVG_033617:Smp_212370	5.00984	5.47088	-0.808779	2.65888	4.57369	3.71215	5.37752	7.52804	1.37541	2.81226	2.55313	-0.426116	3.30507	4.2086	2.93932	3.7231	3.69966	1.65569	2.37401	1.60702	1.85251	-0.49936	8.63274e-06
Smp_131570	2.50462	2.9991	-0.544377	0.641332	0.967367	0.81429	2.0235	2.0642	0.53408	5.44227	6.02026	-0.454094	3.06501	3.52138	2.02493	5.26092	4.40976	2.00736	2.76341	1.87876	2.90007	-0.499104	8.84939e-07
Smp_008290	5.30616	5.94167	-0.847076	1.93895	3.31213	2.89957	4.53441	5.08585	0.984437	9.507	6.8968	-0.468254	5.81243	8.6973	4.83529	7.11456	6.49571	2.84298	4.85401	2.57412	3.26922	-0.498872	3.79534e-05
Smp_169200	24.5952	31.1047	-0.556335	13.2478	17.6999	13.4787	30.2909	29.7665	7.23362	69.9475	59.4624	-0.257525	63.764	93.2394	61.8325	85.1118	83.3598	32.8378	53.9146	34.9677	42.0962	-0.498528	1.96784e-07
Smp_180400	12.9236	13.3602	-0.570154	4.15773	7.719	5.96841	10.0014	10.3349	2.19759	17.7156	17.2319	-0.458495	11.1792	16.1935	11.6148	14.6211	14.4861	5.72832	9.27811	6.39421	8.2494	-0.497427	6.58929e-08
Smp_206070	10.4534	10.8431	-1.10908	1.12271	4.5634	4.87688	12.6158	14.2307	1.2503	26.6291	18.6359	-0.474417	10.9426	18.4861	9.83419	23.4964	23.6494	8.13107	16.1007	9.13878	10.0613	-0.497239	0.00375999
Smp_128000	3.76426	3.15256	-0.528905	4.88296	7.83179	7.06591	6.52057	7.80679	2.40182	4.58763	4.86241	-0.613146	10.8721	13.4718	10.3339	13.7328	12.5856	5.37744	7.54078	5.44377	7.79174	-0.496073	1.45509e-08
Smp_143730	12.555	13.8763	-0.949144	3.45205	7.83793	6.53993	11.2715	12.4764	1.70043	14.0541	13.1729	-0.496816	8.46568	13.615	9.02666	11.5684	11.3747	3.99163	7.44836	4.61166	6.32351	-0.495729	2.06686e-06
Smp_134910	3.06683	4.15598	-0.66069	1.56767	2.2566	1.98564	3.13873	3.91203	0.818047	6.00789	5.80823	-0.46149	4.66781	6.51331	4.04907	5.90653	5.17849	2.2219	3.62624	2.2096	3.11343	-0.495486	1.29622e-05
Smp_163420.1	19.6151	23.744	-0.606509	6.636	14.5668	13.0125	17.8547	21.2065	3.405	21.7238	19.0091	-0.438272	16.2204	23.4178	16.3744	20.8757	19.1848	7.99517	13.0614	8.81958	10.4281	-0.494165	3.5038e-07
Smp_040540	38.5786	36.4666	-0.372525	20.549	28.9278	24.2501	26.9286	32.3268	10.3083	29.0696	21.9581	-0.512611	19.2896	30.2445	17.9618	21.3317	22.9465	9.56621	17.1821	9.41588	11.9171	-0.493732	0.000176163
Smp_085410	13.6198	18.7559	-0.508741	4.46631	6.09023	5.1307	7.50415	8.90512	2.65218	24.7347	18.8329	-0.460486	11.9356	18.0341	11.3261	16.1696	15.7701	7.14517	11.879	7.22074	8.40018	-0.493535	4.42603e-05
Smp_146160	5.3104	5.25033	-0.603652	1.91248	3.51359	3.11572	4.55902	4.78642	0.950074	3.70231	3.60031	-0.440825	2.59136	3.77752	2.78785	3.57835	2.9882	1.24871	2.08311	1.46989	1.87768	-0.493512	2.61113e-05
Smp_130440	12.6479	13.5335	-0.680705	5.39905	10.9042	8.80113	10.493	13.0779	2.5633	17.2192	14.2406	-0.495345	11.9054	20.7365	14.882	16.2163	16.9665	5.64179	11.0145	7.56708	8.77519	-0.493199	4.09583e-06
Smp_044920	20.2309	25.8627	-0.455388	15.7594	24.5479	14.736	21.8225	23.2054	8.15615	22.7922	13.7938	-0.601263	22.2471	37.1983	21.4803	26.9571	26.986	11.0855	21.0163	11.6011	12.712	-0.493048	0.000126762
SmVG_007736:Smp_180910.1	13.624	18.629	-0.788202	5.00872	8.49643	6.39257	12.7885	13.9939	2.53625	18.9503	12.7149	-0.484646	10.5192	17.933	9.56929	13.6388	11.8454	5.13152	9.92654	5.03875	6.06045	-0.492909	0.000336811
SmVG_007736:Smp_180910.2	13.624	18.629	-0.788202	5.00872	8.49643	6.39257	12.7885	13.9939	2.53625	18.9503	12.7149	-0.484646	10.5192	17.933	9.56929	13.6388	11.8454	5.13152	9.92654	5.03875	6.06045	-0.492909	0.000336811
SmVG_007736:Smp_180920	13.624	18.629	-0.788202	5.00872	8.49643	6.39257	12.7885	13.9939	2.53625	18.9503	12.7149	-0.484646	10.5192	17.933	9.56929	13.6388	11.8454	5.13152	9.92654	5.03875	6.06045	-0.492909	0.000336811
Smp_048980	11.343	16.24	-0.522444	5.39384	7.94715	5.65929	10.4497	11.3471	2.80902	29.4766	20.8489	-0.409115	18.3952	30.2294	15.7785	21.5868	22.4363	9.13232	17.0059	8.52704	10.8144	-0.490728	0.000250328
Smp_089650	12.3305	13.5941	-0.528136	4.3788	10.3218	7.20572	8.48672	9.53603	2.16898	10.6064	10.285	-0.554477	8.03583	12.5401	7.87606	12.6223	9.115	3.94183	7.1016	4.1736	6.13115	-0.490203	0.000680059
SmVG_009034:Smp_023860	5.55542	6.76858	-0.688157	1.8424	3.88408	3.78865	5.51303	5.52189	0.967211	5.1004	4.42868	-0.393298	2.63175	5.25735	4.16703	4.48766	4.40807	1.31371	3.00954	2.2101	2.4534	-0.489974	0.000219658
SmVG_009034:Smp_135050	5.55542	6.76858	-0.688157	1.8424	3.88408	3.78865	5.51303	5.52189	0.967211	5.1004	4.42868	-0.393298	2.63175	5.25735	4.16703	4.48766	4.40807	1.31371	3.00954	2.2101	2.4534	-0.489974	0.000219658
SmVG_009034:Smp_135060	5.55542	6.76858	-0.688157	1.8424	3.88408	3.78865	5.51303	5.52189	0.967211	5.1004	4.42868	-0.393298	2.63175	5.25735	4.16703	4.48766	4.40807	1.31371	3.00954	2.2101	2.4534	-0.489974	0.000219658
SmVG_020234:Smp_164120	4.09139	5.50417	-1.31902	1.20475	2.39556	1.7106	5.1527	4.89793	0.641358	12.5558	9.02909	-0.434114	6.21302	11.1096	6.23357	8.79915	8.30109	3.1766	6.35242	3.43068	4.26062	-0.489935	5.50378e-05
SmVG_020234:Smp_164130	4.09139	5.50417	-1.31902	1.20475	2.39556	1.7106	5.1527	4.89793	0.641358	12.5558	9.02909	-0.434114	6.21302	11.1096	6.23357	8.79915	8.30109	3.1766	6.35242	3.43068	4.26062	-0.489935	5.50378e-05
SmVG_023246:Smp_007770	4.07182	4.3463	-0.571471	1.0552	2.43938	1.96731	3.55141	3.4047	0.573165	5.55686	5.58512	-0.459936	3.41628	5.53143	4.0901	5.70023	4.97189	1.79658	3.32354	2.30801	3.08027	-0.489777	9.20498e-05
SmVG_023246:Smp_182040	4.07182	4.3463	-0.571471	1.0552	2.43938	1.96731	3.55141	3.4047	0.573165	5.55686	5.58512	-0.459936	3.41628	5.53143	4.0901	5.70023	4.97189	1.79658	3.32354	2.30801	3.08027	-0.489777	9.20498e-05
Smp_139470	9.85627	9.10346	-0.503793	3.2539	6.87339	4.68113	6.25148	7.34378	1.6866	11.1091	8.52554	-0.484073	7.04374	11.8383	7.21152	9.78775	8.44047	3.423	6.549	3.78499	4.51446	-0.488346	2.67473e-05
SmVG_016099:Smp_170670	3.64137	4.28681	-0.604684	1.31687	2.21227	1.63891	2.82781	2.83432	0.642262	8.66602	7.19764	-0.418742	6.35172	8.26141	4.13001	7.03488	5.9555	2.9818	4.51719	2.401	3.30165	-0.486556	7.71716e-05
SmVG_016099:Smp_170680	3.64137	4.28681	-0.604684	1.31687	2.21227	1.63891	2.82781	2.83432	0.642262	8.66602	7.19764	-0.418742	6.35172	8.26141	4.13001	7.03488	5.9555	2.9818	4.51719	2.401	3.30165	-0.486556	7.71716e-05
Smp_041600	17.5023	17.5467	-0.808273	8.80024	16.8465	13.8431	19.8856	24.0997	4.4759	9.36699	7.98623	-0.503272	10.0808	12.8097	9.09779	11.5072	10.5782	4.90368	7.07963	4.8149	6.0947	-0.485895	8.58215e-07
Smp_016640	13.9405	14.509	-0.397015	6.67591	10.4414	6.5275	9.81867	10.4331	3.33234	19.5199	12.6442	-0.469029	15.3982	24.6325	13.0933	17.7395	16.7786	7.47191	13.6583	6.76264	7.71657	-0.483488	0.000721684
Smp_210080	4.85319	4.93742	-0.733071	3.16557	4.50597	3.47273	6.25807	6.99264	1.61091	3.61603	2.80876	-0.492987	3.37864	5.82216	4.09348	4.06367	4.14774	1.75865	3.42606	2.30615	2.17926	-0.482756	0.00757213
Smp_132620	13.0259	15.8609	-0.32613	5.99541	9.51496	7.04779	8.81094	10.2548	3.20533	14.7272	12.6963	-0.423909	10.0995	14.6696	8.95085	12.5752	12.2192	5.12766	8.43811	5.10719	6.75871	-0.481946	3.83296e-06
SmVG_018966:Smp_210120	3.99236	4.31182	-0.550625	2.03	3.35963	2.652	3.61626	4.13515	1.11554	8.98428	7.62161	-0.487828	8.92246	12.2488	7.0893	9.88007	9.99424	4.55967	7.06086	3.92966	5.41231	-0.480923	4.63324e-05
SmVG_018966:Smp_210130	3.99236	4.31182	-0.550625	2.03	3.35963	2.652	3.61626	4.13515	1.11554	8.98428	7.62161	-0.487828	8.92246	12.2488	7.0893	9.88007	9.99424	4.55967	7.06086	3.92966	5.41231	-0.480923	4.63324e-05
Smp_156880	15.8525	21.6994	-0.85482	11.64	20.0181	15.5429	25.6843	27.5835	5.95191	24.0364	18.6227	-0.707459	29.6641	41.8174	27.8703	36.0308	35.0625	14.8879	23.7607	15.313	20.0448	-0.48065	4.3223e-07
Smp_160420	33.992	44.1215	-0.671648	15.5025	26.8226	15.5621	31.7217	38.6919	8.69693	21.7925	13.9656	-0.446945	17.8603	23.5503	14.7377	19.269	19.6063	9.16161	13.9051	8.42505	9.16227	-0.47787	0.00209721
Smp_128050	15.6571	18.2817	-0.695922	5.47183	9.78192	6.62637	12.321	12.9041	2.68896	13.2248	9.37145	-0.476206	8.55169	12.2934	7.56291	9.1848	8.25325	4.04896	6.68899	3.83914	4.60352	-0.476672	0.000240719
Smp_008580	55.1569	64.0794	-0.348781	17.3827	33.5989	31.557	37.2587	37.8518	8.71838	52.2308	54.1369	-0.412896	34.7103	50.3979	40.7354	47.9178	44.9151	16.9552	28.1707	21.0979	24.8808	-0.475591	2.06098e-07
Smp_127920	4.23596	5.37337	-0.838116	1.55077	2.97393	2.35002	4.42642	4.79926	0.770442	12.2773	10.5757	-0.400472	8.08161	12.4901	6.97321	10.0987	9.19407	3.99824	7.10933	3.70728	5.10747	-0.474526	8.99886e-05
SmVG_024460:Smp_079140	3.99602	4.74754	-0.660461	1.52176	3.09562	2.02144	3.82128	4.06534	0.811053	11.2777	10.3699	-0.439694	7.8821	12.4755	8.59738	11.1763	10.366	3.93422	7.11265	4.7346	6.01635	-0.474136	2.71949e-07
SmVG_024460:Smp_164830	3.99602	4.74754	-0.660461	1.52176	3.09562	2.02144	3.82128	4.06534	0.811053	11.2777	10.3699	-0.439694	7.8821	12.4755	8.59738	11.1763	10.366	3.93422	7.11265	4.7346	6.01635	-0.474136	2.71949e-07
Smp_149200	29.8033	34.478	-0.514257	14.3135	22.1641	15.8707	24.0951	27.055	7.43148	36.5766	24.278	-0.437168	23.1183	38.4889	20.9925	25.5003	27.2118	11.382	21.5155	11.2757	13.4347	-0.472719	0.000891641
Smp_165350	15.5523	16.8516	-0.511594	2.97424	6.37494	4.40242	11.8217	12.9622	2.5469	25.9239	25.2653	-0.334196	11.2123	18.5153	8.05695	22.5006	21.468	9.27073	14.6818	9.52726	12.2761	-0.472301	5.74004e-06
Smp_134470	4.03731	5.42425	-0.730273	1.8796	2.66682	2.65105	4.23528	4.26601	0.989603	17.7542	16.4127	-0.380299	12.4958	17.6117	11.1783	14.906	13.8196	6.2052	9.99822	5.95566	8.04692	-0.470986	2.59064e-06
SmVG_016375:Smp_211000	2.29654	3.02827	-0.429504	0.761726	1.59211	1.69775	1.94665	1.78815	0.388939	3.40199	4.72042	-0.495416	3.23289	3.68457	3.49792	4.81931	3.70424	1.58232	2.06637	1.88496	2.53742	-0.469778	0.000281917
SmVG_016375:Smp_211010	2.29654	3.02827	-0.429504	0.761726	1.59211	1.69775	1.94665	1.78815	0.388939	3.40199	4.72042	-0.495416	3.23289	3.68457	3.49792	4.81931	3.70424	1.58232	2.06637	1.88496	2.53742	-0.469778	0.000281917
Smp_016840	10.8435	12.4064	-0.82254	3.5666	7.36322	5.85131	10.1738	10.879	1.81245	18.3363	15.052	-0.38679	13.3109	18.7154	12.2845	15.7757	14.6938	6.4484	10.4021	6.48011	7.86107	-0.468165	5.64233e-06
Smp_137870	10.1057	12.9414	-0.666274	6.56972	10.5923	11.0527	14.9177	15.5699	3.29649	14.4965	14.347	-0.417591	21.6499	26.1704	17.2494	22.2677	22.6716	10.3283	14.3914	8.9528	12.1028	-0.466983	4.16115e-06
Smp_140080	36.8484	39.1575	-0.551228	16.245	27.0453	20.3508	30.035	33.8558	8.2791	28.3607	24.4162	-0.408953	21.8905	31.3091	22.89	26.4545	24.8269	10.774	17.3884	12.1127	13.2708	-0.46684	4.12106e-07
Smp_186740	1.55202	1.68033	-0.812072	1.3976	2.63858	1.60802	2.79331	3.35955	0.72047	4.11939	3.17917	-0.518405	6.24997	9.85588	5.58023	7.43299	7.37119	3.08275	5.57164	2.96616	3.89564	-0.465416	0.000451727
SmVG_034131:Smp_125680	5.56723	7.50835	-0.723899	1.71022	3.54317	4.1104	5.24191	5.6532	0.874516	9.90164	10.5914	-0.400958	7.34995	9.83104	7.92965	8.53687	9.21092	3.55445	5.45706	4.13877	5.13816	-0.464598	8.64465e-07
SmVG_034131:Smp_191940	5.56723	7.50835	-0.723899	1.71022	3.54317	4.1104	5.24191	5.6532	0.874516	9.90164	10.5914	-0.400958	7.34995	9.83104	7.92965	8.53687	9.21092	3.55445	5.45706	4.13877	5.13816	-0.464598	8.64465e-07
Smp_197390	17.7574	18.3195	-0.596006	6.21409	11.3861	10.6735	12.8623	13.1117	3.07996	22.4295	16.5856	-0.419303	14.3157	21.1597	12.7197	16.4021	15.1568	6.91914	11.6352	6.62693	7.7847	-0.462711	3.78389e-05
Smp_001040	42.1744	60.8396	-0.477954	26.5207	31.1674	26.3183	39.6874	40.2789	13.5923	127.812	129.359	-0.382377	129.922	142.224	100.657	121.028	137.196	63.9792	79.6692	54.0216	75.0185	-0.461556	0.000154402
Smp_165280	19.1269	18.5166	-0.399679	9.55179	14.488	12.4547	15.4375	14.5972	4.52525	22.9257	22.5691	-0.433272	19.6444	25.4841	17.4618	22.6446	19.944	9.12183	13.6068	8.81563	12.0205	-0.461361	1.45176e-07
Smp_047900	24.543	32.8164	-0.350128	10.4478	14.4409	10.3463	17.3975	14.3493	5.31627	59.4902	49.4727	-0.43565	36.9957	53.1574	31.5015	42.7275	40.7121	18.1247	29.6914	16.8841	22.3635	-0.46107	2.36343e-05
Smp_063500	3.47495	3.99163	-0.623153	1.26497	2.34999	2.03018	2.67699	2.82487	0.63548	6.96043	5.94374	-0.466693	4.74315	6.85299	4.51909	6.0709	5.26071	2.27355	3.78536	2.33453	2.94788	-0.460162	3.10213e-07
Smp_148370	10.8833	10.6698	-0.758461	4.83246	9.44342	7.51934	10.7765	12.7839	2.4375	19.0363	12.8214	-0.46439	13.9018	23.837	13.429	16.2602	16.5557	6.74192	13.2028	7.12834	8.08031	-0.459664	0.000480047
Smp_131100	6.7536	8.08277	-0.809661	2.42307	5.12377	2.14184	5.6595	6.72045	1.2243	10.2993	6.00433	-0.378157	5.67645	11.0122	5.72406	7.16208	7.74862	2.77953	6.19993	3.06448	3.46235	-0.459286	0.00504418
Smp_016090	12.0162	15.5601	-0.511473	4.01686	7.62761	6.20821	9.60756	8.83094	1.9682	22.9326	17.8558	-0.429647	13.4143	21.6656	12.3903	15.6595	15.8821	6.42522	11.8391	6.3611	8.31011	-0.457721	0.00022865
Smp_150940	1.93849	2.27291	-1.02535	0.750847	1.34387	0.756132	1.89706	2.39678	0.400617	3.72589	2.8165	-0.463085	2.33176	3.69084	2.25537	2.80707	2.68338	1.16498	2.12153	1.20508	1.44762	-0.456659	0.000918881
SmVG_025481:Smp_075260	21.8656	26.3596	-0.512672	10.3349	20.6585	14.3258	19.3157	26.0942	5.43778	11.6107	8.21512	-0.400706	10.3449	15.4085	8.34743	11.1393	11.337	5.11765	8.78748	4.45281	5.66267	-0.456439	0.000585215
SmVG_025481:Smp_162780	21.8656	26.3596	-0.512672	10.3349	20.6585	14.3258	19.3157	26.0942	5.43778	11.6107	8.21512	-0.400706	10.3449	15.4085	8.34743	11.1393	11.337	5.11765	8.78748	4.45281	5.66267	-0.456439	0.000585215
Smp_150980	9.72821	9.89308	-0.412998	3.74583	6.38346	4.83661	6.69351	7.68353	1.90391	13.8357	12.0641	-0.366082	9.93389	13.8767	8.5943	11.3626	11.1698	4.85264	7.67418	4.72033	6.04894	-0.456336	3.89592e-06
Smp_171750	9.11605	11.1004	-0.461332	2.72438	4.94156	3.73709	5.78659	6.61759	1.51284	14.8799	15.3127	-0.406437	9.40883	13.2149	8.83418	11.8759	11.6947	4.92649	7.82312	5.17149	7.09067	-0.455641	1.22321e-06
SmVG_016262:Smp_050630	31.6884	39.0205	-0.426093	19.9145	37.5301	33.9842	38.9952	40.9023	10.0005	41.7319	41.3379	-0.469919	51.7805	70.5725	57.6395	70.5345	66.7447	24.9734	38.8887	30.0802	37.6854	-0.451766	1.46535e-06
SmVG_016262:Smp_050640	31.6884	39.0205	-0.426093	19.9145	37.5301	33.9842	38.9952	40.9023	10.0005	41.7319	41.3379	-0.469919	51.7805	70.5725	57.6395	70.5345	66.7447	24.9734	38.8887	30.0802	37.6854	-0.451766	1.46535e-06
Smp_083400	61.9626	72.0599	-0.318	29.0912	40.4684	39.1427	43.2736	49.4138	14.2522	81.6243	84.2828	-0.392592	67.311	83.9834	63.6911	76.909	74.3492	32.2826	46.1816	32.9026	41.6847	-0.451085	1.51371e-07
Smp_165030	10.9173	15.0743	-0.532428	5.28131	8.43941	7.00794	9.71215	9.93557	2.62486	23.4267	17.3588	-0.41314	18.1999	26.544	17.8718	20.9509	20.6298	8.67726	14.628	9.21518	9.77413	-0.44994	2.54367e-05
Smp_153410	29.4939	34.0378	-0.446121	15.481	20.8461	14.6796	22.0469	24.3276	7.82942	51.2627	33.6249	-0.418798	32.546	53.8257	28.5591	35.0587	36.011	15.5782	29.7747	14.7734	17.4743	-0.44963	0.00203607
SmVG_025189:Smp_045780	31.494	37.0965	-0.453967	13.1598	21.4738	16.8643	22.9724	25.2545	6.51039	42.0234	36.8813	-0.369788	29.0767	43.6549	27.9821	33.5593	33.3464	14.0342	24.1714	14.7164	18.6268	-0.448888	5.13879e-06
SmVG_025189:Smp_045790	31.494	37.0965	-0.453967	13.1598	21.4738	16.8643	22.9724	25.2545	6.51039	42.0234	36.8813	-0.369788	29.0767	43.6549	27.9821	33.5593	33.3464	14.0342	24.1714	14.7164	18.6268	-0.448888	5.13879e-06
SmVG_012614:Smp_030300.2	32.5991	48.6433	-0.394792	16.3263	24.4246	28.9527	31.8225	33.9155	8.23017	45.8491	51.6807	-0.359893	41.2559	53.2746	46.6769	50.6784	52.8604	20.1375	29.6704	24.7107	30.8175	-0.443883	1.06542e-05
SmVG_012614:Smp_030300.3	32.5991	48.6433	-0.394792	16.3263	24.4246	28.9527	31.8225	33.9155	8.23017	45.8491	51.6807	-0.359893	41.2559	53.2746	46.6769	50.6784	52.8604	20.1375	29.6704	24.7107	30.8175	-0.443883	1.06542e-05
SmVG_012614:Smp_030300.4	32.5991	48.6433	-0.394792	16.3263	24.4246	28.9527	31.8225	33.9155	8.23017	45.8491	51.6807	-0.359893	41.2559	53.2746	46.6769	50.6784	52.8604	20.1375	29.6704	24.7107	30.8175	-0.443883	1.06542e-05
SmVG_012614:Smp_145690	32.5991	48.6433	-0.394792	16.3263	24.4246	28.9527	31.8225	33.9155	8.23017	45.8491	51.6807	-0.359893	41.2559	53.2746	46.6769	50.6784	52.8604	20.1375	29.6704	24.7107	30.8175	-0.443883	1.06542e-05
Smp_213810	12.7261	13.2671	-0.798126	3.81683	8.09657	7.28877	10.5308	12.2515	1.98745	14.5966	10.396	-0.398027	8.16425	13.9577	8.20732	10.191	9.22619	4.00374	7.75354	4.3894	5.1396	-0.443745	0.000779702
Smp_129770	8.41244	11.4528	-0.36861	6.73689	9.87573	7.49322	9.85182	9.54254	3.43522	24.2039	16.363	-0.504003	21.3068	36.7453	21.7266	25.9103	25.9832	10.4087	20.6023	11.385	13.8101	-0.441111	0.000637242
SmVG_029391:Smp_170120	2.64045	3.87728	-0.449419	1.25241	1.80014	1.04567	2.24552	2.27222	0.672987	5.52108	4.68127	-0.338087	4.3608	5.24932	3.12894	4.21417	4.84227	2.29566	3.10777	1.74632	2.35675	-0.439423	0.00268286
SmVG_029391:Smp_170130	2.64045	3.87728	-0.449419	1.25241	1.80014	1.04567	2.24552	2.27222	0.672987	5.52108	4.68127	-0.338087	4.3608	5.24932	3.12894	4.21417	4.84227	2.29566	3.10777	1.74632	2.35675	-0.439423	0.00268286
SmVG_029391:Smp_170140	2.64045	3.87728	-0.449419	1.25241	1.80014	1.04567	2.24552	2.27222	0.672987	5.52108	4.68127	-0.338087	4.3608	5.24932	3.12894	4.21417	4.84227	2.29566	3.10777	1.74632	2.35675	-0.439423	0.00268286
Smp_154610	27.1776	27.7719	-0.640248	16.9204	32.8028	28.769	34.2371	41.6664	8.75201	14.6114	12.1737	-0.543107	22.0929	29.2989	24.1392	32.4514	29.117	11.945	17.5578	13.8046	17.3036	-0.438867	1.87372e-06
Smp_034000	14.6837	17.7914	-0.535233	6.34844	10.6128	8.65425	12.3788	12.8569	3.06639	23.2941	15.5756	-0.405973	15.197	24.9901	12.4855	16.5043	15.8982	7.11013	13.5245	6.29279	8.10888	-0.435917	0.00255204
Smp_033350	16.0649	18.8675	-0.383734	8.79356	12.293	12.4377	14.4112	15.8146	4.47819	17.6601	17.5944	-0.457567	16.8943	21.75	15.5993	17.6057	18.1783	8.28996	12.142	8.33452	10.8881	-0.435551	1.14613e-05
Smp_162040	85.8446	112.502	-0.612338	32.3163	52.9664	37.4492	66.2126	72.1468	16.2629	158.208	105.161	-0.324045	90.893	155.586	86.6816	108.621	105.434	43.8958	85.5224	44.7466	49.9078	-0.435276	0.00111627
Smp_058460	45.3911	42.5762	-0.447903	27.5088	41.1689	31.6543	40.499	47.8735	13.3705	37.302	27.6971	-0.409125	32.4079	50.203	32.5169	36.7303	36.3112	15.3214	27.2586	16.8605	17.4101	-0.434884	0.000111976
Smp_089100	11.3912	14.6121	-0.649943	5.57989	8.89925	5.20916	9.76202	10.3892	2.9426	23.3155	12.5906	-0.515927	15.3635	25.7775	14.4002	16.8366	16.4431	7.73156	14.6653	7.75358	7.76796	-0.434557	0.00509457
SmVG_019894:Smp_002230	33.6157	32.8543	-0.424609	16.5698	25.9563	20.1714	26.0747	28.0292	8.09494	29.2396	23.7732	-0.364121	25.6568	36.088	22.467	24.7837	27.0895	12.1052	19.6174	11.4735	14.457	-0.42921	0.000280427
SmVG_019894:Smp_123280	33.6157	32.8543	-0.424609	16.5698	25.9563	20.1714	26.0747	28.0292	8.09494	29.2396	23.7732	-0.364121	25.6568	36.088	22.467	24.7837	27.0895	12.1052	19.6174	11.4735	14.457	-0.42921	0.000280427
Smp_159750	4.67774	5.36496	-0.695592	1.29401	3.15331	2.40918	2.8351	4.05714	0.628196	6.23956	6.23735	-0.425149	4.65252	5.9029	3.94176	5.03277	4.88658	2.1844	3.25121	2.01123	2.92533	-0.429142	6.00378e-05
Smp_140200	10.7611	12.0998	-0.60182	7.67198	9.45397	6.5546	11.6797	12.6522	4.32523	31.247	21.2004	-0.4207	30.9199	43.8676	26.2204	35.8512	32.3659	16.4069	25.8996	14.9971	16.165	-0.427503	0.000659277
Smp_165200	30.3831	36.913	-0.616393	10.7893	21.5907	15.9822	23.8139	28.7135	5.67339	33.3298	26.9607	-0.367517	22.1711	33.5616	22.91	26.6255	26.0645	11.1799	19.0978	12.6387	14.3836	-0.42531	6.1822e-06
SmVG_002537:Smp_092990	6.16186	5.70797	-0.80605	3.58573	7.78812	4.94923	7.45229	9.02789	1.85391	7.24584	4.99975	-0.590102	9.21108	12.7767	8.6989	10.1911	10.1347	4.56331	7.21819	4.6504	5.6418	-0.424462	5.50829e-06
SmVG_002537:Smp_173050.1	6.16186	5.70797	-0.80605	3.58573	7.78812	4.94923	7.45229	9.02789	1.85391	7.24584	4.99975	-0.590102	9.21108	12.7767	8.6989	10.1911	10.1347	4.56331	7.21819	4.6504	5.6418	-0.424462	5.50829e-06
SmVG_002537:Smp_173050.2	6.16186	5.70797	-0.80605	3.58573	7.78812	4.94923	7.45229	9.02789	1.85391	7.24584	4.99975	-0.590102	9.21108	12.7767	8.6989	10.1911	10.1347	4.56331	7.21819	4.6504	5.6418	-0.424462	5.50829e-06
Smp_081260	8.24255	10.0385	-0.686057	4.09973	6.79394	5.56939	8.74122	9.09861	2.04225	12.4186	10.8995	-0.357218	11.2342	15.8702	10.7999	12.4558	12.494	5.38385	8.77695	5.59777	6.92857	-0.422259	8.59931e-06
Smp_125110	4.68754	5.88319	-0.767501	1.76881	3.10561	2.15919	4.48962	4.49958	0.913299	8.16077	7.48922	-0.369998	5.65512	7.68399	5.11655	6.63761	6.16414	2.86485	4.41025	2.71648	3.69099	-0.420706	4.12383e-05
Smp_169180	6.48197	7.21135	-0.565337	2.09392	4.5782	3.80264	5.3377	5.52411	1.08691	12.0404	10.3869	-0.381466	7.79037	12.5289	7.82358	9.99822	9.22439	3.84999	6.98542	4.11961	5.49144	-0.419695	0.000102658
Smp_166370	2.25282	2.78912	-0.656122	1.0758	1.79077	1.45804	2.28375	2.54406	0.565045	3.91482	3.03302	-0.515278	2.77837	4.60243	2.52479	3.50816	3.03898	1.37874	2.6166	1.31173	1.9313	-0.419003	0.0018263
Smp_170100	10.3165	12.4891	-0.569219	4.77024	7.39257	7.17076	8.74567	10.6715	2.36895	26.2121	22.6029	-0.385393	19.2079	29.1802	19.1601	22.7972	23.1869	9.3126	16.2512	9.92903	12.3498	-0.417968	1.05855e-05
SmVG_035798	7.87951	9.10837	-0.616672	2.24236	4.65456	4.00138	5.9786	6.71524	1.46897	10.7106	12.1047	-0.412641	6.95022	8.99425	6.40536	11.0754	9.62104	4.08401	6.06097	3.86238	6.18256	-0.417822	8.326e-05
Smp_198380	18.3927	20.5114	-0.393345	9.15217	11.6162	9.57056	12.3668	12.4911	4.53474	25.1136	24.8556	-0.404418	19.8954	23.8997	16.3538	18.84	20.2957	9.40789	12.9432	8.40541	11.5017	-0.417501	5.24796e-05
Smp_153870	8.08368	10.4085	-0.699574	2.871	6.35034	5.39864	7.43326	8.38565	1.43025	12.7458	10.1766	-0.437697	9.67607	14.379	9.26383	11.1688	11.2951	4.65768	7.89596	4.83194	6.13745	-0.416917	3.00731e-05
Smp_166050	37.1097	40.0528	-0.477099	14.4412	26.227	19.7809	29.5807	29.535	7.0184	40.1771	31.1449	-0.379628	24.7806	42.0204	27.6173	31.889	27.9303	11.7104	22.5466	13.9986	15.8992	-0.416759	0.000213056
SmVG_023473:Smp_078410	11.6467	11.5204	-0.403915	9.52385	13.8058	13.3364	13.9075	17.6214	4.91098	16.8741	17.2605	-0.460546	22.3811	31.8671	24.8788	28.0708	27.2629	10.8824	17.6185	13.033	16.478	-0.416392	6.34503e-07
SmVG_023473:Smp_078420	11.6467	11.5204	-0.403915	9.52385	13.8058	13.3364	13.9075	17.6214	4.91098	16.8741	17.2605	-0.460546	22.3811	31.8671	24.8788	28.0708	27.2629	10.8824	17.6185	13.033	16.478	-0.416392	6.34503e-07
SmVG_023473:Smp_164470	11.6467	11.5204	-0.403915	9.52385	13.8058	13.3364	13.9075	17.6214	4.91098	16.8741	17.2605	-0.460546	22.3811	31.8671	24.8788	28.0708	27.2629	10.8824	17.6185	13.033	16.478	-0.416392	6.34503e-07
Smp_127710	12.3193	16.82	-0.645969	7.8295	8.69889	11.2737	15.3775	15.9386	4.45829	35.3315	25.593	-0.278563	29.389	38.8473	21.4677	30.8274	27.1816	15.4815	22.8433	12.3549	15.7606	-0.415949	0.00170082
Smp_158810	130.104	133.087	-0.428328	55.7927	92.1452	75.2265	85.5586	98.4587	28.9421	81.7787	79.0603	-0.504327	66.5737	82.3892	63.3632	69.1383	76.4098	33.0987	46.8057	33.5289	42.9218	-0.415804	4.68036e-05
Smp_017750	36.4096	36.2341	-0.430227	11.9809	24.8301	18.516	24.5503	29.2184	6.38072	37.6096	34.8134	-0.330974	23.8905	39.1262	25.4677	33.0871	30.1739	12.1522	22.5918	14.1165	18.7445	-0.414919	5.40446e-05
Smp_079770	556.232	704.541	-0.570842	285.258	439.869	489.624	624.172	672.28	146.507	416.746	457.515	-0.330308	365.562	479.835	435.609	426.571	449.081	179.192	266.177	229.73	257.019	-0.414289	7.43643e-05
Smp_072660	16.5074	21.5132	-0.887309	4.11077	10.2654	7.57729	14.6444	20.4435	2.38087	9.36934	7.49707	-0.306777	5.8243	8.23617	4.22707	6.488	6.48019	3.06188	4.96863	2.76425	3.51211	-0.410713	0.00111791
Smp_153340	45.9617	48.3566	-0.331982	22.1971	38.5489	28.9116	32.2876	39.4701	11.2288	46.2518	39.2533	-0.370356	42.857	57.4557	39.9427	46.9839	43.8478	20.3371	31.4972	20.5132	24.7731	-0.409779	5.13096e-06
Smp_060940	28.7881	35.5724	-0.449603	12.105	23.4374	18.3373	21.9823	24.3576	6.17823	28.9346	22.0774	-0.408446	27.399	35.0153	23.7682	25.2626	28.7342	13.4649	19.5484	12.6532	13.6238	-0.409361	0.000815036
Smp_173140	15.4581	15.6201	-0.620253	4.93085	9.83785	5.87306	9.89229	11.4276	2.57863	15.1212	10.8756	-0.408183	8.2996	14.2654	6.89687	9.08921	9.14657	4.15633	8.07677	3.75457	5.41926	-0.409184	0.0072351
SmVG_032595	1.05306	0.648505	-0.579377	0.543852	0.95416	0.96044	1.18705	1.40772	0.32939	1.99098	2.50371	-0.494311	1.8467	2.58259	2.1488	4.16392	2.65359	1.24389	1.82083	1.48992	2.0354	-0.408918	0.00387631
Smp_139810	14.2042	23.5973	-0.456698	7.31751	9.45542	7.37506	13.304	13.1717	4.00284	38.687	29.8139	-0.323928	24.2823	39.6358	21.496	27.283	28.8645	12.5985	22.9591	12.0606	16.1005	-0.407642	0.00262504
Smp_154970	19.8898	21.0838	-0.496567	8.02256	12.988	7.17285	10.917	13.1787	4.20413	51.3693	67.8474	-0.356941	43.1338	49.523	49.9358	47.9031	48.5195	21.5655	28.2972	26.7284	33.2741	-0.406847	0.000956028
Smp_169980	7.72468	8.19864	-0.533185	2.44786	5.38239	4.27017	5.74239	5.78435	1.26831	8.44617	6.62452	-0.396834	5.84428	8.78527	6.11354	6.72577	6.89441	2.90289	4.92441	3.26115	3.58519	-0.406746	4.86477e-05
SmVG_023738:Smp_019610	4.94219	5.58736	-0.47988	3.97002	5.50737	4.93085	5.68482	6.15993	1.94844	15.5109	15.467	-0.396511	17.4809	23.2176	19.2125	20.057	20.0348	8.2417	12.6893	9.8975	11.656	-0.404596	6.7266e-06
SmVG_023738:Smp_173550	4.94219	5.58736	-0.47988	3.97002	5.50737	4.93085	5.68482	6.15993	1.94844	15.5109	15.467	-0.396511	17.4809	23.2176	19.2125	20.057	20.0348	8.2417	12.6893	9.8975	11.656	-0.404596	6.7266e-06
Smp_159620	10.8541	12.8874	-0.560494	3.06921	5.47503	3.54987	7.14631	8.26497	1.69362	18.4405	15.6649	-0.315643	9.84293	13.8713	6.51332	11.5379	11.2996	5.42598	8.72717	4.698	6.51328	-0.404153	0.000631529
Smp_000020	10.3038	10.1794	-0.320644	5.43177	7.89794	7.11674	7.74507	8.897	2.68928	13.5521	11.9834	-0.331126	11.131	15.2757	8.99002	12.2237	11.1139	5.31142	8.44996	4.6852	6.95288	-0.403727	0.000315492
Smp_159000	2.72156	3.59552	-1.16632	1.32373	3.07492	2.31631	5.10099	5.81006	0.673282	3.26651	2.60235	-0.541782	4.23841	5.97771	3.2228	4.06431	4.49546	2.08634	3.37097	1.72079	2.57396	-0.40321	0.00558465
Smp_131890	10.3409	13.5565	-0.919499	3.85242	7.18305	8.00893	12.9916	13.7946	2.01988	72.8238	65.2079	-0.33872	55.5406	81.497	48.8872	60.3994	61.1321	27.6093	45.8977	26.3241	37.5104	-0.401506	0.000293893
Smp_124640	10.0461	10.4512	-0.513066	3.78976	6.85306	5.35719	7.78889	9.13936	1.92638	6.41731	5.16839	-0.344499	4.05755	6.64196	4.50417	4.98264	5.01743	1.9648	3.66715	2.36157	2.72012	-0.401012	0.000530473
Smp_147250	16.1502	16.5227	-0.364353	6.4455	12.3946	12.6735	12.0143	12.7396	3.29695	17.0126	17.8121	-0.391194	13.4911	18.7166	15.5261	17.8291	17.6539	6.67227	10.4926	8.37146	10.3304	-0.40032	4.88288e-05
SmVG_031065:Smp_067390	20.5197	21.814	-0.409892	10.4707	16.3356	16.4545	17.7671	19.8841	5.15632	21.2994	23.5678	-0.312128	18.8561	26.6419	18.6923	22.74	19.8308	8.84015	14.3333	9.38771	13.7652	-0.399173	6.31442e-06
SmVG_031065:Smp_067400	20.5197	21.814	-0.409892	10.4707	16.3356	16.4545	17.7671	19.8841	5.15632	21.2994	23.5678	-0.312128	18.8561	26.6419	18.6923	22.74	19.8308	8.84015	14.3333	9.38771	13.7652	-0.399173	6.31442e-06
SmVG_031065:Smp_158680	20.5197	21.814	-0.409892	10.4707	16.3356	16.4545	17.7671	19.8841	5.15632	21.2994	23.5678	-0.312128	18.8561	26.6419	18.6923	22.74	19.8308	8.84015	14.3333	9.38771	13.7652	-0.399173	6.31442e-06
Smp_160080	10.6975	13.737	-0.937735	6.27446	9.3611	6.77123	10.7953	12.951	3.37029	17.3182	9.62698	-0.52567	12.6675	19.6817	10.7826	13.5911	12.7929	6.41034	11.3474	5.95219	6.85089	-0.398144	0.00434276
Smp_104310	9.31922	9.1563	-1.06474	7.81246	9.60533	7.90807	11.7313	12.4516	4.03742	14.6235	9.34752	-0.548063	12.0079	18.5921	12.6223	17.205	14.3403	6.11793	11.2079	7.36198	7.68002	-0.396172	0.00362469
Smp_155720	17.4598	25.7692	-0.551403	8.15301	10.4527	9.27589	15.5816	15.8161	4.449	28.0145	24.762	-0.415556	19.2368	24.6299	14.0978	19.9873	19.8182	9.8865	14.3115	8.00828	11.9596	-0.391376	0.000784382
SmVG_020055:Smp_082330	2.16694	3.41599	-0.830706	0.68814	0.963463	0.850495	2.01273	2.03864	0.425042	8.02611	7.49644	-0.269768	3.50251	4.74812	2.81897	4.87977	5.10897	2.37848	3.73811	2.32773	3.23655	-0.389319	0.000269277
SmVG_020055:Smp_127000	2.16694	3.41599	-0.830706	0.68814	0.963463	0.850495	2.01273	2.03864	0.425042	8.02611	7.49644	-0.269768	3.50251	4.74812	2.81897	4.87977	5.10897	2.37848	3.73811	2.32773	3.23655	-0.389319	0.000269277
SmVG_020055:Smp_181630	2.16694	3.41599	-0.830706	0.68814	0.963463	0.850495	2.01273	2.03864	0.425042	8.02611	7.49644	-0.269768	3.50251	4.74812	2.81897	4.87977	5.10897	2.37848	3.73811	2.32773	3.23655	-0.389319	0.000269277
Smp_150970	6.89128	7.58061	-0.679077	2.49708	4.85542	4.2647	6.30994	7.04317	1.31133	14.5911	13.9777	-0.305408	11.2353	14.5721	11.7045	13.8228	12.9125	5.85285	8.60282	6.49018	7.09274	-0.389088	1.36243e-05
Smp_031100	17.318	20.7827	-0.638714	12.6666	20.1971	18.1144	25.5459	26.6766	7.24541	40.6635	30.2591	-0.333192	28.4333	45.8603	26.8954	31.8082	31.5963	13.982	25.8169	14.3238	16.2182	-0.388668	0.00133336
Smp_047720	2.10205	3.43054	-0.668469	1.66725	2.97803	2.72842	3.79598	4.73889	0.854781	1.37105	1.25639	-0.535303	2.14168	2.6954	2.37997	2.67175	2.2474	1.06426	1.56551	1.30178	1.42521	-0.388016	0.00142639
Smp_211160	3.72198	3.60446	-0.50354	1.50671	2.7894	1.85519	2.62916	3.21083	0.722754	1.62027	0.941383	-0.487624	1.17449	1.80598	1.22723	1.48643	1.28364	0.564293	1.03934	0.636088	0.66159	-0.387848	0.0114112
SmVG_028697:Smp_136560	7.21244	8.54865	-0.696597	2.27546	4.61662	5.03371	6.78657	7.11787	1.16803	9.78689	11.5393	-0.338244	7.73103	9.53258	7.2632	9.45675	8.29593	3.8047	5.34313	3.86362	5.7259	-0.384763	3.1488e-05
SmVG_028697:Smp_136570	7.21244	8.54865	-0.696597	2.27546	4.61662	5.03371	6.78657	7.11787	1.16803	9.78689	11.5393	-0.338244	7.73103	9.53258	7.2632	9.45675	8.29593	3.8047	5.34313	3.86362	5.7259	-0.384763	3.1488e-05
Smp_175620	11.3755	15.0104	-0.327179	5.67247	8.07933	7.70492	9.4475	9.72815	2.92384	32.0244	30.048	-0.33748	26.4837	33.8862	26.143	29.3704	29.0322	13.1055	19.0993	14.072	15.8964	-0.384504	1.89414e-05
Smp_128360	34.5193	39.1682	-0.574115	20.7519	28.0584	24.601	35.462	41.8039	10.4503	23.1648	20.8706	-0.304784	18.6246	28.085	22.2001	23.9465	21.7448	9.05396	15.5595	11.8215	12.243	-0.383657	3.34114e-05
Smp_086420	53.03	64.3842	-0.534087	17.5362	28.1912	22.308	46.9992	51.0545	12.0607	110.747	107.097	-0.321089	61.9521	91.3065	74.4828	107.548	99.4482	41.0758	65.7661	51.7456	58.2577	-0.383143	5.25706e-05
SmVG_023330:Smp_141910	4.1065	6.30224	-0.776423	2.41354	3.24011	2.74423	5.01318	4.7124	1.23564	12.1432	9.04598	-0.312108	8.44101	14.1915	7.54283	9.61859	9.25179	4.14312	7.96343	4.04478	5.33398	-0.38126	0.00727795
SmVG_023330:Smp_141920	4.1065	6.30224	-0.776423	2.41354	3.24011	2.74423	5.01318	4.7124	1.23564	12.1432	9.04598	-0.312108	8.44101	14.1915	7.54283	9.61859	9.25179	4.14312	7.96343	4.04478	5.33398	-0.38126	0.00727795
Smp_133710	38.5041	43.1533	-0.531858	19.1061	33.6628	26.0301	34.914	44.1952	9.76445	23.5981	19.9168	-0.372908	17.8101	31.178	21.2061	22.7431	21.1789	8.73308	17.444	11.2699	13.0908	-0.38057	0.000674429
Smp_075810	10.8931	12.9804	-0.732097	3.53354	6.90802	4.25806	8.9027	9.60852	1.90011	22.7491	15.2957	-0.306182	11.6721	21.7067	10.8437	14.1709	15.3192	6.02527	12.7633	6.13422	7.99355	-0.37887	0.0117333
Smp_172220	29.5713	39.133	-0.565118	11.3222	17.8406	14.9445	24.0034	22.798	5.89944	43.0203	35.783	-0.351762	26.2925	39.6305	25.0041	31.6914	30.6762	13.0549	22.334	13.5611	17.2976	-0.375573	0.000108244
Smp_056390	43.3582	54.8994	-0.383976	22.541	29.6415	26.3352	32.2766	35.9683	11.2389	98.3834	108.374	-0.270627	81.0887	103.935	75.7551	79.731	91.8234	39.501	57.6053	39.8831	56.9599	-0.373977	0.000487065
SmVG_019809:Smp_095880	6.84555	7.79817	-0.335764	2.39992	3.83157	3.81446	4.22023	5.49463	1.29718	5.27489	5.11306	-0.332088	3.43089	4.49353	4.22886	4.38349	4.3143	1.74232	2.56027	2.35315	2.34291	-0.372973	0.00128976
SmVG_019809:Smp_174740	6.84555	7.79817	-0.335764	2.39992	3.83157	3.81446	4.22023	5.49463	1.29718	5.27489	5.11306	-0.332088	3.43089	4.49353	4.22886	4.38349	4.3143	1.74232	2.56027	2.35315	2.34291	-0.372973	0.00128976
Smp_144430	48.4949	61.5588	-0.603376	18.5032	38.1733	24.8009	36.7936	48.86	9.22259	20.44	14.8731	-0.469467	17.6412	25.5888	16.1682	18.8773	16.928	8.55232	13.9759	8.40355	10.3654	-0.372713	0.000644598
Smp_142550	10.1184	10.7049	-0.527174	3.34739	6.87541	6.3812	7.76254	9.38914	1.64405	6.35933	8.00478	-0.366308	5.08484	6.7432	6.20293	7.06779	5.99754	2.4213	3.70048	3.17175	3.91307	-0.372005	0.000435726
Smp_136510	6.69541	8.15401	-0.676217	3.19459	5.64473	4.2524	6.66508	8.55978	1.84122	9.49243	7.15417	-0.428924	7.55618	11.8388	5.96676	8.7587	8.59388	4.30867	7.28213	3.53441	5.26768	-0.371412	0.0154841
Smp_149040	21.4469	21.3878	-0.66355	7.87374	15.8156	14.216	18.9206	22.0433	3.89864	30.1015	23.1734	-0.294719	20.951	33.6301	20.8699	24.3049	23.2149	10.0723	18.5159	10.7796	12.8055	-0.371199	0.00101994
Smp_149160	5.95943	6.79027	-0.560275	3.31855	5.15355	3.40377	5.26659	5.6097	1.63459	11.7317	8.36364	-0.302979	9.44937	15.0258	8.33258	10.0101	9.80299	4.51733	8.23688	4.34672	5.06774	-0.370808	0.0031
Smp_127830	17.6278	24.2767	-0.426956	7.31874	11.1002	8.33924	13.3674	13.5027	3.84163	32.9635	28.8044	-0.281733	22.7487	31.3916	17.8721	22.4919	23.2124	11.2943	17.5872	9.62549	13.5896	-0.367049	0.00222354
Smp_160710	44.138	64.2555	-0.355117	19.5593	32.6079	26.983	33.5135	47.6969	10.172	18.7284	15.104	-0.350496	16.6753	20.6429	12.4158	15.9728	15.6777	8.34681	11.7373	6.75794	8.94796	-0.366995	0.00661789
Smp_133550	1.04353	1.54158	-0.92885	0.437708	0.611486	0.527646	1.00837	1.03345	0.242556	6.97961	5.95835	-0.333417	4.55354	6.80931	4.39084	5.93279	5.4536	2.38757	4.04245	2.56882	3.18231	-0.365606	0.00086789
Smp_031710	52.3531	47.7088	-0.371984	27.3181	46.1227	39.1088	37.2799	46.1744	13.2581	39.3155	41.0655	-0.394982	38.2921	49.858	35.5433	40.1736	41.5395	18.1475	27.2188	18.2217	25.928	-0.363752	8.53001e-05
SmVG_016648:Smp_056560	1.54812	1.32505	-0.606203	0.794994	1.2694	1.18453	1.52057	1.94745	0.439351	5.94831	4.07344	-0.320407	6.07162	8.64606	5.38537	7.27712	6.49651	3.1416	5.05009	3.00679	3.6887	-0.363435	0.000574631
SmVG_016648:Smp_152500	1.54812	1.32505	-0.606203	0.794994	1.2694	1.18453	1.52057	1.94745	0.439351	5.94831	4.07344	-0.320407	6.07162	8.64606	5.38537	7.27712	6.49651	3.1416	5.05009	3.00679	3.6887	-0.363435	0.000574631
SmVG_032453:Smp_071920	5.05843	5.68503	-0.552583	1.30593	3.24815	2.64032	4.01263	4.10276	0.668586	11.2463	9.43851	-0.285792	7.81097	11.3222	6.73852	9.00085	8.83306	3.78692	6.29736	3.49824	4.82548	-0.358523	0.00159229
SmVG_032453:Smp_177860	5.05843	5.68503	-0.552583	1.30593	3.24815	2.64032	4.01263	4.10276	0.668586	11.2463	9.43851	-0.285792	7.81097	11.3222	6.73852	9.00085	8.83306	3.78692	6.29736	3.49824	4.82548	-0.358523	0.00159229
SmVG_032453:Smp_177870	5.05843	5.68503	-0.552583	1.30593	3.24815	2.64032	4.01263	4.10276	0.668586	11.2463	9.43851	-0.285792	7.81097	11.3222	6.73852	9.00085	8.83306	3.78692	6.29736	3.49824	4.82548	-0.358523	0.00159229
SmVG_032453:Smp_199010	5.05843	5.68503	-0.552583	1.30593	3.24815	2.64032	4.01263	4.10276	0.668586	11.2463	9.43851	-0.285792	7.81097	11.3222	6.73852	9.00085	8.83306	3.78692	6.29736	3.49824	4.82548	-0.358523	0.00159229
Smp_129130	10.1595	10.0722	-0.452738	4.31773	7.86918	6.71039	8.12743	9.62789	2.16572	14.5609	12.809	-0.312905	12.1776	17.2143	13.2847	14.0231	14.1927	5.89952	9.61084	6.97476	7.66791	-0.358476	0.000267569
Smp_154100	4.32063	5.08487	-0.397931	1.35443	3.04711	2.02483	2.59131	3.51561	0.707617	1.52729	1.37145	-0.35909	0.905683	1.57923	1.17353	1.42283	1.22727	0.462515	0.940569	0.646308	0.747926	-0.358381	0.0202879
Smp_210370	105.283	124.348	-0.653295	39.1596	76.0759	59.6499	85.2305	105.286	20.2955	85.8746	64.4718	-0.414644	59.6617	90.8817	63.6261	66.2411	68.2903	29.6099	51.1713	34.7345	38.5307	-0.358155	0.000340907
Smp_132240	8.47	11.0635	-0.631806	2.4846	5.39602	4.82183	7.43449	6.93559	1.30247	20.8238	18.3958	-0.293362	13.8354	20.7167	13.36	16.1317	15.7806	6.83155	11.7323	7.10439	9.24485	-0.354446	0.000180303
Smp_161370	5.19852	5.95572	-0.438851	1.62634	3.47765	2.97855	3.51578	4.03205	0.816134	8.21518	8.05822	-0.335289	5.93324	8.34706	5.37158	7.34971	6.66243	2.88516	4.68999	2.83213	4.17919	-0.354432	0.000763042
Smp_104670	117.556	140.125	-0.354065	61.343	82.3084	65.7618	83.481	88.0097	31.9298	209.29	164.502	-0.35618	147.591	211.003	140.468	162.243	155.257	74.7497	120.278	76.7177	89.4265	-0.35138	0.000296822
Smp_049010	32.4069	45.2385	-0.707465	12.3453	19.194	17.1475	28.4728	30.3881	6.30619	73.9959	70.6625	-0.323082	51.3514	65.8722	44.017	55.1884	51.8415	25.2828	36.8562	23.5667	31.9101	-0.350873	0.000154881
Smp_013060	11.0074	14.7317	-0.394074	5.73457	7.19959	5.2279	8.29525	8.38384	2.8373	30.3565	22.1095	-0.333855	21.0159	30.0635	16.6439	21.8014	20.0675	10.0495	16.6119	8.57929	11.2621	-0.349249	0.00500886
Smp_176800	8.92332	10.0021	-0.801321	2.94415	4.90043	3.82659	7.0909	8.14588	1.55231	13.1297	10.5662	-0.290034	7.22309	11.1664	6.8462	7.76614	8.38415	3.61303	6.35021	3.71246	4.67636	-0.346921	0.00230268
Smp_041190	25.616	30.9921	-0.565812	13.5659	21.9101	17.2997	24.8888	28.7677	7.15022	33.9049	26.9721	-0.330362	26.2028	41.3004	27.3209	31.2475	28.7921	12.9075	22.9793	14.4668	16.6517	-0.34644	0.000429492
Smp_151670	6.20056	7.97686	-0.407159	2.51174	4.18152	3.51712	4.20732	4.85579	1.24717	11.9866	10.2175	-0.337546	7.58331	11.7922	7.4925	8.71325	7.63825	3.74981	6.55401	3.90904	5.17948	-0.345565	0.00140315
SmVG_007064:Smp_176640	3.54045	4.07582	-0.408947	2.04046	2.96685	2.04571	2.73698	2.97604	1.0163	6.80353	4.62817	-0.3525	5.71636	7.83022	4.2627	5.22463	5.18981	2.74866	4.35591	2.22262	2.7439	-0.345509	0.0115789
SmVG_007064:Smp_176650	3.54045	4.07582	-0.408947	2.04046	2.96685	2.04571	2.73698	2.97604	1.0163	6.80353	4.62817	-0.3525	5.71636	7.83022	4.2627	5.22463	5.18981	2.74866	4.35591	2.22262	2.7439	-0.345509	0.0115789
Smp_154110	3.18346	3.62336	-0.342768	2.12344	3.62432	2.77402	3.28928	3.87577	1.11343	4.43353	3.6109	-0.300302	5.39236	7.05287	4.32167	5.10912	5.34864	2.74429	4.04864	2.31723	3.02902	-0.345083	0.00315246
Smp_038240	16.9398	20.6819	-0.57634	7.28598	13.7554	11.3765	15.0809	19.3526	3.76433	9.54693	7.43359	-0.325858	7.37021	10.8134	6.78826	7.47688	7.67335	3.63109	6.01289	3.6518	4.21419	-0.344158	0.0124358
Smp_093430	15.0373	17.4694	-0.709811	5.91798	11.5287	7.94318	13.26	15.5096	3.10268	22.4819	17.1861	-0.33012	15.9866	24.1751	16.3803	17.9232	17.1499	7.98107	13.6837	8.866	9.4898	-0.341865	0.00187098
Smp_022990	34.141	34.7355	-0.345233	12.312	20.2105	13.122	17.8942	20.6828	6.54975	44.6063	37.3533	-0.315901	27.024	39.3732	25.8184	28.5884	31.6782	13.7255	22.7019	14.3666	17.5285	-0.339472	0.000679622
Smp_089400	43.6989	46.1243	-0.39542	25.1205	39.6206	31.1893	37.1812	41.6136	12.9911	57.5469	45.1414	-0.387388	51.7367	71.6709	48.2232	51.69	55.7362	26.1054	40.8765	26.3998	31.604	-0.339386	0.00076402
Smp_041450	82.0476	84.9525	-0.429329	44.3139	64.9665	53.4685	66.1795	73.3586	22.6172	77.2145	53.1288	-0.387316	51.4267	86.114	57.9261	57.5056	61.3326	25.2128	47.7417	31.2023	30.9017	-0.339039	0.00449887
Smp_130110	5.68797	6.1997	-0.855361	4.22461	7.71615	6.83309	10.5781	11.1671	2.31147	7.78566	5.83878	-0.475679	9.31223	12.738	9.64201	13.0589	10.2656	5.08789	7.74629	5.71135	7.23533	-0.337434	8.96533e-05
SmVG_014402:Smp_167680.1	12.2624	14.6909	-0.605219	4.61321	8.01712	6.92356	10.952	10.9507	2.3405	21.4683	20.7097	-0.324395	15.0433	20.7398	14.2883	17.664	16.4889	7.31124	11.4573	7.52981	10.137	-0.336383	0.000749552
SmVG_014402:Smp_167680.2	12.2624	14.6909	-0.605219	4.61321	8.01712	6.92356	10.952	10.9507	2.3405	21.4683	20.7097	-0.324395	15.0433	20.7398	14.2883	17.664	16.4889	7.31124	11.4573	7.52981	10.137	-0.336383	0.000749552
SmVG_014402:Smp_167690	12.2624	14.6909	-0.605219	4.61321	8.01712	6.92356	10.952	10.9507	2.3405	21.4683	20.7097	-0.324395	15.0433	20.7398	14.2883	17.664	16.4889	7.31124	11.4573	7.52981	10.137	-0.336383	0.000749552
Smp_130040	5.04851	5.55326	-0.35395	2.01337	3.27514	2.89524	3.26693	3.75175	1.03879	8.04373	8.34098	-0.292778	5.97821	8.12728	5.93609	6.70339	6.41197	2.9308	4.54487	3.13352	4.18148	-0.335613	0.00024805
Smp_175430	25.629	25.8444	-0.409836	9.72568	17.1928	13.4795	17.7195	18.9736	4.74925	20.8515	17.1574	-0.281997	12.6087	20.2757	13.282	14.5456	14.1565	5.94928	11.0186	6.81598	8.07451	-0.335429	0.00080079
Smp_151720	9.00504	8.29446	-0.393003	4.64843	8.34914	6.63458	8.78689	8.62286	2.37744	13.095	12.7374	-0.340926	11.8327	17.8986	11.1614	14.1074	13.1839	5.75353	10.0261	5.78427	8.41627	-0.333901	0.00063825
Smp_010690	15.8733	22.8319	-0.385381	6.4248	9.94257	8.75403	10.9462	11.6406	3.25117	39.2501	26.9979	-0.355574	23.2745	36.2249	18.2137	24.449	23.2125	11.4508	20.5026	9.46206	13.1161	-0.332529	0.0177688
Smp_150080	13.7254	15.8492	-0.449891	5.99752	9.08061	6.90533	10.5633	11.0023	3.17781	21.8685	19.0787	-0.315749	15.3338	21.429	13.5085	18.4186	15.3978	7.7773	12.4829	7.5234	9.67771	-0.328186	0.00243722
SmVG_024284:Smp_136520	7.06348	7.53102	-0.453914	3.56394	5.65062	4.08528	5.32634	6.1342	1.72817	10.8317	8.79402	-0.381095	8.61384	13.317	8.10152	9.79464	8.64924	4.18046	7.25096	4.09568	5.66629	-0.327139	0.00228715
SmVG_024284:Smp_136530	7.06348	7.53102	-0.453914	3.56394	5.65062	4.08528	5.32634	6.1342	1.72817	10.8317	8.79402	-0.381095	8.61384	13.317	8.10152	9.79464	8.64924	4.18046	7.25096	4.09568	5.66629	-0.327139	0.00228715
Smp_017010	82.6548	86.0731	-0.415248	28.9668	56.2785	51.8426	59.7837	64.3891	14.5786	82.7369	71.9941	-0.307368	49.634	81.3984	50.1894	58.0578	53.4969	24.1547	45.3927	26.3829	36.1621	-0.325321	0.00520178
Smp_196880	11.2236	13.9435	-0.582222	3.98371	7.71551	5.91183	9.42352	10.6849	2.13451	12.5299	12.9651	-0.282397	8.18358	12.2442	9.23924	11.2279	9.07665	4.1522	6.95176	5.00237	6.7324	-0.324715	0.00184218
Smp_021100	6.8788	6.84114	-0.426431	2.32097	4.73632	3.6333	4.49369	4.98894	1.15694	8.47461	6.58725	-0.295611	5.72672	8.85539	5.09699	6.20751	5.99109	2.78934	4.97318	2.72443	3.52037	-0.321903	0.00341565
Smp_055870	151.536	209.373	-0.449432	99.178	130.833	102.184	148.153	149.548	56.5003	283.198	195.904	-0.317985	233.215	347.804	193.652	244.642	240.393	127.597	209.882	117.007	135.001	-0.321662	0.0164876
Smp_091470	29.4354	27.4083	-0.380724	13.3973	25.1388	19.8754	23.6165	26.4212	6.8762	24.1481	21.8693	-0.293658	21.6981	32.0176	21.8589	23.1378	23.5648	10.8609	18.0705	11.7709	14.1852	-0.317305	0.00110488
Smp_135280	38.0062	46.165	-0.968872	10.5936	22.8143	16.8558	31.0546	37.585	5.46215	34.2992	30.5259	-0.287956	22.2208	31.086	19.0918	22.035	22.2581	10.8205	17.283	10.0756	14.17	-0.314999	0.00560858
Smp_010930	32.5085	38.5344	-0.608763	13.9474	23.7114	15.2405	25.0213	29.105	6.98325	36.0287	27.6803	-0.299145	22.6455	37.9671	24.0746	25.3034	26.4359	10.9981	21.0627	12.6244	15.151	-0.311431	0.00340824
SmVG_022104:Smp_010900	22.2868	22.9659	-0.380694	9.32651	15.4582	11.9254	15.5636	18.6476	4.87194	25.9031	22.2282	-0.25904	19.8602	28.5269	18.0437	20.5251	20.4943	9.93236	16.2121	9.72139	12.538	-0.311052	0.00258432
SmVG_022104:Smp_211290	22.2868	22.9659	-0.380694	9.32651	15.4582	11.9254	15.5636	18.6476	4.87194	25.9031	22.2282	-0.25904	19.8602	28.5269	18.0437	20.5251	20.4943	9.93236	16.2121	9.72139	12.538	-0.311052	0.00258432
SmVG_022104:Smp_211300	22.2868	22.9659	-0.380694	9.32651	15.4582	11.9254	15.5636	18.6476	4.87194	25.9031	22.2282	-0.25904	19.8602	28.5269	18.0437	20.5251	20.4943	9.93236	16.2121	9.72139	12.538	-0.311052	0.00258432
Smp_149960	21.273	26.6159	-0.318174	8.44826	13.1684	8.71695	12.9062	12.8028	4.32308	40.6875	27.6765	-0.252631	23.8567	38.4765	22.7811	24.5144	24.8135	11.6713	21.4458	12.1418	13.1443	-0.304513	0.0157898
Smp_134410	5.82083	5.47227	-0.451811	1.81933	3.34564	3.03117	3.41904	3.86221	0.950409	25.6484	29.1498	-0.264855	17.5987	22.811	18.2006	24.3872	16.6924	8.83801	12.9898	9.83938	13.6204	-0.304106	0.00775806
Smp_199630	4.40039	4.85882	-0.565478	1.97218	3.24824	2.35534	3.28379	4.32356	0.93778	3.1361	2.3833	-0.405434	2.67288	3.51143	2.56869	2.69566	2.79337	1.34178	1.98128	1.43037	1.42036	-0.298547	0.0254352
SmVG_028692:Smp_026700	12.353	14.7117	-0.652969	6.91049	10.8602	7.04373	13.2906	14.1315	3.75678	25.0052	19.4719	-0.279168	21.8475	32.9713	19.3728	23.1648	23.0487	11.2907	19.2992	10.8584	13.974	-0.29665	0.00686646
SmVG_028692:Smp_136580	12.353	14.7117	-0.652969	6.91049	10.8602	7.04373	13.2906	14.1315	3.75678	25.0052	19.4719	-0.279168	21.8475	32.9713	19.3728	23.1648	23.0487	11.2907	19.2992	10.8584	13.974	-0.29665	0.00686646
Smp_151120	12.2203	11.8763	-0.951206	4.19326	9.45419	5.71104	10.4027	15.4956	2.11417	7.82976	6.25892	-0.301783	5.40425	8.10226	5.02129	6.02928	6.47353	2.79301	4.70027	2.82699	3.63106	-0.29241	0.0131432
Smp_079400	14.7415	17.7931	-0.590715	4.72236	7.9976	5.98557	9.51014	10.7743	2.64732	26.5367	19.6225	-0.28012	15.2002	22.245	12.0682	15.3276	15.8922	8.06224	13.2192	6.99756	8.86509	-0.291151	0.020908
Smp_165020	12.5278	14.1366	-0.620713	7.80771	13.5653	9.91039	13.5153	15.1585	4.0808	13.6559	9.75918	-0.42973	12.7824	20.2187	13.1447	15.0658	14.6156	6.80972	11.8983	7.50354	8.37433	-0.289569	0.00379209
SmVG_022322:Smp_057410	10.9374	20.9182	-1.08535	7.66339	10.0301	10.8264	17.4777	21.16	4.00105	34.1543	29.9794	-0.312109	35.8415	49.5685	33.0622	36.7654	39.8879	17.9414	28.3629	17.838	23.5908	-0.285358	0.00314585
SmVG_022322:Smp_152960	10.9374	20.9182	-1.08535	7.66339	10.0301	10.8264	17.4777	21.16	4.00105	34.1543	29.9794	-0.312109	35.8415	49.5685	33.0622	36.7654	39.8879	17.9414	28.3629	17.838	23.5908	-0.285358	0.00314585
SmVG_022322:Smp_152970	10.9374	20.9182	-1.08535	7.66339	10.0301	10.8264	17.4777	21.16	4.00105	34.1543	29.9794	-0.312109	35.8415	49.5685	33.0622	36.7654	39.8879	17.9414	28.3629	17.838	23.5908	-0.285358	0.00314585
SmVG_023340:Smp_006230	7.01191	10.1875	-0.612716	4.3757	8.05682	7.61326	9.23387	10.0103	2.10091	16.5029	13.1972	-0.353455	16.2718	27.6292	18.4747	18.6062	18.4575	7.64651	15.0411	9.48758	10.8647	-0.283582	0.00612784
SmVG_023340:Smp_006240	7.01191	10.1875	-0.612716	4.3757	8.05682	7.61326	9.23387	10.0103	2.10091	16.5029	13.1972	-0.353455	16.2718	27.6292	18.4747	18.6062	18.4575	7.64651	15.0411	9.48758	10.8647	-0.283582	0.00612784
Smp_038080	51.9525	52.4935	-0.514345	24.5019	42.1598	33.7996	40.9562	44.0528	12.0226	42.4935	31.8981	-0.353396	30.2545	50.53	31.4974	31.8475	31.7523	14.2532	27.1982	16.0768	19.5721	-0.278267	0.0103762
Smp_051500	7.96807	7.81679	-1.58803	3.3393	5.75815	3.79193	14.8907	14.8579	2.60414	14.521	9.32639	-0.441911	6.64199	12.0647	9.38758	14.2661	13.0974	6.46053	10.0803	7.77631	8.06329	-0.276296	0.0130182
Smp_142650	64.7822	71.5897	-0.33421	28.2464	53.8508	40.7116	42.8838	57.9322	14.7147	33.2833	29.1787	-0.248835	28.4731	38.8075	24.906	27.5015	27.0127	14.184	21.9615	13.4647	17.3039	-0.275644	0.00821597
Smp_030860	18.3273	15.3723	-0.425013	7.78807	12.6835	9.91193	12.8275	14.5555	4.14903	19.5718	15.0109	-0.260083	13.402	20.5025	14.5098	14.8303	14.0362	6.82513	11.7562	8.03709	8.20729	-0.273775	0.00856931
Smp_168200	28.5599	34.3154	-0.319857	11.6897	21.7505	15.4822	18.3286	23.7136	6.00178	36.1227	28.0596	-0.263794	25.8881	39.6204	24.3018	26.0487	25.3071	12.7185	22.1873	12.8528	16.0709	-0.271634	0.0164421
Smp_174450	71.9765	97.2369	-0.588702	31.6803	39.922	37.6451	50.6889	58.2575	15.8073	106.672	85.5317	-0.279626	67.6469	89.7748	61.4042	63.5896	60.3708	33.543	50.4391	32.2371	39.2245	-0.267922	0.0087769
Smp_157220	8.10082	8.20198	-0.590576	2.63957	5.6153	4.52949	5.67867	7.19514	1.34039	8.35602	7.35519	-0.27179	5.62881	8.47304	5.99894	6.28238	5.93959	2.7509	4.73897	3.17661	3.96692	-0.250064	0.00953878
Smp_124460	36.141	34.9161	-0.446886	15.552	26.9992	21.2773	24.6885	30.928	7.82515	19.179	16.0829	-0.332063	17.6085	21.8415	16.8711	16.1628	15.7357	8.48521	12.0801	8.90378	10.116	-0.246558	0.00869833
Smp_131400	39.3074	49.3065	-0.543736	29.8841	45.416	36.2992	47.4619	53.2759	15.6807	45.0933	36.6921	-0.29355	55.7408	75.753	58.2912	52.5741	54.9578	27.8781	42.7863	31.7248	34.4037	-0.228279	0.0256791
Smp_071970	22.3945	32.5825	-0.544206	13.4043	21.2237	18.1897	23.639	25.9051	7.12084	45.7369	35.4778	-0.308272	42.601	61.9568	39.6353	43.0343	43.816	20.9976	34.7632	21.2302	25.7772	-0.22634	0.0258067
