# Supplementary material for: Pharmacological inhibition of lysine-specific demethylase 1 (LSD1) induces global transcriptional deregulation and ultrastructural alterations that impair viability in Schistosoma mansoni
Source: PLoS Negl Trop Dis. 2020 Jul 1;14(7):e0008332. doi: 10.1371/journal.pntd.0008332 (PMC7329083; doi:10.1371/journal.pntd.0008332)
Supplement: S8 Table — (XLSX) [file pntd.0008332.s016.xlsx]

## Sheet: Common_Up_Male_Female
List of commonly upregulated genes_Female_Male
geneID	female: fpkm-treated_1-cuffquant	female: fpkm-treated_3-cuffquant	female: log2(fold_change)-cuffdiff	female: tpm-treated1-kallisto	female: tpm-treated2-kallisto	female: tpm-treated3-kallisto	female: TPM-control3-sailfish	female: TPM-control4-sailfish	female: TPM-treated1-sailfish	male: fpkm-treated_1-cuffquant	male: fpkm-treated_3-cuffquant	male: log2(fold_change)-cuffdiff	male: tpm-treated1-kallisto	male: tpm-treated2-kallisto	male: tpm-treated3-kallisto	male: TPM-control3-sailfish	male: TPM-control4-sailfish	male: TPM-treated1-sailfish	TPM-treated2-sailfish	TPM-treated3-sailfish	TPM-treated4-sailfish	log2FC-edgeR	p-value-edgeR
Smp_025390	29.6611	28.5104	5.75629	28.5817	27.5918	14.8943	0.239156	0.341853	15.2428	12.4451	13.4179	4.64275	16.5666	16.6594	15.4624	0.684203	0.367759	8.48335	9.71471	8.70243	9.55163	4.61348	1.11675e-77
SmVG_008649:Smp_047660	887.19	1332.29	1.73686	820.676	899.305	1189.86	297.697	234.849	428.378	1644.48	1806.2	4.20809	3484.88	4254.92	2650.48	80.949	70.0345	1741.25	2406.72	1448.66	1324.59	4.40945	8.29257e-42
SmVG_008649:Smp_047680	887.19	1332.29	1.73686	820.676	899.305	1189.86	297.697	234.849	428.378	1644.48	1806.2	4.20809	3484.88	4254.92	2650.48	80.949	70.0345	1741.25	2406.72	1448.66	1324.59	4.40945	8.29257e-42
Smp_159810	33.3627	9.06056	4.14662	71.9593	71.442	22.5007	2.27029	3.86314	38.3936	6.64867	8.36088	4.64911	28.1183	27.8343	13.9529	0.979343	1.18037	14.561	16.4066	7.87878	13.2897	3.86426	2.48378e-56
SmVG_007844	6.3794	7.96899	1.85186	6.59083	6.77992	11.0148	2.19428	1.70817	2.95351	7.22521	3.33084	3.73022	6.16321	10.6484	5.83622	0.613446	0.594789	2.81068	5.83635	2.7926	2.33615	3.63426	1.42412e-18
SmVG_022120	6.47446	5.6886	2.26658	2.23764	3.85637	3.31477	0.821045	0.667764	1.24956	4.3275	7.43813	3.6175	7.14386	4.36219	6.9874	0.822425	0	3.9248	2.6757	4.0359	4.65268	3.40412	5.81633e-13
Smp_176110	16.2317	21.0104	1.96253	8.2528	10.3652	3.36698	2.23409	2.32991	4.41759	216.013	114.339	3.487	98.2819	216.331	80.7409	7.94709	8.68981	50.0397	124.035	44.9332	57.1682	3.37198	6.55905e-41
Smp_128550	9.32698	5.70325	5.12674	4.40702	8.95331	6.09671	0.061934	0.33462	2.17795	4.54333	6.81426	3.17252	4.62714	5.8585	7.41715	0.815583	0.494498	2.31853	3.92193	4.44709	5.34593	3.3706	6.64566e-24
Smp_134870	44.2556	56.2932	4.00706	19.1012	25.7991	11.164	1.60529	1.33385	10.1334	46.7108	39.7641	3.20818	25.8586	40.9008	36.2609	3.20831	2.73525	13.2537	23.601	19.9787	18.4226	3.14499	1.68133e-135
Smp_133830	23.7082	25.5272	2.15651	11.1966	12.5203	8.75363	2.48672	2.34014	6.1204	287.645	233.313	3.0823	163.446	238.28	134.922	16.5968	18.3815	84.0553	138.797	75.8126	104.743	3.03097	3.58302e-123
SmVG_007783:Smp_147730	281.498	245.387	2.13284	479.953	387.444	284.227	80.5116	79.0175	273.91	581.782	560.969	3.37253	704.198	928.817	831.418	88.1633	79.7682	397.563	590.928	512.042	515.183	3.02245	1.38114e-129
SmVG_007783:Smp_172960	281.498	245.387	2.13284	479.953	387.444	284.227	80.5116	79.0175	273.91	581.782	560.969	3.37253	704.198	928.817	831.418	88.1633	79.7682	397.563	590.928	512.042	515.183	3.02245	1.38114e-129
Smp_172460	18.1902	29.393	2.56692	9.32768	11.6031	5.05994	1.97515	1.69363	5.52125	34.2953	22.9159	2.97978	21.3655	33.7697	18.3838	2.32355	1.99134	11.7276	20.5967	10.543	13.3356	3.00761	1.90279e-70
Smp_047650	764.133	998.002	1.06877	337.395	495.516	429.162	226.508	178.737	190.809	1649.17	1008.35	2.81916	1178.43	1678.92	930.453	115.325	112.481	614.7	998.312	527.932	496.542	2.8284	6.68515e-43
SmVG_031469	1.70776	2.45034	1.88823	26.544	26.8856	17.0943	12.4033	14.2806	28.1584	3.04418	2.24636	1.91205	36.8641	39.8561	38.7061	6.97387	5.92706	36.6185	42.3235	38.3301	39.4961	2.76642	6.12269e-35
Smp_022450	5.95131	5.57136	1.55942	8.87389	11.1342	6.40467	3.10445	3.68834	4.47773	24.9838	28.6138	2.94098	73.1322	80.0979	55.065	6.83161	7.35213	35.0719	43.9604	28.7208	34.3589	2.76427	3.19926e-85
Smp_049300	91.3112	63.765	2.43891	70.9924	99.1944	91.5358	14.3453	10.1185	37.9267	35.4128	46.9083	2.38361	49.6847	52.6099	50.7233	7.85204	5.24751	25.7738	31.6109	28.7907	34.4982	2.72883	2.74409e-94
Smp_094930	12.6248	17.0064	4.76167	6.09522	7.35858	4.47076	0.191313	0.224464	3.10154	11.0258	11.5322	2.73244	6.65606	9.60854	6.51221	1.05657	1.06205	3.32781	5.53385	3.53026	5.16252	2.67734	2.4723e-45
SmVG_012311:Smp_013570	133.698	141.142	0.785597	85.1603	99.3837	67.9061	48.3299	60.8618	43.7391	54.5397	50.3994	2.72079	47.4635	63.6992	52.9557	6.13102	6.21225	23.2462	35.2051	28.0132	28.2692	2.65076	5.6936e-126
SmVG_012311:Smp_129510	133.698	141.142	0.785597	85.1603	99.3837	67.9061	48.3299	60.8618	43.7391	54.5397	50.3994	2.72079	47.4635	63.6992	52.9557	6.13102	6.21225	23.2462	35.2051	28.0132	28.2692	2.65076	5.6936e-126
SmVG_012681	4.29004	6.59487	4.89732	2.60557	3.79898	4.26592	0.22317	0.342827	1.64079	5.69764	6.36185	3.06922	6.92841	8.54889	7.26315	1.58473	0.781435	3.79464	5.38377	4.42736	5.69247	2.62357	3.56879e-33
Smp_031390	5.37375	8.04332	4.73698	2.04526	3.71515	2.32397	0.124824	0.0904499	1.14865	12.1182	11.3241	2.8634	5.31375	11.2191	8.70246	1.50382	1.21492	2.9377	6.74261	5.06957	5.89585	2.51881	5.60923e-28
Smp_186020	13.0586	8.96194	2.97672	130.291	176.126	159.413	35.7499	28.1225	86.5008	10.1955	1.60936	2.65491	106.871	136.54	112.869	20.2809	18.3607	66.0914	98.5725	74.7836	92.4694	2.42609	6.15167e-85
SmVG_001063	17.3614	10.3491	1.54866	44.5699	48.3604	33.5711	13.4014	18.0214	22.7417	10.5663	15.596	2.31969	64.2554	72.3405	57.5228	9.56959	8.42296	31.426	40.0483	30.2828	38.0067	2.42452	9.55567e-97
SmVG_000890	15.7752	14.9811	1.80057	97.7184	78.305	64.7365	15.2381	21.0775	51.2565	6.64798	4.50861	1.92162	31.8809	29.6284	37.765	4.54212	5.59925	16.0405	16.8634	21.131	19.4586	2.36139	3.50905e-32
SmVG_011566	12.2455	11.9191	2.32995	15.8234	7.09099	8.15369	1.87525	1.04872	8.9313	12.7613	16.1655	2.39467	11.1293	10.0691	10.985	1.05818	1.56124	5.34604	6.03205	6.60351	7.10666	2.33701	2.26949e-14
SmVG_006198	58.2794	61.5558	1.65821	18.5612	15.4389	13.1494	8.33774	11.3381	20.9727	12.6089	15.6055	2.31399	4.84414	4.16834	4.51988	1.52736	1.79627	5.50837	5.30014	6.31797	5.76615	2.23257	2.4758e-33
Smp_125890	6.66897	6.10864	0.620095	4.04048	6.42137	5.21353	3.3382	3.93792	2.00066	6.3049	7.01712	2.3662	7.57883	9.2035	7.59152	1.31713	1.47291	3.65348	5.11929	3.96657	4.85669	2.21138	2.39495e-103
Smp_168130	4.52758	3.98301	0.71862	3.17726	4.78507	3.75453	2.08427	2.47518	1.56135	16.8999	16.0248	2.1635	18.9872	25.3636	18.5606	4.08666	4.00953	9.14649	13.9598	9.55158	12.3122	2.11924	4.10934e-92
Smp_132210	48.6846	59.2667	1.9766	27.2327	29.5905	22.0914	6.84022	6.66	14.0359	202.619	148.817	2.14852	145.437	183.476	100.476	26.0626	24.6301	71.5058	103.254	53.0055	71.5751	2.11037	1.03844e-50
Smp_004680	279.441	307.382	0.774208	153.681	181.549	138.819	80.6542	92.226	75.7788	592.588	597.577	2.09982	454.018	571.59	419.433	82.3864	86.0651	217.637	314.484	219.528	284.166	2.07515	1.55672e-83
Smp_124060	4.23032	4.69067	3.15021	3.88826	6.73725	6.54763	0.639628	0.690087	1.90879	2.93992	2.48299	2.18341	3.6412	6.79696	6.14636	1.06768	0.927317	1.76673	3.79615	3.24079	3.4432	2.06635	2.19618e-28
SmVG_019973	188.774	148.997	1.8463	151.932	137.711	92.3419	27.6789	34.9005	78.2446	69.8097	81.9652	2.02476	81.4763	74.7982	73.0701	15.2381	11.7529	39.5757	42.1703	41.1337	46.73	2.05347	8.17796e-37
Smp_133310	34.6567	46.5786	1.02535	20.982	22.7866	17.6588	10.053	11.004	11.2094	138.48	157.291	1.98425	125.494	137.038	112.545	27.1219	27.0925	64.7725	80.5191	63.4076	82.3772	1.9332	4.17373e-87
SmVG_022195	23.2587	26.5484	1.28715	82.3874	70.4557	64.9695	20.0875	23.0658	39.9103	24.8053	31.2358	1.4803	156.257	149.757	192.234	65.1956	47.2759	111.993	125.276	150.3	155.68	1.88556	7.47524e-31
Smp_201730	86.0167	110.959	1.68026	80.2985	86.4157	66.3575	35.0524	26.5355	42.8458	112.95	144.877	2.33009	220.295	246.787	274.599	54.1578	49.2636	114.017	145.374	153.946	149.817	1.87759	3.75639e-22
Smp_011960	9.36858	9.78801	0.626506	4.73278	8.17763	5.8173	3.53475	4.97008	2.38204	12.6722	16.5081	1.97003	12.4555	15.5706	14.129	3.5257	2.93517	6.09974	8.72858	7.48374	10.0051	1.86426	7.55142e-76
Smp_035560	1174.72	1858.37	1.50317	799.976	1350.65	1459.43	361.154	352.203	390.801	703.292	757.481	1.76476	698.1	1239.44	1322.28	232.432	231.6	335.764	685.397	683.986	719.302	1.82066	1.95912e-20
SmVG_034355	11.2691	10.1147	1.75261	5.27899	5.9437	5.12197	1.51205	1.71703	4.02538	9.34084	10.0287	1.8365	5.94475	6.93476	7.16577	2.7035	1.47212	4.5483	5.32956	5.05698	5.58965	1.79965	2.98734e-19
Smp_148770	106.341	97.7416	1.17299	56.4805	97.6826	74.5479	27.4445	39.3018	29.2959	35.3848	44.7891	1.81105	39.1242	53.126	45.3584	11.5711	11.5428	19.3516	30.0172	24.5922	30.9324	1.79537	1.76728e-54
SmVG_035883	10.0789	13.4918	1.48646	4.43852	5.37502	4.29379	2.67132	3.02912	4.29817	29.4214	26.9203	1.78881	18.1432	20.6058	18.9727	7.80671	7.9732	16.4628	21.2099	17.3945	18.2269	1.76919	8.6387e-47
SmVG_014816	8.15516	5.96876	1.63879	9.531	7.79121	6.71769	1.36981	1.28098	3.382	8.4589	11.4376	1.76193	9.47414	9.64614	12.0339	1.61882	1.21909	2.99056	3.73111	4.03821	4.16281	1.74695	1.04702e-17
SmVG_015350	2.91483	7.17261	1.21238	3.40401	2.15087	7.83845	1.14968	2.8348	3.14383	2.57889	2.62414	1.34512	4.74812	2.59162	3.34747	0.832318	1.28716	3.35379	2.01205	3.11616	3.98108	1.72784	2.46104e-06
Smp_027340	381.11	387.929	0.774782	153.774	223.858	139.851	81.3203	113.799	74.4681	191.668	179.79	1.73567	123.068	173.949	142.903	31.4436	35.6447	58.4212	94.8548	73.7909	79.3429	1.71907	6.72725e-62
Smp_174810	7.3851	8.41785	3.20346	7.05279	6.74978	3.9631	0.66961	0.76246	3.87008	44.985	54.7825	1.85056	61.5898	74.2515	63.3165	15.5764	18.3841	32.5239	44.0455	36	41.9031	1.71256	7.67491e-60
Smp_204430	2.06434	2.18973	0.681257	2.44492	3.88969	4.98296	2.2959	2.92119	2.13255	1.31458	1.7222	2.44225	3.74747	4.40499	4.57486	1.83375	1.55286	2.67543	3.3887	3.6403	4.11502	1.71039	3.00761e-27
SmVG_019850	128.216	117.981	1.12193	85.8946	81.9718	65.276	28.5263	39.7187	43.7197	31.59	35.3055	1.96293	31.2685	32.6868	30.621	8.70825	6.77082	15.2946	18.2786	16.3063	18.9443	1.70538	1.17566e-33
SmVG_001437	464.99	406.956	1.06269	466.231	428.051	392.691	142.98	182.095	219.082	151.512	216.861	1.90856	208.171	216.517	254.569	54.5256	55.544	95.689	114.011	128.277	139.947	1.68093	8.94438e-34
Smp_054120	54.9977	51.4479	0.781188	53.9396	50.2538	46.1534	25.0659	28.709	27.6336	53.353	63.7186	1.71473	78.8959	73.4769	68.807	16.6315	18.5995	39.2376	41.5887	37.3901	46.3898	1.67705	1.79977e-39
SmVG_007097	12.7115	9.51105	1.85178	4.65333	5.00181	3.90346	1.44964	1.50663	3.62163	9.84334	12.5648	1.82702	5.37133	6.22841	8.70965	2.33617	2.08886	3.42888	4.80624	7.02123	5.54068	1.67282	8.6549e-13
Smp_200900	50.1891	42.6271	1.26585	65.2734	69.8745	52.5109	18.6501	23.5389	30.2435	31.7145	45.8308	1.38502	68.0539	62.5626	76.8352	18.4325	17.7919	31.2322	33.4301	37.5749	44.6431	1.66335	8.79956e-32
SmVG_029994	12.0854	6.79686	5.62745	7.0627	12.5814	11.7878	0.827277	0.997184	3.64718	4.66008	7.36853	2.96128	13.4601	17.6142	13.7922	6.35447	1.43675	6.74753	10.2554	7.58319	8.62196	1.62024	9.74842e-08
Smp_065240	21.3867	19.0918	1.32489	13.139	14.7643	13.5418	4.82577	5.37689	6.32532	15.3491	20.8732	1.81522	18.2591	16.5184	18.4927	4.52406	3.9779	8.67057	9.08658	9.44159	10.6509	1.60986	1.04618e-31
SmVG_030815	8.35184	9.10295	1.42342	7.50444	12.2556	11.0856	3.91314	4.64225	5.71214	18.2069	27.2642	1.90967	23.3782	25.4822	29.0076	13.8351	8.08231	16.9908	19.9917	23.0113	25.5209	1.60733	4.25689e-16
SmVG_012551	9.07602	10.8798	1.81231	7.79058	6.57874	7.32618	2.24668	2.53826	4.46053	8.11015	11.0563	1.55429	8.23729	9.02831	11.9904	3.18187	2.60776	4.57612	5.84039	7.245	7.38562	1.59093	2.38545e-14
SmVG_030694	15.5714	18.0768	1.88944	10.4044	12.2939	9.37261	2.26828	2.09361	4.22867	10.618	9.86741	1.341	6.80061	10.3123	6.27654	2.30008	2.30301	3.25444	6.00233	3.16309	5.08296	1.58756	1.56396e-14
Smp_202870	43649.6	46799.3	1.7851	4192.34	3577.33	3117.91	38617.4	27197.3	84823.4	19527	16755.6	1.57429	2542.15	1645.92	1389.16	15526.3	17425.7	55638.4	39780	33154.5	32762.3	1.58348	3.64822e-08
SmVG_023010	13.0098	11.9988	1.18823	2.36588	5.95593	4.01453	2.28567	3.23174	1.77095	4.22228	5.23027	1.71006	2.96459	2.46342	2.66454	1.0735	1.05014	1.97301	2.30575	2.1033	2.46297	1.58268	1.23843e-14
SmVG_002729	16.7419	26.8383	0.972646	12.2348	11.6317	13.1282	6.50795	5.98741	6.08365	21.1647	32.6356	1.514	19.9112	24.4441	23.2913	6.68711	6.91145	9.88209	14.0805	13.1243	19.4103	1.57139	2.3616e-16
SmVG_014957	16.015	12.8636	1.14726	31.8666	45.3051	32.6671	13.8849	14.0811	21.4693	17.9809	25.8469	1.88364	47.5876	48.4753	58.582	29.5783	18.7696	31.0031	41.9914	45.8897	49.7579	1.55865	1.63106e-15
SmVG_022281	12.1398	12.1343	1.56023	9.52493	8.49033	9.81622	2.42296	2.39213	3.52734	11.2389	15.5795	1.44919	11.47	10.9579	14.0406	3.37336	3.27568	4.79597	5.48083	6.61255	7.72757	1.54245	6.95276e-15
Smp_028990	6.97031	6.77911	0.782774	3.96529	5.11123	4.49558	2.43639	2.58377	2.05678	17.2855	18.283	1.54225	14.3449	18.071	15.278	4.79106	4.108	7.07945	10.2023	8.22457	9.86373	1.53168	7.66444e-70
Smp_034500	9.34278	10.1015	2.24537	4.69635	6.41617	3.52979	1.14066	0.995394	2.39947	12.743	10.7474	1.58607	8.68554	13.1478	9.30808	2.64614	2.6256	4.19495	7.33236	4.89398	5.64462	1.52886	5.08928e-49
Smp_099150	394.326	399.795	1.09827	292.346	349.517	243.671	123.534	148.346	149.936	489.884	482.355	1.57067	570.66	655.857	535.924	157.372	154.011	277.878	362.413	282.938	309.943	1.51608	2.53682e-49
Smp_144240	9.02794	8.51826	0.889864	4.34364	6.7817	3.9731	2.47326	3.43334	2.34747	7.85062	9.63055	1.62167	7.88845	9.93797	8.1487	2.7216	2.61956	4.06237	5.70131	4.55926	5.78716	1.51404	1.21097e-26
Smp_072720	379.271	430.655	0.672941	191.936	262.836	172.854	123.409	151.52	100.536	860.752	921.98	1.53777	735.932	911.405	702.127	221.128	227.728	369.141	512.82	379.075	475.269	1.5068	1.57519e-53
SmVG_001093	12.4576	10.5198	1.2879	7.93765	10.8043	9.7324	4.39533	5.65168	6.3886	13.7643	14.0689	1.63785	13.2472	12.5796	15.9631	6.61475	5.24042	9.69506	10.4218	12.2645	12.6245	1.50485	7.91656e-18
Smp_161080	23.6888	29.5018	0.708564	10.7799	14.8616	9.52083	7.49485	8.06965	5.54399	59.3494	49.3534	1.53888	41.0266	56.4514	32.6631	11.2235	12.4303	20.2784	31.7624	17.4273	24.4267	1.49645	9.77732e-32
Smp_158280	9.89774	7.84244	0.85501	7.46997	10.7913	10.4689	7.81076	9.00392	5.296	15.2275	16.2448	1.60401	22.0468	25.2444	20.4963	8.97046	8.73522	15.6601	20.405	15.506	19.0444	1.49031	3.79074e-49
SmVG_019168	28.6778	23.9773	1.56007	29.19	25.8302	18.1861	6.43785	7.67831	14.4513	4.52627	5.02384	1.56395	5.69576	5.50352	8.17495	1.81173	1.39638	2.73498	3.0758	4.2343	3.2891	1.48567	1.58127e-12
Smp_076630	43.1525	35.0089	0.432956	30.6373	44.8565	36.2618	24.888	31.7958	14.8814	54.8616	54.86	1.59729	66.9586	84.8459	60.569	19.2114	20.4112	32.1569	46.7552	31.3828	41.5835	1.48506	5.74072e-57
SmVG_020356	19.1107	14.9844	1.71328	50.8053	66.2473	50.5666	14.4031	19.1524	31.0585	17.1374	15.7454	1.29723	92.438	102.193	117.308	39.662	36.8934	55.3023	70.5355	70.1449	86.998	1.48361	4.07557e-18
Smp_075770	44.5856	54.138	1.56692	30.249	37.2709	14.5756	8.32854	9.9029	15.8757	210.445	159.099	1.44142	145.946	239.774	145.991	48.4017	43.6877	72.5236	135.807	78.4516	102.362	1.47297	1.96389e-37
Smp_067480	220.623	234.76	1.32009	139.277	173.577	116.435	49.2945	56.8009	66.3082	282.593	250.889	1.51246	250.589	340.229	262.484	76.2222	70.0672	116.436	183.983	131.548	146.345	1.46824	6.6606e-54
SmVG_001147	13.5023	10.918	1.89483	14.3681	13.82	14.5932	3.64999	3.42414	7.85424	6.9778	15.4484	1.64515	12.1321	11.7593	15.0673	5.39654	4.93652	6.62521	7.07297	9.68158	14.0846	1.46412	5.05042e-10
Smp_123240	129.032	106.537	1.15785	80.5148	94.2144	82.3213	32.4586	42.2949	43.457	83.8336	103.96	1.40861	84.728	91.1234	108.021	27.8506	29.2716	43.0351	52.4099	59.0542	58.0049	1.45921	1.35227e-19
Smp_080370	589.117	689.128	0.842848	470.159	439.089	434.576	210.671	242.587	234.287	689.693	862.698	1.45167	813.221	740.072	766.211	198.851	214.2	394.334	405.235	409.209	457.273	1.45777	9.2009e-23
Smp_162380	8.82167	7.58185	1.22393	10.5998	14.5641	12.4975	5.23691	6.6647	5.36109	7.28718	11.1621	1.74095	18.9875	19.4581	18.7352	6.13646	5.42316	9.47493	10.9547	10.0536	12.0411	1.45258	8.49489e-43
SmVG_009175	13.1643	10.6227	1.44962	29.0934	25.8041	28.9901	9.06253	9.72851	19.1593	11.8656	13.4802	1.07213	33.99	34.9722	45.2904	15.6788	13.2233	21.2479	25.6632	29.6664	29.9128	1.43959	1.15941e-15
SmVG_020596	3.54079	3.39485	0.825427	1.6406	3.24679	4.16617	1.24269	1.82492	0.831674	2.51362	4.29594	1.38624	2.9352	3.08717	2.69825	1.01573	1.04215	1.46423	1.76491	1.39905	2.65815	1.43738	3.3451e-13
SmVG_001391:Smp_081900.1	70.3731	91.9502	1.46007	62.2916	66.869	42.5437	25.9239	25.2728	31.9684	173.814	147.624	1.6365	220.064	308.305	215.399	66.4783	62.4939	108.737	174.096	115.193	119.051	1.42897	2.64204e-33
SmVG_001391:Smp_081900.2	70.3731	91.9502	1.46007	62.2916	66.869	42.5437	25.9239	25.2728	31.9684	173.814	147.624	1.6365	220.064	308.305	215.399	66.4783	62.4939	108.737	174.096	115.193	119.051	1.42897	2.64204e-33
SmVG_001391:Smp_166340	70.3731	91.9502	1.46007	62.2916	66.869	42.5437	25.9239	25.2728	31.9684	173.814	147.624	1.6365	220.064	308.305	215.399	66.4783	62.4939	108.737	174.096	115.193	119.051	1.42897	2.64204e-33
SmVG_024915	6.24751	6.40752	1.62545	44.3078	41.2155	30.9861	21.4791	26.2103	27.6913	14.3253	13.6999	1.77099	122.519	151.242	130.884	45.0793	47.8233	75.5229	106.824	84.1123	83.8218	1.40918	9.77278e-31
Smp_201930	346.179	158.994	1.9897	2441.93	2833.51	2491.3	897.281	918.976	2147.32	45.461	39.036	0.935995	1150.61	816.448	665.13	442.63	403.139	1005.99	802.722	650.665	703.587	1.39843	2.08069e-11
SmVG_000939	23.7024	35.813	1.71388	32.4253	25.8039	43.7352	9.17622	12.7601	16.1475	38.3828	38.8605	1.28682	47.3374	57.5579	56.2342	15.0792	18.431	22.189	31.9098	28.9323	29.8612	1.39431	6.46053e-17
Smp_146360	3.88241	3.67796	0.735789	3.97699	5.30422	3.39335	2.49224	3.4354	2.25714	3.6765	4.97247	1.51276	6.10605	7.85991	5.89507	2.52551	2.23202	3.74576	5.20211	3.78851	5.17846	1.39411	8.25645e-26
Smp_021340	174.954	182.882	0.494778	80.3859	122.734	100.615	65.7778	74.9153	39.6813	472.953	537.907	1.48941	417.698	520.033	387.666	134.007	141.919	200.293	286.324	200.808	276.097	1.385	8.36532e-42
SmVG_024710	5.0909	5.03057	1.74767	2.1021	2.97687	3.00856	1.60571	1.9918	1.77688	10.5046	10.2104	1.90851	4.45732	5.6651	7.55683	4.15032	2.85252	4.53011	6.03514	6.26675	7.08558	1.38456	3.64193e-15
Smp_008660.1	342.713	378.563	2.31359	488.241	519.221	287.079	81.3179	85.1097	261.116	530.275	477.345	1.45648	874.711	1175.63	921.296	293.046	269.219	446.106	670.581	513.536	543.162	1.37447	5.13148e-40
SmVG_008483	11.9887	10.7303	1.5646	8.55137	7.58665	7.40471	2.03333	2.5333	4.47959	7.57559	12.5795	1.46305	7.19153	7.3979	9.8262	2.95085	2.45406	3.62026	4.17284	5.4205	6.63578	1.37357	2.12313e-11
SmVG_012416	5.77958	3.8842	0.811996	10.567	11.451	8.57995	2.87423	3.55907	3.75524	3.71042	4.81075	1.10392	8.97827	8.77161	10.3958	2.94364	2.28857	3.66588	3.84155	4.35829	4.78284	1.36718	3.10005e-19
Smp_090520	250.719	237.35	1.4976	237.435	297.497	194.038	72.5811	93.8361	111.824	44.2473	43.9108	1.41372	55.8653	67.6655	58.7013	15.8088	18.4746	25.674	36.246	29.2038	29.8529	1.36464	8.09368e-33
Smp_062080	12.7061	9.33296	1.04568	4.43056	9.28633	6.83718	4.06495	4.24263	2.28744	8.12124	7.05789	1.43061	8.29467	9.91482	7.10127	2.38546	2.53505	4.144	5.62618	3.90077	4.80867	1.36107	7.27323e-21
Smp_032950	43.9458	35.6989	1.86261	30.5071	27.8638	24.7673	6.36601	7.16169	14.961	70.9505	95.1475	1.38202	69.8297	64.8778	81.5923	22.1446	20.1554	33.8327	35.7423	42.4744	43.3209	1.34861	1.1348e-19
Smp_030500	163.347	164.083	0.839386	108.26	127.947	87.3104	52.6127	65.5685	55.6605	285.165	299.648	1.35025	288.863	332.871	265.936	87.5245	89.4204	144.344	188.7	144.187	177.614	1.34806	1.67042e-40
Smp_169340	112.293	90.4581	1.24035	125.628	125.374	104.66	43.3837	56.8168	63.1105	46.7476	62.1855	1.59859	89.9558	82.15	82.3862	26.6125	26.9162	43.7918	45.6288	44.8578	51.2124	1.34148	3.04463e-19
SmVG_023439	74.0967	75.5277	1.00958	28.36	32.8452	19.0828	13.8992	17.4521	20.34	409.997	459.455	1.29006	208.216	284.81	283.812	92.6165	94.8556	130.906	193.495	194.075	197.642	1.32785	4.88678e-14
SmVG_000782	11.5361	11.6894	1.14125	34.5726	29.9524	25.4934	8.0913	10.2605	17.0652	14.8298	15.9449	1.70517	35.8848	37.3334	37.8887	11.2821	11.833	17.2093	20.5927	19.5339	19.3026	1.32676	3.61427e-20
Smp_181470	3.74578	4.49136	1.38958	3.07993	4.84168	2.82483	1.37148	1.61379	1.64357	6.81422	4.96041	1.41551	10.6138	13.9577	9.23988	3.14448	3.11051	5.47509	8.05688	5.12174	5.62541	1.30374	5.83777e-24
SmVG_034350	2.8116	3.21195	1.53309	2.52281	2.8248	2.90311	1.09962	1.19407	1.52019	2.08739	3.19675	1.91434	2.85612	2.93493	4.36578	1.7095	1.31615	1.77658	1.93915	2.65928	2.87298	1.29186	3.83753e-09
Smp_214070	88.2455	76.2625	0.974967	67.9925	67.0694	52.9734	23.844	27.9111	30.6982	52.513	61.7554	1.21927	59.1181	57.3101	60.9429	17.2682	16.9678	26.5585	30.0393	29.2294	31.1727	1.28604	4.15588e-23
Smp_010370	201.967	211.627	0.893225	101.855	126.752	73.8504	51.9689	53.4782	48.4016	169.258	149.738	1.28448	104.201	156.546	143.828	42.4984	38.0929	49.931	86.5689	72.9078	67.5296	1.27704	1.85897e-28
Smp_024490	183.124	199.759	0.71552	97.8027	134.032	114.816	69.3966	95.4204	60.7516	67.4817	62.7926	1.2541	53.3308	74.5201	59.7523	24.6612	22.9786	32.308	49.7534	37.7914	42.8195	1.26589	1.02905e-48
SmVG_008326	88.84	84.237	1.29792	23.6117	45.5106	32.4658	12.2427	18.6355	12.8231	131.283	184.169	1.17482	90.1486	102.036	125.522	53.2735	43.7376	46.5544	58.2738	70.9676	77.3019	1.24543	2.4256e-05
Smp_193150	87.0608	62.0839	1.75071	105.241	107.126	92.2816	22.7108	33.0656	55.6035	41.8176	49.2265	1.4135	77.8091	77.4079	86.6892	31.3922	27.9761	39.5055	43.5042	48.0423	52.3429	1.2444	1.05598e-16
Smp_042390	21.6819	19.3985	0.611499	10.1191	13.9644	13.521	6.37342	8.46547	5.05282	18.7988	23.0462	1.35617	16.2359	17.8705	17.1807	6.40853	6.04613	7.9723	10.1894	9.14133	11.6537	1.24324	4.45286e-29
SmVG_024638	2.24688	1.57686	1.30383	2.75642	2.97948	2.67284	1.27121	1.43336	1.5749	4.41174	4.61585	1.27993	7.4399	7.13413	7.27459	3.45797	2.63737	3.99934	4.71499	4.41341	5.9701	1.23838	6.64237e-15
Smp_087330	32.3161	33.0354	0.754486	16.0838	19.6578	14.942	8.04777	11.0363	8.13616	36.7336	34.8665	1.20924	28.136	34.7033	29.735	10.2397	9.57473	13.6299	19.261	15.6705	16.8562	1.22632	4.9685e-32
Smp_033930	16.48	15.0477	1.44415	11.8225	14.2552	8.23557	3.85336	3.35872	6.27278	9.1713	8.4149	1.02313	9.2432	10.8515	7.16842	2.9104	3.49429	4.6274	6.38683	4.01879	6.3877	1.22264	2.44443e-13
Smp_011000	6.68551	7.42558	0.776321	5.80555	7.44003	4.75046	2.80207	2.81605	2.84522	12.101	8.69175	1.11006	11.9156	17.7813	12.7689	4.21942	3.6801	5.67092	9.81233	6.64538	7.08815	1.2167	1.10201e-22
SmVG_015361	9.75766	7.9489	1.73303	5.61996	6.34942	5.96976	1.58141	0.973275	2.71356	20.1443	24.9885	1.22961	15.7428	18.8699	22.4487	8.94643	5.29737	7.84057	10.5047	11.3392	11.3125	1.21338	2.91697e-10
Smp_043580	36.5907	33.0851	1.0573	15.1623	25.174	18.8709	8.08816	10.7177	7.45691	25.8917	34.2057	1.25984	22.1594	27.1705	25.4347	11.2417	8.64166	10.5988	14.9066	13.127	17.7404	1.20879	4.16956e-17
SmVG_008110	22.9757	22.8302	1.41987	5.78344	9.60531	8.20512	5.47104	4.88773	6.74262	27.9881	33.5446	1.20067	9.17186	14.0979	9.13285	9.6803	9.21185	13.6203	15.5171	9.55555	15.7395	1.19507	8.59845e-11
Smp_178100	12.0674	10.7935	0.880193	12.1208	15.6184	11.3461	6.54763	7.54915	6.56556	19.5404	24.6911	1.28821	47.6769	42.0276	40.8993	17.5764	15.6932	25.0552	25.0692	23.4157	28.5784	1.1938	6.40302e-16
Smp_168960	5.35259	7.37819	1.20674	3.39904	3.9881	2.93085	1.66453	1.56752	1.82415	14.8645	14.2614	1.23318	12.5927	17.4911	10.2945	4.70309	4.32662	6.41823	10.1299	5.684	8.46774	1.19322	9.35802e-24
Smp_023270	50.2374	40.6511	0.757697	24.6649	39.9666	38.5675	18.1806	21.0277	12.7605	72.9201	92.5046	1.25223	70.9297	87.7969	88.848	33.1909	28.6563	34.8949	48.9933	46.859	53.9813	1.19265	6.04084e-28
Smp_073680	66.3772	51.5044	0.858661	49.8873	72.5293	81.005	29.5991	36.6669	23.226	88.8382	117.372	1.31816	130.01	158.48	147.682	59.0396	49.9871	59.0159	84.1939	72.2407	91.3268	1.19088	2.08959e-28
SmVG_014983	24.4517	17.1303	1.79562	9.15265	12.709	12.6423	5.29796	5.00102	7.68701	19.0798	32.5249	1.14836	13.7914	14.3949	15.6913	9.59714	9.2502	10.8785	12.5885	12.5802	16.7822	1.1878	1.69385e-11
Smp_036630	19.4751	14.7818	0.751123	11.0277	16.5454	12.8032	6.38636	7.60639	5.23799	34.509	43.249	1.19947	37.5263	45.2521	39.0591	14.4657	12.9666	17.4536	24.2167	19.4612	25.7136	1.18331	4.65049e-32
Smp_095460	10.6246	8.58379	1.03361	2.15902	3.75436	5.10376	2.92869	2.89321	2.64051	9.94859	15.718	1.07548	4.0982	5.09554	7.31236	4.69829	3.77097	4.31091	5.27646	5.99696	7.42086	1.17543	1.36602e-09
SmVG_015953	6.6908	7.9426	0.844055	3.6645	4.95229	7.31363	3.92557	4.75008	3.77899	6.60022	6.98545	1.13572	5.64383	7.36539	6.97669	4.06474	3.46681	4.67705	6.83464	5.97512	7.60007	1.16986	1.02215e-15
Smp_002080	341.232	385.778	0.668821	317.325	329.875	340.722	177.888	211.006	152.282	223.256	271.415	1.14646	339.688	319.75	275.124	94.9816	111.806	160.713	173.868	143.053	183.808	1.16929	2.54351e-19
SmVG_035362	8.8823	6.67615	0.955211	6.3624	11.0339	9.08233	3.35061	4.47128	3.31721	7.0407	7.50684	1.53196	14.8464	12.1521	14.4705	6.04683	4.81987	7.06344	6.55881	8.41607	7.8952	1.16745	7.55011e-09
SmVG_033248:Smp_105070	60.9979	55.3347	0.81443	31.7832	39.9001	32.8836	16.6787	21.6537	15.8873	35.8871	39.6277	1.18969	27.6622	34.0543	29.4535	10.6293	10.3978	13.5865	19.0107	15.5538	18.9541	1.16382	4.18293e-39
SmVG_033248:Smp_105080	60.9979	55.3347	0.81443	31.7832	39.9001	32.8836	16.6787	21.6537	15.8873	35.8871	39.6277	1.18969	27.6622	34.0543	29.4535	10.6293	10.3978	13.5865	19.0107	15.5538	18.9541	1.16382	4.18293e-39
SmVG_011637:Smp_075030	13.4313	13.8742	0.41143	7.62029	10.6382	8.28839	5.6943	6.43879	3.92038	28.4909	30.2322	1.15156	26.0218	32.4478	26.9552	10.0313	10.068	12.7524	18.2687	14.4053	18.2328	1.15648	9.58618e-42
SmVG_011637:Smp_162650	13.4313	13.8742	0.41143	7.62029	10.6382	8.28839	5.6943	6.43879	3.92038	28.4909	30.2322	1.15156	26.0218	32.4478	26.9552	10.0313	10.068	12.7524	18.2687	14.4053	18.2328	1.15648	9.58618e-42
Smp_008470	77.1584	75.8233	0.644465	51.5889	73.775	53.0812	32.1743	37.9975	24.5965	148.601	135.796	1.21933	147.922	210.306	155.084	59.4976	58.0197	68.2978	112.7	78.3141	93.6148	1.14251	7.74015e-40
Smp_202770	131.602	99.7546	1.08294	104.842	99.6382	75.5044	30.0052	34.6328	50.9264	22.7266	33.118	1.21361	22.2623	26.3232	34.0866	10.2575	9.08774	10.5462	14.5127	17.2681	17.9051	1.14217	5.71393e-14
SmVG_023139	8.90914	9.89882	1.27103	6.58454	7.39722	5.30579	3.3582	3.64336	4.62565	5.82589	5.99238	1.35169	6.44267	6.93641	6.09801	3.29646	2.60182	3.84818	4.92393	4.09386	5.79225	1.13848	1.94572e-12
SmVG_000139:Smp_003760	1136.3	1050.27	0.950631	643.954	760.528	555.226	278.641	355.617	309.794	811.002	804.526	1.15253	664.815	795.444	696.909	238.996	232.112	303.075	418.881	339.397	370.719	1.13345	1.38013e-28
SmVG_000139:Smp_003770	1136.3	1050.27	0.950631	643.954	760.528	555.226	278.641	355.617	309.794	811.002	804.526	1.15253	664.815	795.444	696.909	238.996	232.112	303.075	418.881	339.397	370.719	1.13345	1.38013e-28
SmVG_030605	5.43766	4.16174	1.09149	5.20912	9.5551	10.187	7.28713	9.84261	5.97195	5.05007	4.39832	1.89581	7.08668	8.83292	8.37293	9.66567	7.26888	9.99185	12.8771	9.65852	15.3756	1.12248	8.02795e-13
Smp_129310	25.9378	30.2611	0.94987	17.135	21.5053	15.5279	9.83615	11.6966	8.79309	19.0335	19.9371	1.31388	21.4792	26.127	22.2431	8.11713	7.71767	10.7091	14.6121	11.5613	12.172	1.11163	2.49548e-30
SmVG_007642	13.9471	6.77226	1.32248	5.42939	7.94543	5.99914	2.33148	3.00142	4.36432	12.0006	17.8258	1.2983	9.98977	7.80573	10.9895	6.95156	5.53162	7.16315	7.25317	8.85572	9.11352	1.09471	5.91118e-07
Smp_075130	28.5189	30.224	1.23115	29.4699	27.9337	22.3129	12.1132	11.2807	15.1529	67.0074	68.5632	1.10472	109.707	115.822	90.182	39.1915	36.2327	54.1107	64.8679	47.9836	57.086	1.08757	1.05508e-25
SmVG_032340	10.2149	9.00128	0.751617	7.61023	8.63474	7.01612	3.84393	4.98948	3.92522	15.2444	17.5242	1.09773	21.2614	20.8553	18.6525	7.18992	6.67669	10.3787	11.6981	9.77961	12.1026	1.08596	1.16022e-18
SmVG_011955	41.2841	27.6931	0.747113	12.7878	26.5557	29.3524	15.0663	17.519	10.9058	25.5024	33.335	0.925787	19.7213	23.7807	28.8009	17.1777	13.7458	14.0605	19.3446	20.8525	23.2438	1.08264	1.54111e-09
SmVG_012423	62.8327	52.7906	1.12783	28.5316	30.8346	30.6429	17.1477	20.0643	24.4269	47.4602	73.0153	1.09038	35.8754	33.0632	37.0967	22.259	22.0604	28.0821	30.2282	33.0042	40.641	1.07786	4.67458e-13
SmVG_011109:Smp_033590	11.0435	9.43785	0.77259	6.34299	9.14045	7.83237	4.0053	5.19017	3.11416	10.978	12.7545	1.15408	10.9991	14.1364	12.1124	4.84098	4.24748	5.25379	7.73404	6.22754	7.54042	1.07658	2.58757e-40
SmVG_011109:Smp_210160	11.0435	9.43785	0.77259	6.34299	9.14045	7.83237	4.0053	5.19017	3.11416	10.978	12.7545	1.15408	10.9991	14.1364	12.1124	4.84098	4.24748	5.25379	7.73404	6.22754	7.54042	1.07658	2.58757e-40
SmVG_011109:Smp_210170	11.0435	9.43785	0.77259	6.34299	9.14045	7.83237	4.0053	5.19017	3.11416	10.978	12.7545	1.15408	10.9991	14.1364	12.1124	4.84098	4.24748	5.25379	7.73404	6.22754	7.54042	1.07658	2.58757e-40
Smp_168140	19.6097	19.7361	1.76829	7.92044	10.3912	7.63512	2.34082	1.76201	4.45252	43.0695	43.7193	1.08371	35.8193	34.7482	26.0895	13.9328	13.0234	19.3747	20.9447	15.1975	19.9599	1.07618	8.02284e-14
Smp_143580	7.24968	8.14973	1.40348	10.412	9.96816	9.22536	2.58893	3.08114	5.19004	7.6816	7.84528	1.2486	8.85368	11.7931	12.9137	5.15014	3.09554	4.29956	6.48514	6.77204	6.8443	1.06707	3.02991e-09
SmVG_028687:Smp_077000	10.9837	9.14696	1.07627	8.50812	10.0131	7.71566	3.44707	4.41947	4.30851	10.1409	9.35473	1.14499	11.1397	13.5936	11.6029	5.20016	4.23147	5.39402	7.62727	6.11948	6.93885	1.05889	9.7411e-22
SmVG_028687:Smp_077010	10.9837	9.14696	1.07627	8.50812	10.0131	7.71566	3.44707	4.41947	4.30851	10.1409	9.35473	1.14499	11.1397	13.5936	11.6029	5.20016	4.23147	5.39402	7.62727	6.11948	6.93885	1.05889	9.7411e-22
Smp_113620	10.6689	8.9765	0.984823	31.1701	30.7442	28.1976	13.862	16.9888	16.1353	8.24276	10.6636	0.825509	34.4831	35.2497	38.108	15.2801	12.8124	17.1799	19.9622	20.4682	21.7517	1.05827	3.18966e-19
Smp_195060	6.40598	5.44115	1.07689	29.1851	31.1356	26.8566	10.9954	14.5567	15.2457	8.76054	9.81045	0.861289	57.2907	66.7501	54.7087	23.1952	21.3485	28.7327	37.6705	29.6089	36.5133	1.05715	1.50867e-28
SmVG_000581	31.7651	30.8553	1.3653	12.9301	17.5598	17.9724	5.63301	6.45923	8.02037	21.8221	24.1531	0.953011	10.9434	15.9663	15.9202	8.13768	5.97628	7.8212	11.3539	10.2	11.1463	1.04947	7.60142e-10
Smp_153350	25.2417	20.8623	0.434994	15.3832	26.2103	24.0011	13.3577	16.7225	7.7328	20.0766	27.4714	1.11706	26.266	31.3785	28.0628	13.0152	9.9662	12.6602	17.2783	14.6921	19.1434	1.041	3.56559e-26
Smp_075040	4.21075	2.4145	0.727156	16.0382	14.3359	14.2799	4.44541	4.69307	6.2859	3.58316	4.4009	0.807391	16.1761	13.8189	15.5999	4.94644	4.18035	6.45198	6.30445	6.7635	7.72764	1.03216	4.17549e-11
Smp_105370	7.48317	6.59481	0.445056	4.22161	6.17329	4.59537	3.07012	3.67298	2.11075	4.38354	4.24144	1.0736	4.49703	5.63432	5.05287	2.15966	1.69908	2.1676	3.1226	2.67017	2.75047	1.03152	2.85884e-24
Smp_065170	42.2748	39.2233	0.534973	21.3965	29.8452	24.4552	16.3926	20.3567	11.1055	42.1484	49.8069	1.09245	47.5417	46.6239	46.5275	17.5687	18.4046	23.4784	26.3839	24.5693	26.1732	1.02903	4.15123e-16
Smp_021070	16.8332	12.885	0.327427	8.47028	13.7566	12.6079	7.65181	9.2551	4.27253	9.99211	9.21659	1.03476	9.19597	11.674	10.7421	4.19335	3.45702	4.38683	6.45202	5.6182	6.1697	1.02821	3.64938e-19
SmVG_019103	8.92483	5.80844	2.64712	2.94607	7.55509	6.23796	0.959013	1.53446	2.13245	11.5253	14.8524	1.23796	12.9332	16.1857	15.4625	8.585	6.70919	7.51024	10.3083	9.41649	12.6367	1.02643	3.22311e-14
Smp_126860	62.2597	67.4283	0.69991	53.327	68.508	66.3595	42.5279	50.5885	27.086	53.2596	64.2658	1.18188	83.2954	85.6418	74.7493	32.0103	33.261	42.257	50.4864	38.7215	50.0837	1.02451	3.953e-20
Smp_058350	79.7132	67.8823	0.989277	99.5361	108.631	104.579	49.5018	62.8667	49.9308	60.4778	92.838	1.24397	143.367	135.457	137.807	52.953	55.6523	68.5735	74.2335	71.9566	88.4769	1.00865	2.83088e-15
Smp_009530	30.4035	29.9592	0.955881	26.5555	30.4036	23.2069	13.0498	16.1006	14.584	18.171	26.8924	1.12628	26.5754	26.5921	25.5939	12.014	11.0729	13.5984	15.9435	14.3104	21.3895	1.00724	3.53838e-12
SmVG_007811:Smp_034300	5.54069	6.66732	0.741235	2.0033	3.25455	2.18947	1.48066	1.8011	1.06894	11.7633	11.234	1.03302	8.30806	10.0826	6.32598	3.19466	3.1819	4.18946	5.75853	3.45999	5.10356	1.0026	1.40236e-18
SmVG_007811:Smp_034310	5.54069	6.66732	0.741235	2.0033	3.25455	2.18947	1.48066	1.8011	1.06894	11.7633	11.234	1.03302	8.30806	10.0826	6.32598	3.19466	3.1819	4.18946	5.75853	3.45999	5.10356	1.0026	1.40236e-18
SmVG_007811:Smp_140710	5.54069	6.66732	0.741235	2.0033	3.25455	2.18947	1.48066	1.8011	1.06894	11.7633	11.234	1.03302	8.30806	10.0826	6.32598	3.19466	3.1819	4.18946	5.75853	3.45999	5.10356	1.0026	1.40236e-18
Smp_001500	222.235	234.963	0.84945	120.171	136.814	118.991	64.9248	73.384	60.5495	173.193	219.338	1.01466	139.113	155.881	166.813	62.1299	56.7696	68.146	87.0421	87.5501	100.92	1.00235	3.61556e-18
SmVG_024807	5.11958	5.49533	0.448991	4.16004	4.82675	4.0765	2.5249	2.92694	2.04476	9.88212	11.3504	0.847755	9.24991	12.8068	12.8359	5.15325	4.11634	4.48217	7.11639	6.67854	6.96471	0.995373	6.68439e-18
Smp_058690	403.102	384.905	1.49852	715.221	731.777	494.504	219.317	309.198	412.305	102.503	112.633	1.12256	304.904	305.066	298.47	120.724	129.905	166.622	186.495	180.463	180.485	0.988455	3.4576e-15
SmVG_019737	1.698	0.429786	1.06715	2.349	5.01509	3.45759	2.08913	3.33004	1.46699	2.43881	4.28492	1.81666	4.47992	4.57005	4.01316	2.34133	1.68986	2.38404	2.88548	2.33353	3.73021	0.985432	2.95333e-09
Smp_201810	9.10531	7.85471	1.30564	4.01127	7.21501	5.66256	2.91876	3.79152	2.73327	2.72813	3.8114	1.52526	4.02411	4.09132	4.79846	3.09826	2.0882	2.59122	3.12609	3.28142	3.82548	0.985373	8.42522e-10
SmVG_029453	6.0165	4.25702	1.08417	6.05935	6.26861	7.11357	2.30133	2.53313	3.37056	6.32555	7.61158	1.08737	8.37537	10.3655	6.96862	4.67378	3.19346	4.19625	5.5014	4.17483	7.26431	0.984553	3.73836e-08
Smp_201210	42.6172	29.5026	2.58717	23.0969	32.2109	20.175	3.4982	3.99143	13.1783	79.7322	103.615	0.890834	74.7875	84.6556	111.244	35.4582	36.7963	39.7347	50.2632	65.9718	61.4084	0.983395	3.44591e-05
Smp_074560	6.76465	4.48941	1.21431	2.68984	5.3216	5.58703	1.67564	2.19455	1.41902	39.1018	70.7787	1.05222	35.1105	44.3166	43.0335	26.9036	18.0666	17.6099	25.3697	23.3413	39.9035	0.973848	1.62845e-06
Smp_071880	16.5191	15.2013	0.794785	11.4626	17.2561	13.0713	7.21139	8.73727	5.48412	15.5374	18.5035	1.04153	19.7538	23.8344	19.8676	9.74183	8.46763	9.38181	13.1457	10.1163	13.1703	0.970886	6.53358e-25
Smp_090340	12.3377	6.52743	1.09134	7.35801	13.8124	9.18173	4.21876	5.42717	3.42963	3.72224	3.07267	1.12039	5.09791	7.31609	5.71846	2.07768	2.32173	2.3739	4.01031	2.86567	3.27249	0.968153	1.15875e-09
Smp_167570	91.5055	87.0548	1.00589	92.2524	108.173	92.6701	38.2188	43.8715	38.2317	60.5317	64.4967	0.866285	78.5761	96.1446	94.836	33.9116	30.5422	32.8644	47.8223	42.0709	44.6175	0.966448	2.65161e-23
Smp_019990	91.9434	85.2861	0.646481	43.901	81.7371	59.0711	39.3695	47.6197	23.2964	151.46	181.009	1.04545	190.41	217.465	201.265	87.3573	85.5027	95.7508	123.844	109.947	130.791	0.965468	3.73521e-22
SmVG_014594	108.482	108.894	0.789033	73.507	72.6155	64.6808	37.1006	40.9852	37.1248	99.7551	117.434	0.966932	102.681	101.029	100.256	39.7184	42.0391	49.1053	55.7372	52.3056	58.9739	0.963852	7.83692e-12
Smp_060090	837.442	759.865	0.910479	1100.75	905.834	942.013	473.459	574.132	491.62	544.465	704.959	1.16245	953.938	827.818	843.408	354.587	344.78	461.467	462.937	407.797	519.47	0.956572	1.12542e-10
Smp_045810	13.4347	12.3864	1.05349	19.0106	22.3906	17.4668	8.96356	10.9039	9.51072	9.13811	11.9631	1.05339	18.0393	25.22	22.1846	9.18776	8.39173	8.66883	13.925	11.5454	13.673	0.952322	1.68293e-22
SmVG_001313	15.5976	13.3697	1.29489	27.9202	37.782	38.8713	8.97152	11.2973	12.7739	4.26826	8.73092	0.986174	12.6519	14.2875	18.4707	12.3325	8.75213	8.48752	10.3186	13.66	16.4264	0.950956	8.81913e-06
Smp_044560	472.476	403.778	1.33331	342.984	358.756	252.146	93.5453	117.034	187.106	391.551	462.864	0.878503	453.975	431.106	423.776	189.049	190.035	233.044	248.597	239.755	273.11	0.947588	3.11588e-14
Smp_198940	13.5669	9.75554	0.800975	5.41939	10.2144	9.95542	3.82958	5.39601	2.65499	13.4074	16.7419	0.958686	14.1431	15.6064	14.8848	7.88516	6.36137	6.77032	8.59572	7.66585	9.83292	0.936148	2.07862e-11
Smp_060270	43.1702	41.5738	0.632148	23.1172	26.5031	23.3978	13.5231	16.3737	12.0159	34.1886	41.3417	0.963644	27.4904	31.0423	34.6305	12.9412	13.259	13.7058	17.6553	18.7636	19.6262	0.935874	2.07659e-15
SmVG_008390	22.9911	25.2584	0.986921	23.9546	18.4662	19.3304	9.70797	10.2956	13.6441	36.7579	40.718	1.13124	49.3217	48.2014	56.2305	23.582	22.2536	26.4808	28.7141	33.4028	34.5293	0.935786	7.07748e-08
Smp_020120	26.8124	29.2804	0.794181	16.875	19.1882	15.223	8.3074	10.1475	8.73343	20.2057	26.8525	1.05345	21.1333	22.1138	22.4704	9.10048	10.2563	10.5282	12.5855	12.2189	15.9192	0.932786	6.37607e-11
Smp_037120	11.5481	10.2866	0.760048	19.2841	18.8229	18.8308	9.16152	11.6768	9.40124	19.2185	28.9645	0.881989	48.3064	48.4699	52.2801	21.895	20.8265	22.8282	26.3501	26.7737	32.2295	0.930341	1.37188e-14
SmVG_035182	25.8157	30.0966	1.06084	25.8011	30.9983	39.0146	15.3952	18.6917	19.4112	21.8146	31.0174	0.743837	31.5304	31.6181	32.7952	31.0954	21.1238	23.5032	27.9068	31.8564	36.9333	0.929152	5.09156e-07
Smp_199840	16.8316	17.2164	1.77476	8.77445	11.4596	7.25475	4.18485	3.75634	6.91717	14.2652	22.7435	0.847359	25.2546	16.298	27.5034	14.2675	11.6303	18.9388	13.2941	23.2318	22.2362	0.929056	0.000417297
Smp_166550	59.6469	50.7337	0.901703	32.8298	47.482	37.9284	18.5046	21.8443	16.3086	74.5145	83.261	0.994605	69.2874	86.9242	68.6678	31.3982	29.9237	32.7943	46.8666	35.2218	47.6994	0.925631	1.7555e-27
Smp_196130	13.7463	13.5498	0.803846	16.8335	20.674	15.9314	9.40442	11.5097	8.14772	12.2789	15.1039	1.15172	25.496	29.3123	26.3202	10.4395	10.6607	12.1093	16.082	13.4442	16.1867	0.921765	9.4548e-19
Smp_053560	75.839	74.6791	2.07179	36.8552	49.0923	28.6295	8.9786	7.70314	18.404	100.006	69.4354	0.91385	60.6497	96.4712	64.6309	26.793	27.907	29.1494	53.4225	33.2496	33.2132	0.91868	9.63347e-14
Smp_178530	39.2231	36.4082	0.778895	26.1808	35.7839	46.6665	20.5317	21.9591	13.9606	61.6501	91.8686	1.05548	63.8169	74.0615	96.4163	45.0228	37.166	34.7871	45.1959	54.4485	58.4883	0.914706	3.73563e-09
Smp_149950	8.55472	7.68936	0.709724	4.37188	6.45314	6.64441	2.77675	3.60228	2.18994	9.45414	13.5804	0.95632	9.53447	10.2462	9.08695	5.13056	4.4956	4.67634	5.7709	4.91629	7.57628	0.912077	2.15835e-11
Smp_144090	28.9487	28.2738	0.77921	21.7105	27.3328	22.3203	12.5691	14.5551	11.0083	22.1022	23.0421	1.00698	23.9934	31.3602	27.7463	12.1642	11.2656	11.5485	17.1638	14.3622	16.1875	0.912065	8.23767e-23
Smp_038980	20.5863	17.6121	0.871742	25.0973	27.8441	23.8741	13.8941	16.4691	12.9998	13.6177	16.9177	1.14087	21.2233	27.5185	24.477	10.7292	10.0165	10.4553	15.6307	13.1276	15.3137	0.906695	1.06412e-24
Smp_046690	1588.36	2022.07	0.941846	1839.22	1965.95	2033.29	943.422	1140	963.581	1927.92	2282.55	1.02199	2117.81	3274.15	3269.85	1362.43	1309.5	1056.03	1812.25	1765.53	1902.4	0.900858	3.73792e-10
Smp_018930	45.0029	47.3432	0.753599	32.9206	43.2249	32.2498	23.1742	30.2872	17.0766	14.2457	18.1818	1.03358	17.3129	22.401	20.0088	7.08159	8.07648	8.80954	12.8178	10.8758	11.8308	0.899512	1.3376e-07
SmVG_001366	10.3979	14.1536	1.40227	10.1327	7.75856	8.86873	3.36427	3.70314	5.08902	10.8263	13.1217	0.938957	10.0439	10.8624	12.99	5.92086	5.30544	4.93845	6.69047	6.8224	7.21981	0.89687	7.24815e-08
Smp_161990	7.77748	7.19671	0.513665	4.46238	6.38902	5.33124	3.7923	4.96982	2.68643	4.62539	6.3381	0.863727	4.6434	5.24315	6.30322	2.99594	2.7963	2.70286	3.67819	3.78727	4.5428	0.892591	1.0811e-09
Smp_171550	57.6495	41.313	0.568044	22.6655	39.3282	24.0242	15.7718	20.496	11.8697	40.5267	40.2796	0.818327	33.4257	43.8465	31.8827	14.9502	17.2514	16.5346	24.525	16.9483	21.6762	0.888265	9.9367e-11
SmVG_008911:Smp_004280	31.2412	31.2672	0.902683	20.9527	25.5113	23.0155	11.4037	12.8335	10.1863	30.9089	35.2519	0.90306	36.7027	43.7559	40.1611	17.4648	15.3777	17.3214	23.7581	20.5467	24.5272	0.887899	1.43459e-21
SmVG_008911:Smp_124440	31.2412	31.2672	0.902683	20.9527	25.5113	23.0155	11.4037	12.8335	10.1863	30.9089	35.2519	0.90306	36.7027	43.7559	40.1611	17.4648	15.3777	17.3214	23.7581	20.5467	24.5272	0.887899	1.43459e-21
SmVG_018776	5.0624	3.48105	1.10192	8.38544	12.4844	6.91708	5.70069	6.44752	6.88224	6.77564	8.73158	0.851122	16.6116	20.5736	19.4842	19.6492	13.5049	14.5635	20.0283	18.8588	24.6818	0.887019	2.19583e-11
SmVG_023441	87.1532	84.0964	1.05331	57.6324	55.0976	44.5513	22.5685	23.3885	30.2835	293.093	292.014	0.916184	245.732	276.537	253.703	111.578	104.266	119.83	155.179	134.699	141.884	0.883222	7.34225e-17
Smp_073050	48.7413	39.3295	1.16675	26.1323	28.5664	28.2398	10.289	16.4474	13.5766	19.9288	26.761	1.03049	18.1367	17.0191	13.3079	8.48962	8.55161	9.99579	11.0558	7.61125	12.1893	0.882802	6.00992e-07
SmVG_024049	9.299	7.89079	0.738517	8.63998	9.05741	11.4343	12.3589	12.0414	9.00931	5.71533	8.36055	0.805703	6.79094	6.41723	7.10388	10.579	8.11057	8.49512	9.10552	10.314	14.5079	0.880812	1.23899e-05
Smp_141140	44.087	37.1209	0.902613	33.7059	42.9867	39.5166	18.534	23.9533	17.114	30.549	34.3575	0.984788	39.0619	50.8815	47.3582	21.3655	17.7149	18.449	27.7377	24.2408	26.0164	0.880486	4.17328e-21
Smp_011150	33.5793	33.0602	0.783941	18.7778	24.5834	19.9796	10.4209	12.1816	9.38922	26.8903	32.6379	0.871277	26.2785	27.9093	28.0252	11.3574	12.5823	12.7082	15.388	14.6879	17.2195	0.875876	6.47125e-15
Smp_083180	117.861	104.347	1.19445	130.796	130.242	140.258	56.434	68.086	64.6727	82.7447	112.703	1.02897	168.072	161.832	163.525	67.8133	69.7223	79.1887	87.7979	84.1598	98.8066	0.874101	2.92158e-13
Smp_196790	13.7036	14.7968	1.02687	13.2408	12.788	10.285	4.90192	5.57022	6.66689	14.3269	18.1847	0.892844	19.7512	18.0982	19.3198	8.74841	7.96179	9.5951	10.0032	10.2343	12.5181	0.873095	3.31357e-10
Smp_173410	163.511	144.147	0.634909	103.716	133.648	116.669	63.1268	78.6599	49.9279	142.375	171.111	0.876217	154.442	174.381	165.001	65.8603	67.847	70.3012	91.6255	80.7628	97.1066	0.871687	5.26233e-17
Smp_026790	13.2802	10.4726	0.954035	4.52878	7.75849	8.96708	3.54607	4.77373	3.43809	5.63809	7.02772	1.0284	3.51145	3.76757	4.40113	3.4064	1.97063	2.59702	3.22723	3.2479	3.69009	0.871497	2.84283e-05
Smp_049240	45.781	22.5564	2.37535	329.769	323.535	289.479	99.0899	107.449	205.12	22.3137	29.0005	1.70344	366.493	351.147	437.343	210.97	201.039	219.543	228.525	262.73	289.695	0.870335	8.98812e-08
Smp_014400	90.5387	91.426	0.648789	62.7736	83.7672	74.5938	41.0747	49.2474	30.7427	94.3744	102.976	0.939855	102.631	127.264	113.753	52.2957	45.7618	47.9506	68.2943	56.9056	64.2684	0.86932	8.872e-22
Smp_123190	1.22881	1.28762	1.63206	5.46782	2.69927	3.50959	0.769415	0.572462	2.91515	4.11779	5.48117	0.678415	15.6673	13.5962	10.3568	3.66927	4.65958	7.89471	7.8823	5.74822	7.90009	0.869255	0.000284119
Smp_130730	300.881	278.238	1.01581	111.42	179.043	214.116	105.274	130.081	74.3903	290.151	555.633	0.914237	215.285	223.406	319.663	220.282	180.434	141.761	170.934	222.578	285.429	0.866396	9.93278e-05
Smp_002920	23.8007	26.4901	1.78282	14.9451	17.1302	14.331	4.39295	3.81516	7.06801	51.8394	46.5634	0.867486	42.1952	57.8994	44.0075	21.6484	17.9269	19.5139	31.0562	21.8951	25.1257	0.86196	9.21879e-23
SmVG_014785	5.07298	2.87415	0.907449	3.21625	4.75922	2.54322	1.53346	1.74054	1.68292	4.94297	3.60636	0.891738	5.76859	7.26467	5.5573	3.27894	2.21594	2.99633	4.17789	2.98872	2.66941	0.858924	8.43315e-07
SmVG_034760	8.41166	5.69465	0.786414	2.86878	5.36743	5.88643	2.88559	3.48816	2.08906	6.92757	7.96927	0.945018	4.06397	5.25268	5.98657	4.85986	3.55446	3.12165	5.00339	5.34397	5.5493	0.857915	4.21373e-07
SmVG_018978	89.4629	82.0363	1.03366	174.492	143.777	139.565	58.9239	72.868	81.5451	36.0154	49.1863	0.882709	85.8669	79.8738	113.285	39.5033	35.8647	39.8192	43.1335	57.0496	52.8563	0.857447	1.25369e-06
Smp_025750	59.4547	61.0178	0.927652	39.314	45.9681	33.5467	19.8632	23.3743	20.0772	60.5876	58.1591	0.987367	57.6733	73.5622	54.3545	24.418	26.0411	28.9683	41.6415	29.6947	32.9651	0.857021	2.93856e-13
Smp_076990	26.0442	23.6836	0.596291	13.8623	19.1044	17.8054	9.40896	12.618	7.06852	30.815	37.4511	1.00175	27.165	35.6254	31.3022	15.1784	13.2292	13.0559	19.5353	16.2461	20.8601	0.856371	1.04529e-20
Smp_075000	5.62912	3.81015	0.566205	4.88429	7.52645	6.18895	3.61182	4.35629	2.46606	6.34458	7.79385	0.94797	8.90332	11.3938	10.3319	5.63707	4.10426	4.24054	6.16076	5.33453	6.93515	0.856357	8.6433e-12
Smp_201520	10.6952	8.19854	0.93506	4.96228	7.44222	9.4502	3.6752	4.35773	2.90655	13.9427	17.243	0.929909	12.9636	13.5242	13.191	8.64726	6.68484	7.37004	8.75753	7.97348	9.82217	0.852835	7.44103e-10
SmVG_023149	15.735	12.7292	0.867495	12.7912	15.1929	16.6545	6.19868	7.68088	6.79626	21.5437	28.6772	0.850895	27.0637	28.4204	33.3542	17.826	13.8731	14.6491	17.8284	19.2239	22.0544	0.851529	3.87563e-11
SmVG_023335	22.3783	13.6027	0.775117	6.69293	12.4872	12.1318	9.29877	11.0893	7.16371	25.4505	39.9127	0.832895	13.9693	15.9258	17.1296	21.4702	15.5163	14.9211	19.5341	20.5728	24.8832	0.850826	8.45776e-07
Smp_190720	1.67484	1.20088	0.748822	1.1439	1.9991	1.92549	1.36692	1.47411	0.879176	1.30274	1.54385	1.04928	2.0867	1.98749	1.82571	1.7619	1.13663	1.51471	1.73208	1.23435	1.87464	0.849311	4.11723e-06
Smp_166980	22.3015	15.0961	0.605587	11.211	18.0604	12.2856	7.08993	9.11126	5.58172	23.7062	23.381	0.922205	23.1118	31.3775	22.8071	10.1102	10.5111	10.8486	17.0443	11.5997	13.3074	0.848633	1.03895e-13
Smp_194940	13.4402	22.0685	0.977008	32.9638	35.9638	40.6429	22.2663	22.6042	18.1621	11.04	16.3227	0.461056	45.7331	45.2909	42.1559	23.3207	21.7005	23.9657	26.5946	23.9657	27.4919	0.847832	1.55221e-10
Smp_103920	3.61021	5.00103	0.823029	3.01639	3.62287	3.12707	1.56439	1.92038	1.48654	9.50743	9.9467	0.876395	11.4355	11.8352	11.5788	5.41342	5.31718	5.38487	6.41477	5.88959	6.69017	0.842	3.28295e-11
SmVG_008258	15.4451	12.3864	1.64339	18.9675	20.9032	16.3285	7.92931	10.5849	13.9735	3.81248	4.95274	1.0885	9.22607	7.59474	9.8595	9.96229	5.86332	7.93867	8.78951	9.51139	10.7567	0.841173	1.07068e-07
Smp_058620	69.3061	65.3852	0.86102	38.6476	50.2717	38.1082	17.7823	23.4538	19.081	53.8055	57.8716	0.865997	44.2438	56.8353	52.6899	24.3085	20.8523	20.9671	30.6857	27.2881	29.4041	0.840761	1.21409e-18
Smp_173920	46.268	38.8435	0.632413	79.0021	143.235	209.802	95.8401	116.996	54.7928	69.0207	120.984	0.72734	209.431	237.609	307.598	202.087	150.854	145.263	171.986	214.006	242.774	0.840454	5.85111e-07
Smp_176910	30.9158	30.0695	1.02583	19.5315	19.0223	14.7107	7.79043	8.37384	9.45468	21.014	21.6607	0.859409	17.9722	18.9571	20.5854	8.61559	7.22422	8.5394	10.4289	10.6738	9.77666	0.836515	1.84572e-10
Smp_203970	125.882	118.132	0.688504	67.6811	94.8055	69.0339	37.0224	45.0568	31.1387	81.9218	83.9086	0.742622	70.443	91.7103	85.5534	34.2887	35.2293	31.842	48.1016	41.405	45.2517	0.834218	2.71143e-15
SmVG_018998	14.6662	15.8719	0.645578	5.72833	9.5838	6.9506	4.25488	5.94102	2.97657	13.258	11.6669	0.861937	10.4004	13.9238	11.9629	5.61607	4.99871	5.13559	7.94162	6.39803	6.86956	0.833028	2.24276e-11
Smp_076710	25.4898	16.0043	1.21363	22.4391	28.4914	25.1967	9.74497	13.4218	11.3465	14.5387	18.0895	0.872731	24.2048	26.3084	23.8176	12.8309	10.5554	11.6852	14.7403	13.2242	17.8138	0.832092	8.11342e-10
Smp_101650	9.98453	8.70953	0.820154	7.20727	9.40058	6.46079	4.01131	5.61513	4.19677	10.2279	11.151	0.796988	11.839	13.8447	14.8786	7.81431	7.81506	6.65429	9.09564	8.61541	9.01072	0.831591	9.7024e-07
SmVG_011745	11.5851	10.6532	1.44476	7.77976	10.6711	11.771	4.08103	5.74483	5.69105	10.4232	13.0746	1.5422	10.5306	11.4934	11.8014	10.1196	7.5102	7.71119	8.87226	8.98318	12.0107	0.831239	4.67334e-06
Smp_118570	175.858	132.418	0.920538	37.5685	65.4375	69.0593	41.5319	49.1937	32.4892	106.742	142.791	0.941688	47.9601	52.2296	60.0126	51.2207	36.833	35.8642	49.702	47.9611	59.6274	0.829871	1.1667e-09
Smp_103540	175.08	158.441	0.494173	97.1032	128.984	101.89	70.1318	90.9093	48.061	88.0514	96.2577	0.885208	83.5412	98.8994	86.5857	38.3737	39.2311	39.8108	53.8486	44.4157	51.9321	0.822982	5.243e-21
Smp_067800	3541.8	3792.39	1.09356	2264.07	2136.2	1938.09	804.659	951.034	1092.62	1845.83	1996.03	0.848622	1634.03	1643.43	1555.92	656.142	665.996	763.608	887.778	777.275	864.032	0.822256	9.86476e-11
Smp_050830	29.8541	31.375	0.512044	12.3731	18.9805	12.7782	9.35304	10.8474	6.26824	43.8547	40.1648	0.769699	30.3489	43.9917	28.1712	15.5352	13.9488	14.7585	24.5258	14.9331	21.4343	0.82215	8.4506e-18
Smp_000380	29.3367	14.9663	1.16589	5.2549	10.3917	14.4731	8.45838	8.43335	4.61246	17.3546	29.4415	0.723619	13.7468	13.7384	9.6412	16.8012	8.43388	11.6168	12.1701	8.90962	17.286	0.821577	0.00102422
SmVG_002569	4.52344	3.75556	1.35426	6.04753	10.4681	10.1821	3.02861	4.98836	3.61911	4.65243	7.10029	0.74953	6.64347	10.1865	12.7135	9.40754	6.18032	5.8887	7.49436	8.23399	10.8107	0.821406	7.52458e-05
Smp_083780	11.398	9.43946	0.539849	6.51214	9.875	10.4374	5.3339	6.24442	3.18667	11.672	13.8455	0.885588	12.8699	15.2811	13.6439	7.15749	5.6846	6.15401	8.4486	7.08057	8.85102	0.821256	4.12312e-19
SmVG_002610:Smp_213920	20.5351	16.3876	0.717089	12.0029	17.9463	14.5322	7.49466	9.73817	6.15957	21.8392	25.4287	0.855928	21.7314	26.9408	22.1515	13.4055	10.0379	10.7208	15.1704	11.8389	15.5495	0.813755	1.15519e-15
SmVG_002610:Smp_213930	20.5351	16.3876	0.717089	12.0029	17.9463	14.5322	7.49466	9.73817	6.15957	21.8392	25.4287	0.855928	21.7314	26.9408	22.1515	13.4055	10.0379	10.7208	15.1704	11.8389	15.5495	0.813755	1.15519e-15
Smp_072460	15.7684	19.6138	0.818612	6.56627	9.69494	6.77612	3.46236	4.98816	3.59582	7.00327	7.17536	0.848769	5.81887	6.63454	5.30424	2.70355	3.21315	3.04585	3.86329	2.972	3.58127	0.811949	2.46263e-05
Smp_091190	33.0582	36.7071	0.614242	18.6797	25.1569	23.8129	14.3178	16.3795	9.14803	91.1115	103.855	0.974055	90.069	108.701	93.2864	45.9281	42.3207	42.7018	59.1309	47.6421	58.5152	0.808802	6.49405e-20
Smp_019950	155.215	169.453	0.3978	111.882	131.748	146.234	90.1671	104.082	60.8556	151.076	173.415	0.753341	168.89	178.188	151.039	78.3865	77.3283	88.0774	104.594	85.4449	111.362	0.808288	4.1947e-16
Smp_164060	1.76751	1.67154	0.868765	2.27183	2.91112	2.5793	1.33359	1.42702	1.07618	1.33424	1.32483	0.816463	2.53429	3.57705	2.367	1.42342	1.19286	1.29154	2.05986	1.2549	1.68208	0.806474	4.41893e-09
Smp_163460	82.7039	82.733	0.715526	69.7832	84.0738	69.2546	37.7159	43.5785	33.7814	75.9074	75.3949	0.769803	93.1219	113.367	98.2613	44.7093	43.8657	43.9283	62.0325	50.2744	54.8664	0.804599	3.30664e-18
Smp_181090	14.9082	10.7704	0.997422	8.6048	13.8455	10.725	4.68364	5.68596	4.3933	11.583	13.9198	0.877985	11.2874	13.7705	14.3767	7.72635	6.12368	5.60435	7.74281	7.7734	8.86857	0.803632	7.96904e-09
Smp_043120	55.1645	50.4679	0.780936	36.0357	33.2867	26.4632	16.0645	18.3498	18.5371	47.7931	46.9891	0.850968	40.6379	43.3033	37.3263	17.5355	17.2706	20.3131	24.6215	20.1771	22.6368	0.801476	7.55078e-12
SmVG_016524	4.90782	5.14529	0.796641	3.87875	6.31498	8.42041	3.6946	4.08505	1.95904	3.53097	7.18274	0.792448	6.04817	6.96787	9.4221	5.7265	4.17985	2.96688	3.90534	4.92683	6.32117	0.801331	0.00265774
Smp_067490	77.5957	92.2243	0.796517	63.3455	69.7392	49.0614	30.9827	33.9319	30.8967	86.0373	73.7584	0.72066	87.0574	110.052	76.6122	37.8689	36.819	41.2614	60.2174	39.4907	51.1434	0.801043	2.27747e-16
Smp_140530	20.8898	16.4609	0.421798	12.9912	20.0791	16.5343	9.74237	12.3139	6.55688	15.0553	16.3522	0.786268	16.5004	20.1014	14.315	8.5231	8.26673	8.50517	11.804	8.18601	11.8226	0.800435	3.38998e-12
SmVG_032355	11.0337	10.393	1.37092	8.61935	6.71591	7.49649	2.94717	3.6588	5.23061	19.6436	20.8555	0.785947	19.5423	17.5889	17.2769	10.231	9.75876	11.925	13.9569	12.2538	13.2713	0.797988	2.8456e-06
Smp_126850	20.8872	16.2703	0.413039	11.0907	17.918	16.6815	9.7488	11.2015	5.74096	20.6166	24.4286	0.796295	20.64	26.4639	24.2622	12.7857	11.1361	10.1041	14.855	12.9626	15.82	0.797189	3.09865e-14
SmVG_014945:Smp_213130	257.288	263.407	0.894755	272.502	239.139	225.375	109.184	125.158	138.773	100.056	127.139	0.788689	154.973	135.726	162.657	67.6723	61.6308	75.0165	75.548	85.443	89.9907	0.796768	1.33365e-07
SmVG_014945:Smp_213140	257.288	263.407	0.894755	272.502	239.139	225.375	109.184	125.158	138.773	100.056	127.139	0.788689	154.973	135.726	162.657	67.6723	61.6308	75.0165	75.548	85.443	89.9907	0.796768	1.33365e-07
Smp_158650	58.4762	43.2011	1.06359	92.8654	91.6426	80.2646	36.0747	41.9465	48.5361	24.5048	28.8809	0.850174	65.7368	66.062	68.8259	32.558	27.4964	32.7502	37.4654	37.5089	39.9291	0.791864	1.85072e-09
Smp_090230	1968.09	1790.67	0.717057	1529.73	1456.13	1397.56	699.715	828.698	751.448	929.347	1244.14	0.74658	1006.7	990.282	1046.42	421.011	452.862	459.499	518.756	508.409	606.5	0.79115	6.27587e-09
Smp_040560	11.9475	10.1553	0.767927	9.49936	15.7683	13.7145	6.43532	9.86951	4.43473	10.4396	13.538	0.885984	17.6681	22.7128	22.3484	10.3262	8.66446	8.20942	12.1012	11.0908	13.2843	0.788455	7.67329e-12
Smp_118750	57.8457	57.5525	0.680382	66.5847	75.6602	69.806	42.4619	54.1013	36.3193	76.4684	110.895	0.840967	90.1761	86.6953	70.6437	40.7445	42.062	46.4758	50.3297	39.2962	65.3306	0.78668	2.52027e-07
Smp_027850	53.8793	46.5351	0.644443	30.5238	40.7756	33.974	18.0207	22.6413	15.3283	39.9369	44.3056	0.800672	35.8942	43.1671	37.3312	19.9634	16.9435	17.2507	23.6644	19.5785	24.023	0.783713	1.15514e-16
Smp_007510	38.6949	36.7469	0.385752	20.7	32.8426	26.3704	18.8995	21.7592	10.3432	35.3315	39.0046	0.801173	35.7054	43.8036	35.7408	19.0146	18.3481	17.0665	23.9642	18.5317	24.015	0.782953	1.71474e-17
SmVG_016018:Smp_027290	5.91894	6.79774	1.32637	9.93883	11.7233	10.6965	4.31144	5.23293	5.42545	5.16666	7.01425	1.25875	15.7413	14.6932	16.6155	8.06164	7.07058	8.09141	8.57278	9.31102	10.2956	0.779688	4.39063e-10
SmVG_016018:Smp_136950	5.91894	6.79774	1.32637	9.93883	11.7233	10.6965	4.31144	5.23293	5.42545	5.16666	7.01425	1.25875	15.7413	14.6932	16.6155	8.06164	7.07058	8.09141	8.57278	9.31102	10.2956	0.779688	4.39063e-10
SmVG_016018:Smp_194950	5.91894	6.79774	1.32637	9.93883	11.7233	10.6965	4.31144	5.23293	5.42545	5.16666	7.01425	1.25875	15.7413	14.6932	16.6155	8.06164	7.07058	8.09141	8.57278	9.31102	10.2956	0.779688	4.39063e-10
Smp_135940	7.11895	5.85845	1.22135	6.37917	6.67859	6.16611	2.236	2.68001	3.00049	6.41961	7.52758	0.844914	8.10809	9.19887	9.48113	4.47376	3.4534	3.77571	5.01571	4.83435	5.23834	0.779292	3.49141e-11
SmVG_001935:Smp_210830	49.764	46.7444	0.657625	30.4551	45.478	40.0687	19.1033	24.7211	15.0305	34.079	37.9277	0.778625	36.2002	41.9766	40.1445	17.9701	17.7935	17.0094	22.6746	20.2941	23.5751	0.778327	1.10625e-16
SmVG_001935:Smp_210840	49.764	46.7444	0.657625	30.4551	45.478	40.0687	19.1033	24.7211	15.0305	34.079	37.9277	0.778625	36.2002	41.9766	40.1445	17.9701	17.7935	17.0094	22.6746	20.2941	23.5751	0.778327	1.10625e-16
SmVG_020309	33.1002	26.1622	1.15355	14.9504	21.9339	25.754	16.177	18.1102	16.2225	34.3964	47.3129	0.85341	27.4782	27.7481	41.8475	33.3308	26.758	23.3312	31.4185	32.9171	36.4804	0.774614	1.16416e-05
Smp_075290	10.4914	7.79602	0.756815	6.48809	10.1623	9.43527	4.93183	6.1062	3.26764	10.216	12.8597	0.992536	12.677	15.7855	14.5101	8.06202	6.33458	6.21996	9.01327	7.70585	9.25048	0.772656	7.23653e-16
Smp_154230	45.4419	41.146	0.823423	25.6351	36.4396	26.7681	13.5773	17.6642	12.9153	34.7921	38.7291	0.826513	34.3182	42.9308	34.5474	17.32	17.0322	16.6997	23.7859	18.3104	22.9192	0.771076	4.63954e-21
SmVG_024824:Smp_011600	3.96118	3.5598	0.61021	2.04833	3.82887	3.2841	1.95001	2.44848	1.22167	6.43763	7.06045	0.870987	7.14455	9.26007	7.69314	4.82655	3.65987	3.74421	5.325	4.11673	5.24432	0.768458	2.27937e-14
SmVG_024824:Smp_128400.1	3.96118	3.5598	0.61021	2.04833	3.82887	3.2841	1.95001	2.44848	1.22167	6.43763	7.06045	0.870987	7.14455	9.26007	7.69314	4.82655	3.65987	3.74421	5.325	4.11673	5.24432	0.768458	2.27937e-14
SmVG_024824:Smp_128400.2	3.96118	3.5598	0.61021	2.04833	3.82887	3.2841	1.95001	2.44848	1.22167	6.43763	7.06045	0.870987	7.14455	9.26007	7.69314	4.82655	3.65987	3.74421	5.325	4.11673	5.24432	0.768458	2.27937e-14
Smp_093850	28.9617	24.0271	0.861534	17.0858	21.3569	20.0555	9.77209	11.6964	8.79109	22.2944	28.1127	0.857637	24.677	25.9075	27.2871	12.1051	11.624	12.0868	14.5101	14.582	16.143	0.763551	4.10834e-11
SmVG_001700	12.6646	11.6536	0.867113	14.8274	17.9573	18.4703	8.41475	10.7971	7.43408	12.2159	15.031	0.788354	22.4887	25.2389	25.3221	12.6281	12.0455	10.8779	13.9849	13.3484	16.073	0.76209	8.12255e-12
Smp_035150	69.1818	59.6756	0.585748	46.6373	58.7436	51.1807	24.9913	30.6871	24.0191	77.9504	85.7986	0.733075	78.5021	92.6272	75.3016	43.6369	38.3496	37.4071	50.9268	38.588	50.1443	0.761035	2.931e-15
Smp_160870	26.3409	19.2186	0.421626	15.4592	22.0688	19.0547	11.5866	14.5871	7.36206	19.3349	20.8865	0.777129	21.1813	25.3626	20.7086	9.82348	9.62737	9.80994	13.4859	10.2358	12.8975	0.760274	2.46112e-14
Smp_064830	233.2	191.977	0.779262	131.387	195.302	225.59	90.2265	106.399	68.4058	201.818	256.356	0.774321	196.518	244.391	264.485	143.075	110.438	98.5172	138.305	145.769	160.801	0.759907	1.35817e-08
Smp_071470	141.862	112.514	0.739758	69.9347	102.977	103.788	42.1947	55.9421	33.6329	111.502	139.318	0.791633	95.3467	116.286	118.803	60.2227	50.1554	44.9931	63.3346	59.7111	70.0005	0.758332	1.61553e-11
Smp_061580	14.585	11.7432	0.950097	23.4303	22.0465	21.573	9.79966	10.6998	11.3104	11.8824	15.3357	0.706471	27.074	27.5423	31.5972	13.674	12.9076	12.7219	14.9078	16.0756	16.9433	0.758247	6.33092e-09
Smp_160550	12.7604	11.2168	0.981633	11.6603	16.525	21.5011	7.31543	10.6501	6.71568	4.12936	4.4092	0.774549	5.24579	6.36859	6.33115	3.53596	3.14697	2.93732	3.75366	3.68206	4.24142	0.757874	1.19513e-08
Smp_199470	39.9939	26.8843	0.715114	15.6728	20.844	19.2717	12.113	15.0238	10.7489	31.3173	44.5069	0.792964	23.226	24.6292	22.7271	20.097	13.423	15.4544	18.1335	16.3204	22.9697	0.757399	1.20812e-08
SmVG_011954	20.8054	19.48	0.776478	7.16931	10.8456	10.9576	6.08795	7.5639	4.88685	10.8389	14.3164	0.75108	7.98298	8.43849	9.79408	5.72598	4.76491	4.76232	5.75386	6.25941	7.17038	0.75368	4.86151e-07
Smp_078610	43.5542	38.2881	0.443559	21.3126	33.6102	30.9557	17.7752	21.6339	10.9884	42.5353	48.7181	0.78707	35.6737	47.2427	43.4229	23.3745	19.2063	17.7952	26.6569	23.5128	28.2281	0.753121	1.30833e-13
Smp_137380	13.3724	11.3746	0.732544	7.97106	11.1086	9.66331	5.06005	6.56917	4.07246	10.3262	12.0696	0.778118	10.2864	12.8912	11.7026	6.00549	5.23199	5.05864	7.1978	6.19116	7.19852	0.752883	2.07637e-11
Smp_132030	8.06758	7.14283	0.804741	13.3732	13.7355	12.0135	5.92072	7.39246	6.82166	5.00127	6.80193	0.637298	13.2795	12.5368	14.6428	6.68404	6.17078	6.76887	7.18149	7.8594	8.73252	0.750147	2.9709e-08
SmVG_023208	7.26713	7.20317	0.850572	4.34219	4.96982	6.86529	1.98814	3.02513	1.87949	15.8624	23.6084	0.773458	13.5763	15.5847	18.0423	9.36024	7.07916	5.91411	8.07825	8.35508	10.3159	0.749738	7.9895e-06
Smp_080180	20.5616	20.771	0.426194	12.1069	17.3421	13.2072	7.83412	9.81682	5.83139	27.9398	27.8655	0.754911	26.2451	33.0468	27.2596	13.1218	13.5256	12.8785	18.4557	14.3517	17.6484	0.74812	1.17413e-17
Smp_073080	97.7373	91.8738	0.841192	105.727	120.204	90.9469	59.934	80.894	54.3092	59.2287	81.8501	0.945082	100.506	110.784	107.782	53.3319	46.4342	50.2589	61.9175	59.1639	68.9012	0.745115	4.37418e-10
Smp_103340	8.11058	5.39852	0.564704	5.15305	7.79367	5.90373	3.80778	4.59437	2.62265	4.75072	5.88441	0.844906	6.99757	7.39102	7.54418	3.12572	3.76379	3.46659	4.19959	4.0174	4.42263	0.742332	5.80402e-07
Smp_119310	210.858	224.558	0.344605	133.527	166.723	140.69	95.9025	113.489	65.6079	204.059	179.767	0.689563	177.062	225.778	178.704	87.0618	84.8575	83.9935	122.755	92.8924	108.029	0.741637	3.36061e-17
Smp_030290	146.043	139.757	0.863269	181.223	180.867	161.701	82.5792	102.416	94.2844	117.676	161.848	0.827057	216.539	214.114	220.329	103.125	100.804	104.804	117.981	116.688	135.311	0.740621	1.18688e-09
Smp_174800	45.319	43.7861	0.716064	23.3868	30.0195	20.0008	14.1198	14.3537	11.1768	50.0026	46.2333	0.771678	35.8506	50.4148	39.1198	19.4873	17.4577	16.5222	26.9487	19.3836	21.9803	0.739807	2.19869e-17
Smp_054240	378.038	332.329	0.800891	276.161	264.578	245.971	114.922	139.212	136.565	171.558	209.427	0.729115	175.201	171.579	173.082	75.5501	75.7852	83.7611	93.8675	89.2878	100.784	0.737724	5.04334e-09
Smp_091800	25.4595	24.6023	0.912434	31.694	34.6818	28.4655	15.3249	19.8877	14.3368	31.9608	40.1867	0.93975	60.0681	68.1946	64.2516	28.6352	28.7551	27.3397	36.393	31.6596	37.326	0.737266	2.03952e-12
SmVG_002453:Smp_008340	15.3293	12.1651	0.586498	7.47791	11.4461	11.6491	5.4953	7.1891	3.78577	12.9602	14.5371	0.851994	14.5526	15.1964	12.8481	6.92764	6.64445	7.14724	8.42047	6.73881	8.76124	0.737175	3.41821e-13
SmVG_002453:Smp_008360	15.3293	12.1651	0.586498	7.47791	11.4461	11.6491	5.4953	7.1891	3.78577	12.9602	14.5371	0.851994	14.5526	15.1964	12.8481	6.92764	6.64445	7.14724	8.42047	6.73881	8.76124	0.737175	3.41821e-13
Smp_108390	14.6197	12.6471	1.12678	11.8942	13.2953	11.8429	4.22302	5.19414	5.51111	8.79435	9.45118	0.632272	11.4456	12.3814	12.8562	5.1741	4.60328	4.79423	5.96646	5.81711	5.90827	0.736395	4.05265e-10
SmVG_011243:Smp_210180	129.371	136.501	0.699189	70.4314	93.1684	75.9889	45.6846	56.5917	35.3048	98.9298	125.086	0.852964	100.48	108.717	106.467	48.4602	52.9317	48.7992	60.6078	54.8086	65.2951	0.735868	3.3331e-11
SmVG_011243:Smp_210190	129.371	136.501	0.699189	70.4314	93.1684	75.9889	45.6846	56.5917	35.3048	98.9298	125.086	0.852964	100.48	108.717	106.467	48.4602	52.9317	48.7992	60.6078	54.8086	65.2951	0.735868	3.3331e-11
Smp_153920	52.2206	60.0101	0.906567	22.0802	31.465	23.5168	12.9873	13.2589	11.2723	55.5049	40.5507	0.752518	33.7531	49.7819	27.632	16.8008	16.5969	16.5823	28.0733	14.8587	18.7697	0.735763	7.73094e-09
SmVG_035355	5.04052	4.12003	1.07028	20.9558	33.9755	38.5101	13.2821	14.2541	13.6685	4.96826	5.80627	0.855839	27.0331	31.2894	34.314	21.5013	16.031	15.9904	23.7135	20.8067	22.0873	0.735578	1.00893e-09
Smp_032150	107.602	95.171	0.734347	64.1141	73.986	46.4017	35.2301	38.0429	33.2217	128.66	116.952	0.725936	97.1493	129.396	104.847	52.5797	50.8266	49.2935	73.7979	58.3644	62.5002	0.733595	1.32419e-16
Smp_057720	347.018	303.706	0.827567	171.137	219.687	176.493	119.129	152.728	110.035	218.461	240.118	0.751243	166.367	206.401	195.543	114.515	112.749	101.67	141.405	121.39	134.997	0.732873	1.26095e-13
Smp_153890	40.9923	36.2146	0.610278	27.6126	42.9831	39.0216	23.4644	29.6771	15.2774	45.652	51.115	0.857895	63.7305	73.0083	71.9797	37.8741	36.2426	35.0162	45.4335	41.7655	48.2428	0.732094	5.27631e-15
Smp_050920	6.50226	6.015	0.417241	2.44157	4.30376	3.75616	2.4341	2.97318	1.28519	6.62435	8.93124	0.741078	5.20394	6.25978	5.56332	3.73505	2.80968	2.77065	3.871	3.33531	4.53614	0.73185	2.11606e-11
SmVG_023513	5.54547	4.14476	1.01722	26.3813	41.1959	46.0317	20.8982	24.3738	14.2476	3.88658	8.22503	1.17112	52.4406	50.4251	66.9445	42.2789	34.1118	28.1433	31.1009	38.8294	50.6127	0.731683	0.000141229
SmVG_032275	25.033	25.0033	0.820816	18.4214	23.4966	16.282	8.99341	11.8993	10.7906	15.6154	19.9426	0.671929	20.7887	21.6144	23.7444	11.042	11.4714	10.8445	13.128	12.9739	14.4621	0.729689	1.05654e-06
Smp_045040	103.941	101.97	0.647041	65.3378	89.7431	103.896	42.3948	59.8862	29.9108	60.4279	80.4874	0.72241	67.5413	74.5616	76.045	40.9461	32.4696	30.4599	39.0764	36.8284	46.9446	0.729499	4.29118e-10
Smp_041730	17.1283	15.9332	0.757378	12.0057	16.6539	13.6682	7.1842	9.33787	5.73333	15.5187	18.5204	0.806249	17.8727	21.9151	20.6015	10.451	8.73398	8.35339	11.8049	10.4765	12.4246	0.729277	2.24657e-15
Smp_021830	12.2714	9.18946	0.499332	6.62655	11.0693	10.0205	5.47103	6.86519	3.15265	9.12292	11.1681	0.868747	11.8773	13.4965	11.6783	6.15472	5.34526	5.53557	7.31338	5.94451	7.36169	0.727749	2.85046e-12
SmVG_028761	20.5632	14.0732	0.67342	11.1032	14.6572	13.9498	6.39883	7.75191	5.65854	13.7787	17.4834	0.804095	11.6566	13.6006	13.8823	8.17942	5.64429	5.76669	7.55778	7.42253	8.78709	0.727595	8.77701e-09
Smp_174200	3.14405	1.83898	0.585073	5.20841	9.02328	8.73119	4.34465	5.39479	2.5309	6.21351	9.06981	0.850612	19.2083	22.627	22.7097	12.8142	10.0799	9.09697	12.3482	11.5834	15.5587	0.723275	2.42155e-09
Smp_141820	44.033	43.4045	0.870266	46.026	53.314	48.1902	29.198	36.9453	25.2882	58.886	80.6897	0.86007	91.6452	113.033	110.042	58.1201	54.0192	51.0526	72.007	64.8057	74.0666	0.722448	1.29559e-12
Smp_087940	746.44	859.36	0.738584	500.426	635.465	452.45	291.859	364.749	257.424	551.112	449.021	0.729013	524.822	696.962	473.814	266.271	248.899	260.373	392.584	257.469	302.913	0.721608	3.40627e-13
SmVG_001960	135.061	126.503	0.491717	113.974	131.509	121.656	62.177	78.4919	53.3705	87.7469	116.201	0.525317	114.489	115.512	127.167	50.5042	55.0242	51.3937	60.9258	63.5244	74.9202	0.720416	2.28431e-05
SmVG_008093	10.5654	8.26855	0.889752	6.78075	11.1827	13.3816	4.82467	5.61692	3.27786	9.89056	11.9109	0.780107	11.1971	14.0416	14.0028	8.19838	7.06926	5.94178	8.23792	7.78763	9.04195	0.719151	3.24109e-07
Smp_000370	5.81458	5.91064	0.945291	8.52634	8.52834	6.41548	3.42741	4.68392	4.01065	3.98679	4.86376	0.937985	8.47733	10.1162	9.987	4.31927	3.97862	4.11893	5.32147	4.95234	5.12898	0.712982	4.70902e-08
Smp_060900	47.22	39.4709	0.356151	26.6927	39.2785	33.0847	20.6038	24.0419	12.9943	43.2792	48.6705	0.719019	38.6482	51.2234	42.9	24.3262	20.0061	18.2429	27.8264	21.892	28.5094	0.711947	2.53415e-14
SmVG_025298	22.5606	19.3254	0.70567	6.00768	7.86081	7.95954	6.72941	7.56483	5.25248	14.98	18.7528	0.648917	7.30279	3.35885	8.27638	7.56916	6.933	7.27105	8.56204	8.77265	10.0012	0.711037	2.89003e-07
Smp_067540	110.869	109.133	0.740068	93.524	106.84	97.5916	53.8825	67.2385	47.9789	199.776	265.491	0.807836	282.505	300.217	274.454	148.315	144.036	138.586	167.017	145.214	188.56	0.710112	5.96755e-12
Smp_007900	980.036	916.041	0.603864	902.843	852.482	837.647	477.126	577.862	462.484	499.007	623.604	0.68258	649.718	616.057	690.886	313.338	313.466	317.806	341.057	370.599	403.644	0.709178	3.06297e-07
SmVG_028704:Smp_058720	26.1507	19.311	0.884319	38.864	45.5746	49.7153	22.2124	29.6879	19.3478	17.2778	21.5616	0.973097	37.0703	42.0965	47.6005	24.836	20.3215	18.0613	23.6309	24.9244	28.2802	0.708211	1.51239e-08
SmVG_028704:Smp_153730	26.1507	19.311	0.884319	38.864	45.5746	49.7153	22.2124	29.6879	19.3478	17.2778	21.5616	0.973097	37.0703	42.0965	47.6005	24.836	20.3215	18.0613	23.6309	24.9244	28.2802	0.708211	1.51239e-08
SmVG_030267:Smp_054220	38.6578	40.2435	0.767329	76.272	72.011	55.4566	28.597	33.9027	37.9148	25.023	30.6022	0.955885	67.3899	74.7608	72.1522	33.7037	30.8606	32.307	40.9914	37.2199	40.3136	0.70821	1.9351e-11
SmVG_030267:Smp_054230	38.6578	40.2435	0.767329	76.272	72.011	55.4566	28.597	33.9027	37.9148	25.023	30.6022	0.955885	67.3899	74.7608	72.1522	33.7037	30.8606	32.307	40.9914	37.2199	40.3136	0.70821	1.9351e-11
Smp_074410	22.092	20.4085	1.31037	17.6855	17.4646	14.0675	4.43572	5.29469	9.15062	23.2811	24.0258	0.687935	23.7569	26.1151	18.4298	12.7834	9.34448	11.6179	14.4098	9.76382	13.0679	0.707941	3.98966e-06
Smp_028060	36.77	31.9443	0.684856	23.2817	30.4114	26.3332	13.7817	17.3152	11.3085	26.1408	34.7051	0.75775	31.2822	32.9656	31.3093	14.9588	15.9063	14.8449	18.0985	15.9197	20.6521	0.707701	6.44503e-10
Smp_052800	5.23835	4.39116	0.658388	3.9456	6.51879	5.52904	2.8196	3.65792	1.71948	4.78298	6.25776	0.766542	6.89454	9.51224	8.47214	4.27058	3.58552	3.02779	4.69956	3.90643	5.06023	0.706871	7.42365e-12
Smp_191250	17.58	12.1954	1.00427	3.34293	6.89879	7.38771	6.03247	6.61664	4.37285	12.2682	18.0467	0.741068	6.24955	5.90271	6.98318	13.4489	7.08642	9.42072	9.2416	10.0466	13.3957	0.705724	0.000326452
Smp_051920	8.327	5.77556	1.32095	9.15793	12.4184	9.01237	4.40504	5.34168	4.63757	4.34703	4.20454	0.725489	9.17122	10.8164	7.02767	4.11991	4.30843	4.49392	6.09973	3.68952	4.70254	0.704811	1.03171e-07
Smp_202620	11.1149	10.1455	1.14095	6.86015	19.8038	10.8727	8.24533	10.9264	7.52642	6.39264	9.41186	1.04475	12.9556	12.5222	16.2762	13.8275	9.76931	9.95303	9.69965	11.3937	15.3773	0.703763	0.000808437
Smp_001430	56.9817	54.1147	1.00443	81.5473	98.3479	110.76	41.8482	47.7506	41.0911	34.7776	45.0033	0.459102	94.6991	106.367	121.821	61.5962	52.194	45.6689	59.1245	64.473	66.8274	0.702299	5.28341e-08
Smp_064500	34.7856	36.9046	0.682706	21.1185	22.7188	17.7997	10.6576	14.0912	10.8426	41.6774	44.684	0.712899	33.1882	40.2578	32.3527	16.81	17.1455	16.3037	22.3039	17.1091	21.72	0.701015	2.05698e-11
Smp_151020	9.99942	8.81171	0.693784	11.2113	16.1804	12.1227	6.16833	8.23679	5.43936	8.88052	11.978	0.61659	20.0785	19.6374	19.4353	10.1759	9.49549	10.1019	11.3275	10.3	14.5247	0.699507	7.37971e-06
Smp_191670	8.27203	6.12935	0.937874	5.4815	8.32016	9.8358	4.52341	5.35863	3.3943	6.51775	9.08025	0.85939	7.57333	8.63126	11.8916	8.84704	5.46956	4.87748	6.04335	8.85022	8.00626	0.699423	0.00184292
Smp_068000	699.572	693.822	0.726251	431.286	451.745	408.743	235.938	294.912	236.028	779.215	856.226	0.704702	649.021	760.264	698.971	369.423	376.907	345.637	451.566	416	454.353	0.6988	1.13634e-10
Smp_038540	35.3335	30.3442	0.760618	18.2779	25.5412	25.0064	12.9883	15.3243	9.68019	62.5782	67.1815	0.731158	46.1546	67.1669	56.0462	31.651	28.4789	23.6448	38.6498	31.4154	36.4848	0.697462	1.65564e-12
Smp_041650	2237.1	1933.42	0.709776	1669.77	1440.47	1403.12	758.462	966.037	882.101	769.081	996.087	0.622105	729.182	712.791	772.754	375.03	353.15	373.987	414.217	427.744	472.234	0.696817	8.23189e-07
Smp_124940	32.5462	29.2125	0.972535	30.6143	38.3513	31.4399	17.289	23.5236	16.4848	21.6578	23.134	0.920137	34.507	43.846	43.4966	19.5237	20.8899	17.6339	25.0971	24.1628	24.0355	0.696492	7.05569e-07
Smp_102330	10.9653	11.084	0.597236	7.049	9.47789	6.22584	4.38418	4.85832	3.47784	24.436	22.7954	0.754952	23.8499	31.0523	25.2121	12.7123	11.9915	11.4671	17.1484	13.0656	14.7375	0.696	8.86633e-15
Smp_021870	173.198	184.789	0.67535	71.3288	100.188	70.0486	44.6044	55.1833	33.6048	170.578	155.659	0.723644	113.212	148.731	108.82	58.7704	58.6455	53.2129	82.0977	55.1333	66.4585	0.694377	5.09421e-15
SmVG_001273	19.6041	14.6646	0.474432	9.11635	17.8634	18.235	11.4262	12.935	5.90808	14.5485	21.5975	0.69926	19.394	18.5489	21.2853	17.2359	12.4117	12.2384	13.5481	14.0376	16.9193	0.693876	5.29736e-05
Smp_006850	87.3856	80.0684	0.668664	44.6884	53.3354	42.6345	22.8907	29.7673	21.2016	62.1891	69.7706	0.719204	51.2415	55.362	53.6062	24.7567	25.0672	23.8124	30.0794	26.4157	29.9013	0.693336	3.07722e-09
Smp_063350	1479.28	1333.38	0.547485	1243.05	1161.25	1063.72	635.195	816.742	632.335	699.713	878.452	0.633122	818.084	771.175	767.461	374.011	389.018	392.852	425.045	401.113	494.766	0.69318	6.12076e-08
Smp_139510	31.3652	28.2724	0.479996	16.4598	25.4452	23.8563	14.1975	16.0926	8.22216	31.8657	35.659	0.732473	28.2582	37.0986	35.8676	19.0511	14.556	13.641	20.3105	18.7769	20.3236	0.692649	1.3639e-11
Smp_199640	34.1387	30.6368	0.594376	34.7463	42.9326	34.3153	22.3561	28.1326	18.5113	61.1277	63.1823	0.719792	84.0254	108.339	95.3133	54.2604	51.3934	46.0155	66.0542	53.0692	61.8151	0.691365	5.56415e-12
SmVG_007986:Smp_048870	13.8814	14.0606	0.883552	14.7576	18.8866	17.7868	10.0078	12.0208	7.58215	11.8832	14.2522	1.08903	19.2051	22.7639	23.7494	11.6377	10.3578	9.3869	12.627	12.6799	13.2155	0.690755	5.96562e-11
SmVG_007986:Smp_048880	13.8814	14.0606	0.883552	14.7576	18.8866	17.7868	10.0078	12.0208	7.58215	11.8832	14.2522	1.08903	19.2051	22.7639	23.7494	11.6377	10.3578	9.3869	12.627	12.6799	13.2155	0.690755	5.96562e-11
Smp_065580	112.66	101.606	0.596907	132.439	163.895	158.895	73.2728	86.0048	58.6382	88.8378	107.162	0.635772	161.981	188.606	206.6	97.1134	80.1857	69.1595	94.731	92.8306	110.247	0.689685	8.34305e-09
Smp_140680	888.251	938.177	0.624234	1124.31	1002.47	962.657	541.141	614.98	599.642	825.264	902.184	0.659466	1371.61	1283.26	1357.46	640.457	675.14	692.772	726.714	759.375	777.415	0.688594	1.54139e-06
Smp_150200	6.40779	6.5021	0.365019	3.78477	6.77455	5.04113	3.3833	4.17223	1.89941	3.78364	4.65157	0.75008	4.94641	5.58713	5.08602	2.77186	2.51575	2.43583	3.14504	2.67098	3.49136	0.68541	4.52636e-10
Smp_092850	13.061	11.8344	0.98249	20.0046	23.7999	21.6483	11.5061	12.9414	9.2529	10.1671	13.9524	1.00051	30.3067	32.7016	26.3987	12.9942	14.8114	13.8531	17.4074	13.0032	18.3243	0.685119	1.01053e-09
SmVG_009138	19.397	26.9337	1.70105	15.1258	13.5944	12.6951	3.68538	5.53186	8.08017	9.46887	11.4453	0.696064	8.86486	9.84643	8.93072	5.04864	5.22732	4.50737	5.90163	5.31219	6.53652	0.684527	8.80895e-06
Smp_061040	42.4648	35.1215	0.700968	43.5701	49.3181	47.2661	24.4778	28.4382	22.3077	39.4968	47.3548	0.71188	62.6502	67.3579	65.2207	37.5521	33.8572	30.7767	37.635	35.1896	42.6271	0.684291	1.36261e-09
Smp_024590	398.933	350.744	0.673708	308.806	304.408	257.157	143.656	189.373	163.193	294.283	345.484	0.629703	313.837	315.593	298.598	158.142	159.334	161.005	182.034	163.291	190.55	0.683329	1.22718e-09
Smp_132170	8.59737	7.4736	0.364887	4.05704	8.25897	7.43213	4.41115	5.23892	2.07681	9.86349	11.1579	0.6802	10.9756	13.2488	12.1549	7.12981	6.10777	5.47219	7.42019	6.38743	8.05505	0.683055	3.0086e-11
Smp_087340	10.1109	7.53965	0.432981	4.19147	7.07452	6.03944	3.58876	4.39659	2.12584	10.2365	10.5175	0.759493	9.38397	10.9441	8.33993	4.59754	4.39467	4.55334	6.03552	4.28118	5.5121	0.682097	9.08529e-10
Smp_084540	25.2309	23.6892	0.533349	12.1295	18.8118	16.6968	9.51323	12.4307	6.14058	18.9539	23.3716	0.765809	18.2903	20.9442	19.0844	10.5499	9.73174	8.91649	11.7112	10.1058	12.9224	0.681974	2.41296e-13
SmVG_002476	28.089	26.1773	0.608215	16.5475	21.1527	13.346	9.22377	12.0178	8.43665	25.0631	23.6713	0.658489	23.5337	27.775	21.0772	11.9754	12.7061	11.4421	15.7908	11.4276	14.6147	0.681775	1.76481e-07
Smp_152440	23.2749	22.5962	0.546295	14.4386	20.139	15.243	11.1508	12.9508	7.22277	24.3015	25.0691	0.785358	23.22	30.6814	23.0159	12.331	11.7172	11.3192	17.0563	12.2025	15.1225	0.680583	1.6669e-14
SmVG_007423	91.1597	106.248	1.42943	38.0113	47.7073	24.8092	11.2009	13.1	21.1777	48.0819	44.3076	0.728837	36.1277	38.6301	38.9766	17.1809	14.8378	18.787	22.3455	21.4367	18.5337	0.680504	0.000304297
Smp_076390	18.4565	14.8195	0.562952	8.2826	12.201	10.352	5.4357	6.37543	4.28717	23.9437	29.5545	0.75123	22.8186	24.8943	22.9501	12.8704	10.4345	11.2189	13.9041	12.1974	15.4205	0.680122	2.47697e-11
Smp_023840	116.233	126.344	0.98192	149.661	134.997	98.7429	92.9456	129.923	155.091	17.8097	18.6938	0.633503	21.5194	25.4666	25.9257	21.5286	22.4989	22.3957	29.2483	27.7212	26.2706	0.67945	3.73138e-09
Smp_205070	13.8768	8.71541	0.771512	5.71501	12.2835	7.60603	5.04199	7.65326	3.9511	5.34871	5.62084	1.10891	6.10946	7.72005	4.96155	3.27574	2.74423	3.66767	5.18533	3.24154	4.46209	0.676783	0.0006433
SmVG_030464:Smp_130490	12.5383	11.4883	1.02875	6.66548	7.39577	5.56479	2.80596	3.30393	3.44199	7.38766	7.6535	0.734484	5.23177	6.4748	6.4106	3.17022	2.53127	2.63487	3.707	3.48286	3.51615	0.675374	1.36315e-07
SmVG_030464:Smp_130500	12.5383	11.4883	1.02875	6.66548	7.39577	5.56479	2.80596	3.30393	3.44199	7.38766	7.6535	0.734484	5.23177	6.4748	6.4106	3.17022	2.53127	2.63487	3.707	3.48286	3.51615	0.675374	1.36315e-07
Smp_074060	6.07701	4.51544	0.575046	2.22761	4.83154	4.44842	2.16914	2.52445	1.20697	6.64129	8.96101	0.687259	7.08398	8.6732	7.90193	5.22094	3.62341	3.51663	4.97509	4.41393	5.4632	0.673543	1.4852e-08
SmVG_012273	25.3174	22.5687	1.32985	11.8051	17.1265	19.5804	9.97743	12.4482	10.2058	14.4408	20.8139	0.759958	12.1041	18.924	16.7191	18.9682	11.3954	10.0202	17.1355	16.1258	19.7426	0.672835	0.000260716
Smp_203620	10.2121	10.7698	1.167	5.20624	7.14485	3.12205	2.14941	4.58132	3.23227	11.5239	12.1294	0.609009	7.36002	9.49017	10.4233	5.03736	4.77095	3.54153	6.6646	5.74517	6.82683	0.672091	0.000148698
Smp_012790	137.467	122.841	0.920615	94.9674	94.0541	80.559	38.337	47.02	45.69	103.801	133.79	0.673586	106.024	102.906	108.679	52.862	50.3911	49.9644	55.5727	56.0232	64.8984	0.667712	9.44878e-08
Smp_126370	39.409	38.6298	0.64054	32.4326	33.6279	32.2502	17.0424	21.1829	15.7672	63.052	68.1903	0.723062	64.6195	74.7864	60.9126	31.3613	34.649	30.5242	40.9452	30.8056	38.9364	0.666205	5.28286e-11
Smp_080980	40.0111	37.8866	0.483506	23.1207	27.2532	24.089	14.0069	18.3617	11.6366	65.2267	80.2274	0.691704	61.3065	64.7528	63.6517	32.2755	31.6152	29.5873	35.9801	33.5132	39.51	0.665994	9.39062e-11
SmVG_024428	30.2216	26.4884	1.03757	13.3042	16.7836	15.9016	10.7855	9.47783	10.7239	26.401	30.4448	0.702322	16.2176	21.0633	20.2321	16.7126	13.4585	10.9673	17.5472	16.5682	17.5146	0.665954	4.64494e-06
Smp_170470	4.82548	3.17929	0.645563	3.98825	7.63034	6.51173	3.55689	4.01846	2.49369	3.32488	4.87631	0.622154	5.80932	7.74849	8.85856	4.78001	3.79073	3.20259	4.66311	4.82059	5.45892	0.664165	3.39441e-05
Smp_059910	67.2806	55.9875	0.381266	38.2014	53.9065	50.0099	26.1156	32.8469	18.9774	86.8147	101.017	0.535221	87.36	100.717	92.4916	49.7027	43.9118	41.3489	54.8502	47.5701	59.6233	0.663108	5.47985e-12
Smp_155760	143.159	142.707	0.67053	86.3618	109.832	105.691	51.7883	62.3132	41.5416	223.216	247.466	0.624886	218.359	248.148	253.647	127.697	120.913	103.842	136.093	129.914	135.457	0.662009	3.20345e-10
SmVG_002720:Smp_210380	19.3949	16.516	0.549602	13.4985	17.8592	15.4744	8.93142	10.5096	6.44552	16.4416	20.9271	0.681853	17.9368	21.9516	20.9029	10.9535	10.0077	8.28852	11.7639	10.4942	13.0455	0.661034	2.38276e-11
SmVG_002720:Smp_210390	19.3949	16.516	0.549602	13.4985	17.8592	15.4744	8.93142	10.5096	6.44552	16.4416	20.9271	0.681853	17.9368	21.9516	20.9029	10.9535	10.0077	8.28852	11.7639	10.4942	13.0455	0.661034	2.38276e-11
Smp_091640	1954.55	1736.18	0.767113	1596.49	1399.37	1381.41	743.738	960.686	853.908	709.642	979.301	0.628553	745.519	726.374	799.341	389.741	397.48	378.39	415.146	436.307	507.152	0.66097	1.46646e-06
Smp_009230	69.2239	51.4943	1.80539	28.981	38.8021	38.3805	9.22699	11.6951	18.2131	1094.36	1375.29	0.573332	819.639	897.874	1289.87	635.207	708.93	505.838	624.28	852.381	700.29	0.659459	0.000392033
Smp_206120	60.4388	62.7731	0.736991	33.1915	48.1094	40.8092	26.8637	26.3542	17.2115	83.7248	88.0524	0.581043	75.6202	103.408	86.7966	48.9286	50.8615	40.3711	62.3047	50.4487	60.6934	0.65752	2.98683e-12
Smp_080920	35.5186	39.0666	0.363809	43.6849	54.0681	44.0163	28.4436	33.4961	20.6055	72.3799	86.0108	0.664235	133.733	153.304	140.509	68.8263	65.781	62.7348	82.5962	70.0307	84.7557	0.656236	1.04808e-10
Smp_170230	50.8407	46.3284	0.647888	34.5114	40.0474	36.0267	20.0756	22.2765	16.9374	34.2994	42.5222	0.687413	35.4651	38.257	41.5489	21.426	17.7856	16.7426	20.9058	21.216	22.6713	0.655497	3.76514e-07
Smp_095670	248.832	197.199	0.646449	148.167	215.436	211.71	92.9222	123.771	77.3855	158.652	186.315	0.668954	172.471	208.805	201.931	125.64	94.367	85.5467	116.604	109.617	126.098	0.653612	4.63699e-08
SmVG_024971:Smp_094470	21.4065	19.3701	0.512284	14.6524	16.2555	14.9985	8.33935	9.66582	7.66611	44.573	49.254	0.470856	46.1808	51.2126	46.0544	24.4601	24.5749	23.1582	29.2418	25.0793	31.0273	0.653453	1.34351e-10
SmVG_024971:Smp_173910	21.4065	19.3701	0.512284	14.6524	16.2555	14.9985	8.33935	9.66582	7.66611	44.573	49.254	0.470856	46.1808	51.2126	46.0544	24.4601	24.5749	23.1582	29.2418	25.0793	31.0273	0.653453	1.34351e-10
Smp_148540	129.504	102.267	1.16741	82.7405	103.83	68.1632	29.3848	35.6491	42.3428	52.4805	50.3349	0.610992	56.699	63.0528	53.7685	28.1026	27.4567	28.2577	35.6457	28.8927	31.4309	0.651974	1.24149e-11
Smp_160560	63.6125	61.4778	0.652529	68.7061	93.318	88.0559	55.3188	67.9601	39.977	27.3233	31.1023	0.755443	50.9974	60.2804	53.9808	30.0087	29.4666	28.3253	37.893	32.314	38.7085	0.649477	1.11547e-12
Smp_127700	7.55014	8.72547	0.766541	4.92594	7.02945	4.68449	2.45261	3.80972	2.62332	7.28484	6.52823	0.672359	8.59515	9.35214	6.8184	4.14729	3.77435	4.44493	5.48106	3.81702	4.61211	0.648546	1.02306e-05
Smp_135980	6.15834	9.60038	2.25131	4.59057	8.01731	6.21308	1.0773	1.58161	2.36803	9.58023	11.5105	0.692538	13.9025	18.8842	16.8963	9.0176	7.75698	6.93049	10.7631	9.10027	10.6638	0.648332	1.90862e-12
Smp_180170	16.9637	17.4026	0.900044	12.9015	12.947	11.9668	5.05857	6.08522	6.08294	14.3861	19.7837	0.623063	15.2191	15.3339	16.602	7.64724	7.2701	7.03561	8.1339	8.29613	10.0474	0.647813	3.01373e-07
Smp_165870	149.856	137.03	0.521532	107.541	150.325	127.024	83.051	102.008	54.582	77.4101	90.9353	0.697766	96.4157	117.892	111.414	53.7005	56.3654	47.4228	65.8121	59.3192	63.2983	0.647034	3.09922e-10
Smp_085790	7.23258	7.2736	0.50494	4.27529	5.21569	4.33632	3.27084	3.80218	2.33433	6.97036	5.94437	0.726293	5.14965	7.15656	5.36067	3.07583	3.03449	2.70444	4.2295	3.05699	3.47493	0.646409	2.36911e-10
Smp_063380	21.807	17.2539	0.697211	5.52578	9.67359	11.1411	6.49957	6.98774	3.79528	19.7963	25.5591	0.623781	9.9113	13.6584	17.2117	11.7901	9.31402	6.65986	10.0352	10.8582	13.2418	0.646363	0.000403773
Smp_018310	190.791	168.818	0.853825	111.626	135.936	114.452	56.3042	62.179	59.8014	126.754	177.024	0.40971	158.724	136.167	155.844	101.733	79.5111	82.9475	80.4585	87.1627	95.5361	0.645317	0.00025233
Smp_046980	45.5677	45.3103	0.591742	19.7673	29.9243	26.0839	15.6884	19.6541	10.288	68.2455	74.7573	0.680789	54.531	72.9757	61.4398	32.469	34.0815	27.2535	41.6333	33.5694	39.4659	0.64488	2.57937e-12
Smp_003660	123.153	114.455	0.381592	76.0596	108.938	98.9529	59.1239	73.2836	37.2366	101.77	105.775	0.603506	89.6088	130.906	117.06	62.0606	53.0872	42.0152	70.3577	59.1116	67.048	0.644852	3.38555e-10
Smp_054450	16.5595	19.1426	0.710011	13.4461	20.1344	10.7871	10.3426	13.9018	9.62008	9.0815	7.00147	0.954627	11.7853	16.053	15.1583	9.52735	8.08235	6.88608	10.4926	9.95765	8.58179	0.64457	9.38443e-05
SmVG_028680:Smp_076880	21.6901	19.3169	0.861201	16.3508	21.7416	17.2757	11.2217	12.783	8.74662	12.5639	14.2636	0.887949	14.8548	19.9571	17.5593	9.62164	8.66878	7.56259	11.4636	9.78522	10.9462	0.640444	9.92495e-14
SmVG_028680:Smp_076890	21.6901	19.3169	0.861201	16.3508	21.7416	17.2757	11.2217	12.783	8.74662	12.5639	14.2636	0.887949	14.8548	19.9571	17.5593	9.62164	8.66878	7.56259	11.4636	9.78522	10.9462	0.640444	9.92495e-14
Smp_035280	8.43072	7.32065	0.387854	7.36976	11.3288	9.38169	6.41677	7.49837	3.71352	6.50785	6.55732	0.671683	10.4314	12.8434	10.462	6.16045	5.61295	5.08772	7.16043	5.56429	6.82183	0.637471	1.25259e-13
Smp_033610	92.5908	94.1873	0.80812	129.058	122.642	101.904	60.9908	63.0698	65.7962	86.6212	102.732	0.688011	177.62	174.012	170.784	83.9995	89.7815	86.4818	97.0391	89.2896	105.704	0.636623	1.59006e-07
Smp_060910	1156.21	1252.84	0.836822	820.428	723.766	683.131	336.764	430.138	427.826	889.551	1007.03	0.575716	747.024	789.481	653.454	375.387	395.278	379.695	454.219	375.392	464.475	0.636323	3.73171e-08
Smp_208070	28.8947	23.5881	0.710788	16.8212	20.455	17.3411	11.2972	13.4386	9.53408	25.0149	28.4924	0.702073	21.0615	25.1942	27.1136	15.0894	14.6186	11.7575	16.2358	16.7273	17.5395	0.636262	2.2609e-05
SmVG_035022	12.9495	7.03312	0.770781	8.91923	18.7587	18.744	10.0151	11.846	7.50812	11.2619	13.2226	0.606346	15.4861	22.8466	20.0256	20.0493	14.8618	13.1823	20.4293	17.1972	18.358	0.633984	5.52166e-07
Smp_133110	146.314	135.825	0.438133	92.9726	128.348	101.872	66.0459	75.6229	46.9317	138.937	138.589	0.633351	137.997	170.698	148.488	81.1835	72.7751	65.4892	92.3712	75.571	83.7626	0.633392	5.08452e-13
SmVG_000645:Smp_150440	16.0746	15.4442	0.439538	11.8844	16.1351	11.9471	8.49917	10.7923	6.21651	9.10261	10.5936	0.651937	11.5838	14.4337	12.1411	6.88177	6.23486	5.75597	8.20825	6.5595	8.29874	0.632482	9.00986e-09
SmVG_000645:Smp_150450	16.0746	15.4442	0.439538	11.8844	16.1351	11.9471	8.49917	10.7923	6.21651	9.10261	10.5936	0.651937	11.5838	14.4337	12.1411	6.88177	6.23486	5.75597	8.20825	6.5595	8.29874	0.632482	9.00986e-09
Smp_066150	33.1893	30.222	0.396807	19.4329	32.2235	26.1927	16.3295	20.7303	10.3482	50.9867	58.5781	0.714191	63.4422	80.2658	69.9325	38.8889	38.18	32.1545	46.0572	38.7636	46.728	0.630486	5.46811e-13
Smp_164000	152.999	118.22	0.719367	82.996	144.647	186.017	94.1477	105.345	55.2417	115.106	180.286	0.568598	106.772	130.955	175.722	144.917	105.853	77.5849	104.621	131.394	148.615	0.629982	0.00057006
Smp_071640	93.1834	79.1379	0.631633	80.0946	94.2407	74.2621	46.678	52.7415	39.1022	87.2543	92.1683	0.657882	103.743	134.753	123.343	63.5808	54.019	48.885	73.1265	62.9003	67.0679	0.629858	3.06054e-11
SmVG_020690	2.74351	2.88418	0.73764	2.6939	3.58167	3.77728	2.33349	2.80444	1.74395	2.80284	3.89834	0.637214	6.31016	5.95331	5.43524	4.51501	3.53432	3.77621	3.94121	3.67949	4.87631	0.626617	3.49346e-05
Smp_172190	60.9849	54.6567	0.566698	38.3194	48.0467	35.4479	23.4806	28.3853	19.0372	44.663	46.7931	0.723362	43.9979	54.8782	49.174	23.2942	24.1581	21.1633	30.193	25.4455	27.4593	0.626614	5.89051e-10
Smp_122940	7.69094	7.53976	0.788896	4.74984	6.6965	5.42779	2.61451	3.73297	2.42117	7.26401	7.71819	0.749382	6.96303	10.3965	8.8488	5.39907	4.37128	3.49038	5.97345	4.81371	5.62574	0.626523	3.83961e-07
Smp_022430	28.8434	25.1017	1.06417	30.4548	36.6811	31.133	13.1994	16.9604	15.5613	23.2669	29.947	0.606692	39.0337	43.1832	48.7973	25.5701	20.8046	19.088	24.0304	25.9065	28.2412	0.625293	3.63751e-07
Smp_061200	2499.73	2292.53	0.534392	2148.07	1802.5	1853.27	1034	1255.9	1065.7	1064.27	1328.44	0.540013	1190.96	1072.34	1188.4	579.662	576.23	572.331	597.038	632.647	674.108	0.624981	3.21116e-05
Smp_136090	35.2675	30.1762	0.521899	23.1612	28.8548	22.8279	14.5601	18.3415	11.3832	22.7763	22.8692	0.696238	22.409	27.623	20.9664	11.0591	11.5441	10.6378	14.7956	10.8074	13.0388	0.623467	6.13632e-11
SmVG_023391:Smp_174870	9.44385	8.56427	0.434545	4.45134	8.0373	6.68384	4.23468	5.53114	2.25737	14.2442	17.3478	0.670853	13.8114	18.2621	15.6049	10.2863	8.40126	6.75695	10.2192	8.27686	11.0388	0.623382	7.63643e-08
SmVG_023391:Smp_174890	9.44385	8.56427	0.434545	4.45134	8.0373	6.68384	4.23468	5.53114	2.25737	14.2442	17.3478	0.670853	13.8114	18.2621	15.6049	10.2863	8.40126	6.75695	10.2192	8.27686	11.0388	0.623382	7.63643e-08
Smp_130940	161.535	123.172	0.687033	107.846	126.063	104.148	54.5181	76.636	58.7392	134.939	157.437	0.67598	143.919	158.743	149.776	78.4144	83.5718	75.2237	92.4043	85.3933	99.2671	0.623049	7.72893e-07
Smp_068960	25.17	21.8644	0.381475	10.2313	17.7399	17.2623	9.56172	11.5521	4.97983	41.249	47.8807	0.600837	34.2832	44.4467	41.1793	25.0481	18.5535	16.2394	24.1626	21.0305	26.3826	0.622759	2.78939e-08
Smp_074570	10.5574	8.2242	0.871034	19.0891	22.5699	17.8577	7.76438	10.1676	10.3158	13.3367	13.4679	0.418592	30.6204	35.4769	24.1052	14.9749	15.4469	15.8201	20.5272	13.673	21.2077	0.622586	1.59465e-07
Smp_128830	21.1929	10.7545	0.779303	15.6145	28.5	34.3562	29.302	33.8345	16.8459	26.4146	43.1225	0.701064	44.8605	42.1987	60.4886	93.9724	62.1124	56.5509	61.0089	75.9622	88.7681	0.622426	0.000566101
Smp_163100	14.5914	15.6578	0.553049	7.95882	12.7518	11.258	6.30871	7.81039	3.76639	12.014	14.6468	0.717985	12.8048	15.8476	15.6035	9.56713	6.90207	6.11056	8.74741	7.84228	9.50366	0.621176	1.64923e-07
Smp_120640	75.7474	67.2833	0.336725	36.549	52.378	46.7939	30.0058	34.5754	18.1071	74.39	82.6091	0.596639	55.781	76.4303	68.6305	39.4294	32.2081	26.5009	41.7161	35.4937	41.4332	0.620637	4.17904e-10
SmVG_000685:Smp_025670	26.4225	28.0873	0.537132	13.2246	16.0353	13.3448	8.98746	10.5295	6.87117	31.2102	31.3273	0.663859	22.2562	30.2689	24.0408	12.6278	12.3067	10.9118	16.9433	12.742	15.1832	0.619665	2.24091e-12
SmVG_000685:Smp_025680	26.4225	28.0873	0.537132	13.2246	16.0353	13.3448	8.98746	10.5295	6.87117	31.2102	31.3273	0.663859	22.2562	30.2689	24.0408	12.6278	12.3067	10.9118	16.9433	12.742	15.1832	0.619665	2.24091e-12
Smp_035310	109.138	85.2512	0.575472	67.4418	94.2217	94.0277	45.7041	53.6422	32.1643	83.1143	99.5317	0.640588	74.4502	101.089	98.6626	51.5262	42.7912	34.516	53.7019	49.5258	56.0121	0.619397	3.96978e-09
SmVG_016386	3.31972	2.76354	0.965529	2.49846	2.92935	2.77644	1.33299	1.51282	1.40623	2.58369	3.47947	0.662209	3.38354	3.14849	3.39156	2.47967	1.7368	1.88116	2.02907	1.98025	2.44082	0.618994	0.00017088
Smp_026390	7.7821	6.7959	0.570462	2.39121	4.5952	3.43813	2.51806	3.31301	1.55886	6.26516	6.63375	0.682647	4.32886	5.24255	5.13252	3.41555	2.99254	2.63195	3.82555	3.30583	3.66778	0.618857	2.75836e-09
Smp_141330	116.865	108.558	0.467049	76.9993	95.5166	78.3634	53.4402	66.3742	38.5069	61.0854	63.8204	0.725741	60.4698	76.3931	63.7685	32.9335	33.5315	29.0658	41.7214	33.1278	37.4269	0.618589	8.32843e-13
SmVG_015976	51.9838	56.2193	0.704079	72.4276	102.041	67.7008	46.0505	58.2181	35.6954	33.7193	45.9871	0.788551	99.8085	103.86	93.8804	51.6606	50.753	49.8842	59.6576	52.5949	64.8651	0.617824	2.19495e-08
Smp_138280	11.8409	11.1772	0.748584	9.36601	12.4141	8.66072	5.67398	6.80401	4.57842	7.09976	7.25366	0.715921	9.00532	11.3952	9.96204	4.87921	5.1554	4.3406	6.25023	5.14123	5.64456	0.616072	3.13323e-08
SmVG_012603:Smp_120960.1	11.6449	9.26334	0.580866	9.72654	13.8222	12.4872	7.97811	10.2624	6.59884	6.17234	8.19477	0.647264	10.6053	11.4171	11.1763	7.62412	7.08968	6.23586	7.70233	7.32407	9.36053	0.616017	4.02298e-09
SmVG_012603:Smp_120960.2	11.6449	9.26334	0.580866	9.72654	13.8222	12.4872	7.97811	10.2624	6.59884	6.17234	8.19477	0.647264	10.6053	11.4171	11.1763	7.62412	7.08968	6.23586	7.70233	7.32407	9.36053	0.616017	4.02298e-09
SmVG_012603:Smp_120960.3	11.6449	9.26334	0.580866	9.72654	13.8222	12.4872	7.97811	10.2624	6.59884	6.17234	8.19477	0.647264	10.6053	11.4171	11.1763	7.62412	7.08968	6.23586	7.70233	7.32407	9.36053	0.616017	4.02298e-09
SmVG_012603:Smp_120980	11.6449	9.26334	0.580866	9.72654	13.8222	12.4872	7.97811	10.2624	6.59884	6.17234	8.19477	0.647264	10.6053	11.4171	11.1763	7.62412	7.08968	6.23586	7.70233	7.32407	9.36053	0.616017	4.02298e-09
SmVG_012603:Smp_213380	11.6449	9.26334	0.580866	9.72654	13.8222	12.4872	7.97811	10.2624	6.59884	6.17234	8.19477	0.647264	10.6053	11.4171	11.1763	7.62412	7.08968	6.23586	7.70233	7.32407	9.36053	0.616017	4.02298e-09
Smp_094760	69.6776	65.6178	0.518662	35.7027	49.9242	38.7271	24.5756	28.8984	17.4391	95.366	89.7018	0.62167	79.4429	101.282	90.7726	46.5552	44.0211	37.4237	54.5996	45.2045	46.3759	0.614308	4.78133e-11
Smp_085070	16.1189	11.3089	0.621663	5.1993	10.3264	9.20569	4.64252	5.9121	2.63262	19.6905	29.2115	0.66988	14.9011	18.9893	19.7261	14.4231	8.6634	7.2526	10.5641	10.408	14.6155	0.61356	0.000832401
SmVG_012638	36.1052	34.0285	0.634188	28.3244	34.0758	33.5719	18.5387	21.9937	13.5563	28.2983	30.4908	0.6787	31.3847	40.0504	34.7311	19.4862	18.2087	14.7365	21.7306	17.5451	21.5676	0.613295	2.10566e-11
Smp_069220	43.6466	45.4122	0.945589	34.8878	35.9485	26.5104	15.2924	15.7622	17.2736	28.2883	24.945	0.649514	25.7948	34.9289	26.9828	13.9398	13.1599	12.2766	19.0517	14.275	14.2261	0.613124	4.8914e-08
SmVG_014445:Smp_083970	19.465	20.6166	0.970966	15.7483	18.2576	17.2327	8.3798	10.341	8.64219	11.9932	14.2401	0.646391	15.9887	17.8803	19.6012	10.2382	9.18977	8.23452	10.3747	10.9423	11.2452	0.613065	2.39717e-08
SmVG_014445:Smp_083980	19.465	20.6166	0.970966	15.7483	18.2576	17.2327	8.3798	10.341	8.64219	11.9932	14.2401	0.646391	15.9887	17.8803	19.6012	10.2382	9.18977	8.23452	10.3747	10.9423	11.2452	0.613065	2.39717e-08
Smp_162070	313.408	237.105	0.764225	148.879	255.846	368.565	162.821	190.288	96.6304	199.874	292.189	0.617512	196.345	233.294	307.614	211.529	162.985	122.42	164.251	196.776	205.995	0.610653	0.000137544
SmVG_000217:Smp_073510	15.8161	14.8156	0.572075	8.15102	11.8241	9.17485	5.76521	7.02732	4.05943	10.9895	11.5981	0.642854	10.8514	12.7665	10.5522	6.2847	5.75247	5.37513	7.21608	5.71275	6.89836	0.609127	2.28152e-13
SmVG_000217:Smp_161960	15.8161	14.8156	0.572075	8.15102	11.8241	9.17485	5.76521	7.02732	4.05943	10.9895	11.5981	0.642854	10.8514	12.7665	10.5522	6.2847	5.75247	5.37513	7.21608	5.71275	6.89836	0.609127	2.28152e-13
Smp_025560	43.4705	37.7748	0.539567	17.0381	24.2074	20.9544	14.624	16.5183	9.68375	38.373	47.5599	0.652148	22.6394	29.8315	29.2361	20.0901	16.9365	13.6037	20.3751	19.2906	22.4477	0.609122	1.29704e-08
Smp_036390	91.1369	79.9065	0.983984	99.6922	92.683	80.6494	38.0595	42.5736	51.1468	61.9496	84.8396	0.625603	81.7284	94.6023	85.0409	51.7583	48.8043	40.7106	53.7897	46.704	60.2928	0.609107	2.05401e-08
Smp_078640	26.572	23.2673	0.967464	62.4608	61.1364	52.1686	29.8226	32.2277	34.0447	20.6959	24.5422	0.752489	74.243	68.5444	81.4272	40.116	36.9936	38.1874	39.7578	45.8475	49.5152	0.608496	1.64505e-05
Smp_179000	69.7246	72.4186	0.462783	37.404	53.7157	45.4601	29.6262	33.4473	18.0616	66.3355	67.3742	0.615122	46.8706	72.2734	56.7944	32.9458	28.599	21.815	38.5342	28.7321	34.7919	0.60789	1.52871e-10
Smp_175070	12.9797	13.0214	0.736802	9.17325	12.2899	10.2746	6.57356	7.98778	4.79415	16.8146	19.4924	0.735236	18.1639	22.6863	20.4452	11.4857	10.8936	9.12677	13.0373	11.1044	13.3753	0.60769	1.3524e-11
Smp_018620	14.0039	13.4557	0.387996	9.43222	15.0837	15.8091	9.32197	10.9082	4.59986	17.8591	21.8214	0.640599	24.9201	28.7887	24.629	15.499	12.998	11.8229	15.597	12.6204	17.2716	0.606662	4.88004e-10
Smp_026300	21.6463	17.4371	0.700943	10.8449	15.3721	12.5814	6.53814	7.93336	5.16864	14.534	18.8487	0.652086	14.9495	15.4489	14.7081	8.01025	7.90184	6.94594	8.34562	7.40204	9.91424	0.605936	6.77299e-09
Smp_054560	203.315	214.797	0.878543	419.066	342.698	309.315	151.912	173.386	204.608	210.365	221.791	0.565799	469.458	503.264	471.508	238.001	241.14	218.87	269.988	238.422	271.031	0.605757	2.09086e-07
Smp_021750	47.6189	44.8146	0.760763	27.8244	34.2702	28.667	16.0686	18.266	13.0272	41.2684	39.9477	0.70018	35.7427	46.3318	35.6949	18.6146	19.6637	16.3627	24.6769	17.7102	20.1065	0.604995	2.9922e-11
SmVG_019903	1.92879	1.33464	0.453064	1.75108	2.19581	2.59415	1.1051	1.52776	1.3706	1.95411	3.32142	0.753496	2.13214	2.76019	3.05762	2.36364	1.56366	1.45169	1.80969	2.01073	2.41112	0.604625	0.00025731
SmVG_032063:Smp_067980.1	179.196	181.748	0.799828	163.889	185.635	168.913	109.824	133.717	103.988	208.539	261.189	0.714428	280.497	317.978	325.836	192.876	196.783	166.113	215.506	212.739	235.708	0.604593	9.17887e-08
SmVG_032063:Smp_067980.3	179.196	181.748	0.799828	163.889	185.635	168.913	109.824	133.717	103.988	208.539	261.189	0.714428	280.497	317.978	325.836	192.876	196.783	166.113	215.506	212.739	235.708	0.604593	9.17887e-08
SmVG_032063:Smp_067980.4	179.196	181.748	0.799828	163.889	185.635	168.913	109.824	133.717	103.988	208.539	261.189	0.714428	280.497	317.978	325.836	192.876	196.783	166.113	215.506	212.739	235.708	0.604593	9.17887e-08
SmVG_032063:Smp_067990.1	179.196	181.748	0.799828	163.889	185.635	168.913	109.824	133.717	103.988	208.539	261.189	0.714428	280.497	317.978	325.836	192.876	196.783	166.113	215.506	212.739	235.708	0.604593	9.17887e-08
SmVG_032063:Smp_067990.4	179.196	181.748	0.799828	163.889	185.635	168.913	109.824	133.717	103.988	208.539	261.189	0.714428	280.497	317.978	325.836	192.876	196.783	166.113	215.506	212.739	235.708	0.604593	9.17887e-08
Smp_113630	15.1331	13.3856	0.763014	16.6284	19.0084	17.7792	8.72555	9.72404	7.76232	11.4853	12.548	0.77787	20.537	22.8762	23.2151	12.4358	10.381	9.18154	11.7891	11.4639	12.852	0.603375	1.97558e-08
Smp_052910	232.952	250.807	0.761268	224.615	250.847	194.557	132.165	152.759	111.618	364.99	417.181	0.742716	491.279	602.757	491.066	265.57	271.901	234.086	329.915	255.551	316.194	0.603106	4.1913e-10
Smp_166600	36.2805	36.7415	0.47515	39.7385	44.0401	39.5081	26.05	29.5116	19.5795	68.8304	81.1161	0.623651	84.4212	89.8346	73.6593	43.5942	44.8039	42.0169	50.6438	42.4758	55.2971	0.602376	6.87126e-09
SmVG_034756	14.5433	10.9228	0.507683	13.1272	20.0908	19.6982	10.7887	13.973	7.81691	9.30461	12.9765	0.614894	18.4369	19.6925	19.1276	16.3452	12.0153	11.2225	12.8708	12.4885	16.4737	0.602224	6.1558e-05
Smp_061950	22.8413	27.5019	0.61396	21.9709	30.3994	27.3908	14.746	18.9201	10.8544	33.3825	31.1122	0.56909	45.7004	59.5199	47.3783	27.6745	25.6937	22.0237	32.8599	24.8409	30.2236	0.602164	1.73511e-10
Smp_022560	247.376	217.368	0.585021	247.675	244.255	248.651	130.947	155.656	116.714	177.382	226.851	0.552112	249.761	244.227	248.669	124.082	116.128	115.616	130.511	124.289	150.632	0.6009	1.19892e-06
Smp_089570	1149.09	1197.1	0.491578	771.527	735.33	715.763	468.946	552.937	404.745	1506.68	1847.96	0.536181	1296.62	1383.38	1515.88	772.286	778.6	658.73	801.96	817.275	864.866	0.598786	1.12215e-05
Smp_034980	29.9621	24.2676	0.545938	20.2816	30.0288	28.8457	14.918	18.6303	10.0636	19.0367	23.2523	0.646998	24.3616	29.4148	28.4987	16.4796	13.2442	11.6888	16.1202	14.7663	17.405	0.598171	1.63886e-09
Smp_097750	515.332	480.445	0.499088	618.369	592.817	586.006	305.694	351.696	302.121	298.449	331.094	0.482484	460.209	464.27	470.014	228.173	230.981	217.859	250.347	236.147	254.948	0.594956	1.74012e-06
Smp_006710	9.81437	5.84233	0.5243	6.09242	8.10248	7.87752	5.72627	7.07746	3.88625	9.74581	10.2801	0.732638	8.56185	11.3753	10.5578	9.44469	6.81319	5.72586	8.78321	7.79858	8.89356	0.594734	2.23761e-06
Smp_103710	281.542	260.007	0.672441	198.13	218.593	166.023	95.9293	112.691	99.6279	241.179	250.659	0.544661	214.46	264.039	228.39	121.978	121.557	102.634	145.135	118.399	136.422	0.594656	3.52728e-10
SmVG_012420	100.742	86.0541	0.674593	57.3564	57.8447	54.6915	30.0984	34.7259	27.7219	85.8149	94.2962	0.605079	61.5842	74.6335	68.3232	38.0621	39.1555	29.6537	42.2619	36.1875	41.5381	0.59434	4.65052e-06
SmVG_030827:Smp_121130	14.0152	15.3079	0.638301	9.72617	11.6522	10.917	6.02678	7.2068	4.77663	29.9735	36.8284	0.628707	30.3417	35.4186	33.2694	17.6971	16.4476	14.6072	19.5021	17.2573	21.073	0.594064	4.4874e-10
SmVG_030827:Smp_121140.1	14.0152	15.3079	0.638301	9.72617	11.6522	10.917	6.02678	7.2068	4.77663	29.9735	36.8284	0.628707	30.3417	35.4186	33.2694	17.6971	16.4476	14.6072	19.5021	17.2573	21.073	0.594064	4.4874e-10
SmVG_030827:Smp_121140.2	14.0152	15.3079	0.638301	9.72617	11.6522	10.917	6.02678	7.2068	4.77663	29.9735	36.8284	0.628707	30.3417	35.4186	33.2694	17.6971	16.4476	14.6072	19.5021	17.2573	21.073	0.594064	4.4874e-10
Smp_135740	7.28838	6.26746	1.16012	8.99362	8.88998	7.79771	3.85088	4.82145	4.77594	3.77202	5.72287	0.787659	8.59678	8.57732	9.71374	5.11161	4.85178	4.30708	4.86556	5.12675	5.87302	0.594056	2.80552e-06
Smp_064800	13.2192	14.2109	0.484449	8.24695	9.30682	9.14464	5.12326	6.14881	3.94091	11.66	13.1428	0.608823	11.5385	12.2747	10.7507	5.51932	5.47799	5.36693	6.59744	5.3979	6.51707	0.590953	1.64712e-07
SmVG_008856:Smp_023160	121.411	114.251	0.852072	66.7726	76.427	73.1378	30.3751	39.4439	33.5804	83.44	96.4952	0.60526	76.019	77.6983	76.8623	37.494	38.9362	36.7812	42.7679	40.2721	45.6926	0.589912	4.22549e-07
SmVG_008856:Smp_023170	121.411	114.251	0.852072	66.7726	76.427	73.1378	30.3751	39.4439	33.5804	83.44	96.4952	0.60526	76.019	77.6983	76.8623	37.494	38.9362	36.7812	42.7679	40.2721	45.6926	0.589912	4.22549e-07
Smp_038560	165.643	121.947	0.85022	654.674	740.284	678.09	427.981	502.511	341.509	207.939	266.676	0.896527	1192.35	1412.13	1349.73	741.876	699.461	599.955	804.698	743.446	794.69	0.588652	2.30475e-08
Smp_125180	3.43792	2.02845	1.39789	3.86413	3.23494	2.4939	1.11451	1.27984	1.97367	1.94373	1.67975	0.532578	3.30539	2.96502	3.15965	1.83291	1.42538	1.6729	1.68346	1.8303	1.59969	0.587377	0.00157848
SmVG_002177	9.14131	8.04953	0.739975	4.2565	7.01827	5.94832	2.76562	3.62652	1.99467	10.903	14.5583	0.61864	9.84227	11.9119	11.3422	7.85125	5.39323	4.65352	6.49396	5.75828	7.38793	0.585734	1.53307e-05
Smp_148440	13.3299	10.9289	0.498865	8.37128	15.978	13.6345	7.51843	10.0457	4.29734	10.4743	13.6992	0.674524	16.7389	18.541	17.3569	11.042	9.65696	8.28314	10.4512	9.42078	12.0853	0.58505	1.59697e-07
Smp_171570	334.939	329.865	0.451608	225.02	234.95	241.533	152.44	183.371	120.855	178.156	224.106	0.599246	185.231	179.402	199.982	100.536	95.9433	93.4974	102.228	109.913	118.352	0.58296	5.00869e-06
Smp_094810	23.6204	20.4939	0.498288	19.9908	24.1255	20.5232	12.8398	15.2938	9.97101	35.9249	40.5222	0.620658	46.4808	55.8741	52.0667	28.4513	25.695	22.2782	30.8084	27.1898	30.8906	0.582792	1.06484e-10
Smp_093320	1174.43	1088.61	0.631031	923.118	761.794	710.944	503.517	605.715	587.215	650.439	748.475	0.342406	601.74	567.114	595.274	382.898	362.074	373.039	396.943	399.176	412.252	0.579961	0.000196794
Smp_024240	10.1269	11.0645	1.15018	8.40486	10.6715	10.6503	4.56916	5.25474	4.2975	7.54723	8.29252	0.660913	10.4565	13.2641	11.8641	7.19859	5.84182	5.27337	7.46636	6.50269	7.74245	0.576188	6.76567e-07
Smp_196260	62.9993	56.6426	0.58691	45.6991	59.9795	48.8834	26.3484	32.1528	23.0498	53.0971	57.6457	0.445978	67.0504	69.9779	57.0059	37.6476	34.3753	32.4829	38.8687	29.6808	42.636	0.574888	1.41323e-07
Smp_063300	2228.35	2257.29	0.483629	1792.16	1632.31	1635.94	1069.85	1260.23	950.156	1096.68	1555.03	0.478598	1158.47	1111.91	1325.82	736.951	652.99	588.33	642.806	721.079	789.521	0.574861	7.5374e-05
Smp_039670	22.1915	18.4741	0.487951	6.74142	12.0831	9.49991	6.33273	7.99383	3.64488	19.8862	24.821	0.625756	11.0604	14.6436	10.6216	11.4402	7.3304	6.85255	9.81334	7.32128	10.7883	0.574191	4.40912e-05
Smp_024800	12.5941	12.4605	0.78658	6.56676	11.1432	13.1934	5.47311	6.81079	3.22751	7.35131	7.45842	0.651184	6.98484	9.79517	11.2071	5.8953	4.55506	3.32824	5.38297	5.77485	4.88431	0.573274	0.00102024
Smp_196800	9.3227	7.99848	0.446567	8.46353	14.1471	11.4165	7.72297	8.6877	4.45563	10.0533	11.6019	0.777783	19.2209	23.6417	17.3569	12.3666	10.791	9.48919	13.2001	9.26604	12.7016	0.572985	3.17004e-09
Smp_074140	266.047	266.123	0.900887	152.593	212.893	142.04	97.969	103.37	80.3848	250.435	280.562	0.655504	231.657	343.43	321.39	160.896	150.005	117.255	196.343	175.527	186.652	0.572272	1.82821e-07
Smp_002820	36.9455	32.1016	0.480164	22.1051	36.8947	34.6731	21.297	24.2285	10.9519	20.9695	23.4424	0.682965	22.3149	31.2343	29.7226	16.7392	14.2892	10.7618	17.2742	15.4964	16.8226	0.570857	9.86953e-08
Smp_137600	13.1019	14.0601	1.06172	20.7727	19.9352	18.2179	10.022	11.6987	10.3636	23.6025	25.5681	0.70882	53.0013	57.8258	50.9463	28.8698	27.2774	26.1268	32.8068	27.7837	31.8167	0.56814	3.54286e-08
Smp_028330	99.7915	97.1093	0.570277	65.534	75.8261	71.8866	40.7504	50.6015	34.3302	170.224	191.748	0.565139	166.079	183.732	161.82	95.9975	88.0912	84.1754	103.706	88.5643	108.182	0.567468	1.67971e-09
Smp_044580	894.39	786.493	0.599965	1302.15	1192.49	1105.15	616.496	749.541	568.007	502.463	615.465	0.646785	1018.72	1037.85	1168.59	570.417	515.252	426.03	521.859	510.03	530.999	0.566823	2.62512e-05
Smp_143050	24.6304	23.5764	0.437975	17.9346	26.3742	22.357	14.2091	17.1719	8.73762	20.1818	22.0891	0.648406	23.7089	30.6859	25.4047	15.2617	13.1664	11.2813	16.735	13.0864	16.0332	0.566375	3.1112e-12
Smp_063340	10.6624	8.93656	0.793453	5.12152	7.90046	8.65201	6.32854	7.4569	4.31614	10.3566	12.9087	0.764853	11.0321	12.0228	12.7536	11.8966	10.3029	8.85638	11.2857	10.2526	12.3375	0.566354	3.2916e-08
Smp_211250	1345.67	1254.56	0.641129	1235.33	1243.82	1164.1	683.498	831.635	641.054	649.965	811.011	0.555963	765.437	776.3	829.371	442.815	444.921	390.913	447.036	454.494	527.44	0.565575	1.41272e-05
Smp_100090	523.802	491.902	0.543129	410.828	432.369	439.87	249.834	297.26	204.165	508.03	601.852	0.51885	557.671	577.761	510.329	300.85	304.812	273.998	325.998	272.909	353.051	0.5649	6.20558e-08
SmVG_023893:Smp_025410	16.9104	23.5852	1.60062	11.3859	14.8314	14.4259	6.335	6.34173	8.74674	31.788	33.4654	0.820249	37.2851	49.4473	44.9463	31.928	26.7979	24.9834	36.3974	31.0976	33.6362	0.564272	1.19502e-10
SmVG_023893:Smp_135970	16.9104	23.5852	1.60062	11.3859	14.8314	14.4259	6.335	6.34173	8.74674	31.788	33.4654	0.820249	37.2851	49.4473	44.9463	31.928	26.7979	24.9834	36.3974	31.0976	33.6362	0.564272	1.19502e-10
Smp_179160	182.617	188.687	0.770248	112.395	124.069	99.1585	94.6826	133.542	111.821	149.567	151.537	0.436559	94.0882	104.357	106.825	95.2914	121.539	91.7791	121.291	97.3405	129.88	0.562999	0.000237647
Smp_062610	106.911	98.2183	0.801682	63.4533	77.7289	65.5378	34.0212	39.4485	30.2656	99.3626	103.585	0.559845	94.0225	111.484	106.161	56.1443	55.7307	44.3508	61.0651	52.5708	56.7177	0.562981	2.93278e-08
Smp_210630	283.147	237.79	0.546333	282.956	314.888	249.268	192.498	217.457	147.621	215.561	241.08	0.632713	351.431	378.8	361.472	196.359	193.716	177.848	216.583	198.489	202.818	0.561998	1.56302e-06
Smp_144200	29.3176	25.4828	0.5566	25.9442	30.8192	28.4821	17.6428	19.419	13.5395	38.3882	42.32	0.569556	50.4786	61.6592	53.2162	32.156	28.5118	25.1817	35.0425	28.858	34.0875	0.561848	8.10166e-11
Smp_172520	23.0201	24.2987	1.53146	9.45107	12.6747	5.34792	2.76822	3.88392	5.34835	69.8724	47.5947	0.57537	41.4822	60.4956	38.7319	26.958	22.2021	22.3052	36.1919	22.7876	22.717	0.560762	0.000120025
Smp_074500	98.7612	100.758	0.609302	135.9	133.527	129.394	70.7115	84.991	64.7358	84.452	102.63	0.654324	161.547	167.935	163.223	83.1745	79.6925	73.8918	89.3999	79.7041	94.4042	0.560277	7.42282e-07
Smp_102280	45.6938	43.8859	0.624814	31.647	36.7472	38.2893	22.7638	27.1317	17.511	35.4112	46.4769	0.594518	33.1631	42.931	47.2749	28.4413	23.72	16.8852	25.4468	27.6489	29.1839	0.55829	7.88308e-05
Smp_094770	7.00001	4.98585	0.661836	4.33959	6.09992	6.56133	2.36456	3.25417	2.17824	17.9379	28.295	0.511184	17.4301	21.468	23.1246	15.2617	10.6522	8.44766	11.8881	12.1276	15.44	0.555838	0.000168178
SmVG_015898:Smp_210280	23.6413	22.8201	0.694582	15.5346	19.8428	16.9957	9.42526	10.9391	8.03263	19.318	21.8747	0.570419	20.3887	22.5428	21.1963	11.4019	11.8313	10.0899	12.7487	11.44	13.6822	0.554884	2.62049e-07
SmVG_015898:Smp_210290	23.6413	22.8201	0.694582	15.5346	19.8428	16.9957	9.42526	10.9391	8.03263	19.318	21.8747	0.570419	20.3887	22.5428	21.1963	11.4019	11.8313	10.0899	12.7487	11.44	13.6822	0.554884	2.62049e-07
SmVG_024242:Smp_039640.1	21.2412	17.1762	0.850118	9.95778	15.35	11.7491	5.54759	7.30593	5.14219	14.0366	15.7483	0.611635	11.7622	14.8285	13.2349	8.83811	6.6087	5.81216	8.38039	7.18009	8.5077	0.553478	5.7596e-08
SmVG_024242:Smp_039640.2	21.2412	17.1762	0.850118	9.95778	15.35	11.7491	5.54759	7.30593	5.14219	14.0366	15.7483	0.611635	11.7622	14.8285	13.2349	8.83811	6.6087	5.81216	8.38039	7.18009	8.5077	0.553478	5.7596e-08
SmVG_024242:Smp_203990	21.2412	17.1762	0.850118	9.95778	15.35	11.7491	5.54759	7.30593	5.14219	14.0366	15.7483	0.611635	11.7622	14.8285	13.2349	8.83811	6.6087	5.81216	8.38039	7.18009	8.5077	0.553478	5.7596e-08
Smp_035790	1885.64	1682.16	0.551616	1738.04	1449.34	1378.4	885.555	1020.76	917.417	763.826	916.46	0.394736	836.45	814.259	905.356	478.701	454.058	421.678	466.43	521.28	524.657	0.552884	6.96215e-05
SmVG_030007:Smp_152450	12.8333	11.5811	1.51416	3.96316	6.72306	5.62952	2.45481	1.93681	2.2444	10.9256	12.0031	0.662193	7.28487	9.809	9.73352	5.11415	4.44532	3.9039	5.90103	5.61861	5.97449	0.549276	1.89521e-05
SmVG_030007:Smp_152460	12.8333	11.5811	1.51416	3.96316	6.72306	5.62952	2.45481	1.93681	2.2444	10.9256	12.0031	0.662193	7.28487	9.809	9.73352	5.11415	4.44532	3.9039	5.90103	5.61861	5.97449	0.549276	1.89521e-05
Smp_164770	2.78984	2.83264	0.659455	2.46041	3.41193	2.8349	1.78585	2.06957	1.23844	3.82541	4.39725	0.738001	5.30665	6.98701	5.88659	3.95395	2.92492	2.65334	3.9614	3.11254	3.62764	0.548515	5.48657e-09
Smp_036130	12.7433	13.0301	0.497805	17.1752	20.2549	20.2215	10.5948	12.4926	8.57543	15.5057	17.3254	0.537457	32.3112	34.9462	31.712	17.9405	17.2164	15.5408	19.2443	16.4612	19.4485	0.546949	1.17834e-08
Smp_144570	10.2379	8.37739	0.448477	4.52567	8.44937	8.53084	4.56841	5.65885	2.27057	12.4878	16.6698	0.685141	10.3164	14.8581	12.9885	8.70557	6.7183	5.04109	8.37718	6.84284	9.87039	0.545747	7.99494e-06
Smp_080420	59.6889	60.4808	0.824039	33.2537	39.0847	26.1503	18.0835	18.2829	16.8772	161.824	143.313	0.57331	106.594	158.87	123.411	68.2385	65.6505	52.1082	88.5558	65.0096	68.5207	0.544102	1.49902e-08
Smp_004940	405.436	362.549	0.678664	276.74	262.115	251.85	142.171	172.705	141.059	136.208	165.595	0.546046	133.049	129.359	152.101	75.1105	70.2953	65.6983	72.7434	81.9197	80.4717	0.543269	8.30333e-05
Smp_004820	135.271	131.969	0.868498	222.749	258.532	235.826	127.608	155.732	112.87	99.3551	118.023	0.570756	293.874	337.793	341.195	185.417	177.007	148.225	191.511	180.937	201.606	0.542661	9.46951e-06
Smp_155560	35.834	35.7595	0.477331	15.1955	22.3076	18.8815	12.8136	15.0132	8.36643	44.5607	49.5554	0.616218	33.9312	45.6074	38.491	25.9713	22.0445	18.4171	26.7522	22.2007	25.1712	0.54165	5.86014e-10
Smp_168860	33.8111	29.5068	0.935995	27.507	28.821	23.8566	10.6836	12.398	13.0254	23.6464	26.4322	0.508224	28.9392	27.3813	27.7397	16.5451	12.752	13.3285	14.6242	13.8878	14.8254	0.541502	0.00023312
Smp_195080	446.997	374.624	0.960538	297.266	313.164	249.551	129.887	145.667	159.72	283.262	332.673	0.505402	261.311	288.079	291.964	157.521	159.48	130.283	162.29	159.967	176.792	0.541375	1.47593e-06
Smp_039740	106.066	108.53	0.776759	114.368	120.638	100.736	47.7608	59.4001	54.0209	111.695	111.682	0.45382	135.528	165.697	145.836	81.304	75.3467	63.0142	88.745	73.3897	80.7005	0.541326	4.58193e-09
Smp_058780	9.24518	8.83297	0.860141	10.1604	11.7292	13.734	5.3001	5.98521	4.97035	14.3711	21.0823	0.543117	24.8902	26.8535	27.7277	15.5885	12.9089	11.0327	13.6472	13.1687	17.6646	0.540415	5.08752e-06
Smp_173640	9.40339	8.2166	0.852735	6.66262	7.84515	7.68129	3.70031	4.70927	3.32447	7.58137	9.12798	0.646964	10.2167	11.0395	10.6962	6.07438	5.52958	4.94082	6.11606	5.61033	6.40033	0.539222	1.22347e-06
SmVG_024662:Smp_146190	91.5158	90.6861	0.781529	66.7046	63.3326	56.9225	28.2728	36.4873	31.3293	83.7202	95.5706	0.597692	74.8615	84.8416	86.0761	41.4791	40.7613	34.6223	45.4167	43.428	46.6677	0.538564	1.88337e-06
SmVG_024662:Smp_146200.1	91.5158	90.6861	0.781529	66.7046	63.3326	56.9225	28.2728	36.4873	31.3293	83.7202	95.5706	0.597692	74.8615	84.8416	86.0761	41.4791	40.7613	34.6223	45.4167	43.428	46.6677	0.538564	1.88337e-06
SmVG_024662:Smp_146200.2	91.5158	90.6861	0.781529	66.7046	63.3326	56.9225	28.2728	36.4873	31.3293	83.7202	95.5706	0.597692	74.8615	84.8416	86.0761	41.4791	40.7613	34.6223	45.4167	43.428	46.6677	0.538564	1.88337e-06
Smp_037380	13.2925	9.53717	0.776592	11.4389	16.7718	13.5488	8.32153	11.0651	5.76854	11.5866	13.7452	0.708564	18.4844	22.9486	20.8213	12.2382	11.3531	8.92132	12.6516	10.9067	12.3859	0.537521	2.83407e-07
Smp_166120	3.96325	3.17524	0.768759	8.06363	10.1829	8.47637	4.37482	5.4625	4.08751	2.17733	3.26605	0.611619	8.58812	9.66861	9.46293	5.04078	4.61068	4.12322	5.13899	4.87234	5.62101	0.537332	1.2511e-07
Smp_016670	111.416	102.914	0.869005	85.9687	81.6192	72.3208	35.4418	44.5172	45.1236	101.239	122.867	0.481417	104.964	108.486	103.879	60.0284	56.9484	51.7822	60.7528	56.5391	67.9023	0.537007	9.52709e-06
Smp_049140	38.0943	29.2398	0.830864	21.2969	30.8374	24.6741	12.6477	16.1572	10.7482	24.7394	26.5521	0.654398	25.4015	30.3155	25.0978	15.0547	14.1029	12.5931	17.0696	13.359	15.6901	0.536655	1.00135e-10
Smp_076040	171.37	162.928	0.665378	97.5365	134.336	110.325	66.6792	77.9932	44.9316	136.312	156.803	0.636702	134.342	166.703	149.885	82.4325	75.9264	62.5038	90.1596	74.2381	85.9252	0.535885	1.22289e-09
Smp_105320	755.228	724.759	0.686416	756.589	700.278	700.932	376.966	469.731	376.984	273.781	359.074	0.505352	456.519	394.164	491.191	245.129	224.777	218.776	215.327	253.111	250.872	0.535739	0.000484431
Smp_194170	230.222	230.922	0.712965	132.109	142.558	128.957	68.8804	84.4489	69.9919	247.11	271.576	0.548716	190.376	230.065	219.994	116.728	125.805	95.8613	130.92	120.934	134.273	0.535127	8.23166e-06
Smp_161290	39.3641	36.142	0.417292	29.8649	40.1637	34.8723	20.9006	25.3829	14.3964	37.5247	38.8217	0.529271	39.0836	53.8955	42.7807	24.3895	23.1103	18.0772	28.8866	21.6404	25.746	0.534052	1.60637e-10
Smp_163190	14.6688	14.4597	0.636102	7.14959	11.3824	8.60192	5.07594	7.10443	3.54059	9.17717	7.83743	0.602059	9.08813	10.5316	5.74853	4.601	4.36583	4.38308	5.78658	2.9868	4.44635	0.53369	0.00111597
Smp_199500	184.235	157.726	0.479301	95.8709	129.89	111.486	87.1771	100.654	60.4465	162.167	171.096	0.538868	128.11	164.769	154.492	105.451	100.804	77.0508	112.807	95.1607	106.994	0.529326	2.44549e-08
Smp_048260	86.8052	74.6242	0.600144	52.1525	67.3375	63.6388	40.9898	50.8352	27.9949	59.2592	78.6468	0.669423	72.8471	78.1087	75.3743	47.586	44.7911	37.7026	45.9112	42.3123	51.3629	0.528842	6.32055e-07
Smp_083680	87.665	82.2747	0.389946	51.8868	69.8087	54.1895	39.8059	46.0785	24.8439	52.732	59.483	0.514197	51.0374	60.3178	55.2045	28.5942	32.3032	24.0652	33.0083	27.6126	32.7885	0.528563	1.11461e-06
Smp_012070	44.8222	40.9859	0.610252	21.3979	26.3936	19.7238	13.1375	16.4041	10.3494	41.1307	38.7552	0.576985	27.7175	35.6053	31.0039	15.8538	16.4708	13.1492	19.5269	15.8932	16.6046	0.528043	1.43204e-07
Smp_023700	202.7	194.243	0.814228	164.544	188.801	167.516	84.1798	107.426	83.5542	156.522	160.045	0.513103	173.95	227.732	194.854	111.61	111.101	87.2296	128.499	107.088	118.784	0.527765	7.73268e-09
Smp_009390	170.919	174.095	0.71916	197.428	185.709	161.211	96.1524	115.413	111.475	149.48	160.616	0.444141	210.095	218.034	212.384	130.975	137.178	112.938	130.833	126.493	142.598	0.526701	2.79804e-05
SmVG_016385	13.1337	8.48847	0.842977	5.15071	9.87726	7.54263	3.21318	4.13539	3.33556	10.5254	11.2629	0.53154	9.28415	12.0603	11.168	8.07296	6.58807	5.11092	7.66383	6.37133	7.17042	0.526126	0.000197496
Smp_029100	56.5836	44.4934	0.694838	59.8046	74.3988	65.4331	37.4899	46.8103	28.0617	37.8896	46.617	0.70375	81.1593	82.6988	78.6289	46.8212	44.2246	38.1772	44.8913	38.832	51.1219	0.525891	3.92993e-05
Smp_029750	58.7516	50.8504	0.417804	26.5134	40.803	33.1969	21.5332	26.387	13.1775	30.0118	32.3961	0.639395	28.5808	32.0421	31.9927	16.5514	15.8405	14.0535	17.7866	16.9355	17.2162	0.524411	5.51317e-07
Smp_126690	10.8765	7.53675	0.716003	4.2651	7.55288	6.31718	3.31035	4.08715	2.20364	7.57194	9.44955	0.629567	5.78235	8.04656	7.19273	5.33525	3.59765	3.0382	4.74802	4.06158	5.21511	0.523885	1.30121e-05
Smp_175230	21.5557	21.9502	1.21333	28.9161	38.4776	30.1693	14.2673	18.8552	15.1191	4.85974	5.39194	0.657161	11.5907	12.1031	11.7553	6.2048	6.62337	5.93005	7.0374	6.53664	6.84313	0.523662	0.000419545
Smp_047330	7.17656	5.16824	1.36572	4.10604	5.90489	4.09029	1.80503	2.32479	2.11357	8.63461	10.7009	0.707667	11.0521	11.8423	11.3238	6.8949	6.32174	5.61977	7.08664	6.2496	7.67082	0.523402	8.56644e-07
Smp_071380	31.6732	28.7266	0.78163	21.9668	29.481	30.816	13.4426	15.9004	11.3716	66.0724	72.3469	0.574951	80.8947	97.2172	70.3382	51.1826	42.4813	40.2198	54.8927	37.7966	54.2765	0.523032	1.91069e-07
Smp_036780	200.567	181.757	0.666626	111.843	128.507	93.1028	60.3566	71.4814	57.8898	152.238	198.999	0.469251	120.535	139.103	136.137	71.6776	77.6291	60.7157	79.7924	74.1619	93.2046	0.522845	0.000516952
Smp_053390	2116.16	1916.46	0.635059	1476.89	1488.91	1375.25	805.408	899.502	745.972	1564.34	1892.98	0.486816	1524.03	1568.13	1686.52	937.777	804.822	723.658	845.452	853.451	898.279	0.522688	4.31639e-05
Smp_056900	61.6854	69.9235	0.396348	39.7256	59.4899	62.7631	36.9945	48.556	21.61	57.3568	63.8191	0.576556	59.5761	76.4743	68.9023	46.1445	35.1689	30.2991	44.023	38.7924	47.5067	0.522294	3.60498e-07
Smp_163430	83.4626	81.6673	0.701623	65.2935	70.8131	67.3005	38.0951	46.3522	32.3005	48.4062	51.4453	0.575207	52.1217	61.0744	55.6602	29.8857	28.2546	24.8273	33.2621	28.777	30.7085	0.520962	2.19291e-06
SmVG_025656	11.0591	11.0119	0.564296	6.85412	14.6519	18.516	9.21681	12.8154	4.90731	13.4538	16.046	0.485862	17.1976	20.9731	24.5022	24.6322	16.776	13.3614	17.0399	18.2545	21.1459	0.520161	0.00297776
Smp_047740	79.4086	69.7644	0.433992	92.006	99.34	80.1677	55.4422	65.4559	48.365	70.906	74.7112	0.464394	120.797	136.115	102.378	66.7651	62.7477	61.0738	76.7569	55.9844	69.4993	0.520004	6.77441e-08
Smp_059480	1876.15	2871.45	1.89043	1131.62	1268.8	1480.36	368.605	485.527	546.087	3268.78	3227.16	0.504026	2359.25	3208.99	2708.79	1613.3	1673.64	1174.36	1865.42	1437.75	1573.52	0.518154	3.73942e-07
SmVG_000644:Smp_052850	103.318	99.6199	0.582727	84.2762	126.944	103.258	55.9898	72.1543	41.2044	40.1213	47.0442	0.538829	68.1399	74.32	69.4846	36.5821	39.0739	32.3447	40.7984	35.5224	43.0672	0.517894	2.17879e-06
SmVG_000644:Smp_196620	103.318	99.6199	0.582727	84.2762	126.944	103.258	55.9898	72.1543	41.2044	40.1213	47.0442	0.538829	68.1399	74.32	69.4846	36.5821	39.0739	32.3447	40.7984	35.5224	43.0672	0.517894	2.17879e-06
SmVG_024453	9.95727	10.2445	0.856927	23.0253	22.9985	20.3856	11.4796	12.7495	11.0442	7.01447	6.47708	0.369026	23.1576	24.5768	30.2845	14.7052	13.6307	10.9069	13.3211	15.3947	17.5036	0.51736	0.000382576
Smp_014290.1	34.8709	35.0626	0.69392	31.2944	30.693	30.7268	15.2006	17.7127	15.6074	41.6373	55.943	0.491024	49.664	51.7888	55.0285	32.8117	28.6962	24.452	28.787	29.4916	35.2038	0.516994	2.19145e-05
Smp_067420	92.2807	79.2893	0.461886	45.9676	65.3379	48.596	31.9403	37.2248	21.4203	65.6871	60.4729	0.521013	48.4872	67.1576	61.0223	30.3122	29.3603	22.0062	34.7699	29.9715	29.7353	0.516003	5.3338e-07
Smp_064360	166.557	162.242	0.53119	107.251	125.015	106.918	68.744	83.5256	56.8817	133.571	135.029	0.510103	106.808	146.041	120.199	68.8591	70.3937	54.8607	83.5251	68.1207	74.5467	0.515731	2.45317e-09
Smp_165180	64.2199	61.1241	0.776838	7.72592	23.593	22.6518	26.0648	25.8764	20.1479	52.6863	101.383	0.583367	15.4545	20.6773	16.6424	40.4214	32.4263	22.9056	30.3199	32.4428	43.6214	0.515017	0.00592736
Smp_163260	63.4864	59.3251	0.40686	40.4822	53.7812	49.5166	29.2966	33.241	20.8632	69.7034	65.9227	0.49862	63.0295	84.2037	72.0322	44.1185	38.6687	31.4645	47.2217	39.8085	43.6445	0.514644	3.489e-09
Smp_055400	47.3532	48.2068	0.441878	68.4368	88.3919	76.5384	40.9655	52.6061	32.7183	28.5016	26.954	0.367697	60.4195	73.6569	62.0926	34.2852	35.8502	28.0831	39.7605	31.5144	37.9554	0.514547	3.55462e-07
Smp_140950	51.6359	51.5852	0.5145	40.4162	53.9554	38.1863	29.1984	34.01	21.7742	46.552	44.3309	0.519473	54.7475	71.6933	60.6141	35.6233	33.5271	28.157	41.2673	34.313	35.878	0.514346	2.15031e-09
Smp_044770	127.8	127.652	0.832124	85.4486	92.5702	71.2125	36.0733	45.3273	40.3823	99.1208	103.411	0.513578	81.6012	101.679	97.6206	51.3316	44.6992	37.1877	53.6163	47.9246	50.2509	0.514226	2.46274e-07
SmVG_001224:Smp_091380	36.4417	33.1129	0.373268	22.6207	31.2624	25.6163	16.4547	21.0782	10.864	28.8865	29.6995	0.540364	27.2587	36.0236	30.2943	17.3706	16.3895	12.7964	19.4757	15.4876	17.7389	0.513198	2.10841e-09
SmVG_001224:Smp_091390.1	36.4417	33.1129	0.373268	22.6207	31.2624	25.6163	16.4547	21.0782	10.864	28.8865	29.6995	0.540364	27.2587	36.0236	30.2943	17.3706	16.3895	12.7964	19.4757	15.4876	17.7389	0.513198	2.10841e-09
SmVG_001224:Smp_091390.2	36.4417	33.1129	0.373268	22.6207	31.2624	25.6163	16.4547	21.0782	10.864	28.8865	29.6995	0.540364	27.2587	36.0236	30.2943	17.3706	16.3895	12.7964	19.4757	15.4876	17.7389	0.513198	2.10841e-09
SmVG_001224:Smp_091390.3	36.4417	33.1129	0.373268	22.6207	31.2624	25.6163	16.4547	21.0782	10.864	28.8865	29.6995	0.540364	27.2587	36.0236	30.2943	17.3706	16.3895	12.7964	19.4757	15.4876	17.7389	0.513198	2.10841e-09
Smp_101240	25.6103	23.7478	0.60144	21.2347	27.9263	20.1066	15.5418	19.2137	11.8126	18.2476	21.7275	0.485953	24.4596	28.3459	26.0993	16.6836	15.4106	12.9754	16.9821	15.2279	18.399	0.512112	2.48837e-06
Smp_072090	13.691	9.21088	0.463915	9.05496	14.9899	11.9578	7.29099	9.71939	4.52589	10.1294	11.7444	0.433233	13.0154	16.1617	15.8806	9.27867	8.37317	6.51587	8.94659	8.4117	10.4261	0.506812	3.2773e-05
Smp_021790	14.4281	14.9399	1.37283	16.4504	18.2603	12.805	6.85226	7.48944	8.84483	15.6842	16.6068	0.623139	25.1076	29.4286	25.9654	16.8506	14.6667	12.8199	16.9814	14.4455	17.7707	0.506688	4.76471e-05
Smp_000510	11.9007	9.89282	0.922499	10.6202	16.3016	11.4408	5.20293	6.5784	5.51194	11.764	12.8381	0.434544	21.0212	28.0502	21.1422	13.3924	13.0676	10.1952	15.5771	11.2592	15.054	0.506141	3.16408e-07
Smp_131970	68.0545	63.7206	0.491438	35.1694	46.2463	40.4974	26.0217	29.9129	18.2432	68.5915	69.7215	0.528638	59.4873	70.5014	60.713	34.3529	34.1143	29.5268	39.6023	32.4005	36.2263	0.505919	1.49761e-07
Smp_052140	12.1233	10.1048	0.757387	10.1741	16.0869	12.9441	7.36824	8.22627	5.04633	10.5085	10.1044	0.710001	14.8243	19.3082	15.6508	9.73582	9.09422	7.22034	10.7751	8.27933	9.43777	0.505169	3.02706e-07
Smp_185370	137.293	88.7011	0.629182	121.174	203.599	247.398	95.1897	107.774	59.4822	88.3977	139.541	0.427861	158.173	170.502	216.501	142.107	108.263	78.4667	100.07	115.996	138.382	0.505123	0.0016191
Smp_130630	36.2179	28.5799	0.556779	17.8546	23.0267	22.0203	11.7682	14.0406	8.75076	35.7261	47.856	0.547243	31.9789	34.0706	33.7072	21.4148	17.7391	15.0361	18.6122	17.0114	21.9802	0.504762	1.86588e-06
Smp_035410	56.9872	55.5063	0.635033	39.5064	47.7632	38.0372	25.7136	30.5093	19.0323	49.9147	64.0224	0.723943	54.6997	60.0878	58.4307	32.7232	31.9977	25.7364	32.4857	29.7127	36.5539	0.504271	1.14891e-06
Smp_046870	34.6391	29.8653	0.661355	30.1426	35.8382	33.1281	20.1475	22.7366	15.1594	30.9762	37.4883	0.646992	45.5111	49.6464	46.9763	28.9838	25.906	21.9535	27.5638	24.613	29.5272	0.504192	6.24722e-07
Smp_011720	132.49	117.062	0.459683	72.4157	90.901	67.996	47.377	60.0342	37.4766	234.188	256.264	0.507001	209.038	233.298	223.005	124.205	119.044	102.817	129.755	120.199	126.84	0.502944	1.65132e-06
Smp_077590	20.8851	20.7569	0.910259	17.4087	20.7188	15.9662	10.3982	11.9425	9.01061	17.7838	17.7949	0.677052	19.4576	27.094	20.2925	12.3298	11.8687	9.7949	15.455	11.1314	12.8466	0.501969	6.27372e-06
Smp_001080	118.876	138.35	0.852997	94.1025	83.2784	82.8038	43.824	45.7829	50.5953	168.152	215.42	0.453709	183.797	171.964	182.203	108.203	116.484	95.6053	100.338	102.821	118.477	0.501329	0.000442816
SmVG_019980:Smp_078230	16.6684	17.0795	0.409738	8.35355	12.367	9.81711	6.96314	8.25614	4.26757	15.459	14.2956	0.551213	12.0967	17.26	13.8596	7.89842	7.69004	5.90765	9.68618	7.35563	7.89623	0.500699	1.075e-08
SmVG_019980:Smp_080850	16.6684	17.0795	0.409738	8.35355	12.367	9.81711	6.96314	8.25614	4.26757	15.459	14.2956	0.551213	12.0967	17.26	13.8596	7.89842	7.69004	5.90765	9.68618	7.35563	7.89623	0.500699	1.075e-08
SmVG_019980:Smp_080860	16.6684	17.0795	0.409738	8.35355	12.367	9.81711	6.96314	8.25614	4.26757	15.459	14.2956	0.551213	12.0967	17.26	13.8596	7.89842	7.69004	5.90765	9.68618	7.35563	7.89623	0.500699	1.075e-08
Smp_174370	22.6196	21.4993	0.427259	9.79039	13.7489	9.12894	6.54939	8.29423	4.97211	28.1612	32.5091	0.514926	24.7566	27.2324	24.1103	13.1452	13.2053	11.3073	13.9815	11.7527	14.9349	0.500036	3.35968e-07
SmVG_015133	14.0309	5.86673	0.996188	22.768	42.7943	50.8798	23.3164	28.4332	17.1386	5.43564	8.83398	0.626193	28.5626	33.8829	40.2365	45.3717	29.1547	23.7526	29.9421	31.9845	40.5514	0.499988	0.00308864
SmVG_016806:Smp_053780	18.5191	14.0104	1.17408	25.3041	26.8088	23.2176	10.5136	12.5705	12.9134	8.18526	12.5257	0.717456	21.2045	18.6521	22.9711	11.1243	11.445	10.2167	10.2003	11.9845	13.2765	0.49937	0.000522878
SmVG_016806:Smp_053790	18.5191	14.0104	1.17408	25.3041	26.8088	23.2176	10.5136	12.5705	12.9134	8.18526	12.5257	0.717456	21.2045	18.6521	22.9711	11.1243	11.445	10.2167	10.2003	11.9845	13.2765	0.49937	0.000522878
Smp_012980	129.308	132.398	0.70291	76.3898	106.638	98.4237	52.6921	59.9286	39.4615	113.975	120.485	0.547486	115.506	140.978	117.24	71.1905	65.429	57.4745	79.3601	62.8903	76.5044	0.49841	6.20859e-09
Smp_032320	151.152	137.729	0.706338	124.079	149.936	138.505	84.0827	107.412	64.3078	117.947	145.432	0.699381	147.797	179.241	172.739	103.517	92.2363	74.9435	102.404	93.7041	107.754	0.498315	9.89478e-08
Smp_093100	39.8377	35.7632	0.612145	52.8193	60.2656	57.5302	34.7349	45.0756	28.4375	60.7649	72.5878	0.644313	71.3706	84.9874	81.1456	50.3539	42.2763	34.7454	47.1596	43.0751	48.7047	0.498227	5.73771e-07
Smp_036920	50.1612	48.9499	0.399965	46.9232	57.7312	48.5804	28.4188	37.1538	22.7727	52.5704	69.421	0.577971	75.1301	81.1469	93.778	47.7212	50.2136	37.1435	46.1037	49.22	53.8563	0.497644	0.000846316
Smp_062260	92.7154	98.1743	0.355286	50.966	63.9119	53.6697	36.3018	45.1731	26.4313	121.493	119.961	0.461835	104.166	124.774	108.293	63.7557	62.3583	51.225	70.069	58.3996	67.0686	0.497186	9.55387e-09
Smp_123170	8.52414	6.27001	0.934114	13.0222	16.709	15.4957	6.73063	8.20757	6.58198	7.21547	10.4372	0.815128	16.6546	19.936	20.5666	12.4928	10.3546	8.09366	11.0087	10.8001	13.0222	0.496145	5.11712e-05
Smp_084620	66.1196	57.9509	0.796712	59.2227	66.8122	61.9276	30.9496	38.6764	30.3381	30.7854	36.2235	0.584763	45.2725	45.3329	44.9926	24.1339	24.1433	22.0781	25.1471	23.9275	27.098	0.495208	1.52486e-05
Smp_120630	9.81547	9.43429	0.699899	84.1306	101.45	85.7861	56.1978	65.7909	43.8648	7.29073	11.344	0.606324	108.318	117.677	105.689	60.7112	63.6606	53.4853	67.1898	57.0974	67.8174	0.494688	4.29612e-06
Smp_019690	134.054	139.413	0.454397	96.1285	107.207	113.693	69.508	80.0428	49.2363	268.433	300.594	0.522246	258.671	319.7	285.956	152.221	146.312	122.001	171.843	147.667	166.86	0.494133	1.14336e-07
Smp_048970	24.6375	21.4456	0.580397	15.1041	19.9077	16.9177	11.4933	13.0593	7.84241	20.5126	23.2599	0.660628	21.0242	26.1921	21.9538	14.7279	12.4876	10.4205	14.8325	11.8949	14.6058	0.493767	2.3646e-08
Smp_091300	191.182	189.984	0.625002	167.621	164.223	146.857	86.5029	104.856	85.2513	151.726	155.087	0.423634	166.063	185.201	192.87	100.128	97.7949	80.6473	102.769	100.953	94.0043	0.493666	7.13139e-05
Smp_118220	74.3863	63.5865	0.854216	66.8809	68.8511	61.6372	35.5201	41.4372	33.5084	57.379	80.4732	0.624153	93.1043	86.5099	95.8752	48.2549	53.7692	44.6919	47.3343	49.9279	56.1002	0.493327	0.000581328
SmVG_006671	6.60122	4.19177	0.650665	3.03721	5.6699	6.5113	3.20921	3.72503	2.33067	10.5738	13.363	0.56758	10.5573	12.2191	12.4564	11.6846	8.48888	7.04629	9.26235	9.21622	10.5417	0.492447	8.19805e-05
Smp_181290	15.0696	14.3913	0.454691	16.4915	22.7313	18.6045	11.5656	14.5988	8.55973	12.8964	12.1474	0.539456	21.1461	22.9026	18.3266	13.4034	9.9256	10.4555	13.1141	9.75601	12.1734	0.492399	4.3944e-05
Smp_142780	12.652	10.5812	0.494442	7.0289	11.3824	7.42906	5.27423	6.58454	3.65954	10.3336	8.77184	0.531681	9.8992	14.5622	9.50841	7.00284	5.48909	4.96448	8.27275	5.27552	6.21404	0.492012	1.35027e-06
Smp_074470	400.341	396.998	0.614883	294.307	259.962	256.976	146.689	175.286	151.515	194.829	237.637	0.458504	194.968	188.601	196.137	104.586	103.806	96.4401	106.046	104.346	117.804	0.491805	0.000165644
Smp_019820	4.49086	5.0596	0.866556	3.55659	4.73521	4.53335	2.25784	2.74646	1.65499	6.52862	8.08446	0.716458	8.85816	10.4773	9.81072	5.44084	5.20203	3.94676	5.4563	4.82345	5.72401	0.490475	1.35769e-06
Smp_002550	236.56	198.467	0.684897	291.448	349.747	308.179	181.687	226.722	153.368	157.715	186.914	0.640055	328.775	359.069	322.178	199.788	204.809	166.254	206.311	183.197	225.803	0.490376	1.17472e-06
Smp_065650	76.0541	74.3953	1.03511	59.3376	60.0617	45.0294	19.5084	27.3047	30.3112	31.5787	35.3475	0.455127	36.9064	37.0765	37.7237	19.2117	20.6879	18.2569	20.5195	20.3248	21.0648	0.489498	0.00037347
Smp_174850	10.3534	10.4709	0.845885	13.6823	13.8259	13.2027	6.60566	7.76226	6.91953	7.99612	9.58807	0.519232	15.6165	18.0746	18.4244	10.3655	8.98043	7.67615	10.2283	9.80495	10.376	0.48911	1.9579e-06
Smp_166320	13.9206	11.5464	0.576957	7.32115	7.85162	6.51066	3.67274	4.90783	3.78292	12.5354	13.7742	0.534675	9.07861	10.7306	9.40263	5.33707	5.40973	4.47433	6.03392	5.02275	6.1672	0.488924	8.38222e-07
Smp_034550	18.814	23.0047	0.762674	11.0928	14.0228	9.92836	6.73108	6.6852	5.33938	154.27	141.125	0.525317	127.831	167.55	99.7387	63.3738	72.9185	60.1732	90.3885	50.4392	75.1986	0.488223	0.000187573
SmVG_008570	2.36648	1.44751	0.708465	1.493	2.62948	1.70217	1.05315	1.19865	0.74057	1.76846	2.07656	1.18641	2.42829	2.97324	3.23397	2.09502	1.46145	1.32293	1.95009	1.81269	2.2674	0.488209	0.00176488
Smp_121460	20.4753	16.4252	0.603699	10.9573	16.0381	9.55217	7.11083	9.6516	5.55234	10.6569	9.73293	0.531967	8.13007	12.2663	9.47835	5.45266	5.18623	3.96269	6.79853	5.00332	5.47476	0.485439	0.000246181
Smp_171770	25.1195	22.8243	0.647617	14.0429	20.3116	15.2514	9.38296	10.5975	7.09214	22.9888	21.7412	0.612354	17.083	26.2649	20.4044	12.683	10.951	8.47502	14.7057	10.9861	12.285	0.484991	6.54175e-07
Smp_029370	4.79738	4.69077	0.764419	4.14541	5.80706	5.66525	3.0013	3.41488	2.15439	4.65986	5.43655	0.692887	6.20612	7.91869	6.71633	4.59825	3.88924	3.11165	4.48314	3.64188	4.51904	0.483246	1.04681e-06
Smp_185340	325.464	309.5	1.08044	250.498	234.927	214.934	113.923	116.974	147.326	190.997	257.125	0.54432	219.678	236.566	267.756	191.271	127.541	129.506	162.348	173.623	198.328	0.483232	0.00177331
SmVG_023173	3.09437	3.02063	0.811517	4.27576	3.71962	3.26521	1.86747	1.96099	2.16387	4.59671	6.00814	0.516918	5.56763	7.52311	8.63573	4.3628	3.70203	2.78083	4.23688	4.57178	4.84479	0.482648	0.000734601
Smp_012750	1498.42	1426.41	0.483486	1226.89	1131.33	1166.47	685.875	824.12	570.381	668.858	879.312	0.448403	747.467	706.847	774.542	401.813	412.288	342.845	379.977	378.838	425.745	0.482327	0.000443313
Smp_070130	68.2091	76.9096	0.750799	43.9535	47.8747	46.7416	24.9896	28.9839	21.0266	42.8586	51.6119	0.543	45.1827	46.6382	41.5124	22.4886	23.4155	21.3358	25.4895	21.016	25.9817	0.481922	6.9221e-05
Smp_149300	18.5579	15.9197	0.531505	7.2474	13.4344	13.0228	6.60531	8.58636	3.66179	21.1546	25.5569	0.56318	17.9722	22.7763	21.3102	15.5198	11.2467	8.72061	12.6253	11.3069	13.4036	0.48191	0.000189767
Smp_164160	41.7145	38.9151	0.318755	34.606	42.816	41.5423	27.6854	30.4911	17.6154	49.1873	48.4292	0.4592	49.0536	68.1674	57.0614	37.1359	32.2091	24.1347	38.3024	30.8262	36.0471	0.48027	6.68478e-08
Smp_121640	11.0711	9.23677	0.434405	11.6221	15.2248	13.0658	8.30004	10.6289	5.89547	9.9593	11.2323	0.528531	14.6837	18.0201	16.1172	10.6327	9.37439	7.12277	10.074	8.47602	10.3262	0.479523	2.20097e-06
Smp_151420	3.76867	4.65634	0.543602	2.36533	2.78253	2.80858	1.67938	1.77196	1.17332	20.3562	17.0972	0.558579	15.9879	23.0051	13.3232	9.03999	9.08659	7.89823	12.8994	7.08044	9.84238	0.479151	0.000141782
Smp_045430	65.2302	66.7313	0.484852	51.9595	54.0619	50.3253	29.3685	33.3997	27.1084	70.0799	70.5374	0.449036	70.4791	89.1101	69.5226	49.9715	41.9964	35.4236	50.4779	37.5723	49.8437	0.478778	6.64413e-07
Smp_144170	6.27245	6.62935	0.675969	2.03586	3.92592	3.36379	2.00657	2.16124	1.11237	4.92575	5.24432	0.587605	4.21859	4.75083	3.60268	2.62212	2.3586	2.1747	2.79584	2.03903	2.60312	0.478675	0.000284363
Smp_025100	47.7748	48.2393	0.490732	30.7745	38.9975	32.988	22.6387	26.1128	15.0192	45.3168	47.6423	0.596162	41.569	53.7882	42.1978	26.2851	24.1525	20.0253	29.6046	22.1973	27.5971	0.478193	1.41889e-08
Smp_198190	8.57525	8.5744	0.399696	8.66754	11.5711	10.3362	6.3085	7.52749	4.53335	10.0502	10.7783	0.41914	13.195	16.7744	14.4234	10.0636	8.2414	6.55624	9.38295	7.73506	9.34402	0.477039	5.89901e-07
Smp_077070	34.0552	26.7538	0.615071	20.0697	26.3537	26.0727	12.91	17.1016	9.99531	21.6963	23.2942	0.494815	23.0315	26.3195	26.68	13.641	14.2334	11.0506	14.5596	13.9247	14.4585	0.475728	9.82523e-06
Smp_157680	22.4892	19.7267	0.486017	26.9001	28.8802	27.0328	16.0317	17.7421	12.6592	20.6808	20.7705	0.395265	32.8711	36.297	35.748	18.0474	17.5297	14.8614	19.1602	17.4599	18.2058	0.475105	9.07731e-06
Smp_131990	19.1307	22.9388	0.917481	8.48235	11.8344	8.64107	5.72797	5.80461	4.43802	37.4602	28.3058	0.547041	22.1574	36.9447	24.2247	15.4759	13.7918	10.9544	20.7596	12.9277	13.9393	0.474267	7.7375e-05
Smp_176960	5.78055	5.02798	0.446368	3.66174	5.09569	4.45597	2.7495	3.2753	1.78702	6.11076	6.97894	0.557708	7.021	7.79816	6.03375	4.13901	4.01745	3.37339	4.34821	3.11348	4.44176	0.472619	4.04269e-06
Smp_011570	906.737	784.558	0.519565	830.442	895.931	823.485	539.184	668.422	416.405	830.564	973.93	0.579943	1158.53	1248.14	1240.45	686.034	660.121	562.496	685.206	656.706	704.065	0.471794	6.70612e-05
Smp_003330	57.0302	42.3285	0.893433	41.4875	47.1207	39.0477	18.7548	25.374	21.7232	45.7698	49.0733	0.439775	53.0764	52.2555	50.7521	30.2959	28.8612	25.9164	29.114	26.7146	28.0842	0.471728	0.000623933
Smp_201230	4.75737	4.79385	0.813794	1.90861	4.64186	4.65664	2.89738	3.0544	1.37211	1.69134	1.39859	0.649907	1.14259	1.8883	1.74767	1.89757	1.19828	0.902152	1.6295	1.33636	1.58277	0.471292	0.0139518
Smp_035200	952.816	926.245	0.514963	1010.25	1084.34	934.811	617.882	700.764	513.673	916.379	987.786	0.462194	1173.16	1472.36	1380.41	790.347	759.197	582.069	821.295	753.981	817.978	0.470932	4.44151e-06
Smp_038300	26.6784	25.1007	0.792688	62.5773	57.5454	59.1494	31.6102	34.7785	31.9549	17.2713	21.3074	0.426305	53.1177	56.0671	63.4164	34.3819	32.776	26.4284	31.5341	34.5718	36.2015	0.469406	0.000330838
Smp_167710	46.9225	35.2079	0.615951	44.3735	72.6547	100.779	54.5594	59.7629	30.4234	41.6496	69.2126	0.431652	62.9274	70.5027	85.2674	94.3385	65.9781	50.2966	62.6335	69.8388	88.4366	0.469288	0.00299516
Smp_126460	11.8353	9.61752	0.621438	9.38697	13.3648	12.6367	7.20896	7.62366	4.73759	16.1136	19.7871	0.65842	26.0984	30.5687	28.3509	18.2058	15.6888	12.8204	17.1887	15.1186	18.3509	0.468204	3.38367e-07
SmVG_000380	120.151	136.956	1.18537	252.229	213.371	205.326	90.4025	110.744	146.15	44.9396	54.4103	0.550273	134.593	134.86	153.52	89.7016	83.165	74.5105	82.0866	92.5304	82.4296	0.467154	0.00122682
Smp_091170	49.7708	34.1736	0.789751	50.5885	61.7488	54.3238	31.3374	36.6965	26.6866	63.7659	79.3375	0.590251	117.537	126.587	126.274	72.4505	76.4957	60.2686	72.9609	71.1082	82.2543	0.466466	0.000127423
Smp_140290	93.2275	83.7054	0.555454	66.3163	80.0424	68.4261	38.0882	46.5823	32.8532	86.4447	90.7764	0.417924	87.476	102.612	95.5903	53.5499	51.3443	41.9415	56.6534	49.5534	51.7481	0.46334	1.0353e-05
Smp_158610	13.8646	16.1451	0.814464	6.23921	9.64429	8.2094	4.52815	5.05192	3.16414	11.5627	12.0052	0.534384	9.30325	11.8987	8.86152	5.84305	5.32804	4.51416	6.59508	4.63662	6.27625	0.461608	5.1603e-08
Smp_202500	11.4144	9.81247	0.45777	9.94982	13.4356	14.3333	7.36246	8.62058	5.11909	11.1137	14.4658	0.440972	15.9149	18.3019	17.8822	11.6486	10.2356	7.87419	10.2803	9.69267	12.2668	0.461599	8.54179e-06
Smp_083740	131.047	133.57	0.557773	83.9928	100.642	80.1325	58.6741	65.2713	46.089	211.108	209.868	0.536194	176.112	243.183	185.788	116.822	111.375	90.8129	141.955	104.445	122.044	0.458929	3.18459e-07
Smp_073570	17.5718	16.8545	0.662321	17.1857	17.4716	17.0425	9.53508	11.4292	8.27207	15.3424	19.0427	0.56448	20.7422	23.3408	24.9333	12.8112	12.3981	9.76866	12.6357	12.8394	13.4562	0.458621	7.09782e-05
Smp_141630	80.292	68.323	0.306228	45.2293	81.0581	73.4802	44.8678	50.2386	21.6769	64.4466	77.2988	0.46362	75.0424	93.3362	84.3261	52.2158	46.1254	34.5974	49.3987	42.0628	54.3566	0.457735	5.51694e-06
Smp_017430	3244.89	3985.13	0.669178	1877.58	2287.2	1972.42	1038.1	1281.94	885.015	3890.22	3310.32	0.452186	3065.16	3975.82	3468.74	1814.85	1664.5	1395.84	2103.35	1695.46	1667.73	0.457598	9.46749e-05
Smp_133940	21.6755	17.9378	0.472486	19.3141	23.7911	20.1675	12.2714	14.65	8.96743	22.5415	21.4917	0.491644	29.8417	35.6497	29.6358	17.3121	17.4174	13.9783	19.402	14.7295	16.7614	0.457353	1.21591e-06
Smp_003630	78.184	69.418	0.356071	40.3278	54.6849	44.1114	31.2564	38.3936	20.3863	61.5154	64.3669	0.489845	48.35	63.6877	54.3963	31.7934	31.383	23.3584	35.2142	28.5396	32.7409	0.456613	4.82102e-08
Smp_018400	15.5517	13.4491	0.564993	12.0693	16.7934	14.1065	7.70951	9.32315	6.21394	11.5087	11.9912	0.508419	13.8418	18.0013	14.4485	9.24983	7.92463	6.79291	10.0482	7.58529	9.58566	0.45608	4.1981e-07
SmVG_033635	32.647	30.4576	0.379222	25.1053	31.4129	27.9522	17.3953	20.3336	12.6037	31.6041	39.7854	0.580468	42.6017	44.9485	45.7838	23.8557	24.1087	20.5069	24.6529	23.6157	27.2399	0.455958	0.000135791
Smp_025260	7.72074	6.92906	0.734352	7.53522	7.81794	8.57821	4.14417	5.20318	3.80292	6.42523	7.73478	0.477064	9.1963	10.0828	9.79899	6.36081	5.9542	4.3069	5.59395	4.9364	6.5859	0.453587	0.000679537
Smp_083930	142.372	149.821	0.553313	114.045	139.552	114.25	69.2912	88.0558	59.1935	157.931	157.452	0.412406	177.248	221.805	177.331	120.034	114.197	89.194	126.088	96.3451	117.937	0.452168	2.26388e-07
Smp_124150	51.7948	31.7103	0.524205	49.3372	92.4202	113.269	60.2393	70.4846	34.029	38.0388	57.5512	0.367295	62.0922	70.8969	92.5838	91.282	68.938	48.9131	63.5529	72.4385	86.6563	0.451675	0.00249431
Smp_194580	66.6791	65.403	0.475659	31.1115	45.9034	31.0584	21.5825	26.4955	15.7546	62.0962	61.6317	0.460099	48.3672	62.7766	45.8673	28.6561	31.0359	23.2538	34.3826	24.0454	31.7103	0.451338	9.00267e-07
SmVG_022300	11.8792	8.129	1.05832	4.44725	7.6141	6.86221	2.57152	2.99636	2.31258	7.35171	6.6374	0.484806	6.23312	7.11245	6.70863	4.81803	3.18448	3.33913	4.30723	3.89558	3.60165	0.451242	0.00633962
Smp_074330	10.7926	10.0434	0.756847	10.1268	12.0071	11.0694	5.40748	6.76977	5.16848	8.49247	10.3693	0.423962	13.9768	14.8274	13.6974	8.72027	8.55246	6.8714	8.40599	7.31914	9.23465	0.450292	1.20176e-05
Smp_006690	32.2879	30.4477	0.56895	17.395	20.3292	16.3786	10.8388	12.0414	9.13798	30.8931	32.4621	0.442498	20.9136	28.0944	23.902	15.8798	14.4685	10.7146	16.4535	13.4153	16.1458	0.450011	3.57909e-07
Smp_009300	3.00742	2.65038	0.447816	1.1086	2.42924	1.92961	1.26009	1.60217	0.610288	2.15606	2.28493	0.460605	2.01424	2.56658	1.8337	1.89703	1.46052	1.22992	1.72555	1.26565	1.84711	0.449184	3.00877e-05
Smp_063760	8.94156	6.736	0.643176	6.53212	9.59998	8.56222	4.18105	5.35286	3.21135	6.14704	7.01251	0.567981	8.54541	10.1517	8.52994	5.52642	4.50913	3.82753	5.23062	4.10239	5.04886	0.447242	7.70241e-07
Smp_175740	734.323	639.293	0.56616	913.647	864.435	821.664	473.972	565.659	456.995	356.724	412.642	0.401509	642.259	604.185	612.255	327.707	346.375	306.753	329.45	317.652	356.998	0.446768	0.00119645
Smp_029230	6.53149	7.16051	0.508883	7.43286	9.25392	7.98544	4.5735	5.89325	3.92189	4.71547	5.60268	0.470794	10.6992	10.1152	11.2792	6.36688	5.81996	5.40407	5.8391	6.22683	5.98895	0.446436	0.00190861
Smp_053550	28.1435	23.6389	0.383161	23.8781	32.9024	25.9814	17.0565	21.7951	12.4557	25.7891	30.9892	0.418615	44.5057	49.3073	40.4292	26.1128	24.6762	22.3446	27.9193	22.1528	28.9491	0.446067	2.23699e-05
Smp_079000	100.148	105.087	0.936916	62.9762	67.202	55.4461	29.1785	30.542	31.9266	162.989	171.799	0.444999	127.479	158.799	159.633	88.0317	80.5114	61.9991	87.3724	84.4193	83.6669	0.444907	1.84412e-05
SmVG_015711	1.41447	2.44081	1.40835	1.40062	1.46228	1.7517	1.63583	2.06889	1.05003	1.32783	2.52289	0.895207	3.79333	2.86912	3.55508	3.31576	2.52957	2.30714	2.25745	2.55736	2.83289	0.444849	0.0255536
Smp_024360	20.5379	19.8865	0.391452	15.9575	22.376	23.3882	11.8308	15.1053	7.93043	14.2527	15.9805	0.408904	17.9139	22.1216	22.0932	13.326	11.6253	8.5163	12.1704	11.325	13.0487	0.44255	1.35729e-05
SmVG_020139:Smp_051110	6.09522	5.48024	1.05358	7.29984	7.765	6.98182	4.46175	4.66291	3.88063	5.03775	7.03735	0.715615	10.747	9.8819	10.9561	6.68351	6.477	5.40254	5.71137	6.09739	7.08853	0.442548	0.00082744
SmVG_020139:Smp_051120	6.09522	5.48024	1.05358	7.29984	7.765	6.98182	4.46175	4.66291	3.88063	5.03775	7.03735	0.715615	10.747	9.8819	10.9561	6.68351	6.477	5.40254	5.71137	6.09739	7.08853	0.442548	0.00082744
Smp_091230	59.033	61.5477	0.876431	164.398	165.577	144.478	82.1625	99.8846	88.0937	33.6481	41.9729	0.653316	162.734	162.412	171.251	97.0957	108.635	83.5364	93.7373	96.285	103.601	0.442313	0.00122204
Smp_153170	10.6875	11.4213	0.85166	5.27559	8.29223	7.59695	3.74182	4.16304	2.71818	45.0051	62.839	0.487037	43.7703	50.7385	50.1296	36.7741	30.7255	21.5214	28.3514	26.5372	35.6246	0.441818	0.00209869
SmVG_023767	82.5061	66.0272	0.565754	82.5302	99.4957	86.9672	50.684	62.6476	38.7824	72.8997	81.8763	0.522426	97.5785	140.062	132.165	76.4778	68.3274	45.6524	76.33	66.122	71.9948	0.44148	1.9899e-05
Smp_006390	1127.09	1193.56	0.784684	1002.72	918.909	919.8	491.891	547.402	555.143	1063.81	1248.2	0.35685	1114.38	1196.03	1264.13	742.002	732.119	589.062	703.277	739.924	770.221	0.43961	0.000842501
Smp_179910	109.621	104.693	0.821428	98.5866	132.129	78.495	48.467	52.2653	47.1654	79.5938	85.5725	0.461301	105.087	129.881	106.188	63.1848	62.7162	49.4795	70.6592	53.0098	63.571	0.43942	4.84502e-07
Smp_007890	90.7069	99.2706	0.541015	81.606	91.7268	76.346	43.8946	52.1496	39.803	99.3547	106.274	0.364445	121.74	138.148	118.886	72.7137	69.2642	57.9522	75.6261	59.9825	73.1904	0.439052	0.000182071
Smp_031920	22.6958	18.3885	0.545471	16.6826	19.3149	18.4745	9.56968	11.4864	8.03174	21.2828	25.0497	0.441166	21.9508	26.9352	26.8511	15.5562	13.4729	10.2244	14.5007	13.6233	15.4514	0.437556	5.95064e-06
Smp_058990	74.4545	64.1589	0.3965	44.0708	55.0593	50.097	33.3336	35.5778	22.733	66.9242	82.7413	0.423973	65.2779	69.9868	59.7277	39.4315	36.673	31.2587	38.3588	30.5378	43.3631	0.43695	0.000302653
Smp_000980	283.171	275.401	0.572165	183.976	204.431	161.188	96.0168	118.644	84.0914	251.86	229.76	0.43192	193.211	263.259	214.114	115.708	118.845	85.4725	136.138	100.895	112.163	0.435369	1.27774e-05
SmVG_024938	19.6277	13.0251	0.414804	39.4768	56.0083	48.9151	30.4238	37.0061	20.1345	35.9746	51.1498	0.691022	99.4881	121.094	129.352	74.3362	68.8256	49.1349	68.0958	69.4614	75.8781	0.434679	0.000159987
SmVG_016093:Smp_212920	140.05	130.208	0.472463	76.9938	90.3967	77.182	46.9515	58.0136	37.9819	117.902	135.832	0.444599	97.0083	112.7	97.9175	56.7331	56.2434	46.5034	61.9654	50.1856	63.95	0.434168	1.13303e-05
SmVG_016093:Smp_212930	140.05	130.208	0.472463	76.9938	90.3967	77.182	46.9515	58.0136	37.9819	117.902	135.832	0.444599	97.0083	112.7	97.9175	56.7331	56.2434	46.5034	61.9654	50.1856	63.95	0.434168	1.13303e-05
Smp_174720	82.2618	96.1801	0.87992	101.78	102.876	93.4569	45.5769	56.3281	51.6833	65.0688	73.719	0.507501	114.722	118.562	120.223	66.5758	65.5505	55.7416	66.3185	63.1668	65.7325	0.433543	0.00041423
Smp_175910	114.788	103.028	0.552034	66.8947	94.2452	70.8804	44.5715	55.9428	32.0041	84.8585	85.9849	0.48283	78.0365	102.682	84.6945	52.5608	48.5649	37.3149	56.0633	43.6077	49.8601	0.433502	5.96416e-08
Smp_043100	35.6764	30.6811	0.718203	21.5253	26.8726	20.9924	13.1708	15.8594	10.9054	19.4359	19.9932	0.536083	17.9941	22.5165	21.0044	12.2013	10.8482	8.74809	12.5359	10.9883	11.5699	0.43324	4.07476e-06
Smp_104580	68.166	49.6355	0.406522	59.6248	88.851	68.5232	41.2375	44.6963	26.8002	32.1323	33.0878	0.471562	56.3449	67.5939	54.7936	30.2272	33.1947	24.1301	34.1639	24.9772	33.6189	0.432044	7.38431e-06
Smp_072380	162.691	165.182	0.542657	150.236	153.194	141.356	86.5995	101.029	81.851	192.235	229.798	0.452753	263.863	264.326	259.663	151.773	167.818	135.851	152.368	147.002	164.823	0.429934	0.000512411
Smp_055960	91.2038	80.6568	0.44079	56.6186	72.8098	57.433	36.4568	47.1412	28.3708	79.1984	82.5661	0.445475	74.0622	93.0004	78.8777	47.4772	46.9555	35.6542	50.8404	40.8416	46.5941	0.429449	9.76995e-07
Smp_010110	8.09186	7.21991	0.404321	6.01482	8.28108	6.74049	4.47117	5.48897	2.89755	6.91569	8.35693	0.476123	9.44472	10.903	10.7906	7.11054	6.00677	4.79172	6.22011	5.92094	6.87219	0.429443	2.32605e-05
SmVG_016550:Smp_138700.1	21.9101	19.5204	0.417887	9.20656	15.6049	14.0984	9.7277	11.3135	4.57893	17.0522	18.0104	0.439579	11.406	18.2264	14.6871	10.4055	8.64813	5.50272	10.0943	7.66971	10.1309	0.426241	0.000402777
SmVG_016550:Smp_138700.2	21.9101	19.5204	0.417887	9.20656	15.6049	14.0984	9.7277	11.3135	4.57893	17.0522	18.0104	0.439579	11.406	18.2264	14.6871	10.4055	8.64813	5.50272	10.0943	7.66971	10.1309	0.426241	0.000402777
SmVG_016550:Smp_138710	21.9101	19.5204	0.417887	9.20656	15.6049	14.0984	9.7277	11.3135	4.57893	17.0522	18.0104	0.439579	11.406	18.2264	14.6871	10.4055	8.64813	5.50272	10.0943	7.66971	10.1309	0.426241	0.000402777
Smp_198870	15.7648	12.49	0.516614	8.50915	15.0593	14.8649	6.91721	8.21038	4.2423	15.4876	17.4437	0.396443	18.0417	21.6926	19.8303	14.2697	10.9345	8.73337	12.0494	10.1807	12.7425	0.42484	3.45937e-05
Smp_066610	211.979	195.943	0.617779	156.706	168.843	137.417	96.7529	109.262	80.1968	160.6	152.134	0.477403	158.856	190.951	158.085	88.6639	94.5451	78.0387	105.525	83.8935	94.1232	0.423939	0.000159505
Smp_066480	48.5999	49.8102	0.753255	26.3065	38.2036	27.4593	17.7921	21.545	13.2859	34.3923	40.1218	0.474734	31.9496	42.5161	34.8792	20.7926	22.9773	15.8142	23.962	18.674	24.3141	0.42358	0.000252231
Smp_165400.3	18.2175	15.8147	0.694033	7.61102	14.1008	12.0878	5.64031	9.21709	3.95353	10.1979	13.212	0.546404	8.67923	11.3241	10.1328	7.34447	5.90946	4.28372	6.42114	5.44338	7.60812	0.422925	0.000255297
Smp_016890	32.1864	33.0034	0.443366	16.1253	20.1952	17.3944	10.657	14.0852	7.89012	28.5723	30.3797	0.415765	24.4195	27.5287	22.7622	13.9667	14.2301	11.5799	14.8287	11.444	14.5946	0.422279	2.00027e-05
Smp_092380	334.841	330.083	0.643867	212.477	235.294	220.193	123.222	150.041	114.244	319.44	352.1	0.415607	280.143	325.65	317.278	193.783	181.519	144.138	186.572	178.861	189.142	0.421788	4.76849e-05
Smp_073540	267.617	246.466	0.557318	140.838	185.392	140.832	90.0367	121.535	75.3035	214.39	225.387	0.428959	174.758	220.542	195.071	114.355	121.389	89.2412	127.331	107.125	119.184	0.421327	2.74531e-05
Smp_072970	24.5298	24.106	0.397727	24.847	31.9976	22.7073	16.9537	19.3334	12.5842	22.2403	23.0733	0.386267	35.4513	43.8429	38.4682	22.4165	22.578	17.2108	24.3823	20.3988	22.3788	0.421253	1.39419e-06
SmVG_014428:Smp_000140.1	58.9096	51.134	0.735973	31.5081	45.9289	43.8223	29.1769	33.9551	18.8664	42.4813	52.9066	0.67496	44.1943	53.2082	46.9876	32.8741	32.6888	24.7984	33.3123	28.1725	34.4627	0.421202	2.92926e-06
SmVG_014428:Smp_000140.2	58.9096	51.134	0.735973	31.5081	45.9289	43.8223	29.1769	33.9551	18.8664	42.4813	52.9066	0.67496	44.1943	53.2082	46.9876	32.8741	32.6888	24.7984	33.3123	28.1725	34.4627	0.421202	2.92926e-06
SmVG_014428:Smp_187940	58.9096	51.134	0.735973	31.5081	45.9289	43.8223	29.1769	33.9551	18.8664	42.4813	52.9066	0.67496	44.1943	53.2082	46.9876	32.8741	32.6888	24.7984	33.3123	28.1725	34.4627	0.421202	2.92926e-06
Smp_202800	138.392	128.569	0.8223	181.611	186.62	168.303	92.2275	116.868	87.1291	77.3911	88.6319	0.59176	157.365	172.595	175.775	101.598	98.6101	76.5512	96.5313	93.9139	97.8526	0.420295	0.000404698
Smp_180040	17.7	14.7824	0.648779	13.9306	17.7669	14.6131	8.62829	10.6414	7.08192	19.2328	20.8912	0.546689	22.4902	30.0457	24.2583	16.5271	14.5476	10.9065	16.729	12.7057	15.894	0.419238	7.61895e-07
Smp_040710	5.50568	3.89024	0.683786	4.93774	5.95199	5.27957	2.76932	2.91344	2.56981	2.57357	3.38003	0.524941	4.82643	5.00229	5.06184	3.53605	2.68228	2.42232	2.86859	2.81383	3.30945	0.419086	0.00442782
Smp_022640	1012.27	949.338	0.40658	870.194	873.499	832.075	505.623	617.889	385.53	453.872	532.909	0.37838	504.922	541.993	576.572	300.27	295.737	223.15	280.641	268.42	285.794	0.417571	0.000687142
Smp_098740	202.388	237.885	0.87042	123.908	128.396	109.791	53.143	65.0929	65.3966	145.439	183.231	0.382025	138.132	134.332	134.18	77.0408	83.9241	69.6475	77.3447	72.7785	87.3809	0.416134	0.00294342
Smp_045750	18.11	17.5814	0.477667	12.7457	18.2521	15.5193	9.75685	12.4595	6.17129	12.9271	16.5306	0.561133	15.7595	19.1472	15.7698	9.65336	9.71957	7.26995	10.1514	7.69963	10.3027	0.415799	1.70437e-05
SmVG_020573:Smp_051060	5.2458	5.25112	0.847083	4.05365	4.18893	2.9692	1.7665	2.27867	2.07634	4.90287	5.56564	0.529146	5.21704	5.62949	5.91878	3.51868	3.10857	2.5515	3.15659	3.16932	3.11582	0.415708	0.000732292
SmVG_020573:Smp_177180	5.2458	5.25112	0.847083	4.05365	4.18893	2.9692	1.7665	2.27867	2.07634	4.90287	5.56564	0.529146	5.21704	5.62949	5.91878	3.51868	3.10857	2.5515	3.15659	3.16932	3.11582	0.415708	0.000732292
Smp_179010	29.5543	30.2106	0.526307	33.7745	45.3697	39.611	26.3996	31.3546	16.8506	15.3719	15.702	0.645008	26.3329	34.635	28.7914	17.7953	16.4672	12.7005	19.2543	15.2661	15.5012	0.415362	0.000245789
Smp_135830	75.8129	81.7618	0.447022	49.5867	63.5643	50.4769	35.6525	43.208	24.7764	87.2045	88.9152	0.524061	87.444	107.031	83.291	50.8852	51.931	41.3611	58.1272	42.7089	51.5404	0.41508	5.00936e-06
Smp_069910	39.6262	31.1509	0.454884	16.5287	30.8206	20.6062	13.9829	17.3521	8.46105	19.6894	21.728	0.434882	21.4746	23.8039	21.6562	12.254	14.0585	10.4433	13.2306	11.5462	13.727	0.414675	0.000391086
Smp_055880	32.0081	34.857	0.372335	32.5098	35.6931	32.2354	19.189	22.5574	15.4881	42.618	38.937	0.341166	54.0944	68.5023	60.4326	33.2169	33.2104	25.1527	36.6465	30.212	30.9739	0.414149	3.83322e-05
Smp_024060	57.2843	44.6717	0.681122	45.1747	56.8116	49.1226	30.045	32.4468	23.1253	50.3064	55.0866	0.511883	76.169	88.0049	78.4446	47.2798	49.0412	38.3313	50.4519	42.4855	49.1463	0.41297	7.3807e-05
Smp_044260	31.611	30.8539	0.682094	16.6513	23.9859	18.9807	13.2704	16.4482	9.30112	36.748	41.9279	0.594891	38.5456	48.0745	44.2807	26.4138	26.1576	20.1742	28.2917	25.336	26.7295	0.412165	3.92422e-05
Smp_094820	22.3331	23.7964	0.564079	18.3337	24.0848	19.2557	12.3424	14.0972	8.62685	43.9948	43.8155	0.502642	53.061	68.4744	56.3451	34.0022	33.5601	24.765	37.049	27.8124	32.4901	0.41042	7.56444e-07
Smp_015840	33.8273	35.99	0.451674	22.5189	28.9182	23.7855	16.7988	19.4045	11.701	29.8095	30.7421	0.437107	28.0185	36.7139	30.4803	19.4912	17.0724	13.8686	20.3881	16.3158	18.9022	0.41023	7.29898e-07
Smp_076230	381.268	343.847	0.54812	306.566	299.656	283.182	164.061	196.064	156.107	338.177	379.761	0.384147	351.113	373.575	330.759	199.093	209.599	170.326	206.242	173.058	209.87	0.409946	0.000180466
Smp_075560	431.467	422.351	0.603412	291.709	295.361	281.872	152.235	183.249	141.137	335.955	368.776	0.390083	314.7	330.045	321.417	189.395	177.565	147.789	179.546	160.601	172.541	0.408199	0.000249202
Smp_166180	11.7124	13.6835	1.04899	6.51082	8.76721	4.95481	2.74155	3.2164	3.42159	24.8996	18.1769	0.348696	18.2857	25.6732	17.4362	11.6797	11.4451	9.22778	14.6926	9.63094	10.6442	0.407836	0.000180328
Smp_094390	5.54402	4.34563	0.511042	2.57876	5.12922	4.8414	2.42314	3.21581	1.59165	4.94002	6.09487	0.354	3.9832	5.25363	5.55839	4.8861	3.59854	2.35824	3.41049	3.44582	4.45647	0.406832	0.0199637
Smp_021760	208.046	185.773	0.48423	166.293	171.666	159.313	95.368	111.435	90.5773	200.167	241.328	0.297087	233.699	248.641	241.732	147.132	148.102	118.193	141.55	135.493	153.983	0.40449	0.000400205
Smp_069840	46.8732	41.868	0.693065	53.3129	62.0033	45.6784	28.5263	33.1984	26.3713	27.0659	32.114	0.422781	55.7073	59.625	54.701	34.4062	33.168	26.6858	33.2187	28.7351	33.5572	0.402058	3.66075e-05
Smp_008120	79.1405	78.8294	0.626815	38.6628	52.5384	38.647	25.0672	29.982	19.5437	77.5721	71.0823	0.398993	55.1151	78.3375	55.4168	35.0314	37.8091	27.0903	43.542	30.1677	36.2096	0.400268	2.77457e-05
Smp_158860	11.8313	10.0404	0.69799	5.14487	8.63508	9.6865	4.31241	5.37147	2.54136	12.7597	15.7455	0.463856	11.1808	15.3814	14.0844	9.90591	8.32587	5.33353	8.46757	7.25915	9.03897	0.398924	0.000758964
SmVG_030894:Smp_064260	36.3944	34.4159	0.425073	27.0435	30.7356	25.2905	16.3902	19.5016	12.8848	25.1433	26.0755	0.421688	26.1138	30.7403	26.5985	15.2065	15.5778	12.174	16.5714	13.3507	14.7433	0.39838	0.000163245
SmVG_030894:Smp_097250	36.3944	34.4159	0.425073	27.0435	30.7356	25.2905	16.3902	19.5016	12.8848	25.1433	26.0755	0.421688	26.1138	30.7403	26.5985	15.2065	15.5778	12.174	16.5714	13.3507	14.7433	0.39838	0.000163245
Smp_201440	139.969	147.994	0.430175	76.9224	86.094	79.6208	52.8056	66.8464	42.379	147.879	144.501	0.406337	112.959	135.727	98.047	71.0869	68.2232	59.6722	79.8511	56.6303	72.2189	0.398246	4.75977e-05
Smp_050280	1968.3	1749.96	0.475269	1545.34	1505.92	1421.01	925.975	1128.28	816.664	723.318	870.248	0.312655	780.043	790.813	806.219	477.065	484.486	398.807	450.746	445.616	496.755	0.398235	0.00235446
Smp_157320	31.0394	28.9617	0.375853	13.3858	18.0918	14.5307	10.6136	12.1454	6.8716	36.792	38.2873	0.412444	23.9606	31.9833	24.209	16.4419	15.2827	11.8324	18.1184	12.9993	17.5738	0.396487	1.13489e-05
Smp_076740	1755.41	1549.03	0.367506	1239.93	1203.39	1281.06	872.99	1126.01	706.17	677.444	918.956	0.343424	688.635	667.587	776.774	469.795	480.016	376.488	396.524	463.669	495.062	0.396447	0.00478271
Smp_038700	20.191	21.7801	0.591075	13.211	15.9947	14.921	8.50518	9.92808	6.47331	22.653	23.2148	0.395726	19.8985	26.2332	22.6644	14.603	12.6683	9.65886	14.4286	11.8643	13.2903	0.395115	1.41602e-06
Smp_018430	7.43266	5.61922	0.795201	5.01631	7.14404	6.42803	3.32993	3.771	2.72058	9.24851	10.1853	0.524939	8.41893	11.1924	10.6661	7.62556	6.25343	4.60775	6.9394	6.1175	7.01202	0.394567	7.32156e-05
Smp_015850	108.168	90.0785	0.949163	78.3823	101.745	90.1724	40.5657	49.6658	38.0972	76.7825	84.5565	0.502302	88.9708	107.251	102.431	61.5853	53.52	41.3246	56.987	51.3773	56.3197	0.394505	1.19452e-05
Smp_064600	50.3503	41.4175	0.932642	28.4486	44.9148	32.3795	22.2938	26.657	15.6376	23.8342	27.4409	0.65831	28.6976	39.5406	31.1196	20.8936	19.4157	15.082	23.319	17.7849	19.8043	0.393875	4.96885e-05
Smp_136640	85.6337	90.9162	0.635638	84.5635	104.396	94.2107	57.6491	62.7463	43.63	81.9386	80.4855	0.480017	125.333	147.971	101.338	73.1852	71.3486	63.206	84.5736	54.7357	69.727	0.389254	0.000163897
Smp_054360	32.2426	29.3649	0.529687	25.235	32.3291	30.4833	16.9785	20.741	12.6475	13.21	14.6969	0.378717	16.7989	19.4524	19.7192	10.3498	10.8668	8.15644	10.7242	10.331	10.9352	0.388123	0.000756976
Smp_006830	35.9246	36.6799	0.795616	45.7246	49.2492	42.3569	25.0586	30.9747	22.9638	28.5418	32.6432	0.492058	46.3384	59.8871	54.1017	32.2648	31.9	22.335	32.9744	28.3772	32.6497	0.386231	6.14176e-05
Smp_196230	60.7119	55.1582	0.56608	54.717	59.2315	44.616	28.2337	33.9169	27.2054	49.708	49.2951	0.286869	63.2464	69.8043	65.5918	36.4743	40.7479	30.0899	38.415	34.066	36.4361	0.386118	0.0018181
Smp_012030	8.60679	8.04399	0.865747	5.61909	7.43722	7.72392	3.94219	3.93653	2.88312	13.8794	15.7109	0.536516	14.5032	18.3645	15.4477	10.342	9.45044	7.22614	10.3267	8.32707	10.2433	0.38561	4.90725e-06
Smp_136320	21.1547	18.1094	0.638607	16.2116	20.685	18.1539	10.0118	12.6582	8.13184	14.8773	18.8315	0.464276	19.5707	21.6307	20.5904	12.5192	12.4594	9.60428	12.1074	10.9025	13.4072	0.384706	0.00027462
Smp_098960	1580.2	1402.17	0.374513	1248.66	1197.04	1233.32	762.408	976.939	643.104	508.308	685.459	0.350149	546.865	546.06	598.688	340.978	320.827	259.693	296.707	306.672	356.6	0.384578	0.00206258
Smp_151180	6.42794	5.36191	0.36009	4.02324	5.31783	4.68053	3.05222	3.62594	1.98669	5.94378	6.4579	0.433523	6.39531	7.27976	7.27269	4.57243	3.86463	3.14661	4.11121	3.77007	3.94598	0.384422	0.000105838
Smp_000240	41.4161	35.7504	0.531007	28.214	37.4966	28.9994	19.3162	23.7774	13.6393	27.1898	29.0539	0.537479	27.1763	36.9077	32.3506	19.0335	17.7635	12.7445	19.9466	16.4415	18.1169	0.380417	1.77794e-05
Smp_179080	7.80464	6.71705	0.479709	6.27842	7.72318	6.60219	4.44281	5.10303	3.21234	6.96458	10.276	0.39391	8.07296	10.9428	9.65154	6.80732	5.70477	4.06794	6.17026	5.20439	6.99821	0.379181	0.00191824
Smp_093830	61.6466	46.4094	0.529907	37.5717	47.4253	45.4126	25.1168	28.9344	18.3199	100.678	117.447	0.44247	88.8679	114.565	113.47	68.4036	62.3822	42.6307	63.5661	58.6455	64.2	0.378565	0.000329362
Smp_006320	8.02545	7.24401	0.371706	5.02889	6.1906	4.69214	3.37331	3.93971	2.47648	10.3102	10.8056	0.359179	8.79105	11.1293	10.3357	7.14537	5.66825	4.27624	6.23899	5.46455	6.08054	0.378236	0.000115101
Smp_046930	212.819	180.437	0.573679	104.414	156.409	152.753	75.3524	83.6472	49.6316	247.741	309.205	0.402868	208.95	262.991	260.962	172.08	138.084	96.4547	138.839	130.13	155.386	0.376541	0.00155459
SmVG_025154:Smp_114280	6.15216	5.68538	0.444944	3.11249	4.27875	3.85699	2.60627	2.89036	1.56694	7.63551	8.32226	0.41908	6.59009	8.04907	6.2904	5.01304	3.97589	3.23312	4.49395	3.32134	4.56303	0.376529	0.000337691
SmVG_025154:Smp_136040	6.15216	5.68538	0.444944	3.11249	4.27875	3.85699	2.60627	2.89036	1.56694	7.63551	8.32226	0.41908	6.59009	8.04907	6.2904	5.01304	3.97589	3.23312	4.49395	3.32134	4.56303	0.376529	0.000337691
Smp_080790	22.1528	24.028	0.832549	11.7081	15.8079	11.6984	5.83784	7.45748	5.70483	20.4949	19.4943	0.33838	18.8296	21.5409	16.9942	12.3982	9.78881	9.01808	11.8082	8.78851	10.4154	0.376411	0.00204905
Smp_122840	576.573	626.55	0.655484	639.507	653.141	649.693	333.414	375.462	309.507	588.219	702.156	0.349785	865.936	980.548	958.939	531.8	550.358	402.435	520.378	479.184	561.476	0.375979	0.00142973
Smp_038680	5.84719	4.03744	0.807371	10.5408	10.7501	9.28934	4.85579	6.06693	5.42467	3.63095	4.46009	0.335311	9.76587	11.1483	11.9889	6.98411	5.91338	4.83786	6.27772	6.36295	6.72019	0.375763	0.0017036
SmVG_015294	50.6203	48.0488	0.570328	58.9983	57.8789	58.9301	34.2674	41.4605	29.787	35.7151	49.5125	0.488069	67.6254	66.0561	74.1928	41.9281	42.0329	32.2685	36.3602	38.6808	43.6583	0.375709	0.0030226
Smp_103210	589.4	527.384	1.02208	323.961	469.63	383.595	165.918	219.812	162.634	110.365	117.744	0.520224	107.259	137.391	125.101	72.2943	71.1773	52.2496	76.8675	66.0951	69.7103	0.375554	6.1289e-05
SmVG_008700	61.5118	58.3775	0.796381	27.6723	34.5324	26.2781	16.1098	17.3189	14.0452	40.8647	52.5035	0.40292	32.1311	35.6795	39.3872	23.4932	20.9289	15.6561	20.034	20.7823	22.0876	0.372715	0.00204335
SmVG_024133	2.28872	1.42413	0.563198	1.2021	2.23683	2.25914	1.32761	1.41726	0.73357	1.70768	2.19501	0.386512	1.93682	2.38767	2.4014	2.19758	1.35595	1.10121	1.57632	1.52098	1.76933	0.371778	0.00895545
Smp_093230	81.2612	80.5105	0.318013	47.0618	62.1915	49.3921	35.4741	42.9153	23.6895	78.9522	69.2577	0.332846	60.6582	90.0333	69.302	45.8058	40.2858	29.1929	49.635	35.7936	41.4023	0.370679	1.00024e-05
Smp_085480	192.043	182.819	0.330961	84.901	136.655	95.3063	71.741	89.6444	43.5756	125.955	120.3	0.379017	96.2906	130.379	84.6389	63.431	65.276	46.9583	72.6382	45.0938	61.9402	0.370389	5.88227e-05
Smp_045260	36.911	44.9398	0.950772	33.419	35.9408	26.2463	18.16	19.5676	16.3843	38.9419	40.2937	0.513998	40.9193	60.6976	44.9706	28.5967	27.846	19.3876	33.0159	23.054	28.7208	0.369569	2.00113e-05
Smp_066630	29.2865	26.4027	0.680233	19.4771	26.4352	22.2531	10.3654	12.7697	8.73354	15.3944	15.9799	0.355639	17.4728	22.7405	20.7043	10.3714	9.90391	6.86337	10.4277	8.59397	9.9996	0.369147	1.19824e-05
Smp_096750	1367.92	1312.53	0.431433	965.01	974.21	955.979	628.997	768.148	492.222	539.045	695.38	0.350029	610.288	555.32	617.805	367.83	356.183	296.551	306.635	329.945	359.844	0.368944	0.00615636
Smp_035480	72.1804	73.1797	0.783715	85.3571	98.4714	87.7674	42.5448	57.1509	42.2294	39.7129	50.7602	0.433887	73.9861	75.0003	73.212	51.5443	43.9706	35.2649	41.0485	37.8313	47.0258	0.367973	0.0003928
Smp_152010	31.678	31.9067	0.571114	18.474	24.3703	18.1423	11.3753	13.8822	9.35819	20.6603	20.4897	0.399602	17.3688	22.4154	17.4802	11.6867	11.3253	8.52196	12.526	9.1489	11.5337	0.366905	6.91208e-06
Smp_052740	22.172	19.131	0.585581	12.4409	17.2822	11.2668	8.88972	9.35873	6.28655	17.8545	15.8818	0.445982	13.0034	19.8524	14.62	8.96402	8.97864	6.31434	11.0835	7.84352	9.28408	0.366634	0.00383504
Smp_083650	32.618	33.4018	0.549649	21.4596	26.4914	21.2593	14.7878	16.2975	11.2442	19.4171	22.3157	0.359186	20.4007	21.8799	19.4601	11.8094	12.6891	10.0757	12.5534	10.4861	13.3382	0.366356	0.00153468
Smp_074770	13.5952	12.2052	0.462958	7.41299	12.4695	11.6054	5.90357	8.58408	3.65836	12.3417	16.8537	0.401299	14.3694	16.6166	17.0281	12.7008	9.63712	6.91349	9.19212	8.78696	10.6131	0.365372	0.00424373
Smp_180000	1150.49	982.754	0.400791	849.688	866.332	854.107	508.006	619.817	403.156	1106.98	1340.55	0.315974	1087.88	1175.47	1259.28	711.801	676.479	507.084	624.46	597.676	688.268	0.364581	0.00374655
Smp_173840	183.721	176.228	0.344823	112.403	142.388	121.683	80.611	93.4349	54.8529	174.362	170.453	0.357447	149.622	188.386	161.897	96.0561	98.2384	70.746	101.897	82.5416	89.1478	0.364208	0.00010554
Smp_097380	302.936	239.639	0.813202	394.042	397.842	352.152	210.647	250.09	209.817	124.414	182.382	0.462107	268.247	274.95	330.308	190.272	175.439	135.142	157.544	181.044	185.156	0.363803	0.00614962
Smp_066890	1920.2	1695.68	0.461061	1386.53	1382.32	1296.36	802.31	1011.46	708.71	863.209	1035.19	0.311087	839.436	908.517	992.79	574.698	563.444	412.486	512.329	532.869	551.744	0.362955	0.00660923
Smp_092280	295.22	265.972	0.45627	203.378	220.435	186.559	112.523	146.218	97.7731	243.301	260.176	0.308442	221.67	264.309	230.104	137.284	143.552	103.123	141.163	118.759	139.734	0.361272	0.000131301
Smp_024030	13.7034	10.5174	0.63071	9.65875	12.9246	11.1685	6.06445	7.99231	4.63906	12.6435	15.234	0.514077	13.2717	17.5716	17.5595	10.5183	9.01902	6.07625	9.14845	8.39356	9.28915	0.360386	0.0017328
Smp_043200	20.3827	19.5289	0.38616	12.0516	17.2891	14.1242	9.6276	11.9198	5.76541	9.99632	8.19186	0.451628	7.78576	12.5808	8.57266	5.18727	5.42566	3.67466	6.79577	4.34693	4.912	0.359644	0.00481238
Smp_183860	42.9042	37.5307	1.123	87.7658	94.2772	101.207	48.9831	56.0114	50.2803	36.7423	46.8706	0.43125	106.796	107.638	126.07	88.5682	80.4995	59.7055	72	73.9284	86.2555	0.359327	0.0036212
Smp_148320	14.0291	13.1944	0.462925	12.6312	15.2231	13.085	7.79812	8.558	6.29525	19.6213	18.8986	0.314884	26.8208	30.6385	23.7658	14.9954	15.1094	12.4913	16.3379	12.1585	14.6417	0.355951	0.000147536
Smp_082860	31.8827	26.9532	0.371985	15.1966	22.7851	19.3614	12.7812	15.4342	7.40769	24.7577	26.0808	0.395876	19.5611	26.1443	21.2285	13.7685	13.3753	9.25309	14.3539	10.8769	13.2722	0.355278	3.06346e-05
Smp_064050	73.9884	65.885	0.363589	41.0746	62.8741	49.3018	33.2999	39.7442	19.227	52.8511	51.4492	0.362209	49.0413	63.8471	56.4957	33.922	30.8597	22.3892	33.8649	27.761	30.0996	0.35447	4.24548e-05
Smp_030280	30.8331	30.8046	0.673876	44.2811	60.7253	51.2097	34.3532	42.4552	24.2724	22.9705	28.5788	0.672263	51.783	62.0063	48.5375	35.7307	34.5097	27.2482	36.3637	28.0973	34.3973	0.353691	9.83686e-05
Smp_025800	31.1972	29.5917	0.565993	19.5829	21.7048	17.9757	11.0093	13.3362	9.70607	24.2671	24.3252	0.401701	20.5334	24.5409	22.0165	14.1298	13.302	9.9033	13.7233	11.5432	13.1313	0.352956	8.29035e-05
Smp_033020	8.92589	7.73222	0.529265	8.22031	10.9959	8.25751	5.63205	7.33091	4.04453	7.20145	8.1637	0.441741	10.8235	13.9636	12.8269	7.94465	7.36553	5.18086	7.7235	6.64076	7.24955	0.352449	9.97596e-05
Smp_072900	739.527	659.204	0.477823	831.479	913.216	856.4	527.426	653.714	427.088	489.958	546.697	0.343274	795.998	863.237	868.062	538.599	523.679	402.135	492.499	476.619	524.779	0.349259	0.00190783
Smp_032760	1550.03	1405.49	0.553694	1162.69	1105.59	1082.95	650.417	841.555	642.926	649.671	821.692	0.286075	650.149	660.701	720.767	443.959	428.1	340.779	384.494	403.923	444.472	0.347241	0.00627744
Smp_092490	55.5258	54.5251	0.679087	36.95	33.2615	30.6873	17.0493	21.1524	18.584	50.664	60.4519	0.351624	43.5017	44.6668	42.2396	27.729	27.6454	21.2623	25.2032	22.5835	27.4558	0.345508	0.00178045
Smp_129420	116.967	94.5894	0.637829	143.937	137.826	132.747	68.3718	84.2295	68.852	86.9064	108.42	0.426309	142.986	160.285	156.275	89.4522	95.6402	65.9081	85.4507	78.261	91.641	0.34218	0.00315282
Smp_158380	62.804	63.1265	0.664776	35.8671	49.2661	45.2087	21.9619	32.6665	18.6352	23.9816	25.5489	0.359275	19.5094	26.2756	21.5733	15.1041	13.2694	9.76026	14.8234	11.7955	14.8851	0.337126	0.000132051
Smp_001830	945.779	910.987	0.397314	1051.97	1059.08	969.699	623.82	743.15	481.977	452.269	530.706	0.252205	660.152	713.823	764.211	449.73	428.779	311.95	387.376	370.67	402.195	0.335093	0.00539093
Smp_095680	22.1363	21.2838	0.798213	29.9943	35.9357	31.2809	20.2987	22.0764	15.8366	19.0743	19.398	0.55027	33.9451	46.7018	41.4731	27.7364	24.5367	16.9757	26.6756	22.7918	23.709	0.330987	0.00453511
Smp_210680	12.241	11.7104	0.721616	9.4595	12.0857	9.77089	6.4885	8.49086	4.5016	13.4586	11.9317	0.555311	15.1069	21.7592	18.8385	11.6001	10.8836	7.21653	11.7029	9.74479	8.79745	0.330065	0.00419441
Smp_140810	3.09572	2.90348	0.88744	2.16563	3.10335	2.76563	1.2273	1.3792	1.04508	3.87982	4.24695	0.326999	4.76916	5.72869	5.46822	3.76607	2.84057	2.32703	3.20808	2.8913	2.98811	0.328152	0.00423973
Smp_121430	128.172	116.919	0.454426	84.0584	93.2274	81.3688	52.0528	64.8503	43.2138	96.1909	97.8679	0.279455	87.541	102.583	96.9691	61.2067	59.5536	43.4636	57.765	52.6679	56.2523	0.328018	0.000606496
Smp_054410	72.8648	88.6874	0.672818	61.9969	65.5301	71.3642	37.6289	44.81	29.05	82.1962	102.979	0.358377	112.178	111.209	109.063	74.566	70.2079	52.334	60.2386	54.1654	64.0295	0.327041	0.00437634
Smp_021080	22.3165	23.5485	0.534087	18.0724	25.3394	22.7456	14.6132	17.432	9.27481	19.0177	21.019	0.410289	22.0332	31.8909	28.7993	18.994	16.4538	10.7868	17.8838	15.3119	17.5343	0.325535	0.00115345
Smp_211140	12.6421	12.4082	0.341646	8.97802	11.6034	10.8267	6.90293	8.1368	4.41893	10.2752	11.4367	0.444657	10.9462	13.4108	11.5939	7.50196	7.76502	5.2307	7.31268	6.03406	7.23086	0.323832	0.000500683
Smp_136740	21.372	18.7402	0.397194	17.3093	23.6314	20.199	11.7373	15.0754	9.08062	20.2088	19.3144	0.352463	24.4537	32.699	20.9588	16.336	15.9512	12.1829	18.5141	11.3318	17.0221	0.321838	0.00227389
Smp_019050	206.57	168.667	0.388818	123.616	154.598	142.547	86.2388	116.673	64.4393	143.765	158.703	0.274632	125.431	157.095	144.117	99.9022	99.8326	62.8033	90.2298	79.2099	90.8794	0.320926	0.00265994
Smp_129760	16.484	12.8546	0.81187	23.5975	32.7587	27.2887	16.6122	20.6175	11.3005	11.4216	16.5314	0.479846	39.8115	39.6366	44.2832	22.866	22.4193	18.5262	20.8683	22.0357	22.8593	0.32032	0.022165
Smp_003990	1374.75	1367	0.635517	707.675	1040.75	925.442	501.149	690.802	374.492	626.015	690.69	0.383262	633.679	734.165	615.29	420.102	427.064	318.76	415.597	336.393	407.987	0.319828	0.000801364
Smp_027250	25.9111	24.8771	0.584314	19.4441	25.7313	19.8505	11.8199	13.8019	9.66338	18.0557	18.8569	0.322556	22.9121	27.362	24.0856	14.3052	15.4575	11.0329	15.1	12.8686	14.0291	0.319728	0.00257892
Smp_012690	28.8031	26.287	0.501725	20.3612	26.8319	24.2171	10.9573	14.0085	8.04466	33.8954	34.5795	0.373377	34.7531	45.4907	37.5157	21.984	19.0523	13.8764	21.2097	15.7307	18.9066	0.319217	0.000132585
Smp_093440	808.656	715.972	0.365365	832.78	901.358	882.399	558.174	686.151	427.739	343.796	422.986	0.288739	524.471	566.021	574.802	362.71	333.76	255.905	311.252	304.554	340.414	0.316722	0.00457244
Smp_042280	23.5422	23.4859	0.350556	13.7526	16.03	16.0727	9.79777	11.6331	6.94386	16.2612	22.8987	0.386309	15.8643	16.7456	16.3165	10.8131	9.9964	7.75197	9.3817	8.47247	10.9749	0.314583	0.00496421
SmVG_030209:Smp_000620	35.2808	33.4788	0.400389	19.2559	22.6441	21.1189	13.3989	15.7696	10.172	39.2128	40.5452	0.286707	29.5966	37.3317	33.5513	23.2636	20.6237	14.8622	21.232	18.2808	20.3759	0.3108	0.000349986
SmVG_030209:Smp_000630	35.2808	33.4788	0.400389	19.2559	22.6441	21.1189	13.3989	15.7696	10.172	39.2128	40.5452	0.286707	29.5966	37.3317	33.5513	23.2636	20.6237	14.8622	21.232	18.2808	20.3759	0.3108	0.000349986
SmVG_030209:Smp_000640	35.2808	33.4788	0.400389	19.2559	22.6441	21.1189	13.3989	15.7696	10.172	39.2128	40.5452	0.286707	29.5966	37.3317	33.5513	23.2636	20.6237	14.8622	21.232	18.2808	20.3759	0.3108	0.000349986
Smp_153750	210.954	202.708	0.5938	160.556	152.864	154.73	91.7877	117.308	84.8737	306.399	377.437	0.294845	291.649	348.244	334.206	229.232	224.67	152.637	205.619	189.686	215.805	0.308931	0.00390625
Smp_066620	60.3744	56.1448	0.640272	54.9643	60.3459	54.9099	31.2428	35.6376	27.8421	53.5407	62.2972	0.485821	70.3832	81.9677	75.0661	47.8509	44.5249	33.4124	44.3858	38.3181	44.9136	0.308524	0.0012096
Smp_211340	20.6805	17.3298	0.603473	12.1803	16.6976	10.3299	7.90459	10.1673	6.05274	21.9439	19.144	0.419602	16.8695	25.973	18.0868	11.3784	12.9698	8.02309	14.2006	9.40129	11.1968	0.308092	0.00750338
Smp_022570	17.2895	17.1833	0.819221	13.3172	17.0834	16.6349	9.7547	11.7026	6.77053	31.2129	41.1963	0.556418	41.3422	51.3023	46.6189	31.0854	29.3684	20.2769	28.6771	24.8739	29.9704	0.306144	0.00121582
Smp_159410	45.547	40.4721	0.695659	34.926	46.4903	40.5071	28.2526	34.2106	23.0768	24.7898	29.0493	0.430554	38.0486	43.4441	38.7734	31.9026	32.0023	22.6331	29.9165	24.4537	30.7619	0.303564	0.00516513
Smp_021040	26.2139	25.3811	0.738621	19.6257	25.5267	21.1172	11.7697	14.6695	9.41941	24.1653	26.7547	0.463602	32.3401	38.842	32.1298	22.2284	21.3371	15.2516	21.5157	16.6887	19.5668	0.302213	0.000414288
Smp_028980	47.5424	44.6616	0.606078	39.5555	49.5232	47.5033	29.868	37.9431	20.3577	28.3537	36.4285	0.528866	40.9586	47.7957	47.0224	30.7669	28.6723	19.8853	26.6438	24.9149	28.971	0.300031	0.0043017
Smp_059800	16.9627	15.8832	0.353974	11.3654	15.172	14.6923	9.1289	11.9741	5.51997	7.54936	10.2641	0.341787	10.2157	11.651	11.2896	7.62909	6.93863	4.84312	6.34511	5.74299	7.42528	0.297132	0.00582069
SmVG_012382:Smp_106050	16.9043	17.576	0.423892	8.68052	10.6021	8.7752	6.0419	6.94859	4.36687	18.7519	19.4589	0.332134	14.4358	17.1837	14.5288	9.96232	9.23636	7.02772	9.62696	7.68972	9.15483	0.296626	0.00038601
SmVG_012382:Smp_106060	16.9043	17.576	0.423892	8.68052	10.6021	8.7752	6.0419	6.94859	4.36687	18.7519	19.4589	0.332134	14.4358	17.1837	14.5288	9.96232	9.23636	7.02772	9.62696	7.68972	9.15483	0.296626	0.00038601
Smp_032250	21.0256	16.9013	0.485399	21.9509	34.9062	31.654	17.2939	20.3031	11.5213	18.4405	21.0194	0.361063	34.911	46.0999	38.9754	28.1727	26.3087	17.5772	26.0132	21.3833	28.5483	0.290769	0.00186822
Smp_030760	5.20618	3.43414	0.439122	3.84556	5.99269	5.32044	2.84423	3.68912	1.86215	5.36869	6.51739	0.305377	8.03054	9.75533	7.31482	5.64443	4.94867	3.73124	5.2184	3.8185	5.33016	0.288041	0.0012482
Smp_170030	14.8983	12.3575	0.832576	10.9853	13.9758	14.8475	6.34552	7.56202	5.5703	43.2285	52.5911	0.278371	48.0353	58.4554	56.9372	41.7579	37.6903	24.201	33.0181	30.543	35.0182	0.286155	0.00770735
Smp_141650	16.8227	15.5912	0.360136	10.7926	17.7605	15.9796	9.00789	11.3773	4.97179	18.4412	23.0452	0.334678	22.4904	28.4232	25.7639	17.6519	15.7362	10.2486	15.1269	12.6157	15.2248	0.281222	0.00203331
Smp_141720	44.1256	39.5361	0.59637	21.7555	27.5805	24.504	13.6812	15.3613	11.0927	46.6665	50.291	0.256262	38.7592	45.6176	39.5869	27.2828	25.2653	19.1125	25.616	21.2068	25.1355	0.279089	0.00337418
Smp_070930	292.587	283.249	0.316809	195.937	228.703	227.134	138.69	159.693	90.2399	225.344	250.923	0.246848	225.703	254.258	224.491	153.616	138.21	102.023	133.828	111.701	134.268	0.278955	0.00408085
Smp_167890	11.0246	10.2812	0.673235	15.0425	16.4788	14.8054	8.72978	10.2289	7.73566	7.30053	10.0464	0.360107	19.2782	19.9831	19.0619	13.9236	13.5802	9.68607	11.4373	10.3545	12.5243	0.266338	0.0134225
Smp_176550	15.0381	13.2413	0.55561	13.4043	15.5478	15.618	8.61303	8.31181	6.05767	18.6537	23.7248	0.353094	27.2736	27.7494	26.0688	19.2444	16.4875	12.2784	14.6745	12.542	16.6957	0.260607	0.0198244
Smp_086590	158.647	147.566	0.588265	173.266	220.565	186.435	127.78	149.225	88.1339	160.975	184.275	0.437625	286.871	348.25	321.351	217.505	208.218	137.848	192.49	170.474	188.454	0.24862	0.0125719
Smp_061870	110.912	110.039	0.483359	121.125	140.592	110.464	71.4559	88.2504	55.5493	94.6963	107.454	0.258528	145.163	169.731	169.181	106.051	104.276	66.2498	89.4745	82.5461	92.2764	0.243542	0.0200327
